# Supplementary material
Source: PubMed Central journal article supplement (PMC6348426)
Supplement: methylationSupplementaryFile1.pdf [file methylationSupplementaryFile1.pdf]

### Supplementary File 1. Mapping statistics of RRBS sequencing

| Group | Sample | Batch | Sex | # raw reads | # uniquely mapped | mappability | Coverage (X) | Bisulfite Conversion Rate | CHH methylation level (Phage) |
|-------|--------|-------|-----|-------------|-------------------|-------------|--------------|---------------------------|-------------------------------|
| AGA   | C1     | I     | M   | 61,245,798  | 26,149,105        | 42.70%      | 13.80        | 97.8%                     | 0.58%                         |
| AGA   | C14    | I     | F   | 60,628,986  | 26,138,791        | 43.11%      | 13.80        | 97.8%                     | 0.79%                         |
| AGA   | C16    | II    | M   | 35,194,500  | 21,533,106        | 61.18%      | 11.36        | 97.3%                     | 0.56%                         |
| AGA   | C25    | II    | F   | 35,804,510  | 21,315,575        | 59.53%      | 11.25        | 97.2%                     | 0.55%                         |
| AGA   | C4     | II    | M   | 36,724,538  | 22,271,211        | 60.64%      | 11.75        | 97.1%                     | 0.78%                         |
| AGA   | C7     | I     | F   | 36,724,538  | 19,617,804        | 42.95%      | 10.35        | 97.7%                     | 0.80%                         |
| LGA   | L1     | I     | M   | 58,915,794  | 34,345,336        | 58.30%      | 18.13        | 97.1%                     | 0.72%                         |
| LGA   | L2     | I     | M   | 53,518,376  | 31,751,105        | 59.33%      | 16.76        | 97.1%                     | 0.67%                         |
| LGA   | L4     | I     | F   | 57,641,385  | 34,250,660        | 59.42%      | 18.08        | 97.0%                     | 0.72%                         |
| LGA   | L6     | II    | F   | 32,523,318  | 19,716,676        | 60.62%      | 10.41        | 97.1%                     | 0.83%                         |
| LGA   | L7     | II    | M   | 30,076,719  | 18,526,448        | 61.60%      | 9.78         | 96.9%                     | 0.81%                         |
| IUGR  | U2     | I     | F   | 63,283,725  | 31,744,721        | 50.16%      | 16.75        | 97.6%                     | 0.65%                         |
| IUGR  | U4     | I     | M   | 55,009,840  | 28,131,913        | 51.14%      | 14.85        | 97.4%                     | 0.63%                         |
| IUGR  | U8     | I     | M   | 59,103,335  | 30,938,586        | 52.35%      | 16.33        | 97.5%                     | 0.60%                         |
| IUGR  | U10    | II    | F   | 28,982,758  | 18,244,986        | 62.95%      | 9.63         | 97.1%                     | 0.75%                         |
| IUGR  | U3     | II    | M   | 37,911,450  | 22,849,190        | 60.27%      | 12.06        | 97.3%                     | 0.81%                         |
| IUGR  | U5     | II    | F   | 31,465,006  | 19,540,179        | 62.10%      | 10.31        | 96.8%                     | 0.75%                         |

1. read length: 100 bp

2. fragment size (*in silico* mapping): 40-500bp
