# Supplementary material
Source: PubMed Central journal article supplement (PMC6348426)
Supplement: methylationSupplementaryFile2.pdf [file methylationSupplementaryFile2.pdf]

| <b>Gene name</b> | <b>number of high cc chromosome</b> |       |
|------------------|-------------------------------------|-------|
| FAM19A5          | 14                                  | chr22 |
| FAM19A5          | 10                                  | chr22 |
| ANKMY1           | 10                                  | chr2  |
| PTPRN2           | 9                                   | chr7  |
| CDH4             | 8                                   | chr20 |
| SORCS2           | 6                                   | chr4  |
| CEP170B          | 6                                   | chr14 |
| KDM4B            | 6                                   | chr19 |
| PDLIM2           | 5                                   | chr8  |
| ELFN1            | 5                                   | chr7  |
| RBFOX1           | 5                                   | chr16 |
| FIBCD1           | 5                                   | chr9  |
| PRKXP1           | 5                                   | chr15 |
| ZNF467           | 5                                   | chr7  |
| PHF21B           | 5                                   | chr22 |
| CCDC113          | 4                                   | chr16 |
| TACC3            | 4                                   | chr4  |
| CAMTA1           | 4                                   | chr1  |
| GALNT9           | 4                                   | chr12 |
| PDXK             | 4                                   | chr21 |
| PEX14            | 4                                   | chr1  |
| PGS1             | 4                                   | chr17 |
| COL18A1          | 4                                   | chr21 |
| CDH4             | 4                                   | chr20 |
| B3GNT3           | 4                                   | chr19 |
| TBC1D22A         | 4                                   | chr22 |
| APCDD1L-AS1      | 4                                   | chr20 |
| AGAP1            | 4                                   | chr2  |
| MACF1            | 4                                   | chr1  |
| CACNA1H          | 4                                   | chr16 |
| HIVEP3           | 4                                   | chr1  |
| NXN              | 4                                   | chr17 |
| COL23A1          | 4                                   | chr5  |
| RPRD2            | 4                                   | chr1  |
| LPGAT1           | 3                                   | chr1  |
| MYO9B            | 3                                   | chr19 |
| SSTR5            | 3                                   | chr16 |
| SDK2             | 3                                   | chr17 |
| CDH6             | 3                                   | chr5  |
| TMEM132C         | 3                                   | chr12 |
| IFNL4            | 3                                   | chr19 |
| KIAA1671         | 3                                   | chr22 |

|            |   |       |
|------------|---|-------|
| PTN        | 3 | chr7  |
| ADARB2     | 3 | chr10 |
| TXNRD1     | 3 | chr12 |
| SLC44A1    | 3 | chr9  |
| TONSL      | 3 | chr8  |
| ZBTB46     | 3 | chr20 |
| SLC25A25   | 3 | chr9  |
| FBLN1      | 3 | chr22 |
| MIR548G    | 3 | chr3  |
| DLGAP2     | 3 | chr8  |
| SURF6      | 3 | chr9  |
| VPRBP      | 3 | chr3  |
| CDH4       | 3 | chr20 |
| ZNF423     | 3 | chr16 |
| EPPK1      | 3 | chr8  |
| DNAH8      | 3 | chr6  |
| ARHGEF18   | 3 | chr19 |
| CNPY1      | 3 | chr7  |
| FZR1       | 3 | chr19 |
| MACROD1    | 3 | chr11 |
| EPHA3      | 3 | chr3  |
| CCDC85C    | 3 | chr14 |
| ENTPD6     | 3 | chr20 |
| PRKAR1B    | 3 | chr7  |
| DMD        | 3 | chrX  |
| RC3H1      | 3 | chr1  |
| RPTOR      | 3 | chr17 |
| GPC5       | 3 | chr13 |
| GPHN       | 3 | chr14 |
| ISY1-RAB43 | 3 | chr3  |
| DOCK1      | 3 | chr10 |
| AP3M1      | 3 | chr10 |
| MYO7A      | 3 | chr11 |
| RAB43      | 3 | chr3  |
| MEGF6      | 3 | chr1  |
| DNAL1      | 3 | chr14 |
| SFMBT1     | 3 | chr3  |
| FLG        | 3 | chr1  |
| PPP2R5C    | 3 | chr14 |
| NGEF       | 3 | chr2  |
| PRKAG2     | 3 | chr7  |
| NCOR2      | 3 | chr12 |
| COL8A1     | 3 | chr3  |

|            |   |       |
|------------|---|-------|
| PRDM16     | 3 | chr1  |
| GAS7       | 3 | chr17 |
| TSNARE1    | 2 | chr8  |
| GRAMD3     | 2 | chr5  |
| MLXIP      | 2 | chr12 |
| LAPTM4B    | 2 | chr8  |
| TBC1D8     | 2 | chr2  |
| GRIN3A     | 2 | chr9  |
| PRKAR1B    | 2 | chr7  |
| PNLIPRP2   | 2 | chr10 |
| EFCAB6     | 2 | chr22 |
| TMCO3      | 2 | chr13 |
| CDC42BPA   | 2 | chr1  |
| ERLEC1     | 2 | chr2  |
| MINK1      | 2 | chr17 |
| AHRR       | 2 | chr5  |
| CACNA1I    | 2 | chr22 |
| RNPEP      | 2 | chr1  |
| LARGE      | 2 | chr22 |
| CRISPLD2   | 2 | chr16 |
| AMZ1       | 2 | chr7  |
| WDR31      | 2 | chr9  |
| SUGP1      | 2 | chr19 |
| HOTAIR     | 2 | chr12 |
| PCDHGB1    | 2 | chr5  |
| B4GALT1    | 2 | chr9  |
| CNBD2      | 2 | chr20 |
| OSBPL5     | 2 | chr11 |
| BICD1      | 2 | chr12 |
| GPR75-ASB3 | 2 | chr2  |
| ABR        | 2 | chr17 |
| PPP1R26    | 2 | chr9  |
| PCDHGA4    | 2 | chr5  |
| CTBP2      | 2 | chr10 |
| AP3D1      | 2 | chr19 |
| MAEA       | 2 | chr4  |
| PHF2       | 2 | chr9  |
| PCDHGB4    | 2 | chr5  |
| MAN2A2     | 2 | chr15 |
| TTI2       | 2 | chr8  |
| CSMD1      | 2 | chr8  |
| LINGO2     | 2 | chr9  |
| RBL1       | 2 | chr20 |

|                 |   |       |
|-----------------|---|-------|
| HLCS            | 2 | chr21 |
| PDSS2           | 2 | chr6  |
| RYR1            | 2 | chr19 |
| LOC100873065    | 2 | chrX  |
| GNB1L           | 2 | chr22 |
| NUP210          | 2 | chr3  |
| CBS             | 2 | chr21 |
| PHOSPHO2-KLHL23 | 2 | chr2  |
| ZNF707          | 2 | chr8  |
| PAPLN           | 2 | chr14 |
| KIRREL2         | 2 | chr19 |
| ITSN1           | 2 | chr21 |
| TIMM17A         | 2 | chr1  |
| CHST15          | 2 | chr10 |
| LIN54           | 2 | chr4  |
| TMEM201         | 2 | chr1  |
| STK32C          | 2 | chr10 |
| SDK1            | 2 | chr7  |
| PCDH9           | 2 | chr13 |
| C9orf171        | 2 | chr9  |
| FAM189A1        | 2 | chr15 |
| XKR6            | 2 | chr8  |
| LIMK2           | 2 | chr22 |
| RGS9BP          | 2 | chr19 |
| TRIO            | 2 | chr5  |
| PCDHGA6         | 2 | chr5  |
| AASDH           | 2 | chr4  |
| KDM2B           | 2 | chr12 |
| B3GNTL1         | 2 | chr17 |
| DIAPH2          | 2 | chrX  |
| PCDHGA2         | 2 | chr5  |
| GRAMD1A         | 2 | chr19 |
| SCRIB           | 2 | chr8  |
| TP73            | 2 | chr1  |
| FAM213B         | 2 | chr1  |
| PCDHGB5         | 2 | chr5  |
| DMD             | 2 | chrX  |
| LAMA5           | 2 | chr20 |
| NEK6            | 2 | chr9  |
| SAMD3           | 2 | chr6  |
| SUN1            | 2 | chr7  |
| PLEKHG1         | 2 | chr6  |
| DPYSL4          | 2 | chr10 |

|                |   |       |
|----------------|---|-------|
| WDR16          | 2 | chr17 |
| ATP9B          | 2 | chr18 |
| CSNK1A1L       | 2 | chr13 |
| PPM1L          | 2 | chr3  |
| TPPP           | 2 | chr5  |
| IGF1R          | 2 | chr15 |
| PCDHGB6        | 2 | chr5  |
| BUB1B          | 2 | chr15 |
| ZNF664-FAM101A | 2 | chr12 |
| LOC285577      | 2 | chr5  |
| SYMPK          | 2 | chr19 |
| PPP2R2C        | 2 | chr4  |
| MOB2           | 2 | chr11 |
| SUMF1          | 2 | chr3  |
| SLC6A12        | 2 | chr12 |
| SOX3           | 2 | chrX  |
| ARHGAP6        | 2 | chrX  |
| CUX2           | 2 | chr12 |
| STMN3          | 2 | chr20 |
| GPR98          | 2 | chr5  |
| SLC27A1        | 2 | chr19 |
| KIF16B         | 2 | chr20 |
| DDX31          | 2 | chr9  |
| OTUD7A         | 2 | chr15 |
| PCDHGB2        | 2 | chr5  |
| ZNF208         | 2 | chr19 |
| KCNQ2          | 2 | chr20 |
| GREM1          | 2 | chr15 |
| CCDC94         | 2 | chr19 |
| ADAMTS17       | 2 | chr15 |
| PRKAG2         | 2 | chr7  |
| AK5            | 2 | chr1  |
| GOLGA8A        | 2 | chr15 |
| WDR37          | 2 | chr10 |
| CHP1           | 2 | chr15 |
| PLEKHH1        | 2 | chr14 |
| AUTS2          | 2 | chr7  |
| ITGB4          | 2 | chr17 |
| PCDHGA8        | 2 | chr5  |
| TMC6           | 2 | chr17 |
| GRK5           | 2 | chr10 |
| MRPL45P2       | 2 | chr17 |
| CSMD3          | 2 | chr8  |

|           |   |       |
|-----------|---|-------|
| OSBPL10   | 2 | chr3  |
| FAM196A   | 2 | chr10 |
| GAS7      | 2 | chr17 |
| FAM86HP   | 2 | chr3  |
| ATP11A    | 2 | chr13 |
| EVC2      | 2 | chr4  |
| VMP1      | 2 | chr17 |
| MCF2L     | 2 | chr13 |
| GLB1L2    | 2 | chr11 |
| PCDHGA7   | 2 | chr5  |
| KLHL29    | 2 | chr2  |
| CCL25     | 2 | chr19 |
| RXRA      | 2 | chr9  |
| TBC1D3P5  | 2 | chr17 |
| VASH1     | 2 | chr14 |
| RAB11FIP3 | 2 | chr16 |
| ARHGEF10  | 2 | chr8  |
| EXD3      | 2 | chr9  |
| PCDHGB3   | 2 | chr5  |
| GABBR2    | 2 | chr9  |
| MMEL1     | 2 | chr1  |
| ANP32E    | 2 | chr1  |
| VAV2      | 2 | chr9  |
| BNC2      | 2 | chr9  |
| PIK3C2B   | 2 | chr1  |
| EGFR      | 2 | chr7  |
| PXDN      | 2 | chr2  |
| INO80     | 2 | chr15 |
| TNS3      | 2 | chr7  |
| PCDHGA5   | 2 | chr5  |
| LOC286238 | 2 | chr9  |
| EVC       | 2 | chr4  |
| SIRT1     | 2 | chr10 |
| SPNS2     | 2 | chr17 |
| MYCBPAP   | 2 | chr17 |
| ARR3      | 2 | chrX  |
| DAPK1     | 2 | chr9  |
| JAG2      | 2 | chr14 |
| DLGAP1    | 2 | chr18 |
| PCDHGA1   | 2 | chr5  |
| OPCML     | 2 | chr11 |
| CDKL2     | 2 | chr4  |
| ZC3HAV1   | 2 | chr7  |

|               |   |       |
|---------------|---|-------|
| PCDHGA3       | 2 | chr5  |
| APOBEC3H      | 2 | chr22 |
| RNF166        | 2 | chr16 |
| NFATC1        | 2 | chr18 |
| PNPLA7        | 2 | chr9  |
| NINL          | 2 | chr20 |
| SLC47A1       | 2 | chr17 |
| MLLT1         | 2 | chr19 |
| PYGB          | 2 | chr20 |
| PCDHGA9       | 2 | chr5  |
| ZIC5          | 2 | chr13 |
| AGAP1         | 2 | chr2  |
| FRMD8         | 1 | chr11 |
| WARS2         | 1 | chr1  |
| CAMKMT        | 1 | chr2  |
| SNTG2         | 1 | chr2  |
| ZMAT5         | 1 | chr22 |
| DPP6          | 1 | chr7  |
| GPR137B       | 1 | chr1  |
| WTIP          | 1 | chr19 |
| ZNF699        | 1 | chr19 |
| RPS6KB1       | 1 | chr17 |
| FCHSD2        | 1 | chr11 |
| OPRL1         | 1 | chr20 |
| NAGPA         | 1 | chr16 |
| TMC2          | 1 | chr20 |
| PLCL1         | 1 | chr2  |
| LOC200772     | 1 | chr2  |
| ZNF529        | 1 | chr19 |
| ZFR2          | 1 | chr19 |
| PPP2R5E       | 1 | chr14 |
| C1QTNF3-AMACR | 1 | chr5  |
| GET4          | 1 | chr7  |
| FUT10         | 1 | chr8  |
| SMURF1        | 1 | chr7  |
| NCKAP5        | 1 | chr2  |
| FLYWCH2       | 1 | chr16 |
| RFX7          | 1 | chr15 |
| MAGIX         | 1 | chrX  |
| CAMK1D        | 1 | chr10 |
| PPM1D         | 1 | chr17 |
| RAB40C        | 1 | chr16 |
| LRP1B         | 1 | chr2  |

|           |   |       |
|-----------|---|-------|
| LOC284757 | 1 | chr20 |
| RBM25     | 1 | chr14 |
| GPR123    | 1 | chr10 |
| ACAD9     | 1 | chr3  |
| EFCAB12   | 1 | chr3  |
| KLHL25    | 1 | chr15 |
| NEBL      | 1 | chr10 |
| USH2A     | 1 | chr1  |
| AKT3      | 1 | chr1  |
| PHGDH     | 1 | chr1  |
| KCNJ15    | 1 | chr21 |
| FARP1     | 1 | chr13 |
| FES       | 1 | chr15 |
| UBE3C     | 1 | chr7  |
| RAB11FIP1 | 1 | chr8  |
| TRAF3IP2  | 1 | chr6  |
| PRSS57    | 1 | chr19 |
| RIN3      | 1 | chr14 |
| FAM184A   | 1 | chr6  |
| CDC123    | 1 | chr10 |
| SLC7A6    | 1 | chr16 |
| MICAL3    | 1 | chr22 |
| PCDHA4    | 1 | chr5  |
| PDZD2     | 1 | chr5  |
| THOP1     | 1 | chr19 |
| CLIP2     | 1 | chr7  |
| RNF175    | 1 | chr4  |
| KATNBL1   | 1 | chr15 |
| LDB3      | 1 | chr10 |
| TRIM26    | 1 | chr6  |
| ARHGAP1   | 1 | chr11 |
| CCDC146   | 1 | chr7  |
| CDH13     | 1 | chr16 |
| PARD3     | 1 | chr10 |
| ATF7      | 1 | chr12 |
| FAM58A    | 1 | chrX  |
| UNC45A    | 1 | chr15 |
| VIPR1     | 1 | chr3  |
| SPI1      | 1 | chr11 |
| TMED10    | 1 | chr14 |
| MCF2L     | 1 | chr13 |
| C1QL3     | 1 | chr10 |
| OCLN      | 1 | chr5  |



|           |   |       |
|-----------|---|-------|
| SNAPC4    | 1 | chr9  |
| CLCNKB    | 1 | chr1  |
| C1orf159  | 1 | chr1  |
| LEPREL1   | 1 | chr3  |
| GFRA1     | 1 | chr10 |
| MAML3     | 1 | chr4  |
| C18orf25  | 1 | chr18 |
| SHB       | 1 | chr9  |
| HID1      | 1 | chr17 |
| KATNB1    | 1 | chr16 |
| PCDHB18   | 1 | chr5  |
| LOC642846 | 1 | chr12 |
| RNF26     | 1 | chr11 |
| FGGY      | 1 | chr1  |
| RPS6KA1   | 1 | chr1  |
| CAMK2B    | 1 | chr7  |
| RASIP1    | 1 | chr19 |
| CCM2      | 1 | chr7  |
| PUM1      | 1 | chr1  |
| C19orf55  | 1 | chr19 |
| ZNF385B   | 1 | chr2  |
| ARHGAP32  | 1 | chr11 |
| PITPNA    | 1 | chr17 |
| SMAD3     | 1 | chr15 |
| FLJ45974  | 1 | chr7  |
| C9orf135  | 1 | chr9  |
| TTLL1     | 1 | chr22 |
| DUSP13    | 1 | chr10 |
| CPNE5     | 1 | chr6  |
| EFHA1     | 1 | chr13 |
| TBC1D20   | 1 | chr20 |
| NNT       | 1 | chr5  |
| MKLN1     | 1 | chr7  |
| LINGO2    | 1 | chr9  |
| SLC22A11  | 1 | chr11 |
| C5orf64   | 1 | chr5  |
| MSI2      | 1 | chr17 |
| GPR107    | 1 | chr9  |
| ZDHHC14   | 1 | chr6  |
| LHPP      | 1 | chr10 |
| UBE2U     | 1 | chr1  |
| RRP7A     | 1 | chr22 |
| TGFBR2    | 1 | chr3  |

|              |   |       |
|--------------|---|-------|
| LIG1         | 1 | chr19 |
| ADAMTS7      | 1 | chr15 |
| RASL12       | 1 | chr15 |
| PDE6C        | 1 | chr10 |
| FILIP1       | 1 | chr6  |
| KLF16        | 1 | chr19 |
| WNT4         | 1 | chr1  |
| FBXL17       | 1 | chr5  |
| METRN        | 1 | chr16 |
| PTK7         | 1 | chr6  |
| SYBU         | 1 | chr8  |
| PPP6R3       | 1 | chr11 |
| MSRA         | 1 | chr8  |
| TSPAN9       | 1 | chr12 |
| SLIT2        | 1 | chr4  |
| ADARB2-AS1   | 1 | chr10 |
| SLIT1        | 1 | chr10 |
| KSR2         | 1 | chr12 |
| LPHN3        | 1 | chr4  |
| FANCA        | 1 | chr16 |
| ADAP1        | 1 | chr7  |
| SLC3A2       | 1 | chr11 |
| SOX5         | 1 | chr12 |
| PCDHGB8P     | 1 | chr5  |
| FAN1         | 1 | chr15 |
| ALS2CL       | 1 | chr3  |
| SQSTM1       | 1 | chr5  |
| PCDHA3       | 1 | chr5  |
| SLC25A37     | 1 | chr8  |
| LOC100505817 | 1 | chr18 |
| ACACB        | 1 | chr12 |
| CCDC40       | 1 | chr17 |
| KAZN         | 1 | chr1  |
| PTPRT        | 1 | chr20 |
| HSPG2        | 1 | chr1  |
| SEZ6L2       | 1 | chr16 |
| TXNRD1       | 1 | chr12 |
| PKD1L2       | 1 | chr16 |
| LOXL2        | 1 | chr8  |
| MFSD12       | 1 | chr19 |
| BDP1         | 1 | chr5  |
| NEK6         | 1 | chr9  |
| TTC40        | 1 | chr10 |

|           |   |       |
|-----------|---|-------|
| SRCAP     | 1 | chr16 |
| PCDHA8    | 1 | chr5  |
| MTMR14    | 1 | chr3  |
| TRIM65    | 1 | chr17 |
| PLIN4     | 1 | chr19 |
| MIR5694   | 1 | chr10 |
| GRM4      | 1 | chr6  |
| IPO11     | 1 | chr5  |
| SYNE2     | 1 | chr14 |
| ITPKB     | 1 | chr1  |
| TBL1X     | 1 | chrX  |
| NLRP5     | 1 | chr19 |
| PACRG-AS1 | 1 | chr6  |
| TMC7      | 1 | chr16 |
| CDH12     | 1 | chr5  |
| ZMYM5     | 1 | chr13 |
| ZNF346    | 1 | chr5  |
| DNMT1     | 1 | chr19 |
| M1AP      | 1 | chr2  |
| KIAA0586  | 1 | chr14 |
| SMARCC1   | 1 | chr3  |
| C1QTNF3   | 1 | chr5  |
| SLC7A9    | 1 | chr19 |
| WSB2      | 1 | chr12 |
| MIR548H2  | 1 | chr3  |
| MGLL      | 1 | chr3  |
| CUEDC1    | 1 | chr17 |
| RBFOX1    | 1 | chr16 |
| FLJ40194  | 1 | chr17 |
| SIPA1L3   | 1 | chr19 |
| GALNS     | 1 | chr16 |
| GLB1L3    | 1 | chr11 |
| CDK19     | 1 | chr6  |
| DENND5B   | 1 | chr12 |
| CACNA1B   | 1 | chr9  |
| SOX6      | 1 | chr11 |
| LRPAP1    | 1 | chr4  |
| CHD9      | 1 | chr16 |
| ST3GAL3   | 1 | chr1  |
| LHX9      | 1 | chr1  |
| SBNO1     | 1 | chr12 |
| KCNK13    | 1 | chr14 |
| MURC      | 1 | chr9  |

|              |   |       |
|--------------|---|-------|
| WDR45        | 1 | chrX  |
| RHBDL2       | 1 | chr1  |
| RIMBP2       | 1 | chr12 |
| ADAMTS2      | 1 | chr5  |
| TTC12        | 1 | chr11 |
| NLRC3        | 1 | chr16 |
| TSHZ2        | 1 | chr20 |
| C14orf166B   | 1 | chr14 |
| ABCA13       | 1 | chr7  |
| FBLN7        | 1 | chr2  |
| MYL9         | 1 | chr20 |
| COPS4        | 1 | chr4  |
| ST6GAL2      | 1 | chr2  |
| 14-Sep       | 1 | chr7  |
| SOLH         | 1 | chr16 |
| PPP2R2C      | 1 | chr4  |
| CELA3A       | 1 | chr1  |
| TRAF3        | 1 | chr14 |
| ANO9         | 1 | chr11 |
| CYTH4        | 1 | chr22 |
| ERMAP        | 1 | chr1  |
| CHID1        | 1 | chr11 |
| ZNF787       | 1 | chr19 |
| USP15        | 1 | chr12 |
| TEN1         | 1 | chr17 |
| IL17RE       | 1 | chr3  |
| FAM129B      | 1 | chr9  |
| SAFB2        | 1 | chr19 |
| PCDHGB7      | 1 | chr5  |
| KAL1         | 1 | chrX  |
| AK8          | 1 | chr9  |
| RFX1         | 1 | chr19 |
| BAIAP2       | 1 | chr17 |
| ATG14        | 1 | chr14 |
| PPP1R2       | 1 | chr3  |
| PACRG        | 1 | chr6  |
| DPYS         | 1 | chr8  |
| PGD          | 1 | chr1  |
| ZBBX         | 1 | chr3  |
| CYP4Z2P      | 1 | chr1  |
| OR2C1        | 1 | chr16 |
| CCDC178      | 1 | chr18 |
| LOC100132831 | 1 | chrX  |

|                        |   |       |
|------------------------|---|-------|
| FAM86B3P               | 1 | chr8  |
| USP37                  | 1 | chr2  |
| DTX2P1-UPK3BP1-PMS2P11 | 1 | chr7  |
| CRMP1                  | 1 | chr4  |
| LOC100507424           | 1 | chr12 |
| MAD2L2                 | 1 | chr1  |
| RGS10                  | 1 | chr10 |
| WDR1                   | 1 | chr4  |
| SF3B3                  | 1 | chr16 |
| AXDND1                 | 1 | chr1  |
| FYCO1                  | 1 | chr3  |
| AFAP1L2                | 1 | chr10 |
| NTNG1                  | 1 | chr1  |
| CUL2                   | 1 | chr10 |
| PDZRN4                 | 1 | chr12 |
| GAS6-AS1               | 1 | chr13 |
| SH2B1                  | 1 | chr16 |
| CTPS2                  | 1 | chrX  |
| FLJ33581               | 1 | chr20 |
| PPM1F                  | 1 | chr22 |
| CPQ                    | 1 | chr8  |
| MRGPRF                 | 1 | chr11 |
| GLTSCR1                | 1 | chr19 |
| RTN4RL1                | 1 | chr17 |
| PRKG1                  | 1 | chr10 |
| PHRF1                  | 1 | chr11 |
| TEAD4                  | 1 | chr12 |
| POU2AF1                | 1 | chr11 |
| CACNA2D4               | 1 | chr12 |
| DNAH11                 | 1 | chr7  |
| BABAM1                 | 1 | chr19 |
| IGFBP5                 | 1 | chr2  |
| CNOT2                  | 1 | chr12 |
| LOC100130855           | 1 | chr15 |
| ATXN3                  | 1 | chr14 |
| LRCOL1                 | 1 | chr12 |
| PHIP                   | 1 | chr6  |
| LYRM4                  | 1 | chr6  |
| METTL15                | 1 | chr11 |
| BCAP29                 | 1 | chr7  |
| LTBP1                  | 1 | chr2  |
| SLC1A7                 | 1 | chr1  |
| GOLGA3                 | 1 | chr12 |

|                |   |       |
|----------------|---|-------|
| IGSF11         | 1 | chr3  |
| LOC100652770   | 1 | chr18 |
| PPP2R2A        | 1 | chr8  |
| ACSF3          | 1 | chr16 |
| SENP6          | 1 | chr6  |
| CRELD2         | 1 | chr22 |
| CCT6P3         | 1 | chr7  |
| MERTK          | 1 | chr2  |
| CCDC170        | 1 | chr6  |
| STEAP3         | 1 | chr2  |
| SLC14A2        | 1 | chr18 |
| RNU6-66        | 1 | chr19 |
| CCDC175        | 1 | chr14 |
| PARK2          | 1 | chr6  |
| TTC7B          | 1 | chr14 |
| PCDHA5         | 1 | chr5  |
| MIR5009        | 1 | chr21 |
| GALNT9         | 1 | chr12 |
| FAM182B        | 1 | chr20 |
| SHANK1         | 1 | chr19 |
| CTBP1          | 1 | chr4  |
| FAM78A         | 1 | chr9  |
| LRFN3          | 1 | chr19 |
| LOC728716      | 1 | chr1  |
| TOB2           | 1 | chr22 |
| FLJ39080       | 1 | chr8  |
| SMARCA4        | 1 | chr19 |
| PITPNM3        | 1 | chr17 |
| FA2H           | 1 | chr16 |
| LMNA           | 1 | chr1  |
| FLJ42102       | 1 | chr11 |
| MGAT5B         | 1 | chr17 |
| TBCD           | 1 | chr17 |
| MCTP1          | 1 | chr5  |
| RAB6B          | 1 | chr3  |
| CSH1           | 1 | chr17 |
| SORBS2         | 1 | chr4  |
| B4GALNT4       | 1 | chr11 |
| ALPL           | 1 | chr1  |
| ARHGAP19-SLIT1 | 1 | chr10 |
| PCDHGA10       | 1 | chr5  |
| CNN2           | 1 | chr19 |
| CASP8AP2       | 1 | chr6  |

|              |   |       |
|--------------|---|-------|
| KCNK4        | 1 | chr11 |
| CPXM2        | 1 | chr10 |
| ZFP82        | 1 | chr19 |
| PCSK2        | 1 | chr20 |
| TUFT1        | 1 | chr1  |
| ABL1         | 1 | chr9  |
| RNF103-CHMP3 | 1 | chr2  |
| FBXL7        | 1 | chr5  |
| LINC00674    | 1 | chr17 |
| RIMS2        | 1 | chr8  |
| ARHGAP33     | 1 | chr19 |
| UCK2         | 1 | chr1  |
| KCND2        | 1 | chr7  |
| EPHA2        | 1 | chr1  |
| TRPV3        | 1 | chr17 |
| TRMU         | 1 | chr22 |
| ZC3H7B       | 1 | chr22 |
| CDH19        | 1 | chr18 |
| ZNF471       | 1 | chr19 |
| HS6ST1       | 1 | chr2  |
| FER1L6       | 1 | chr8  |
| KIF17        | 1 | chr1  |
| C14orf132    | 1 | chr14 |
| TUBB3        | 1 | chr16 |
| MUC4         | 1 | chr3  |
| KRAS         | 1 | chr12 |
| CAMKK1       | 1 | chr17 |
| CELF4        | 1 | chr18 |
| PIEZO1       | 1 | chr16 |
| TRABD2B      | 1 | chr1  |
| RAB11FIP3    | 1 | chr16 |
| KIF26B       | 1 | chr1  |
| CRY2         | 1 | chr11 |
| ASB18        | 1 | chr2  |
| GRID2        | 1 | chr4  |
| ZNF284       | 1 | chr19 |
| RPL3L        | 1 | chr16 |
| TENM2        | 1 | chr5  |
| HMX1         | 1 | chr4  |
| SHROOM2      | 1 | chrX  |
| SNX29P2      | 1 | chr16 |
| TERT         | 1 | chr5  |
| ATP6V0A1     | 1 | chr17 |

|              |   |       |
|--------------|---|-------|
| GPR125       | 1 | chr4  |
| SYAP1        | 1 | chrX  |
| COL21A1      | 1 | chr6  |
| WDR27        | 1 | chr6  |
| IGSF23       | 1 | chr19 |
| SBK2         | 1 | chr19 |
| MORN1        | 1 | chr1  |
| IQGAP1       | 1 | chr15 |
| HPD          | 1 | chr12 |
| SEC16A       | 1 | chr9  |
| CADM2        | 1 | chr3  |
| STRN4        | 1 | chr19 |
| HRNR         | 1 | chr1  |
| COL5A3       | 1 | chr19 |
| MCAT         | 1 | chr22 |
| LRRC47       | 1 | chr1  |
| FGD4         | 1 | chr12 |
| PITPNM2      | 1 | chr12 |
| GPR32        | 1 | chr19 |
| ABR          | 1 | chr17 |
| DPP10        | 1 | chr2  |
| FRMD5        | 1 | chr15 |
| FAM101A      | 1 | chr12 |
| LSAMP        | 1 | chr3  |
| FRY          | 1 | chr13 |
| FBXL18       | 1 | chr7  |
| MOK          | 1 | chr14 |
| GRIN2A       | 1 | chr16 |
| ENPP3        | 1 | chr6  |
| TRAF3IP2-AS1 | 1 | chr6  |
| HEATR4       | 1 | chr14 |
| ELL          | 1 | chr19 |
| PHF17        | 1 | chr4  |
| GFOD1        | 1 | chr6  |
| C16orf55     | 1 | chr16 |
| PCDHB19P     | 1 | chr5  |
| HHAT         | 1 | chr1  |
| CA1          | 1 | chr8  |
| CCDC154      | 1 | chr16 |
| C2orf83      | 1 | chr2  |
| LSM12        | 1 | chr17 |
| PTGFRN       | 1 | chr1  |
| RFC2         | 1 | chr7  |



|          |   |       |
|----------|---|-------|
| GPM6B    | 1 | chrX  |
| MARK2    | 1 | chr11 |
| CCDC166  | 1 | chr8  |
| SNX14    | 1 | chr6  |
| ARHGEF4  | 1 | chr2  |
| SH3TC2   | 1 | chr5  |
| DENND6B  | 1 | chr22 |
| PRMT10   | 1 | chr4  |
| PCNT     | 1 | chr21 |
| TBC1D30  | 1 | chr12 |
| ARSG     | 1 | chr17 |
| BCAR3    | 1 | chr1  |
| CILP2    | 1 | chr19 |
| GATAD2B  | 1 | chr1  |
| FXN      | 1 | chr9  |
| FAM188B  | 1 | chr7  |
| BIRC7    | 1 | chr20 |
| PLXNB3   | 1 | chrX  |
| VPS53    | 1 | chr17 |
| ATP2B2   | 1 | chr3  |
| FAM71E2  | 1 | chr19 |
| FLT4     | 1 | chr5  |
| TYW1     | 1 | chr7  |
| RTEL1    | 1 | chr20 |
| NIPA2    | 1 | chr15 |
| COL11A1  | 1 | chr1  |
| PCDHA2   | 1 | chr5  |
| DNAH17   | 1 | chr17 |
| SRGAP1   | 1 | chr12 |
| DLGAP1   | 1 | chr18 |
| NEGR1    | 1 | chr1  |
| MYOM2    | 1 | chr8  |
| COBLL1   | 1 | chr2  |
| B3GAT1   | 1 | chr11 |
| SLC9A7   | 1 | chrX  |
| MIR548AN | 1 | chr13 |
| SYNM     | 1 | chr15 |
| BCYRN1   | 1 | chrX  |
| ACAN     | 1 | chr15 |
| ITPK1    | 1 | chr14 |
| GPR151   | 1 | chr5  |
| GPIHBP1  | 1 | chr8  |
| CFDP1    | 1 | chr16 |

|          |   |       |
|----------|---|-------|
| EEF1A2   | 1 | chr20 |
| CPLX2    | 1 | chr5  |
| XYL1     | 1 | chr16 |
| TRIM67   | 1 | chr1  |
| POC1B    | 1 | chr12 |
| PDE1C    | 1 | chr7  |
| CDH22    | 1 | chr20 |
| MECOM    | 1 | chr3  |
| TRABD    | 1 | chr22 |
| TBC1D16  | 1 | chr17 |
| SEMA3D   | 1 | chr7  |
| GATAD2A  | 1 | chr19 |
| ACYP1    | 1 | chr14 |
| SCAI     | 1 | chr9  |
| NPHP4    | 1 | chr1  |
| SNN      | 1 | chr16 |
| GTF3C1   | 1 | chr16 |
| CDHR2    | 1 | chr5  |
| KDM6A    | 1 | chrX  |
| SLCO5A1  | 1 | chr8  |
| COL26A1  | 1 | chr7  |
| MYH16    | 1 | chr7  |
| MRTO4    | 1 | chr1  |
| HPS3     | 1 | chr3  |
| PIGG     | 1 | chr4  |
| RECK     | 1 | chr9  |
| DOCK8    | 1 | chr9  |
| DYM      | 1 | chr18 |
| MGRN1    | 1 | chr16 |
| ERCC6    | 1 | chr10 |
| ZMYND8   | 1 | chr20 |
| HEATR2   | 1 | chr7  |
| PDE9A    | 1 | chr21 |
| TMEM132A | 1 | chr11 |
| PKD1     | 1 | chr16 |
| AKAP10   | 1 | chr17 |
| CHRNA9   | 1 | chr4  |
| SH3RF3   | 1 | chr2  |
| LRRC27   | 1 | chr10 |
| RGN      | 1 | chrX  |
| UBR3     | 1 | chr2  |
| AFMID    | 1 | chr17 |
| RMDN2    | 1 | chr2  |

|              |   |       |
|--------------|---|-------|
| ARAP1        | 1 | chr11 |
| ACOX2        | 1 | chr3  |
| LAMA3        | 1 | chr18 |
| ZNF550       | 1 | chr19 |
| DOCK4        | 1 | chr7  |
| HSD17B14     | 1 | chr19 |
| TMC1         | 1 | chr9  |
| LINC00340    | 1 | chr6  |
| EGFR         | 1 | chr7  |
| LOC100506207 | 1 | chr6  |
| ZNF77        | 1 | chr19 |
| ASTN2        | 1 | chr9  |
| PIK3C2G      | 1 | chr12 |
| CDK16        | 1 | chrX  |
| KCNMB2       | 1 | chr3  |
| CMTM8        | 1 | chr3  |
| INMT-FAM188B | 1 | chr7  |
| ERMP1        | 1 | chr9  |
| SPTBN5       | 1 | chr15 |
| CEP120       | 1 | chr5  |
| ADAMTSL1     | 1 | chr9  |
| CNKSR3       | 1 | chr6  |
| RTN4         | 1 | chr2  |
| MYT1L        | 1 | chr2  |
| NELFB        | 1 | chr9  |
| PNPLA1       | 1 | chr6  |
| POU6F1       | 1 | chr12 |
| LOC338651    | 1 | chr11 |
| GPR133       | 1 | chr12 |
| EMP1         | 1 | chr12 |
| KIFC1        | 1 | chr6  |
| SLC47A2      | 1 | chr17 |
| RFX2         | 1 | chr19 |
| POU6F2       | 1 | chr7  |
| GUCY1A2      | 1 | chr11 |
| PCDHA6       | 1 | chr5  |
| TM7SF3       | 1 | chr12 |
| LRRTM4       | 1 | chr2  |
| RREB1        | 1 | chr6  |
| TBL1XR1      | 1 | chr3  |
| MYO18A       | 1 | chr17 |
| CDH23        | 1 | chr10 |
| USP49        | 1 | chr6  |

|                |   |       |
|----------------|---|-------|
| CTNNA3         | 1 | chr10 |
| DNMT3B         | 1 | chr20 |
| FBP2           | 1 | chr9  |
| PPCS           | 1 | chr1  |
| POU4F1-AS1     | 1 | chr13 |
| KIAA2022       | 1 | chrX  |
| EPN2           | 1 | chr17 |
| ARHGAP22       | 1 | chr10 |
| PCDHA7         | 1 | chr5  |
| MYO1E          | 1 | chr15 |
| RCOR2          | 1 | chr11 |
| TMEM255B       | 1 | chr13 |
| LOC284009      | 1 | chr17 |
| MAGEE1         | 1 | chrX  |
| AGPAT4         | 1 | chr6  |
| TTLL6          | 1 | chr17 |
| DDX1           | 1 | chr2  |
| SPIRE1         | 1 | chr18 |
| SART3          | 1 | chr12 |
| ERICH1-AS1     | 1 | chr8  |
| 9-Sep          | 1 | chr17 |
| SLAMF8         | 1 | chr1  |
| RTEL1-TNFRSF6B | 1 | chr20 |
| RCL1           | 1 | chr9  |
| PHC2           | 1 | chr1  |
| PTPRE          | 1 | chr10 |
| ZNF275         | 1 | chrX  |
| CASZ1          | 1 | chr1  |
| NHSL1          | 1 | chr6  |
| CDK14          | 1 | chr7  |
| RIN1           | 1 | chr11 |
| SCN5A          | 1 | chr3  |
| LOC729732      | 1 | chr8  |
| LAMC1          | 1 | chr1  |
| HELZ2          | 1 | chr20 |
| ASIC3          | 1 | chr7  |
| IL2RA          | 1 | chr10 |
| CTSD           | 1 | chr11 |
| YPEL1          | 1 | chr22 |
| SH3BP2         | 1 | chr4  |
| KCNIP4         | 1 | chr4  |
| KIF1A          | 1 | chr2  |
| PRPSAP2        | 1 | chr17 |

|           |   |       |
|-----------|---|-------|
| PDCD1     | 1 | chr2  |
| SCFD2     | 1 | chr4  |
| MRPS35    | 1 | chr12 |
| COX10-AS1 | 1 | chr17 |
| C19orf71  | 1 | chr19 |
| CACNB2    | 1 | chr10 |
| LMAN2     | 1 | chr5  |
| NDUFS4    | 1 | chr5  |
| TMEM104   | 1 | chr17 |
| MPHOSPH9  | 1 | chr12 |
| BCL11B    | 1 | chr14 |
| RIT2      | 1 | chr18 |
| GALM      | 1 | chr2  |
| INTS8     | 1 | chr8  |
| TIAM2     | 1 | chr6  |
| THEM6     | 1 | chr8  |
| CHMP6     | 1 | chr17 |
| HHIPL2    | 1 | chr1  |
| KPNA1     | 1 | chr3  |
| RASA3     | 1 | chr13 |
| IFT27     | 1 | chr22 |
| GMEB1     | 1 | chr1  |
| GSTM3     | 1 | chr1  |
| XXYLT1    | 1 | chr3  |
| FAM21A    | 1 | chr10 |
| ITSN1     | 1 | chr21 |
| PFDN1     | 1 | chr5  |
| CTNNA2    | 1 | chr2  |
| MPRIP     | 1 | chr17 |
| FGF1      | 1 | chr5  |
| IGSF9B    | 1 | chr11 |
| TPP2      | 1 | chr13 |
| STAB2     | 1 | chr12 |
| ASIC2     | 1 | chr17 |
| USP34     | 1 | chr2  |
| NCAM2     | 1 | chr21 |
| PIP5K1C   | 1 | chr19 |
| HPCAL1    | 1 | chr2  |
| ABCB9     | 1 | chr12 |
| SLC22A20  | 1 | chr11 |
| PRDM6     | 1 | chr5  |
| RIBC2     | 1 | chr22 |
| LOC285441 | 1 | chr4  |

|                |   |       |
|----------------|---|-------|
| TRPM5          | 1 | chr11 |
| DVL3           | 1 | chr3  |
| XRN2           | 1 | chr20 |
| TLL2           | 1 | chr10 |
| MRPL4          | 1 | chr19 |
| ANKRD29        | 1 | chr18 |
| CPNE7          | 1 | chr16 |
| LRP1           | 1 | chr12 |
| GAS6           | 1 | chr13 |
| ZFPM2          | 1 | chr8  |
| WBSCR17        | 1 | chr7  |
| LOC389634      | 1 | chr12 |
| CCDC109B       | 1 | chr4  |
| UBR1           | 1 | chr15 |
| PEPD           | 1 | chr19 |
| ZNF536         | 1 | chr19 |
| CUX1           | 1 | chr7  |
| DPYSL5         | 1 | chr2  |
| RNU6-81        | 1 | chr2  |
| MCOLN1         | 1 | chr19 |
| EEF2K          | 1 | chr16 |
| DAB1           | 1 | chr1  |
| SLC6A5         | 1 | chr11 |
| PRELP          | 1 | chr1  |
| C1orf86        | 1 | chr1  |
| JAZF1          | 1 | chr7  |
| LRRC4C         | 1 | chr11 |
| ERCC2          | 1 | chr19 |
| PQLC1          | 1 | chr18 |
| ZFP30          | 1 | chr19 |
| LINC00635      | 1 | chr3  |
| BAIAP2L2       | 1 | chr22 |
| CD3G           | 1 | chr11 |
| SLC12A3        | 1 | chr16 |
| LOC441666      | 1 | chr10 |
| IMPDH1         | 1 | chr7  |
| FLRT1          | 1 | chr11 |
| KCNA1          | 1 | chr12 |
| INPP5A         | 1 | chr10 |
| BLOC1S5-TXNDC5 | 1 | chr6  |
| TRIM71         | 1 | chr3  |
| UBP1           | 1 | chr3  |
| C14orf159      | 1 | chr14 |

|            |   |       |
|------------|---|-------|
| TBX5       | 1 | chr12 |
| VSTM1      | 1 | chr19 |
| ZNF765     | 1 | chr19 |
| ASB13      | 1 | chr10 |
| SIK3       | 1 | chr11 |
| ABCG1      | 1 | chr21 |
| CHMP2A     | 1 | chr19 |
| EBF2       | 1 | chr8  |
| ZNF236     | 1 | chr18 |
| GABRA3     | 1 | chrX  |
| GYPE       | 1 | chr2  |
| UHRF2      | 1 | chr9  |
| ANKRD30BL  | 1 | chr2  |
| FLJ46300   | 1 | chr10 |
| GPR56      | 1 | chr16 |
| ZNF362     | 1 | chr1  |
| ZC3H6      | 1 | chr2  |
| DGKE       | 1 | chr17 |
| HGFAC      | 1 | chr4  |
| DNAH9      | 1 | chr17 |
| PRTG       | 1 | chr15 |
| OR6N1      | 1 | chr1  |
| LONP1      | 1 | chr19 |
| RGS6       | 1 | chr14 |
| C6orf118   | 1 | chr6  |
| PREX1      | 1 | chr20 |
| CDAN1      | 1 | chr15 |
| GPR124     | 1 | chr8  |
| HERC1      | 1 | chr15 |
| FLJ22447   | 1 | chr14 |
| PCDHGB6    | 1 | chr5  |
| PNPLA6     | 1 | chr19 |
| CATSPERD   | 1 | chr19 |
| CCDC63     | 1 | chr12 |
| UBAC2      | 1 | chr13 |
| STARD4-AS1 | 1 | chr5  |
| POM121L1P  | 1 | chr22 |
| SLC25A33   | 1 | chr1  |
| RORA       | 1 | chr15 |
| TRAPPC9    | 1 | chr8  |
| CABLES2    | 1 | chr20 |
| PCDHA1     | 1 | chr5  |
| ST8SIA1    | 1 | chr12 |

|           |   |       |
|-----------|---|-------|
| GRWD1     | 1 | chr19 |
| TP73      | 1 | chr1  |
| ATP2A3    | 1 | chr17 |
| GPR108    | 1 | chr19 |
| SGTA      | 1 | chr19 |
| LPPR3     | 1 | chr19 |
| PTGDR2    | 1 | chr11 |
| IGFBP2    | 1 | chr2  |
| HCN1      | 1 | chr5  |
| PI4KAP1   | 1 | chr22 |
| RBFOX3    | 1 | chr17 |
| CD82      | 1 | chr11 |
| PRR14     | 1 | chr16 |
| ARNT2     | 1 | chr15 |
| R3HDM4    | 1 | chr19 |
| LAMA1     | 1 | chr18 |
| CCDC129   | 1 | chr7  |
| PPAT      | 1 | chr4  |
| ISM1      | 1 | chr20 |
| UVSSA     | 1 | chr4  |
| GLTPD1    | 1 | chr1  |
| PIBF1     | 1 | chr13 |
| EOGT      | 1 | chr3  |
| MYO7B     | 1 | chr2  |
| LINC00598 | 1 | chr13 |
| HMG20B    | 1 | chr19 |
| RPSA      | 1 | chr3  |
| JARID2    | 1 | chr6  |
| DLEU7     | 1 | chr13 |
| TPGS1     | 1 | chr19 |
| PDE10A    | 1 | chr6  |
| PRELID2   | 1 | chr5  |
| GABRB3    | 1 | chr15 |
| DPYD      | 1 | chr1  |
| PODXL     | 1 | chr7  |
| GCC2      | 1 | chr2  |
| MMACHC    | 1 | chr1  |
| RGS7      | 1 | chr1  |
| AATK      | 1 | chr17 |
| DOK7      | 1 | chr4  |
| PCDHGA11  | 1 | chr5  |
| PRKCZ     | 1 | chr1  |
| ENTPD8    | 1 | chr9  |



|               |   |       |
|---------------|---|-------|
| AUTS2         | 1 | chr7  |
| AJAP1         | 1 | chr1  |
| SLC35D2       | 1 | chr9  |
| SHROOM3       | 1 | chr4  |
| GATA5         | 1 | chr20 |
| AGT           | 1 | chr1  |
| LCLAT1        | 1 | chr2  |
| MAPK8IP2      | 1 | chr22 |
| C1orf151-NBL1 | 1 | chr1  |
| TLE2          | 1 | chr19 |
| RABEP1        | 1 | chr17 |
| DLEC1         | 1 | chr3  |
| GLB1          | 1 | chr3  |
| DOK6          | 1 | chr18 |
| SETBP1        | 1 | chr18 |
| COL4A1        | 1 | chr13 |
| DGKQ          | 1 | chr4  |
| SLCO3A1       | 1 | chr15 |
| TMEM51-AS1    | 1 | chr1  |
| COL6A1        | 1 | chr21 |
| PPARD         | 1 | chr6  |
| YAE1D1        | 1 | chr7  |
| ZNF229        | 1 | chr19 |
| STX8          | 1 | chr17 |
| MROH1         | 1 | chr8  |
| SPATA2L       | 1 | chr16 |
| MED16         | 1 | chr19 |
| ROBO1         | 1 | chr3  |
| SCAMP4        | 1 | chr19 |
| KCNAB1-AS2    | 1 | chr3  |
| DMD           | 1 | chrX  |
| SLC16A6       | 1 | chr17 |
| DHRS4L1       | 1 | chr14 |
| CARD9         | 1 | chr9  |
| SCTR          | 1 | chr2  |
| VSX2          | 1 | chr14 |
| UTP6          | 1 | chr17 |
| FSTL4         | 1 | chr5  |
| TXLNA         | 1 | chr1  |
| DENND6A       | 1 | chr3  |
| USP2          | 1 | chr11 |
| PDZRN3        | 1 | chr3  |
| FCGRT         | 1 | chr19 |

|           |   |       |
|-----------|---|-------|
| PEMT      | 1 | chr17 |
| TRPC2     | 1 | chr11 |
| TEN1-CDK3 | 1 | chr17 |
| ATP2C2    | 1 | chr16 |
| KIAA1551  | 1 | chr12 |
| ADAM5     | 1 | chr8  |
| CABP7     | 1 | chr22 |
| C7orf50   | 1 | chr7  |
| LAMC3     | 1 | chr9  |
| PDPN      | 1 | chr1  |
| ANKFY1    | 1 | chr17 |
| LRRC20    | 1 | chr10 |
| ADAMTS12  | 1 | chr5  |
| CNTNAP5   | 1 | chr2  |
| MYO16     | 1 | chr13 |
| TRAPPC10  | 1 | chr21 |
| ZNF333    | 1 | chr19 |
| OCEL1     | 1 | chr19 |
| ACOT9     | 1 | chrX  |
| NDUFA7    | 1 | chr19 |
| PITPNC1   | 1 | chr17 |
| CORIN     | 1 | chr4  |
| FBXL22    | 1 | chr15 |
| CCDC47    | 1 | chr17 |
| TMEM63C   | 1 | chr14 |
| LRIT1     | 1 | chr10 |
| TMEM175   | 1 | chr4  |
| KCNAB1    | 1 | chr3  |
| SGCD      | 1 | chr5  |
| TPO       | 1 | chr2  |
| SNX25     | 1 | chr4  |
| RAB3GAP1  | 1 | chr2  |
| SOAT1     | 1 | chr1  |
| RIPK4     | 1 | chr21 |
| TLN2      | 1 | chr15 |
| PCNXL2    | 1 | chr1  |

**site locations**

48911785,48958730,48958739,48982763,48985828,48990018,48999195,49027302,4913892  
48982763,48985828,48990018,48999195,49027302,49138921,49146195,49146358,4914636  
241497322,241497338,241497358,241497362,241497366,241497368,241497374,241497379  
157496416,157496434,157578073,157579942,157818754,158240253,158240257,158240270  
59897399,59971800,60055607,60097995,60175223,60175237,59875598,60450432  
7218718,7218745,7218749,7428386,7484966,7494167  
105335048,105337802,105344316,105344603,105344761,105359658  
4981632,5055995,5081230,5107851,5127897,5133464  
22441821,22441851,22441889,22441890,22441924  
1786170,1786179,1786181,1786193,1786266  
6799428,6799457,6799461,6507637,7013945  
133785745,133787347,133794455,133800092,133800093  
101094460,101094461,101094520,101094534,101096584  
149463191,149463193,149463218,149463220,149463242  
45277552,45331418,45338855,45338941,45339593  
58299811,58299812,58299910,58300770  
1731696,1731711,1731956,1737403  
6965401,7290879,7700594,7765495  
132688049,132699913,132823444,132898445  
45152879,45157126,45157127,45159997  
10561558,10620238,10631814,10640437  
76386449,76386457,76386524,76386538  
46907084,46907093,46909514,46912946  
60097995,60175223,60175237,60450432  
17906289,17906308,17906316,17906398  
47508572,47320509,47548187,47557636  
57155391,57155397,57155404,57171961  
236613477,236847317,236944858,236724860  
39621551,39803565,39940222,39940223  
1206630,1252139,1252231,1254368  
42193265,42193270,42193273,42193276  
725432,741559,763518,743920  
177761376,177808675,177968358,177968359  
150375271,150410977,150423966,150423967  
211933745,211979398,211979399  
17283402,17298891,17301704  
1129461,1129485,1129502  
71387220,71387221,71524887  
31317785,31317788,31317802  
129084728,129084816,129084821  
39737844,39737861,39737920  
25426949,25448652,25549869

136968874,136968948,136968953  
1438422,1590616,1774958  
104670845,104670846,104728336  
108134968,108135001,108135012  
145658369,145658525,145658526  
62379444,62432152,62432177  
130841923,130842141,130845150  
45978046,45981384,45981447  
99514627,99376747,99376748  
1522683,1478277,1496555  
136199464,136199465,136199502  
51531473,51531495,51531517  
60175223,60175237,60450432  
49533382,49544818,49724869  
144941419,144946817,144946818  
38803489,38803490,38865442  
7474953,7480194,7480362  
155302486,155302850,155302867  
3526496,3526784,3533273  
63827642,63836680,63885704  
89440427,89180075,89180077  
100019739,100020623,100026843  
25186115,25195018,25202891  
598729,631037,752449  
31693693,32248521,33114382  
173944474,173944478,173944511  
78597523,78683458,78793474  
92638597,93503882,92577315  
67139912,67142112,67142113  
128838177,128838228,128838489  
128944079,128944080,129049534  
75880423,75893632,75893633  
76862024,76862025,76840405  
128838177,128838228,128838489  
3437665,3450684,3457896  
74114837,74136351,74145938  
52999787,52999788,53000104  
152276614,152276624,152276670  
102247753,102247767,102247785  
233760414,233760457,233770144  
151439827,151488536,151518005  
124860830,124986517,125032798  
99514627,99376747,99376748

3158641,3286077,3286078  
9918198,9820694,9820695  
143373004,143373212  
125804281,125804303  
122626379,122626380  
98827209,98832214  
101654460,101761168  
104481465,104481466  
598729,631037  
118387225,118387237  
43950405,44039859  
114200379,114200412  
227463696,227332148  
54036817,54036818  
4767973,4795306  
355048,429380  
40082534,40082538  
201953292,201953293  
34225416,34285345  
84903207,84872049  
2742449,2742484  
116086817,116086818  
19390747,19410480  
54362455,54362496  
140788372,140807269  
33132490,33132491  
34610181,34610253  
3140627,3175308  
32429119,32476989  
54036817,54036818  
990952,1071503  
138377842,138377899  
140788372,140807269  
126741727,126840272  
2131565,2131578  
1316894,1324480  
96362048,96362235  
140788372,140807269  
91459473,91459474  
33366032,33366043  
4584683,3113336  
28476462,29110627  
35661806,35661836

38128534,38128554  
107759664,107759665  
38956838,39003131  
22527641,22527642  
19787307,19796766  
13448093,13453494  
44486763,44486917  
170581807,170580614  
144767565,144768531  
73720684,73720685  
36353881,36353927  
35043780,35246558  
201925854,201925855  
125804048,125836294  
83856659,83896149  
9670833,9672089  
134110853,134111481  
4134106,4136614  
67196342,67197164  
135386172,135393720  
29745471,29848976  
10820620,10966290  
31661289,31661290  
33168604,33168000  
14218867,14454982  
140788372,140807269  
57248956,57249091  
121881846,121881847  
80988582,80988416  
96353642,96353674  
140788372,140807269  
35509160,35514577  
144887733,144877834  
3650014,3607518  
2522390,2522391  
140788372,140807269  
31693693,32248521  
60926221,60930091  
127064945,127041643  
130581876,130608855  
893295,902764  
151083585,151102302  
134010311,134014621

9533988,9533997  
76833113,76910759  
37679533,37679729  
160672427,160609898  
664322,677974  
99206152,99206834  
140788372,140807269  
40501478,40507830  
124590414,124786052  
3491049,3491070  
46350446,46350450  
6395295,6550037  
1783831,1605075  
4480981,4480982  
313285,313304  
139586875,139586877  
11445874,11446047  
111758321,111758395  
62272710,62275844  
89896778,89896790  
17597619,17597680  
16534807,16541659  
135488850,135488851  
31847859,31877801  
140788372,140807269  
22160708,22160709  
62037969,62051639  
33021466,33021467  
4255008,4268340  
100538092,100819625  
151439827,151488536  
77963146,77927325  
34728930,34728972  
1151618,1151619  
41570300,41570301  
68038697,68045840  
69205759,70252488  
73717919,73717930  
140788372,140807269  
76113870,76118451  
121191208,121213135  
45565093,45565384  
114421601,114421603

31712393,32003768  
128944079,128944080  
9820694,9820695  
129822490,129822550  
113432010,113493183  
5570219,5570220  
57823683,57877048  
113641483,113705683  
134202850,134203177  
140788372,140807269  
23673127,23780424  
8120507,8124738  
137288499,137308241  
25757326,25757327  
77241309,77241355  
504920,536685  
1829088,1790861  
140262339,140296614  
140788372,140807269  
101151382,101226215  
2522390,2522391  
150194484,150202102  
136654651,136690328  
16787669,16787670  
204417023,204435089  
55136397,55233088  
1663742,1664033  
41400561,41400562  
47469946,47469947  
140788372,140807269  
91265664,91265665  
5772602,5806852  
69656327,69656328  
4419898,4426377  
48597192,48589244  
69493317,69493318  
90229685,90143574  
105622189,105622204  
4106009,3544294  
140788372,140807269  
133096969,133098433  
76533188,76533216  
138731842,138731967



140788372,140807269  
39496742,39496901  
88763894,88763956  
77246977,77249039  
140414409,140414410  
25441432,25441935  
19440536,19440537  
6224779,6224826  
25262289,25274317  
140788372,140807269  
100621403,100621419  
236613477,236724860  
65157855  
119594662  
44812007  
952271  
30161133  
154149462  
236361171  
34989161  
9410990  
57986974  
72614418  
62729677  
5079239  
2581250  
198820472  
241902718  
37035922  
3841541  
63907397  
34038644  
918504  
33323126  
98650049  
133541575  
2938160  
56465885  
49022891  
12599343  
58716019  
673429  
141721306

58713589  
73580257  
134942004  
128619357  
129145448  
86318399  
21337794  
215867783  
243837047  
120270180  
39631463  
98907527  
91428778  
156935591  
37737033  
111901451  
687110  
93154380  
119291420  
12268535  
68311865  
18274134  
140222350  
32018563  
2803226  
73752970  
154674748  
34444494  
88443652  
30173543  
46715539  
76762264  
83137010  
35084200  
53922182  
152859642  
91486304  
42568439  
47399600  
75639854  
113705683  
16561951  
68831858

139273402  
16376190  
1023891  
189763772  
117978303  
140682400  
43766753  
37935946  
72956122  
57777008  
140615827  
9447487  
119206373  
59938978  
26899124  
44277261  
49232224  
45068112  
31429353  
36254490  
180540908  
128916713  
1422709  
67409909  
53770814  
72472674  
43457167  
76859102  
36789201  
22069818  
432779  
43620580  
131077590  
28476462  
64331566  
60955209  
55521935  
132884828  
157913475  
126225822  
64680773  
42910374  
30649907

48645334  
79070181  
65347404  
95375286  
76160100  
1861492  
22456323  
107288930  
767105  
43101270  
110685597  
68231843  
10278677  
3209132  
20255943  
1590616  
98929283  
118311097  
62574746  
89832847  
979672  
62627695  
24678571  
140807269  
31217110  
46718264  
179243791  
140222350  
23403376  
71010391  
109644356  
78032915  
15127628  
41755837  
22168216  
29882489  
104728336  
81192339  
23155335  
3543396  
70793980  
127064945  
134681693

30747191  
140222350  
9722333  
73888095  
4512512  
122683532  
34006768  
61721930  
64579832  
226900342  
9480685  
56538930  
163731500  
18997664  
22641335  
20408076  
176484225  
10258158  
74834623  
58914418  
47813211  
34038644  
33355891  
118477650  
151523711  
127510897  
56015672  
7013945  
47328930  
38440492  
88916849  
134162865  
111125932  
31546903  
140983143  
16249658  
3508341  
53350837  
44299780  
197887465  
123784929  
90651140  
103346178

48944756  
39400107  
130935502  
178557292  
113186774  
3615255  
51602748  
77329076  
48494366  
112899507  
35176265  
83977812  
107459431  
55874316  
602593  
6395295  
22328279  
103354182  
433963  
37705532  
43296117  
888631  
56621183  
62782795  
73985072  
9956277  
130313341  
5618072  
140807269  
8592201  
135716507  
14085185  
79066807  
55874093  
195255815  
163731500  
105439493  
10478725  
166962928  
47311929  
3406158  
30647663  
40692303

8094724  
219328681  
76617529  
5841576  
2949569  
11749457  
121301342  
10081758  
70570289  
179336995  
46008789  
116080559  
108011588  
35310696  
41655391  
114521627  
28884473  
16643798  
24201542  
22287860  
97903605  
68773801  
48192159  
1871883  
53649062  
609067  
3147079  
111249995  
1955747  
21871934  
17388936  
217547580  
70698846  
63892510  
92562824  
133186770  
79701971  
5152786  
28301339  
107243558  
33366102  
53579582  
133378706

118633321  
29129929  
26192088  
89203992  
76382861  
50318505  
64516736  
112770132  
151850684  
120012170  
42950345  
46784615  
60018852  
162947410  
91024464  
140222350  
28720328  
132688049  
25755379  
51189914  
1222300  
134136246  
36430558  
4008050  
41839713  
75556982  
11166825  
6440655  
74759030  
156105927  
71118582  
74944932  
80829706  
94580212  
133608347  
61973910  
186697926  
373029  
21872002  
98929283  
140807269  
1036442  
90558962



64066998  
125593092  
36893856  
17461532  
151550229  
133593354  
86792328  
15722674  
66130534  
105167585  
36276085  
165819656  
120282340  
16467522  
3458178  
46751994  
41752746  
64212416  
57037918  
129050105  
124922447  
21001667  
96517838  
90001561  
195535322  
25399473  
3774936  
34941955  
88797567  
48444200  
536685  
245393901  
45878121  
237119116  
94532063  
44585591  
1998462  
166866088  
8869271  
9880690  
29344689  
1270631  
40624656

22499723  
16746656  
55963884  
170060146  
45123954  
56041151  
2257490  
90958169  
122282514  
139361082  
85579680  
47225789  
152193232  
10090322  
43529312  
3705115  
32677157  
123536724  
51274704  
990952  
115810349  
44305058  
124786052  
115928020  
32696485  
5544317  
102733210  
10205325  
131977644  
111901451  
73981568  
18563878  
129743452  
13430489  
89732964  
140621746  
210575775  
86288655  
1484931  
228491298  
42129924  
117487268  
73650292

13898560  
63627263  
144789020  
86280873  
131749076  
148407893  
50754654  
148591549  
47753493  
65269045  
66282150  
94032576  
19656225  
153883975  
71703497  
30824169  
61869501  
153033059  
581193  
10370470  
55870060  
180043387  
66606894  
62301969  
23018551  
103417023  
140222350  
76562258  
64281902  
3544294  
71896671  
2048994  
165567324  
134252876  
46557820  
99879495  
99656046  
70882884  
89418325  
93413384  
145895077  
144297310  
75444572

62125889  
175265168  
17228366  
231318322  
89897387  
32299595  
44844590  
169362200  
50636964  
77943467  
84687730  
19606632  
75528578  
127794978  
5937167  
11764920  
27491291  
176011887  
44770845  
70622410  
101120187  
98885556  
19583733  
148866434  
531139  
36062862  
274107  
46917064  
4714138  
50700334  
45970468  
796429  
44152788  
60704417  
2160493  
19816727  
40338642  
110021005  
134169431  
46948159  
170698346  
76185796  
38283294

72411996  
58516382  
21526087  
58060536  
111565937  
49331268  
75175652  
21687649  
55136397  
8449259  
2942171  
119617173  
18735411  
47086345  
178294555  
32403722  
30824169  
5817337  
42174224  
122737256  
18725048  
154805692  
55220020  
2090468  
140160085  
36260913  
51593265  
1605075  
131521885  
13350430  
33368549  
19617234  
6063386  
39169388  
106878735  
140222350  
27138950  
77714245  
7223662  
176830177  
27423226  
73408419  
41817493

68277200  
31353415  
97353470  
42923485  
78969375  
74102054  
19239431  
49801057  
140222350  
59558945  
63680719  
114496429  
2318693  
75649357  
161624564  
46872414  
15756328  
12617688  
108953166  
974048  
75484000  
159797248  
62301969  
4793989  
33833761  
129827032  
152613111  
10765091  
138745176  
90808933  
66099987  
38590138  
12507917  
183101302  
62193018  
150746310  
6095983  
1783831  
22079226  
2829476  
21010306  
241663687  
18785125

242793508  
54198305  
27867706  
13943913  
3543396  
18565703  
176765393  
52947803  
72784649  
123678613  
99640948  
40380587  
38935856  
95845082  
155552218  
143810693  
78971536  
222704637  
122181796  
114888534  
37159436  
29003195  
110282391  
194846096  
51834536  
35043780  
139652104  
79862481  
16987255  
141995076  
133788407  
103269465  
104027332  
31430008  
61470544  
22851631  
3670879  
10513220  
123409692  
64986648  
122430537  
45827018  
187246888

2428172  
183888585  
21330991  
98131430  
10368148  
21233958  
89657290  
57593100  
114555065  
106500939  
71178224  
8541602  
110600567  
43368571  
33906883  
30936612  
101464829  
27152130  
132222754  
7594158  
22240852  
57969591  
20672356  
203457476  
2128343  
27895885  
40629129  
45858245  
77674633  
38135045  
107591673  
38503968  
118219848  
56947979  
42837883  
128048976  
63885704  
5020748  
134406067  
7917074  
32906450  
33474740  
91666017



114834256  
54544926  
53906925  
5683649  
116730736  
43689840  
59064635  
25793412  
74657603  
151510622  
127439661  
6451750  
133014095  
133618368  
57697568  
33743120  
113066405  
54933103  
3446132  
11648225  
55917965  
158735594  
5696960  
72796787  
165715903  
47242311  
43017917  
37696914  
64103745  
62106264  
140788372  
7619327  
5750693  
111321250  
99879495  
110867863  
22985150  
9637960  
61489619  
140930848  
60969884  
140222350  
22385728

48950880  
3650014  
3839683  
6735929  
2776981  
812667  
60620514  
217505468  
45281758  
20394006  
77333576  
44639920  
30666367  
80855968  
902246  
7023986  
31557150  
57283261  
13213728  
1354210  
1262966  
73406357  
69061737  
128340901  
41020166  
3578581  
39450360  
15263009  
51336091  
509895  
166057748  
145200513  
26790062  
98251544  
131195162  
109066797  
45968603  
241402331  
79118601  
3473314  
140807269  
2089525  
140330322

69205759  
4817150  
99094068  
77662247  
61041905  
230848701  
30760231  
51045155  
19964097  
3032180  
5263713  
38157013  
33122180  
67361031  
42296341  
110862302  
960712  
92531461  
15445059  
47406934  
35391786  
39609804  
44937379  
9449977  
145252482  
89764547  
887433  
79444248  
1917127  
155939304  
31693693  
66282150  
24507010  
139265732  
120251508  
74723439  
30215667  
132798399  
32647982  
57677894  
119236750  
73669104  
50015965

17474143  
3649499  
73985072  
84463851  
32134240  
39193336  
30122278  
1100693  
133906248  
13934492  
4083219  
72083976  
33887335  
125243050  
109793152  
45443289  
14829748  
17339225  
23741514  
8379486  
65679047  
47611546  
63892510  
61825764  
77707454  
85997810  
943538  
155939304  
155893119  
1482680  
186208714  
135813566  
179267474  
43161803  
62990409  
233151171

:1,49146195,49146358,49146361,49146370,48943431  
i1,49146370  
9,241497398,241497404  
3,158281485

| <b>Gene name</b> | <b>number of high covari</b> | <b>chromosome</b> | <b>site locations</b> |
|------------------|------------------------------|-------------------|-----------------------|
| LOC286467        | 11                           | chrX              | 130854398,130854407   |
| PIEZO1           | 10                           | chr16             | 88804190,88811168,8   |
| PTPRN2           | 9                            | chr7              | 157606110,157641939   |
| FAM19A5          | 9                            | chr22             | 49146297,49146298,4   |
| ANTXR2           | 8                            | chr4              | 80885897,80885910,8   |
| FAM19A5          | 8                            | chr22             | 49146297,49146298,4   |
| PARD6G-AS1       | 8                            | chr18             | 77918010,77918012,7   |
| LARGE            | 7                            | chr22             | 33834610,33834624,3   |
| PRKCZ            | 7                            | chr1              | 2040761,2040776,204   |
| CSMD1            | 7                            | chr8              | 4441842,3828373,382   |
| PARD6G           | 7                            | chr18             | 77918010,77918012,7   |
| RPL23AP53        | 7                            | chr8              | 179561,179588,17961   |
| FGF13            | 6                            | chrX              | 138054754,138085209   |
| CUX1             | 5                            | chr7              | 101464829,101694275   |
| CACNA1H          | 5                            | chr16             | 1207514,1211221,121   |
| SLC36A1          | 5                            | chr5              | 150834304,150834312   |
| OPLAH            | 5                            | chr8              | 145106687,145106712   |
| ZNF664-FAM101A   | 5                            | chr12             | 124590414,124642802   |
| WDSUB1           | 5                            | chr2              | 160101991,160102680   |
| JAG2             | 5                            | chr14             | 105622204,105622216   |
| COL23A1          | 5                            | chr5              | 177741111,177808674   |
| RBFOX1           | 5                            | chr16             | 6459345,7307250,712   |
| ANO2             | 5                            | chr12             | 5998343,5998344,599   |
| CDH4             | 5                            | chr20             | 60422230,60450242,5   |
| SH2B2            | 5                            | chr7              | 101944202,101944208   |
| KIF26B           | 5                            | chr1              | 245381025,245681000   |
| VAV2             | 5                            | chr9              | 136778878,136789528   |
| NXN              | 4                            | chr17             | 743982,846798,81306   |
| CTBP1            | 4                            | chr4              | 1222301,1224540,122   |
| LAMA5            | 4                            | chr20             | 60907895,60926221,6   |
| FBRSL1           | 4                            | chr12             | 133144691,133072654   |
| MACROD2          | 4                            | chr20             | 14423493,14634110,1   |
| CARD11           | 4                            | chr7              | 2953432,2962751,296   |
| DAGLA            | 4                            | chr11             | 61511261,61456424,6   |
| ME1              | 4                            | chr6              | 84140723,84140735,8   |
| C1orf65          | 4                            | chr1              | 223566798,223566800   |
| ZIC3             | 4                            | chrX              | 136648350,136648374   |
| RBFOX1           | 4                            | chr16             | 7307250,7126103,741   |
| LMF1             | 4                            | chr16             | 1012567,945450,9665   |
| SHANK2           | 4                            | chr11             | 70438054,70425842,7   |
| MAGIX            | 4                            | chrX              | 49022855,49022886,4   |
| CDH4             | 4                            | chr20             | 60422230,60450242,6   |

|           |   |       |                     |
|-----------|---|-------|---------------------|
| BCL11B    | 4 | chr14 | 99679658,99680040,9 |
| GPR133    | 3 | chr12 | 131519660,131521885 |
| UGT1A8    | 3 | chr2  | 234633332,234663626 |
| GABRB3    | 3 | chr15 | 26915571,26915677,2 |
| UGT1A4    | 3 | chr2  | 234633332,234663626 |
| CCDC154   | 3 | chr16 | 1493030,1493097,149 |
| UGT1A6    | 3 | chr2  | 234633332,234663626 |
| RPGR      | 3 | chrX  | 38157241,38157285,3 |
| ZNF282    | 3 | chr7  | 148904623,148904794 |
| KANSL1    | 3 | chr17 | 44220941,44286088,4 |
| ATP10A    | 3 | chr15 | 25978503,25978810,2 |
| COLEC11   | 3 | chr2  | 3644890,3645428,364 |
| SYNPR     | 3 | chr3  | 63269640,63269641,6 |
| KIF1A     | 3 | chr2  | 241661551,241687530 |
| COTL1     | 3 | chr16 | 84608934,84615224,8 |
| SMOC2     | 3 | chr6  | 168928224,168842930 |
| DLEU7-AS1 | 3 | chr13 | 51417534,51417569,5 |
| HDGFRP2   | 3 | chr19 | 4490302,4490332,449 |
| CNOT1     | 3 | chr16 | 58560322,58610256,5 |
| AKAP14    | 3 | chrX  | 119046140,119046173 |
| NFATC1    | 3 | chr18 | 77202644,77202645,7 |
| MCF2L     | 3 | chr13 | 113739124,113693327 |
| CLASP1    | 3 | chr2  | 122106474,122350965 |
| SLITRK2   | 3 | chrX  | 144902902,144902965 |
| BAIAP2    | 3 | chr17 | 79042974,79063592,7 |
| RBFOX3    | 3 | chr17 | 77295082,77295090,7 |
| DMD       | 3 | chrX  | 31912609,32603677,3 |
| SURF6     | 3 | chr9  | 136199464,136199465 |
| CDC42BPB  | 3 | chr14 | 103477426,103477432 |
| CEP112    | 3 | chr17 | 63904583,63904587,6 |
| PCSK6     | 3 | chr15 | 101903335,101915394 |
| UGT1A10   | 3 | chr2  | 234633332,234663626 |
| CLCN7     | 3 | chr16 | 1497136,1505429,150 |
| ARHGEF10L | 3 | chr1  | 17958855,17958868,1 |
| NTM       | 3 | chr11 | 131638085,132058408 |
| PRKAR1B   | 3 | chr7  | 752407,752449,75246 |
| GPHN      | 3 | chr14 | 67139912,67142112,6 |
| UGT1A9    | 3 | chr2  | 234633332,234663626 |
| DLEU7     | 3 | chr13 | 51417534,51417569,5 |
| PGS1      | 3 | chr17 | 76400505,76400506,7 |
| PIK3R5    | 3 | chr17 | 8789358,8812825,881 |
| ATP11A    | 3 | chr13 | 113362104,113398928 |
| ADAMTS17  | 3 | chr15 | 100514524,100562966 |

|          |   |       |                     |
|----------|---|-------|---------------------|
| MOB2     | 3 | chr11 | 1523346,1777815,177 |
| UGT1A5   | 3 | chr2  | 234633332,234663626 |
| KIAA1755 | 3 | chr20 | 36849007,36849086,3 |
| AGAP1    | 3 | chr2  | 236754256,236847317 |
| RPS6KA2  | 3 | chr6  | 166843822,166946143 |
| ADARB2   | 3 | chr10 | 1382459,1643950,159 |
| EYS      | 3 | chr6  | 65216632,66134639,6 |
| GALNTL6  | 3 | chr4  | 173103159,173030020 |
| LRP3     | 3 | chr19 | 33696342,33696372,3 |
| CBFA2T3  | 3 | chr16 | 89042615,88953882,8 |
| UGT1A7   | 3 | chr2  | 234633332,234663626 |
| PRKAG2   | 3 | chr7  | 151393353,151398709 |
| GAS7     | 3 | chr17 | 9820694,9820695,100 |
| RPTOR    | 3 | chr17 | 78847067,78884949,7 |
| HDAC4    | 3 | chr2  | 240170032,240170078 |
| DIP2C    | 3 | chr10 | 444996,418675,64496 |
| RYR1     | 3 | chr19 | 38949505,38956801,3 |
| SORCS1   | 3 | chr10 | 108370663,108554540 |
| TMEM184A | 3 | chr7  | 1585243,1587041,158 |
| PXDN     | 2 | chr2  | 1681482,1664033     |
| NOTCH1   | 2 | chr9  | 139389767,139424016 |
| PRKX     | 2 | chrX  | 3570186,3621933     |
| GNAZ     | 2 | chr22 | 23438616,23441116   |
| SULF2    | 2 | chr20 | 46317257,46317267   |
| FRMPD4   | 2 | chrX  | 12368726,12602043   |
| PCDHA1   | 2 | chr5  | 140222356,140233651 |
| CSNK1G2  | 2 | chr19 | 1953636,1954126     |
| PHKA2    | 2 | chrX  | 18934349,18934350   |
| KIAA1217 | 2 | chr10 | 24516752,24832885   |
| ZFR2     | 2 | chr19 | 3819891,3827732     |
| HIPK3    | 2 | chr11 | 33304906,33304907   |
| SGMS1    | 2 | chr10 | 52131940,52131991   |
| ABCC5    | 2 | chr3  | 183713815,183713816 |
| HRAS     | 2 | chr11 | 533035,533036       |
| RBFOX1   | 2 | chr16 | 7418191,7660583     |
| ANO1     | 2 | chr11 | 69971133,69979164   |
| CACNA1I  | 2 | chr22 | 40082534,40082538   |
| CAMTA1   | 2 | chr1  | 7633798,7742833     |
| ITPR2    | 2 | chr12 | 26924516,26511135   |
| REEP1    | 2 | chr2  | 86545739,86545740   |
| TMEM132C | 2 | chr12 | 129028623,129084727 |
| C3orf33  | 2 | chr3  | 155505796,155505807 |
| TRPC5    | 2 | chrX  | 111149356,111149440 |



|              |   |       |                     |
|--------------|---|-------|---------------------|
| SLC12A5      | 2 | chr20 | 44686590,44686635   |
| TTL6         | 2 | chr17 | 46855467,46879962   |
| RYR3         | 2 | chr15 | 33609541,33652116   |
| TBC1D8       | 2 | chr2  | 101654460,101761168 |
| SNX8         | 2 | chr7  | 2291790,2293508     |
| CACNA1D      | 2 | chr3  | 53534199,53784558   |
| PCDHA3       | 2 | chr5  | 140222356,140233651 |
| AP3D1        | 2 | chr19 | 2131565,2131578     |
| LOC100873065 | 2 | chrX  | 22352538,22825509   |
| SNX29        | 2 | chr16 | 12174662,12184064   |
| NPRL3        | 2 | chr16 | 177853,178051       |
| ZRANB3       | 2 | chr2  | 136030518,136213285 |
| LOC100132273 | 2 | chr22 | 42492062,42492104   |
| PARK2        | 2 | chr6  | 162441931,162693582 |
| STARD8       | 2 | chrX  | 67937492,67942325   |
| CAPG         | 2 | chr2  | 85640633,85640650   |
| MYO7B        | 2 | chr2  | 128340901,128367090 |
| BTBD9        | 2 | chr6  | 38520370,38520371   |
| NCOR2        | 2 | chr12 | 124826676,124860830 |
| ONECUT2      | 2 | chr18 | 55138245,55105945   |
| CTBP2        | 2 | chr10 | 126719831,126719832 |
| CRISPLD2     | 2 | chr16 | 84872049,84887563   |
| MMEL1        | 2 | chr1  | 2522201,2522203     |
| FLJ12825     | 2 | chr12 | 54500278,54500355   |
| PRDM16       | 2 | chr1  | 3320520,3110954     |
| BRSK2        | 2 | chr11 | 1435516,1447686     |
| IL1RAP       | 2 | chr3  | 190352746,190352783 |
| SH2D4B       | 2 | chr10 | 82360631,82360632   |
| FRMD1        | 2 | chr6  | 168474308,168479602 |
| LMX1B        | 2 | chr9  | 129379371,129379379 |
| EMR1         | 2 | chr19 | 6899501,6899521     |
| SH3BGR       | 2 | chr21 | 40823879,40823888   |
| RNF128       | 2 | chrX  | 106007255,106007285 |
| RBKS         | 2 | chr2  | 28063222,28063226   |
| PNKD         | 2 | chr2  | 219186591,219146078 |
| EIF4G3       | 2 | chr1  | 21134595,21134596   |
| SLC7A5       | 2 | chr16 | 87867223,87871580   |
| ZFPM2        | 2 | chr8  | 106488511,106488515 |
| MRPL48       | 2 | chr11 | 73508796,73523222   |
| LHPP         | 2 | chr10 | 126208561,126290561 |
| CEP68        | 2 | chr2  | 65289622,65289948   |
| CRLF1        | 2 | chr19 | 18706287,18706503   |
| NTM          | 2 | chr11 | 132058408,132058411 |

|              |   |       |                     |
|--------------|---|-------|---------------------|
| ATP2C2       | 2 | chr16 | 84468325,84469995   |
| DSCAML1      | 2 | chr11 | 117544836,117566161 |
| PIK3C2B      | 2 | chr1  | 204417023,204436065 |
| RNU6-71      | 2 | chr6  | 56173941,56174087   |
| CTSD         | 2 | chr11 | 1777815,1778321     |
| TTC40        | 2 | chr10 | 134681693,134623694 |
| KCND3        | 2 | chr1  | 112525024,112525031 |
| AP2A2        | 2 | chr11 | 984420,1001560      |
| ARFGEF1      | 2 | chr8  | 68118794,68223105   |
| CYFIP1       | 2 | chr15 | 22896102,22912140   |
| LRCOL1       | 2 | chr12 | 133186812,133186827 |
| SLC24A3      | 2 | chr20 | 19222060,19222104   |
| DAPK3        | 2 | chr19 | 3966518,3960019     |
| MICAL3       | 2 | chr22 | 18281728,18398207   |
| CSNK1G2-AS1  | 2 | chr19 | 1953636,1954126     |
| PCNXL2       | 2 | chr1  | 233399443,233399444 |
| HELB         | 2 | chr12 | 66733266,66733338   |
| MIR548AN     | 2 | chr13 | 99977592,100043086  |
| GPR132       | 2 | chr14 | 105518054,105518091 |
| PCDHA8       | 2 | chr5  | 140222356,140233651 |
| ZNF579       | 2 | chr19 | 56090276,56090305   |
| CLYBL        | 2 | chr13 | 100260559,100260560 |
| OSBPL5       | 2 | chr11 | 3167118,3172171     |
| TSNARE1      | 2 | chr8  | 143313650,143358298 |
| PCDHA5       | 2 | chr5  | 140222356,140233651 |
| C2orf83      | 2 | chr2  | 228491298,228491315 |
| VDR          | 2 | chr12 | 48257325,48257326   |
| RPF2         | 2 | chr6  | 111342297,111313236 |
| CNTNAP5      | 2 | chr2  | 125119759,125398121 |
| FAM83A       | 2 | chr8  | 124219472,124219544 |
| MSRA         | 2 | chr8  | 10225240,9949277    |
| MCPH1        | 2 | chr8  | 6365738,6465694     |
| RXRA         | 2 | chr9  | 137225217,137288499 |
| THAP4        | 2 | chr2  | 242547301,242555315 |
| SNF8         | 2 | chr17 | 47009568,47010007   |
| LOC100286922 | 2 | chr2  | 234663626,234663653 |
| DOK6         | 2 | chr18 | 67361019,67361031   |
| TAF1C        | 2 | chr16 | 84212777,84212710   |
| BCOR         | 2 | chrX  | 39933047,39938587   |
| MYOM2        | 2 | chr8  | 2024656,2045514     |
| LOC732275    | 2 | chr16 | 86368525,86369306   |
| STK40        | 2 | chr1  | 36807480,36810010   |
| CNOT1        | 2 | chr16 | 58610256,58610257   |

|                |   |       |                     |
|----------------|---|-------|---------------------|
| C1QL3          | 2 | chr10 | 16561939,16561955   |
| STIM1          | 2 | chr11 | 3936650,3982840     |
| CACNA1G        | 2 | chr17 | 48677083,48689799   |
| TYW1           | 2 | chr7  | 66479904,66479905   |
| TMEM132D       | 2 | chr12 | 130342963,129888938 |
| ZMAT4          | 2 | chr8  | 40707694,40518778   |
| ARHGEF10       | 2 | chr8  | 1790861,1813891     |
| PCDHA7         | 2 | chr5  | 140222356,140233651 |
| FBLN1          | 2 | chr22 | 45978046,45981447   |
| ERICH1-AS1     | 2 | chr8  | 872324,1042396      |
| ASAP1          | 2 | chr8  | 131069818,131427223 |
| ZNF76          | 2 | chr6  | 35260502,35260529   |
| ADCY9          | 2 | chr16 | 4027604,4027605     |
| PCDHA4         | 2 | chr5  | 140222356,140233651 |
| HAUS7          | 2 | chrX  | 152746484,152746485 |
| VPRBP          | 2 | chr3  | 51531473,51531495   |
| NLRP2          | 2 | chr19 | 55494187,55495378   |
| DLGAP2         | 2 | chr8  | 1455439,1478196     |
| KCNK17         | 2 | chr6  | 39271537,39271538   |
| SBNO2          | 2 | chr19 | 1122146,1164139     |
| KAZN           | 2 | chr1  | 15127623,15294191   |
| UGT1A3         | 2 | chr2  | 234663626,234663653 |
| MRPL45P2       | 2 | chr17 | 45565093,45565384   |
| CBFA2T3        | 2 | chr16 | 88953882,88962816   |
| RTDR1          | 2 | chr22 | 23438616,23441116   |
| C20orf85       | 2 | chr20 | 56732799,56733571   |
| ATG4B          | 2 | chr2  | 242584161,242610500 |
| LOC100505817   | 2 | chr18 | 71010480,71010484   |
| INPP5A         | 2 | chr10 | 134372679,134372680 |
| GAS7           | 2 | chr17 | 9820694,9820695     |
| XKR6           | 2 | chr8  | 10910862,10966569   |
| ARHGAP19-SLIT1 | 2 | chr10 | 99047710,99047711   |
| RASA3          | 2 | chr13 | 114802859,114880846 |
| FAM86HP        | 2 | chr3  | 129822490,129822550 |
| PLXNA4         | 2 | chr7  | 131815652,132187312 |
| IL6R           | 2 | chr1  | 154416933,154416934 |
| EYS            | 2 | chr6  | 66134639,66166067   |
| ZDHHC19        | 2 | chr3  | 195925355,195933370 |
| PCDHA2         | 2 | chr5  | 140222356,140233651 |
| ELP6           | 2 | chr3  | 47547663,47547664   |
| TRPM7          | 2 | chr15 | 50935282,50935283   |
| FAM213B        | 2 | chr1  | 2522201,2522203     |
| KIF17          | 2 | chr1  | 21035108,21043852   |

|              |   |       |                     |
|--------------|---|-------|---------------------|
| PLEKHA6      | 2 | chr1  | 204219848,204219849 |
| ZBTB46       | 2 | chr20 | 62380327,62432152   |
| KIAA1751     | 2 | chr1  | 1886588,1898937     |
| PCSK6        | 2 | chr15 | 101915394,101924537 |
| WDR4         | 2 | chr21 | 44280703,44290375   |
| LRP1B        | 2 | chr2  | 141294992,142022629 |
| BIN1         | 2 | chr2  | 127860879,127861446 |
| ANP32E       | 2 | chr1  | 150194484,150202102 |
| TPST2        | 2 | chr22 | 26948220,26982357   |
| NEK6         | 2 | chr9  | 127105254,127048907 |
| GRM3         | 2 | chr7  | 86323612,86457243   |
| FTSJ1        | 2 | chrX  | 48339984,48339985   |
| EPB41L4A     | 2 | chr5  | 111696502,111696538 |
| RTL1         | 2 | chr14 | 101349763,101349172 |
| SIPA1L3      | 2 | chr19 | 38617389,38627237   |
| PLOD3        | 2 | chr7  | 100851242,100851243 |
| ASPG         | 2 | chr14 | 104562750,104562791 |
| C16orf45     | 2 | chr16 | 15528789,15636155   |
| LOC100129138 | 2 | chr1  | 104615880,104615885 |
| MMRN2        | 2 | chr10 | 88703284,88703316   |
| MLLT1        | 2 | chr19 | 6213311,6213321     |
| FLI1         | 2 | chr11 | 128611281,128611282 |
| PDZD4        | 2 | chrX  | 153068854,153073318 |
| C14orf159    | 2 | chr14 | 91609462,91609532   |
| LCMT1        | 2 | chr16 | 25187609,25144907   |
| PCDHA6       | 2 | chr5  | 140222356,140233651 |
| KDM4C        | 2 | chr9  | 6793789,7147974     |
| YWHAE        | 2 | chr17 | 1252535,1252536     |
| AHRR         | 2 | chr5  | 355048,407802       |
| ELFN1        | 2 | chr7  | 1784084,1784838     |
| USP8         | 2 | chr15 | 50731843,50752566   |
| RBM19        | 2 | chr12 | 114255319,114255320 |
| CACNB4       | 2 | chr2  | 152864956,152874593 |
| ARHGAP19     | 2 | chr10 | 99047710,99047711   |
| MND1         | 2 | chr4  | 154300829,154302293 |
| PXDNL        | 2 | chr8  | 52317473,52317474   |
| LEMD2        | 2 | chr6  | 33742192,33742193   |
| ZSCAN1       | 2 | chr19 | 58552731,58545712   |
| DYSF         | 2 | chr2  | 71797711,71692546   |
| PACSIN2      | 2 | chr22 | 43274720,43324183   |
| DCHS2        | 2 | chr4  | 155410665,155410924 |
| CTNNA2       | 2 | chr2  | 80286635,79914706   |
| POLR2A       | 2 | chr17 | 7405073,7411770     |

|           |   |       |                     |
|-----------|---|-------|---------------------|
| TRAPPC9   | 2 | chr8  | 141200417,141269708 |
| AUNIP     | 1 | chr1  | 26180431            |
| KDM1B     | 1 | chr6  | 18158286            |
| NR1H4     | 1 | chr12 | 100953546           |
| GRAMD1A   | 1 | chr19 | 35502532            |
| SPTBN4    | 1 | chr19 | 41050290            |
| SNRPN     | 1 | chr15 | 25196084            |
| CYP11B1   | 1 | chr8  | 143957579           |
| GPR137B   | 1 | chr1  | 236361171           |
| RPS6KB1   | 1 | chr17 | 57986974            |
| TMBIM6    | 1 | chr12 | 50153676            |
| ARRB2     | 1 | chr17 | 4622638             |
| CCNG1     | 1 | chr5  | 162870234           |
| DOT1L     | 1 | chr19 | 2187851             |
| EPG5      | 1 | chr18 | 43522083            |
| BCL2      | 1 | chr18 | 60816889            |
| CANX      | 1 | chr5  | 179145862           |
| TEAD4     | 1 | chr12 | 3128415             |
| KLHL13    | 1 | chrX  | 117245441           |
| CCT5      | 1 | chr5  | 10253162            |
| PDE6B     | 1 | chr4  | 619634              |
| UBAC1     | 1 | chr9  | 138831135           |
| MTRF1L    | 1 | chr6  | 153311755           |
| FUT10     | 1 | chr8  | 33323126            |
| HCN2      | 1 | chr19 | 607040              |
| C20orf196 | 1 | chr20 | 5741195             |
| DGKG      | 1 | chr3  | 186077900           |
| N4BP3     | 1 | chr5  | 177546160           |
| WDR59     | 1 | chr16 | 74993426            |
| SLC29A1   | 1 | chr6  | 44198397            |
| CD97      | 1 | chr19 | 14506631            |
| DHTKD1    | 1 | chr10 | 12156554            |
| ERI3      | 1 | chr1  | 44780321            |
| KCNAB2    | 1 | chr1  | 6143145             |
| LINC00661 | 1 | chr19 | 16126820            |
| GRK1      | 1 | chr13 | 114432861           |
| ZFP57     | 1 | chr6  | 29644039            |
| KLF11     | 1 | chr2  | 10191713            |
| SORL1     | 1 | chr11 | 121357434           |
| LRP5      | 1 | chr11 | 68201295            |
| IGSF23    | 1 | chr19 | 45124734            |
| MYH7      | 1 | chr14 | 23896981            |
| CCDC85C   | 1 | chr14 | 100026843           |

|                |   |       |           |
|----------------|---|-------|-----------|
| GMPR           | 1 | chr6  | 16251571  |
| NUGGC          | 1 | chr8  | 27886902  |
| CALCOCO2       | 1 | chr17 | 46936153  |
| ZNF812         | 1 | chr19 | 9804096   |
| CDC123         | 1 | chr10 | 12268535  |
| TACC2          | 1 | chr10 | 123814472 |
| GTPBP3         | 1 | chr19 | 17452744  |
| HSPB2-C11orf52 | 1 | chr11 | 111784923 |
| FOXF1          | 1 | chr16 | 86547385  |
| PRICKLE2       | 1 | chr3  | 64183682  |
| BOLA3          | 1 | chr2  | 74368577  |
| SDCCAG8        | 1 | chr1  | 243600962 |
| IL1RAPL1       | 1 | chrX  | 29547567  |
| UGGT2          | 1 | chr13 | 96580857  |
| ALDH1A3        | 1 | chr15 | 101436140 |
| STOX2          | 1 | chr4  | 184848069 |
| POLR3K         | 1 | chr16 | 102638    |
| IQSEC2         | 1 | chrX  | 53272073  |
| PREX1          | 1 | chr20 | 47325314  |
| TM9SF4         | 1 | chr20 | 30729523  |
| FAM133A        | 1 | chrX  | 92952059  |
| ZNF213         | 1 | chr16 | 3192535   |
| SRCIN1         | 1 | chr17 | 36718828  |
| CRB2           | 1 | chr9  | 126129406 |
| C6orf123       | 1 | chr6  | 168185593 |
| ELOVL6         | 1 | chr4  | 111114534 |
| WAC            | 1 | chr10 | 28899099  |
| MLL3           | 1 | chr7  | 151998404 |
| NTSR2          | 1 | chr2  | 11809846  |
| PLA2G4B        | 1 | chr15 | 42135988  |
| OCLN           | 1 | chr5  | 68831858  |
| ALPL           | 1 | chr1  | 21892980  |
| FLG            | 1 | chr1  | 152286040 |
| C1QTNF6        | 1 | chr22 | 37578578  |
| CNTN2          | 1 | chr1  | 205018621 |
| PKNOX2         | 1 | chr11 | 125169732 |
| DHX38          | 1 | chr16 | 72137560  |
| NOL4           | 1 | chr18 | 31767641  |
| ANKS1B         | 1 | chr12 | 100040303 |
| EP400          | 1 | chr12 | 132558689 |
| GPC3           | 1 | chrX  | 132763656 |
| BOC            | 1 | chr3  | 112991312 |
| COL6A1         | 1 | chr21 | 47421793  |

|           |   |       |           |
|-----------|---|-------|-----------|
| PI4KA     | 1 | chr22 | 21196897  |
| GRIN1     | 1 | chr9  | 140059456 |
| CAMK2B    | 1 | chr7  | 44259325  |
| UPK1A     | 1 | chr19 | 36168150  |
| ZNF516    | 1 | chr18 | 74097118  |
| CNOT6     | 1 | chr5  | 179962178 |
| CNTN4     | 1 | chr3  | 2348890   |
| CDK16     | 1 | chrX  | 47086345  |
| SSTR5-AS1 | 1 | chr16 | 1124965   |
| KIAA1609  | 1 | chr16 | 84514963  |
| TECRL     | 1 | chr4  | 65221244  |
| AGPAT3    | 1 | chr21 | 45386749  |
| LOC440335 | 1 | chr16 | 4846334   |
| ST3GAL1   | 1 | chr8  | 134494941 |
| FZR1      | 1 | chr19 | 3533273   |
| PRSS42    | 1 | chr3  | 46875041  |
| TSHZ1     | 1 | chr18 | 72949954  |
| SHISA9    | 1 | chr16 | 13166315  |
| GFRA1     | 1 | chr10 | 117883900 |
| THBS3     | 1 | chr1  | 155174105 |
| MRGPRX2   | 1 | chr11 | 19077819  |
| KDM2B     | 1 | chr12 | 121891696 |
| TTLL1     | 1 | chr22 | 43457167  |
| MFRP      | 1 | chr11 | 119216504 |
| 9-Sep     | 1 | chr17 | 75348109  |
| MICAL3    | 1 | chr22 | 18398207  |
| TLL2      | 1 | chr10 | 98132016  |
| HDAC11    | 1 | chr3  | 13528297  |
| COMMD10   | 1 | chr5  | 115444798 |
| DSCAM     | 1 | chr21 | 41654239  |
| APOBEC3H  | 1 | chr22 | 39496742  |
| RAB11FIP4 | 1 | chr17 | 29834071  |
| KCNQ1     | 1 | chr11 | 2495420   |
| DNAH9     | 1 | chr17 | 11579945  |
| RCOR1     | 1 | chr14 | 103128775 |
| PLXNA4    | 1 | chr7  | 132187312 |
| NT5DC3    | 1 | chr12 | 104185494 |
| YIF1B     | 1 | chr19 | 38794450  |
| SPEG      | 1 | chr2  | 220354384 |
| DGKQ      | 1 | chr4  | 960712    |
| TUBB3     | 1 | chr16 | 90001902  |
| RAB1A     | 1 | chr2  | 65345703  |
| GABRA5    | 1 | chr15 | 27128821  |

|              |   |       |           |
|--------------|---|-------|-----------|
| TBL1XR1      | 1 | chr3  | 176889359 |
| LOC442459    | 1 | chrX  | 99036839  |
| FILIP1       | 1 | chr6  | 76160100  |
| ATPBD4-AS1   | 1 | chr15 | 35970622  |
| CCDC134      | 1 | chr22 | 42220489  |
| SEC14L4      | 1 | chr22 | 30899353  |
| NTN1         | 1 | chr17 | 8993970   |
| LOC100287314 | 1 | chr12 | 30948769  |
| MIR548AO     | 1 | chr5  | 92934607  |
| KCNK13       | 1 | chr14 | 90564920  |
| ADARB2-AS1   | 1 | chr10 | 1590616   |
| CDC7         | 1 | chr1  | 91983472  |
| C1QTNF5      | 1 | chr11 | 119216504 |
| ADH5         | 1 | chr4  | 100007865 |
| MAP2K3       | 1 | chr17 | 21195047  |
| CUL3         | 1 | chr2  | 225394812 |
| RAB35        | 1 | chr12 | 120538685 |
| NKD2         | 1 | chr5  | 1033924   |
| IL12RB1      | 1 | chr19 | 18183527  |
| TBC1D9       | 1 | chr4  | 141675541 |
| PRKAG3       | 1 | chr2  | 219691758 |
| UBAC2        | 1 | chr13 | 99977592  |
| LOC200772    | 1 | chr2  | 241906186 |
| MMP25        | 1 | chr16 | 3102462   |
| PPP4R1L      | 1 | chr20 | 56845938  |
| MIR548F5     | 1 | chr13 | 36227031  |
| ACE          | 1 | chr17 | 61562922  |
| TMBIM1       | 1 | chr2  | 219146078 |
| DNMT3A       | 1 | chr2  | 25465487  |
| SMOC1        | 1 | chr14 | 70397475  |
| RNGTT        | 1 | chr6  | 89498970  |
| MEI1         | 1 | chr22 | 42143536  |
| UNC13C       | 1 | chr15 | 54316941  |
| LOXL2        | 1 | chr8  | 23155335  |
| WNK1         | 1 | chr12 | 917009    |
| MFSD12       | 1 | chr19 | 3543396   |
| CDON         | 1 | chr11 | 125854390 |
| TNFRSF19     | 1 | chr13 | 24199623  |
| PCDHA8       | 1 | chr5  | 140222356 |
| SETD8        | 1 | chr12 | 123881894 |
| CACNA1A      | 1 | chr19 | 13593094  |
| LOC653712    | 1 | chr3  | 128587817 |
| SRCAP        | 1 | chr16 | 30747191  |



|              |   |       |           |
|--------------|---|-------|-----------|
| RAPGEF3      | 1 | chr12 | 48134634  |
| ISM1         | 1 | chr20 | 13213728  |
| CPPED1       | 1 | chr16 | 12795662  |
| ST20-MTHFS   | 1 | chr15 | 80179495  |
| DPP6         | 1 | chr7  | 154384180 |
| LINC00620    | 1 | chr3  | 13694628  |
| RASIP1       | 1 | chr19 | 49233333  |
| IARS2        | 1 | chr1  | 220313851 |
| PEAR1        | 1 | chr1  | 156883491 |
| ADAM8        | 1 | chr10 | 135078760 |
| CELF5        | 1 | chr19 | 3252242   |
| PTDSS2       | 1 | chr11 | 472525    |
| MAGI1        | 1 | chr3  | 65412778  |
| LDLRAD3      | 1 | chr11 | 36060708  |
| FRMD1        | 1 | chr6  | 168474308 |
| MAP3K15      | 1 | chrX  | 19490198  |
| LRRK1        | 1 | chr15 | 101504495 |
| PPIL4        | 1 | chr6  | 149846961 |
| ZNF346       | 1 | chr5  | 176484225 |
| FAM208B      | 1 | chr10 | 5731339   |
| RNF103-CHMP3 | 1 | chr2  | 86829355  |
| SEC24D       | 1 | chr4  | 119713046 |
| HCK          | 1 | chr20 | 30642232  |
| KANSL1       | 1 | chr17 | 44220941  |
| POP1         | 1 | chr8  | 99137831  |
| CMC1         | 1 | chr3  | 28296877  |
| CTNNA3       | 1 | chr10 | 67854284  |
| ZFP42        | 1 | chr4  | 188918166 |
| AKIRIN1      | 1 | chr1  | 39468217  |
| C1orf216     | 1 | chr1  | 36181446  |
| MAGEL2       | 1 | chr15 | 23891602  |
| STK11        | 1 | chr19 | 1219701   |
| LOC285577    | 1 | chr5  | 3491300   |
| KIAA1671     | 1 | chr22 | 25567235  |
| NME4         | 1 | chr16 | 448131    |
| C16orf45     | 1 | chr16 | 15636155  |
| JRK          | 1 | chr8  | 143747271 |
| SLC4A7       | 1 | chr3  | 27421654  |
| CNTRL        | 1 | chr9  | 123926393 |
| MRPL28       | 1 | chr16 | 419921    |
| RGS12        | 1 | chr4  | 3374161   |
| MAGEB3       | 1 | chrX  | 30250321  |
| LDLRAD4      | 1 | chr18 | 13571929  |

|               |   |       |           |
|---------------|---|-------|-----------|
| RGCC          | 1 | chr13 | 42043265  |
| TREH          | 1 | chr11 | 118529125 |
| TCF7L1        | 1 | chr2  | 85517291  |
| CNPY1         | 1 | chr7  | 155323907 |
| JMJD7-PLA2G4B | 1 | chr15 | 42135988  |
| ZNF517        | 1 | chr8  | 146030084 |
| CNR2          | 1 | chr1  | 24204072  |
| LINC00689     | 1 | chr7  | 158816261 |
| SARM1         | 1 | chr17 | 26708335  |
| PQLC1         | 1 | chr18 | 77683125  |
| LYRM7         | 1 | chr5  | 130529475 |
| SNTG2         | 1 | chr2  | 1357789   |
| BCYRN1        | 1 | chrX  | 70882202  |
| SYS1-DBNDD2   | 1 | chr20 | 44023473  |
| FHDC1         | 1 | chr4  | 153896358 |
| DDX49         | 1 | chr19 | 19035368  |
| CDC42SE2      | 1 | chr5  | 130638028 |
| HMHA1         | 1 | chr19 | 1071946   |
| MECOM         | 1 | chr3  | 168827493 |
| NRXN3         | 1 | chr14 | 79562574  |
| ATP8B1        | 1 | chr18 | 55315437  |
| ATP6V1C2      | 1 | chr2  | 10918531  |
| SCAI          | 1 | chr9  | 127801355 |
| CPLX2         | 1 | chr5  | 175280608 |
| ERBB4         | 1 | chr2  | 212566718 |
| VPS52         | 1 | chr6  | 33223425  |
| TENM2         | 1 | chr5  | 167011860 |
| RTF1          | 1 | chr15 | 41729232  |
| ALX4          | 1 | chr11 | 44330555  |
| WNK4          | 1 | chr17 | 40934275  |
| RANBP17       | 1 | chr5  | 170504170 |
| SH3PXD2A      | 1 | chr10 | 105584366 |
| EEF2K         | 1 | chr16 | 22240790  |
| PIGN          | 1 | chr18 | 59803822  |
| DNAJB13       | 1 | chr11 | 73681089  |
| GCH1          | 1 | chr14 | 55363590  |
| TNS3          | 1 | chr7  | 47534646  |
| SSBP3         | 1 | chr1  | 54869839  |
| WDR1          | 1 | chr4  | 10114811  |
| ADCY3         | 1 | chr2  | 25064191  |
| INPP5D        | 1 | chr2  | 234080746 |
| CATSPERD      | 1 | chr19 | 5744912   |
| QSOX2         | 1 | chr9  | 139101770 |

|              |   |       |           |
|--------------|---|-------|-----------|
| PPWD1        | 1 | chr5  | 64861269  |
| FIBP         | 1 | chr11 | 65655077  |
| LOC150935    | 1 | chr2  | 240698235 |
| PRKCA        | 1 | chr17 | 64479342  |
| COL22A1      | 1 | chr8  | 139883644 |
| OTOP1        | 1 | chr4  | 4221165   |
| IQCA1        | 1 | chr2  | 237370989 |
| RUFY2        | 1 | chr10 | 70118541  |
| PPP2CB       | 1 | chr8  | 30667309  |
| MIR548AI     | 1 | chr14 | 29968344  |
| CXorf49B     | 1 | chrX  | 70987013  |
| MYH14        | 1 | chr19 | 50752376  |
| ITIH6        | 1 | chrX  | 54785262  |
| TLR8-AS1     | 1 | chrX  | 12924035  |
| PPM1G        | 1 | chr2  | 27605982  |
| AGAP1        | 1 | chr2  | 236754256 |
| ONECUT1      | 1 | chr15 | 53081116  |
| ZNF578       | 1 | chr19 | 52985695  |
| FAR1         | 1 | chr11 | 13695712  |
| LOC100505549 | 1 | chr18 | 55315437  |
| SEPHS1       | 1 | chr10 | 13377716  |
| CDK11B       | 1 | chr1  | 1576635   |
| SCARA3       | 1 | chr8  | 27494605  |
| KIF25        | 1 | chr6  | 168419593 |
| MACROD2      | 1 | chr20 | 15984559  |
| GYG2         | 1 | chrX  | 2771538   |
| TTC7B        | 1 | chr14 | 91268771  |
| HPN          | 1 | chr19 | 35537771  |
| LONRF3       | 1 | chrX  | 118143818 |
| KIF26A       | 1 | chr14 | 104613056 |
| COL4A4       | 1 | chr2  | 227892708 |
| RNF175       | 1 | chr4  | 154674748 |
| DET1         | 1 | chr15 | 89067474  |
| ITGA9        | 1 | chr3  | 37572577  |
| KLF13        | 1 | chr15 | 31658668  |
| MAFK         | 1 | chr7  | 1574811   |
| CDH15        | 1 | chr16 | 89261144  |
| CASZ1        | 1 | chr1  | 10828178  |
| EFHA1        | 1 | chr13 | 22069818  |
| GABRD        | 1 | chr1  | 1956361   |
| SYNGR1       | 1 | chr22 | 39746803  |
| CRELD2       | 1 | chr22 | 50318505  |
| CCT6P3       | 1 | chr7  | 64516736  |

|              |   |       |           |
|--------------|---|-------|-----------|
| GRID1        | 1 | chr10 | 88028472  |
| SEC14L5      | 1 | chr16 | 5047168   |
| CELF4        | 1 | chr18 | 34988706  |
| DAB1         | 1 | chr1  | 58566803  |
| MUC5B        | 1 | chr11 | 1271429   |
| FLJ37505     | 1 | chr12 | 128375623 |
| C1orf106     | 1 | chr1  | 200863771 |
| COL8A1       | 1 | chr3  | 99376747  |
| NT5M         | 1 | chr17 | 17210459  |
| LRP12        | 1 | chr8  | 105540724 |
| FAM219A      | 1 | chr9  | 34400580  |
| CUL1         | 1 | chr7  | 148480233 |
| DRAM1        | 1 | chr12 | 102277334 |
| ACAP3        | 1 | chr1  | 1229850   |
| CHAF1B       | 1 | chr21 | 37761362  |
| PM20D1       | 1 | chr1  | 205819038 |
| IL2RA        | 1 | chr10 | 6096005   |
| NCF2         | 1 | chr1  | 183549851 |
| MOB3B        | 1 | chr9  | 27355326  |
| SOX3         | 1 | chrX  | 139586813 |
| MAPT         | 1 | chr17 | 44022067  |
| TRPM8        | 1 | chr2  | 234908509 |
| PEX6         | 1 | chr6  | 42934500  |
| CERS1        | 1 | chr19 | 19004173  |
| PRR5-ARHGAP8 | 1 | chr22 | 45151454  |
| UCK1         | 1 | chr9  | 134405414 |
| S1PR3        | 1 | chr9  | 91612882  |
| BCAS4        | 1 | chr20 | 49427252  |
| DHX37        | 1 | chr12 | 125448959 |
| FAM189A2     | 1 | chr9  | 71951803  |
| LRP2         | 1 | chr2  | 170105268 |
| GPC1         | 1 | chr2  | 241387018 |
| SPN          | 1 | chr16 | 29675927  |
| BAHCC1       | 1 | chr17 | 79395033  |
| SPAG16       | 1 | chr2  | 214629889 |
| ANO9         | 1 | chr11 | 433903    |
| CORO2B       | 1 | chr15 | 69011119  |
| C14orf132    | 1 | chr14 | 96523939  |
| TRAK1        | 1 | chr3  | 42242685  |
| FBLN2        | 1 | chr3  | 13608943  |
| CDH9         | 1 | chr5  | 26896115  |
| DAG1         | 1 | chr3  | 49517215  |
| RAB36        | 1 | chr22 | 23505575  |

|              |   |       |           |
|--------------|---|-------|-----------|
| DRD4         | 1 | chr11 | 639552    |
| LCLAT1       | 1 | chr2  | 30822053  |
| HPSE2        | 1 | chr10 | 100587254 |
| MCM3AP       | 1 | chr21 | 47691729  |
| ZFP82        | 1 | chr19 | 36893856  |
| PTPRT        | 1 | chr20 | 41042717  |
| DLGAP3       | 1 | chr1  | 35369244  |
| SP2          | 1 | chr17 | 45988531  |
| ITGAL        | 1 | chr16 | 30503727  |
| SLC2A6       | 1 | chr9  | 136340458 |
| MIR5009      | 1 | chr21 | 29036527  |
| TNFRSF1B     | 1 | chr1  | 12249019  |
| LIPT2        | 1 | chr11 | 74203582  |
| PTPRD        | 1 | chr9  | 10362794  |
| TBL1X        | 1 | chrX  | 9494077   |
| PDZD7        | 1 | chr10 | 102771571 |
| TMEM151B     | 1 | chr6  | 44243190  |
| LOC100128675 | 1 | chr19 | 35570306  |
| PI16         | 1 | chr6  | 36917094  |
| GNAT1        | 1 | chr3  | 50231058  |
| GYPA         | 1 | chr4  | 145053198 |
| PTCHD2       | 1 | chr1  | 11591735  |
| INPP5J       | 1 | chr22 | 31523685  |
| ZNF280C      | 1 | chrX  | 129385813 |
| BMP15        | 1 | chrX  | 50659488  |
| LZTS2        | 1 | chr10 | 102764820 |
| FAM47A       | 1 | chrX  | 34148956  |
| COL15A1      | 1 | chr9  | 101737047 |
| MAD1L1       | 1 | chr7  | 2164994   |
| ITPR1        | 1 | chr3  | 4825829   |
| ZNF284       | 1 | chr19 | 44585591  |
| EXD3         | 1 | chr9  | 140241360 |
| STK32C       | 1 | chr10 | 134119998 |
| R3HDM4       | 1 | chr19 | 897518    |
| CCDC88C      | 1 | chr14 | 91881920  |
| TAF4         | 1 | chr20 | 60598912  |
| PI4K2B       | 1 | chr4  | 25248474  |
| SFRP1        | 1 | chr8  | 41122515  |
| SLC25A29     | 1 | chr14 | 100764469 |
| CDR2L        | 1 | chr17 | 72999772  |
| PTPRH        | 1 | chr19 | 55704213  |
| DCAF12L2     | 1 | chrX  | 125299550 |
| CDH23        | 1 | chr10 | 73521730  |

|              |   |       |           |
|--------------|---|-------|-----------|
| FLJ13197     | 1 | chr4  | 38616757  |
| EMR3         | 1 | chr19 | 14751290  |
| TMEM8A       | 1 | chr16 | 427782    |
| LEPR         | 1 | chr1  | 65985735  |
| KCNG2        | 1 | chr18 | 77624266  |
| TMEM44       | 1 | chr3  | 194324731 |
| SRSF4        | 1 | chr1  | 29485475  |
| MRC2         | 1 | chr17 | 60728953  |
| DNAH17       | 1 | chr17 | 76565604  |
| WNT9A        | 1 | chr1  | 228110732 |
| EVC2         | 1 | chr4  | 5596076   |
| LOC100132354 | 1 | chr6  | 43878654  |
| NRF1         | 1 | chr7  | 129265545 |
| RIMS2        | 1 | chr8  | 105081884 |
| BTBD2        | 1 | chr19 | 2000129   |
| IKBIP        | 1 | chr12 | 99013627  |
| GRIN2B       | 1 | chr12 | 13917683  |
| NFAT5        | 1 | chr16 | 69662907  |
| DTNB         | 1 | chr2  | 25638407  |
| PHF21B       | 1 | chr22 | 45339200  |
| ZAP70        | 1 | chr2  | 98351851  |
| PKP4         | 1 | chr2  | 159519478 |
| B4GALT1      | 1 | chr9  | 33132490  |
| LOC100288637 | 1 | chr15 | 31059158  |
| RBP7         | 1 | chr1  | 10064649  |
| DCDC2        | 1 | chr6  | 24301369  |
| PAPLN        | 1 | chr14 | 73719984  |
| PCGF2        | 1 | chr17 | 36894037  |
| ATCAY        | 1 | chr19 | 3913959   |
| PIP5K1P1     | 1 | chr6  | 7986670   |
| LRRTM4       | 1 | chr2  | 77379705  |
| TRPM5        | 1 | chr11 | 2434036   |
| ME3          | 1 | chr11 | 86267676  |
| COL25A1      | 1 | chr4  | 109933638 |
| RGS7         | 1 | chr1  | 241227281 |
| WWP2         | 1 | chr16 | 69812703  |
| PRICKLE2-AS3 | 1 | chr3  | 64183682  |
| TFDP2        | 1 | chr3  | 141846292 |
| FAM207A      | 1 | chr21 | 46387352  |
| LRRC15       | 1 | chr3  | 194077617 |
| PCBP3        | 1 | chr21 | 47308320  |
| MDGA2        | 1 | chr14 | 47631349  |
| GFOD1        | 1 | chr6  | 13430489  |

|                |   |       |           |
|----------------|---|-------|-----------|
| PLIN3          | 1 | chr19 | 4854735   |
| ATP9A          | 1 | chr20 | 50382048  |
| STON1-GTF2A1L  | 1 | chr2  | 48841796  |
| DENND2C        | 1 | chr1  | 115174199 |
| APBA2          | 1 | chr15 | 29227420  |
| MSRA           | 1 | chr8  | 10225240  |
| BEND2          | 1 | chrX  | 18236885  |
| PEBP4          | 1 | chr8  | 22770137  |
| LINC00673      | 1 | chr17 | 70526843  |
| IFNAR1         | 1 | chr21 | 34711337  |
| F10            | 1 | chr13 | 113778484 |
| ATRNL1         | 1 | chr10 | 116999175 |
| CCDC113        | 1 | chr16 | 58300770  |
| RAB40B         | 1 | chr17 | 80617214  |
| SAFB2          | 1 | chr19 | 5591280   |
| EPHA3          | 1 | chr3  | 89252688  |
| CTSH           | 1 | chr15 | 79224683  |
| AR             | 1 | chrX  | 66766196  |
| ATP6V0CP3      | 1 | chr6  | 42695529  |
| NACC2          | 1 | chr9  | 138966820 |
| ANKRD24        | 1 | chr19 | 4190586   |
| CELSR1         | 1 | chr22 | 46908054  |
| TMEM145        | 1 | chr19 | 42828238  |
| PSMA8          | 1 | chr18 | 23764533  |
| DCUN1D5        | 1 | chr11 | 102958119 |
| HDAC9          | 1 | chr7  | 18547111  |
| CDX2           | 1 | chr13 | 28541503  |
| KDELR3         | 1 | chr22 | 38872469  |
| ALOX5AP        | 1 | chr13 | 31306311  |
| GOLGB1         | 1 | chr3  | 121407725 |
| DBF4B          | 1 | chr17 | 42827672  |
| TOM1L1         | 1 | chr17 | 53013356  |
| SLITRK4        | 1 | chrX  | 142721761 |
| ZNF831         | 1 | chr20 | 57780553  |
| ANKFY1         | 1 | chr17 | 4165347   |
| WDR88          | 1 | chr19 | 33653408  |
| C15orf38-AP3S2 | 1 | chr15 | 90425672  |
| SLC35F5        | 1 | chr2  | 114505405 |
| SGCG           | 1 | chr13 | 23872175  |
| ITPR3          | 1 | chr6  | 33606522  |
| LOC100131691   | 1 | chr19 | 59082605  |
| GPR151         | 1 | chr5  | 145895164 |
| C20orf78       | 1 | chr20 | 18795558  |

|              |   |       |           |
|--------------|---|-------|-----------|
| KIF21B       | 1 | chr1  | 200969919 |
| SUV420H2     | 1 | chr19 | 55856850  |
| HLX          | 1 | chr1  | 221057645 |
| VWA3A        | 1 | chr16 | 22136995  |
| SELM         | 1 | chr22 | 31503149  |
| KANK1        | 1 | chr9  | 580997    |
| EFCAB6       | 1 | chr22 | 44182208  |
| HAGHL        | 1 | chr16 | 779687    |
| TMPRSS15     | 1 | chr21 | 19693947  |
| NEBL         | 1 | chr10 | 21183608  |
| LAMA4        | 1 | chr6  | 112505108 |
| STX16-NPEPL1 | 1 | chr20 | 57274149  |
| NEK6         | 1 | chr9  | 127105254 |
| PROS1        | 1 | chr3  | 93683979  |
| SVIL         | 1 | chr10 | 29780291  |
| FBXL18       | 1 | chr7  | 5541655   |
| STX2         | 1 | chr12 | 131276761 |
| BTNL9        | 1 | chr5  | 180482539 |
| PHACTR4      | 1 | chr1  | 28756657  |
| SNRPA        | 1 | chr19 | 41259867  |
| CCDC130      | 1 | chr19 | 13866135  |
| POC1B        | 1 | chr12 | 89897387  |
| CDH1         | 1 | chr16 | 68787529  |
| PDE9A        | 1 | chr21 | 44152788  |
| BRI3BP       | 1 | chr12 | 125503520 |
| ANGPT2       | 1 | chr8  | 6365738   |
| HRH1         | 1 | chr3  | 11210314  |
| HOXD3        | 1 | chr2  | 177036642 |
| HTR2C        | 1 | chrX  | 113981251 |
| WDR83        | 1 | chr19 | 12782089  |
| CSNK1D       | 1 | chr17 | 80209233  |
| SPEN         | 1 | chr1  | 16184131  |
| DNAH11       | 1 | chr7  | 21871891  |
| BTBD16       | 1 | chr10 | 124089034 |
| MUC17        | 1 | chr7  | 100684925 |
| MLF1         | 1 | chr3  | 158319418 |
| GRIK3        | 1 | chr1  | 37380385  |
| ZIC5         | 1 | chr13 | 100621419 |
| CDHR2        | 1 | chr5  | 176011887 |
| BICD1        | 1 | chr12 | 32528150  |
| UBE2H        | 1 | chr7  | 129534618 |
| MORN1        | 1 | chr1  | 2310576   |
| AKT1         | 1 | chr14 | 105249322 |



|             |   |       |           |
|-------------|---|-------|-----------|
| ASCL3       | 1 | chr11 | 8959545   |
| COL5A3      | 1 | chr19 | 10102490  |
| TMED10      | 1 | chr14 | 75621019  |
| KCNQ1DN     | 1 | chr11 | 2891269   |
| PPP1R14C    | 1 | chr6  | 150501103 |
| ADNP2       | 1 | chr18 | 77879657  |
| ATF7IP      | 1 | chr12 | 14594740  |
| KIRREL3     | 1 | chr11 | 126453648 |
| SLC26A5     | 1 | chr7  | 103016782 |
| MYO18B      | 1 | chr22 | 26323726  |
| PPP1R37     | 1 | chr19 | 45618958  |
| MAEA        | 1 | chr4  | 1310925   |
| RAB11B      | 1 | chr19 | 8468337   |
| AP3S2       | 1 | chr15 | 90425672  |
| SSTR5       | 1 | chr16 | 1124965   |
| RGN         | 1 | chrX  | 46948159  |
| BPTF        | 1 | chr17 | 65867128  |
| PNMA3       | 1 | chrX  | 152225031 |
| PDXDC1      | 1 | chr16 | 15083515  |
| PVRL1       | 1 | chr11 | 119574608 |
| JPH3        | 1 | chr16 | 87702494  |
| IQSEC1      | 1 | chr3  | 12946689  |
| TNNI3K      | 1 | chr1  | 74712951  |
| PROM1       | 1 | chr4  | 16011211  |
| GEMIN7      | 1 | chr19 | 45587004  |
| CC2D1A      | 1 | chr19 | 14041481  |
| RNU6-81     | 1 | chr2  | 132203010 |
| NXN         | 1 | chr17 | 743982    |
| MED24       | 1 | chr17 | 38179288  |
| NRP2        | 1 | chr2  | 206551978 |
| ZNF398      | 1 | chr7  | 148864851 |
| MUC4        | 1 | chr3  | 195474368 |
| CXorf49     | 1 | chrX  | 70987013  |
| SNORD115-21 | 1 | chr15 | 25455720  |
| VGLL4       | 1 | chr3  | 11611732  |
| AGPS        | 1 | chr2  | 178331204 |
| ZFYVE1      | 1 | chr14 | 73477261  |
| MTHFS       | 1 | chr15 | 80179495  |
| PTPRS       | 1 | chr19 | 5238770   |
| CLEC17A     | 1 | chr19 | 14712697  |
| MEGF6       | 1 | chr1  | 3450637   |
| LINC00200   | 1 | chr10 | 1206496   |
| WNT3A       | 1 | chr1  | 228206934 |

|              |   |       |           |
|--------------|---|-------|-----------|
| SAMD3        | 1 | chr6  | 130581876 |
| CHST8        | 1 | chr19 | 34188708  |
| EML1         | 1 | chr14 | 100402814 |
| SYT2         | 1 | chr1  | 202638789 |
| LYZL2        | 1 | chr10 | 30916944  |
| PLEKHA5      | 1 | chr12 | 19383370  |
| IGSF21       | 1 | chr1  | 18527092  |
| TSPAN9       | 1 | chr12 | 3227502   |
| DHDH         | 1 | chr19 | 49440851  |
| SNTG1        | 1 | chr8  | 51382942  |
| MIPEP        | 1 | chr13 | 24341072  |
| SYNGR3       | 1 | chr16 | 2041493   |
| ALDH3B2      | 1 | chr11 | 67438801  |
| ICOSLG       | 1 | chr21 | 45648880  |
| BCORL1       | 1 | chrX  | 129159505 |
| SPON1        | 1 | chr11 | 14099081  |
| TNRC18       | 1 | chr7  | 5427651   |
| SACS         | 1 | chr13 | 23966201  |
| MLLT10       | 1 | chr10 | 21883429  |
| ABCG2        | 1 | chr4  | 89021640  |
| POU4F1-AS1   | 1 | chr13 | 78969375  |
| PCNT         | 1 | chr21 | 47836653  |
| RAB40C       | 1 | chr16 | 651516    |
| TNNT1        | 1 | chr19 | 55652270  |
| KIAA0825     | 1 | chr5  | 93869138  |
| CNIH3        | 1 | chr1  | 224874744 |
| SORCS2       | 1 | chr4  | 7451442   |
| ENOX2        | 1 | chrX  | 129987599 |
| EPHA2        | 1 | chr1  | 16455051  |
| WDR19        | 1 | chr4  | 39233975  |
| PLA2G3       | 1 | chr22 | 31533965  |
| SLC12A3      | 1 | chr16 | 56926792  |
| CCNY         | 1 | chr10 | 35558831  |
| TBC1D30      | 1 | chr12 | 65269045  |
| GSG1L        | 1 | chr16 | 27802755  |
| EPHA1-AS1    | 1 | chr7  | 143111464 |
| ACSL4        | 1 | chrX  | 108943360 |
| FAM160B1     | 1 | chr10 | 116636620 |
| LINC00251    | 1 | chr8  | 66078831  |
| C9orf96      | 1 | chr9  | 136247289 |
| ARMC2        | 1 | chr6  | 109276551 |
| LOC100128946 | 1 | chr22 | 49290652  |
| PFKFB3       | 1 | chr10 | 6265203   |

|            |   |       |           |
|------------|---|-------|-----------|
| THBS2      | 1 | chr6  | 169652497 |
| RAI1       | 1 | chr17 | 17700234  |
| LIMS2      | 1 | chr2  | 128429090 |
| ENPP6      | 1 | chr4  | 185037323 |
| MYO9B      | 1 | chr19 | 17188322  |
| SMAD6      | 1 | chr15 | 66998856  |
| EPB41L2    | 1 | chr6  | 131245620 |
| ZEB1       | 1 | chr10 | 31659276  |
| ZNF846     | 1 | chr19 | 9877935   |
| SLC17A2    | 1 | chr6  | 25925633  |
| WDR65      | 1 | chr1  | 43702360  |
| GRM5       | 1 | chr11 | 88619806  |
| TSC22D3    | 1 | chrX  | 106959465 |
| CNNM4      | 1 | chr2  | 97442817  |
| ZNF524     | 1 | chr19 | 56113828  |
| POMT1      | 1 | chr9  | 134397624 |
| EPB41L1    | 1 | chr20 | 34783506  |
| ZNF329     | 1 | chr19 | 58658691  |
| C19orf71   | 1 | chr19 | 3543396   |
| TMCO3      | 1 | chr13 | 114166775 |
| KCNK5      | 1 | chr6  | 39167605  |
| MCC        | 1 | chr5  | 112579417 |
| AK5        | 1 | chr1  | 77927325  |
| KLHL29     | 1 | chr2  | 23773096  |
| SDK2       | 1 | chr17 | 71453731  |
| PCDHA9     | 1 | chr5  | 140233651 |
| ARL2-SNX15 | 1 | chr11 | 64790137  |
| SCN4B      | 1 | chr11 | 118023118 |
| MGMT       | 1 | chr10 | 131536574 |
| CHMP6      | 1 | chr17 | 78971536  |
| SLC27A1    | 1 | chr19 | 17611259  |
| ANXA11     | 1 | chr10 | 81921078  |
| NBEA       | 1 | chr13 | 36227031  |
| MGA        | 1 | chr15 | 42024577  |
| TACC3      | 1 | chr4  | 1737502   |
| LINC00174  | 1 | chr7  | 65852199  |
| SCARB1     | 1 | chr12 | 125341870 |
| CABP1      | 1 | chr12 | 121088884 |
| CCT3       | 1 | chr1  | 156293490 |
| EYA2       | 1 | chr20 | 45543675  |
| MDGA1      | 1 | chr6  | 37616899  |
| NCAM2      | 1 | chr21 | 22385757  |
| MYO1D      | 1 | chr17 | 30831244  |

|             |   |       |           |
|-------------|---|-------|-----------|
| HOMER3      | 1 | chr19 | 19041551  |
| PRR12       | 1 | chr19 | 50105239  |
| SCAMP5      | 1 | chr15 | 75293407  |
| GALNT14     | 1 | chr2  | 31149648  |
| B4GALNT4    | 1 | chr11 | 372156    |
| SLC1A7      | 1 | chr1  | 53588498  |
| CD58        | 1 | chr1  | 117059978 |
| ERC1        | 1 | chr12 | 1421739   |
| KNDC1       | 1 | chr10 | 134979519 |
| CCDC36      | 1 | chr3  | 49238668  |
| MZF1        | 1 | chr19 | 59082605  |
| SERPINH1    | 1 | chr11 | 75279846  |
| UHRF1BP1L   | 1 | chr12 | 100518917 |
| TTLL6       | 1 | chr17 | 46855467  |
| CLPTM1L     | 1 | chr5  | 1331692   |
| DUSP27      | 1 | chr1  | 167075205 |
| PCSK6       | 1 | chr15 | 101924537 |
| EED         | 1 | chr11 | 85964886  |
| HMMR        | 1 | chr5  | 162896152 |
| DGCR5       | 1 | chr22 | 18961797  |
| CHRNA4      | 1 | chr20 | 61987340  |
| TNFAIP2     | 1 | chr14 | 103595564 |
| CAPN13      | 1 | chr2  | 30955476  |
| TBATA       | 1 | chr10 | 72542669  |
| CHTF18      | 1 | chr16 | 841965    |
| PCDHB4      | 1 | chr5  | 140503914 |
| ITGBL1      | 1 | chr13 | 102277204 |
| MRTO4       | 1 | chr1  | 19583733  |
| AKAP9       | 1 | chr7  | 91733664  |
| CA6         | 1 | chr1  | 9024551   |
| FANCC       | 1 | chr9  | 97979533  |
| DEF8        | 1 | chr16 | 90020861  |
| QSOX1       | 1 | chr1  | 180157189 |
| FAM19A1     | 1 | chr3  | 68574113  |
| FGF2        | 1 | chr4  | 123787320 |
| FPGT-TNNI3K | 1 | chr1  | 74712951  |
| KCNA2       | 1 | chr1  | 111144026 |
| PPP5D1      | 1 | chr19 | 46988945  |
| DENND4C     | 1 | chr9  | 19274447  |
| SPATA2      | 1 | chr20 | 48526703  |
| GAK         | 1 | chr4  | 878078    |
| CHRNA1      | 1 | chr17 | 7353235   |
| SERPINI1    | 1 | chr3  | 167535541 |

|              |   |       |           |
|--------------|---|-------|-----------|
| SGTA         | 1 | chr19 | 2754809   |
| SEPSECS      | 1 | chr4  | 25158222  |
| NDP          | 1 | chrX  | 43829064  |
| IGF1R        | 1 | chr15 | 99206152  |
| SEC14L1      | 1 | chr17 | 75170673  |
| GSK3B        | 1 | chr3  | 119689587 |
| CLUH         | 1 | chr17 | 2593661   |
| LOC100652739 | 1 | chr6  | 150226492 |
| PIEZO2       | 1 | chr18 | 11023984  |
| CIITA        | 1 | chr16 | 11006702  |
| RHPN1-AS1    | 1 | chr8  | 144449706 |
| ITGB2        | 1 | chr21 | 46339178  |
| C7orf50      | 1 | chr7  | 1100693   |
| TSPEAR       | 1 | chr21 | 46101348  |
| WIPI1        | 1 | chr17 | 66430512  |
| SYN3         | 1 | chr22 | 32955541  |
| MPND         | 1 | chr19 | 4351596   |
| CABP7        | 1 | chr22 | 30122279  |
| SIK3         | 1 | chr11 | 116730736 |
| GLB1L3       | 1 | chr11 | 134151819 |
| PPP2R2B      | 1 | chr5  | 146387464 |
| GLI3         | 1 | chr7  | 42060051  |
| FGFRL1       | 1 | chr4  | 1017233   |
| IL32         | 1 | chr16 | 3117519   |
| CTNS         | 1 | chr17 | 3561310   |
| GOLGA8A      | 1 | chr15 | 34702884  |
| SLC39A11     | 1 | chr17 | 71031784  |
| FHIT         | 1 | chr3  | 60004440  |
| LINC00294    | 1 | chr11 | 33097876  |
| NAV1         | 1 | chr1  | 201708421 |
| BSN          | 1 | chr3  | 49701981  |
| TAOK2        | 1 | chr16 | 29994922  |
| MYO15A       | 1 | chr17 | 18023872  |
| DMD          | 1 | chrX  | 31912609  |
| COLQ         | 1 | chr3  | 15562510  |
| SLK          | 1 | chr10 | 105735726 |
| RBM47        | 1 | chr4  | 40599002  |
| PODN         | 1 | chr1  | 53537264  |
| HERC1        | 1 | chr15 | 64103745  |
| DSEL         | 1 | chr18 | 65176221  |
| TRAPPC8      | 1 | chr18 | 29457371  |
| SPATS2       | 1 | chr12 | 49897385  |
| NADK         | 1 | chr1  | 1684471   |

|                |   |       |           |
|----------------|---|-------|-----------|
| C10orf54       | 1 | chr10 | 73521730  |
| RNF149         | 1 | chr2  | 101894221 |
| MIR548G        | 1 | chr3  | 99376747  |
| BLOC1S5-TXNDC5 | 1 | chr6  | 7986670   |
| C4orf45        | 1 | chr4  | 159893282 |
| UBR3           | 1 | chr2  | 170721309 |
| TAZ            | 1 | chrX  | 153648928 |
| GNG7           | 1 | chr19 | 2601809   |
| FGD4           | 1 | chr12 | 32677157  |
| NPEPL1         | 1 | chr20 | 57274149  |
| FCHO1          | 1 | chr19 | 17899267  |
| ZNF7           | 1 | chr8  | 146068321 |
| KAT2B          | 1 | chr3  | 20111266  |
| ZSWIM4         | 1 | chr19 | 13914971  |
| TGM5           | 1 | chr15 | 43554709  |
| SGCZ           | 1 | chr8  | 14722273  |
| ECE1           | 1 | chr1  | 21630582  |
| TUFT1          | 1 | chr1  | 151527035 |
| ASB18          | 1 | chr2  | 237125778 |
| NXPH1          | 1 | chr7  | 8621760   |
| PDE1A          | 1 | chr2  | 183363989 |
| SLC13A5        | 1 | chr17 | 6600139   |
| PLGRKT         | 1 | chr9  | 5433404   |
| KDM4B          | 1 | chr19 | 5013610   |
| WDR26          | 1 | chr1  | 224616740 |
| NOV            | 1 | chr8  | 120433500 |
| PIK3R6         | 1 | chr17 | 8740075   |
| CACNA1B        | 1 | chr9  | 141002309 |
| PCCA           | 1 | chr13 | 101106210 |
| C15orf27       | 1 | chr15 | 76448776  |
| DYSF           | 1 | chr2  | 71797711  |
| POLRMT         | 1 | chr19 | 626237    |
| AGPAT2         | 1 | chr9  | 139578879 |
| KIF19          | 1 | chr17 | 72350966  |
| ARHGEF6        | 1 | chrX  | 135776463 |
| CHMP5          | 1 | chr9  | 33269800  |
| ANKRD10        | 1 | chr13 | 111559451 |
| IQGAP2         | 1 | chr5  | 75897896  |
| KLHL6          | 1 | chr3  | 183260073 |
| SLC51A         | 1 | chr3  | 195955761 |
| MAD2L2         | 1 | chr1  | 11737881  |
| SMPDL3B        | 1 | chr1  | 28282206  |
| JARID2         | 1 | chr6  | 15263009  |

|               |   |       |           |
|---------------|---|-------|-----------|
| WDR24         | 1 | chr16 | 737791    |
| SLC22A23      | 1 | chr6  | 3369681   |
| ABCB10        | 1 | chr1  | 229683263 |
| SLC44A4       | 1 | chr6  | 31846535  |
| PACSIN1       | 1 | chr6  | 34466126  |
| ST3GAL2       | 1 | chr16 | 70444447  |
| COL20A1       | 1 | chr20 | 61938481  |
| ATP2B3        | 1 | chrX  | 152815799 |
| UXS1          | 1 | chr2  | 106755171 |
| FAM101A       | 1 | chr12 | 124799642 |
| HTT           | 1 | chr4  | 3234979   |
| ACSL6         | 1 | chr5  | 131327896 |
| FBXO31        | 1 | chr16 | 87421343  |
| HS6ST3        | 1 | chr13 | 96760623  |
| TIAM1         | 1 | chr21 | 32831129  |
| MAN2B2        | 1 | chr4  | 6592474   |
| ZCCHC14       | 1 | chr16 | 87496161  |
| TMEM63A       | 1 | chr1  | 226057690 |
| HELZ2         | 1 | chr20 | 62200870  |
| HPS5          | 1 | chr11 | 18338734  |
| DENND1C       | 1 | chr19 | 6471896   |
| AFMID         | 1 | chr17 | 76198457  |
| SLC25A21      | 1 | chr14 | 37297745  |
| TENM1         | 1 | chrX  | 123863938 |
| C1orf151-NBL1 | 1 | chr1  | 19964097  |
| MSN           | 1 | chrX  | 64904455  |
| MIA3          | 1 | chr1  | 222829548 |
| GLCCI1        | 1 | chr7  | 8079441   |
| ABR           | 1 | chr17 | 1075766   |
| OCA2          | 1 | chr15 | 28256783  |
| PLIN4         | 1 | chr19 | 4509493   |
| LRRC4C        | 1 | chr11 | 40316205  |
| SBNO2         | 1 | chr19 | 1122146   |
| TMEM87A       | 1 | chr15 | 42513280  |
| MAP2K2        | 1 | chr19 | 4094774   |
| POR           | 1 | chr7  | 75611354  |
| MYO15B        | 1 | chr17 | 73602079  |
| CREB5         | 1 | chr7  | 28571385  |
| SBF1          | 1 | chr22 | 50894847  |
| BID           | 1 | chr22 | 18226805  |
| GDF1          | 1 | chr19 | 19004173  |
| SNORD115-15   | 1 | chr15 | 25455720  |
| PDSS1         | 1 | chr10 | 27015761  |

|           |   |       |           |
|-----------|---|-------|-----------|
| CDH13     | 1 | chr16 | 83679983  |
| IDO2      | 1 | chr8  | 39835886  |
| RIMBP2    | 1 | chr12 | 130911205 |
| WDR45     | 1 | chrX  | 48944817  |
| FUT7      | 1 | chr9  | 139925243 |
| ENGASE    | 1 | chr17 | 77084652  |
| TUB       | 1 | chr11 | 8088757   |
| C9orf139  | 1 | chr9  | 139925243 |
| ALG12     | 1 | chr22 | 50305634  |
| PLXNC1    | 1 | chr12 | 94620569  |
| EIF4A3    | 1 | chr17 | 78114653  |
| HTRA3     | 1 | chr4  | 8278123   |
| OPRD1     | 1 | chr1  | 29190137  |
| TANGO6    | 1 | chr16 | 68983447  |
| NAALADL2  | 1 | chr3  | 175460474 |
| CDH24     | 1 | chr14 | 23517172  |
| PCP4      | 1 | chr21 | 41297673  |
| ALDH1L1   | 1 | chr3  | 125834605 |
| LINC00616 | 1 | chr4  | 138973585 |
| TBC1D1    | 1 | chr4  | 38066446  |
| ZNF687    | 1 | chr1  | 151257739 |
| KCNJ15    | 1 | chr21 | 39631463  |
| HSF1      | 1 | chr8  | 145525404 |
| PDK3      | 1 | chrX  | 24556724  |
| EPS15L1   | 1 | chr19 | 16475386  |
| GNE       | 1 | chr9  | 36260796  |
| CUX2      | 1 | chr12 | 111737846 |
| ADAMTS20  | 1 | chr12 | 43864935  |
| PIP5K1B   | 1 | chr9  | 71477604  |
| MUC6      | 1 | chr11 | 1014987   |
| ARHGAP8   | 1 | chr22 | 45151454  |
| ARHGEF3   | 1 | chr3  | 56863300  |
| NEO1      | 1 | chr15 | 73427047  |
| FRRS1L    | 1 | chr9  | 111926896 |
| WNK2      | 1 | chr9  | 96020487  |
| PIP5K1C   | 1 | chr19 | 3656067   |
| LOC643201 | 1 | chr5  | 175619319 |
| COL6A2    | 1 | chr21 | 47546166  |
| TMC6      | 1 | chr17 | 76118451  |
| ABCC6     | 1 | chr16 | 16280872  |
| DDX11L2   | 1 | chr2  | 114359994 |
| SEMA6A    | 1 | chr5  | 115801836 |
| THOP1     | 1 | chr19 | 2807373   |



|           |   |       |           |
|-----------|---|-------|-----------|
| KLRD1     | 1 | chr12 | 10465363  |
| TNFRSF8   | 1 | chr1  | 12188481  |
| KAZN      | 1 | chr1  | 15294191  |
| GUCY1A2   | 1 | chr11 | 106878919 |
| HOXD9     | 1 | chr2  | 176989431 |
| RPRD2     | 1 | chr1  | 150423967 |
| LOC388796 | 1 | chr20 | 37059349  |
| HIBCH     | 1 | chr2  | 191150856 |
| SH3GL1    | 1 | chr19 | 4399114   |
| TPST2     | 1 | chr22 | 26948220  |
| MAP7      | 1 | chr6  | 136864644 |
| KDM4C     | 1 | chr9  | 6793789   |

7,130863889,130863893,130863895,130863905,130863933,130863942,130863951,13  
8811169,88793822,88793842,88797567,88799286,88801024,88807203,88810978  
,157700218,157959879,157959895,158031992,158031994,158240238,158240243  
8891673,49035765,49057277,49057291,49091920,49114824,49146962  
0885924,80885930,80885952,80885978,80885996,80886112  
9035765,49057277,49057291,49091920,49114824,49146962  
7918019,77918027,77918046,77918052,77906595,77906650  
3877744,33911677,34060801,34060819,34194134  
1154,2048727,2063148,2081517,2089525  
8434,4256117,4256137,4256138,4850011  
7918019,77918027,77918046,77918052,77970489  
4,179623,179642,179644,179653  
,138136408,138136474,138192626,138277156  
5,101858142,101892327,101771662  
4678,1235322,1261456  
2,150834334,150834342,150834359  
2,145106721,145106730,145106740  
2,124651974,124799642,124568638  
,160102724,160102738,160102739  
,105622243,105622249,105622272  
4,177808675,177968358,177968359  
6103,7418191,7660583  
8328,5998366,5998367  
9877218,60280268,60438319  
3,101944228,101944241,101944275  
,245858320,245362168,245715801  
3,136809115,136809118,136816939  
7,813073  
4647,1238521  
0930091,60938308  
4,133102460,133118296  
4759025,15984559  
2752,3062322  
1458594,61494325  
4140753,84140777  
,223567064,223567075  
4,136648840,136648854  
8191,7660583  
70,973432  
0425843,70437604  
9022891,49022902  
0280268,60438319

9680051,99702574

5,131549814

3,234663653

6915681

3,234663653

3159

3,234663653

8157349

4,148909758

4286196

5981366

8757

3328784

),241703299

4650181

),168895630

1417575

0333

8610257

3,119046195

7220878

7,113705141

5,122350966

5,144902969

9068407

7395375

2603689

5,136199502

2,103477438

3915389

4,101924537

3,234663653

6489

7966700

3,132058411

2

7142113

3,234663653

1417575

6414300

2899

3,113409943

3,100667714

8321  
3,234663653  
6849087  
7,236944858  
3,167040005  
0616  
6166067  
,173748345  
3696395  
8962816  
3,234663653  
,151406005  
31481  
8898787  
3,240270095  
9  
9071020  
,108715748  
7042

3

1

3

7

7

)

3

1

5

2

0

0

2

3

2

0

5

3

5

1

1

1  
5

4  
1

7

4

1  
1

0

3  
1  
5

3  
1  
4

3  
5

3

3

1

3

1  
5

3

)

)

3  
)  
2  
4

)  
1

9

7

3

3

2

7

3

2

3

1

5

2

3

1

0

3

3

4

















































.0888135,130888156

| <b>Gene name</b> | <b>number of high covarian</b> | <b>chromosome</b> |
|------------------|--------------------------------|-------------------|
| ANTXR2           | 19                             | chr4              |
| WDR72            | 15                             | chr15             |
| LOC441666        | 12                             | chr10             |
| RBFOX1           | 11                             | chr16             |
| LOC441601        | 11                             | chr11             |
| ACOT7            | 11                             | chr1              |
| WDR86            | 9                              | chr7              |
| ME1              | 9                              | chr6              |
| PTPRN2           | 9                              | chr7              |
| TMEM240          | 8                              | chr1              |
| RPL23AP53        | 8                              | chr8              |
| RAP1GAP2         | 7                              | chr17             |
| FGFR3            | 7                              | chr4              |
| PSD3             | 7                              | chr8              |
| PARK2            | 7                              | chr6              |
| LINGO2           | 6                              | chr9              |
| CUX1             | 6                              | chr7              |
| ROBO1            | 6                              | chr3              |
| CEP112           | 6                              | chr17             |
| ADAMTSL3         | 6                              | chr15             |
| SORCS2           | 6                              | chr4              |
| RNU6-81          | 6                              | chr2              |
| TBC1D22A         | 6                              | chr22             |
| CDH4             | 6                              | chr20             |
| SBNO2            | 6                              | chr19             |
| LAPTM4B          | 6                              | chr8              |
| ONECUT2          | 6                              | chr18             |
| RPS6KA2          | 6                              | chr6              |
| LDLRAD4          | 5                              | chr18             |
| ADARB2           | 5                              | chr10             |
| GTF3C1           | 5                              | chr16             |
| CYP2E1           | 5                              | chr10             |
| FAM53A           | 5                              | chr4              |
| DHX37            | 5                              | chr12             |
| DLEU7-AS1        | 5                              | chr13             |
| CYP2J2           | 5                              | chr1              |
| RBFOX1           | 5                              | chr16             |
| MLLT1            | 5                              | chr19             |
| LAMA5            | 5                              | chr20             |
| KIF26B           | 5                              | chr1              |
| DCDC2            | 5                              | chr6              |
| SHANK2           | 5                              | chr11             |

|          |   |       |
|----------|---|-------|
| CBFA2T3  | 5 | chr16 |
| MACROD2  | 5 | chr20 |
| AES      | 5 | chr19 |
| DLEU7    | 5 | chr13 |
| FRMD1    | 4 | chr6  |
| CACNA1H  | 4 | chr16 |
| SLC12A7  | 4 | chr5  |
| CBFA2T3  | 4 | chr16 |
| BCYRN1   | 4 | chrX  |
| C11orf44 | 4 | chr11 |
| DLGAP2   | 4 | chr8  |
| TPPP     | 4 | chr5  |
| BRSK2    | 4 | chr11 |
| CHFR     | 4 | chr12 |
| CTNNA3   | 4 | chr10 |
| DMD      | 4 | chrX  |
| CAGE1    | 4 | chr6  |
| LYRM4    | 4 | chr6  |
| CDH4     | 4 | chr20 |
| DYDC1    | 4 | chr10 |
| DYDC2    | 4 | chr10 |
| NFATC1   | 4 | chr18 |
| RPRD2    | 4 | chr1  |
| KCNQ2    | 3 | chr20 |
| LHFPL2   | 3 | chr5  |
| MYOM2    | 3 | chr8  |
| PHACTR3  | 3 | chr20 |
| ADAMTS13 | 3 | chr9  |
| PNPLA7   | 3 | chr9  |
| MYO1F    | 3 | chr19 |
| COL4A5   | 3 | chrX  |
| ADAMTS2  | 3 | chr5  |
| FGF13    | 3 | chrX  |
| LHX6     | 3 | chr9  |
| CEP112   | 3 | chr17 |
| FKBP9    | 3 | chr7  |
| KANK1    | 3 | chr9  |
| JAG1     | 3 | chr20 |
| ZDHHC14  | 3 | chr6  |
| EIF4G3   | 3 | chr1  |
| KDM4B    | 3 | chr19 |
| PXDN     | 3 | chr2  |
| MOB2     | 3 | chr11 |



|                |   |       |
|----------------|---|-------|
| CNOT1          | 3 | chr16 |
| CLYBL          | 3 | chr13 |
| ERICH1-AS1     | 3 | chr8  |
| CAPN10         | 3 | chr2  |
| BLOC1S5        | 3 | chr6  |
| AFMID          | 3 | chr17 |
| FRMD1          | 3 | chr6  |
| TSNARE1        | 3 | chr8  |
| LARP1B         | 3 | chr4  |
| HMGA1P7        | 3 | chr6  |
| ABCA7          | 3 | chr19 |
| BRSK2          | 3 | chr11 |
| SOX13          | 3 | chr1  |
| FLG            | 3 | chr1  |
| PRDM16         | 3 | chr1  |
| ANKRD24        | 3 | chr19 |
| TNRC18         | 3 | chr7  |
| GALNTL6        | 3 | chr4  |
| EEF1E1-MUTED   | 3 | chr6  |
| BLOC1S5-TXNDC5 | 3 | chr6  |
| SURF6          | 3 | chr9  |
| ATP8B4         | 3 | chr15 |
| WWOX           | 3 | chr16 |
| DMD            | 3 | chrX  |
| C7orf50        | 3 | chr7  |
| SHANK2         | 3 | chr11 |
| MYBPC2         | 3 | chr19 |
| TMEM121        | 3 | chr14 |
| AMZ1           | 3 | chr7  |
| HDAC4          | 3 | chr2  |
| PHF21B         | 3 | chr22 |
| JMY            | 3 | chr5  |
| FAM189A1       | 3 | chr15 |
| PCSK6          | 3 | chr15 |
| IL1RAPL1       | 3 | chrX  |
| NRXN1          | 3 | chr2  |
| PPFIA3         | 3 | chr19 |
| LINGO2         | 3 | chr9  |
| KDM2B          | 3 | chr12 |
| CACNA1G        | 3 | chr17 |
| THEG           | 3 | chr19 |
| PROSER2        | 3 | chr10 |
| SDK2           | 3 | chr17 |

|              |   |       |
|--------------|---|-------|
| PIEZO1       | 3 | chr16 |
| ASTN2        | 2 | chr9  |
| RAB11FIP3    | 2 | chr16 |
| FANCA        | 2 | chr16 |
| RGPD1        | 2 | chr2  |
| HSH2D        | 2 | chr19 |
| ADAMTS17     | 2 | chr15 |
| MYRF         | 2 | chr11 |
| PCNXL2       | 2 | chr1  |
| AFMID        | 2 | chr17 |
| C20orf85     | 2 | chr20 |
| FGF12        | 2 | chr3  |
| AP3D1        | 2 | chr19 |
| NTM          | 2 | chr11 |
| LOC100499194 | 2 | chr2  |
| CHST9        | 2 | chr18 |
| UGT1A6       | 2 | chr2  |
| DLG2         | 2 | chr11 |
| INF2         | 2 | chr14 |
| TSG1         | 2 | chr6  |
| C17orf107    | 2 | chr17 |
| SYT1         | 2 | chr12 |
| SYNDIG1      | 2 | chr20 |
| ABO          | 2 | chr9  |
| CTSD         | 2 | chr11 |
| CHRNE        | 2 | chr17 |
| NXN          | 2 | chr17 |
| UGT1A8       | 2 | chr2  |
| PQLC1        | 2 | chr18 |
| ZNF57        | 2 | chr19 |
| LINC00616    | 2 | chr4  |
| MAP2K2       | 2 | chr19 |
| COL14A1      | 2 | chr8  |
| B3GNTL1      | 2 | chr17 |
| KAT2B        | 2 | chr3  |
| DNAJB13      | 2 | chr11 |
| RTL1         | 2 | chr14 |
| DIDO1        | 2 | chr20 |
| XRN2         | 2 | chr20 |
| LPP          | 2 | chr3  |
| KIR3DX1      | 2 | chr19 |
| B4GALNT4     | 2 | chr11 |
| SLC35E2      | 2 | chr1  |

|               |   |       |
|---------------|---|-------|
| PCNT          | 2 | chr21 |
| AKAP12        | 2 | chr6  |
| PPP1R15A      | 2 | chr19 |
| ANK1          | 2 | chr8  |
| GRK5          | 2 | chr10 |
| GABRA5        | 2 | chr15 |
| CLN6          | 2 | chr15 |
| RBMS3         | 2 | chr3  |
| LINC00200     | 2 | chr10 |
| ACTL9         | 2 | chr19 |
| HRNR          | 2 | chr1  |
| RPTOR         | 2 | chr17 |
| CNTNAP2       | 2 | chr7  |
| ANP32E        | 2 | chr1  |
| SAMD12        | 2 | chr8  |
| CPLX1         | 2 | chr4  |
| LTBP1         | 2 | chr2  |
| MAGIX         | 2 | chrX  |
| FLI1          | 2 | chr11 |
| EHMT1         | 2 | chr9  |
| TNC           | 2 | chr9  |
| STON1-GTF2A1L | 2 | chr2  |
| CAMK1D        | 2 | chr10 |
| RAB36         | 2 | chr22 |
| COL19A1       | 2 | chr6  |
| ZFHX3         | 2 | chr16 |
| ABCC5         | 2 | chr3  |
| SHISA6        | 2 | chr17 |
| PEAR1         | 2 | chr1  |
| ANO2          | 2 | chr12 |
| NFIC          | 2 | chr19 |
| CNRIP1        | 2 | chr2  |
| ARID4B        | 2 | chr1  |
| SNX25         | 2 | chr4  |
| ENOSF1        | 2 | chr18 |
| NRXN1         | 2 | chr2  |
| SHB           | 2 | chr9  |
| MCPH1         | 2 | chr8  |
| ASB18         | 2 | chr2  |
| ADARB2-AS1    | 2 | chr10 |
| MMP25         | 2 | chr16 |
| TP73          | 2 | chr1  |
| TMEM201       | 2 | chr1  |

|          |   |       |
|----------|---|-------|
| NPEPL1   | 2 | chr20 |
| LPHN1    | 2 | chr19 |
| FAM213B  | 2 | chr1  |
| GABRG3   | 2 | chr15 |
| SBNO2    | 2 | chr19 |
| HELB     | 2 | chr12 |
| UGT1A4   | 2 | chr2  |
| DOK6     | 2 | chr18 |
| SYN3     | 2 | chr22 |
| SF3B3    | 2 | chr16 |
| LDB2     | 2 | chr4  |
| FAM184A  | 2 | chr6  |
| NTN1     | 2 | chr17 |
| DTNBP1   | 2 | chr6  |
| PPP2R5C  | 2 | chr14 |
| PRKAG2   | 2 | chr7  |
| BEND3    | 2 | chr6  |
| CNOT1    | 2 | chr16 |
| COLEC11  | 2 | chr2  |
| UGT1A7   | 2 | chr2  |
| COL5A1   | 2 | chr9  |
| UGT1A9   | 2 | chr2  |
| FZR1     | 2 | chr19 |
| CFDP1    | 2 | chr16 |
| TSPAN9   | 2 | chr12 |
| ELFN1    | 2 | chr7  |
| XKR6     | 2 | chr8  |
| BACH2    | 2 | chr6  |
| ZC3H12D  | 2 | chr6  |
| LAMC3    | 2 | chr9  |
| CWF19L2  | 2 | chr11 |
| KCNT1    | 2 | chr9  |
| PSME3    | 2 | chr17 |
| MAGI1    | 2 | chr3  |
| COL23A1  | 2 | chr5  |
| ACSF3    | 2 | chr16 |
| SLC47A1  | 2 | chr17 |
| DRD5     | 2 | chr4  |
| UNC79    | 2 | chr14 |
| KIAA1217 | 2 | chr10 |
| ERLEC1   | 2 | chr2  |
| MYH10    | 2 | chr17 |
| TTLL6    | 2 | chr17 |

|              |   |       |
|--------------|---|-------|
| UGT1A10      | 2 | chr2  |
| WDR4         | 2 | chr21 |
| TIAM2        | 2 | chr6  |
| DMD          | 2 | chrX  |
| CACNA1C      | 2 | chr12 |
| ATP10A       | 2 | chr15 |
| TAF1C        | 2 | chr16 |
| VTI1A        | 2 | chr10 |
| LRRC4C       | 2 | chr11 |
| GOLGA3       | 2 | chr12 |
| AGPS         | 2 | chr2  |
| HCN4         | 2 | chr15 |
| RASA3        | 2 | chr13 |
| NEBL         | 2 | chr10 |
| SENP5        | 2 | chr3  |
| STX16-NPEPL1 | 2 | chr20 |
| VAMP5        | 2 | chr2  |
| SYT2         | 2 | chr1  |
| PCSK6        | 2 | chr15 |
| MAEA         | 2 | chr4  |
| SYMPK        | 2 | chr19 |
| NDE1         | 2 | chr16 |
| KIF26A       | 2 | chr14 |
| TSSC1        | 2 | chr2  |
| CCNY         | 2 | chr10 |
| ATP9A        | 2 | chr20 |
| KCNB2        | 2 | chr8  |
| SCRIB        | 2 | chr8  |
| UGT1A5       | 2 | chr2  |
| GREM1        | 2 | chr15 |
| VIPR2        | 2 | chr7  |
| SDK1         | 2 | chr7  |
| IFT140       | 2 | chr16 |
| CABLES2      | 2 | chr20 |
| KCNK17       | 2 | chr6  |
| GEMIN7       | 2 | chr19 |
| MSRA         | 2 | chr8  |
| ARRDC5       | 2 | chr19 |
| CXCL13       | 2 | chr4  |
| CNTN4        | 2 | chr3  |
| LRP5         | 2 | chr11 |
| TAF4         | 2 | chr20 |
| EYA4         | 2 | chr6  |

|            |   |       |
|------------|---|-------|
| NLRP8      | 2 | chr19 |
| HDAC9      | 2 | chr7  |
| MSANTD1    | 2 | chr4  |
| UGT1A3     | 2 | chr2  |
| GPR75-ASB3 | 2 | chr2  |
| TBCD       | 2 | chr17 |
| LINC00673  | 2 | chr17 |
| CXCR3      | 2 | chrX  |
| PIGG       | 2 | chr4  |
| LOC286238  | 2 | chr9  |
| SIRT1      | 2 | chr10 |
| CACNA1A    | 2 | chr19 |
| ACSM1      | 2 | chr16 |
| SLC16A10   | 2 | chr6  |
| DAGLA      | 2 | chr11 |
| SPPL2B     | 2 | chr19 |
| MYO7A      | 2 | chr11 |
| FANCC      | 2 | chr9  |
| SCAMP4     | 2 | chr19 |
| STK32B     | 2 | chr4  |
| TMEM132C   | 2 | chr12 |
| BAZ1A      | 2 | chr14 |
| PGBD5      | 2 | chr1  |
| DYSF       | 2 | chr2  |
| TYW1       | 2 | chr7  |
| TPCN2      | 2 | chr11 |
| ATAD3C     | 2 | chr1  |
| TEAD4      | 2 | chr12 |
| LHX3       | 2 | chr9  |
| LOXHD1     | 2 | chr18 |
| ART3       | 2 | chr4  |
| DIP2C      | 2 | chr10 |
| PRKCZ      | 2 | chr1  |
| DPY19L2P2  | 2 | chr7  |
| SLC6A3     | 2 | chr5  |
| CDH4       | 2 | chr20 |
| MACROD2    | 2 | chr20 |
| PARVB      | 2 | chr22 |
| ZDHHC8P1   | 2 | chr22 |
| SSTR5      | 2 | chr16 |
| CAMTA1     | 2 | chr1  |
| CACNA1I    | 2 | chr22 |
| EP400      | 2 | chr12 |

|              |   |       |
|--------------|---|-------|
| GRAMD4       | 2 | chr22 |
| 9-Sep        | 2 | chr17 |
| ZNF611       | 2 | chr19 |
| LARGE        | 2 | chr22 |
| NOV          | 2 | chr8  |
| WBSCR17      | 2 | chr7  |
| ATG4B        | 2 | chr2  |
| PKNOX2       | 2 | chr11 |
| SYT14        | 2 | chr1  |
| DNMT1        | 2 | chr19 |
| POR          | 2 | chr7  |
| EPHA8        | 2 | chr1  |
| IFT27        | 2 | chr22 |
| KANK1        | 2 | chr9  |
| LOC100133612 | 2 | chr1  |
| ZDHHC19      | 2 | chr3  |
| HEATR2       | 2 | chr7  |
| PKD1L2       | 2 | chr16 |
| MMEL1        | 2 | chr1  |
| PLOD3        | 2 | chr7  |
| PTK7         | 2 | chr6  |
| DPYD         | 2 | chr1  |
| PTPRT        | 2 | chr20 |
| KIAA1967     | 2 | chr8  |
| FLJ12825     | 2 | chr12 |
| YWHAE        | 2 | chr17 |
| SYNPR        | 2 | chr3  |
| CTBP2        | 2 | chr10 |
| TTLL1        | 2 | chr22 |
| LIMA1        | 2 | chr12 |
| PRKX         | 1 | chrX  |
| BCAT2        | 1 | chr19 |
| LCN1         | 1 | chr9  |
| PRSS21       | 1 | chr16 |
| C12orf36     | 1 | chr12 |
| SFTA3        | 1 | chr14 |
| C1orf141     | 1 | chr1  |
| CELF5        | 1 | chr19 |
| TMEM233      | 1 | chr12 |
| IAH1         | 1 | chr2  |
| TAF3         | 1 | chr10 |
| TAF2         | 1 | chr8  |
| CEP70        | 1 | chr3  |

|              |   |       |
|--------------|---|-------|
| COL8A1       | 1 | chr3  |
| STOX2        | 1 | chr4  |
| KIF1A        | 1 | chr2  |
| DIS3L2       | 1 | chr2  |
| GABRD        | 1 | chr1  |
| CDK10        | 1 | chr16 |
| TUB          | 1 | chr11 |
| C1orf159     | 1 | chr1  |
| DOCK10       | 1 | chr2  |
| TBC1D16      | 1 | chr17 |
| PCDHGA3      | 1 | chr5  |
| TMEM132D     | 1 | chr12 |
| GIGYF2       | 1 | chr2  |
| EXD3         | 1 | chr9  |
| PAR6G-AS1    | 1 | chr18 |
| LOC100128946 | 1 | chr22 |
| DTYMK        | 1 | chr2  |
| NNT          | 1 | chr5  |
| APOBEC3H     | 1 | chr22 |
| PCDHGB3      | 1 | chr5  |
| ADK          | 1 | chr10 |
| RINL         | 1 | chr19 |
| KNDC1        | 1 | chr10 |
| LCMT1        | 1 | chr16 |
| FUT3         | 1 | chr19 |
| PGP          | 1 | chr16 |
| EIF4G3       | 1 | chr1  |
| OR8U8        | 1 | chr11 |
| RAB31        | 1 | chr18 |
| GNA12        | 1 | chr7  |
| OTUD7A       | 1 | chr15 |
| GLI2         | 1 | chr2  |
| CDC7         | 1 | chr1  |
| DNAH9        | 1 | chr17 |
| PLIN4        | 1 | chr19 |
| UVSSA        | 1 | chr4  |
| FADS2        | 1 | chr11 |
| POMT2        | 1 | chr14 |
| PRR5         | 1 | chr22 |
| SLC9A3       | 1 | chr5  |
| HNF4A        | 1 | chr20 |
| CMC1         | 1 | chr3  |
| UBXN6        | 1 | chr19 |



|           |   |       |
|-----------|---|-------|
| EFCAB2    | 1 | chr1  |
| ZMYM1     | 1 | chr1  |
| GRM2      | 1 | chr3  |
| ANKRD13C  | 1 | chr1  |
| SIK1      | 1 | chr21 |
| TSC22D1   | 1 | chr13 |
| OSBPL5    | 1 | chr11 |
| CNTRL     | 1 | chr9  |
| MRPL28    | 1 | chr16 |
| GPC1      | 1 | chr2  |
| SRSF4     | 1 | chr1  |
| RHBDL2    | 1 | chr1  |
| DENND2A   | 1 | chr7  |
| RPH3AL    | 1 | chr17 |
| COL4A2    | 1 | chr13 |
| LOC284395 | 1 | chr19 |
| AK8       | 1 | chr9  |
| ATG14     | 1 | chr14 |
| EPPK1     | 1 | chr8  |
| TRPM4     | 1 | chr19 |
| WNT9A     | 1 | chr1  |
| LRRC27    | 1 | chr10 |
| DGKE      | 1 | chr17 |
| SBF1      | 1 | chr22 |
| COL17A1   | 1 | chr10 |
| SH3TC1    | 1 | chr4  |
| PTCHD2    | 1 | chr1  |
| CHD1      | 1 | chr5  |
| GLP2R     | 1 | chr17 |
| CTNND1    | 1 | chr11 |
| TGFBR3    | 1 | chr1  |
| ANO10     | 1 | chr3  |
| EYS       | 1 | chr6  |
| MRTO4     | 1 | chr1  |
| HRH2      | 1 | chr5  |
| PRR12     | 1 | chr19 |
| MEF2C     | 1 | chr5  |
| STMN3     | 1 | chr20 |
| GLTSCR1L  | 1 | chr6  |
| LRP12     | 1 | chr8  |
| BCAS4     | 1 | chr20 |
| NXF4      | 1 | chrX  |
| AGMO      | 1 | chr7  |

|           |   |       |
|-----------|---|-------|
| PAX7      | 1 | chr1  |
| DAG1      | 1 | chr3  |
| GRID2     | 1 | chr4  |
| ADAMTS6   | 1 | chr5  |
| ARHGAP33  | 1 | chr19 |
| GMPR      | 1 | chr6  |
| UNC13D    | 1 | chr17 |
| WASF3     | 1 | chr13 |
| LUZP2     | 1 | chr11 |
| SULF2     | 1 | chr20 |
| OR7E156P  | 1 | chr13 |
| MED29     | 1 | chr19 |
| TENM2     | 1 | chr5  |
| TM7SF3    | 1 | chr12 |
| MYEOV     | 1 | chr11 |
| SPATA2    | 1 | chr20 |
| OTX2-AS1  | 1 | chr14 |
| HELLS     | 1 | chr10 |
| CCDC171   | 1 | chr9  |
| CCDC61    | 1 | chr19 |
| BFSP2     | 1 | chr3  |
| OLFM2     | 1 | chr19 |
| GABRA1    | 1 | chr5  |
| TGIF1     | 1 | chr18 |
| TRAPPC9   | 1 | chr8  |
| SH3GL1    | 1 | chr19 |
| PIR-FIGF  | 1 | chrX  |
| ERH       | 1 | chr14 |
| IFNAR1    | 1 | chr21 |
| ATP2B3    | 1 | chrX  |
| SCTR      | 1 | chr2  |
| PMF1      | 1 | chr1  |
| L3MBTL4   | 1 | chr18 |
| RIMS2     | 1 | chr8  |
| RTEL1     | 1 | chr20 |
| LRRC49    | 1 | chr15 |
| LOC283692 | 1 | chr15 |
| TBC1D20   | 1 | chr20 |
| HCN1      | 1 | chr5  |
| OTUB1     | 1 | chr11 |
| GRM6      | 1 | chr5  |
| LAMA4     | 1 | chr6  |
| NAGPA     | 1 | chr16 |

|             |   |       |
|-------------|---|-------|
| EPB41L4B    | 1 | chr9  |
| BTNL9       | 1 | chr5  |
| FPGT-TNNI3K | 1 | chr1  |
| PDE3A       | 1 | chr12 |
| MUC17       | 1 | chr7  |
| MRC2        | 1 | chr17 |
| RBMS1       | 1 | chr2  |
| SORCS1      | 1 | chr10 |
| UBE2H       | 1 | chr7  |
| ABCA2       | 1 | chr9  |
| PCDHGA1     | 1 | chr5  |
| MIR548AN    | 1 | chr13 |
| XXYLT1      | 1 | chr3  |
| AP3S2       | 1 | chr15 |
| LINC00624   | 1 | chr1  |
| ATP2B2      | 1 | chr3  |
| GATA4       | 1 | chr8  |
| KIAA0247    | 1 | chr14 |
| NXN         | 1 | chr17 |
| C1QTNF2     | 1 | chr5  |
| CEP120      | 1 | chr5  |
| SLC5A5      | 1 | chr19 |
| EMC1        | 1 | chr1  |
| KLHL15      | 1 | chrX  |
| TANC1       | 1 | chr2  |
| SCN2A       | 1 | chr2  |
| AGO4        | 1 | chr1  |
| WDR19       | 1 | chr4  |
| ZFP1        | 1 | chr16 |
| SNTG2       | 1 | chr2  |
| CRLF1       | 1 | chr19 |
| SYTL3       | 1 | chr6  |
| PLXNB3      | 1 | chrX  |
| C1QTNF7     | 1 | chr4  |
| PCDHGA2     | 1 | chr5  |
| C6orf123    | 1 | chr6  |
| C6orf147    | 1 | chr6  |
| FAM108C1    | 1 | chr15 |
| MOV10L1     | 1 | chr22 |
| SH3BP2      | 1 | chr4  |
| HLCS        | 1 | chr21 |
| CLIP2       | 1 | chr7  |
| EPS8L1      | 1 | chr19 |

|              |   |       |
|--------------|---|-------|
| PCDHGB1      | 1 | chr5  |
| HHIPL2       | 1 | chr1  |
| FGFBP2       | 1 | chr4  |
| ADAMTSL1     | 1 | chr9  |
| CCT3         | 1 | chr1  |
| PRKAR1B      | 1 | chr7  |
| SFRP1        | 1 | chr8  |
| EIF2AK4      | 1 | chr15 |
| PCDHGB2      | 1 | chr5  |
| ZNF815P      | 1 | chr7  |
| PRKXP1       | 1 | chr15 |
| RAB11FIP3    | 1 | chr16 |
| COA1         | 1 | chr7  |
| CSNK1A1L     | 1 | chr13 |
| AP1G1        | 1 | chr16 |
| CYTH4        | 1 | chr22 |
| CORO7        | 1 | chr16 |
| PLEKHH2      | 1 | chr2  |
| C12orf5      | 1 | chr12 |
| APOH         | 1 | chr17 |
| TPO          | 1 | chr2  |
| ARHGAP39     | 1 | chr8  |
| MSRB3        | 1 | chr12 |
| ASB13        | 1 | chr10 |
| TRIM6        | 1 | chr11 |
| QRICH2       | 1 | chr17 |
| PADI6        | 1 | chr1  |
| NAV1         | 1 | chr1  |
| BSN          | 1 | chr3  |
| TRPM2        | 1 | chr21 |
| SOD3         | 1 | chr4  |
| ZNF208       | 1 | chr19 |
| C2orf83      | 1 | chr2  |
| RIPK4        | 1 | chr21 |
| TAZ          | 1 | chrX  |
| LOC100130691 | 1 | chr2  |
| RYR1         | 1 | chr19 |
| SLC35B4      | 1 | chr7  |
| SARM1        | 1 | chr17 |
| ERI3         | 1 | chr1  |
| SIPA1L3      | 1 | chr19 |
| TUFT1        | 1 | chr1  |
| CHRM3        | 1 | chr1  |

|           |   |       |
|-----------|---|-------|
| PI16      | 1 | chr6  |
| SLCO3A1   | 1 | chr15 |
| ITPR2     | 1 | chr12 |
| TNPO3     | 1 | chr7  |
| PCCA      | 1 | chr13 |
| FOSB      | 1 | chr19 |
| CCDC148   | 1 | chr2  |
| ISM1      | 1 | chr20 |
| ANK2      | 1 | chr4  |
| ENTPD8    | 1 | chr9  |
| FAM19A1   | 1 | chr3  |
| AK1       | 1 | chr9  |
| LOC389634 | 1 | chr12 |
| TBX15     | 1 | chr1  |
| OGFR      | 1 | chr20 |
| TSPAN11   | 1 | chr12 |
| PROC      | 1 | chr2  |
| C21orf2   | 1 | chr21 |
| ERMAP     | 1 | chr1  |
| OCA2      | 1 | chr15 |
| ACAP1     | 1 | chr17 |
| PIR       | 1 | chrX  |
| MLLT10    | 1 | chr10 |
| FAM149B1  | 1 | chr10 |
| FERMT1    | 1 | chr20 |
| MEI1      | 1 | chr22 |
| CCDC102A  | 1 | chr16 |
| FRRS1L    | 1 | chr9  |
| DPP10     | 1 | chr2  |
| 3-Sep     | 1 | chr22 |
| SEMA6A    | 1 | chr5  |
| PDSS1     | 1 | chr10 |
| TSPO      | 1 | chr22 |
| MIR548G   | 1 | chr3  |
| DGKQ      | 1 | chr4  |
| SLC38A10  | 1 | chr17 |
| PKD1L2    | 1 | chr16 |
| GALNS     | 1 | chr16 |
| LRRC1     | 1 | chr6  |
| BRWD1     | 1 | chr21 |
| LRRC6     | 1 | chr8  |
| AKT2      | 1 | chr19 |
| EPHA3     | 1 | chr3  |

|                |   |       |
|----------------|---|-------|
| TRAF3IP2       | 1 | chr6  |
| CNN2           | 1 | chr19 |
| DNAH2          | 1 | chr17 |
| LOC100507003   | 1 | chr19 |
| HTR6           | 1 | chr1  |
| CEP72          | 1 | chr5  |
| C14orf159      | 1 | chr14 |
| MYCBPAP        | 1 | chr17 |
| RHPN1          | 1 | chr8  |
| ESR1           | 1 | chr6  |
| GLYR1          | 1 | chr16 |
| ATF7           | 1 | chr12 |
| LMF1           | 1 | chr16 |
| ARMCX5-GPRASP2 | 1 | chrX  |
| BMP6           | 1 | chr6  |
| INTS1          | 1 | chr7  |
| COX4I2         | 1 | chr20 |
| PRUNE2         | 1 | chr9  |
| CIT            | 1 | chr12 |
| LOC100507373   | 1 | chr19 |
| FIBCD1         | 1 | chr9  |
| FAM110C        | 1 | chr2  |
| PRKCZ          | 1 | chr1  |
| AQP1           | 1 | chr7  |
| RNF26          | 1 | chr11 |
| SEMA4B         | 1 | chr15 |
| CDK16          | 1 | chrX  |
| NOD1           | 1 | chr7  |
| SEC1P          | 1 | chr19 |
| CCDC63         | 1 | chr12 |
| FAM163A        | 1 | chr1  |
| FSTL3          | 1 | chr19 |
| EPHA1-AS1      | 1 | chr7  |
| SYBU           | 1 | chr8  |
| MORN1          | 1 | chr1  |
| IRX6           | 1 | chr16 |
| CANX           | 1 | chr5  |
| STXBP6         | 1 | chr14 |
| TMED10         | 1 | chr14 |
| VAT1L          | 1 | chr16 |
| TMPRSS15       | 1 | chr21 |
| PLEKHO2        | 1 | chr15 |
| LSAMP          | 1 | chr3  |

|             |   |       |
|-------------|---|-------|
| MMD2        | 1 | chr7  |
| MGAT3       | 1 | chr22 |
| BANP        | 1 | chr16 |
| MAT1A       | 1 | chr10 |
| SLC4A7      | 1 | chr3  |
| TSHZ3       | 1 | chr19 |
| ENO4        | 1 | chr10 |
| CADM4       | 1 | chr19 |
| SPTB        | 1 | chr14 |
| RAB30       | 1 | chr11 |
| PTBP1       | 1 | chr19 |
| DHX34       | 1 | chr19 |
| AGAP1       | 1 | chr2  |
| SOSTDC1     | 1 | chr7  |
| GLT25D2     | 1 | chr1  |
| SYS1-DBNDD2 | 1 | chr20 |
| MDGA2       | 1 | chr14 |
| CDC42SE2    | 1 | chr5  |
| NUBPL       | 1 | chr14 |
| CAMK2D      | 1 | chr4  |
| RAB40B      | 1 | chr17 |
| DCHS2       | 1 | chr4  |
| ZNF492      | 1 | chr19 |
| CCDC154     | 1 | chr16 |
| RPF2        | 1 | chr6  |
| POLR1E      | 1 | chr9  |
| TBCE        | 1 | chr1  |
| TFAP4       | 1 | chr16 |
| CATSPERD    | 1 | chr19 |
| WWOX        | 1 | chr16 |
| MSN         | 1 | chrX  |
| TRIM62      | 1 | chr1  |
| ZMAT4       | 1 | chr8  |
| CPSF3L      | 1 | chr1  |
| MIR143HG    | 1 | chr5  |
| ZNF578      | 1 | chr19 |
| ATP4B       | 1 | chr13 |
| TMPRSS11F   | 1 | chr4  |
| AIG1        | 1 | chr6  |
| ROS1        | 1 | chr6  |
| CUEDC1      | 1 | chr17 |
| CNP         | 1 | chr17 |
| SCT         | 1 | chr11 |

|               |   |       |
|---------------|---|-------|
| ADCY3         | 1 | chr2  |
| PHF13         | 1 | chr1  |
| TRPS1         | 1 | chr8  |
| OPALIN        | 1 | chr10 |
| INF2          | 1 | chr14 |
| CERS1         | 1 | chr19 |
| ZNF276        | 1 | chr16 |
| PRRT1         | 1 | chr6  |
| HELZ2         | 1 | chr20 |
| AKR1C3        | 1 | chr10 |
| CADPS         | 1 | chr3  |
| RABL6         | 1 | chr9  |
| MLXIP         | 1 | chr12 |
| TMEM204       | 1 | chr16 |
| TCERG1L       | 1 | chr10 |
| VWA3A         | 1 | chr16 |
| MUC4          | 1 | chr3  |
| AGT           | 1 | chr1  |
| OXER1         | 1 | chr2  |
| NCOR2         | 1 | chr12 |
| TMEM72-AS1    | 1 | chr10 |
| GREM2         | 1 | chr1  |
| TRDN          | 1 | chr6  |
| CBX5          | 1 | chr12 |
| SYAP1         | 1 | chrX  |
| NR5A1         | 1 | chr9  |
| KLF17         | 1 | chr1  |
| TMEM51-AS1    | 1 | chr1  |
| WDR27         | 1 | chr6  |
| CORO7-PAM16   | 1 | chr16 |
| GAREML        | 1 | chr2  |
| MAP3K12       | 1 | chr12 |
| SYNJ2BP-COX16 | 1 | chr14 |
| SLC17A1       | 1 | chr6  |
| OBSCN         | 1 | chr1  |
| EHMT1         | 1 | chr9  |
| TRAF3IP2-AS1  | 1 | chr6  |
| LRRC15        | 1 | chr3  |
| STK32C        | 1 | chr10 |
| FTH1P18       | 1 | chrX  |
| NT5DC3        | 1 | chr12 |
| ANO3          | 1 | chr11 |
| RADIL         | 1 | chr7  |



|           |   |       |
|-----------|---|-------|
| KLHL30    | 1 | chr2  |
| ACOT11    | 1 | chr1  |
| GPC5      | 1 | chr13 |
| KLHDC10   | 1 | chr7  |
| COL11A1   | 1 | chr1  |
| IL1RAPL2  | 1 | chrX  |
| COL6A2    | 1 | chr21 |
| GMDS      | 1 | chr6  |
| SVIL      | 1 | chr10 |
| NPSR1     | 1 | chr7  |
| GAREM     | 1 | chr18 |
| HS3ST4    | 1 | chr16 |
| CDHR2     | 1 | chr5  |
| PAPD5     | 1 | chr16 |
| C20orf26  | 1 | chr20 |
| GAD2      | 1 | chr10 |
| DNAH17    | 1 | chr17 |
| CDRT1     | 1 | chr17 |
| ZNF550    | 1 | chr19 |
| MRPL54    | 1 | chr19 |
| TTC7B     | 1 | chr14 |
| FAT2      | 1 | chr5  |
| PARP8     | 1 | chr5  |
| SLC47A2   | 1 | chr17 |
| MIPEP     | 1 | chr13 |
| SPAST     | 1 | chr2  |
| RAB11FIP4 | 1 | chr17 |
| SPON1     | 1 | chr11 |
| FRMPD4    | 1 | chrX  |
| WISP1     | 1 | chr8  |
| LYPD2     | 1 | chr8  |
| 10-Mar    | 1 | chr17 |
| SLC16A6   | 1 | chr17 |
| MAGEA4    | 1 | chrX  |
| PDE4B     | 1 | chr1  |
| SPN       | 1 | chr16 |
| NPY       | 1 | chr7  |
| EBF4      | 1 | chr20 |
| MYH7B     | 1 | chr20 |
| EPB41L2   | 1 | chr6  |
| CCDC65    | 1 | chr12 |
| LOC285441 | 1 | chr4  |
| ARIH1     | 1 | chr15 |

|               |   |       |
|---------------|---|-------|
| DENND1A       | 1 | chr9  |
| WDR85         | 1 | chr9  |
| IL32          | 1 | chr16 |
| SUMF1         | 1 | chr3  |
| PFDN1         | 1 | chr5  |
| MIR5694       | 1 | chr10 |
| GAMT          | 1 | chr19 |
| DLGAP3        | 1 | chr1  |
| SLC29A4       | 1 | chr7  |
| S1PR2         | 1 | chr19 |
| ROBO2         | 1 | chr3  |
| OLFML2B       | 1 | chr1  |
| BEND2         | 1 | chrX  |
| KLHL29        | 1 | chr2  |
| ZNF7          | 1 | chr8  |
| LRRTM4        | 1 | chr2  |
| MCOLN1        | 1 | chr19 |
| DYSF          | 1 | chr2  |
| MYH14         | 1 | chr19 |
| MEFV          | 1 | chr16 |
| SLC7A5        | 1 | chr16 |
| STON1-GTF2A1L | 1 | chr2  |
| RHPN1-AS1     | 1 | chr8  |
| PTCHD3        | 1 | chr10 |
| IDO2          | 1 | chr8  |
| TP73          | 1 | chr1  |
| PDPR          | 1 | chr16 |
| ARSF          | 1 | chrX  |
| OTOA          | 1 | chr16 |
| CTNNA2        | 1 | chr2  |
| GRWD1         | 1 | chr19 |
| QSOX2         | 1 | chr9  |
| GRIN2B        | 1 | chr12 |
| SCFD2         | 1 | chr4  |
| WDR37         | 1 | chr10 |
| KIAA1751      | 1 | chr1  |
| DHX8          | 1 | chr17 |
| PIBF1         | 1 | chr13 |
| CELF6         | 1 | chr15 |
| MAD2L2        | 1 | chr1  |
| CHRNA1        | 1 | chr17 |
| GABRB3        | 1 | chr15 |
| UBXN11        | 1 | chr1  |

|              |   |       |
|--------------|---|-------|
| TRPM8        | 1 | chr2  |
| HTT          | 1 | chr4  |
| TMF1         | 1 | chr3  |
| SPATA13      | 1 | chr13 |
| AIDA         | 1 | chr1  |
| STON1        | 1 | chr2  |
| SHROOM3      | 1 | chr4  |
| SLC2A6       | 1 | chr9  |
| DNAH7        | 1 | chr2  |
| BCR          | 1 | chr22 |
| GSX1         | 1 | chr13 |
| EPB41        | 1 | chr1  |
| BAIAP2       | 1 | chr17 |
| LOC339166    | 1 | chr17 |
| RYR3         | 1 | chr15 |
| GBF1         | 1 | chr10 |
| OPRD1        | 1 | chr1  |
| CPPED1       | 1 | chr16 |
| IQGAP1       | 1 | chr15 |
| MYO15A       | 1 | chr17 |
| VASH1        | 1 | chr14 |
| LRRK1        | 1 | chr15 |
| GNG7         | 1 | chr19 |
| PCP4L1       | 1 | chr1  |
| ZNF565       | 1 | chr19 |
| INADL        | 1 | chr1  |
| STX8         | 1 | chr17 |
| SETD1B       | 1 | chr12 |
| NALCN-AS1    | 1 | chr13 |
| ARRB2        | 1 | chr17 |
| MAP3K4       | 1 | chr6  |
| PRL          | 1 | chr6  |
| IGSF21       | 1 | chr1  |
| GATA1        | 1 | chrX  |
| PPAPDC3      | 1 | chr9  |
| TRIM6-TRIM34 | 1 | chr11 |
| SPNS2        | 1 | chr17 |
| NONO         | 1 | chrX  |
| TUBB3        | 1 | chr16 |
| USH2A        | 1 | chr1  |
| KIRREL2      | 1 | chr19 |
| CLIC2        | 1 | chrX  |
| HSPG2        | 1 | chr1  |

|               |   |       |
|---------------|---|-------|
| IGSF11        | 1 | chr3  |
| CLOCK         | 1 | chr4  |
| TUSC5         | 1 | chr17 |
| KRT72         | 1 | chr12 |
| PTPRO         | 1 | chr12 |
| PRIM2         | 1 | chr6  |
| TMPRSS11D     | 1 | chr4  |
| ENPP6         | 1 | chr4  |
| BCOR          | 1 | chrX  |
| FLVCR1        | 1 | chr1  |
| ARHGAP4       | 1 | chrX  |
| ZFYVE28       | 1 | chr4  |
| BIN3          | 1 | chr8  |
| DKFZp686K1684 | 1 | chr11 |
| DHDH          | 1 | chr19 |
| FGGY          | 1 | chr1  |
| PMF1-BGLAP    | 1 | chr1  |
| SLC2A5        | 1 | chr1  |
| CCM2          | 1 | chr7  |
| PUM1          | 1 | chr1  |
| SLC26A10      | 1 | chr12 |
| DKK3          | 1 | chr11 |
| PCDHGA6       | 1 | chr5  |
| CCDC155       | 1 | chr19 |
| MROH1         | 1 | chr8  |
| LANCL2        | 1 | chr7  |
| DEAF1         | 1 | chr11 |
| RBKS          | 1 | chr2  |
| SLC15A4       | 1 | chr12 |
| CAMK2B        | 1 | chr7  |
| TPK1          | 1 | chr7  |
| C1orf151-NBL1 | 1 | chr1  |
| ITGB7         | 1 | chr12 |
| IMPA2         | 1 | chr18 |
| FAM21A        | 1 | chr10 |
| MCOLN2        | 1 | chr1  |
| CACNB2        | 1 | chr10 |
| URGCP         | 1 | chr7  |
| NR1I2         | 1 | chr3  |
| BTBD11        | 1 | chr12 |
| FLJ43663      | 1 | chr7  |
| GALNT9        | 1 | chr12 |
| POP1          | 1 | chr8  |

|             |   |       |
|-------------|---|-------|
| FMN2        | 1 | chr1  |
| GRAMD1A     | 1 | chr19 |
| MAGEL2      | 1 | chr15 |
| TMEM192     | 1 | chr4  |
| CCNF        | 1 | chr16 |
| NGEF        | 1 | chr2  |
| PTER        | 1 | chr10 |
| ASGR2       | 1 | chr17 |
| SEC14L5     | 1 | chr16 |
| LOC285627   | 1 | chr5  |
| PODXL2      | 1 | chr3  |
| RFX1        | 1 | chr19 |
| GAL3ST2     | 1 | chr2  |
| TLX2        | 1 | chr2  |
| PLEKHA5     | 1 | chr12 |
| TTC40       | 1 | chr10 |
| PIGN        | 1 | chr18 |
| C1orf228    | 1 | chr1  |
| SLC5A4      | 1 | chr22 |
| ARNT2       | 1 | chr15 |
| SYT6        | 1 | chr1  |
| ELMO1       | 1 | chr7  |
| DCUN1D3     | 1 | chr16 |
| RGS7        | 1 | chr1  |
| TMX2-CTNND1 | 1 | chr11 |
| TIMD4       | 1 | chr5  |
| GNAL        | 1 | chr18 |
| FBXL20      | 1 | chr17 |
| LIMA1       | 1 | chr12 |
| PKP4        | 1 | chr2  |
| CDK11B      | 1 | chr1  |
| KIFC3       | 1 | chr16 |
| CSMD1       | 1 | chr8  |
| CASR        | 1 | chr3  |
| BCAP29      | 1 | chr7  |
| SLC7A9      | 1 | chr19 |
| STEAP3      | 1 | chr2  |
| FAM182B     | 1 | chr20 |
| TCEANC      | 1 | chrX  |
| MARK3       | 1 | chr14 |
| OLFM1       | 1 | chr9  |
| ZBTB11      | 1 | chr3  |
| PCDH19      | 1 | chrX  |

|              |   |       |
|--------------|---|-------|
| SORBS2       | 1 | chr4  |
| PRMT8        | 1 | chr12 |
| ABL1         | 1 | chr9  |
| BYSL         | 1 | chr6  |
| DTNB         | 1 | chr2  |
| TNFRSF1B     | 1 | chr1  |
| CYFIP1       | 1 | chr15 |
| PKD1         | 1 | chr16 |
| NDUFS7       | 1 | chr19 |
| HECTD4       | 1 | chr12 |
| CDH23        | 1 | chr10 |
| ZFYVE21      | 1 | chr14 |
| FLJ16171     | 1 | chr5  |
| AKR7L        | 1 | chr1  |
| MGMT         | 1 | chr10 |
| RMND1        | 1 | chr6  |
| FOXN3        | 1 | chr14 |
| ABAT         | 1 | chr16 |
| PCGF2        | 1 | chr17 |
| MAPK8IP2     | 1 | chr22 |
| MSI2         | 1 | chr17 |
| C2CD2        | 1 | chr21 |
| ARSG         | 1 | chr17 |
| PITPNM3      | 1 | chr17 |
| PCDHGA9      | 1 | chr5  |
| MMP17        | 1 | chr12 |
| SLC35F5      | 1 | chr2  |
| EPHB1        | 1 | chr3  |
| LOC100009676 | 1 | chr3  |
| NEBL         | 1 | chr10 |
| RFX2         | 1 | chr19 |
| CMIP         | 1 | chr16 |
| LOC100286922 | 1 | chr2  |
| ATP8A1       | 1 | chr4  |
| GUSBP2       | 1 | chr6  |
| DUSP13       | 1 | chr10 |
| FAT1         | 1 | chr4  |
| HMHA1        | 1 | chr19 |
| TENM4        | 1 | chr11 |
| PDE9A        | 1 | chr21 |
| MGRN1        | 1 | chr16 |
| DOCK4        | 1 | chr7  |
| FAM129C      | 1 | chr19 |

|           |   |       |
|-----------|---|-------|
| NRXN3     | 1 | chr14 |
| ZNF77     | 1 | chr19 |
| SKI       | 1 | chr1  |
| SYNM      | 1 | chr15 |
| DCTN2     | 1 | chr12 |
| TXN2      | 1 | chr22 |
| TTC34     | 1 | chr1  |
| FLRT1     | 1 | chr11 |
| LOC550113 | 1 | chr4  |
| PLA2G4E   | 1 | chr15 |
| RASGRF1   | 1 | chr15 |
| RPS7      | 1 | chr2  |
| CCDC129   | 1 | chr7  |
| NR2C1     | 1 | chr12 |
| RAPGEF3   | 1 | chr12 |
| GPR123    | 1 | chr10 |
| GRM5      | 1 | chr11 |
| ODF3L2    | 1 | chr19 |
| PDXDC2P   | 1 | chr16 |
| FGD3      | 1 | chr9  |
| INTS8     | 1 | chr8  |
| PEX5L     | 1 | chr3  |
| UBE2K     | 1 | chr4  |
| CABP1     | 1 | chr12 |
| NCAM2     | 1 | chr21 |
| ERC1      | 1 | chr12 |
| SYNJ2BP   | 1 | chr14 |
| RAB40C    | 1 | chr16 |
| SERPINH1  | 1 | chr11 |
| CASP7     | 1 | chr10 |
| PCDH9     | 1 | chr13 |
| BCAS3     | 1 | chr17 |
| EPHB6     | 1 | chr7  |
| PEX3      | 1 | chr6  |
| AIM1L     | 1 | chr1  |
| BEAN1     | 1 | chr16 |
| GAK       | 1 | chr4  |
| ERCC2     | 1 | chr19 |
| CDHR1     | 1 | chr10 |
| HAAO      | 1 | chr2  |
| MYBBP1A   | 1 | chr17 |
| PCDHGA4   | 1 | chr5  |
| GRM7      | 1 | chr3  |

|           |   |       |
|-----------|---|-------|
| AASDH     | 1 | chr4  |
| MYH3      | 1 | chr17 |
| AK5       | 1 | chr1  |
| PODN      | 1 | chr1  |
| NLRP2     | 1 | chr19 |
| BOC       | 1 | chr3  |
| TBC1D8    | 1 | chr2  |
| PNPT1     | 1 | chr2  |
| ALDH8A1   | 1 | chr6  |
| FAR1      | 1 | chr11 |
| SCAMP5    | 1 | chr15 |
| PDCD6     | 1 | chr5  |
| KCNAB2    | 1 | chr1  |
| KAZN      | 1 | chr1  |
| RGS12     | 1 | chr4  |
| KIF19     | 1 | chr17 |
| FAM229B   | 1 | chr6  |
| BANF2     | 1 | chr20 |
| KLHL6     | 1 | chr3  |
| MIR548W   | 1 | chr17 |
| KCND3     | 1 | chr1  |
| TPGS1     | 1 | chr19 |
| FARP1     | 1 | chr13 |
| ECT2L     | 1 | chr6  |
| PLA2G3    | 1 | chr22 |
| TIAM1     | 1 | chr21 |
| GRM3      | 1 | chr7  |
| APOC1     | 1 | chr19 |
| NLGN1     | 1 | chr3  |
| TXNRD2    | 1 | chr22 |
| LRRC20    | 1 | chr10 |
| OTOF      | 1 | chr2  |
| CUL3      | 1 | chr2  |
| GDF1      | 1 | chr19 |
| UBN1      | 1 | chr16 |
| CCDC85C   | 1 | chr14 |
| LINC00294 | 1 | chr11 |
| MND1      | 1 | chr4  |
| TMPRSS3   | 1 | chr21 |
| HSF1      | 1 | chr8  |
| OCEL1     | 1 | chr19 |
| ZBTB43    | 1 | chr9  |
| NMU       | 1 | chr4  |



|            |   |       |
|------------|---|-------|
| GALK2      | 1 | chr15 |
| DOT1L      | 1 | chr19 |
| BCL11B     | 1 | chr14 |
| SPTBN4     | 1 | chr19 |
| LINC00461  | 1 | chr5  |
| ZNF517     | 1 | chr8  |
| NOTCH1     | 1 | chr9  |
| BCL2       | 1 | chr18 |
| LOXHD1     | 1 | chr18 |
| RHOBTB3    | 1 | chr5  |
| B3GALTL    | 1 | chr13 |
| CYP11B1    | 1 | chr8  |
| MCF2L      | 1 | chr13 |
| ATP8A2     | 1 | chr13 |
| GPCPD1     | 1 | chr20 |
| STAU2      | 1 | chr8  |
| NEK6       | 1 | chr9  |
| KCTD17     | 1 | chr22 |
| GAS6       | 1 | chr13 |
| GRTP1      | 1 | chr13 |
| FYCO1      | 1 | chr3  |
| DSCAML1    | 1 | chr11 |
| PCGF3      | 1 | chr4  |
| DNMT3A     | 1 | chr2  |
| FAM58A     | 1 | chrX  |
| SPI1       | 1 | chr11 |
| NUDCD1     | 1 | chr8  |
| LHX9       | 1 | chr1  |
| RILPL1     | 1 | chr12 |
| GPSM1      | 1 | chr9  |
| NTSR1      | 1 | chr20 |
| MIRLET7BHG | 1 | chr22 |
| SV2B       | 1 | chr15 |
| RAB3IL1    | 1 | chr11 |
| EPHA8      | 1 | chr1  |
| NBL1       | 1 | chr1  |
| PILRA      | 1 | chr7  |
| KCNQ1      | 1 | chr11 |
| INO80      | 1 | chr15 |
| GPR107     | 1 | chr9  |
| AOX1       | 1 | chr2  |
| ZNF444     | 1 | chr19 |
| PCMT1      | 1 | chr6  |

|              |   |       |
|--------------|---|-------|
| PRR5-ARHGAP8 | 1 | chr22 |
| RAB35        | 1 | chr12 |
| RWDD4        | 1 | chr4  |
| POLDIP3      | 1 | chr22 |
| TNN          | 1 | chr1  |
| POFUT2       | 1 | chr21 |
| CLEC17A      | 1 | chr19 |
| RHBDL1       | 1 | chr16 |
| ANKMY1       | 1 | chr2  |
| LOC100130992 | 1 | chr10 |
| RALGDS       | 1 | chr9  |
| LLGL2        | 1 | chr17 |
| PARL         | 1 | chr3  |
| SHC2         | 1 | chr19 |
| TEX22        | 1 | chr14 |
| LOC401324    | 1 | chr7  |
| ABCC1        | 1 | chr16 |
| SCG5         | 1 | chr15 |
| LOC401109    | 1 | chr3  |
| SH2D5        | 1 | chr1  |
| PPP2R2B      | 1 | chr5  |
| KIF25        | 1 | chr6  |
| PKNOX1       | 1 | chr21 |
| EFR3B        | 1 | chr2  |
| SVOP         | 1 | chr12 |
| THSD7A       | 1 | chr7  |
| PCDHGA7      | 1 | chr5  |
| GNA14        | 1 | chr9  |
| ERCC8        | 1 | chr5  |
| ZNF787       | 1 | chr19 |
| TLK2         | 1 | chr17 |
| KCNH7        | 1 | chr2  |
| HOPX         | 1 | chr4  |
| KHDC1        | 1 | chr6  |
| RPS6KA2      | 1 | chr6  |
| LOC100133669 | 1 | chr8  |
| POGZ         | 1 | chr1  |
| ATP1A1       | 1 | chr1  |
| PTGES        | 1 | chr9  |
| PHGDH        | 1 | chr1  |
| METTL15      | 1 | chr11 |
| MYO18B       | 1 | chr22 |
| MIR5095      | 1 | chr20 |

|                |   |       |
|----------------|---|-------|
| THPO           | 1 | chr3  |
| NLRP5          | 1 | chr19 |
| CRYL1          | 1 | chr13 |
| KDM4C          | 1 | chr9  |
| ATRNL1         | 1 | chr10 |
| SNX27          | 1 | chr1  |
| ZNF710         | 1 | chr15 |
| DNAH10         | 1 | chr12 |
| SDCCAG8        | 1 | chr1  |
| KIAA2022       | 1 | chrX  |
| VEGFC          | 1 | chr4  |
| TBATA          | 1 | chr10 |
| CNTNAP5        | 1 | chr2  |
| ZFP82          | 1 | chr19 |
| P2RX4          | 1 | chr12 |
| LINC00421      | 1 | chr13 |
| LOC100128675   | 1 | chr19 |
| COL27A1        | 1 | chr9  |
| C15orf38-AP3S2 | 1 | chr15 |
| LDLRAD3        | 1 | chr11 |
| MPP7           | 1 | chr10 |
| PCDHGA8        | 1 | chr5  |
| VPRBP          | 1 | chr3  |
| VAC14          | 1 | chr16 |
| CCDC57         | 1 | chr17 |
| PARP9          | 1 | chr3  |
| NRG1           | 1 | chr8  |
| PCDHGB5        | 1 | chr5  |
| CPNE7          | 1 | chr16 |
| SNX29P2        | 1 | chr16 |
| TMEM8A         | 1 | chr16 |
| ABCC4          | 1 | chr13 |
| PIP5K1C        | 1 | chr19 |
| CNTN6          | 1 | chr3  |
| FAT3           | 1 | chr11 |
| FFAR1          | 1 | chr19 |
| PPARA          | 1 | chr22 |
| PLEC           | 1 | chr8  |
| PHF17          | 1 | chr4  |
| EPC1           | 1 | chr10 |
| ABCC6          | 1 | chr16 |
| NTHL1          | 1 | chr16 |
| LOC442459      | 1 | chrX  |

|                |   |       |
|----------------|---|-------|
| GTF2IRD1P1     | 1 | chr7  |
| STAG1          | 1 | chr3  |
| C1QTNF6        | 1 | chr22 |
| LOC84931       | 1 | chr2  |
| TOM1           | 1 | chr22 |
| PCDHGB4        | 1 | chr5  |
| C6orf99        | 1 | chr6  |
| TPTE2          | 1 | chr13 |
| PINK1          | 1 | chr1  |
| SHISA9         | 1 | chr16 |
| GAS7           | 1 | chr17 |
| PCDHGA5        | 1 | chr5  |
| MGAT4C         | 1 | chr12 |
| CCL26          | 1 | chr7  |
| SAP130         | 1 | chr2  |
| B3GALT6        | 1 | chr1  |
| ACYP1          | 1 | chr14 |
| TBC1D3P5       | 1 | chr17 |
| FRMD4A         | 1 | chr10 |
| PMS2           | 1 | chr7  |
| MORC2-AS1      | 1 | chr22 |
| ADNP2          | 1 | chr18 |
| MECOM          | 1 | chr3  |
| BPTF           | 1 | chr17 |
| ANHX           | 1 | chr12 |
| CERS5          | 1 | chr12 |
| TMEM184A       | 1 | chr7  |
| LOC653160      | 1 | chr1  |
| TNNI3K         | 1 | chr1  |
| MUC16          | 1 | chr19 |
| MPND           | 1 | chr19 |
| FAM20C         | 1 | chr7  |
| SGMS1          | 1 | chr10 |
| SARDH          | 1 | chr9  |
| SHANK1         | 1 | chr19 |
| SMOC1          | 1 | chr14 |
| EPN2           | 1 | chr17 |
| TDRD5          | 1 | chr1  |
| SLC12A3        | 1 | chr16 |
| RTEL1-TNFRSF6B | 1 | chr20 |
| AP3M1          | 1 | chr10 |
| VGLL4          | 1 | chr3  |
| MACF1          | 1 | chr1  |

|              |   |       |
|--------------|---|-------|
| DNM1L        | 1 | chr12 |
| KLF2         | 1 | chr19 |
| JMJD1C       | 1 | chr10 |
| LOC100506207 | 1 | chr6  |
| C1orf94      | 1 | chr1  |
| PROSER2-AS1  | 1 | chr10 |
| KPNA1        | 1 | chr3  |
| EOGT         | 1 | chr3  |
| OR5M8        | 1 | chr11 |
| BRCA1        | 1 | chr17 |
| KLF12        | 1 | chr13 |
| SLC24A4      | 1 | chr14 |
| CTBP2        | 1 | chr10 |
| CAMSAP3      | 1 | chr19 |
| ITGBL1       | 1 | chr13 |
| AJAP1        | 1 | chr1  |
| ATPBD4-AS1   | 1 | chr15 |
| LOC286094    | 1 | chr8  |
| ZNF99        | 1 | chr19 |
| NPRL3        | 1 | chr16 |
| C12orf50     | 1 | chr12 |
| RNLS         | 1 | chr10 |
| CDH15        | 1 | chr16 |
| GOLGA8A      | 1 | chr15 |
| HADHA        | 1 | chr2  |
| ERBB4        | 1 | chr2  |
| DNAH5        | 1 | chr5  |
| DLG2         | 1 | chr11 |
| AFF4         | 1 | chr5  |
| SRSF10       | 1 | chr1  |
| CRMP1        | 1 | chr4  |
| RIMS1        | 1 | chr6  |
| TMEM105      | 1 | chr17 |
| ADAT3        | 1 | chr19 |
| FRMD8        | 1 | chr11 |
| FBRSL1       | 1 | chr12 |
| PDE11A       | 1 | chr2  |
| MIR181C      | 1 | chr19 |
| URGCP-MRPS24 | 1 | chr7  |
| KLK10        | 1 | chr19 |
| C11orf65     | 1 | chr11 |
| TEKT5        | 1 | chr16 |
| GHSR         | 1 | chr3  |

|            |   |       |
|------------|---|-------|
| STK11      | 1 | chr19 |
| RIMBP2     | 1 | chr12 |
| PPP2R2C    | 1 | chr4  |
| ST3GAL2    | 1 | chr16 |
| PDE6B      | 1 | chr4  |
| ADAMTS12   | 1 | chr5  |
| FAM69B     | 1 | chr9  |
| MACROD1    | 1 | chr11 |
| IL1RL2     | 1 | chr2  |
| SUN1       | 1 | chr7  |
| CUBN       | 1 | chr10 |
| MGLL       | 1 | chr3  |
| YAE1D1     | 1 | chr7  |
| ATP11A     | 1 | chr13 |
| MYOCD      | 1 | chr17 |
| CNPY1      | 1 | chr7  |
| RAB3C      | 1 | chr5  |
| PRDX1      | 1 | chr1  |
| CCDC149    | 1 | chr4  |
| SLC51A     | 1 | chr3  |
| KSR1       | 1 | chr17 |
| PLXNC1     | 1 | chr12 |
| EYA2       | 1 | chr20 |
| PPM1E      | 1 | chr17 |
| CPNE2      | 1 | chr16 |
| NTNG1      | 1 | chr1  |
| LINC00693  | 1 | chr3  |
| PACRG      | 1 | chr6  |
| CA9        | 1 | chr9  |
| BABAM1     | 1 | chr19 |
| INPP5D     | 1 | chr2  |
| ANKRD20A9P | 1 | chr13 |
| ZNF407     | 1 | chr18 |
| RTN4RL1    | 1 | chr17 |
| CD9        | 1 | chr12 |

## site locations

80885897,80885901,80885910,80885924,80885930,80885933,80885952,80885978,808  
53832854,53832864,53833078,53833082,53833096,53833127,53833131,53833132,538  
42837883,42837904,42862627,42862811,42863011,42863013,42863172,42863173,428  
6459346,6459396,6128106,6385505,6385507,6769736,6869494,6975521,7013945,7126  
50256539,50256545,50256867,50256869,50256892,50256899,50257311,50257345,502  
6425758,6442194,6442198,6442210,6442212,6442238,6442247,6442254,6442291,6442  
151078762,151078769,151078771,151078775,151078786,151078793,151078803,15107  
84140710,84140719,84140721,84140723,84140732,84140735,84140753,84140777,841  
157792086,157818754,157799746,158027614,158109457,158186238,158217285,15824  
1475063,1475087,1475099,1475107,1475129,1475140,1475142,1475161  
179581,179588,179616,179623,179642,179644,179653,179657  
2761118,2747549,2752964,2886201,2886238,2886249,2938998  
1804894,1804901,1804910,1804916,1804921,1804959,1804993  
18699964,18699968,18699970,18699999,18700008,18700038,18700058  
162850908,162528353,162539208,162539213,162693582,163096332,163096348  
28149330,28150213,28476562,29110580,29110581,29110627  
101694275,101858142,101892327,101586764,101679473,101771662  
79494991,79495002,79495020,79495022,79495036,79495047  
63904583,63678356,63772374,63772382,63859606,63859699  
84439591,84560741,84560786,84692728,84692772,84692788  
7351443,7430418,7443240,7451442,7500739,7738401  
132202936,132202941,132202972,132203010,132222753,132222754  
47508572,47531319,47185263,47548187,47552521,47557636  
59897399,59876123,60166217,60174399,60372869,60512936  
1148048,1113915,1130889,1164072,1164139,1169021  
98812969,98827209,98832214,98862325,98862375,98862392  
55104159,55105156,55105169,55105171,55105184,55105189  
167182469,167182470,166944388,167182406,167196031,167196063  
13301060,13404332,13431992,13432069,13571929  
1643950,1438439,1577806,1590616,1774954  
27491291,27472771,27472772,27476547,27501188  
135341357,135341388,135341790,135341909,135342191  
1645478,1649416,1660042,1662027,1663210  
125448959,125455371,125455372,125457201,125437142  
51417503,51417508,51417534,51417550,51417553  
60392283,60392305,60392327,60392339,60392362  
6869494,6975521,7013945,7126103,7200186  
6224779,6224826,6228522,6212546,6269736  
60898505,60907895,60926221,60930091,60938308  
245381025,245393901,245681000,245715801,245851486  
24301320,24301369,24301373,24301380,24301394  
70528243,70682546,70425842,70425843,70437604

89038729,88951647,88953882,88953887,88968926  
14423492,14423493,14759025,15984559,15984564  
3053413,3053682,3053685,3053761,3055568  
51417503,51417508,51417534,51417550,51417553  
168458072,168458073,168474308,168479602  
1227719,1211221,1215059,1235322  
1063282,1081766,1081767,1084400  
88951647,88953882,88953887,88968926  
70519117,70837057,70837080,70880637  
130561184,130561204,130561262,130561278  
1633136,1493528,1505775,1511725  
664082,677881,677890,677899  
1464589,1464608,1430797,1469776  
133428241,133420273,133452074,133453540  
67854284,68053718,68069304,68629037  
31538956,31693693,32603677,33074770  
7344654,7344698,7344712,7344728  
5144666,5144667,5152786,5154846  
60166217,60174399,60372869,60512936  
82108898,82108926,82108938,82108942  
82108898,82108926,82108938,82108942  
77202644,77202645,77220878,77221799  
150375271,150410977,150423966,150423967  
62049177,62051163,62056325  
77881285,77881292,77881319  
2032423,2024445,2048933  
58322407,58406749,58316080  
136305437,136308542,136300712  
140418303,140439398,140439426  
8595660,8595688,8595693  
107701947,107701980,107745702  
178701724,178583157,178736617  
138136408,138277128,138285547  
124987754,124987767,124987769  
63678356,63772374,63772382  
33036695,33036697,33036701  
625876,736017,736018  
10647835,10647837,10647879  
157876915,157913475,157932677  
21134595,21134596,21361300  
5055995,5127897,5127968  
1712819,1712858,1712978  
1777815,1778321,1712430



58560322,58610256,58610257  
100260559,100260560,100497664  
923765,697379,1042396  
241528926,241537047,241531172  
8042079,8042113,8053059  
76185796,76186886,76198457  
168458072,168458073,168474308  
143338681,143373004,143382143  
128987362,128987417,129018407  
134436738,134436740,134436761  
1042227,1042295,1064333  
1464589,1464608,1469776  
204048147,204048207,204048221  
152276148,152276624,152276670  
3038842,3195532,3228695  
4190586,4211076,4211081  
5355940,5361230,5427848  
173103159,173402338,173402339  
8042079,8042113,8053059  
8042079,8042113,8053059  
136199464,136199465,136199502  
50239356,50239403,50239404  
78357293,78261500,78883255  
31538956,31693693,32603677  
1090332,1044953,1133513  
70425842,70425843,70437604  
50945768,50960192,50960252  
105993535,105993569,105993600  
2736981,2736982,2754084  
239997710,240295801,240295802  
45339200,45339208,45344326  
78564532,78564600,78564602  
29499634,29516446,29420473  
101903335,101924537,101924539  
29202024,29827515,29880980  
50311412,50311527,50661499  
49629845,49636805,49636807  
28149330,28150213,28476562  
121881846,121881847,121891696  
48648361,48689798,48689799  
370596,370639,370641  
11875084,11875085,11907859  
71387221,71524887,71478052

88793810,88793822,88793842  
119834144,119834160  
504920,536685  
89832847,89858525  
88254823,88254825  
16269140,16269141  
100667714,100788211  
61547236,61547237  
233253104,233399444  
76185796,76186886  
56732799,56733571  
191963202,192090439  
2131565,2131578  
131855535,131855536  
114737080,114737086  
24708453,24708478  
234663653,234664070  
83553637,84156725  
105170221,105171845  
94483628,94483633  
4804152,4804183  
79368458,79368495  
24638979,24485182  
136131436,136133712  
1777815,1778321  
4804152,4804183  
743982,846798  
234663653,234664070  
77674633,77683125  
2903751,2903798  
138973585,138973626  
4094774,4102448  
121164388,121206075  
80988416,80988417  
20111266,20111267  
73669043,73681089  
101349172,101350387  
61519232,61520723  
21301178,21330991  
188011801,188219351  
55054206,55054211  
372194,372986  
1665014,1666807

47848458,47853840  
151586044,151586045  
49378970,49378985  
41585571,41585576  
121191208,121213135  
27128210,27140921  
68514554,68514586  
29456667,29503557  
1206496,1206503  
8808057,8808059  
152192113,152192631  
78876226,78683458  
146050135,146335868  
150194484,150202102  
119571087,119571091  
812255,812479  
33366103,33466306  
49022886,49022902  
128611281,128611282  
140653360,140687120  
117846079,117846080  
48803931,48844793  
12412836,12412837  
23505467,23505575  
70617317,70792492  
72836951,72837000  
183713815,183713816  
11353695,11207292  
156878421,156883491  
5998328,5998366  
3439415,3464711  
68532708,68532820  
235333172,235333173  
186203288,186208714  
696500,696502  
50311412,50311527  
37935946,38042209  
6448606,6465694  
237123475,237123502  
1577806,1590616  
3101637,3101817  
3615047,3607518  
9670833,9672089

57290845,57274149  
14260075,14310797  
2522390,2522391  
27250387,27471602  
1113915,1130889  
66733266,66733338  
234663653,234664070  
67195173,67270777  
33410800,33410829  
70570289,70604275  
16624957,16863981  
119315721,119363071  
9130196,9132751  
15576599,15576600  
102247751,102247753  
151390749,151393353  
107391394,107426528  
58610256,58610257  
3644890,3648757  
234663653,234664070  
137535735,137713757  
234663653,234664070  
3526496,3533273  
75438233,75444572  
3227502,3277484  
1786179,1786266  
10798255,10823359  
90833316,90833345  
149772746,149795690  
133906248,133943785  
107241964,107241975  
138646497,138656229  
40992931,40992945  
65412778,65939826  
177761376,177976241  
89167394,89167429  
19440536,19440537  
9784206,9784219  
94003834,94157362  
24516752,24832885  
54036817,54036818  
8446823,8505453  
46872414,46879969

234663653,234664070  
44280703,44290375  
155424627,155519533  
31538956,31693693  
2292689,2172022  
25978582,26078909  
84212709,84212710  
114353912,114571228  
40459032,40583151  
133366240,133403333  
178331204,178393772  
73617438,73617458  
114821692,114821703  
21183608,21337794  
196634118,196634119  
57290845,57274149  
85811854,85811881  
202638788,202638789  
101924537,101924539  
1316894,1320118  
46350446,46350450  
15770642,15770643  
104621139,104621144  
3216288,3268254  
35564676,35558831  
50299421,50288630  
73480200,73480218  
144887733,144877833  
234663653,234664070  
33021466,33021467  
158896485,158896515  
4055515,4118375  
1641550,1583712  
60969884,60963818  
39271537,39271538  
45584540,45587004  
10207898,10280165  
4894110,4894170  
78445708,78492204  
2876748,2882107  
68165118,68169686  
60596617,60598912  
133601687,133601824

56465308,56465311  
18977943,18977945  
3255736,3255741  
234663653,234664070  
54036817,54036818  
80829706,80829707  
70526843,70585373  
70837057,70837080  
524881,531139  
91265664,91265665  
69656327,69656328  
13371574,13397636  
20641659,20641660  
111436691,111527986  
61490244,61458594  
2353556,2353557  
76862024,76862025  
97979532,97979533  
1912817,1917127  
5389713,5389714  
128812117,129169510  
35302603,35332660  
230457889,230552128  
71797711,71692546  
66479904,66479905  
68821860,68853503  
1388103,1395612  
3148019,3147079  
139091549,139091874  
44157752,44083743  
77022852,77022853  
444996,418675  
2041154,1999678  
102883962,102883987  
1430616,1430647  
60372869,60512936  
15984559,15984564  
44526397,44559478  
23739315,23742538  
1129439,1129485  
7745032,7765495  
40082538,40060205  
132558689,132558761

47074257,47036716  
75372848,75375879  
53212923,53218181  
34285345,34060801  
120433495,120433500  
70856188,70886007  
242605420,242584161  
125287393,125287394  
210220802,210220903  
10247268,10258560  
75611354,75614294  
22900493,22923992  
37159441,37159532  
736017,736018  
3828752,3828753  
195925355,195933370  
770493,794963  
81192339,81232273  
2522390,2522391  
100851242,100851243  
43101270,43090939  
98251540,98251544  
40726826,41813055  
22471822,22471823  
54500140,54500231  
1252535,1252536  
63269641,63328784  
126715435,126719832  
43457167,43460458  
50611831,50624821  
3621933  
49303068  
138416120  
2871451  
13527861  
36975759  
67600595  
3281296  
120032540  
9616060  
7907571  
120798926  
138268233

99376748  
184848069  
241653710  
232933589  
1956361  
89757132  
8088757  
1023891  
225862244  
77943467  
140783061  
130157394  
233566677  
140275798  
77906392  
49277055  
242615470  
43620580  
39496742  
140783061  
76054960  
39366036  
135000682  
25144907  
5847195  
2261683  
21361300  
56258736  
9730394  
2851688  
31779664  
121568707  
91983472  
11836948  
4512512  
1368341  
61609749  
77774949  
45117629  
495127  
43044775  
28296877  
4447482



245227092  
35563541  
51744256  
70775172  
44838660  
45041118  
3125407  
123926393  
419921  
241401565  
29485475  
39400107  
140219998  
185165  
111039356  
29931204  
135716507  
55874093  
144941419  
49682898  
228110732  
134188872  
54933103  
50898617  
105815572  
8233264  
11591802  
98259396  
9750820  
57552264  
92150275  
43584942  
66166172  
19583733  
175092242  
50105239  
88074016  
62278385  
42805236  
105540724  
49427252  
101806930  
15568514

19028551  
49517215  
93364910  
64744423  
36276085  
16286726  
73838029  
27144196  
24739250  
46344569  
64314779  
39883987  
166866088  
27138950  
69063476  
48526703  
57283974  
96349690  
15699077  
46511616  
133169726  
10023876  
161274326  
3434261  
140968750  
4399114  
15415022  
69855903  
34711337  
152807424  
120222696  
156189625  
6099086  
105167535  
62301969  
71332985  
83317537  
432779  
45281775  
63761059  
178416062  
112505108  
5075224

112049875  
180482539  
74712951  
20553573  
100684925  
60728953  
161251918  
108566049  
129534618  
139904754  
140783061  
100043086  
194929572  
90425672  
146929217  
10462341  
11566772  
70105763  
743982  
159789608  
122737256  
17983245  
19573205  
24014551  
159846583  
166147711  
36277445  
39233975  
75197183  
956455  
18706287  
159180009  
153033733  
15443575  
140783061  
168185593  
74009153  
81013035  
50588183  
2829476  
38222035  
73723166  
55593164

140783061  
222704637  
15963671  
18671899  
156293490  
644301  
41122515  
40314967  
140783061  
5864583  
101098047  
536685  
43744893  
37679533  
71820651  
37699289  
4435161  
43985515  
4462772  
64225346  
1500777  
145755582  
65683072  
5683649  
5620733  
74294757  
17721388  
201708421  
49701981  
45786783  
24801314  
22160709  
228491315  
43165015  
153648928  
178192902  
39070929  
133989881  
26708120  
44780321  
38627237  
151527035  
239929360

36917189  
92697031  
26511115  
128671100  
101106210  
45973939  
159207835  
13213728  
113806426  
140331113  
68295510  
130636454  
8541630  
119522926  
61443659  
31133655  
128183912  
45753891  
43296173  
28256783  
7251603  
15415022  
21883429  
74928845  
6062988  
42112504  
57563395  
111926896  
115594262  
42382747  
115801836  
27015760  
43548216  
99376748  
958088  
79261346  
81232273  
88920677  
53787694  
40627210  
133638543  
40765784  
89180081

111901451  
1038212  
7671606  
49930798  
20005511  
640726  
91609462  
48597192  
144461039  
152077845  
4887677  
53922182  
977419  
101966996  
7774520  
1534387  
30227580  
79482708  
120150195  
14260075  
133800093  
45837  
2041154  
30955537  
119206373  
90771703  
47086345  
30510532  
49183703  
111321250  
179743875  
681359  
143208214  
110685597  
2310576  
55361588  
179145862  
25446359  
75639854  
77942630  
19693869  
65155426  
115810642

4984168  
39854307  
88074459  
82045876  
27421654  
31826545  
118616294  
44130262  
65220461  
82732688  
804612  
47862091  
236613477  
16502284  
183906828  
44023473  
47975939  
130638028  
32180470  
114566203  
80653992  
155410953  
22824829  
1493169  
111342297  
37489862  
235600208  
4316167  
5744912  
78261500  
64888532  
33626235  
40518778  
1249185  
148807225  
52985695  
114310921  
68932568  
143608582  
117698417  
56015672  
40122485  
626834

25064191  
6681743  
116455059  
98114709  
105170221  
19004173  
89793113  
32116963  
62199258  
5101814  
62417145  
139735105  
122626380  
1583712  
132976407  
22137039  
195535322  
230848701  
42990521  
124826676  
45406290  
240670793  
123681139  
54644961  
16746656  
127258342  
44597748  
15467777  
170060146  
4435161  
26409949  
53885310  
70848734  
25820890  
228472980  
140653360  
111901451  
194077617  
134111481  
37061821  
104187439  
26405317  
4857396



239048965  
55096491  
92577340  
129718127  
103417023  
104215798  
47545908  
1708771  
29780291  
34893338  
29917785  
26085405  
176011887  
50218304  
20265220  
26565559  
76452150  
15501131  
58060536  
3767265  
91044069  
150946772  
50037886  
19617234  
24341072  
32297484  
29839695  
14099081  
12631891  
134230643  
143832768  
60837033  
66282150  
151087988  
66630076  
29676041  
24324808  
2717620  
33583715  
131245620  
49307524  
187215448  
72801122

126683071  
140466814  
3116362  
4507864  
139652189  
122687143  
1399055  
35369244  
5338900  
10338746  
77689499  
161954548  
18236885  
23780424  
146068321  
77714227  
7594158  
71797711  
50781389  
3306523  
87871580  
48844793  
144449706  
27702774  
39835886  
3615047  
70157051  
3018925  
21727748  
79824323  
48950880  
139101706  
13966158  
54198305  
1151618  
1898937  
41597379  
73406357  
72582163  
11737881  
7350380  
26915714  
26608782

234897813  
3234979  
69089846  
24851054  
222873966  
48803931  
77662247  
136340458  
196659961  
23532031  
28367369  
29310431  
79065497  
5802998  
33652116  
104089420  
29190137  
12777971  
90964322  
18054691  
77241391  
101483211  
2689418  
161231961  
36680376  
62624261  
9449977  
122249609  
101608210  
4622638  
161500455  
22290785  
18606376  
48650558  
134168808  
5620733  
4419898  
70519117  
90001881  
215867783  
36353936  
154534618  
22168216

118844761  
56372979  
1196184  
52995043  
15673189  
57329407  
68720845  
185037323  
39933047  
213048256  
153191644  
2418071  
22479988  
31841757  
49440896  
59938978  
156189625  
9126976  
45068112  
31429353  
58014796  
11988839  
140783061  
49893543  
145252482  
55494626  
658048  
28063228  
129280064  
44282027  
144494169  
19975658  
53587010  
12008018  
51832469  
85462261  
18565704  
43923161  
119533732  
108044895  
130754655  
132862924  
99137831

240503601  
35509160  
23891602  
166019081  
2494019  
233770144  
16505604  
7011453  
5047192  
158879966  
127348915  
14088948  
242723648  
74743717  
19383370  
134727535  
59803822  
45170741  
32632850  
80728061  
114665653  
37463048  
20894616  
241448405  
57552264  
156367299  
11880998  
37552988  
50611831  
159519410  
1576635  
57831641  
2904202  
122003248  
107243558  
33354403  
120012170  
25755669  
13679214  
103856381  
138011059  
101393295  
99662866

186697926  
3523747  
133593354  
41893322  
25638407  
12249019  
22896102  
2160494  
1391234  
112785237  
73319512  
104194278  
174410846  
19596138  
131504580  
151731479  
89719633  
8875318  
36894037  
51047189  
55521935  
43318993  
66282150  
6418642  
140783061  
132329206  
114505405  
134741103  
101397085  
21183608  
6063350  
81530659  
234663653  
42589916  
26872409  
76859102  
187581092  
1081598  
78534660  
44152788  
4684446  
111565937  
17656793

79081359  
2942171  
2214430  
99656046  
57925285  
36869013  
2605539  
63885704  
68932568  
42326258  
79268260  
3624798  
31660000  
95465911  
48131308  
134943031  
88619806  
463919  
70054057  
95737647  
95845082  
179711536  
39774944  
121088884  
22647616  
1421739  
70848734  
678430  
75279846  
115483612  
67347339  
59368387  
142561729  
143795382  
26659793  
66503874  
878078  
45858245  
85977395  
43010738  
4453814  
140783061  
6903492

57249091  
10554358  
77749093  
53537264  
55495378  
112996962  
101654460  
55869568  
135263305  
13695712  
75293376  
285583  
6102888  
15258423  
3423441  
72350966  
112421720  
17686898  
183260073  
60837033  
112525024  
509895  
99003603  
139132985  
31533965  
32831129  
86457243  
45421742  
173983358  
19916706  
72084146  
26738909  
225394812  
19004173  
4916935  
100019739  
33097876  
154302293  
43810558  
145525404  
17339225  
129579823  
56469894



49458652  
2187851  
99641135  
41050290  
87974503  
146030084  
139401502  
60816889  
44083743  
95088562  
31828406  
143957576  
113649120  
26087639  
5587837  
74379582  
127041643  
37457413  
114555024  
113986039  
46008086  
117316047  
714017  
25551130  
152859642  
47399600  
110343617  
197887473  
124011285  
139251480  
61340967  
46484596  
91762260  
61670036  
22900493  
19975658  
99979645  
2798848  
41400561  
132884828  
201475722  
56656775  
150108749

45117629  
120538685  
184564197  
42990074  
175075825  
46700057  
14712665  
727837  
241496830  
22542000  
135973678  
73569776  
183576819  
436690  
105868861  
35402989  
16161030  
32980924  
195877923  
21057740  
146273193  
168419501  
44421872  
25347469  
109325482  
11803928  
140783061  
80044329  
60192106  
56621183  
60691223  
163398933  
57521544  
74009153  
166944388  
144081249  
151389685  
116918686  
132514863  
120270180  
28301339  
26424722  
55965167

184092736  
56511221  
21082931  
7147974  
116999307  
151615685  
90616131  
124399154  
243649329  
74044684  
177686896  
72542960  
124936983  
36893856  
121661688  
19919386  
35570306  
116981484  
90425672  
36133381  
28550653  
140783061  
51531473  
70736751  
80164654  
122248709  
32435801  
140783061  
89656043  
29344689  
427782  
95741647  
3694380  
1429396  
92622010  
35843322  
46552814  
144993068  
129743452  
32661824  
16268470  
2091600  
99058795

66289040  
136119354  
37578578  
121222494  
35698489  
140783061  
159324406  
20135545  
20961949  
13166327  
9820694  
140783061  
87119397  
75412653  
128733481  
1168540  
75528578  
25756888  
14372134  
6037990  
31318743  
77879657  
168827499  
65867128  
133808129  
50552960  
1587041  
35442519  
74712951  
8981896  
4351596  
214822  
52077715  
136545055  
51199517  
70397475  
19239431  
179564700  
56926792  
62301969  
75893633  
11611766  
39683297

32837976  
16437762  
65063262  
8449258  
34642490  
11907859  
122181796  
69061830  
56258736  
41273377  
74509345  
92825859  
126715435  
7663229  
102277204  
4758326  
35970527  
136271554  
22943371  
178051  
88400023  
90140400  
89244650  
34702884  
26440941  
212842332  
13810619  
83553637  
132281526  
24297099  
5841576  
72645775  
79288010  
1912817  
65157855  
133072766  
178906215  
13985586  
43923161  
51517528  
108298305  
10778992  
172166029

1219701  
130935425  
6550037  
70444447  
620041  
33724902  
139609202  
63885704  
102804691  
893295  
17098383  
127411436  
39609804  
113398928  
12653396  
155323907  
58040961  
45977859  
24927586  
195948834  
25803230  
94620569  
45543675  
56895272  
57149978  
108011588  
28668377  
163237541  
35674138  
17388922  
233938242  
19412346  
72776119  
1871883  
6331427









































































6143,80886147,80886227

| <b>Gene name</b> | <b>number of high covari</b> | <b>chromosome</b> |
|------------------|------------------------------|-------------------|
| FGF13            | 18                           | chrX              |
| CACNA1H          | 17                           | chr16             |
| PTPRN2           | 16                           | chr7              |
| JAG2             | 13                           | chr14             |
| EXD3             | 13                           | chr9              |
| CDH4             | 11                           | chr20             |
| PRDM16           | 11                           | chr1              |
| CYP2E1           | 10                           | chr10             |
| MAD1L1           | 9                            | chr7              |
| COL23A1          | 8                            | chr5              |
| LARGE            | 8                            | chr22             |
| FAM189A1         | 8                            | chr15             |
| FAM19A5          | 8                            | chr22             |
| PRKAR1B          | 8                            | chr7              |
| MGMT             | 8                            | chr10             |
| LRP1B            | 7                            | chr2              |
| ONECUT2          | 7                            | chr18             |
| CBFA2T3          | 7                            | chr16             |
| TSNARE1          | 7                            | chr8              |
| ADARB2           | 7                            | chr10             |
| SEC14L5          | 7                            | chr16             |
| RBFOX1           | 7                            | chr16             |
| CSMD1            | 7                            | chr8              |
| CAMTA1           | 7                            | chr1              |
| PRKAR1B          | 7                            | chr7              |
| CUX1             | 7                            | chr7              |
| ACAP3            | 6                            | chr1              |
| SORCS2           | 6                            | chr4              |
| MACROD2          | 6                            | chr20             |
| FLG              | 6                            | chr1              |
| DPP6             | 6                            | chr7              |
| CDH4             | 6                            | chr20             |
| CTBP1            | 6                            | chr4              |
| DAGLA            | 5                            | chr11             |
| TMEM184A         | 5                            | chr7              |
| DLEU7-AS1        | 5                            | chr13             |
| INTS1            | 5                            | chr7              |
| DLEU7            | 5                            | chr13             |
| WDR72            | 5                            | chr15             |
| RPTOR            | 5                            | chr17             |
| ZNF516           | 5                            | chr18             |
| SLC36A1          | 5                            | chr5              |



|                |   |       |
|----------------|---|-------|
| CEP112         | 5 | chr17 |
| MYO1F          | 5 | chr19 |
| SDK1           | 5 | chr7  |
| SMOC2          | 5 | chr6  |
| CNTNAP2        | 5 | chr7  |
| KIF26B         | 5 | chr1  |
| PARK2          | 5 | chr6  |
| RABL6          | 5 | chr9  |
| RPS6KA2        | 5 | chr6  |
| COLEC11        | 5 | chr2  |
| DPP6           | 5 | chr7  |
| LRRC4C         | 5 | chr11 |
| NPR3           | 5 | chr5  |
| DLGAP2         | 5 | chr8  |
| SORCS1         | 5 | chr10 |
| RTN4RL1        | 5 | chr17 |
| MORN1          | 5 | chr1  |
| MEGF6          | 5 | chr1  |
| MMP17          | 5 | chr12 |
| TBCD           | 5 | chr17 |
| DSCAML1        | 5 | chr11 |
| STK17B         | 4 | chr2  |
| KAZN           | 4 | chr1  |
| TTC40          | 4 | chr10 |
| SBNO2          | 4 | chr19 |
| ERICH1-AS1     | 4 | chr8  |
| LINGO2         | 4 | chr9  |
| PRKCZ          | 4 | chr1  |
| PCDH19         | 4 | chrX  |
| RGS12          | 4 | chr4  |
| TMEM240        | 4 | chr1  |
| FIBCD1         | 4 | chr9  |
| CLSTN2         | 4 | chr3  |
| SHANK2         | 4 | chr11 |
| SYT1           | 4 | chr12 |
| C22orf34       | 4 | chr22 |
| DOCK1          | 4 | chr10 |
| ZNF664-FAM101A | 4 | chr12 |
| KCTD16         | 4 | chr5  |
| EPHA1-AS1      | 4 | chr7  |
| N4BP3          | 4 | chr5  |
| RBFOX3         | 4 | chr17 |
| C16orf62       | 4 | chr16 |

|          |   |       |
|----------|---|-------|
| GPR132   | 4 | chr14 |
| ADAMTS2  | 4 | chr5  |
| PNKD     | 4 | chr2  |
| KIF17    | 4 | chr1  |
| CDH12    | 4 | chr5  |
| IL1RAPL1 | 4 | chrX  |
| LPHN1    | 4 | chr19 |
| RYR3     | 4 | chr15 |
| HDAC4    | 4 | chr2  |
| DNAH8    | 4 | chr6  |
| GPC5     | 4 | chr13 |
| NCAM2    | 4 | chr21 |
| ANO2     | 4 | chr12 |
| ABR      | 4 | chr17 |
| GAS6     | 4 | chr13 |
| ATP11A   | 3 | chr13 |
| TPST2    | 3 | chr22 |
| PIK3C2B  | 3 | chr1  |
| ZNF282   | 3 | chr7  |
| SLC25A25 | 3 | chr9  |
| GABBR2   | 3 | chr9  |
| MYRF     | 3 | chr11 |
| DAB1     | 3 | chr1  |
| SGCZ     | 3 | chr8  |
| CACNA1A  | 3 | chr19 |
| CCDC144B | 3 | chr17 |
| D2HGDH   | 3 | chr2  |
| FAM83A   | 3 | chr8  |
| LDLRAD4  | 3 | chr18 |
| ADAMTS2  | 3 | chr5  |
| ALK      | 3 | chr2  |
| LRRTM4   | 3 | chr2  |
| CNTNAP5  | 3 | chr2  |
| NXN      | 3 | chr17 |
| TLN2     | 3 | chr15 |
| NBEA     | 3 | chr13 |
| NFATC1   | 3 | chr18 |
| SIPA1L3  | 3 | chr19 |
| PEAR1    | 3 | chr1  |
| SLC2A6   | 3 | chr9  |
| EIF4G3   | 3 | chr1  |
| LAMC3    | 3 | chr9  |
| CLYBL    | 3 | chr13 |

|               |   |       |
|---------------|---|-------|
| MACROD2       | 3 | chr20 |
| LOC441666     | 3 | chr10 |
| C9orf171      | 3 | chr9  |
| ULK4          | 3 | chr3  |
| RORA          | 3 | chr15 |
| DNAJC25-GNG10 | 3 | chr9  |
| GPHN          | 3 | chr14 |
| RPH3AL        | 3 | chr17 |
| ZSCAN1        | 3 | chr19 |
| BCYRN1        | 3 | chrX  |
| PRRT1         | 3 | chr6  |
| GAS7          | 3 | chr17 |
| MICAL3        | 3 | chr22 |
| RYR2          | 3 | chr1  |
| RIMBP2        | 3 | chr12 |
| TRAPPC9       | 3 | chr8  |
| KIF1A         | 3 | chr2  |
| TPCN2         | 3 | chr11 |
| PRR5-ARHGAP8  | 3 | chr22 |
| KIAA1755      | 3 | chr20 |
| BEND2         | 3 | chrX  |
| NRXN1         | 3 | chr2  |
| MIR548F5      | 3 | chr13 |
| CHST15        | 3 | chr10 |
| RAB36         | 3 | chr22 |
| PLEKHG1       | 3 | chr6  |
| MLLT1         | 3 | chr19 |
| CWF19L2       | 3 | chr11 |
| HEPHL1        | 3 | chr11 |
| FBLN1         | 3 | chr22 |
| QSOX2         | 3 | chr9  |
| CHST8         | 3 | chr19 |
| PCSK6         | 3 | chr15 |
| VAV2          | 3 | chr9  |
| IGSF23        | 3 | chr19 |
| MECOM         | 3 | chr3  |
| CDH13         | 3 | chr16 |
| NAALADL2      | 3 | chr3  |
| PKNOX2        | 3 | chr11 |
| ANKRD30BL     | 3 | chr2  |
| TMBIM1        | 3 | chr2  |
| GPR133        | 3 | chr12 |
| GALNTL6       | 3 | chr4  |

|               |   |       |
|---------------|---|-------|
| DNAH17        | 3 | chr17 |
| CAMK1D        | 3 | chr10 |
| HSH2D         | 2 | chr19 |
| PIEZO2        | 2 | chr18 |
| ALPL          | 2 | chr1  |
| CCDC178       | 2 | chr18 |
| C20orf85      | 2 | chr20 |
| B4GALT1       | 2 | chr9  |
| CNBD2         | 2 | chr20 |
| CACNA1B       | 2 | chr9  |
| LINC00523     | 2 | chr14 |
| PTCHD2        | 2 | chr1  |
| AP3D1         | 2 | chr19 |
| STON1-GTF2A1L | 2 | chr2  |
| ANKRD24       | 2 | chr19 |
| CACNA1G       | 2 | chr17 |
| EYS           | 2 | chr6  |
| AGAP1         | 2 | chr2  |
| GNB1L         | 2 | chr22 |
| PTPRT         | 2 | chr20 |
| MICAL3        | 2 | chr22 |
| DNAJC5        | 2 | chr20 |
| SFMBT1        | 2 | chr3  |
| SLC17A3       | 2 | chr6  |
| CCDC113       | 2 | chr16 |
| KRT72         | 2 | chr12 |
| CTSD          | 2 | chr11 |
| ENTPD6        | 2 | chr20 |
| PDE6B         | 2 | chr4  |
| PQLC1         | 2 | chr18 |
| GNG7          | 2 | chr19 |
| PCNXL2        | 2 | chr1  |
| LINC00617     | 2 | chr14 |
| C16orf45      | 2 | chr16 |
| HCN2          | 2 | chr19 |
| MAP2K2        | 2 | chr19 |
| SOGA3         | 2 | chr6  |
| CNTN4         | 2 | chr3  |
| MIR548AI      | 2 | chr14 |
| KIF19         | 2 | chr17 |
| DNAJB13       | 2 | chr11 |
| MICALL2       | 2 | chr7  |
| LOC100133669  | 2 | chr8  |

|           |   |       |
|-----------|---|-------|
| GPR123    | 2 | chr10 |
| UGT1A4    | 2 | chr2  |
| PRKAG2    | 2 | chr7  |
| ASAP1     | 2 | chr8  |
| PLEKHH1   | 2 | chr14 |
| UGT1A3    | 2 | chr2  |
| AP2A2     | 2 | chr11 |
| BAI1      | 2 | chr8  |
| ZIC3      | 2 | chrX  |
| KIAA1671  | 2 | chr22 |
| BTBD16    | 2 | chr10 |
| RERE      | 2 | chr1  |
| PCSK6     | 2 | chr15 |
| KIAA0825  | 2 | chr5  |
| 9-Sep     | 2 | chr17 |
| ANP32E    | 2 | chr1  |
| SPTB      | 2 | chr14 |
| GRM3      | 2 | chr7  |
| TNC       | 2 | chr9  |
| EPB41L4B  | 2 | chr9  |
| GRK5      | 2 | chr10 |
| UGT1A10   | 2 | chr2  |
| FLJ34503  | 2 | chr6  |
| BIN1      | 2 | chr2  |
| UGT1A6    | 2 | chr2  |
| RAB40C    | 2 | chr16 |
| ABCC5     | 2 | chr3  |
| LRRC20    | 2 | chr10 |
| DENND1A   | 2 | chr9  |
| RAP1GAP2  | 2 | chr17 |
| FGD5      | 2 | chr3  |
| TOP1MT    | 2 | chr8  |
| USP35     | 2 | chr11 |
| EYA4      | 2 | chr6  |
| CLEC17A   | 2 | chr19 |
| HDAC9     | 2 | chr7  |
| PALLD     | 2 | chr4  |
| KIAA1217  | 2 | chr10 |
| LOC285577 | 2 | chr5  |
| EFR3B     | 2 | chr2  |
| WDR18     | 2 | chr19 |
| RBM25     | 2 | chr14 |
| RGS7      | 2 | chr1  |

|            |   |       |
|------------|---|-------|
| DOK6       | 2 | chr18 |
| DLGAP3     | 2 | chr1  |
| P4HA3      | 2 | chr11 |
| AHRR       | 2 | chr5  |
| COL6A2     | 2 | chr21 |
| LMF1       | 2 | chr16 |
| KIF26A     | 2 | chr14 |
| CDH18      | 2 | chr5  |
| RASA3      | 2 | chr13 |
| CLPTM1     | 2 | chr19 |
| CELF5      | 2 | chr19 |
| CDK14      | 2 | chr7  |
| HNF4A      | 2 | chr20 |
| UGT1A9     | 2 | chr2  |
| CRELD2     | 2 | chr22 |
| LIN54      | 2 | chr4  |
| BRD1       | 2 | chr22 |
| DTNBP1     | 2 | chr6  |
| PLXNA4     | 2 | chr7  |
| GLT1D1     | 2 | chr12 |
| LINC00162  | 2 | chr21 |
| CNOT1      | 2 | chr16 |
| AFMID      | 2 | chr17 |
| ARHGAP25   | 2 | chr2  |
| NOTO       | 2 | chr2  |
| HAUS7      | 2 | chrX  |
| UVSSA      | 2 | chr4  |
| ARHGAP19   | 2 | chr10 |
| TSC2       | 2 | chr16 |
| CAMK2B     | 2 | chr7  |
| RPS6KA2    | 2 | chr6  |
| ANKRD20A9P | 2 | chr13 |
| MDGA2      | 2 | chr14 |
| BRSK2      | 2 | chr11 |
| SEC14L1    | 2 | chr17 |
| ADCK3      | 2 | chr1  |
| CYP26B1    | 2 | chr2  |
| FAM101A    | 2 | chr12 |
| YIF1B      | 2 | chr19 |
| CTNNA2     | 2 | chr2  |
| RXRA       | 2 | chr9  |
| SPN        | 2 | chr16 |
| TLL2       | 2 | chr10 |

|              |   |       |
|--------------|---|-------|
| LYRM4        | 2 | chr6  |
| LRRC4C       | 2 | chr11 |
| LOC100288637 | 2 | chr15 |
| TLE2         | 2 | chr19 |
| FGFR3        | 2 | chr4  |
| LAMA5        | 2 | chr20 |
| WDR19        | 2 | chr4  |
| STK25        | 2 | chr2  |
| INPP5A       | 2 | chr10 |
| COLEC11      | 2 | chr2  |
| DOT1L        | 2 | chr19 |
| ANKRD13C     | 2 | chr1  |
| GAK          | 2 | chr4  |
| COL25A1      | 2 | chr4  |
| THOP1        | 2 | chr19 |
| PXDNL        | 2 | chr8  |
| OTOA         | 2 | chr16 |
| COL22A1      | 2 | chr8  |
| TCERG1L      | 2 | chr10 |
| SEMA7A       | 2 | chr15 |
| RGMA         | 2 | chr15 |
| BUB1B        | 2 | chr15 |
| ZBTB46       | 2 | chr20 |
| TMEM45B      | 2 | chr11 |
| PRKAG3       | 2 | chr2  |
| WDR4         | 2 | chr21 |
| FAM20C       | 2 | chr7  |
| SNX8         | 2 | chr7  |
| LYPD6B       | 2 | chr2  |
| MECOM        | 2 | chr3  |
| KIAA2022     | 2 | chrX  |
| ZRANB3       | 2 | chr2  |
| NCS1         | 2 | chr9  |
| FAM101B      | 2 | chr17 |
| EHMT1        | 2 | chr9  |
| PLAUR        | 2 | chr19 |
| DIP2C        | 2 | chr10 |
| SLC37A1      | 2 | chr21 |
| MMEL1        | 2 | chr1  |
| DLG2         | 2 | chr11 |
| EPS15L1      | 2 | chr19 |
| PDSS1        | 2 | chr10 |
| ABLIM2       | 2 | chr4  |

|              |   |       |
|--------------|---|-------|
| ITIH3        | 2 | chr3  |
| LUZP2        | 2 | chr11 |
| NBL1         | 2 | chr1  |
| VWA3A        | 2 | chr16 |
| MCTP1        | 2 | chr5  |
| KCNG2        | 2 | chr18 |
| CXCL13       | 2 | chr4  |
| C1orf94      | 2 | chr1  |
| SYT2         | 2 | chr1  |
| TECPR2       | 2 | chr14 |
| PTPRS        | 2 | chr19 |
| PCDH9        | 2 | chr13 |
| ABCA2        | 2 | chr9  |
| HK1          | 2 | chr10 |
| APCDD1L-AS1  | 2 | chr20 |
| C1orf65      | 2 | chr1  |
| RPF2         | 2 | chr6  |
| HAGHL        | 2 | chr16 |
| LOC100286922 | 2 | chr2  |
| LOC100507373 | 2 | chr19 |
| WBSCR17      | 2 | chr7  |
| CALN1        | 2 | chr7  |
| DNAH7        | 2 | chr2  |
| KCTD17       | 2 | chr22 |
| MUC2         | 2 | chr11 |
| KCNK17       | 2 | chr6  |
| MCF2L        | 2 | chr13 |
| ANO1         | 2 | chr11 |
| DPP10        | 2 | chr2  |
| NINL         | 2 | chr20 |
| RAB40B       | 2 | chr17 |
| HTR2C        | 2 | chrX  |
| SHC2         | 2 | chr19 |
| SNED1        | 2 | chr2  |
| ATP9B        | 2 | chr18 |
| UGT1A5       | 2 | chr2  |
| MSANTD1      | 2 | chr4  |
| ADAMTS17     | 2 | chr15 |
| CHRNA4       | 2 | chr20 |
| MYO7B        | 2 | chr2  |
| FAM213B      | 2 | chr1  |
| SFSWAP       | 2 | chr12 |
| PIGZ         | 2 | chr3  |



|              |   |       |
|--------------|---|-------|
| PCSK5        | 2 | chr9  |
| BNC2         | 2 | chr9  |
| UGT1A8       | 2 | chr2  |
| DNMT3B       | 2 | chr20 |
| FAM32A       | 2 | chr19 |
| VGLL4        | 2 | chr3  |
| TNRC6B       | 2 | chr22 |
| KIAA2026     | 2 | chr9  |
| SYNPR        | 2 | chr3  |
| MIR548AO     | 2 | chr5  |
| RECQL5       | 2 | chr17 |
| DHX37        | 2 | chr12 |
| LOC339166    | 2 | chr17 |
| DSCAM        | 2 | chr21 |
| MIPEP        | 2 | chr13 |
| USP37        | 2 | chr2  |
| SH2B2        | 2 | chr7  |
| KCNN3        | 2 | chr1  |
| KCND3        | 2 | chr1  |
| DYSF         | 2 | chr2  |
| OCA2         | 2 | chr15 |
| R3HDM4       | 2 | chr19 |
| PRR5         | 2 | chr22 |
| ARHGAP23     | 2 | chr17 |
| NDRG4        | 2 | chr16 |
| SHISA6       | 2 | chr17 |
| LOC100132273 | 2 | chr22 |
| SYNPO2       | 2 | chr4  |
| CCDC102B     | 2 | chr18 |
| HSPA7        | 2 | chr1  |
| LOC284294    | 2 | chr18 |
| AP1M1        | 2 | chr19 |
| MKLN1        | 2 | chr7  |
| B3GALT6      | 2 | chr1  |
| COTL1        | 2 | chr16 |
| PKP4         | 2 | chr2  |
| RNF165       | 2 | chr18 |
| HSPG2        | 2 | chr1  |
| LINC00200    | 2 | chr10 |
| IGF1R        | 2 | chr15 |
| GRID2        | 2 | chr4  |
| ATP8A2       | 2 | chr13 |
| INPP5J       | 2 | chr22 |

|                |   |       |
|----------------|---|-------|
| TSPAN9         | 2 | chr12 |
| FBXL20         | 2 | chr17 |
| RIMS1          | 2 | chr6  |
| NUGGC          | 2 | chr8  |
| ARHGEF10       | 2 | chr8  |
| STK3           | 2 | chr8  |
| SYNGR3         | 2 | chr16 |
| GUSBP11        | 2 | chr22 |
| ARHGAP19-SLIT1 | 2 | chr10 |
| MRPL45P2       | 2 | chr17 |
| GPR98          | 2 | chr5  |
| DIS3L2         | 2 | chr2  |
| MOB2           | 2 | chr11 |
| PIEZO1         | 2 | chr16 |
| DOC2B          | 2 | chr17 |
| C1orf151-NBL1  | 2 | chr1  |
| TMCO3          | 2 | chr13 |
| IFFO2          | 2 | chr1  |
| TRPM7          | 2 | chr15 |
| COL18A1        | 2 | chr21 |
| RGS6           | 2 | chr14 |
| ZNF423         | 2 | chr16 |
| CAMKMT         | 2 | chr2  |
| LINC00616      | 2 | chr4  |
| FRMD1          | 2 | chr6  |
| GLTSCR1        | 2 | chr19 |
| USP48          | 2 | chr1  |
| FLJ12825       | 2 | chr12 |
| KDM4B          | 2 | chr19 |
| COL26A1        | 2 | chr7  |
| YWHAE          | 2 | chr17 |
| HSD17B6        | 2 | chr12 |
| SLC39A11       | 2 | chr17 |
| GRK4           | 2 | chr4  |
| UGT1A7         | 2 | chr2  |
| PAH            | 1 | chr12 |
| FAM187B        | 1 | chr19 |
| ZC3HAV1        | 1 | chr7  |
| ZCCHC24        | 1 | chr10 |
| LCN1           | 1 | chr9  |
| PRSS21         | 1 | chr16 |
| CDH8           | 1 | chr16 |
| PIGB           | 1 | chr15 |

|              |   |       |
|--------------|---|-------|
| ABCB10       | 1 | chr1  |
| KIAA1609     | 1 | chr16 |
| SFTA3        | 1 | chr14 |
| KCNAB2       | 1 | chr1  |
| ELOVL2       | 1 | chr6  |
| GTPBP3       | 1 | chr19 |
| FAM83E       | 1 | chr19 |
| TBC1D24      | 1 | chr16 |
| FBLN2        | 1 | chr3  |
| CBS          | 1 | chr21 |
| DIS3L2       | 1 | chr2  |
| GLYR1        | 1 | chr16 |
| CMTM5        | 1 | chr14 |
| MEI1         | 1 | chr22 |
| MYO9B        | 1 | chr19 |
| TUB          | 1 | chr11 |
| MROH5        | 1 | chr8  |
| LOC100128164 | 1 | chr3  |
| TEAD2        | 1 | chr19 |
| LOC100652739 | 1 | chr6  |
| GIGYF2       | 1 | chr2  |
| KIAA0825     | 1 | chr5  |
| ZNRF4        | 1 | chr19 |
| TSHZ1        | 1 | chr18 |
| PHTF1        | 1 | chr1  |
| LOC100128946 | 1 | chr22 |
| HTRA3        | 1 | chr4  |
| C8orf74      | 1 | chr8  |
| LOC442459    | 1 | chrX  |
| LCMT1        | 1 | chr16 |
| LOC100506585 | 1 | chr7  |
| CES4A        | 1 | chr16 |
| PRKG1        | 1 | chr10 |
| NTN1         | 1 | chr17 |
| SPAG16       | 1 | chr2  |
| CAPN10       | 1 | chr2  |
| FRMPD4       | 1 | chrX  |
| IQCE         | 1 | chr7  |
| PLCG2        | 1 | chr16 |
| RPN1         | 1 | chr3  |
| 11-Mar       | 1 | chr5  |
| TDRD5        | 1 | chr1  |
| PCDH7        | 1 | chr4  |

|              |   |       |
|--------------|---|-------|
| SORBS2       | 1 | chr4  |
| WDR5         | 1 | chr9  |
| RNU6-83      | 1 | chr11 |
| UAP1L1       | 1 | chr9  |
| TSHZ2        | 1 | chr20 |
| MAPK8IP2     | 1 | chr22 |
| MAGI1        | 1 | chr3  |
| POMT2        | 1 | chr14 |
| ZMYM5        | 1 | chr13 |
| ALX4         | 1 | chr11 |
| CMC1         | 1 | chr3  |
| ZFP42        | 1 | chr4  |
| C3orf67      | 1 | chr3  |
| FARP1        | 1 | chr13 |
| TSPEAR       | 1 | chr21 |
| LINC00340    | 1 | chr6  |
| URI1         | 1 | chr19 |
| JRK          | 1 | chr8  |
| AK1          | 1 | chr9  |
| TPO          | 1 | chr2  |
| CORO7-PAM16  | 1 | chr16 |
| HIP1         | 1 | chr7  |
| DNMT1        | 1 | chr19 |
| KCTD5        | 1 | chr16 |
| BAZ1A        | 1 | chr14 |
| ZNF621       | 1 | chr3  |
| LOC284395    | 1 | chr19 |
| ARL2-SNX15   | 1 | chr11 |
| SLC6A18      | 1 | chr5  |
| UBE2F        | 1 | chr2  |
| HCN1         | 1 | chr5  |
| PGS1         | 1 | chr17 |
| TAF2         | 1 | chr8  |
| RYR1         | 1 | chr19 |
| FAM92B       | 1 | chr16 |
| USP3         | 1 | chr15 |
| NANOS2       | 1 | chr19 |
| DYSF         | 1 | chr2  |
| NDC80        | 1 | chr18 |
| MAGI2        | 1 | chr7  |
| LOC100507424 | 1 | chr12 |
| ACTL6B       | 1 | chr7  |
| METTL8       | 1 | chr2  |

|              |   |       |
|--------------|---|-------|
| COL17A1      | 1 | chr10 |
| RBMS2        | 1 | chr12 |
| INPP4B       | 1 | chr4  |
| ADAMTSL1     | 1 | chr9  |
| SLC45A1      | 1 | chr1  |
| DDX12P       | 1 | chr12 |
| PPM1F        | 1 | chr22 |
| CSMD3        | 1 | chr8  |
| CTNND1       | 1 | chr11 |
| PRCD         | 1 | chr17 |
| CNOT2        | 1 | chr12 |
| COL8A1       | 1 | chr3  |
| PDZD4        | 1 | chrX  |
| MYH9         | 1 | chr22 |
| FAM160A2     | 1 | chr11 |
| LOC100652770 | 1 | chr18 |
| ZNF467       | 1 | chr7  |
| ZNF695       | 1 | chr1  |
| SFRP1        | 1 | chr8  |
| GLTSCR1L     | 1 | chr6  |
| CUL1         | 1 | chr7  |
| FGD4         | 1 | chr12 |
| FAM71E1      | 1 | chr19 |
| LOC286059    | 1 | chr8  |
| WDR37        | 1 | chr10 |
| CPLX2        | 1 | chr5  |
| ST18         | 1 | chr8  |
| ZNF280C      | 1 | chrX  |
| AGMO         | 1 | chr7  |
| PPFIA1       | 1 | chr11 |
| DAG1         | 1 | chr3  |
| IQCG         | 1 | chr3  |
| XKR4         | 1 | chr8  |
| ARHGAP8      | 1 | chr22 |
| LINC00674    | 1 | chr17 |
| CHEK2        | 1 | chr22 |
| LOXL3        | 1 | chr2  |
| GATA2        | 1 | chr3  |
| C10orf53     | 1 | chr10 |
| LPAR5        | 1 | chr12 |
| EIF2B3       | 1 | chr1  |
| SYTL3        | 1 | chr6  |
| SULF2        | 1 | chr20 |

|           |   |       |
|-----------|---|-------|
| ZZEF1     | 1 | chr17 |
| AKAP13    | 1 | chr15 |
| ZNF284    | 1 | chr19 |
| MACROD1   | 1 | chr11 |
| HIC1      | 1 | chr17 |
| MYO5B     | 1 | chr18 |
| NEK1      | 1 | chr4  |
| LOC729852 | 1 | chr7  |
| PHF21A    | 1 | chr11 |
| OTX2-AS1  | 1 | chr14 |
| APOL4     | 1 | chr22 |
| CRISPLD2  | 1 | chr16 |
| NFATC1    | 1 | chr18 |
| TRIM25    | 1 | chr17 |
| ZNF833P   | 1 | chr19 |
| BAHCC1    | 1 | chr17 |
| ECE1      | 1 | chr1  |
| RBP7      | 1 | chr1  |
| TMED10    | 1 | chr14 |
| CDH2      | 1 | chr18 |
| FUT10     | 1 | chr8  |
| SLCO5A1   | 1 | chr8  |
| FAM129C   | 1 | chr19 |
| GFOD1     | 1 | chr6  |
| C2orf83   | 1 | chr2  |
| IFNAR1    | 1 | chr21 |
| TNS1      | 1 | chr2  |
| FAM47B    | 1 | chrX  |
| PTPRM     | 1 | chr18 |
| PARM1     | 1 | chr4  |
| CCDC88C   | 1 | chr14 |
| NXN       | 1 | chr17 |
| AGXT      | 1 | chr2  |
| HELB      | 1 | chr12 |
| TCEAL2    | 1 | chrX  |
| PMF1      | 1 | chr1  |
| PTER      | 1 | chr10 |
| FRMD1     | 1 | chr6  |
| PLS3      | 1 | chrX  |
| INCA1     | 1 | chr17 |
| RUVBL2    | 1 | chr19 |
| LAMA4     | 1 | chr6  |
| NAGPA     | 1 | chr16 |

|           |   |       |
|-----------|---|-------|
| CLIC6     | 1 | chr21 |
| CMPK1     | 1 | chr1  |
| SSU72     | 1 | chr1  |
| CDH1      | 1 | chr16 |
| DRD2      | 1 | chr11 |
| MUC17     | 1 | chr7  |
| MRC2      | 1 | chr17 |
| HTRA1     | 1 | chr10 |
| UBE2H     | 1 | chr7  |
| B3GALTL   | 1 | chr13 |
| DOCK8     | 1 | chr9  |
| DYM       | 1 | chr18 |
| UNC5D     | 1 | chr8  |
| MIR548AN  | 1 | chr13 |
| AP3S2     | 1 | chr15 |
| CEP170B   | 1 | chr14 |
| NKD2      | 1 | chr5  |
| COL14A1   | 1 | chr8  |
| PVRL1     | 1 | chr11 |
| MMP25     | 1 | chr16 |
| GATA4     | 1 | chr8  |
| TRPC5     | 1 | chrX  |
| NRCAM     | 1 | chr7  |
| C1QTNF2   | 1 | chr5  |
| SLC35F6   | 1 | chr2  |
| CMTM8     | 1 | chr3  |
| PDE12     | 1 | chr3  |
| EHD1      | 1 | chr11 |
| SLC12A3   | 1 | chr16 |
| EML1      | 1 | chr14 |
| LOC283692 | 1 | chr15 |
| KLHL15    | 1 | chrX  |
| RFX2      | 1 | chr19 |
| AGPAT3    | 1 | chr21 |
| ATP2B4    | 1 | chr1  |
| C11orf49  | 1 | chr11 |
| TANC1     | 1 | chr2  |
| SCN2A     | 1 | chr2  |
| LOC284009 | 1 | chr17 |
| GMDS      | 1 | chr6  |
| SMOX      | 1 | chr20 |
| C6orf147  | 1 | chr6  |
| MKL2      | 1 | chr16 |

|              |   |       |
|--------------|---|-------|
| ACPL2        | 1 | chr3  |
| SMAD6        | 1 | chr15 |
| SYNGR1       | 1 | chr22 |
| MPP7         | 1 | chr10 |
| EIF4G3       | 1 | chr1  |
| RAB3GAP1     | 1 | chr2  |
| POLR2A       | 1 | chr17 |
| GRM2         | 1 | chr3  |
| TDRD9        | 1 | chr14 |
| NLRP3        | 1 | chr1  |
| PKD1L3       | 1 | chr16 |
| C1QL3        | 1 | chr10 |
| PCDHA9       | 1 | chr5  |
| FANCC        | 1 | chr9  |
| SYS1-DBNDD2  | 1 | chr20 |
| LOC100507194 | 1 | chr6  |
| FGFBP2       | 1 | chr4  |
| CCT3         | 1 | chr1  |
| ANP32B       | 1 | chr9  |
| PRR12        | 1 | chr19 |
| B4GALNT4     | 1 | chr11 |
| SLC38A11     | 1 | chr2  |
| EIF2AK4      | 1 | chr15 |
| INSR         | 1 | chr19 |
| TMEM8A       | 1 | chr16 |
| GTF2IRD1     | 1 | chr7  |
| TNFAIP2      | 1 | chr14 |
| CYTH4        | 1 | chr22 |
| CORO7        | 1 | chr16 |
| SNTG1        | 1 | chr8  |
| TULP2        | 1 | chr19 |
| PCSK4        | 1 | chr19 |
| LOC100289561 | 1 | chr7  |
| KCNA2        | 1 | chr1  |
| FLJ42102     | 1 | chr11 |
| LOC63930     | 1 | chr20 |
| SERPINI1     | 1 | chr3  |
| NRXN1        | 1 | chr2  |
| GAL3ST1      | 1 | chr22 |
| BCL7A        | 1 | chr12 |
| MASP2        | 1 | chr1  |
| PLA2G4C      | 1 | chr19 |
| PPP2R2B      | 1 | chr5  |



|              |   |       |
|--------------|---|-------|
| DNAH11       | 1 | chr7  |
| SFMBT2       | 1 | chr10 |
| FHIT         | 1 | chr3  |
| LOC100131655 | 1 | chr18 |
| MFSD4        | 1 | chr1  |
| SNAPC5       | 1 | chr15 |
| ISM2         | 1 | chr14 |
| CDAN1        | 1 | chr15 |
| FAM227A      | 1 | chr22 |
| SDCCAG3      | 1 | chr9  |
| UBE2F-SCLY   | 1 | chr2  |
| SLC39A6      | 1 | chr18 |
| PCDHA7       | 1 | chr5  |
| RIPK4        | 1 | chr21 |
| NLRC3        | 1 | chr16 |
| TAZ          | 1 | chrX  |
| ERI3         | 1 | chr1  |
| PLVAP        | 1 | chr19 |
| TUFT1        | 1 | chr1  |
| AATK         | 1 | chr17 |
| PTPMT1       | 1 | chr11 |
| KATNAL2      | 1 | chr18 |
| DAGLB        | 1 | chr7  |
| PCCA         | 1 | chr13 |
| MAGEA4       | 1 | chrX  |
| MIR17HG      | 1 | chr13 |
| PCDHB8       | 1 | chr5  |
| TPT1-AS1     | 1 | chr13 |
| PITPNC1      | 1 | chr17 |
| KCNG4        | 1 | chr16 |
| BSN          | 1 | chr3  |
| GCKR         | 1 | chr2  |
| ACSL6        | 1 | chr5  |
| GTF2A1L      | 1 | chr2  |
| CPNE5        | 1 | chr6  |
| TPPP         | 1 | chr5  |
| ERC2         | 1 | chr3  |
| FAM19A1      | 1 | chr3  |
| WDSUB1       | 1 | chr2  |
| GRIN3A       | 1 | chr9  |
| RGS3         | 1 | chr9  |
| EEPD1        | 1 | chr7  |
| C20orf196    | 1 | chr20 |

|           |   |       |
|-----------|---|-------|
| POR       | 1 | chr7  |
| GLP2R     | 1 | chr17 |
| PCDH11X   | 1 | chrX  |
| NRP2      | 1 | chr2  |
| ABO       | 1 | chr9  |
| SLC12A7   | 1 | chr5  |
| MTMR6     | 1 | chr13 |
| SAMD3     | 1 | chr6  |
| PCDHA8    | 1 | chr5  |
| LOC150935 | 1 | chr2  |
| FAM155B   | 1 | chrX  |
| C7orf50   | 1 | chr7  |
| ADAMTS20  | 1 | chr12 |
| PLAUR     | 1 | chr19 |
| ZNF605    | 1 | chr12 |
| RPRD2     | 1 | chr1  |
| PLK5      | 1 | chr19 |
| COL19A1   | 1 | chr6  |
| SLC38A10  | 1 | chr17 |
| LCK       | 1 | chr1  |
| CCDC155   | 1 | chr19 |
| RARB      | 1 | chr3  |
| GALNS     | 1 | chr16 |
| GORASP2   | 1 | chr2  |
| FZR1      | 1 | chr19 |
| PCDHA6    | 1 | chr5  |
| SLC22A18  | 1 | chr11 |
| KCNJ15    | 1 | chr21 |
| RELN      | 1 | chr7  |
| DNAH2     | 1 | chr17 |
| ZNF611    | 1 | chr19 |
| HTR6      | 1 | chr1  |
| C14orf159 | 1 | chr14 |
| RHPN1     | 1 | chr8  |
| KCNMB1    | 1 | chr5  |
| FOXK2     | 1 | chr17 |
| LOC650368 | 1 | chr11 |
| PPP1R37   | 1 | chr19 |
| WDR27     | 1 | chr6  |
| CCDC146   | 1 | chr7  |
| KRAS      | 1 | chr12 |
| SH3PXD2A  | 1 | chr10 |
| CLHC1     | 1 | chr2  |

|               |   |       |
|---------------|---|-------|
| NLRC4         | 1 | chr2  |
| CCDC88B       | 1 | chr11 |
| MRTO4         | 1 | chr1  |
| GRAMD4        | 1 | chr22 |
| KIR3DX1       | 1 | chr19 |
| ZNF385B       | 1 | chr2  |
| NOD1          | 1 | chr7  |
| GFRA1         | 1 | chr10 |
| ITPK1         | 1 | chr14 |
| EEF2          | 1 | chr19 |
| CPS1          | 1 | chr2  |
| LDLRAD3       | 1 | chr11 |
| NR6A1         | 1 | chr9  |
| SCUBE1        | 1 | chr22 |
| SERPINB2      | 1 | chr18 |
| RBMS1         | 1 | chr2  |
| DKFZp686O1327 | 1 | chr2  |
| MCM8          | 1 | chr20 |
| COL18A1       | 1 | chr21 |
| APBA3         | 1 | chr19 |
| MYO15B        | 1 | chr17 |
| PLXNA4        | 1 | chr7  |
| MYOCD         | 1 | chr17 |
| TMEM71        | 1 | chr8  |
| DNAJC15       | 1 | chr13 |
| TLL10         | 1 | chr1  |
| WNT3          | 1 | chr17 |
| RUFY1         | 1 | chr5  |
| MDN1          | 1 | chr6  |
| CTBP1-AS1     | 1 | chr4  |
| INTS2         | 1 | chr17 |
| CANX          | 1 | chr5  |
| SMIM14        | 1 | chr4  |
| PLXNB3        | 1 | chrX  |
| ADRA1D        | 1 | chr20 |
| LOXL2         | 1 | chr8  |
| SCARA5        | 1 | chr8  |
| LOC653712     | 1 | chr3  |
| CCDC134       | 1 | chr22 |
| ZFAND3        | 1 | chr6  |
| DIRAS2        | 1 | chr9  |
| CTNND2        | 1 | chr5  |
| MMD2          | 1 | chr7  |

|              |   |       |
|--------------|---|-------|
| MYBPC2       | 1 | chr19 |
| LOC100630923 | 1 | chr7  |
| COL4A1       | 1 | chr13 |
| CELSR1       | 1 | chr22 |
| SSBP4        | 1 | chr19 |
| CNTLN        | 1 | chr9  |
| C1orf216     | 1 | chr1  |
| MXRA5        | 1 | chrX  |
| LIN52        | 1 | chr14 |
| SKIV2L2      | 1 | chr5  |
| PDZRN3       | 1 | chr3  |
| SLC4A7       | 1 | chr3  |
| RCAN1        | 1 | chr21 |
| IL17F        | 1 | chr6  |
| ARRDC2       | 1 | chr19 |
| PRH1-PRR4    | 1 | chr12 |
| SH3RF3       | 1 | chr2  |
| FBLN7        | 1 | chr2  |
| COPS4        | 1 | chr4  |
| CDC42SE2     | 1 | chr5  |
| NRXN3        | 1 | chr14 |
| PTPRG        | 1 | chr3  |
| CHID1        | 1 | chr11 |
| PLXDC2       | 1 | chr10 |
| NTNG1        | 1 | chr1  |
| TNFRSF13B    | 1 | chr17 |
| CARD11       | 1 | chr7  |
| FAIM2        | 1 | chr12 |
| CATSPERD     | 1 | chr19 |
| PLEKHG4B     | 1 | chr5  |
| TRPM4        | 1 | chr19 |
| ZMAT4        | 1 | chr8  |
| DENND1A      | 1 | chr9  |
| PARVG        | 1 | chr22 |
| OTOR         | 1 | chr20 |
| SVOP         | 1 | chr12 |
| U2AF2        | 1 | chr19 |
| LRRC4B       | 1 | chr19 |
| UNC13A       | 1 | chr19 |
| ZNF578       | 1 | chr19 |
| MKNK1-AS1    | 1 | chr1  |
| TMPRSS11F    | 1 | chr4  |
| MMRN2        | 1 | chr10 |

|            |   |       |
|------------|---|-------|
| KIF25      | 1 | chr6  |
| PHIP       | 1 | chr6  |
| MAFK       | 1 | chr7  |
| GOLGA3     | 1 | chr12 |
| EFHA1      | 1 | chr13 |
| GRAMD1B    | 1 | chr11 |
| GLG1       | 1 | chr16 |
| ADCY3      | 1 | chr2  |
| PHF13      | 1 | chr1  |
| ASB10      | 1 | chr7  |
| PEBP4      | 1 | chr8  |
| TMEM37     | 1 | chr2  |
| TGS1       | 1 | chr8  |
| MAN2B2     | 1 | chr4  |
| CERS1      | 1 | chr19 |
| LMNA       | 1 | chr1  |
| FLNB       | 1 | chr3  |
| ATP8B3     | 1 | chr19 |
| TUBB1      | 1 | chr20 |
| XKR6       | 1 | chr8  |
| DENND2C    | 1 | chr1  |
| AGBL1      | 1 | chr15 |
| ACTG2      | 1 | chr2  |
| MBOAT1     | 1 | chr6  |
| FAM198A    | 1 | chr3  |
| KCNT1      | 1 | chr9  |
| AQP1       | 1 | chr7  |
| TPCN1      | 1 | chr12 |
| LILRA1     | 1 | chr19 |
| PRKD1      | 1 | chr14 |
| TAF4       | 1 | chr20 |
| DOK7       | 1 | chr4  |
| PAQR5      | 1 | chr15 |
| SRSF4      | 1 | chr1  |
| LOC440704  | 1 | chr1  |
| RIMS2      | 1 | chr8  |
| PDZD2      | 1 | chr5  |
| XRCC4      | 1 | chr5  |
| TMEM132D   | 1 | chr12 |
| TRAPPC8    | 1 | chr18 |
| ZRANB2-AS2 | 1 | chr1  |
| JAK1       | 1 | chr1  |
| SNX11      | 1 | chr17 |

|           |   |       |
|-----------|---|-------|
| MUC6      | 1 | chr11 |
| NR2C2     | 1 | chr3  |
| KCNIP4    | 1 | chr4  |
| LRRC15    | 1 | chr3  |
| PLXNB2    | 1 | chr22 |
| SAMD1     | 1 | chr19 |
| DOK2      | 1 | chr8  |
| SPATA13   | 1 | chr13 |
| LINC00359 | 1 | chr13 |
| CINP      | 1 | chr14 |
| ADNP2     | 1 | chr18 |
| DBF4B     | 1 | chr17 |
| CRLF1     | 1 | chr19 |
| RABGAP1L  | 1 | chr1  |
| ZNF346    | 1 | chr5  |
| C20orf78  | 1 | chr20 |
| FTSJ1     | 1 | chrX  |
| SUV420H2  | 1 | chr19 |
| SVIL      | 1 | chr10 |
| MAGIX     | 1 | chrX  |
| SQRDL     | 1 | chr15 |
| GRIK1     | 1 | chr21 |
| ADAP1     | 1 | chr7  |
| MLF1      | 1 | chr3  |
| TRPM5     | 1 | chr11 |
| ATF7IP    | 1 | chr12 |
| GLI2      | 1 | chr2  |
| CACNA1I   | 1 | chr22 |
| ALS2CL    | 1 | chr3  |
| ARVCF     | 1 | chr22 |
| ZNF398    | 1 | chr7  |
| AGPS      | 1 | chr2  |
| PARP8     | 1 | chr5  |
| OSBPL5    | 1 | chr11 |
| ATP2B2    | 1 | chr3  |
| IFNL4     | 1 | chr19 |
| MIR548G   | 1 | chr3  |
| RHOH      | 1 | chr4  |
| NELFB     | 1 | chr9  |
| PDE11A    | 1 | chr2  |
| HOXC5     | 1 | chr12 |
| CNRIP1    | 1 | chr2  |
| RALYL     | 1 | chr8  |

|              |   |       |
|--------------|---|-------|
| KCNQ2        | 1 | chr20 |
| SPON1        | 1 | chr11 |
| PEPD         | 1 | chr19 |
| WDR7         | 1 | chr18 |
| CTDSP2       | 1 | chr12 |
| CDH6         | 1 | chr5  |
| CCDC47       | 1 | chr17 |
| FNDC3B       | 1 | chr3  |
| HIBCH        | 1 | chr2  |
| PARVB        | 1 | chr22 |
| CYP11B1      | 1 | chr8  |
| MYO18B       | 1 | chr22 |
| MGRN1        | 1 | chr16 |
| HS6ST3       | 1 | chr13 |
| EPB41L2      | 1 | chr6  |
| TNFRSF19     | 1 | chr13 |
| SLITRK3      | 1 | chr3  |
| POMT1        | 1 | chr9  |
| PIAS4        | 1 | chr19 |
| DOCK3        | 1 | chr3  |
| LOC100505875 | 1 | chr4  |
| LINC00840    | 1 | chr10 |
| CHMP6        | 1 | chr17 |
| ENOX1        | 1 | chr13 |
| B3GAT1       | 1 | chr11 |
| FMR1NB       | 1 | chrX  |
| NR4A3        | 1 | chr9  |
| DENND1C      | 1 | chr19 |
| ARHGAP4      | 1 | chrX  |
| NFATC4       | 1 | chr14 |
| MYO7A        | 1 | chr11 |
| PIK3R5       | 1 | chr17 |
| DYNC1H1      | 1 | chr14 |
| ZNF7         | 1 | chr8  |
| ESR2         | 1 | chr14 |
| SPOCK3       | 1 | chr4  |
| PCDHA1       | 1 | chr5  |
| GSK3B        | 1 | chr3  |
| KANK4        | 1 | chr1  |
| RHPN1-AS1    | 1 | chr8  |
| UHRF1BP1L    | 1 | chr12 |
| DMTF1        | 1 | chr7  |
| MAEA         | 1 | chr4  |

|            |   |       |
|------------|---|-------|
| IL32       | 1 | chr16 |
| CTCF       | 1 | chr20 |
| NOV        | 1 | chr8  |
| NEURL4     | 1 | chr17 |
| FTHL17     | 1 | chrX  |
| IDO2       | 1 | chr8  |
| GAPVD1     | 1 | chr9  |
| CELF4      | 1 | chr18 |
| C3orf20    | 1 | chr3  |
| CYP26C1    | 1 | chr10 |
| ZNF473     | 1 | chr19 |
| LINC00693  | 1 | chr3  |
| PTX4       | 1 | chr16 |
| SLC13A5    | 1 | chr17 |
| CNTN4      | 1 | chr3  |
| KIAA1751   | 1 | chr1  |
| NRG3       | 1 | chr10 |
| CORO2B     | 1 | chr15 |
| MAD2L2     | 1 | chr1  |
| JARID2     | 1 | chr6  |
| ADCYAP1R1  | 1 | chr7  |
| TUBG2      | 1 | chr17 |
| PACSIN1    | 1 | chr6  |
| TFCP2L1    | 1 | chr2  |
| PLOD1      | 1 | chr1  |
| GRIK2      | 1 | chr6  |
| HTT        | 1 | chr4  |
| AIDA       | 1 | chr1  |
| POU4F1-AS1 | 1 | chr13 |
| SOHLH1     | 1 | chr9  |
| APBA2      | 1 | chr15 |
| RASSF9     | 1 | chr12 |
| DNAH9      | 1 | chr17 |
| ACER1      | 1 | chr19 |
| CXCR3      | 1 | chrX  |
| ST6GAL2    | 1 | chr2  |
| CSE1L      | 1 | chr20 |
| FAM211B    | 1 | chr22 |
| UBE2G1     | 1 | chr17 |
| GREM2      | 1 | chr1  |
| WDR66      | 1 | chr12 |
| DHRS4L1    | 1 | chr14 |
| GBF1       | 1 | chr10 |



|           |   |       |
|-----------|---|-------|
| CDKAL1    | 1 | chr6  |
| CHD1      | 1 | chr5  |
| CXXC11    | 1 | chr2  |
| ATXN7L1   | 1 | chr7  |
| IGFALS    | 1 | chr16 |
| GZMM      | 1 | chr19 |
| CPPED1    | 1 | chr16 |
| KCNK9     | 1 | chr8  |
| TFCP2     | 1 | chr12 |
| GLYATL3   | 1 | chr6  |
| MYO15A    | 1 | chr17 |
| TSIX      | 1 | chrX  |
| C20orf112 | 1 | chr20 |
| CD320     | 1 | chr19 |
| CRMP1     | 1 | chr4  |
| SBF1      | 1 | chr22 |
| ENO1      | 1 | chr1  |
| FLRT2     | 1 | chr14 |
| SETD1B    | 1 | chr12 |
| CASP14    | 1 | chr19 |
| MARS      | 1 | chr12 |
| ZNF804A   | 1 | chr2  |
| PTPRH     | 1 | chr19 |
| PSME3     | 1 | chr17 |
| BAIAP3    | 1 | chr16 |
| ARRB2     | 1 | chr17 |
| MAP3K4    | 1 | chr6  |
| ADCY9     | 1 | chr16 |
| CADPS     | 1 | chr3  |
| WARS2     | 1 | chr1  |
| PPAPDC3   | 1 | chr9  |
| DNAI2     | 1 | chr17 |
| CEP85     | 1 | chr1  |
| AFMID     | 1 | chr17 |
| KIRREL2   | 1 | chr19 |
| AK8       | 1 | chr9  |
| CLOCK     | 1 | chr4  |
| FOXF1     | 1 | chr16 |
| ADA       | 1 | chr20 |
| UQCC      | 1 | chr20 |
| FAM53B    | 1 | chr10 |
| VIPR1     | 1 | chr3  |
| FRMD5     | 1 | chr15 |

|              |   |       |
|--------------|---|-------|
| ENPP6        | 1 | chr4  |
| PCDHA4       | 1 | chr5  |
| STX16-NPEPL1 | 1 | chr20 |
| BOC          | 1 | chr3  |
| STX8         | 1 | chr17 |
| TEX2         | 1 | chr17 |
| PMF1-BGLAP   | 1 | chr1  |
| TRPC4        | 1 | chr13 |
| LOC100130015 | 1 | chr16 |
| CHN1         | 1 | chr2  |
| TMEM198      | 1 | chr2  |
| ATP13A2      | 1 | chr1  |
| NOVA1        | 1 | chr14 |
| SLC26A10     | 1 | chr12 |
| FOXN3        | 1 | chr14 |
| ZDHHC8P1     | 1 | chr22 |
| ATP13A1      | 1 | chr19 |
| ATCAY        | 1 | chr19 |
| SMPX         | 1 | chrX  |
| SERHL2       | 1 | chr22 |
| LOC340094    | 1 | chr5  |
| ASIC2        | 1 | chr17 |
| AVPR1A       | 1 | chr12 |
| GABRB1       | 1 | chr4  |
| DKK3         | 1 | chr11 |
| CCDC61       | 1 | chr19 |
| UBXN6        | 1 | chr19 |
| SEC14L4      | 1 | chr22 |
| CMTM6        | 1 | chr3  |
| SMYD3        | 1 | chr1  |
| IGSF21       | 1 | chr1  |
| TRIM6-TRIM34 | 1 | chr11 |
| FRRS1L       | 1 | chr9  |
| SLC15A4      | 1 | chr12 |
| UGGT2        | 1 | chr13 |
| TAOK1        | 1 | chr17 |
| PPP4R1L      | 1 | chr20 |
| KCNIP1       | 1 | chr5  |
| RGS9BP       | 1 | chr19 |
| AKR1E2       | 1 | chr10 |
| SELM         | 1 | chr22 |
| EVC          | 1 | chr4  |
| UHRF1        | 1 | chr19 |

|             |   |       |
|-------------|---|-------|
| EXOC6B      | 1 | chr2  |
| ANKRD33B    | 1 | chr5  |
| URGCP       | 1 | chr7  |
| NR1I2       | 1 | chr3  |
| ABL1        | 1 | chr9  |
| FKRP        | 1 | chr19 |
| GABRA5      | 1 | chr15 |
| C9orf3      | 1 | chr9  |
| GPSM1       | 1 | chr9  |
| RTTN        | 1 | chr18 |
| MBD5        | 1 | chr2  |
| CXADR       | 1 | chr21 |
| TCF7L1      | 1 | chr2  |
| CNPY1       | 1 | chr7  |
| CD300LG     | 1 | chr17 |
| ATG4B       | 1 | chr2  |
| GRID1       | 1 | chr10 |
| ZNF579      | 1 | chr19 |
| PLD5        | 1 | chr1  |
| OVOL2       | 1 | chr20 |
| FLJ41350    | 1 | chr10 |
| CCKAR       | 1 | chr4  |
| GGT1        | 1 | chr22 |
| CMTM2       | 1 | chr16 |
| PIGN        | 1 | chr18 |
| ARL5C       | 1 | chr17 |
| KCTD8       | 1 | chr4  |
| TENM4       | 1 | chr11 |
| EBF3        | 1 | chr10 |
| COL11A1     | 1 | chr1  |
| SYT6        | 1 | chr1  |
| RGS10       | 1 | chr10 |
| PXDN        | 1 | chr2  |
| WVOX        | 1 | chr16 |
| TMX2-CTNND1 | 1 | chr11 |
| TIMD4       | 1 | chr5  |
| CXCL17      | 1 | chr19 |
| GNAL        | 1 | chr18 |
| BOP1        | 1 | chr8  |
| ADAP2       | 1 | chr17 |
| THSD7A      | 1 | chr7  |
| VAT1L       | 1 | chr16 |
| NEK6        | 1 | chr9  |

|            |   |       |
|------------|---|-------|
| CACNA1D    | 1 | chr3  |
| FERMT1     | 1 | chr20 |
| GRM7       | 1 | chr3  |
| DET1       | 1 | chr15 |
| MOG        | 1 | chr6  |
| INO80D     | 1 | chr2  |
| MGAT4C     | 1 | chr12 |
| SHROOM4    | 1 | chrX  |
| NTM        | 1 | chr11 |
| TTC7B      | 1 | chr14 |
| MADCAM1    | 1 | chr19 |
| ARHGAP42   | 1 | chr11 |
| TCEANC     | 1 | chrX  |
| WWC3       | 1 | chrX  |
| C7orf10    | 1 | chr7  |
| CTNNAL1    | 1 | chr9  |
| ANKK1      | 1 | chr11 |
| MOK        | 1 | chr14 |
| GRM4       | 1 | chr6  |
| ADD2       | 1 | chr2  |
| FBXL7      | 1 | chr5  |
| ITGAL      | 1 | chr16 |
| ISY1-RAB43 | 1 | chr3  |
| CDT1       | 1 | chr16 |
| FOXP1      | 1 | chr3  |
| POLD1      | 1 | chr19 |
| PKD1       | 1 | chr16 |
| DCHS1      | 1 | chr11 |
| KIAA1614   | 1 | chr1  |
| MSRA       | 1 | chr8  |
| SHANK1     | 1 | chr19 |
| CACNA1C    | 1 | chr12 |
| SLC9A9     | 1 | chr3  |
| NAV2       | 1 | chr11 |
| FAM73B     | 1 | chr9  |
| FAM53A     | 1 | chr4  |
| FLJ13197   | 1 | chr4  |
| GPR125     | 1 | chr4  |
| TENM2      | 1 | chr5  |
| SLITRK5    | 1 | chr13 |
| TMEM44     | 1 | chr3  |
| SLC6A3     | 1 | chr5  |
| MCF2L      | 1 | chr13 |

|           |   |       |
|-----------|---|-------|
| FBXL4     | 1 | chr6  |
| SNPH      | 1 | chr20 |
| KALRN     | 1 | chr3  |
| FAR1      | 1 | chr11 |
| ME3       | 1 | chr11 |
| PLAC1L    | 1 | chr11 |
| RBKS      | 1 | chr2  |
| PDE3A     | 1 | chr12 |
| TLR8-AS1  | 1 | chrX  |
| BARHL2    | 1 | chr1  |
| FGD3      | 1 | chr9  |
| GLB1      | 1 | chr3  |
| TRIM42    | 1 | chr3  |
| KNCN      | 1 | chr1  |
| LINC00673 | 1 | chr17 |
| SNX14     | 1 | chr6  |
| SPTB      | 1 | chr14 |
| C2CD2     | 1 | chr21 |
| H6PD      | 1 | chr1  |
| MIER2     | 1 | chr19 |
| LEFTY1    | 1 | chr1  |
| COL4A5    | 1 | chrX  |
| CIT       | 1 | chr12 |
| PATZ1     | 1 | chr22 |
| ENPP7     | 1 | chr17 |
| TGFBRAP1  | 1 | chr2  |
| ZNF169    | 1 | chr9  |
| STXBP6    | 1 | chr14 |
| ALPK2     | 1 | chr18 |
| NEBL      | 1 | chr10 |
| GPATCH8   | 1 | chr17 |
| C1orf106  | 1 | chr1  |
| CRYL1     | 1 | chr13 |
| MSH2      | 1 | chr2  |
| C14orf23  | 1 | chr14 |
| POC1B     | 1 | chr12 |
| MEOX2     | 1 | chr7  |
| PPP2R2C   | 1 | chr4  |
| BTBD2     | 1 | chr19 |
| COL5A3    | 1 | chr19 |
| IFT140    | 1 | chr16 |
| ATG2A     | 1 | chr11 |
| FLJ33534  | 1 | chr2  |

|              |   |       |
|--------------|---|-------|
| DLGAP1       | 1 | chr18 |
| VGLL4        | 1 | chr3  |
| NT5C3        | 1 | chr7  |
| UBR3         | 1 | chr2  |
| SKI          | 1 | chr1  |
| DCTN2        | 1 | chr12 |
| CREBBP       | 1 | chr16 |
| GRM8         | 1 | chr7  |
| SEPSECS      | 1 | chr4  |
| RREB1        | 1 | chr6  |
| STK32A       | 1 | chr5  |
| ARHGEF10L    | 1 | chr1  |
| LOC550113    | 1 | chr4  |
| XYLT1        | 1 | chr16 |
| RAB5B        | 1 | chr12 |
| EPHA2        | 1 | chr1  |
| GAS8         | 1 | chr16 |
| LOC100133050 | 1 | chr5  |
| GSG1L        | 1 | chr16 |
| KLHL21       | 1 | chr1  |
| THRAP3       | 1 | chr1  |
| PTPRE        | 1 | chr10 |
| VSX1         | 1 | chr20 |
| CCDC129      | 1 | chr7  |
| LOC100379224 | 1 | chr19 |
| EFNA2        | 1 | chr19 |
| CLUH         | 1 | chr17 |
| NGB          | 1 | chr14 |
| SLCO2B1      | 1 | chr11 |
| ACOT7        | 1 | chr1  |
| SLC1A6       | 1 | chr19 |
| GRM5         | 1 | chr11 |
| KLB          | 1 | chr4  |
| MRPS35       | 1 | chr12 |
| UNC79        | 1 | chr14 |
| DMD          | 1 | chrX  |
| TMPRSS15     | 1 | chr21 |
| IMPDH1       | 1 | chr7  |
| KLHL22       | 1 | chr22 |
| CABP1        | 1 | chr12 |
| DGCR2        | 1 | chr22 |
| DALRD3       | 1 | chr3  |
| CTU2         | 1 | chr16 |

|               |   |       |
|---------------|---|-------|
| ANO7          | 1 | chr2  |
| IL12RB1       | 1 | chr19 |
| UMODL1        | 1 | chr21 |
| ZNF76         | 1 | chr6  |
| NPRL3         | 1 | chr16 |
| PTCHD3        | 1 | chr10 |
| LOC100996307  | 1 | chr19 |
| CD4           | 1 | chr12 |
| FPGT-TNNI3K   | 1 | chr1  |
| ZDHHC19       | 1 | chr3  |
| CPNE6         | 1 | chr14 |
| ASIC4         | 1 | chr2  |
| ZIC4          | 1 | chr3  |
| VPS33A        | 1 | chr12 |
| ARHGAP24      | 1 | chr4  |
| TNRC18        | 1 | chr7  |
| APAF1         | 1 | chr12 |
| MTOR          | 1 | chr1  |
| RBMS3         | 1 | chr3  |
| LHFPL3        | 1 | chr7  |
| CHMP2A        | 1 | chr19 |
| CENPF         | 1 | chr1  |
| AASDH         | 1 | chr4  |
| MYH3          | 1 | chr17 |
| RTL1          | 1 | chr14 |
| TRA2A         | 1 | chr7  |
| COMMD10       | 1 | chr5  |
| HPCAL1        | 1 | chr2  |
| PRTG          | 1 | chr15 |
| ZNF670-ZNF695 | 1 | chr1  |
| TMEM233       | 1 | chr12 |
| GPR68         | 1 | chr14 |
| UNQ6494       | 1 | chr9  |
| PNPT1         | 1 | chr2  |
| TERT          | 1 | chr5  |
| STK10         | 1 | chr5  |
| ABAT          | 1 | chr16 |
| IL20RA        | 1 | chr6  |
| KAT2B         | 1 | chr3  |
| DRD5          | 1 | chr4  |
| PDE1A         | 1 | chr2  |
| CPT1C         | 1 | chr19 |
| CHST3         | 1 | chr10 |

|              |   |       |
|--------------|---|-------|
| KAZN         | 1 | chr1  |
| SLC43A2      | 1 | chr17 |
| MYBPHL       | 1 | chr1  |
| KLHL6        | 1 | chr3  |
| SLC51A       | 1 | chr3  |
| NUPR1L       | 1 | chr7  |
| GSE1         | 1 | chr16 |
| FRMD8        | 1 | chr11 |
| PDE4A        | 1 | chr19 |
| TLE2         | 1 | chr19 |
| PLA2G3       | 1 | chr22 |
| TIAM1        | 1 | chr21 |
| UBE2E1       | 1 | chr3  |
| APOC1        | 1 | chr19 |
| ITPR1        | 1 | chr3  |
| GRM1         | 1 | chr6  |
| MDM2         | 1 | chr12 |
| TXNRD2       | 1 | chr22 |
| TSPAN2       | 1 | chr1  |
| ETV7         | 1 | chr6  |
| CUL3         | 1 | chr2  |
| C20orf26     | 1 | chr20 |
| GDF1         | 1 | chr19 |
| ARHGEF18     | 1 | chr19 |
| BCAT1        | 1 | chr12 |
| PNMA3        | 1 | chrX  |
| MAML2        | 1 | chr11 |
| SPRN         | 1 | chr10 |
| CDK11B       | 1 | chr1  |
| LOC286467    | 1 | chrX  |
| ENGASE       | 1 | chr17 |
| BCKDK        | 1 | chr16 |
| TXLNA        | 1 | chr1  |
| TNXB         | 1 | chr6  |
| DIRAS1       | 1 | chr19 |
| ATG4D        | 1 | chr19 |
| MND1         | 1 | chr4  |
| GALNT8       | 1 | chr12 |
| FRMD4A       | 1 | chr10 |
| HSF1         | 1 | chr8  |
| HSP90AA1     | 1 | chr14 |
| LOC100507266 | 1 | chr4  |
| DPH1         | 1 | chr17 |



|           |   |       |
|-----------|---|-------|
| NEO1      | 1 | chr15 |
| ABCG1     | 1 | chr21 |
| CYP2B7P1  | 1 | chr19 |
| ARHGAP9   | 1 | chr12 |
| NDUFA7    | 1 | chr19 |
| AAK1      | 1 | chr2  |
| LIX1      | 1 | chr5  |
| TNFRSF8   | 1 | chr1  |
| LOC388796 | 1 | chr20 |
| TPST2     | 1 | chr22 |
| PHKA2     | 1 | chrX  |
| LRP5      | 1 | chr11 |
| GRAMD1A   | 1 | chr19 |
| SPTBN4    | 1 | chr19 |
| ATP2A1    | 1 | chr16 |
| ZNF517    | 1 | chr8  |
| MAPKBP1   | 1 | chr15 |
| CCNG1     | 1 | chr5  |
| BCL2      | 1 | chr18 |
| SH3BP5    | 1 | chr3  |
| TEAD4     | 1 | chr12 |
| DHX58     | 1 | chr17 |
| FBXL17    | 1 | chr5  |
| DGKG      | 1 | chr3  |
| CD97      | 1 | chr19 |
| OSBP2     | 1 | chr22 |
| FAM178B   | 1 | chr2  |
| SNTB1     | 1 | chr8  |
| LINC00661 | 1 | chr19 |
| GRK1      | 1 | chr13 |
| ERBB4     | 1 | chr2  |
| SRPK3     | 1 | chrX  |
| FES       | 1 | chr15 |
| CCDC85C   | 1 | chr14 |
| L3MBTL4   | 1 | chr18 |
| FYCO1     | 1 | chr3  |
| METRNL    | 1 | chr17 |
| USP40     | 1 | chr2  |
| MAP1S     | 1 | chr19 |
| NUDCD1    | 1 | chr8  |
| SEMA3A    | 1 | chr7  |
| OCLN      | 1 | chr5  |
| SULT2A1   | 1 | chr19 |

|            |   |       |
|------------|---|-------|
| PPFIA2     | 1 | chr12 |
| ASB18      | 1 | chr2  |
| CYP27A1    | 1 | chr2  |
| ZFHX4      | 1 | chr8  |
| SEMA5A     | 1 | chr5  |
| EBF4       | 1 | chr20 |
| KBTBD2     | 1 | chr7  |
| SV2B       | 1 | chr15 |
| CCP110     | 1 | chr16 |
| C17orf107  | 1 | chr17 |
| NAA60      | 1 | chr16 |
| KCNQ1      | 1 | chr11 |
| JAKMIP1    | 1 | chr4  |
| GAD1       | 1 | chr2  |
| GIPC2      | 1 | chr1  |
| AOX1       | 1 | chr2  |
| LRRC16A    | 1 | chr6  |
| CHRNE      | 1 | chr17 |
| CBFB       | 1 | chr16 |
| HIVEP3     | 1 | chr1  |
| MOB3B      | 1 | chr9  |
| POLDIP3    | 1 | chr22 |
| FAM109B    | 1 | chr22 |
| PARD6G-AS1 | 1 | chr18 |
| POFUT2     | 1 | chr21 |
| ACE        | 1 | chr17 |
| RNGTT      | 1 | chr6  |
| MYO10      | 1 | chr5  |
| CDON       | 1 | chr11 |
| SRCAP      | 1 | chr16 |
| ZC3H12D    | 1 | chr6  |
| TMTC2      | 1 | chr12 |
| THSD4      | 1 | chr15 |
| TBL1X      | 1 | chrX  |
| LYRM7      | 1 | chr5  |
| TNNT3      | 1 | chr11 |
| PDE1C      | 1 | chr7  |
| EFCAB6     | 1 | chr22 |
| CTNNA3     | 1 | chr10 |
| RHPN2      | 1 | chr19 |
| CLASP1     | 1 | chr2  |
| XXYLT1     | 1 | chr3  |
| ABCC1      | 1 | chr16 |

|                 |   |       |
|-----------------|---|-------|
| NMT1            | 1 | chr17 |
| ART3            | 1 | chr4  |
| RRNAD1          | 1 | chr1  |
| ABR             | 1 | chr17 |
| TULP4           | 1 | chr6  |
| TNIP2           | 1 | chr4  |
| C9orf114        | 1 | chr9  |
| RALGDS          | 1 | chr9  |
| FUT8            | 1 | chr14 |
| ASPSCR1         | 1 | chr17 |
| SEL1L3          | 1 | chr4  |
| ERCC8           | 1 | chr5  |
| KLHDC7B         | 1 | chr22 |
| LMX1B           | 1 | chr9  |
| GRIK3           | 1 | chr1  |
| CDYL            | 1 | chr6  |
| PDGFRL          | 1 | chr8  |
| KHDC1           | 1 | chr6  |
| LCT             | 1 | chr2  |
| CYGB            | 1 | chr17 |
| GNG4            | 1 | chr1  |
| MEGF11          | 1 | chr15 |
| C17orf61-PLSCR3 | 1 | chr17 |
| AATF            | 1 | chr17 |
| PGBD5           | 1 | chr1  |
| LINC00351       | 1 | chr13 |
| NMU             | 1 | chr4  |
| ATP1A1          | 1 | chr1  |
| PCDHA2          | 1 | chr5  |
| AGAP1           | 1 | chr2  |
| TLR6            | 1 | chr4  |
| ARMC2           | 1 | chr6  |
| MYLK3           | 1 | chr16 |
| CACNA2D1        | 1 | chr7  |
| MIR5095         | 1 | chr20 |
| SMARCC2         | 1 | chr12 |
| APOBEC3D        | 1 | chr22 |
| YEATS2          | 1 | chr3  |
| 9-Sep           | 1 | chr17 |
| TMSB15A         | 1 | chrX  |
| FAM129B         | 1 | chr9  |
| SNX27           | 1 | chr1  |
| S1PR3           | 1 | chr9  |

|                |   |       |
|----------------|---|-------|
| DNAH10         | 1 | chr12 |
| CPA6           | 1 | chr8  |
| GPC1           | 1 | chr2  |
| KLHL29         | 1 | chr2  |
| NFASC          | 1 | chr1  |
| SDCCAG8        | 1 | chr1  |
| LINC00478      | 1 | chr21 |
| SLC23A2        | 1 | chr20 |
| GLB1L2         | 1 | chr11 |
| MCM3AP         | 1 | chr21 |
| LOC100287944   | 1 | chr12 |
| P2RX4          | 1 | chr12 |
| ENO4           | 1 | chr10 |
| LOC100128675   | 1 | chr19 |
| CTPS2          | 1 | chrX  |
| C15orf38-AP3S2 | 1 | chr15 |
| TUBB3          | 1 | chr16 |
| TMEM63A        | 1 | chr1  |
| TMEM220-AS1    | 1 | chr17 |
| RSPH9          | 1 | chr6  |
| TENM1          | 1 | chrX  |
| PCDHA3         | 1 | chr5  |
| UVRAG          | 1 | chr11 |
| CPNE7          | 1 | chr16 |
| SHD            | 1 | chr19 |
| C9orf84        | 1 | chr9  |
| PTGS1          | 1 | chr9  |
| DKK4           | 1 | chr8  |
| FFAR1          | 1 | chr19 |
| PAPLN          | 1 | chr14 |
| SGTA           | 1 | chr19 |
| ZNF890P        | 1 | chr7  |
| CNTNAP3        | 1 | chr9  |
| IRF2           | 1 | chr4  |
| PLIN3          | 1 | chr19 |
| KAL1           | 1 | chrX  |
| LOC100873065   | 1 | chrX  |
| RFC2           | 1 | chr7  |
| SNX30          | 1 | chr9  |
| OBP2B          | 1 | chr9  |
| NFRKB          | 1 | chr11 |
| MLL3           | 1 | chr7  |
| C1QTNF6        | 1 | chr22 |

|            |   |       |
|------------|---|-------|
| TBC1D30    | 1 | chr12 |
| USH2A      | 1 | chr1  |
| RAD17      | 1 | chr5  |
| LIG1       | 1 | chr19 |
| TOM1L1     | 1 | chr17 |
| SLITRK4    | 1 | chrX  |
| FLT4       | 1 | chr5  |
| SBNO2      | 1 | chr19 |
| ANKFY1     | 1 | chr17 |
| R3HCC1L    | 1 | chr10 |
| MPPED2     | 1 | chr11 |
| VAV1       | 1 | chr19 |
| HOXC4      | 1 | chr12 |
| ABCB5      | 1 | chr7  |
| ZNF276     | 1 | chr16 |
| EXOC3      | 1 | chr5  |
| WNT7B      | 1 | chr22 |
| BICD1      | 1 | chr12 |
| SPAG9      | 1 | chr17 |
| DNAL4      | 1 | chr22 |
| CDH3       | 1 | chr16 |
| KIRREL3    | 1 | chr11 |
| KIAA1875   | 1 | chr8  |
| CHODL      | 1 | chr21 |
| BPTF       | 1 | chr17 |
| LOC284379  | 1 | chr19 |
| LINC00469  | 1 | chr17 |
| NCS1       | 1 | chr9  |
| SMC1B      | 1 | chr22 |
| IGF2R      | 1 | chr6  |
| GATAD2A    | 1 | chr19 |
| TCF20      | 1 | chr22 |
| TMEM132B   | 1 | chr12 |
| NUBPL      | 1 | chr14 |
| XIAP       | 1 | chrX  |
| TNNI3K     | 1 | chr1  |
| MUC16      | 1 | chr19 |
| WDR90      | 1 | chr16 |
| ERMAP      | 1 | chr1  |
| SESTD1     | 1 | chr2  |
| ADARB2-AS1 | 1 | chr10 |
| ABCG2      | 1 | chr4  |
| SMOC1      | 1 | chr14 |

|           |   |       |
|-----------|---|-------|
| CYFIP1    | 1 | chr15 |
| CASC2     | 1 | chr10 |
| ANKS1B    | 1 | chr12 |
| CCDC66    | 1 | chr3  |
| THBS2     | 1 | chr6  |
| KRT5      | 1 | chr12 |
| RIN1      | 1 | chr11 |
| ELOVL5    | 1 | chr6  |
| ST3GAL1   | 1 | chr8  |
| KSR2      | 1 | chr12 |
| ITM2A     | 1 | chrX  |
| JMJD1C    | 1 | chr10 |
| RRP12     | 1 | chr10 |
| EPB41L1   | 1 | chr20 |
| RPL23AP53 | 1 | chr8  |
| KIAA1432  | 1 | chr9  |
| TLX2      | 1 | chr2  |
| MASP1     | 1 | chr3  |
| SLC38A7   | 1 | chr16 |
| ST8SIA5   | 1 | chr18 |
| LAMA3     | 1 | chr18 |
| TRPM2     | 1 | chr21 |
| ZFYVE28   | 1 | chr4  |
| ARHGEF9   | 1 | chrX  |
| NXF1      | 1 | chr11 |
| LOC643542 | 1 | chr18 |
| PCSK6     | 1 | chr15 |
| CDH24     | 1 | chr14 |
| HMMR      | 1 | chr5  |
| CACNA2D2  | 1 | chr3  |
| TFDP2     | 1 | chr3  |
| CAPN13    | 1 | chr2  |
| CAMSAP3   | 1 | chr19 |
| ITGBL1    | 1 | chr13 |
| AP3B2     | 1 | chr15 |
| TCEB3C    | 1 | chr18 |
| ASCL3     | 1 | chr11 |
| INF2      | 1 | chr14 |
| SEC14L1   | 1 | chr17 |
| RTFDC1    | 1 | chr20 |
| CIITA     | 1 | chr16 |
| NR5A2     | 1 | chr1  |
| RAB43     | 1 | chr3  |

|              |   |       |
|--------------|---|-------|
| PIK3R4       | 1 | chr3  |
| ZNF99        | 1 | chr19 |
| NPEPL1       | 1 | chr20 |
| SSBP3        | 1 | chr1  |
| CPT1A        | 1 | chr11 |
| HADHA        | 1 | chr2  |
| LINC00294    | 1 | chr11 |
| LSP1         | 1 | chr11 |
| LECT1        | 1 | chr13 |
| OPCML        | 1 | chr11 |
| SPATS2       | 1 | chr12 |
| CDH23        | 1 | chr10 |
| C4orf45      | 1 | chr4  |
| ITPR2        | 1 | chr12 |
| NFIX         | 1 | chr19 |
| FCHO1        | 1 | chr19 |
| PARD6B       | 1 | chr20 |
| ZNF175       | 1 | chr19 |
| URGCP-MRPS24 | 1 | chr7  |
| ESPL1        | 1 | chr12 |
| KIAA1211     | 1 | chr4  |
| AGO2         | 1 | chr8  |
| STK11        | 1 | chr19 |
| TMEM132C     | 1 | chr12 |
| CALN1        | 1 | chr7  |
| CACNA2D4     | 1 | chr12 |
| SLC44A4      | 1 | chr6  |
| ST3GAL2      | 1 | chr16 |
| CAD          | 1 | chr2  |
| C14orf178    | 1 | chr14 |
| AUTS2        | 1 | chr7  |
| MIR548I4     | 1 | chr7  |
| WDFY4        | 1 | chr10 |
| PRKXP1       | 1 | chr15 |
| UBE2W        | 1 | chr8  |
| HID1         | 1 | chr17 |
| SMIM5        | 1 | chr17 |
| TET1         | 1 | chr10 |
| DSE          | 1 | chr6  |
| MIR143HG     | 1 | chr5  |
| VSX2         | 1 | chr14 |
| KSR1         | 1 | chr17 |
| FAM160B1     | 1 | chr10 |

|           |   |       |
|-----------|---|-------|
| ANO3      | 1 | chr11 |
| TCEB3CL   | 1 | chr18 |
| TJP2      | 1 | chr9  |
| EYA2      | 1 | chr20 |
| RBFOX1    | 1 | chr16 |
| PCDHA5    | 1 | chr5  |
| GRIK1-AS1 | 1 | chr21 |
| LHPP      | 1 | chr10 |
| HDGFL1    | 1 | chr6  |
| IL6R      | 1 | chr1  |
| ADAM11    | 1 | chr17 |
| BABAM1    | 1 | chr19 |
| ZNF407    | 1 | chr18 |
| ACSM1     | 1 | chr16 |



## site locations

138136408,138136474,138277060,138277067,138277085,138277119,138277122,138277129,138277136,138277143,138277150,138277157,138277164,138277171,138277178,138277185,138277192,138277199,138277206,138277213,138277220,138277227,138277234,138277241,138277248,138277255,138277262,138277269,138277276,138277283,138277290,138277297,138277304,138277311,138277318,138277325,138277332,138277339,138277346,138277353,138277360,138277367,138277374,138277381,138277388,138277395,138277402,138277409,138277416,138277423,138277430,138277437,138277444,138277451,138277458,138277465,138277472,138277479,138277486,138277493,138277500,138277507,138277514,138277521,138277528,138277535,138277542,138277549,138277556,138277563,138277570,138277577,138277584,138277591,138277598,138277605,138277612,138277619,138277626,138277633,138277640,138277647,138277654,138277661,138277668,138277675,138277682,138277689,138277696,138277703,138277710,138277717,138277724,138277731,138277738,138277745,138277752,138277759,138277766,138277773,138277780,138277787,138277794,138277801,138277808,138277815,138277822,138277829,138277836,138277843,138277850,138277857,138277864,138277871,138277878,138277885,138277892,138277899,138277906,138277913,138277920,138277927,138277934,138277941,138277948,138277955,138277962,138277969,138277976,138277983,138277990,138277997,138278004,138278011,138278018,138278025,138278032,138278039,138278046,138278053,138278060,138278067,138278074,138278081,138278088,138278095,138278102,138278109,138278116,138278123,138278130,138278137,138278144,138278151,138278158,138278165,138278172,138278179,138278186,138278193,138278200,138278207,138278214,138278221,138278228,138278235,138278242,138278249,138278256,138278263,138278270,138278277,138278284,138278291,138278298,138278305,138278312,138278319,138278326,138278333,138278340,138278347,138278354,138278361,138278368,138278375,138278382,138278389,138278396,138278403,138278410,138278417,138278424,138278431,138278438,138278445,138278452,138278459,138278466,138278473,138278480,138278487,138278494,138278501,138278508,138278515,138278522,138278529,138278536,138278543,138278550,138278557,138278564,138278571,138278578,138278585,138278592,138278599,138278606,138278613,138278620,138278627,138278634,138278641,138278648,138278655,138278662,138278669,138278676,138278683,138278690,138278697,138278704,138278711,138278718,138278725,138278732,138278739,138278746,138278753,138278760,138278767,138278774,138278781,138278788,138278795,138278802,138278809,138278816,138278823,138278830,138278837,138278844,138278851,138278858,138278865,138278872,138278879,138278886,138278893,138278900,138278907,138278914,138278921,138278928,138278935,138278942,138278949,138278956,138278963,138278970,138278977,138278984,138278991,138278998,138279005,138279012,138279019,138279026,138279033,138279040,138279047,138279054,138279061,138279068,138279075,138279082,138279089,138279096,138279103,138279110,138279117,138279124,138279131,138279138,138279145,138279152,138279159,138279166,138279173,138279180,138279187,138279194,138279201,138279208,138279215,138279222,138279229,138279236,138279243,138279250,138279257,138279264,138279271,138279278,138279285,138279292,138279299,138279306,138279313,138279320,138279327,138279334,138279341,138279348,138279355,138279362,138279369,138279376,138279383,138279390,138279397,138279404,138279411,138279418,138279425,138279432,138279439,138279446,138279453,138279460,138279467,138279474,138279481,138279488,138279495,138279502,138279509,138279516,138279523,138279530,138279537,138279544,138279551,138279558,138279565,138279572,138279579,138279586,138279593,138279600,138279607,138279614,138279621,138279628,138279635,138279642,138279649,138279656,138279663,138279670,138279677,138279684,138279691,138279698,138279705,138279712,138279719,138279726,138279733,138279740,138279747,138279754,138279761,138279768,138279775,138279782,138279789,138279796,138279803,138279810,138279817,138279824,138279831,138279838,138279845,138279852,138279859,138279866,138279873,138279880,138279887,138279894,138279901,138279908,138279915,138279922,138279929,138279936,138279943,138279950,138279957,138279964,138279971,138279978,138279985,138279992,138279999,138280006,138280013,138280020,138280027,138280034,138280041,138280048,138280055,138280062,138280069,138280076,138280083,138280090,138280097,138280104,138280111,138280118,138280125,138280132,138280139,138280146,138280153,138280160,138280167,138280174,138280181,138280188,138280195,138280202,138280209,138280216,138280223,138280230,138280237,138280244,138280251,138280258,138280265,138280272,138280279,138280286,138280293,138280300,138280307,138280314,138280321,138280328,138280335,138280342,138280349,138280356,138280363,138280370,138280377,138280384,138280391,138280398,138280405,138280412,138280419,138280426,138280433,138280440,138280447,138280454,138280461,138280468,138280475,138280482,138280489,138280496,138280503,138280510,138280517,138280524,138280531,138280538,138280545,138280552,138280559,138280566,138280573,138280580,138280587,138280594,138280601,138280608,138280615,138280622,138280629,138280636,138280643,138280650,138280657,138280664,138280671,138280678,138280685,138280692,138280699,138280706,138280713,138280720,138280727,138280734,138280741,138280748,138280755,138280762,138280769,138280776,138280783,138280790,138280797,138280804,138280811,138280818,138280825,138280832,138280839,138280846,138280853,138280860,138280867,138280874,138280881,138280888,138280895,138280902,138280909,138280916,138280923,138280930,138280937,138280944,138280951,138280958,138280965,138280972,138280979,138280986,138280993,138280999,138281006,138281013,138281020,138281027,138281034,138281041,138281048,138281055,138281062,138281069,138281076,138281083,138281090,138281097,138281104,138281111,138281118,138281125,138281132,138281139,138281146,138281153,138281160,138281167,138281174,138281181,138281188,138281195,138281202,138281209,138281216,138281223,138281230,138281237,138281244,138281251,138281258,138281265,138281272,138281279,138281286,138281293,138281300,138281307,138281314,138281321,138281328,138281335,138281342,138281349,138281356,138281363,138281370,138281377,138281384,138281391,138281398,138281405,138281412,138281419,138281426,138281433,138281440,138281447,138281454,138281461,138281468,138281475,138281482,138281489,138281496,138281503,138281510,138281517,138281524,138281531,138281538,138281545,138281552,138281559,138281566,138281573,138281580,138281587,138281594,138281601,138281608,138281615,138281622,138281629,138281636,138281643,138281650,138281657,138281664,138281671,138281678,138281685,138281692,138281699,138281706,138281713,138281720,138281727,138281734,138281741,138281748,138281755,138281762,138281769,138281776,138281783,138281790,138281797,138281804,138281811,138281818,138281825,138281832,138281839,138281846,138281853,138281860,138281867,138281874,138281881,138281888,138281895,138281902,138281909,138281916,138281923,138281930,138281937,138281944,138281951,138281958,138281965,138281972,138281979,138281986,138281993,138281999,138282006,138282013,138282020,138282027,138282034,138282041,138282048,138282055,138282062,138282069,138282076,138282083,138282090,138282097,138282104,138282111,138282118,138282125,138282132,138282139,138282146,138282153,138282160,138282167,138282174,138282181,138282188,138282195,138282202,138282209,138282216,138282223,138282230,138282237,138282244,138282251,138282258,138282265,138282272,138282279,138282286,138282293,138282300,138282307,138282314,138282321,138282328,138282335,138282342,138282349,138282356,138282363,138282370,138282377,138282384,138282391,138282398,138282405,138282412,138282419,138282426,138282433,138282440,138282447,138282454,138282461,138282468,138282475,138282482,138282489,138282496,138282503,138282510,138282517,138282524,138282531,138282538,138282545,138282552,138282559,138282566,138282573,138282580,138282587,138282594,138282601,138282608,138282615,138282622,138282629,138282636,138282643,138282650,138282657,138282664,138282671,138282678,138282685,138282692,138282699,138282706,138282713,138282720,138282727,138282734,138282741,138282748,138282755,138282762,138282769,138282776,138282783,138282790,138282797,138282804,138282811,138282818,138282825,138282832,138282839,138282846,138282853,138282860,138282867,138282874,138282881,138282888,138282895,138282902,138282909,138282916,138282923,138282930,138282937,138282944,138282951,138282958,138282965,138282972,138282979,138282986,138282993,138282999,138283006,138283013,138283020,138283027,138283034,138283041,138283048,138283055,138283062,138283069,138283076,138283083,138283090,138283097,138283104,138283111,138283118,138283125,138283132,138283139,138283146,138283153,138283160,138283167,138283174,138283181,138283188,138283195,138283202,138283209,138283216,138283223,138283230,138283237,138283244,138283251,138283258,138283265,138283272,138283279,138283286,138283293,138283300,138283307,138283314,138283321,138283328,138283335,138283342,138283349,138283356,138283363,138283370,138283377,138283384,138283391,138283398,138283405,138283412,138283419,138283426,138283433,138283440,138283447,138283454,138283461,138283468,138283475,138283482,138283489,138283496,138283503,138283510,138283517,138283524,138283531,138283538,138283545,138283552,138283559,138283566,138283573,138283580,138283587,138283594,138283601,138283608,138283615,138283622,138283629,138283636,138283643,138283650,138283657,138283664,138283671,138283678,138283685,138283692,138283699,138283706,138283713,138283720,138283727,138283734,138283741,138283748,138283755,138283762,138283769,138283776,138283783,138283790,138283797,138283804,138283811,138283818,138283825,138283832,138283839,138283846,138283853,138283860,138283867,138283874,138283881,138283888,138283895,138283902,138283909,138283916,138283923,138283930,138283937,138283944,138283951,138283958,138283965,138283972,138283979,138283986,138283993,138283999,138284006,138284013,138284020,138284027,138284034,138284041,138284048,138284055,138284062,138284069,138284076,138284083,138284090,138284097,138284104,138284111,138284118,138284125,138284132,138284139,138284146,138284153,138284160,138284167,138284174,138284181,138284188,138284195,138284202,138284209,138284216,138284223,138284230,138284237,138284244,138284251,138284258,138284265,138284272,138284279,138284286,138284293,138284300,138284307,138284314,138284321,138284328,138284335,138284342,138284349,138284356,138284363,138284370,138284377,138284384,138284391,138284398,138284405,138284412,138284419,138284426,138284433,138284440,138284447,138284454,138284461,138284468,138284475,138284482,138284489,138284496,138284503,138284510,138284517,138284524,138284531,138284538,138284545,138284552,138284559,138284566,138284573,138284580,138284587,138284594,138284601,138284608,138284615,138284622,138284629,138284636,138284643,138284650,138284657,138284664,138284671,138284678,138284685,138284692,138284699,138284706,138284713,138284720,138284727,138284734,138284741,138284748,138284755,138284762,138284769,138284776,138284783,138284790,138284797,138284804,138284811,138284818,138284825,138284832,138284839,138284846,138284853,138284860,138284867,138284874,138284881,138284888,138284895,138284902,138284909,138284916,138284923,138284930,138284937,138284944,138284951,138284958,138284965,138284972,138284979,138284986,138284993,138284999,138285006,138285013,138285020,138285027,138285034,138285041,138285048,138285055,138285062,138285069,138285076,138285083,138285090,138285097,138285104,138285111,138285118,138285125,138285132,138285139,138285146,138285153,138285160,138285167,138285174,138285181,138285188,138285195,138285202,138285209,138285216,138285223,138285230,138285237,138285244,138285251,138285258,138285265,138285272,138285279,138285286,138285293,138285300,138285307,138285314,138285321,138285328,138285335,138285342,138285349,138285356,138285363,138285370,138285377,138285384,138285391,138285398,138285405,138285412,138285419,138285426,138285433,138285440,138285447,138285454,138285461,138285468,138285475,138285482,138285489,138285496,138285503,138285510,138285517,138285524,138285531,138285538,138285545,138285552,138285559,138285566,138285573,138285580,138285587,138285594,138285601,138285608,138285615,138285622,138285629,138285636,138285643,138285650,138285657,138285664,138285671,138285678,138285685,138285

63904583,63859606,63859688,63859699,63904587  
8595648,8595660,8595680,8595688,8595725  
3389435,3393710,3393779,3918065,4134106  
168918740,168928224,168842713,168842764,168876493  
146445528,146050135,146191221,146335866,147179769  
245328353,245381025,245681000,245858319,245715801  
162850908,162106955,162254655,162947410,163096348  
139715724,139715740,139715749,139715775,139715786  
167182469,166944382,166944388,167196031,167196063  
3644890,3645428,3648757,3660867,3683201  
154585884,154585887,154585915,154585966,154585968  
40459032,40187425,40250914,41086726,41330514  
32721664,32721665,32770187,32770312,32770392  
1488473,1496555,1493528,1522661,1522683  
108486614,108554450,108554540,108715748,108715812  
1840468,1841741,1921777,1921953,1921980  
2310576,2258323,2267385,2267568,2267637  
3413503,3413504,3450637,3493818,3493819  
132329206,132326291,132334754,132334766,132334777  
80829706,80829707,80895510,80895531,80898093  
117667058,117327550,117327685,117544836,117566161  
197033959,197033987,197034009,197034039  
15117477,15127614,15127623,15258423  
134681693,134623694,134623726,134737190  
1148048,1130889,1164139,1169021  
748829,872324,1018732,1061073  
28476494,28476508,28476562,28476564  
2040776,2041154,2048727,2101059  
99662812,99662857,99662864,99662866  
3423441,3374037,3374161,3407788  
1475095,1475099,1475142,1475188  
133785745,133787347,133789012,133794455  
139715360,139884273,139884372,140060540  
70424607,70347727,70425842,70425843  
79258966,79368458,79368495,79368511  
50034477,50031073,50044220,50044252  
129048851,129049534,129191646,128900119  
124642802,124786052,124799642,124545513  
143568926,143660477,143660568,143767895  
143165992,143111464,143111498,143208214  
177546160,177548186,177548195,177548237  
77204990,77207251,77221474,77221560  
19571316,19656650,19656674,19703344

105518006,105518015,105518054,105518091  
178701724,178576680,178665526,178689460  
219186591,219146078,219146079,219146139  
21001865,21001926,21035108,21043852  
22086598,22116020,21831003,22345991  
29584256,29784212,28765650,29226624  
14260075,14275845,14310765,14310797  
33609541,33652116,33993318,33993357  
239997710,240043297,240156475,240270095  
38803489,38849546,38865411,38865415  
92482536,92347650,92577340,92635364  
22385757,22385813,22385820,22851625  
5998344,5998328,5998366,5998367  
961894,1048960,1048969,1059734  
114555024,114555065,114558565,114558566  
113362104,113379148,113398928  
26948220,26971734,26971735  
204417023,204434779,204436065  
148904623,148904794,148909758  
130845150,130841923,130842141  
101226215,101226328,101226340  
61547236,61547237,61533335  
58099159,58172471,58566803  
14108628,14048300,14687543  
13358272,13397703,13593094  
18492560,18492567,18492576  
242706956,242707659,242707772  
124219472,124219538,124219544  
13225980,13491894,13571929  
178701724,178665526,178689460  
29502055,29502060,29703604  
77379705,77667267,77667277  
124946152,124993635,125119775  
846798,725432,863256  
62955264,62955265,62990409  
36120888,36101742,36227031  
77204766,77240602,77253849  
38554304,38697052,38697053  
156878419,156878421,156883491  
136340458,136341293,136341305  
21134595,21134596,21361300  
133906248,133906955,133906956  
100545379,100260559,100260560

15966163,15984559,15984564  
42854072,42863209,42863215  
135342076,135389134,135389223  
41951575,41962818,41882537  
60924151,61383283,61489557  
114418617,114423197,114423215  
67139912,67142112,67142113  
64492,96927,135237  
58552731,58545712,58545730  
70837080,70880637,70896088  
32116931,32116933,32116963  
9963395,9963484,9963487  
18281728,18398207,18459859  
237382688,237382689,237263846  
130989049,130935425,130935954  
140930848,140945894,140968750  
241653710,241686403,241686408  
68821614,68821860,68853503  
45113150,45117629,45187318  
36849007,36849086,36849087  
18236885,18236927,18237215  
50160519,50661499,50661515  
36120888,36101742,36227031  
125834973,125835068,125836294  
23505467,23505575,23505616  
151083585,151085415,151102302  
6213284,6213311,6213321  
107241950,107241964,107242008  
93833054,93822300,93822310  
45978046,45981293,45981447  
139101770,139109526,139129414  
34181314,34188708,34214991  
101903335,101915394,101924537  
136778878,136665987,136842677  
45123944,45123954,45124734  
168827493,168839060,169039199  
83619828,83679935,83679983  
175269482,174850766,174850843  
125258266,125287393,125287394  
133014079,133014095,133014097  
219146078,219146079,219146139  
131519660,131521885,131549814  
173103159,173030020,173748345

76442925,76565604,76565662  
12412836,12412837,12739548  
16269140,16269141  
11023984,11024198  
21892979,21892980  
30595325,30896751  
56732799,56733571  
33132490,33132491  
34610181,34610253  
141002309,141014701  
101134053,101138965  
11591802,11591812  
2131565,2131578  
48841796,48844977  
4190519,4190586  
48689798,48689799  
65216632,65391560  
236754256,237021344  
19787307,19796766  
41159390,41249375  
18398207,18459859  
62555971,62565833  
53000108,53000115  
25847088,25847089  
58299811,58300770  
52995043,52995070  
1777815,1778321  
25186115,25202891  
619587,619634  
77674633,77683125  
2601809,2622405  
233399443,233399444  
96378109,96379614  
15636141,15636155  
607040,608392  
4094774,4102448  
127827885,127827913  
2876748,2948452  
29968344,30111409  
72350966,72351017  
73669043,73681089  
1474475,1475514  
144081249,144067531

134941997,134943031  
234663626,234663653  
151439827,151488536  
131069818,131427223  
68038697,68045840  
234663626,234663653  
1001560,1002229  
143545918,143545931  
136648374,136648854  
25426949,25448652  
124061501,124089034  
8421091,8421092  
101915394,101924537  
93523365,93869138  
75372848,75285469  
150194484,150202102  
65239877,65220461  
86323612,86457243  
117846079,117846080  
112049875,112021706  
121191208,121191186  
234663626,234663653  
114232907,114232931  
127860879,127861446  
234663626,234663653  
651516,678843  
183713815,183713816  
72083976,72084146  
126160676,126682467  
2824332,2719187  
14912168,14964125  
144392601,144392602  
77903267,77907409  
133766907,133766952  
14712665,14712697  
18517936,18517945  
169424570,169424571  
24673986,24832885  
3491070,3491082  
25347469,25366078  
988260,988335  
73526987,73580257  
241018822,241402337

67361031,67355844  
35369244,35370007  
74015925,74016147  
355048,435782  
47546079,47546166  
925278,940247  
104628693,104628749  
19573547,19573576  
114821692,114845244  
45488093,45490426  
3263758,3264693  
90808839,90808842  
43044767,43044775  
234663626,234663653  
50318505,50319700  
83896149,83856659  
50191970,50209854  
15576599,15576600  
131964356,132187312  
129417210,129452098  
46422998,46424361  
58610256,58610257  
76186886,76198457  
69042742,69042827  
73430150,73430433  
152746484,152746485  
1354210,1362912  
99047710,99047711  
2103242,2131289  
44302635,44303189  
166944382,166944388  
19411480,19412335  
47327858,47768048  
1464589,1464605  
75170673,75185899  
227146132,227170004  
72359682,72359705  
124786052,124799642  
38794450,38794465  
79862481,80188763  
137288499,137308241  
29675927,29676041  
98132016,98131430

5144667,5154846  
40187425,40250914  
31059156,31059158  
3013017,3040555  
1804959,1805004  
60926221,60930091  
39186109,39233975  
242434315,242436237  
134423349,134550099  
3660867,3683201  
2198844,2226675  
70775172,70815636  
878078,889943  
109933638,110152070  
2807373,2810246  
52317473,52317474  
21710960,21710964  
139833255,139883644  
132966947,132976407  
74709973,74711409  
93598438,93602036  
40501478,40507830  
62432152,62432177  
129702080,129702081  
219691685,219691758  
44280703,44290375  
214822,226491  
2291790,2293508  
149980430,149980516  
168827493,168839060  
74102048,74102054  
136030518,136213285  
132947536,132970927  
291073,291094  
140653360,140652571  
44166374,44151092  
444996,670243  
43946639,43979388  
2522201,2522203  
83392560,83392644  
16475386,16475387  
27015760,27015761  
8019279,8050765



52837554,52837614  
24739182,24739250  
19978899,19978970  
22136995,22137039  
94612374,94612417  
77629166,77629328  
78483350,78492213  
34642490,34642383  
202638788,202638789  
102954922,102966001  
5238770,5263766  
67197164,67197166  
139905818,139904754  
71107222,71156732  
57165682,57165688  
223566798,223566800  
111342297,111313236  
779604,779687  
234663626,234663653  
14260075,14275845  
70601147,70856188  
71569684,71858218  
196659997,196660059  
37450839,37457414  
1087887,1081376  
39271537,39271538  
113649235,113705141  
69971133,69979164  
115954765,116584034  
25441432,25441935  
80617214,80620340  
113981251,114047138  
455242,455450  
241976625,241976708  
77080287,76910759  
234663626,234663653  
3255736,3255741  
100667714,100800292  
61981617,61987340  
128340650,128367090  
2522201,2522203  
132268143,132268184  
196693709,196694955

78820926,78934475  
16787669,16787670  
234663626,234663653  
31353414,31353415  
16298268,16298269  
11687184,11611732  
40539656,40539661  
5952239,5952240  
63269640,63269641  
92934607,92938402  
73627904,73635178  
125448959,125455371  
5774950,5802998  
41802809,41903187  
24341072,24336129  
219328681,219404207  
101944241,101944246  
154693964,154694024  
112525024,112525031  
71797711,71692546  
28249145,28256783  
897518,898967  
45113150,45117629  
36590578,36590622  
58530075,58530197  
11226692,11432290  
42492062,42492104  
119898276,119898281  
66602320,66693644  
161575874,161575910  
61962859,61962873  
16335739,16339715  
130918981,130902391  
1168532,1168540  
84608934,84615224  
159519410,159519451  
43960833,43969528  
22157543,22204506  
1206496,1206503  
99504127,99206152  
93364910,93795025  
26087639,26087655  
31523685,31523720

3227545,3277484  
37549199,37552988  
72682846,72804801  
27886902,27886903  
1790861,1887563  
99627094,99751599  
2041493,2041581  
23995795,24049350  
99047710,99047711  
45565093,45565384  
89896790,90018316  
232933589,233187953  
1777815,1778321  
88793822,88797567  
14334,14352  
19978899,19978970  
114161310,114166775  
19245994,19245995  
50935282,50935283  
46858444,46892956  
72793575,72939978  
49724869,49835124  
44812007,44892455  
138973585,138974330  
168474308,168479602  
48205286,48205287  
22100962,22100963  
54500140,54500162  
5048201,5095792  
101119953,101120187  
1252535,1252536  
57161275,57177663  
71031784,70778561  
3021471,3021601  
234663626,234663653  
103279412  
35718191  
138731842  
81176816  
138416120  
2871451  
62041061  
55644017

229683263  
84514963  
36975759  
6143145  
10995039  
17449381  
49106994  
2539644  
13663441  
44486917  
232933589  
4866005  
23848310  
42143536  
17188322  
8088757  
142459700  
169670888  
49855167  
150226650  
233566677  
93869138  
5455605  
72949954  
114299514  
49277055  
8278123  
10543484  
99036839  
25144907  
157650299  
67040333  
52883210  
8993970  
214490660  
241531172  
12602043  
2635811  
81929693  
128357764  
16085921  
179566610  
31035585

186536056  
137005022  
77795764  
139975195  
51654601  
51045142  
65412778  
77774949  
20408076  
44330555  
28296877  
188918166  
58879005  
98813152  
45941327  
21895228  
30440216  
143747271  
130636267  
1520843  
4435161  
75240956  
10247268  
2742236  
35332660  
40568734  
29931152  
64790137  
1245005  
238947612  
45425257  
76400505  
120798926  
39002389  
85133800  
63839041  
46417795  
71797711  
2580888  
78404394  
2949569  
100247412  
172265745

105815572  
56978169  
143727259  
18671899  
8392394  
9588490  
22287860  
113816394  
57552264  
74529576  
70698846  
99373556  
153073318  
36749530  
6238960  
29129929  
149463220  
247126920  
41122515  
42805236  
148480233  
32677157  
50974035  
22927142  
1135221  
175266506  
53301757  
129385813  
15568514  
70194623  
49517215  
197665044  
56295504  
45187318  
66130534  
29101828  
74774061  
128200720  
50911182  
6738732  
45431413  
159081094  
46344569

3977531  
86184442  
44585591  
63836680  
1961886  
47465957  
170435428  
7836123  
45956069  
57283974  
36586176  
84872049  
77204766  
54972399  
11788413  
79375358  
21630582  
10064649  
75621019  
25691215  
33267160  
70604210  
17656840  
13430489  
228491298  
34711337  
218683368  
34961674  
8219261  
75861886  
91775504  
725432  
241814190  
66733266  
101380931  
156189625  
16504929  
168474308  
114807236  
4894131  
49499100  
112505108  
5075224

36072573  
47828187  
1487836  
68787529  
113300246  
100684925  
60728953  
124266500  
129534618  
31789710  
274107  
46917064  
35568760  
100043086  
90425672  
105349687  
1027526  
121164388  
119574608  
3102441  
11566772  
111149356  
107811682  
159789608  
26989326  
32403722  
57544713  
64621469  
56947979  
100402814  
83338891  
24014551  
6107231  
45386749  
203698626  
47147437  
159846583  
166147711  
2318693  
2172707  
4154830  
74009153  
14327296



141000152  
66998856  
39779740  
28522401  
21361300  
135813647  
7405073  
51750151  
104398975  
247582755  
72015970  
16561939  
140233651  
98035448  
44023437  
3190756  
15963671  
156293490  
100750835  
50105239  
372156  
165781535  
40314967  
7180909  
427782  
73982269  
103595564  
37699289  
4435161  
51250433  
49391403  
1485478  
102008252  
111144026  
71118582  
61695692  
167535541  
50160519  
30950999  
122471367  
11094202  
48603733  
146387464

21871934  
7240874  
60004440  
74529509  
205549384  
66789157  
77943616  
43017917  
39013521  
139301958  
238947612  
33697759  
140233651  
43165015  
3614382  
153648928  
44780321  
17464584  
151527035  
79134665  
47589706  
44555862  
6449945  
101106210  
151082456  
92005136  
140559639  
45919499  
65659467  
84256410  
49701981  
27734043  
131327896  
48844977  
36755667  
664322  
56403735  
68516247  
160102738  
104500059  
116327352  
36333169  
5741195

75611354  
9750880  
91715819  
206551978  
136131436  
1104733  
25825573  
130608855  
140233651  
240698258  
68733892  
1100693  
43864935  
44166374  
133515554  
150423967  
1530015  
70792406  
79261346  
32741484  
49903708  
25630065  
88920677  
171793585  
3533273  
140233651  
2937629  
39631463  
103395851  
7671606  
53218181  
20005511  
91609462  
144461039  
169814362  
80508538  
3413808  
45618958  
169977893  
76762264  
25399473  
105480533  
55453099

32485154  
64108151  
19583733  
47074257  
55054211  
180540908  
30510532  
117883900  
93567990  
3976548  
211539635  
36116108  
127319559  
43628203  
61559786  
161244769  
145687183  
5936612  
46892956  
3750867  
73595712  
132187312  
12655890  
133736236  
43598340  
1114171  
44856096  
179004274  
90514679  
1244109  
59992426  
179145862  
39624043  
153033730  
4223453  
23155335  
27737179  
128587817  
42220489  
37842088  
93401811  
11139358  
4984168

50960252  
102008252  
110862685  
46839894  
18543949  
17290868  
36181446  
3250576  
74646222  
54671147  
73669147  
27421654  
35890230  
52104669  
18122221  
11074428  
109973837  
112899507  
83977812  
130638028  
79562574  
61615095  
888631  
20361078  
108011590  
16873734  
2971515  
50280105  
5744912  
163768  
49669421  
40518778  
126682467  
44596205  
16730654  
109325478  
56170281  
51051276  
17725632  
52985695  
47013500  
68932568  
88703316

168419593  
79701971  
1574811  
133378706  
22069818  
123409473  
74619602  
25064191  
6681743  
150881874  
22749343  
120190952  
56736652  
6592474  
19004173  
156105927  
58112487  
1791956  
57599401  
10798255  
115184729  
87267293  
74138386  
20116177  
43021166  
138646497  
30955122  
113702376  
55106771  
30111409  
60598912  
3465338  
69604436  
29485475  
190675953  
105081884  
31884043  
82429891  
130171977  
29457371  
71580834  
65415951  
46195925

1014999  
15079582  
21305941  
194077617  
50726410  
14200242  
21770371  
24743734  
97600626  
102815041  
77879657  
42827672  
18706350  
174423979  
176484225  
18795558  
48339985  
55856850  
29780291  
49022855  
45945400  
31128568  
987588  
158319418  
2428094  
14594740  
121623353  
40060205  
46718264  
19959365  
148864851  
178331204  
50037886  
3143781  
10481532  
39737866  
99373556  
40238931  
140160085  
178659605  
54424862  
68532820  
85812638

62037583  
14099081  
33986662  
54674445  
58227117  
31302287  
61825764  
171846842  
191150856  
44515804  
143957579  
26420640  
4715437  
97129897  
131245620  
24155527  
164907051  
134397624  
4028690  
51310012  
80043335  
44373190  
78971536  
43980918  
134275151  
147064183  
102591363  
6471896  
153176005  
24839165  
76840405  
8789358  
102451981  
146068321  
64774314  
167710436  
140233651  
119689587  
62752894  
144449706  
100518917  
86789842  
1320118



3117519  
56099114  
120433500  
7222875  
31089939  
39835886  
128073095  
34888733  
14808428  
94821205  
50531188  
28668377  
1538262  
6600139  
2948452  
1898937  
84442915  
69011119  
11737881  
15263009  
31136618  
40818281  
34466126  
121974717  
12015766  
102264434  
3234979  
222873966  
78969375  
138586239  
29270640  
86212504  
11592359  
6311352  
70837080  
107459731  
47678291  
24983263  
4267803  
240756231  
122431336  
24507010  
104089420

20832165  
98259396  
242815320  
105513371  
1840776  
547559  
12777971  
140661032  
51513353  
49493944  
18054691  
73012786  
31149132  
8367708  
5841557  
50894847  
8931148  
85996834  
122249609  
15164589  
57889227  
185528075  
55703497  
40992887  
1397814  
4622638  
161500455  
4043240  
62657666  
119594662  
134168808  
72274783  
26578979  
76186886  
36353936  
135679280  
56372979  
86547385  
43263356  
33936336  
126320737  
42568439  
44305058

185037323  
140233651  
57274149  
112991312  
9465495  
62243646  
156189625  
38265536  
90107402  
175862629  
220411703  
17320668  
27062535  
58014796  
89968426  
23742538  
19771100  
3905135  
21768475  
42969129  
5036702  
31372187  
63543646  
47380657  
11988839  
46511614  
4453998  
30899353  
32527610  
246278082  
18679739  
5637193  
111926896  
129280064  
96580857  
27853036  
56845938  
169814362  
33168604  
4888314  
31503149  
5733915  
4945917

72436305  
10572060  
43923161  
119533732  
133593565  
47259292  
27128732  
97647163  
139241534  
67770249  
148946472  
18935986  
85517291  
155323907  
41928285  
242584161  
87938910  
56089440  
242252838  
18008674  
102998228  
26491972  
24983263  
66613524  
59803822  
37313663  
44421784  
78369200  
131663705  
103403228  
114665653  
121301342  
1712978  
78357293  
57552264  
156367299  
42936457  
11880998  
145509615  
29249705  
11549241  
77942603  
127048907

53534199  
6062988  
6903189  
89067474  
29639786  
206911227  
86995791  
50429121  
131638085  
91024464  
502552  
100596522  
13679214  
10079896  
40287102  
111763399  
113265722  
102733210  
34101235  
70988896  
15722674  
30503727  
128828168  
88871361  
71290557  
50909404  
2160494  
6645357  
180897569  
10280165  
51169853  
2206970  
143207127  
19485585  
131808288  
1649416  
38616757  
22499723  
167514351  
88326877  
194324731  
1424563  
113705141

99359664  
1287250  
123982970  
13695712  
86267676  
59810619  
28063222  
20704562  
12924035  
91177971  
95761949  
33128890  
140401459  
47013500  
70526843  
86280873  
65239877  
43318993  
9323909  
315320  
226076598  
107745702  
120150195  
31724358  
77708969  
105923990  
97036140  
25479514  
56155967  
21183608  
42552831  
200863771  
21082931  
47653645  
29254749  
89897387  
15725580  
6395454  
2000129  
10102490  
1641550  
64681140  
11264485

4106009  
11611732  
33096643  
170861528  
2214430  
57925285  
3782942  
126481921  
25158222  
7223662  
146659900  
17958772  
68932568  
17518541  
56385579  
16455051  
90107402  
99715657  
27802755  
6658769  
36760589  
129827032  
25062376  
31660000  
44615001  
1289071  
2593661  
77736450  
74879862  
6442324  
15093266  
88619806  
39411407  
27867706  
94003834  
32603677  
19660981  
128048976  
20831245  
121088884  
19025380  
49056569  
88779323

242149010  
18183527  
43493133  
35260502  
177853  
27702774  
42936457  
6917017  
74712951  
195925355  
24542436  
220401322  
147114306  
122725870  
86756664  
5427651  
99112078  
11179484  
29503557  
104061260  
59064635  
214781685  
57249091  
10554358  
101349172  
23546609  
115444798  
10524329  
55917965  
247126920  
120032521  
91717962  
92282792  
55869568  
1264941  
171536969  
8875318  
137337215  
20111266  
9783687  
183363989  
50211918  
73767858



15258423  
1492198  
109839674  
183260073  
195955761  
56183047  
85681868  
65179435  
10577843  
3013017  
31533965  
32831129  
23915129  
45421742  
4836461  
146389500  
69234371  
19916706  
115604657  
36329937  
225394812  
20319385  
19004173  
7480362  
25054889  
152225031  
95965927  
135236807  
1580301  
130880126  
77084652  
31121792  
32647982  
32046943  
2716530  
10655592  
154302293  
4833580  
14305370  
145525404  
102582444  
4636274  
1942860

73427047  
43707726  
41448208  
57872957  
8379486  
69849224  
96444893  
12188481  
37059349  
26948220  
18934349  
68084227  
35502532  
41050290  
28893838  
146030084  
42073397  
162870234  
60816889  
15347782  
3128415  
40260053  
107417280  
186077900  
14506631  
31261857  
97622919  
121603170  
16126820  
114432861  
212566718  
153047088  
91428778  
100026843  
5994158  
46008086  
81050220  
234394486  
17839688  
110343617  
83783720  
68831858  
48381457

82152238  
237126235  
219674490  
77767075  
9426363  
2696910  
32909180  
91762260  
19558246  
4804152  
3534890  
2798848  
6167942  
171675123  
78516538  
201475722  
25516861  
4804152  
67089494  
41984584  
27416887  
42990074  
42473603  
77906701  
46700057  
61562922  
89498970  
16794914  
125854390  
30747191  
149795690  
83246130  
71658641  
9480685  
130529475  
1943118  
31991266  
44039847  
67854284  
33494728  
122350966  
194888044  
16161030

43185498  
76990688  
156704106  
961894  
158857015  
2743980  
131590069  
136017794  
65979455  
79959659  
25853367  
60192106  
50987481  
129379371  
37297602  
4892380  
17453738  
74009153  
136574972  
74529576  
235714041  
66473141  
7300603  
35386509  
230552095  
85965696  
56469861  
116918686  
140233651  
236754256  
38825551  
109246160  
46781832  
81928153  
55965167  
56560534  
39428918  
183493990  
75372848  
101771265  
130313341  
151615685  
91612882

124399154  
68454160  
241387018  
23740141  
204828056  
243649329  
17725744  
4844906  
134203177  
47691729  
106938632  
121661688  
118616249  
35570306  
16698090  
90425672  
90001561  
226057689  
10660427  
43620020  
123863938  
140233651  
75558120  
89656043  
4287197  
114449970  
125154676  
42232916  
35843322  
73719984  
2763627  
5175313  
39122117  
185311568  
4854735  
8586839  
22527642  
73650292  
115569591  
136083939  
129738644  
151998404  
37578578

65269045  
216559655  
68698168  
48645334  
53013356  
142721761  
180043387  
1130889  
4165347  
99912060  
30470360  
6833227  
54424862  
20749914  
89800057  
462994  
46337043  
32528150  
49188262  
39178374  
68696638  
126453648  
145171262  
19636791  
65867128  
54106545  
71749469  
132970927  
45807905  
160391929  
19612277  
42574830  
125920596  
32180470  
123046829  
74712951  
8981896  
711711  
43296117  
180013583  
1590438  
89021640  
70397475

22927469  
119846720  
100262556  
56614533  
169652497  
52910431  
66099987  
53188735  
134474148  
118382105  
78622494  
65063262  
99159017  
34783506  
179642  
5683494  
74743791  
187009441  
58711469  
44259982  
21324610  
45785484  
2279035  
63005076  
62564125  
65358898  
101924537  
23517172  
162896152  
50425838  
141846292  
30955476  
7663229  
102277204  
83338891  
44555862  
8959545  
105162256  
75185899  
55062871  
11006702  
200083183  
128828168

130434201  
22943371  
57274149  
54768053  
68565904  
26440941  
33097876  
1887530  
53298797  
132643215  
49897385  
73563656  
159893282  
26924516  
13113482  
17899267  
49365211  
52086350  
43923161  
53665648  
57080660  
141569176  
1219701  
129111284  
71569684  
1946872  
31846535  
70444447  
27452084  
78233344  
69205759  
147179769  
50028589  
101096562  
74757139  
72949435  
73635178  
70321681  
116646991  
148807225  
74723439  
25803230  
116634422



26405589  
44555862  
71779902  
45543675  
6869494  
140233651  
31128568  
126290561  
22570064  
154416933  
42839033  
17388922  
72776119  
20641660

3277128,138277131,138277156,138277167,138277332,138277338,138277341,13828!  
246016,1252217,1252231,1252243,1254312,1254316,1254335,1261455  
7650299,157700218,157799746,157933157,158109457,158240236,158240238,15824!  
5622218,105622238,105622243,105622249,105622272,105622280  
J278361,140283070,140283094,140297563,140299447,140301195  
.0454333,60454374,60512936  
279800,3321018  
5341805,135341909,135342334

7987647

1433341



























































































5328,138285344,138285521,138285529

0243,158240257

| <b>Gene name</b> | <b>number of high covaria</b> | <b>chromosome</b> |
|------------------|-------------------------------|-------------------|
| ANTXR2           | 15                            | chr4              |
| LOC441666        | 12                            | chr10             |
| PTPRN2           | 11                            | chr7              |
| CUX1             | 10                            | chr7              |
| RPL23AP53        | 10                            | chr8              |
| FGF13            | 9                             | chrX              |
| CBFA2T3          | 7                             | chr16             |
| CDH4             | 7                             | chr20             |
| MACROD2          | 7                             | chr20             |
| COL23A1          | 7                             | chr5              |
| JAG2             | 6                             | chr14             |
| LARGE            | 6                             | chr22             |
| TMEM240          | 6                             | chr1              |
| ONECUT2          | 6                             | chr18             |
| LOC286467        | 6                             | chrX              |
| NFATC1           | 6                             | chr18             |
| CBFA2T3          | 6                             | chr16             |
| DPP6             | 5                             | chr7              |
| NFATC1           | 5                             | chr18             |
| SEC14L5          | 5                             | chr16             |
| CSMD1            | 5                             | chr8              |
| DAGLA            | 5                             | chr11             |
| RPTOR            | 5                             | chr17             |
| HSPA7            | 4                             | chr1              |
| LARP1B           | 4                             | chr4              |
| MORN1            | 4                             | chr1              |
| LAMA5            | 4                             | chr20             |
| HDAC4            | 4                             | chr2              |
| CTBP1            | 4                             | chr4              |
| FLJ12825         | 4                             | chr12             |
| TBCD             | 4                             | chr17             |
| COLEC11          | 4                             | chr2              |
| CEP112           | 4                             | chr17             |
| MAGIX            | 4                             | chrX              |
| N4BP3            | 4                             | chr5              |
| PCSK6            | 4                             | chr15             |
| DMD              | 4                             | chrX              |
| PRKCZ            | 4                             | chr1              |
| AHRR             | 4                             | chr5              |
| MLLT1            | 4                             | chr19             |
| ADAMTS17         | 4                             | chr15             |
| SLC36A1          | 4                             | chr5              |
| TSPAN9           | 4                             | chr12             |
| NPR3             | 4                             | chr5              |
| D2HGDH           | 4                             | chr2              |

|           |   |       |
|-----------|---|-------|
| CDH4      | 4 | chr20 |
| CAMTA1    | 4 | chr1  |
| KIF26B    | 4 | chr1  |
| DPP6      | 4 | chr7  |
| RPRD2     | 4 | chr1  |
| UGT1A8    | 3 | chr2  |
| DNAH17    | 3 | chr17 |
| SYNPR     | 3 | chr3  |
| DMD       | 3 | chrX  |
| UGT1A4    | 3 | chr2  |
| MOB2      | 3 | chr11 |
| AGAP1     | 3 | chr2  |
| UGT1A6    | 3 | chr2  |
| PARK2     | 3 | chr6  |
| ZNF282    | 3 | chr7  |
| SYNGR1    | 3 | chr22 |
| C1QL3     | 3 | chr10 |
| ANO2      | 3 | chr12 |
| CACNA1H   | 3 | chr16 |
| DYSF      | 3 | chr2  |
| SBNO2     | 3 | chr19 |
| CNOT1     | 3 | chr16 |
| DOT1L     | 3 | chr19 |
| DLGAP2    | 3 | chr8  |
| UGT1A5    | 3 | chr2  |
| CNTNAP2   | 3 | chr7  |
| CLYBL     | 3 | chr13 |
| SMOC2     | 3 | chr6  |
| MACROD2   | 3 | chr20 |
| NRCAM     | 3 | chr7  |
| UGT1A10   | 3 | chr2  |
| COL6A2    | 3 | chr21 |
| RBFOX1    | 3 | chr16 |
| ATP8B4    | 3 | chr15 |
| CTBP2     | 3 | chr10 |
| TNFRSF19  | 3 | chr13 |
| PCSK6     | 3 | chr15 |
| MMP17     | 3 | chr12 |
| LOC339166 | 3 | chr17 |
| SHANK2    | 3 | chr11 |
| PKP4      | 3 | chr2  |
| PIEZO1    | 3 | chr16 |
| UGT1A9    | 3 | chr2  |
| PGS1      | 3 | chr17 |
| C14orf159 | 3 | chr14 |
| ATP9B     | 3 | chr18 |

|                |   |       |
|----------------|---|-------|
| AP3M1          | 3 | chr10 |
| CTSD           | 3 | chr11 |
| SH2D4B         | 3 | chr10 |
| RYR3           | 3 | chr15 |
| MMEL1          | 3 | chr1  |
| ZSCAN1         | 3 | chr19 |
| FZR1           | 3 | chr19 |
| DOK6           | 3 | chr18 |
| WDSUB1         | 3 | chr2  |
| FAM213B        | 3 | chr1  |
| MIR548F5       | 3 | chr13 |
| WDR86          | 3 | chr7  |
| GPR133         | 3 | chr12 |
| TAF1C          | 3 | chr16 |
| ZNF664-FAM101A | 3 | chr12 |
| PRR5-ARHGAP8   | 3 | chr22 |
| TMEM132C       | 3 | chr12 |
| FAM53A         | 3 | chr4  |
| UGT1A7         | 3 | chr2  |
| RAB36          | 3 | chr22 |
| FLG            | 3 | chr1  |
| FRMD1          | 3 | chr6  |
| CAMK1D         | 3 | chr10 |
| BCYRN1         | 3 | chrX  |
| NAALADL2       | 3 | chr3  |
| PLEKHG1        | 3 | chr6  |
| NBEA           | 3 | chr13 |
| KCND3          | 3 | chr1  |
| NOTCH1         | 2 | chr9  |
| CHST8          | 2 | chr19 |
| GPC5           | 2 | chr13 |
| PVRL1          | 2 | chr11 |
| PCDHA1         | 2 | chr5  |
| PHKA2          | 2 | chrX  |
| PIK3C2B        | 2 | chr1  |
| RAB40C         | 2 | chr16 |
| MRPL28         | 2 | chr16 |
| ABCC5          | 2 | chr3  |
| LRRC20         | 2 | chr10 |
| RGS12          | 2 | chr4  |
| ROBO1          | 2 | chr3  |
| DNMT1          | 2 | chr19 |
| CYP11B1        | 2 | chr8  |
| TIAM1          | 2 | chr21 |
| PEAR1          | 2 | chr1  |
| PRR5           | 2 | chr22 |

|               |   |       |
|---------------|---|-------|
| FAM19A5       | 2 | chr22 |
| ANKRD24       | 2 | chr19 |
| SLC12A5       | 2 | chr20 |
| FAM178B       | 2 | chr2  |
| TPCN2         | 2 | chr11 |
| WDR4          | 2 | chr21 |
| TRAPPC9       | 2 | chr8  |
| FAM20C        | 2 | chr7  |
| SNX8          | 2 | chr7  |
| MYOM2         | 2 | chr8  |
| PCDHA3        | 2 | chr5  |
| AP3D1         | 2 | chr19 |
| ATP11A        | 2 | chr13 |
| STON1-GTF2A1L | 2 | chr2  |
| LINC00200     | 2 | chr10 |
| TTC40         | 2 | chr10 |
| GABRA5        | 2 | chr15 |
| KCNQ1         | 2 | chr11 |
| LOC100132273  | 2 | chr22 |
| CLEC17A       | 2 | chr19 |
| SYNPO2        | 2 | chr4  |
| HSH2D         | 2 | chr19 |
| SYT14         | 2 | chr1  |
| ENOSF1        | 2 | chr18 |
| ZIC1          | 2 | chr3  |
| LRP1B         | 2 | chr2  |
| MIR548AO      | 2 | chr5  |
| BRD1          | 2 | chr22 |
| HHAT          | 2 | chr1  |
| DLEU7-AS1     | 2 | chr13 |
| FAM47B        | 2 | chrX  |
| ULK4          | 2 | chr3  |
| RASA3         | 2 | chr13 |
| PCDH19        | 2 | chrX  |
| FAM83A        | 2 | chr8  |
| TMED10        | 2 | chr14 |
| PDSS1         | 2 | chr10 |
| FIBCD1        | 2 | chr9  |
| STMN3         | 2 | chr20 |
| 9-Sep         | 2 | chr17 |
| SIPA1L3       | 2 | chr19 |
| CNTNAP5       | 2 | chr2  |
| PRKAG2        | 2 | chr7  |
| PNKD          | 2 | chr2  |
| NXN           | 2 | chr17 |
| EIF4G3        | 2 | chr1  |

|              |   |       |
|--------------|---|-------|
| STK40        | 2 | chr1  |
| ADAMTSL3     | 2 | chr15 |
| COTL1        | 2 | chr16 |
| DSCAML1      | 2 | chr11 |
| FBXL20       | 2 | chr17 |
| PARD6G       | 2 | chr18 |
| BAIAP2       | 2 | chr17 |
| SYT2         | 2 | chr1  |
| SORCS2       | 2 | chr4  |
| KANSL1       | 2 | chr17 |
| FRMD1        | 2 | chr6  |
| KCNAB2       | 2 | chr1  |
| TMEM184A     | 2 | chr7  |
| C1orf94      | 2 | chr1  |
| PQLC1        | 2 | chr18 |
| LHX6         | 2 | chr9  |
| MYO9B        | 2 | chr19 |
| RYR2         | 2 | chr1  |
| MCF2L        | 2 | chr13 |
| CACNA1B      | 2 | chr9  |
| TXN2         | 2 | chr22 |
| PCNXL2       | 2 | chr1  |
| ARHGEF9      | 2 | chrX  |
| PTPRS        | 2 | chr19 |
| POLR2A       | 2 | chr17 |
| PCDHA8       | 2 | chr5  |
| HNF4A        | 2 | chr20 |
| TMCO3        | 2 | chr13 |
| MKLN1        | 2 | chr7  |
| PCDH9        | 2 | chr13 |
| AGAP1        | 2 | chr2  |
| ADCY3        | 2 | chr2  |
| PCDHA5       | 2 | chr5  |
| OCA2         | 2 | chr15 |
| VPS26A       | 2 | chr10 |
| C2orf83      | 2 | chr2  |
| VDR          | 2 | chr12 |
| RPF2         | 2 | chr6  |
| DNAJB13      | 2 | chr11 |
| NINL         | 2 | chr20 |
| DYSF         | 2 | chr2  |
| YIF1B        | 2 | chr19 |
| LOC100286922 | 2 | chr2  |
| GPC1         | 2 | chr2  |
| UNC79        | 2 | chr14 |
| FOXK2        | 2 | chr17 |



|                |   |       |
|----------------|---|-------|
| PXDNL          | 2 | chr8  |
| C1orf159       | 2 | chr1  |
| CELF4          | 2 | chr18 |
| COL18A1        | 2 | chr21 |
| CNOT1          | 2 | chr16 |
| SLITRK4        | 2 | chrX  |
| C20orf85       | 2 | chr20 |
| NOV            | 2 | chr8  |
| TMPRSS15       | 2 | chr21 |
| DOCK1          | 2 | chr10 |
| IL1RAP         | 2 | chr3  |
| STIM1          | 2 | chr11 |
| PGBD5          | 2 | chr1  |
| SLC12A7        | 2 | chr5  |
| ADARB2         | 2 | chr10 |
| KCNQ2          | 2 | chr20 |
| CACNA1G        | 2 | chr17 |
| LINC00616      | 2 | chr4  |
| TYW1           | 2 | chr7  |
| GPR132         | 2 | chr14 |
| PCDHA7         | 2 | chr5  |
| ASAP1          | 2 | chr8  |
| HAUS7          | 2 | chrX  |
| PTCHD2         | 2 | chr1  |
| ZFHX4          | 2 | chr8  |
| NLRP2          | 2 | chr19 |
| SYNGR3         | 2 | chr16 |
| KCNK17         | 2 | chr6  |
| TTLL10         | 2 | chr1  |
| ARHGAP19-SLIT1 | 2 | chr10 |
| UGT1A3         | 2 | chr2  |
| ANO1           | 2 | chr11 |
| ZNF483         | 2 | chr9  |
| MRPL45P2       | 2 | chr17 |
| TSNARE1        | 2 | chr8  |
| MYRF           | 2 | chr11 |
| POR            | 2 | chr7  |
| ATG4B          | 2 | chr2  |
| PCSK6          | 2 | chr15 |
| ERICH1-AS1     | 2 | chr8  |
| INPP5A         | 2 | chr10 |
| GAS7           | 2 | chr17 |
| DIAPH2         | 2 | chrX  |
| CDH13          | 2 | chr16 |
| WDR5           | 2 | chr9  |
| ZIC3           | 2 | chrX  |

|            |   |       |
|------------|---|-------|
| ZFP42      | 2 | chr4  |
| ATAD3C     | 2 | chr1  |
| CTBP1-AS1  | 2 | chr4  |
| CELSR1     | 2 | chr22 |
| MYO7B      | 2 | chr2  |
| SENP5      | 2 | chr3  |
| MDGA2      | 2 | chr14 |
| PCDHA4     | 2 | chr5  |
| B4GALT1    | 2 | chr9  |
| ZDHHC19    | 2 | chr3  |
| LMF1       | 2 | chr16 |
| GABRB3     | 2 | chr15 |
| TRPM7      | 2 | chr15 |
| DLEU7      | 2 | chr13 |
| RTL1       | 2 | chr14 |
| RYR1       | 2 | chr19 |
| GAK        | 2 | chr4  |
| MMP25      | 2 | chr16 |
| SORCS1     | 2 | chr10 |
| GALNTL6    | 2 | chr4  |
| ANP32E     | 2 | chr1  |
| C7orf50    | 2 | chr7  |
| LINC00673  | 2 | chr17 |
| TRPM2      | 2 | chr21 |
| FTSJ1      | 2 | chrX  |
| TPST2      | 2 | chr22 |
| WDR37      | 2 | chr10 |
| FAM32A     | 2 | chr19 |
| FLI1       | 2 | chr11 |
| DIP2C      | 2 | chr10 |
| KDM4B      | 2 | chr19 |
| KIAA1967   | 2 | chr8  |
| SORBS2     | 2 | chr4  |
| PCDHA6     | 2 | chr5  |
| IL32       | 2 | chr16 |
| YWHAE      | 2 | chr17 |
| SH3PXD2A   | 2 | chr10 |
| PARD6G-AS1 | 2 | chr18 |
| TNC        | 2 | chr9  |
| SPPL2B     | 2 | chr19 |
| ARHGAP19   | 2 | chr10 |
| PRDM16     | 2 | chr1  |
| FANCC      | 2 | chr9  |
| ADAMTS2    | 2 | chr5  |
| PCDHA2     | 2 | chr5  |
| RIMBP2     | 2 | chr12 |

|              |   |       |
|--------------|---|-------|
| DHX37        | 2 | chr12 |
| QSOX2        | 2 | chr9  |
| DCHS2        | 2 | chr4  |
| LRRTM4       | 2 | chr2  |
| KIF1A        | 2 | chr2  |
| AES          | 2 | chr19 |
| ASPSCR1      | 2 | chr17 |
| APBA2        | 1 | chr15 |
| CTNND1       | 1 | chr11 |
| PRKX         | 1 | chrX  |
| ART3         | 1 | chr4  |
| GRAMD1A      | 1 | chr19 |
| SPTBN4       | 1 | chr19 |
| SNRPN        | 1 | chr15 |
| TBC1D30      | 1 | chr12 |
| TACC2        | 1 | chr10 |
| PTPRH        | 1 | chr19 |
| PSME3        | 1 | chr17 |
| RPS6KB1      | 1 | chr17 |
| ARRB2        | 1 | chr17 |
| NUGGC        | 1 | chr8  |
| GALNS        | 1 | chr16 |
| NOB1         | 1 | chr16 |
| BCL2         | 1 | chr18 |
| SH3BP5       | 1 | chr3  |
| LOC100873065 | 1 | chrX  |
| GLT1D1       | 1 | chr12 |
| CLSTN2       | 1 | chr3  |
| CCT5         | 1 | chr5  |
| PDE6B        | 1 | chr4  |
| UBAC1        | 1 | chr9  |
| MTRF1L       | 1 | chr6  |
| C20orf196    | 1 | chr20 |
| DGKG         | 1 | chr3  |
| KIAA1609     | 1 | chr16 |
| FRY          | 1 | chr13 |
| CD97         | 1 | chr19 |
| SFTA3        | 1 | chr14 |
| PRIMA1       | 1 | chr14 |
| SLC22A18     | 1 | chr11 |
| CNTN1        | 1 | chr12 |
| RHPN1-AS1    | 1 | chr8  |
| KCNJ15       | 1 | chr21 |
| ATP8A2       | 1 | chr13 |
| TMEM8C       | 1 | chr9  |
| TAF2         | 1 | chr8  |

|              |   |       |
|--------------|---|-------|
| FAM83E       | 1 | chr19 |
| GRB10        | 1 | chr7  |
| MYH7         | 1 | chr14 |
| CNN2         | 1 | chr19 |
| RPS6KA2      | 1 | chr6  |
| ZNF611       | 1 | chr19 |
| PLXNB3       | 1 | chrX  |
| HEATR2       | 1 | chr7  |
| LINC00461    | 1 | chr5  |
| HTR6         | 1 | chr1  |
| MACROD1      | 1 | chr11 |
| THBS2        | 1 | chr6  |
| ITPR3        | 1 | chr6  |
| GAS6         | 1 | chr13 |
| SLC6A18      | 1 | chr5  |
| PLEKHA6      | 1 | chr1  |
| PARD6B       | 1 | chr20 |
| RHPN1        | 1 | chr8  |
| RTDR1        | 1 | chr22 |
| KRT72        | 1 | chr12 |
| BAIAP3       | 1 | chr16 |
| IQCG         | 1 | chr3  |
| STOX2        | 1 | chr4  |
| DNMT3A       | 1 | chr2  |
| PRKAG2       | 1 | chr7  |
| CCDC146      | 1 | chr7  |
| PRKAR1B      | 1 | chr7  |
| AJAP1        | 1 | chr1  |
| CCDC178      | 1 | chr18 |
| DIS3L2       | 1 | chr2  |
| ZNF213       | 1 | chr16 |
| PI4K2B       | 1 | chr4  |
| WBP2NL       | 1 | chr22 |
| LDLRAD3      | 1 | chr11 |
| CMTM5        | 1 | chr14 |
| MAP3K4       | 1 | chr6  |
| MLL3         | 1 | chr7  |
| RAP1GAP2     | 1 | chr17 |
| BCOR         | 1 | chrX  |
| FLVCR1       | 1 | chr1  |
| OCLN         | 1 | chr5  |
| ALPL         | 1 | chr1  |
| TUB          | 1 | chr11 |
| MYO1F        | 1 | chr19 |
| NLRC4        | 1 | chr2  |
| LOC100507373 | 1 | chr19 |

|               |   |       |
|---------------|---|-------|
| PXDN          | 1 | chr2  |
| BIN3          | 1 | chr8  |
| STX16-NPEPL1  | 1 | chr20 |
| NT5C3         | 1 | chr7  |
| MROH5         | 1 | chr8  |
| BOC           | 1 | chr3  |
| PPFIA2        | 1 | chr12 |
| RNF26         | 1 | chr11 |
| FGGY          | 1 | chr1  |
| CEP170B       | 1 | chr14 |
| ZNF516        | 1 | chr18 |
| PMF1-BGLAP    | 1 | chr1  |
| TRPC5         | 1 | chrX  |
| CDK16         | 1 | chrX  |
| SLC2A5        | 1 | chr1  |
| PML           | 1 | chr15 |
| GIGYF2        | 1 | chr2  |
| GRAMD4        | 1 | chr22 |
| DTNBP1        | 1 | chr6  |
| SEMA5A        | 1 | chr5  |
| PPIL6         | 1 | chr6  |
| ST3GAL1       | 1 | chr8  |
| NOVA1         | 1 | chr14 |
| TSHZ1         | 1 | chr18 |
| PKD1L2        | 1 | chr16 |
| GFRA1         | 1 | chr10 |
| KBTBD2        | 1 | chr7  |
| PREX1         | 1 | chr20 |
| THOP1         | 1 | chr19 |
| CDH18         | 1 | chr5  |
| LINGO2        | 1 | chr9  |
| NCAM2         | 1 | chr21 |
| MICAL3        | 1 | chr22 |
| TLL2          | 1 | chr10 |
| IL12RB1       | 1 | chr19 |
| FBXL17        | 1 | chr5  |
| SERHL2        | 1 | chr22 |
| FSTL3         | 1 | chr19 |
| ANKRD33B      | 1 | chr5  |
| KAZN          | 1 | chr1  |
| LOC728431     | 1 | chr1  |
| ZSWIM4        | 1 | chr19 |
| DKFZp686O1327 | 1 | chr2  |
| LINC00617     | 1 | chr14 |
| RHOBTB3       | 1 | chr5  |
| ASIC2         | 1 | chr17 |

|                |   |       |
|----------------|---|-------|
| CALN1          | 1 | chr7  |
| AVPR1A         | 1 | chr12 |
| MYO15B         | 1 | chr17 |
| SYT1           | 1 | chr12 |
| HSPB2-C11orf52 | 1 | chr11 |
| DNAJC15        | 1 | chr13 |
| ATP10A         | 1 | chr15 |
| DKK3           | 1 | chr11 |
| CCDC61         | 1 | chr19 |
| HELB           | 1 | chr12 |
| PGP            | 1 | chr16 |
| DDX3X          | 1 | chrX  |
| ARL2-SNX15     | 1 | chr11 |
| LDLRAD4        | 1 | chr18 |
| NTN1           | 1 | chr17 |
| WNT3           | 1 | chr17 |
| MROH1          | 1 | chr8  |
| AOX1           | 1 | chr2  |
| SPAG16         | 1 | chr2  |
| HAGHL          | 1 | chr16 |
| TCEAL2         | 1 | chrX  |
| ZNF524         | 1 | chr19 |
| BMPR1B         | 1 | chr4  |
| CUL3           | 1 | chr2  |
| RAB35          | 1 | chr12 |
| LRP12          | 1 | chr8  |
| LRRC38         | 1 | chr1  |
| INTS1          | 1 | chr7  |
| ATP9A          | 1 | chr20 |
| KIAA1211       | 1 | chr4  |
| UGGT2          | 1 | chr13 |
| POLDIP3        | 1 | chr22 |
| PRKAG3         | 1 | chr2  |
| GUSBP11        | 1 | chr22 |
| CANX           | 1 | chr5  |
| PPP4R1L        | 1 | chr20 |
| SMIM14         | 1 | chr4  |
| POFUT2         | 1 | chr21 |
| ACE            | 1 | chr17 |
| TMBIM1         | 1 | chr2  |
| SELM           | 1 | chr22 |
| RNGTT          | 1 | chr6  |
| TMEM45B        | 1 | chr11 |
| DEAF1          | 1 | chr11 |
| UHRF1          | 1 | chr19 |
| PCDHA8         | 1 | chr5  |

|               |   |       |
|---------------|---|-------|
| GALNT9        | 1 | chr12 |
| CHMP5         | 1 | chr9  |
| EXOC6B        | 1 | chr2  |
| LOC653712     | 1 | chr3  |
| SRCAP         | 1 | chr16 |
| SORBS2        | 1 | chr4  |
| CORO2B        | 1 | chr15 |
| C1QTNF2       | 1 | chr5  |
| FLJ46257      | 1 | chr22 |
| TMEM41B       | 1 | chr11 |
| C1orf151-NBL1 | 1 | chr1  |
| ZC3H12D       | 1 | chr6  |
| URGCP         | 1 | chr7  |
| RABGAP1L      | 1 | chr1  |
| FADS2         | 1 | chr11 |
| DPYSL2        | 1 | chr8  |
| NR1I2         | 1 | chr3  |
| MMD2          | 1 | chr7  |
| ABL1          | 1 | chr9  |
| MAGI1         | 1 | chr3  |
| KCNQ3         | 1 | chr8  |
| BRSK2         | 1 | chr11 |
| PPIL4         | 1 | chr6  |
| DPYSL5        | 1 | chr2  |
| ALX4          | 1 | chr11 |
| ENPP7         | 1 | chr17 |
| NLRP5         | 1 | chr19 |
| GABBR2        | 1 | chr9  |
| GATA6         | 1 | chr18 |
| KCTD17        | 1 | chr22 |
| POP1          | 1 | chr8  |
| CMC1          | 1 | chr3  |
| CTNNA3        | 1 | chr10 |
| C3orf67       | 1 | chr3  |
| ACAP3         | 1 | chr1  |
| CTBP2         | 1 | chr10 |
| MAGEL2        | 1 | chr15 |
| TSHZ2         | 1 | chr20 |
| TRAPPC11      | 1 | chr4  |
| ABCC1         | 1 | chr16 |
| LIN52         | 1 | chr14 |
| GLTSCR1       | 1 | chr19 |
| SKIV2L2       | 1 | chr5  |
| PDZRN3        | 1 | chr3  |
| SLC4A7        | 1 | chr3  |
| NMT1          | 1 | chr17 |

|              |   |       |
|--------------|---|-------|
| LDB2         | 1 | chr4  |
| ARHGAP4      | 1 | chrX  |
| SPTB         | 1 | chr14 |
| SRSF4        | 1 | chr1  |
| GRK1         | 1 | chr13 |
| PDZD2        | 1 | chr5  |
| CNPY1        | 1 | chr7  |
| ABCA13       | 1 | chr7  |
| TULP4        | 1 | chr6  |
| LAMC3        | 1 | chr9  |
| BAZ1A        | 1 | chr14 |
| HRNR         | 1 | chr1  |
| PDS5A        | 1 | chr4  |
| MGMT         | 1 | chr10 |
| KIRREL2      | 1 | chr19 |
| KCNG4        | 1 | chr16 |
| SLC22A23     | 1 | chr6  |
| DAPK3        | 1 | chr19 |
| PLD5         | 1 | chr1  |
| LOC100130155 | 1 | chr8  |
| SEZ6L        | 1 | chr22 |
| CDC42SE2     | 1 | chr5  |
| EPHA3        | 1 | chr3  |
| NRXN3        | 1 | chr14 |
| ERCC8        | 1 | chr5  |
| PLEKHA5      | 1 | chr12 |
| RGS10        | 1 | chr10 |
| ERBB4        | 1 | chr2  |
| TRIM37       | 1 | chr17 |
| ZRANB3       | 1 | chr2  |
| AOAH         | 1 | chr7  |
| DNAJC5G      | 1 | chr2  |
| TERT         | 1 | chr5  |
| GGT1         | 1 | chr22 |
| ATG14        | 1 | chr14 |
| CWF19L2      | 1 | chr11 |
| PIGN         | 1 | chr18 |
| PNLIPRP2     | 1 | chr10 |
| MYO7A        | 1 | chr11 |
| TNK1         | 1 | chr17 |
| ANKRD31      | 1 | chr5  |
| SNX27        | 1 | chr1  |
| WNT9A        | 1 | chr1  |
| BNC2         | 1 | chr9  |
| KHDC1        | 1 | chr6  |
| PIK3R4       | 1 | chr3  |



|              |   |       |
|--------------|---|-------|
| SLC5A4       | 1 | chr22 |
| SOD3         | 1 | chr4  |
| LRRC27       | 1 | chr10 |
| USP37        | 1 | chr2  |
| COL4A4       | 1 | chr2  |
| ATP2B2       | 1 | chr3  |
| MEI1         | 1 | chr22 |
| PM20D1       | 1 | chr1  |
| COL22A1      | 1 | chr8  |
| JRK          | 1 | chr8  |
| PTX4         | 1 | chr16 |
| WWOX         | 1 | chr16 |
| DCUN1D3      | 1 | chr16 |
| WBSCR17      | 1 | chr7  |
| ZMAT4        | 1 | chr8  |
| PLOD1        | 1 | chr1  |
| LOC100133669 | 1 | chr8  |
| MIR548AI     | 1 | chr14 |
| NEBL         | 1 | chr10 |
| ZNF812       | 1 | chr19 |
| MUC6         | 1 | chr11 |
| ATP1A1       | 1 | chr1  |
| TRIM62       | 1 | chr1  |
| CHD1         | 1 | chr5  |
| LRRC4B       | 1 | chr19 |
| NEK6         | 1 | chr9  |
| DDX12P       | 1 | chr12 |
| PARL         | 1 | chr3  |
| ZNF578       | 1 | chr19 |
| FAR1         | 1 | chr11 |
| FAM101A      | 1 | chr12 |
| DGCR2        | 1 | chr22 |
| RGS7         | 1 | chr1  |
| MARS         | 1 | chr12 |
| SIPA1        | 1 | chr11 |
| ZNF280C      | 1 | chrX  |
| ARHGAP25     | 1 | chr2  |
| CDK11B       | 1 | chr1  |
| SLC29A1      | 1 | chr6  |
| MYO18B       | 1 | chr22 |
| MRTO4        | 1 | chr1  |
| KANK1        | 1 | chr9  |
| LONRF3       | 1 | chrX  |
| LHFP         | 1 | chr13 |
| SLC1A7       | 1 | chr1  |
| SVIL         | 1 | chr10 |

|              |   |       |
|--------------|---|-------|
| CD4          | 1 | chr12 |
| HTT          | 1 | chr4  |
| DET1         | 1 | chr15 |
| SDCCAG8      | 1 | chr1  |
| MAFK         | 1 | chr7  |
| ANP32B       | 1 | chr9  |
| SURF6        | 1 | chr9  |
| LOC100128946 | 1 | chr22 |
| EFHA1        | 1 | chr13 |
| CPN2         | 1 | chr3  |
| SLC7A9       | 1 | chr19 |
| GABRD        | 1 | chr1  |
| CRELD2       | 1 | chr22 |
| MGAT4C       | 1 | chr12 |
| KIF26A       | 1 | chr14 |
| SFRP1        | 1 | chr8  |
| CCDC154      | 1 | chr16 |
| DAB1         | 1 | chr1  |
| RBFOX3       | 1 | chr17 |
| MAT1A        | 1 | chr10 |
| GLTSCR1L     | 1 | chr6  |
| YEATS2       | 1 | chr3  |
| 9-Sep        | 1 | chr17 |
| POLR3C       | 1 | chr1  |
| CUL1         | 1 | chr7  |
| DRAM1        | 1 | chr12 |
| ABAT         | 1 | chr16 |
| NRXN1        | 1 | chr2  |
| ROR2         | 1 | chr9  |
| GPR151       | 1 | chr5  |
| KDM4C        | 1 | chr9  |
| SNX29        | 1 | chr16 |
| MADCAM1      | 1 | chr19 |
| PEX6         | 1 | chr6  |
| LINC00840    | 1 | chr10 |
| GCH1         | 1 | chr14 |
| TCEANC       | 1 | chrX  |
| C7orf10      | 1 | chr7  |
| DNAH10       | 1 | chr12 |
| FAM189A2     | 1 | chr9  |
| CLPSL1       | 1 | chr6  |
| CTNNAL1      | 1 | chr9  |
| ZBTB11       | 1 | chr3  |
| HELZ2        | 1 | chr20 |
| GRID2        | 1 | chr4  |
| FXN          | 1 | chr9  |

|                |   |       |
|----------------|---|-------|
| LINC00478      | 1 | chr21 |
| ATP8B3         | 1 | chr19 |
| CD9            | 1 | chr12 |
| HSD17B6        | 1 | chr12 |
| TUSC5          | 1 | chr17 |
| INPP5J         | 1 | chr22 |
| XKR6           | 1 | chr8  |
| TBATA          | 1 | chr10 |
| DAG1           | 1 | chr3  |
| KIAA1217       | 1 | chr10 |
| TGS1           | 1 | chr8  |
| METRNL         | 1 | chr17 |
| MCM3AP         | 1 | chr21 |
| FAM184A        | 1 | chr6  |
| ZFP82          | 1 | chr19 |
| OTX2-AS1       | 1 | chr14 |
| C15orf38-AP3S2 | 1 | chr15 |
| P2RX4          | 1 | chr12 |
| ITGAL          | 1 | chr16 |
| DTNB           | 1 | chr2  |
| MAGI2          | 1 | chr7  |
| ANKFN1         | 1 | chr17 |
| FOXP1          | 1 | chr3  |
| ZNF565         | 1 | chr19 |
| GATA2          | 1 | chr3  |
| ZNF517         | 1 | chr8  |
| HIBCH          | 1 | chr2  |
| TUBB3          | 1 | chr16 |
| FAM187B        | 1 | chr19 |
| PLCB1          | 1 | chr20 |
| INTS2          | 1 | chr17 |
| SLC29A4        | 1 | chr7  |
| HTR2C          | 1 | chrX  |
| MIR548I4       | 1 | chr7  |
| GOLGA8A        | 1 | chr15 |
| AQP1           | 1 | chr7  |
| SCNN1A         | 1 | chr12 |
| NCOR2          | 1 | chr12 |
| LPHN1          | 1 | chr19 |
| ARHGAP8        | 1 | chr22 |
| AKAP13         | 1 | chr15 |
| GRXCR1         | 1 | chr4  |
| ZNF284         | 1 | chr19 |
| MED29          | 1 | chr19 |
| R3HDM4         | 1 | chr19 |
| TRDN           | 1 | chr6  |

|          |   |       |
|----------|---|-------|
| TAF4     | 1 | chr20 |
| FLJ16171 | 1 | chr5  |
| APBB2    | 1 | chr4  |
| CPNE7    | 1 | chr16 |
| CTNNA2   | 1 | chr2  |
| CDR2L    | 1 | chr17 |
| SHD      | 1 | chr19 |
| NCS1     | 1 | chr9  |
| AKR7L    | 1 | chr1  |
| TMEM8A   | 1 | chr16 |
| NRG1     | 1 | chr8  |
| JOSD2    | 1 | chr19 |
| ABCC4    | 1 | chr13 |
| MRC2     | 1 | chr17 |
| PHACTR3  | 1 | chr20 |
| ACTRT2   | 1 | chr1  |
| RER1     | 1 | chr1  |
| NRF1     | 1 | chr7  |
| GMEB2    | 1 | chr20 |
| RBMS3    | 1 | chr3  |
| MCF2L    | 1 | chr13 |
| BTBD2    | 1 | chr19 |
| NSMCE1   | 1 | chr16 |
| DKK4     | 1 | chr8  |
| KALRN    | 1 | chr3  |
| FAT3     | 1 | chr11 |
| RNF128   | 1 | chrX  |
| PDCD6    | 1 | chr5  |
| JAK1     | 1 | chr1  |
| TCF7L1   | 1 | chr2  |
| DCDC2    | 1 | chr6  |
| MAP3K12  | 1 | chr12 |
| CDH2     | 1 | chr18 |
| MCPH1    | 1 | chr8  |
| NUDCD1   | 1 | chr8  |
| SKI      | 1 | chr1  |
| GTF2A1L  | 1 | chr2  |
| SNX11    | 1 | chr17 |
| ZNF890P  | 1 | chr7  |
| CCDC102B | 1 | chr18 |
| OBSCN    | 1 | chr1  |
| ME3      | 1 | chr11 |
| COL25A1  | 1 | chr4  |
| BFSP2    | 1 | chr3  |
| UBE2H    | 1 | chr7  |
| RBKS     | 1 | chr2  |

|              |   |       |
|--------------|---|-------|
| TFDP2        | 1 | chr3  |
| LRRC4C       | 1 | chr11 |
| FAM178B      | 1 | chr2  |
| LRRC15       | 1 | chr3  |
| CCDC88C      | 1 | chr14 |
| PRSS21       | 1 | chr16 |
| GFOD1        | 1 | chr6  |
| PLIN3        | 1 | chr19 |
| GLB1         | 1 | chr3  |
| RADIL        | 1 | chr7  |
| LOC732275    | 1 | chr16 |
| UBR4         | 1 | chr1  |
| IFNAR1       | 1 | chr21 |
| LOC442459    | 1 | chrX  |
| BCKDK        | 1 | chr16 |
| RTN4RL1      | 1 | chr17 |
| SGCZ         | 1 | chr8  |
| SNX14        | 1 | chr6  |
| PTPRM        | 1 | chr18 |
| CCDC113      | 1 | chr16 |
| TSC2         | 1 | chr16 |
| C1QTNF6      | 1 | chr22 |
| CRISPLD2     | 1 | chr16 |
| ZDHHC8P1     | 1 | chr22 |
| CTSH         | 1 | chr15 |
| ZNF7         | 1 | chr8  |
| RIN1         | 1 | chr11 |
| COL4A5       | 1 | chrX  |
| PMF1         | 1 | chr1  |
| CYP2E1       | 1 | chr10 |
| GOLGB1       | 1 | chr3  |
| FBXW11       | 1 | chr5  |
| CXCR3        | 1 | chrX  |
| PTER         | 1 | chr10 |
| ANKFY1       | 1 | chr17 |
| CYFIP1       | 1 | chr15 |
| VIPR2        | 1 | chr7  |
| LRRC49       | 1 | chr15 |
| ABLIM2       | 1 | chr4  |
| CHD4         | 1 | chr12 |
| COL18A1      | 1 | chr21 |
| DPP9         | 1 | chr19 |
| FAM184B      | 1 | chr4  |
| DENND1C      | 1 | chr19 |
| CDH12        | 1 | chr5  |
| C8orf44-SGK3 | 1 | chr8  |

|          |   |       |
|----------|---|-------|
| ITIH3    | 1 | chr3  |
| HMHA1    | 1 | chr19 |
| PAK4     | 1 | chr19 |
| ABCB5    | 1 | chr7  |
| ESR1     | 1 | chr6  |
| LAMA4    | 1 | chr6  |
| BAI1     | 1 | chr8  |
| FAM69C   | 1 | chr18 |
| SH3RF3   | 1 | chr2  |
| HCRTR2   | 1 | chr6  |
| GNAT1    | 1 | chr3  |
| NAGPA    | 1 | chr16 |
| ZFH3     | 1 | chr16 |
| TFAP2A   | 1 | chr6  |
| PLXDC1   | 1 | chr17 |
| MSH2     | 1 | chr2  |
| POC1B    | 1 | chr12 |
| PDE9A    | 1 | chr21 |
| CADPS    | 1 | chr3  |
| FBLN7    | 1 | chr2  |
| GPR98    | 1 | chr5  |
| B3GALT6  | 1 | chr1  |
| ACYP1    | 1 | chr14 |
| BTBD16   | 1 | chr10 |
| SUPT3H   | 1 | chr6  |
| MUC17    | 1 | chr7  |
| MLF1     | 1 | chr3  |
| GTF3C1   | 1 | chr16 |
| BICD1    | 1 | chr12 |
| EHMT1    | 1 | chr9  |
| AKT1     | 1 | chr14 |
| ESR2     | 1 | chr14 |
| COL5A3   | 1 | chr19 |
| CHFR     | 1 | chr12 |
| DOCK8    | 1 | chr9  |
| DYM      | 1 | chr18 |
| HRH2     | 1 | chr5  |
| ABCA2    | 1 | chr9  |
| KIAA1614 | 1 | chr1  |
| ADNP2    | 1 | chr18 |
| IFT140   | 1 | chr16 |
| SUV420H2 | 1 | chr19 |
| KIRREL3  | 1 | chr11 |
| SLC26A5  | 1 | chr7  |
| MSRA     | 1 | chr8  |
| MIR548AN | 1 | chr13 |

|           |   |       |
|-----------|---|-------|
| AP3S2     | 1 | chr15 |
| SULF2     | 1 | chr20 |
| BPTF      | 1 | chr17 |
| CAMK2B    | 1 | chr7  |
| KCNN3     | 1 | chr1  |
| IQSEC1    | 1 | chr3  |
| GATA4     | 1 | chr8  |
| GEMIN7    | 1 | chr19 |
| LOC284379 | 1 | chr19 |
| TTC7B     | 1 | chr14 |
| ZNF398    | 1 | chr7  |
| PCSK2     | 1 | chr20 |
| APOC1     | 1 | chr19 |
| VGLL4     | 1 | chr3  |
| AGPS      | 1 | chr2  |
| PDE12     | 1 | chr3  |
| IFNL4     | 1 | chr19 |
| NUBPL     | 1 | chr14 |
| MEGF6     | 1 | chr1  |
| FAM101B   | 1 | chr17 |
| XIAP      | 1 | chrX  |
| EMC1      | 1 | chr1  |
| RHOH      | 1 | chr4  |
| EML1      | 1 | chr14 |
| NELL1     | 1 | chr11 |
| WDR90     | 1 | chr16 |
| IGSF21    | 1 | chr1  |
| DCTN2     | 1 | chr12 |
| MIPEP     | 1 | chr13 |
| TNNI3K    | 1 | chr1  |
| STK3      | 1 | chr8  |
| KLHL15    | 1 | chrX  |
| RREB1     | 1 | chr6  |
| ASF1B     | 1 | chr19 |
| SPON1     | 1 | chr11 |
| SESTD1    | 1 | chr2  |
| PEPD      | 1 | chr19 |
| SAMD3     | 1 | chr6  |
| TANC1     | 1 | chr2  |
| LINC00523 | 1 | chr14 |
| SMOC1     | 1 | chr14 |
| TBC1D22A  | 1 | chr22 |
| LYPD2     | 1 | chr8  |
| EP400     | 1 | chr12 |
| THEM4     | 1 | chr1  |
| USP8      | 1 | chr15 |

|           |   |       |
|-----------|---|-------|
| LYRM4     | 1 | chr6  |
| BEST1     | 1 | chr11 |
| RAB5B     | 1 | chr12 |
| AP1M1     | 1 | chr19 |
| MAGEA4    | 1 | chrX  |
| RUNX3     | 1 | chr1  |
| WDR19     | 1 | chr4  |
| DDX1      | 1 | chr2  |
| RASGRF1   | 1 | chr15 |
| SLC7A7    | 1 | chr14 |
| PARVB     | 1 | chr22 |
| SLC7A5    | 1 | chr16 |
| EPHA1-AS1 | 1 | chr7  |
| DNAH11    | 1 | chr7  |
| CIT       | 1 | chr12 |
| NPY       | 1 | chr7  |
| EBF4      | 1 | chr20 |
| NXN       | 1 | chr17 |
| C6orf123  | 1 | chr6  |
| MYH7B     | 1 | chr20 |
| ENPP6     | 1 | chr4  |
| RBPM5     | 1 | chr8  |
| SMAD6     | 1 | chr15 |
| EPB41L2   | 1 | chr6  |
| SLCO2B1   | 1 | chr11 |
| NBL1      | 1 | chr1  |
| GRM5      | 1 | chr11 |
| SH3BP2    | 1 | chr4  |
| MECOM     | 1 | chr3  |
| MAP2K2    | 1 | chr19 |
| CLCN7     | 1 | chr16 |
| SCFD2     | 1 | chr4  |
| ATXN1     | 1 | chr6  |
| DDX6      | 1 | chr11 |
| KIAA1432  | 1 | chr9  |
| NLRP3     | 1 | chr1  |
| LOC440970 | 1 | chr3  |
| GNAZ      | 1 | chr22 |
| DCAF12L2  | 1 | chrX  |
| IL1RAPL1  | 1 | chrX  |
| PCDHA9    | 1 | chr5  |
| EIF4A3    | 1 | chr17 |
| TNPO3     | 1 | chr7  |
| EXD3      | 1 | chr9  |
| CHMP6     | 1 | chr17 |
| CACNA2D1  | 1 | chr7  |



|             |   |       |
|-------------|---|-------|
| LYRM7       | 1 | chr5  |
| LINC00174   | 1 | chr7  |
| LAMA3       | 1 | chr18 |
| TMEM132D    | 1 | chr12 |
| AP2A2       | 1 | chr11 |
| CABP1       | 1 | chr12 |
| CATSPERD    | 1 | chr19 |
| CCT3        | 1 | chr1  |
| SHB         | 1 | chr9  |
| DIAPH2      | 1 | chrX  |
| PRR12       | 1 | chr19 |
| CTU2        | 1 | chr16 |
| B4GALNT4    | 1 | chr11 |
| ARHGEF10    | 1 | chr8  |
| ERC1        | 1 | chr12 |
| ARMCX4      | 1 | chrX  |
| EIF2AK4     | 1 | chr15 |
| DLGAP3      | 1 | chr1  |
| SERPINH1    | 1 | chr11 |
| MND1        | 1 | chr4  |
| ZZEF1       | 1 | chr17 |
| SEMA7A      | 1 | chr15 |
| GTF2IRD1    | 1 | chr7  |
| FAM109B     | 1 | chr22 |
| EED         | 1 | chr11 |
| DGKE        | 1 | chr17 |
| SHISA6      | 1 | chr17 |
| DGCR5       | 1 | chr22 |
| TNFAIP2     | 1 | chr14 |
| CAPN13      | 1 | chr2  |
| CAMSAP3     | 1 | chr19 |
| FFAR1       | 1 | chr19 |
| BEND2       | 1 | chrX  |
| ITGBL1      | 1 | chr13 |
| AP3B2       | 1 | chr15 |
| TMEM44      | 1 | chr3  |
| TMEM130     | 1 | chr7  |
| FAIM2       | 1 | chr12 |
| ARNT2       | 1 | chr15 |
| FGF2        | 1 | chr4  |
| FPGT-TNNI3K | 1 | chr1  |
| ASCL3       | 1 | chr11 |
| ADAMTS20    | 1 | chr12 |
| LOC653160   | 1 | chr1  |
| FAM189A1    | 1 | chr15 |
| SEPSECS     | 1 | chr4  |

|              |   |       |
|--------------|---|-------|
| NDP          | 1 | chrX  |
| TRIM61       | 1 | chr4  |
| EHD1         | 1 | chr11 |
| SEC14L1      | 1 | chr17 |
| GSK3B        | 1 | chr3  |
| TECPR2       | 1 | chr14 |
| SLC12A3      | 1 | chr16 |
| FAM129C      | 1 | chr19 |
| RORA         | 1 | chr15 |
| PIGU         | 1 | chr20 |
| TNRC18       | 1 | chr7  |
| MUC16        | 1 | chr19 |
| ITGB2        | 1 | chr21 |
| KLHL29       | 1 | chr2  |
| UHRF1BP1L    | 1 | chr12 |
| MYBBP1A      | 1 | chr17 |
| IQSEC3       | 1 | chr12 |
| PTCHD3       | 1 | chr10 |
| MIR548AC     | 1 | chr3  |
| PCSK4        | 1 | chr19 |
| MASP2        | 1 | chr1  |
| TENM4        | 1 | chr11 |
| ZNF99        | 1 | chr19 |
| VAV2         | 1 | chr9  |
| C9orf171     | 1 | chr9  |
| PLXNB2       | 1 | chr22 |
| PPP2R2B      | 1 | chr5  |
| AASDH        | 1 | chr4  |
| KSR1         | 1 | chr17 |
| QRICH2       | 1 | chr17 |
| C6orf147     | 1 | chr6  |
| TGFBRAP1     | 1 | chr2  |
| LOC283692    | 1 | chr15 |
| BSN          | 1 | chr3  |
| FHIT         | 1 | chr3  |
| HADHA        | 1 | chr2  |
| LINC00294    | 1 | chr11 |
| LOXL2        | 1 | chr8  |
| MFSD4        | 1 | chr1  |
| CTPS2        | 1 | chrX  |
| AFMID        | 1 | chr17 |
| LOC100288181 | 1 | chr8  |
| PODN         | 1 | chr1  |
| TRAPPC8      | 1 | chr18 |
| IDO2         | 1 | chr8  |
| RIPK4        | 1 | chr21 |

|              |   |       |
|--------------|---|-------|
| TBC1D8       | 1 | chr2  |
| ITPR2        | 1 | chr12 |
| PNPT1        | 1 | chr2  |
| ARSF         | 1 | chrX  |
| TAZ          | 1 | chrX  |
| ARHGAP23     | 1 | chr17 |
| RAB20        | 1 | chr13 |
| GNG7         | 1 | chr19 |
| NPEPL1       | 1 | chr20 |
| FCHO1        | 1 | chr19 |
| OTOA         | 1 | chr16 |
| SLC37A1      | 1 | chr21 |
| EFCAB4B      | 1 | chr12 |
| KAT2B        | 1 | chr3  |
| PUS1         | 1 | chr12 |
| CACNA1D      | 1 | chr3  |
| DOK7         | 1 | chr4  |
| TUFT1        | 1 | chr1  |
| DRD5         | 1 | chr4  |
| KLK13        | 1 | chr19 |
| PDE1A        | 1 | chr2  |
| SLC13A5      | 1 | chr17 |
| KLHL3        | 1 | chr5  |
| PRUNE2       | 1 | chr9  |
| CHD5         | 1 | chr1  |
| URGCP-MRPS24 | 1 | chr7  |
| ESPL1        | 1 | chr12 |
| DYDC2        | 1 | chr10 |
| COLEC11      | 1 | chr2  |
| RALYL        | 1 | chr8  |
| METTL8       | 1 | chr2  |
| PCCA         | 1 | chr13 |
| KIF17        | 1 | chr1  |
| POLRMT       | 1 | chr19 |
| HIVEP3       | 1 | chr1  |
| KIAA1751     | 1 | chr1  |
| KIF19        | 1 | chr17 |
| COL17A1      | 1 | chr10 |
| SLC45A1      | 1 | chr1  |
| TEKT5        | 1 | chr16 |
| SLC35E2      | 1 | chr1  |
| PCDHB8       | 1 | chr5  |
| RNF222       | 1 | chr17 |
| KCNG2        | 1 | chr18 |
| KLHL6        | 1 | chr3  |
| SLC51A       | 1 | chr3  |

|              |   |       |
|--------------|---|-------|
| TPT1-AS1     | 1 | chr13 |
| MAD2L2       | 1 | chr1  |
| PPFIA3       | 1 | chr19 |
| HTRA3        | 1 | chr4  |
| TRPM4        | 1 | chr19 |
| NFIC         | 1 | chr19 |
| FAM19A4      | 1 | chr3  |
| TRPM1        | 1 | chr15 |
| WDR24        | 1 | chr16 |
| HEPHL1       | 1 | chr11 |
| STK11        | 1 | chr19 |
| PACSIN1      | 1 | chr6  |
| GAD1         | 1 | chr2  |
| IFT27        | 1 | chr22 |
| SSU72        | 1 | chr1  |
| PLEKHG4B     | 1 | chr5  |
| LOC100130954 | 1 | chr9  |
| ACSL6        | 1 | chr5  |
| TMF1         | 1 | chr3  |
| SGSM1        | 1 | chr22 |
| PLA2G3       | 1 | chr22 |
| AIDA         | 1 | chr1  |
| BCL11B       | 1 | chr14 |
| MAN2B2       | 1 | chr4  |
| GRM3         | 1 | chr7  |
| HPS5         | 1 | chr11 |
| FAM19A1      | 1 | chr3  |
| SLC2A6       | 1 | chr9  |
| DYDC1        | 1 | chr10 |
| TGIF1        | 1 | chr18 |
| TSPAN11      | 1 | chr12 |
| TENM1        | 1 | chrX  |
| CACNG4       | 1 | chr17 |
| C21orf2      | 1 | chr21 |
| FAM227A      | 1 | chr22 |
| TSPAN2       | 1 | chr1  |
| CLPTM1       | 1 | chr19 |
| CDH10        | 1 | chr5  |
| DOK2         | 1 | chr8  |
| PLAC1L       | 1 | chr11 |
| ST6GAL2      | 1 | chr2  |
| C20orf26     | 1 | chr20 |
| TEX2         | 1 | chr17 |
| FAM211B      | 1 | chr22 |
| CA9          | 1 | chr9  |
| AEN          | 1 | chr15 |

|             |   |       |
|-------------|---|-------|
| TSPEAR      | 1 | chr21 |
| LOC286059   | 1 | chr8  |
| HDGFRP2     | 1 | chr19 |
| MAML2       | 1 | chr11 |
| NRP2        | 1 | chr2  |
| CACNA1I     | 1 | chr22 |
| ABO         | 1 | chr9  |
| NFASC       | 1 | chr1  |
| MIR143HG    | 1 | chr5  |
| PLAUR       | 1 | chr19 |
| MLLT10      | 1 | chr10 |
| GBF1        | 1 | chr10 |
| ENGASE      | 1 | chr17 |
| MTMR6       | 1 | chr13 |
| VAT1L       | 1 | chr16 |
| TMX2-CTNND1 | 1 | chr11 |
| GPHN        | 1 | chr14 |
| TJP2        | 1 | chr9  |
| EYA2        | 1 | chr20 |
| TRPC2       | 1 | chr11 |
| OPRD1       | 1 | chr1  |
| PNMA3       | 1 | chrX  |
| MGAT3       | 1 | chr22 |
| RBFOX1      | 1 | chr16 |
| CPPED1      | 1 | chr16 |
| COL14A1     | 1 | chr8  |
| IRF2        | 1 | chr4  |
| FAM149B1    | 1 | chr10 |
| LHPP        | 1 | chr10 |
| SETD1B      | 1 | chr12 |
| TOM1L1      | 1 | chr17 |
| TFCP2       | 1 | chr12 |
| HSF1        | 1 | chr8  |
| FERMT1      | 1 | chr20 |
| ARHGAP42    | 1 | chr11 |
| IL6R        | 1 | chr1  |
| IGF1R       | 1 | chr15 |
| MYO15A      | 1 | chr17 |
| NR2F1       | 1 | chr5  |
| TMEM255B    | 1 | chr13 |
| C10orf68    | 1 | chr10 |
| EPHA2       | 1 | chr1  |
| NLRP12      | 1 | chr19 |
| COL18A1-AS1 | 1 | chr21 |
| MSANTD1     | 1 | chr4  |
| NEO1        | 1 | chr15 |

|          |   |       |
|----------|---|-------|
| FRRS1L   | 1 | chr9  |
| ABCG1    | 1 | chr21 |
| ARHGAP9  | 1 | chr12 |
| ANKRD13C | 1 | chr1  |
| ABCC6    | 1 | chr16 |
| SBF1     | 1 | chr22 |
| TNFRSF8  | 1 | chr1  |
| GALK2    | 1 | chr15 |
| INF2     | 1 | chr14 |
| ACSM1    | 1 | chr16 |
| ALDH1L1  | 1 | chr3  |
| DGKQ     | 1 | chr4  |
| C16orf62 | 1 | chr16 |
| SLC38A10 | 1 | chr17 |

**site locations**

80885897,80885901,80885910,80885924,80885930,80885933,80885952,80885978,8  
42837822,42837883,42837904,42854040,42854072,42854116,42863011,42863013,4  
157412971,157585437,157606110,157700218,157793222,157799746,157933157,158  
101649441,101694275,101848789,101858142,101892327,101771662,101777540,10  
179561,179581,179588,179614,179616,179623,179642,179644,179653,179657  
138085209,138136408,138136474,138277128,138277131,138277156,138277167,138  
89038729,88951509,88951647,88953882,88991154,88991157,88998226  
60283593,60450242,59859294,59934559,60020737,60452249,60459503  
14423492,14423493,14759025,14827364,15966163,15984559,15984564  
177741111,177808674,177808675,177968358,177968359,177976214,177980043  
105622204,105622207,105622212,105622243,105622249,105622272  
33674736,33729246,33729283,33911677,34060801,34291144  
1475095,1475107,1475129,1475142,1475143,1475188  
55138245,55104159,55104627,55105156,55105169,55105189  
130863889,130863893,130863895,130863905,130863933,130863951  
77157797,77202644,77202645,77204766,77220878,77221799  
88951509,88951647,88953882,88991154,88991157,88998226  
153899667,154585884,154585887,154585915,154585968  
77202644,77202645,77204766,77220878,77221799  
5029979,5038242,5047168,5047192,5058704  
3828373,4208389,4248269,4256137,4256138  
61490244,61511261,61456424,61458594,61494325  
78807502,78597523,78683458,78793474,78847067  
161575874,161575882,161575904,161575910  
128987146,128987362,128987417,129018407  
2266933,2310576,2258323,2267568  
60898505,60926221,60930091,60938308  
239997710,240043297,240170032,240170077  
1222301,1224540,1224647,1227951  
54500162,54500200,54500355,54500455  
80829706,80829707,80895531,80898095  
3644890,3645428,3648757,3660867  
63904583,63859606,63859699,63915389  
49022855,49022886,49022891,49022902  
177546160,177548186,177548195,177548237  
101903335,101915394,101924537,101924539  
31912609,31693636,32094716,32603677  
2040761,2040776,2041154,2048727  
355048,435782,308947,407802  
6213284,6213311,6213321,6212546  
100538150,100667714,100788211,100800292  
150834304,150834312,150834334,150834359  
3227502,3277484,3386339,3386340  
32721664,32721665,32770312,32770392  
242706955,242706956,242706979,242707772

60283593,60450242,60452249,60459503  
6999818,7633798,7639870,7742833  
245381025,245393901,245681000,245715801  
154585884,154585887,154585915,154585968  
150375271,150410977,150423966,150423967  
234633332,234663626,234663653  
76506973,76507053,76565604  
63269640,63269641,63328784  
31912609,31693636,32094716  
234633332,234663626,234663653  
1777815,1778321,1784265  
236613477,236754256,236847317  
234633332,234663626,234663653  
162850908,162254655,163096348  
148904623,148904794,148909758  
39753991,39754000,39754031  
16561923,16561939,16561955  
5998344,5998328,5998366  
1211221,1214678,1235322  
71797711,71692546,71697519  
1148048,1164139,1169021  
58560322,58610256,58610257  
2187851,2198844,2226675  
1496555,1493528,1505751  
234633332,234663626,234663653  
146050135,146191221,147179769  
100545379,100260559,100260560  
168918740,168928224,168876493  
15966163,15984559,15984564  
107811641,107811682,107828183  
234633332,234663626,234663653  
47546079,47546166,47546179  
6384299,6689474,6869494  
50239356,50239403,50239404  
126715435,126719831,126719832  
24155526,24155527,24160216  
101915394,101924537,101924539  
132329206,132334754,132334766  
5774950,5802998,5800830  
70425842,70425843,70437604  
159519410,159519451,159519478  
88793822,88793842,88797567  
234633332,234663626,234663653  
76400505,76400506,76414300  
91609462,91609508,91609532  
77080287,76889937,76910759



75880423,75893632,75893633  
1777815,1778321,1784265  
82360631,82360632,82360648  
33609541,33652116,33993318  
2522201,2522203,2522391  
58552731,58545712,58545730  
3526496,3526784,3533273  
67361019,67361031,67355844  
160102680,160102724,160102738  
2522201,2522203,2522391  
36120888,36101742,36227031  
151078769,151078803,151078848  
131519660,131521885,131549814  
84212777,84212709,84212710  
124799642,124545513,124568638  
45113150,45117629,45187308  
128853053,129084727,129169510  
1645478,1649416,1663210  
234633332,234663626,234663653  
23505467,23505575,23505616  
152276148,152276670,152286107  
168458073,168474308,168479602  
12412836,12412837,12739548  
70837080,70880637,70896088  
175269482,174850766,174850843  
151083585,151085415,151102302  
36120888,36101742,36227031  
112525003,112525024,112525031  
139389767,139424016  
34188708,34214991  
92347650,92577340  
119566196,119574608  
140222356,140233651  
18934349,18934350  
204417023,204436065  
651516,678843  
419921,419974  
183713815,183713816  
72083976,72084146  
3423441,3374161  
79495020,79495022  
10247268,10258560  
143957576,143957579  
32556483,32831129  
156878421,156883491  
45113150,45117629

49035765,49057291  
4190519,4190586  
44686590,44686635  
97543776,97622919  
68821860,68853503  
44280703,44290375  
140930848,140968750  
214822,226491  
2291790,2293508  
2020462,2024445  
140222356,140233651  
2131565,2131578  
113362104,113398928  
48841796,48844977  
1206496,1206503  
134681693,134727535  
27128732,27140921  
2495420,2798848  
42492062,42492104  
14712665,14712697  
119898276,119898281  
16269140,16269141  
210152514,210152515  
696500,696502  
147128588,147128594  
141294992,142022616  
92923939,92934607  
50191970,50199589  
210575775,210575776  
51417503,51417534  
34961674,34961676  
41962818,41882537  
114880846,114821692  
99662864,99662866  
124219472,124219530  
75621019,75639854  
27015760,27015761  
133787347,133789012  
62275844,62278385  
75348109,75372848  
38554304,38697053  
125119660,125398121  
151398709,151560141  
219186591,219146078  
743982,846798  
21134595,21134596

36807480,36810010  
84503767,84692728  
84608934,84615224  
117544836,117566161  
37549199,37552988  
77918012,77972065  
79042974,79063592  
202638788,202638789  
7494167,7738401  
44286088,44286196  
168458073,168474308  
6132067,6143145  
1587041,1587042  
34642382,34642490  
77674633,77683125  
124987743,124987769  
17240198,17188322  
237382688,237382689  
113642833,113705141  
140963179,141002309  
36869012,36869013  
233399443,233399444  
63005076,63005079  
5238770,5263766  
7405073,7411770  
140222356,140233651  
43044767,43044775  
114161310,114166775  
130918981,130902391  
67197164,67197166  
236613477,236754256  
25064191,25109803  
140222356,140233651  
28070739,28256783  
70910031,70910888  
228491298,228491315  
48257325,48257326  
111342297,111313236  
73669043,73681089  
25441432,25441935  
71797711,71697519  
38794450,38794465  
234663626,234663653  
241387005,241387018  
93805879,94003834  
80491066,80508538

52317474,52455803  
1023891,1024479  
34854425,34988706  
46892956,46844086  
58610256,58610257  
142721759,142721761  
56732799,56733571  
120433495,120433500  
19660981,19693869  
129048851,128900119  
190352746,190352783  
3936650,3982840  
230552095,230552128  
1084332,1103036  
1643950,1728452  
62049177,62056325  
48689798,48689799  
138973585,138974330  
66479904,66479905  
105518054,105518091  
140222356,140233651  
131069818,131427223  
152746484,152746485  
11591735,11591802  
77767075,77767077  
55494187,55495378  
2041493,2041581  
39271537,39271538  
1109849,1114171  
99047710,99047711  
234663626,234663653  
69971133,69979164  
114294417,114294418  
45565093,45565384  
143313650,143358298  
61547236,61547237  
75611354,75614294  
242584161,242610500  
101924537,101924539  
872324,1042396  
134372679,134372680  
9820694,9820695  
96508663,96798784  
83679935,83679983  
137005022,137005023  
136648374,136648854

188918159,188918166  
1387347,1388103  
1244109,1245384  
46908054,46839894  
128340901,128367090  
196634118,196634119  
47327858,47768048  
140222356,140233651  
33132490,33132491  
195925355,195933370  
925290,941519  
26915677,26915701  
50935282,50935283  
51417503,51417534  
101349763,101349172  
39070929,39071020  
870042,878078  
3101637,3102462  
108554540,108715748  
173103159,173030020  
150194484,150202102  
1100693,1044953  
70526843,70585373  
45785484,45785490  
48339984,48339985  
26971734,26971735  
1135221,1151618  
16298268,16298269  
128611281,128611282  
367482,444996  
5048201,5095792  
22471822,22471823  
186699811,186536056  
140222356,140233651  
3116362,3117519  
1252535,1252536  
105584366,105480533  
77918012,77906392  
117846079,117846080  
2353556,2353557  
99047710,99047711  
3228639,3279800  
97979532,97979533  
178701724,178689460  
140222356,140233651  
130989049,130935954

125448959,125455371  
139101770,139129414  
155410665,155410924  
77379705,77648689  
241674447,241686408  
3053682,3053761  
79959659,79972901  
29227420  
57552264  
3621933  
76990688  
35502532  
41050290  
25196084  
65269045  
123817855  
55703497  
40992887  
57986974  
4622638  
27886902  
88920677  
69785793  
60816889  
15347782  
22527642  
129417210  
139715360  
10253162  
619634  
138831135  
153311755  
5741195  
186077900  
84514963  
32849448  
14506631  
36975759  
94211502  
2937629  
41305237  
144449706  
39631463  
26087639  
136382602  
120798926

49106994  
50823429  
23896981  
1038212  
167182470  
53218181  
153033730  
813867  
87974503  
20005511  
63808062  
169652497  
33601000  
114555024  
1244986  
204219848  
49365211  
144461039  
23441116  
52995043  
1397814  
197665044  
184848069  
25551130  
151398709  
76762264  
752449  
4749980  
30595325  
232933589  
3192535  
25248474  
42395130  
36135842  
23848310  
161500455  
151998404  
2824332  
39933047  
213048256  
68831858  
21892980  
8088757  
8640380  
32485154  
14260075

1712978  
22479988  
57274149  
33096643  
142459700  
112991312  
82152238  
119206373  
59938978  
105349687  
74097118  
156189625  
111149356  
47086345  
9126976  
74336971  
233566677  
47074257  
15576600  
9426363  
109717108  
134494941  
27062535  
72949954  
81166557  
117883900  
32909180  
47325314  
2810246  
19573576  
28149330  
22385757  
18398207  
98132016  
18183527  
107417280  
42969129  
681359  
10572060  
15127614  
37923004  
13936132  
145687183  
96378109  
95088562  
31372187



71858218  
63543646  
73595712  
79368458  
111784923  
43598340  
25978582  
11988839  
46511614  
66733266  
2261683  
41200425  
64790137  
13571929  
8993970  
44856096  
145252482  
201475722  
214490660  
779687  
101380931  
56113828  
95762833  
225394812  
120538685  
105540724  
13811655  
1532399  
50288630  
57080660  
96580857  
42990074  
219691758  
23995795  
179145862  
56845938  
39624043  
46700057  
61562922  
219146078  
31503149  
89498970  
129702080  
686712  
4945917  
140222356

132871604  
33269800  
72436305  
128587817  
30747191  
186536056  
69011119  
159789608  
48018415  
9311701  
19978899  
149795690  
43923161  
174423979  
61609749  
26404206  
119533732  
4984168  
133593565  
65412778  
133259807  
1464589  
149846961  
27152161  
44330555  
77708969  
56511221  
101226340  
19752319  
37457414  
99137831  
28296877  
67854284  
58879005  
1229850  
126715435  
23891602  
52098511  
184631918  
16161030  
74646222  
48205286  
54671147  
73669147  
27421654  
43185498

16759621  
153176005  
65220461  
29485475  
114432861  
31884043  
155323907  
48244355  
158857015  
133906248  
35332660  
152192113  
39828294  
131316315  
36353936  
84256410  
3396490  
3960019  
242252838  
65286227  
26566755  
130638028  
89180081  
79562574  
60192106  
19383370  
121301386  
212566718  
57114786  
136030518  
36660728  
27501475  
1279429  
24983263  
55874093  
107241950  
59803822  
118392543  
76862024  
7286344  
74472337  
151615685  
228110732  
16787670  
74009153  
130434201

32632850  
24801314  
134188872  
219328681  
227975544  
10481532  
42143536  
205819038  
139883644  
143747271  
1538262  
78357293  
20894616  
70886007  
40518778  
12015766  
144081249  
29968344  
21183608  
9804096  
1014999  
116918686  
33630987  
98259396  
51051276  
127048907  
9588490  
183576819  
52985695  
13695712  
124799642  
19025380  
241402337  
57889227  
65406869  
129385813  
69042827  
1576635  
44198397  
26384142  
19583733  
655106  
118143818  
40175144  
53588498  
29780291

6920956  
3234979  
89067474  
243649329  
1574811  
100750835  
136199502  
49277055  
22069818  
194063152  
33354403  
1956361  
50318505  
86995791  
104628693  
41122515  
1493030  
58566803  
77362729  
82045876  
42805236  
183493990  
75372848  
145607536  
148480233  
102277334  
8875318  
50661499  
94516767  
145895164  
7147974  
12174662  
502552  
42934500  
44373190  
55363590  
13679214  
40287102  
124399154  
71951803  
35753205  
111763399  
101393295  
62199258  
93364910  
71682280

17725744  
1791956  
6331427  
57177663  
1203558  
31523720  
10798255  
72542960  
49517215  
24832885  
56736652  
81050220  
47691729  
119363071  
36893856  
57283974  
90425672  
121661688  
30503727  
25638407  
78404394  
54281212  
71290557  
36680376  
128200720  
146030084  
191150856  
90001561  
35718191  
8557871  
59992426  
5338900  
113981251  
147179769  
34702884  
30955122  
6469895  
124826676  
14260075  
45187308  
86184442  
42951036  
44585591  
39883987  
897518  
123681139

60598912  
174410846  
41087062  
89656043  
79914706  
72999772  
4287197  
132956228  
19596138  
427782  
32505613  
51012814  
95741647  
60728953  
58406749  
2938265  
2334259  
129265545  
62226857  
29503557  
113705141  
2000129  
27244129  
42232916  
123982970  
92622010  
106007285  
308947  
65415951  
85517291  
24301369  
53885310  
25691215  
6465694  
110343617  
2214430  
48844977  
46195925  
5175313  
66602320  
228472980  
86267676  
109933638  
133169726  
129534618  
28063222

141846292  
40459032  
97543776  
194077617  
91775504  
2871451  
13430489  
4854735  
33128890  
4857396  
86369306  
19408117  
34711337  
99058795  
31121792  
1841741  
14482374  
86280873  
8219261  
58300770  
2131289  
37578578  
84872049  
23742538  
79224683  
146068321  
66099987  
107745702  
156189625  
135341790  
121407725  
171356637  
70837080  
16504929  
4165347  
22896102  
158896515  
71332985  
8019279  
6715084  
46892956  
4697654  
17657991  
6471896  
22116020  
67618114



52837614  
1071946  
39622241  
20749914  
152077845  
112505108  
143545931  
72110160  
109973837  
55104936  
50231058  
5075224  
73001596  
10398600  
37265192  
47653645  
89897387  
44152788  
62417145  
112899507  
89896790  
1168540  
75528578  
124089034  
45249548  
100684925  
158319418  
27491291  
32528150  
140653360  
105249322  
64774314  
10102490  
133420273  
274107  
46917064  
175091697  
139904754  
180897569  
77879657  
1641550  
55856850  
126453648  
103016782  
10280165  
100043086

90425672  
46344569  
65867128  
44303189  
154810845  
12946689  
11566772  
45587004  
54106545  
91044069  
148864851  
17411845  
45421742  
11611732  
178331204  
57544713  
39737866  
32180470  
3450637  
291094  
123046829  
19573205  
40238931  
100402814  
20855645  
711711  
18527092  
57925285  
24341072  
74712951  
99751599  
24014551  
7223662  
14231242  
14099081  
180013583  
33986662  
130608855  
159846583  
101138965  
70397475  
47508572  
143832768  
132558689  
151862660  
50752566

5154846  
61723377  
56385579  
16339715  
151087988  
25231279  
39233975  
15756328  
79268260  
23254214  
44515804  
87871580  
143111464  
21871891  
120150195  
24324808  
2717620  
743982  
168185593  
33583715  
185037323  
30334347  
66998856  
131245620  
74879862  
19978899  
88619806  
2829476  
169039199  
4094774  
1497136  
54198305  
16692260  
118659488  
5683494  
247582755  
84695352  
23441116  
125299550  
28765650  
140233651  
78114653  
128671100  
140238241  
78971536  
81928153

130529475  
65852199  
21324610  
130342963  
1001560  
121088884  
5744912  
156293490  
38042209  
96508663  
50105239  
88779323  
372156  
1790861  
1421739  
100713754  
40314967  
35369244  
75279846  
154302293  
3977531  
74709973  
73982269  
42473603  
85964886  
54933103  
11432290  
18961797  
103595564  
30955476  
7663229  
35843322  
18236885  
102277204  
83338891  
194344842  
98449155  
50280105  
80728029  
123787320  
74712951  
8959545  
43864935  
35442519  
29499634  
25158222

43829064  
165885356  
64621469  
75170673  
119689587  
102966001  
56947979  
17656840  
61489557  
33212945  
5427651  
8981896  
46339178  
23912711  
100518917  
4453814  
263439  
27702774  
23645147  
1485478  
11094202  
78534660  
22943371  
136778878  
135389134  
50721351  
146387464  
57249091  
25803230  
74294757  
74009153  
105923990  
83338891  
49701981  
60004440  
26440941  
33097876  
23155335  
205549384  
16727277  
76198457  
143795313  
53537264  
29457371  
39835886  
43165015

101654460  
26924516  
55869568  
3018925  
153648928  
36590622  
111207612  
2601809  
57274149  
17899267  
21727748  
43946639  
3761063  
20111266  
132423565  
53534199  
3466233  
151527035  
9783687  
51567573  
183363989  
6600139  
137007952  
79482728  
6180637  
43923161  
53665648  
82108898  
3660867  
85812638  
172274554  
101106210  
21035108  
626237  
41984584  
1898937  
72350966  
105815572  
8392394  
10778992  
1666807  
140559639  
8296629  
77629328  
183260073  
195955761

45919499  
11737881  
49629845  
8278123  
49669421  
3404316  
68931611  
31335686  
737791  
93833054  
1219701  
34466126  
171675123  
37159441  
1483008  
163768  
138468444  
131327896  
69089846  
25228296  
31533965  
222873966  
99679700  
6592474  
86457243  
18338734  
68516247  
136340458  
82108898  
3434261  
31133655  
123863938  
64982462  
45753891  
39013521  
115604657  
45490426  
24504697  
21770371  
59810619  
107459731  
20319385  
62233645  
24983263  
35674138  
89169651

45941327  
22927142  
4490302  
95965927  
206551978  
40060205  
136131436  
204907738  
148807225  
44166374  
21883429  
104089420  
77084652  
25825573  
77942603  
57552264  
67142112  
71779902  
45543675  
3649499  
29190137  
152225031  
39854307  
6869494  
12777971  
121164388  
185311568  
74928845  
126290561  
122249609  
53013356  
51513353  
145525404  
6062988  
100596464  
154416933  
99504127  
18054691  
92923939  
114467409  
33161834  
16455051  
54305731  
46844086  
3255741  
73427047



111926896  
43707726  
57872957  
70815636  
16280872  
50894847  
12188481  
49458652  
105171845  
20641660  
125834605  
958088  
19656650  
79261346

80885980,80885982,80885994,80885995,80885996,80886112,80886143  
.2863173,42863204,42863209,42863215  
3109457,158240238,158240243,158240257  
1842465,101842576,101842581

3285328,138285407

| <b>Gene name</b> | <b>number of high covariance sites</b> | <b>chromosome</b> |
|------------------|----------------------------------------|-------------------|
| ANTXR2           | 42                                     | chr4              |
| RGS22            | 13                                     | chr8              |
| PTPRN2           | 9                                      | chr7              |
| ELFN1            | 7                                      | chr7              |
| ANKMY1           | 7                                      | chr2              |
| CDH4             | 6                                      | chr20             |
| SPATC1L          | 6                                      | chr21             |
| PRDM16           | 6                                      | chr1              |
| LRP8             | 6                                      | chr1              |
| LARP1B           | 6                                      | chr4              |
| MIR548F5         | 5                                      | chr13             |
| LMF1             | 5                                      | chr16             |
| NFATC1           | 5                                      | chr18             |
| MAB21L1          | 5                                      | chr13             |
| NBEA             | 5                                      | chr13             |
| CHFR             | 5                                      | chr12             |
| ZNF467           | 5                                      | chr7              |
| SORCS2           | 5                                      | chr4              |
| AES              | 4                                      | chr19             |
| WDSUB1           | 4                                      | chr2              |
| BAIAP2           | 4                                      | chr17             |
| GOLGA3           | 4                                      | chr12             |
| MACF1            | 4                                      | chr1              |
| LOC100130992     | 4                                      | chr10             |
| NFATC1           | 4                                      | chr18             |
| FAM50B           | 4                                      | chr6              |
| CSMD1            | 4                                      | chr8              |
| SYNGR1           | 4                                      | chr22             |
| ZIC5             | 4                                      | chr13             |
| KANK1            | 4                                      | chr9              |
| SLC12A5          | 4                                      | chr20             |
| PDXK             | 4                                      | chr21             |
| SHANK2           | 4                                      | chr11             |
| RBFOX1           | 4                                      | chr16             |
| FAM19A5          | 4                                      | chr22             |
| RPRD2            | 4                                      | chr1              |
| MEGF6            | 3                                      | chr1              |
| DOK6             | 3                                      | chr18             |
| SYNPR            | 3                                      | chr3              |
| RIMBP2           | 3                                      | chr12             |
| PEX14            | 3                                      | chr1              |
| CUX1             | 3                                      | chr7              |
| HDAC4            | 3                                      | chr2              |
| DLGAP2           | 3                                      | chr8              |
| UQCRH            | 3                                      | chr1              |

|           |   |       |
|-----------|---|-------|
| CNOT1     | 3 | chr16 |
| ATP8B4    | 3 | chr15 |
| CACNA1H   | 3 | chr16 |
| LAMA5     | 3 | chr20 |
| SURF6     | 3 | chr9  |
| SSTR5     | 3 | chr16 |
| CDH4      | 3 | chr20 |
| CTBP2     | 3 | chr10 |
| KDM4B     | 3 | chr19 |
| NRG1      | 3 | chr8  |
| KIF26B    | 3 | chr1  |
| MICAL3    | 3 | chr22 |
| LOC441601 | 3 | chr11 |
| DEAF1     | 3 | chr11 |
| SHANK2    | 3 | chr11 |
| MAGIX     | 3 | chrX  |
| PGS1      | 3 | chr17 |
| EPPK1     | 3 | chr8  |
| FAM19A5   | 3 | chr22 |
| AP3M1     | 3 | chr10 |
| GOLGA3    | 3 | chr12 |
| GTF3C1    | 3 | chr16 |
| PRKCI     | 3 | chr3  |
| KCNQ2     | 3 | chr20 |
| CAPG      | 3 | chr2  |
| INPP5A    | 3 | chr10 |
| TPPP      | 3 | chr5  |
| IFT27     | 3 | chr22 |
| NLRP2     | 3 | chr19 |
| CABP1     | 2 | chr12 |
| WDR31     | 2 | chr9  |
| HIC1      | 2 | chr17 |
| TBC1D8    | 2 | chr2  |
| HSPA7     | 2 | chr1  |
| PITPNA    | 2 | chr17 |
| MRPL28    | 2 | chr16 |
| HIPK3     | 2 | chr11 |
| ABCC5     | 2 | chr3  |
| CARD11    | 2 | chr7  |
| HRAS      | 2 | chr11 |
| BCOR      | 2 | chrX  |
| ERLEC1    | 2 | chr2  |
| MYRF      | 2 | chr11 |
| FLJ12825  | 2 | chr12 |
| OSBPL5    | 2 | chr11 |
| NCOR2     | 2 | chr12 |

|            |   |       |
|------------|---|-------|
| CCT5       | 2 | chr5  |
| C20orf85   | 2 | chr20 |
| LPPR3      | 2 | chr19 |
| TSNARE1    | 2 | chr8  |
| DMD        | 2 | chrX  |
| FBXL18     | 2 | chr7  |
| TPCN2      | 2 | chr11 |
| PPP1R26    | 2 | chr9  |
| SH3BP2     | 2 | chr4  |
| 14-Sep     | 2 | chr7  |
| PCSK6      | 2 | chr15 |
| FAM53A     | 2 | chr4  |
| TEX2       | 2 | chr17 |
| DNMT3B     | 2 | chr20 |
| KCTD13     | 2 | chr16 |
| ENOSF1     | 2 | chr18 |
| SYT14      | 2 | chr1  |
| COL6A1     | 2 | chr21 |
| AEN        | 2 | chr15 |
| MRPL54     | 2 | chr19 |
| MED29      | 2 | chr19 |
| MKLN1      | 2 | chr7  |
| INF2       | 2 | chr14 |
| CNTNAP3    | 2 | chr9  |
| IL1RAP     | 2 | chr3  |
| GAS7       | 2 | chr17 |
| ARNT2      | 2 | chr15 |
| SLC25A25   | 2 | chr9  |
| ADAMTS13   | 2 | chr9  |
| SORCS1     | 2 | chr10 |
| RMND1      | 2 | chr6  |
| ENPP6      | 2 | chr4  |
| MACROD2    | 2 | chr20 |
| SLC9A3     | 2 | chr5  |
| CUX1       | 2 | chr7  |
| CACNB2     | 2 | chr10 |
| TNRC18     | 2 | chr7  |
| CTSD       | 2 | chr11 |
| ZDHHC14    | 2 | chr6  |
| LOC286094  | 2 | chr8  |
| LONP1      | 2 | chr19 |
| ERICH1-AS1 | 2 | chr8  |
| INO80D     | 2 | chr2  |
| FSTL3      | 2 | chr19 |
| USP48      | 2 | chr1  |
| ZNF57      | 2 | chr19 |

|           |   |       |
|-----------|---|-------|
| TXN2      | 2 | chr22 |
| SRP54     | 2 | chr14 |
| INO80     | 2 | chr15 |
| ANO9      | 2 | chr11 |
| VDR       | 2 | chr12 |
| CHMP2A    | 2 | chr19 |
| APBB2     | 2 | chr4  |
| ESR1      | 2 | chr6  |
| WDR86     | 2 | chr7  |
| MUC4      | 2 | chr3  |
| TSSC1     | 2 | chr2  |
| SDK2      | 2 | chr17 |
| PDE9A     | 2 | chr21 |
| IL32      | 2 | chr16 |
| ATG4B     | 2 | chr2  |
| XRN2      | 2 | chr20 |
| CDH4      | 2 | chr20 |
| PRDM15    | 2 | chr21 |
| CNOT1     | 2 | chr16 |
| MAD1L1    | 2 | chr7  |
| STIM1     | 2 | chr11 |
| PREX1     | 2 | chr20 |
| GREM1     | 2 | chr15 |
| VIPR2     | 2 | chr7  |
| ITPR3     | 2 | chr6  |
| KCNK17    | 2 | chr6  |
| UVSSA     | 2 | chr4  |
| GEMIN7    | 2 | chr19 |
| ATG7      | 2 | chr3  |
| OSBPL3    | 2 | chr7  |
| NACC2     | 2 | chr9  |
| IGF1      | 2 | chr12 |
| FANCC     | 2 | chr9  |
| MGMT      | 2 | chr10 |
| CBFA2T3   | 2 | chr16 |
| MOB2      | 2 | chr11 |
| LOC389332 | 2 | chr5  |
| PTPRG     | 2 | chr3  |
| HTR2C     | 2 | chrX  |
| KANK1     | 2 | chr9  |
| GLI3      | 2 | chr7  |
| EYA4      | 2 | chr6  |
| PRKCZ     | 2 | chr1  |
| GPC1      | 2 | chr2  |
| UGGT2     | 2 | chr13 |
| SENP5     | 2 | chr3  |

|              |   |       |
|--------------|---|-------|
| DRD4         | 2 | chr11 |
| GPR75-ASB3   | 2 | chr2  |
| IQSEC1       | 2 | chr3  |
| APOBEC3H     | 2 | chr22 |
| MMP25        | 2 | chr16 |
| ANP32E       | 2 | chr1  |
| KLRD1        | 2 | chr12 |
| FTHL17       | 2 | chrX  |
| TBC1D22A     | 2 | chr22 |
| FTSJ1        | 2 | chrX  |
| PCCA         | 2 | chr13 |
| PIGG         | 2 | chr4  |
| TNS3         | 2 | chr7  |
| RERE         | 2 | chr1  |
| FLI1         | 2 | chr11 |
| KIAA1967     | 2 | chr8  |
| MCF2L        | 2 | chr13 |
| PHF21B       | 2 | chr22 |
| COL4A2       | 2 | chr13 |
| MACROD1      | 2 | chr11 |
| SMAP1        | 2 | chr6  |
| RARA         | 2 | chr17 |
| MYO7A        | 2 | chr11 |
| PTPRT        | 2 | chr20 |
| CDH18        | 2 | chr5  |
| STX8         | 2 | chr17 |
| GREB1        | 2 | chr2  |
| TGIF1        | 2 | chr18 |
| MIR5694      | 2 | chr10 |
| FAM213B      | 1 | chr1  |
| LOC100289019 | 1 | chr9  |
| PRKX         | 1 | chrX  |
| KDM6A        | 1 | chrX  |
| CCDC40       | 1 | chr17 |
| GDF10        | 1 | chr10 |
| COL23A1      | 1 | chr5  |
| RPS6KB1      | 1 | chr17 |
| RNPEP        | 1 | chr1  |
| ARRB2        | 1 | chr17 |
| KCNJ12       | 1 | chr17 |
| BIN3         | 1 | chr8  |
| MSN          | 1 | chrX  |
| CAMK1G       | 1 | chr1  |
| MEIS3P1      | 1 | chr17 |
| FZR1         | 1 | chr19 |
| HHAT         | 1 | chr1  |

|               |   |       |
|---------------|---|-------|
| FXR1          | 1 | chr3  |
| RHOBTB3       | 1 | chr5  |
| RTEL1-TNFRSF1 | 1 | chr20 |
| UBAC1         | 1 | chr9  |
| MTRF1L        | 1 | chr6  |
| RAB3GAP1      | 1 | chr2  |
| LDB2          | 1 | chr4  |
| ZNF746        | 1 | chr7  |
| UNC5B         | 1 | chr10 |
| TNS1          | 1 | chr2  |
| ACAD9         | 1 | chr3  |
| MCPH1         | 1 | chr8  |
| DHTKD1        | 1 | chr10 |
| PDZD8         | 1 | chr10 |
| LPP           | 1 | chr3  |
| LTK           | 1 | chr15 |
| CLN6          | 1 | chr15 |
| KLHL22        | 1 | chr22 |
| BMP8A         | 1 | chr1  |
| LCP1          | 1 | chr13 |
| NAALADL2      | 1 | chr3  |
| IGSF11        | 1 | chr3  |
| DPP6          | 1 | chr7  |
| SLC6A18       | 1 | chr5  |
| PLEKHA6       | 1 | chr1  |
| TRPV3         | 1 | chr17 |
| DRAM1         | 1 | chr12 |
| RHBDL3        | 1 | chr17 |
| SH2B1         | 1 | chr16 |
| DDAH1         | 1 | chr1  |
| DZANK1        | 1 | chr20 |
| MMEL1         | 1 | chr1  |
| BCL2L14       | 1 | chr12 |
| CD163L1       | 1 | chr12 |
| DNMT3A        | 1 | chr2  |
| KLF12         | 1 | chr13 |
| PARD3         | 1 | chr10 |
| PI4K2B        | 1 | chr4  |
| ELOVL6        | 1 | chr4  |
| CTDP1         | 1 | chr18 |
| BSND          | 1 | chr1  |
| SFMBT1        | 1 | chr3  |
| NUDCD1        | 1 | chr8  |
| PNKD          | 1 | chr2  |
| FGF13         | 1 | chrX  |
| TUB           | 1 | chr11 |



|          |   |       |
|----------|---|-------|
| CHP1     | 1 | chr15 |
| SGCZ     | 1 | chr8  |
| HOXB1    | 1 | chr17 |
| UGT1A6   | 1 | chr2  |
| TBC1D16  | 1 | chr17 |
| ARRDC4   | 1 | chr15 |
| SMIM4    | 1 | chr3  |
| TMC4     | 1 | chr19 |
| RNF26    | 1 | chr11 |
| FGGY     | 1 | chr1  |
| CCDC109B | 1 | chr4  |
| GPSM1    | 1 | chr9  |
| RPS6KA1  | 1 | chr1  |
| CCM2     | 1 | chr7  |
| PPIL6    | 1 | chr6  |
| TWSG1    | 1 | chr18 |
| CACNA2D1 | 1 | chr7  |
| MIDN     | 1 | chr19 |
| FLG      | 1 | chr1  |
| NTSR1    | 1 | chr20 |
| GLRA1    | 1 | chr5  |
| MYH10    | 1 | chr17 |
| ZNF529   | 1 | chr19 |
| NRXN3    | 1 | chr14 |
| FAM47E   | 1 | chr4  |
| BTBD2    | 1 | chr19 |
| EIF4A3   | 1 | chr17 |
| LHX3     | 1 | chr9  |
| CIB1     | 1 | chr15 |
| IL12RB1  | 1 | chr19 |
| RAB3IL1  | 1 | chr11 |
| HOXB-AS3 | 1 | chr17 |
| MKLN1    | 1 | chr7  |
| GATAD2A  | 1 | chr19 |
| IGF1R    | 1 | chr15 |
| KCNQ1    | 1 | chr11 |
| NR5A1    | 1 | chr9  |
| C16orf45 | 1 | chr16 |
| C9orf171 | 1 | chr9  |
| MSI2     | 1 | chr17 |
| ABCA1    | 1 | chr9  |
| LHPP     | 1 | chr10 |
| RRP7A    | 1 | chr22 |
| ZNF236   | 1 | chr18 |
| DKK3     | 1 | chr11 |
| TECR     | 1 | chr19 |

|               |   |       |
|---------------|---|-------|
| PDE6C         | 1 | chr10 |
| FUT3          | 1 | chr19 |
| NECAB2        | 1 | chr16 |
| PGP           | 1 | chr16 |
| DDX3X         | 1 | chrX  |
| CADM2         | 1 | chr3  |
| LOC642852     | 1 | chr21 |
| MROH1         | 1 | chr8  |
| MSRA          | 1 | chr8  |
| ZNF708        | 1 | chr19 |
| ADARB2-AS1    | 1 | chr10 |
| PACRG         | 1 | chr6  |
| RNU6-19       | 1 | chr12 |
| KIRREL        | 1 | chr1  |
| BMF           | 1 | chr15 |
| KCNAB2        | 1 | chr1  |
| GABRD         | 1 | chr1  |
| FRRS1L        | 1 | chr9  |
| EYS           | 1 | chr6  |
| IFFO2         | 1 | chr1  |
| UGT1A5        | 1 | chr2  |
| ATP9A         | 1 | chr20 |
| BGN           | 1 | chrX  |
| FAM19A2       | 1 | chr12 |
| FOXO1         | 1 | chr13 |
| FILIP1        | 1 | chr6  |
| ATP6V1G2-DDX1 | 1 | chr6  |
| NKAIN2        | 1 | chr6  |
| LRP1B         | 1 | chr2  |
| CEP72         | 1 | chr5  |
| GRK1          | 1 | chr13 |
| TMED10        | 1 | chr14 |
| FLJ37505      | 1 | chr12 |
| ABR           | 1 | chr17 |
| STK39         | 1 | chr2  |
| KIAA1549L     | 1 | chr11 |
| SLC31A1       | 1 | chr9  |
| LOC285768     | 1 | chr6  |
| PFKFB3        | 1 | chr10 |
| RGS7          | 1 | chr1  |
| BANF2         | 1 | chr20 |
| LOC643339     | 1 | chr12 |
| WDR5          | 1 | chr9  |
| TMEM41B       | 1 | chr11 |
| PLIN4         | 1 | chr19 |
| MICAL3        | 1 | chr22 |

|              |   |       |
|--------------|---|-------|
| ADAP1        | 1 | chr7  |
| NPRL3        | 1 | chr16 |
| FADS2        | 1 | chr11 |
| KLHL30       | 1 | chr2  |
| NTSR2        | 1 | chr2  |
| TMEM132C     | 1 | chr12 |
| NR1I2        | 1 | chr3  |
| RELL1        | 1 | chr4  |
| UGT1A7       | 1 | chr2  |
| OXTR         | 1 | chr3  |
| CHMP5        | 1 | chr9  |
| KIAA0586     | 1 | chr14 |
| GRM2         | 1 | chr3  |
| THSD7A       | 1 | chr7  |
| NWD1         | 1 | chr19 |
| KSR2         | 1 | chr12 |
| HIP1         | 1 | chr7  |
| ARHGEF10L    | 1 | chr1  |
| RYR1         | 1 | chr19 |
| MYO3A        | 1 | chr10 |
| CMC1         | 1 | chr3  |
| TCEAL2       | 1 | chrX  |
| TRIM27       | 1 | chr6  |
| CD244        | 1 | chr1  |
| TRAPPC11     | 1 | chr4  |
| INF2         | 1 | chr14 |
| LOC100133050 | 1 | chr5  |
| TSC22D1      | 1 | chr13 |
| SCG5         | 1 | chr15 |
| GLB1L3       | 1 | chr11 |
| LOC644936    | 1 | chr5  |
| HDAC9        | 1 | chr7  |
| LOC401109    | 1 | chr3  |
| NECAB1       | 1 | chr8  |
| CNTRL        | 1 | chr9  |
| MAGEB3       | 1 | chrX  |
| C1QL3        | 1 | chr10 |
| RPSA         | 1 | chr3  |
| GPR143       | 1 | chrX  |
| MAP2K5       | 1 | chr15 |
| ROBO2        | 1 | chr3  |
| RALGDS       | 1 | chr9  |
| DNMT1        | 1 | chr19 |
| HEATR4       | 1 | chr14 |
| TRAPPC6A     | 1 | chr19 |
| KIAA0226     | 1 | chr3  |

|          |   |       |
|----------|---|-------|
| FAM135B  | 1 | chr8  |
| SLC22A23 | 1 | chr6  |
| COPS4    | 1 | chr4  |
| PNPLA3   | 1 | chr22 |
| PDZD2    | 1 | chr5  |
| MUC5B    | 1 | chr11 |
| PARD6G   | 1 | chr18 |
| KIAA1217 | 1 | chr10 |
| SH2D3C   | 1 | chr9  |
| PCDHB15  | 1 | chr5  |
| SYT1     | 1 | chr12 |
| ATP13A2  | 1 | chr1  |
| ZNF787   | 1 | chr19 |
| TMC7     | 1 | chr16 |
| TENM2    | 1 | chr5  |
| TESC     | 1 | chr12 |
| SPECC1   | 1 | chr17 |
| CLEC18B  | 1 | chr16 |
| SH3PXD2A | 1 | chr10 |
| ATG14    | 1 | chr14 |
| KDEL3    | 1 | chr22 |
| PIGN     | 1 | chr18 |
| HPN      | 1 | chr19 |
| ARSG     | 1 | chr17 |
| TBCE     | 1 | chr1  |
| GCH1     | 1 | chr14 |
| DYSF     | 1 | chr2  |
| MYO10    | 1 | chr5  |
| DGKE     | 1 | chr17 |
| RNF149   | 1 | chr2  |
| PRKCA    | 1 | chr17 |
| DNAH17   | 1 | chr17 |
| KCNN3    | 1 | chr1  |
| CD38     | 1 | chr4  |
| ELMO1    | 1 | chr7  |
| SF3B3    | 1 | chr16 |
| EVI5L    | 1 | chr19 |
| JAKMIP1  | 1 | chr4  |
| APBA2    | 1 | chr15 |
| CACNA1D  | 1 | chr3  |
| HOXD10   | 1 | chr2  |
| GALNT9   | 1 | chr12 |
| PLEKHN1  | 1 | chr1  |
| TMEM8B   | 1 | chr9  |
| CPA3     | 1 | chr3  |
| TLX3     | 1 | chr5  |

|               |   |       |
|---------------|---|-------|
| AKR1E2        | 1 | chr10 |
| KIFC2         | 1 | chr8  |
| SDCCAG8       | 1 | chr1  |
| EEF1E1-MUTEC1 | 1 | chr6  |
| LRP2          | 1 | chr2  |
| AIG1          | 1 | chr6  |
| PTGES         | 1 | chr9  |
| UNC5D         | 1 | chr8  |
| FAM115A       | 1 | chr7  |
| ZBTB11        | 1 | chr3  |
| CDK11B        | 1 | chr1  |
| SLC29A1       | 1 | chr6  |
| AGAP1         | 1 | chr2  |
| MRTO4         | 1 | chr1  |
| ALS2CR11      | 1 | chr2  |
| PHIP          | 1 | chr6  |
| LONRF3        | 1 | chrX  |
| ZNF738        | 1 | chr19 |
| SLC24A3       | 1 | chr20 |
| MYO9B         | 1 | chr19 |
| RAP1GAP2      | 1 | chr17 |
| CASZ1         | 1 | chr1  |
| CACNA1I       | 1 | chr22 |
| LOC100286922  | 1 | chr2  |
| CPN2          | 1 | chr3  |
| SLC7A9        | 1 | chr19 |
| SENP6         | 1 | chr6  |
| STEAP3        | 1 | chr2  |
| STMN3         | 1 | chr20 |
| CBFA2T3       | 1 | chr16 |
| MAPK8IP1      | 1 | chr11 |
| FAM219A       | 1 | chr9  |
| THOC5         | 1 | chr22 |
| GLI2          | 1 | chr2  |
| SLC14A2       | 1 | chr18 |
| ACTR1A        | 1 | chr10 |
| EGFLAM        | 1 | chr5  |
| KDM4C         | 1 | chr9  |
| RPL23AP53     | 1 | chr8  |
| CACNA1B       | 1 | chr9  |
| PRR5          | 1 | chr22 |
| GSE1          | 1 | chr16 |
| NGEF          | 1 | chr2  |
| MEF2BNB       | 1 | chr19 |
| CUBN          | 1 | chr10 |
| DGKD          | 1 | chr2  |

|              |   |       |
|--------------|---|-------|
| MYT1L        | 1 | chr2  |
| FAM189A2     | 1 | chr9  |
| HYLS1        | 1 | chr11 |
| DMRT2        | 1 | chr9  |
| ACACB        | 1 | chr12 |
| PDE3A        | 1 | chr12 |
| PRKAR1B      | 1 | chr7  |
| C7orf50      | 1 | chr7  |
| SORBS2       | 1 | chr4  |
| FRMD4A       | 1 | chr10 |
| KREMEN1      | 1 | chr22 |
| GPR123       | 1 | chr10 |
| GRIK4        | 1 | chr11 |
| TBATA        | 1 | chr10 |
| LARGE        | 1 | chr22 |
| FSTL4        | 1 | chr5  |
| TRIM71       | 1 | chr3  |
| MAEA         | 1 | chr4  |
| WDR93        | 1 | chr15 |
| CPXM2        | 1 | chr10 |
| ZFP82        | 1 | chr19 |
| ACOT7        | 1 | chr1  |
| DOC2B        | 1 | chr17 |
| ITPK1        | 1 | chr14 |
| LOC643542    | 1 | chr18 |
| DTNB         | 1 | chr2  |
| ISY1-RAB43   | 1 | chr3  |
| PGBD5        | 1 | chr1  |
| ZNF500       | 1 | chr16 |
| C15orf55     | 1 | chr15 |
| ARAP1        | 1 | chr11 |
| SCRIB        | 1 | chr8  |
| ADD1         | 1 | chr4  |
| TSPAN11      | 1 | chr12 |
| PSD2         | 1 | chr5  |
| STK32B       | 1 | chr4  |
| KHSRP        | 1 | chr19 |
| CREBL2       | 1 | chr12 |
| SH2B2        | 1 | chr7  |
| CDH22        | 1 | chr20 |
| NACAD        | 1 | chr7  |
| OPA3         | 1 | chr19 |
| TMEM72-AS1   | 1 | chr10 |
| LOC100128675 | 1 | chr19 |
| BAZ1A        | 1 | chr14 |
| CLPTM1L      | 1 | chr5  |

|              |   |       |
|--------------|---|-------|
| WDR11-AS1    | 1 | chr10 |
| CNTNAP5      | 1 | chr2  |
| SLC2A13      | 1 | chr12 |
| CYTH4        | 1 | chr22 |
| PI4KA        | 1 | chr22 |
| TM7SF3       | 1 | chr12 |
| PGAP2        | 1 | chr11 |
| CDR2L        | 1 | chr17 |
| MYO1F        | 1 | chr19 |
| ITIH5        | 1 | chr10 |
| PCGF3        | 1 | chr4  |
| AKR7L        | 1 | chr1  |
| KCNT1        | 1 | chr9  |
| BRSK2        | 1 | chr11 |
| SLC1A6       | 1 | chr19 |
| MEF2D        | 1 | chr1  |
| WDR27        | 1 | chr6  |
| ZNF664-FAM10 | 1 | chr12 |
| PFKL         | 1 | chr21 |
| PHACTR3      | 1 | chr20 |
| ACTRT2       | 1 | chr1  |
| TRDMT1       | 1 | chr10 |
| CECR6        | 1 | chr22 |
| TAOK1        | 1 | chr17 |
| ATP6V0A2     | 1 | chr12 |
| PLLP         | 1 | chr16 |
| COA1         | 1 | chr7  |
| NFAT5        | 1 | chr16 |
| CXCL14       | 1 | chr5  |
| MCAT         | 1 | chr22 |
| TSPEAR       | 1 | chr21 |
| FAR1         | 1 | chr11 |
| PPP5D1       | 1 | chr19 |
| SERPINF2     | 1 | chr17 |
| VPS26A       | 1 | chr10 |
| GPR144       | 1 | chr9  |
| TP53I3       | 1 | chr2  |
| DCDC2        | 1 | chr6  |
| NUBP2        | 1 | chr16 |
| PCSK6        | 1 | chr15 |
| LSAMP        | 1 | chr3  |
| ADAMTS20     | 1 | chr12 |
| TMEM201      | 1 | chr1  |
| FBRSL1       | 1 | chr12 |
| PMEPA1       | 1 | chr20 |
| FLJ39080     | 1 | chr8  |

|              |   |       |
|--------------|---|-------|
| COL25A1      | 1 | chr4  |
| BFSP2        | 1 | chr3  |
| ABCC1        | 1 | chr16 |
| MRGPRX2      | 1 | chr11 |
| CYB5A        | 1 | chr18 |
| RUNX1        | 1 | chr21 |
| LRRC15       | 1 | chr3  |
| PHF17        | 1 | chr4  |
| RNF130       | 1 | chr5  |
| TMC5         | 1 | chr16 |
| TACC3        | 1 | chr4  |
| RADIL        | 1 | chr7  |
| XG           | 1 | chrX  |
| BDH1         | 1 | chr3  |
| IFNAR1       | 1 | chr21 |
| GTF2IRD1P1   | 1 | chr7  |
| PDE6B        | 1 | chr4  |
| RAPGEF3      | 1 | chr12 |
| STK40        | 1 | chr1  |
| COLEC11      | 1 | chr2  |
| UGT1A3       | 1 | chr2  |
| MORC2-AS1    | 1 | chr22 |
| EIF2AK1      | 1 | chr7  |
| METTL8       | 1 | chr2  |
| NCKAP5       | 1 | chr2  |
| MIR548AI     | 1 | chr14 |
| GOLGB1       | 1 | chr3  |
| JAK3         | 1 | chr19 |
| JARID2       | 1 | chr6  |
| MCHR2        | 1 | chr6  |
| OBP2A        | 1 | chr9  |
| NBPF9        | 1 | chr1  |
| RPUSD1       | 1 | chr16 |
| CYFIP1       | 1 | chr15 |
| RTEL1        | 1 | chr20 |
| CDH13        | 1 | chr16 |
| CAND2        | 1 | chr3  |
| ADARB2       | 1 | chr10 |
| TBC1D20      | 1 | chr20 |
| METAP1D      | 1 | chr2  |
| HCN1         | 1 | chr5  |
| USP13        | 1 | chr3  |
| RXRA         | 1 | chr9  |
| HIBCH        | 1 | chr2  |
| LOC100009676 | 1 | chr3  |
| CNRIP1       | 1 | chr2  |



|              |   |       |
|--------------|---|-------|
| HRNR         | 1 | chr1  |
| PXDN         | 1 | chr2  |
| LAMA4        | 1 | chr6  |
| GMDS         | 1 | chr6  |
| RBM47        | 1 | chr4  |
| TNFRSF9      | 1 | chr1  |
| NUP210       | 1 | chr3  |
| GDPD4        | 1 | chr11 |
| SVIL         | 1 | chr10 |
| ZFH3         | 1 | chr16 |
| SSX6         | 1 | chrX  |
| UGT1A8       | 1 | chr2  |
| BAI1         | 1 | chr8  |
| CMPK1        | 1 | chr1  |
| SIX2         | 1 | chr2  |
| PHACTR4      | 1 | chr1  |
| WNK2         | 1 | chr9  |
| ZNF385B      | 1 | chr2  |
| GRIK2        | 1 | chr6  |
| LOC100507489 | 1 | chr6  |
| FGF2         | 1 | chr4  |
| FECH         | 1 | chr18 |
| DDX39B       | 1 | chr6  |
| YIPF4        | 1 | chr2  |
| ACYP1        | 1 | chr14 |
| RSBN1L-AS1   | 1 | chr7  |
| CDHR2        | 1 | chr5  |
| PTCHD2       | 1 | chr1  |
| AKT1         | 1 | chr14 |
| MAGI1        | 1 | chr3  |
| UGT1A4       | 1 | chr2  |
| MIR548AN     | 1 | chr13 |
| FLNC         | 1 | chr7  |
| IRF4         | 1 | chr6  |
| RET          | 1 | chr10 |
| SLC39A11     | 1 | chr17 |
| LRRTM4       | 1 | chr2  |
| BEND2        | 1 | chrX  |
| CTNND2       | 1 | chr5  |
| LINC00290    | 1 | chr4  |
| RBM20        | 1 | chr10 |
| UBR3         | 1 | chr2  |
| KIAA1211L    | 1 | chr2  |
| CDRT1        | 1 | chr17 |
| SLC6A19      | 1 | chr5  |
| OPCML        | 1 | chr11 |

|               |   |       |
|---------------|---|-------|
| EBF4          | 1 | chr20 |
| FGFR4         | 1 | chr5  |
| ZNF550        | 1 | chr19 |
| DOCK4         | 1 | chr7  |
| LIN54         | 1 | chr4  |
| NXN           | 1 | chr17 |
| EIF4G3        | 1 | chr1  |
| TMEM104       | 1 | chr17 |
| CDK16         | 1 | chrX  |
| LPIN1         | 1 | chr2  |
| ARHGEF18      | 1 | chr19 |
| AGPS          | 1 | chr2  |
| LSM12         | 1 | chr17 |
| ZFYVE1        | 1 | chr14 |
| CAMK1D        | 1 | chr10 |
| LHX9          | 1 | chr1  |
| VPS54         | 1 | chr2  |
| SKI           | 1 | chr1  |
| CHST8         | 1 | chr19 |
| EML1          | 1 | chr14 |
| NELFB         | 1 | chr9  |
| MMAB          | 1 | chr12 |
| THRB          | 1 | chr3  |
| EXD1          | 1 | chr15 |
| BLOC1S5-TXNC1 | 1 | chr6  |
| ALDH3B2       | 1 | chr11 |
| ANAPC2        | 1 | chr9  |
| RIN2          | 1 | chr20 |
| PI4KAP1       | 1 | chr22 |
| RNU6-71       | 1 | chr6  |
| FOXE1         | 1 | chr9  |
| CAPN2         | 1 | chr1  |
| WISP1         | 1 | chr8  |
| KLHDC4        | 1 | chr16 |
| FAM179A       | 1 | chr2  |
| IGF2BP2       | 1 | chr3  |
| EP400         | 1 | chr12 |
| BAIAP2L2      | 1 | chr22 |
| EHMT1         | 1 | chr9  |
| USP8          | 1 | chr15 |
| CELF4         | 1 | chr18 |
| LOC440704     | 1 | chr1  |
| TMEM249       | 1 | chr8  |
| SARS2         | 1 | chr19 |
| MAGEA4        | 1 | chrX  |
| LPHN1         | 1 | chr19 |

|              |   |       |
|--------------|---|-------|
| COL6A2       | 1 | chr21 |
| DDX1         | 1 | chr2  |
| PLA2G4E      | 1 | chr15 |
| CDH8         | 1 | chr16 |
| SLC12A3      | 1 | chr16 |
| RASA3        | 1 | chr13 |
| CRLF1        | 1 | chr19 |
| SLC27A1      | 1 | chr19 |
| ZNF275       | 1 | chrX  |
| DIAPH2       | 1 | chrX  |
| KIAA0556     | 1 | chr16 |
| LOC100133612 | 1 | chr1  |
| PCDHB14      | 1 | chr5  |
| CCND3        | 1 | chr6  |
| TSPO         | 1 | chr22 |
| NAGPA-AS1    | 1 | chr16 |
| CLCN4        | 1 | chrX  |
| SCAMP4       | 1 | chr19 |
| LOC283177    | 1 | chr11 |
| SH3BP2       | 1 | chr4  |
| ZCCHC10      | 1 | chr5  |
| MIR548AO     | 1 | chr5  |
| MGAT4C       | 1 | chr12 |
| KIF1A        | 1 | chr2  |
| XKR6         | 1 | chr8  |
| ATXN1        | 1 | chr6  |
| DDX6         | 1 | chr11 |
| FAM46C       | 1 | chr1  |
| LOC440970    | 1 | chr3  |
| LARS         | 1 | chr5  |
| EML2         | 1 | chr19 |
| SBSN         | 1 | chr19 |
| PRKD1        | 1 | chr14 |
| GLDC         | 1 | chr9  |
| PIH1D3       | 1 | chrX  |
| CTNNA2       | 1 | chr2  |
| TBC1D14      | 1 | chr4  |
| C14orf159    | 1 | chr14 |
| SMPD3        | 1 | chr16 |
| HHIPL2       | 1 | chr1  |
| TRIM36       | 1 | chr5  |
| ATMIN        | 1 | chr16 |
| AUTS2        | 1 | chr7  |
| RBFOX1       | 1 | chr16 |
| CHODL        | 1 | chr21 |
| KCNMB2       | 1 | chr3  |

|              |   |       |
|--------------|---|-------|
| NOS1         | 1 | chr12 |
| SLC24A4      | 1 | chr14 |
| TRIM43B      | 1 | chr2  |
| RNF165       | 1 | chr18 |
| ERC1         | 1 | chr12 |
| APAF1        | 1 | chr12 |
| RTL1         | 1 | chr14 |
| RAB40C       | 1 | chr16 |
| NKX6-2       | 1 | chr10 |
| NAV2         | 1 | chr11 |
| SERPINH1     | 1 | chr11 |
| REXO1        | 1 | chr19 |
| FBXW8        | 1 | chr12 |
| SLC29A4      | 1 | chr7  |
| TNFRSF8      | 1 | chr1  |
| CACNA1A      | 1 | chr19 |
| BLOC1S5      | 1 | chr6  |
| LOC285441    | 1 | chr4  |
| PACSIN2      | 1 | chr22 |
| RNF10        | 1 | chr12 |
| LOC100271702 | 1 | chr12 |
| GALNT7       | 1 | chr4  |
| BAI3         | 1 | chr6  |
| HIVEP2       | 1 | chr6  |
| ZNF138       | 1 | chr7  |
| SORCS3       | 1 | chr10 |
| UGT1A9       | 1 | chr2  |
| CHTF18       | 1 | chr16 |
| HOXB6        | 1 | chr17 |
| MUM1         | 1 | chr19 |
| ZFPM2        | 1 | chr8  |
| ZNFX1        | 1 | chr20 |
| CARD9        | 1 | chr9  |
| SMAD6        | 1 | chr15 |
| ASCL3        | 1 | chr11 |
| RNU6-81      | 1 | chr2  |
| CDKL2        | 1 | chr4  |
| ANGPT2       | 1 | chr8  |
| UBASH3B      | 1 | chr11 |
| JMJD1C       | 1 | chr10 |
| DNAJC5G      | 1 | chr2  |
| SLC7A5       | 1 | chr16 |
| TYW1         | 1 | chr7  |
| POLA2        | 1 | chr11 |
| CAB39L       | 1 | chr13 |
| TRPC6        | 1 | chr11 |

|           |   |       |
|-----------|---|-------|
| KRTAP10-2 | 1 | chr21 |
| EGFEM1P   | 1 | chr3  |
| RAB43     | 1 | chr3  |
| ASB13     | 1 | chr10 |
| AGRN      | 1 | chr1  |
| PLXDC1    | 1 | chr17 |
| HK1       | 1 | chr10 |
| ROR2      | 1 | chr9  |
| TMEM181   | 1 | chr6  |
| BCL11A    | 1 | chr2  |
| EXOC3     | 1 | chr5  |
| MCM6      | 1 | chr2  |
| VASH1     | 1 | chr14 |
| PRKAG2    | 1 | chr7  |
| TNN       | 1 | chr1  |
| DACH2     | 1 | chrX  |
| FSTL5     | 1 | chr4  |
| AFMID     | 1 | chr17 |
| RGS3      | 1 | chr9  |
| EFCC1     | 1 | chr3  |
| PODN      | 1 | chr1  |
| APOBEC3F  | 1 | chr22 |
| C2orf83   | 1 | chr2  |
| TCEAL6    | 1 | chrX  |
| KIAA1210  | 1 | chrX  |
| SLC12A7   | 1 | chr5  |
| RAB20     | 1 | chr13 |
| FCHO1     | 1 | chr19 |
| SPAST     | 1 | chr2  |
| MCF2L     | 1 | chr13 |
| CRAT      | 1 | chr9  |
| KIAA1671  | 1 | chr22 |
| GSG1      | 1 | chr12 |
| SLIT1     | 1 | chr10 |
| TOPAZ1    | 1 | chr3  |
| SIPA1L3   | 1 | chr19 |
| KCNMA1    | 1 | chr10 |
| NKAIN4    | 1 | chr20 |
| KAT8      | 1 | chr16 |
| PPIL4     | 1 | chr6  |
| ANHX      | 1 | chr12 |
| ANO7      | 1 | chr2  |
| KANSL1    | 1 | chr17 |
| PTPN9     | 1 | chr15 |
| SCFD2     | 1 | chr4  |
| CTBP2     | 1 | chr10 |

|            |   |       |
|------------|---|-------|
| TNPO3      | 1 | chr7  |
| INPP5D     | 1 | chr2  |
| WDR37      | 1 | chr10 |
| LMNB2      | 1 | chr19 |
| PARK2      | 1 | chr6  |
| SEZ6L2     | 1 | chr16 |
| BRAT1      | 1 | chr7  |
| SYTL3      | 1 | chr6  |
| ESR1       | 1 | chr6  |
| GAS7       | 1 | chr17 |
| GLTPD1     | 1 | chr1  |
| MAP3K12    | 1 | chr12 |
| TBL1XR1    | 1 | chr3  |
| PPFIA3     | 1 | chr19 |
| AGBL4      | 1 | chr1  |
| WDR7       | 1 | chr18 |
| NEU4       | 1 | chr2  |
| KCND3      | 1 | chr1  |
| NFIC       | 1 | chr19 |
| FAM19A4    | 1 | chr3  |
| WDR24      | 1 | chr16 |
| LONRF2     | 1 | chr2  |
| CD33       | 1 | chr19 |
| SYT6       | 1 | chr1  |
| RIBC2      | 1 | chr22 |
| SPSB1      | 1 | chr1  |
| RTN4R      | 1 | chr22 |
| LRRC43     | 1 | chr12 |
| AFAP1      | 1 | chr4  |
| KLHL29     | 1 | chr2  |
| ERGIC1     | 1 | chr5  |
| LCT        | 1 | chr2  |
| HTT        | 1 | chr4  |
| TMF1       | 1 | chr3  |
| SGSM1      | 1 | chr22 |
| PLA2G3     | 1 | chr22 |
| ZNF710     | 1 | chr15 |
| SLC9C1     | 1 | chr3  |
| ZNF454     | 1 | chr5  |
| STARD4-AS1 | 1 | chr5  |
| VPS53      | 1 | chr17 |
| LOC389634  | 1 | chr12 |
| APOC1      | 1 | chr19 |
| TENM1      | 1 | chrX  |
| CEP112     | 1 | chr17 |
| PARVB      | 1 | chr22 |

|               |   |       |
|---------------|---|-------|
| EPHB6         | 1 | chr7  |
| C1orf151-NBL1 | 1 | chr1  |
| PLEC          | 1 | chr8  |
| DHX37         | 1 | chr12 |
| NALCN-AS1     | 1 | chr13 |
| POU4F2        | 1 | chr4  |
| EPB41         | 1 | chr1  |
| DGKQ          | 1 | chr4  |
| FLRT1         | 1 | chr11 |
| C14orf169     | 1 | chr14 |
| PPARD         | 1 | chr6  |
| GAK           | 1 | chr4  |
| MAP2K7        | 1 | chr19 |
| SGK1          | 1 | chr6  |
| PRR24         | 1 | chr19 |
| TUBA8         | 1 | chr22 |
| HS3ST4        | 1 | chr16 |
| CUL4A         | 1 | chr13 |
| MIR5009       | 1 | chr21 |
| PBRM1         | 1 | chr3  |
| C15orf27      | 1 | chr15 |
| QSOX2         | 1 | chr9  |
| CCL25         | 1 | chr19 |
| TP53I13       | 1 | chr17 |
| MEF2BNB-MEF2B | 1 | chr19 |
| SMPD4         | 1 | chr2  |
| NFASC         | 1 | chr1  |
| RGS10         | 1 | chr10 |
| PARD6G-AS1    | 1 | chr18 |
| MLLT10        | 1 | chr10 |
| WDR1          | 1 | chr4  |
| LANCL2        | 1 | chr7  |
| SEZ6L         | 1 | chr22 |
| DAPK1         | 1 | chr9  |
| DENND6A       | 1 | chr3  |
| PLXNC1        | 1 | chr12 |
| KLHL26        | 1 | chr19 |
| NKX6-1        | 1 | chr4  |
| OPRD1         | 1 | chr1  |
| BRI3          | 1 | chr7  |
| ZNF493        | 1 | chr19 |
| SNX24         | 1 | chr5  |
| MDGA1         | 1 | chr6  |
| UGT1A10       | 1 | chr2  |
| CT49          | 1 | chr5  |
| MYBBP1A       | 1 | chr17 |

|          |   |       |
|----------|---|-------|
| TFAP4    | 1 | chr16 |
| GNG7     | 1 | chr19 |
| PPFIA1   | 1 | chr11 |
| ADAMTS16 | 1 | chr5  |
| ARVCF    | 1 | chr22 |
| ILF3     | 1 | chr19 |
| RDH13    | 1 | chr19 |
| COL9A3   | 1 | chr20 |
| MYCBPAP  | 1 | chr17 |
| SCML4    | 1 | chr6  |
| NAPA     | 1 | chr19 |
| CRISPLD2 | 1 | chr16 |
| NR2F1    | 1 | chr5  |
| LY86-AS1 | 1 | chr6  |
| RAB35    | 1 | chr12 |
| PIP5K1C  | 1 | chr19 |
| DPP10    | 1 | chr2  |
| FAM20B   | 1 | chr1  |
| KIAA1751 | 1 | chr1  |
| GPC6     | 1 | chr13 |
| RPS6KA2  | 1 | chr6  |
| CARD14   | 1 | chr17 |
| TMEM182  | 1 | chr2  |
| PALLD    | 1 | chr4  |
| GALK2    | 1 | chr15 |
| CD9      | 1 | chr12 |
| ZNF565   | 1 | chr19 |
| ZMAT3    | 1 | chr3  |
| INADL    | 1 | chr1  |
| ZNF154   | 1 | chr19 |
| SLC7A7   | 1 | chr14 |
| LINGO2   | 1 | chr9  |



**site locations**

80885897,80885901,80885910,80885924,80885930,80885933,80885952,80885  
101118167,101118178,101118180,101118182,101118205,101118216,1011182  
157454478,157568353,157594746,157605618,157606110,157793222,1578911  
1784819,1786170,1786179,1786181,1786188,1786193,1786217  
241497322,241497366,241497368,241497374,241497379,241497398,2414974  
59872365,59897399,60055530,60097932,60422230,60432232  
47581364,47581388,47581391,47581412,47581540,47581702  
3032863,3032879,3032930,3032939,3128448,3239848  
53742676,53742679,53742681,53742700,53742736,53742740  
128987146,128987362,128987417,128987424,128987921,129018407  
36049571,36049594,36049601,36049604,36049618  
952281,963102,963335,968450,1012567  
77202644,77202645,77220878,77221799,77246977  
36049571,36049594,36049601,36049604,36049618  
36049571,36049594,36049601,36049604,36049618  
133420273,133428241,133452074,133453540,133456221  
149462706,149462746,149462752,149462786,149462789  
7203405,7306844,7351443,7430418,7738401  
3053365,3053685,3053761,3053762  
160102680,160102724,160102725,160102738  
79034649,79042974,79063592,79069122  
133351029,133365918,133366240,133373503  
39577117,39577199,39591536,39683297  
22541902,22541912,22541914,22541971  
77202644,77202645,77220878,77221799  
3850388,3850447,3850457,3850459  
3350740,3620826,4501349,4656635  
39753991,39753998,39754000,39754031  
100621403,100621408,100621410,100621419  
580997,655106,736017,736018  
44686590,44686616,44686619,44686635  
45142779,45160148,45160245,45172377  
70391024,70425842,70425843,70566956  
6070771,6507637,6769736,7660583  
48931592,49057277,49062539,49062544  
150375271,150410977,150423966,150423967  
3417741,3417752,3457896  
67361019,67361021,67361089  
63269640,63269641,63328784  
130918993,130935502,130968527  
10612073,10631814,10640437  
101771662,101892327,101902605  
240156784,240295801,240295802  
1498403,1505775,1586353  
46771281,46771285,46771293

58560322,58610256,58610257  
50239356,50239403,50239404  
1227719,1252231,1270066  
60926221,60930091,60938308  
136199464,136199465,136199502  
1129439,1129485,1129502  
60097932,60422230,60432232  
126715435,126719831,126719832  
4977744,5055995,5142816  
31505899,31548860,32315683  
245381025,245393901,245715849  
18271709,18273461,18459859  
50256539,50256869,50257380  
649485,658048,686712  
70391024,70425842,70425843  
49022886,49022891,49022902  
76400505,76400506,76414300  
144941419,144946817,144946818  
49057277,49062539,49062544  
75880423,75893632,75893633  
133365918,133366240,133373503  
27491291,27491302,27491336  
169971406,170010554,170010624  
62037967,62049177,62056325  
85640626,85640697,85640725  
134372679,134372680,134550099  
664082,664322,674370  
37159436,37159441,37159532  
55484293,55494187,55495378  
121088368,121088884  
116086817,116086818  
1962190,1962202  
101654460,101761168  
161575967,161575972  
1443154,1457243  
419921,419974  
33304906,33304907  
183713815,183713816  
3000633,3062322  
533035,533036  
39922108,39933047  
54036817,54036818  
61547236,61547237  
54500231,54500278  
3163652,3172913  
124826676,124995813

10253162,10253312  
56732799,56733571  
812583,812601  
143382143,143396060  
31912609,32094716  
5541655,5544317  
68821860,68853503  
138377842,138377899  
2814581,2829476  
55874300,55874316  
101915394,101924539  
1645478,1663210  
62233645,62243646  
31353414,31353415  
29921210,29921211  
696500,696502  
210152514,210152515  
47407117,47407143  
89169651,89169652  
3767264,3767265  
39883987,39885497  
130982824,131077590  
105170221,105171845  
39120436,39120591  
190352746,190352783  
9855868,9944081  
80728029,80855968  
130842141,130845150  
136308542,136310653  
108370663,108566049  
151731479,151771262  
185037248,185037323  
14759025,14827364  
508293,508326  
101771662,101892327  
18565703,18565704  
5355940,5361230  
1777815,1778321  
157932677,157938466  
136271554,136271612  
5696960,5718258  
1042396,1081678  
206904061,206911227  
681359,681387  
22100962,22100963  
2903751,2903798

36869012,36869013  
35471352,35471353  
41400561,41400562  
433904,433963  
48257325,48257326  
59064634,59064635  
41051019,41087062  
152077845,152343843  
151078775,151078803  
195535322,195535323  
3216288,3268254  
71371473,71499318  
44152488,44152788  
3116362,3116369  
242610500,242612753  
21301178,21330991  
60422230,60432232  
43240355,43242321  
58610256,58610257  
2115162,2190452  
3936650,3982840  
47325314,47364384  
33021466,33021467  
158863757,158896515  
33601000,33655575  
39271537,39271538  
1354210,1374695  
45584540,45587004  
11421381,11421402  
24964457,24964485  
138905214,138974091  
102813414,102813430  
97979532,97979533  
131323099,131323100  
88953887,89038729  
1777815,1778321  
135528434,135528458  
61615095,61712593  
113960177,114019091  
736017,736018  
42069535,42171978  
133601687,133601824  
2041154,2048727  
241387018,241403232  
96580854,96681180  
196596234,196634118

639565,639567  
54036817,54036818  
12946689,12956530  
39496742,39496901  
3101637,3102462  
150194484,150202102  
10465362,10465363  
31090100,31090165  
47508572,47557636  
48339984,48339985  
101001357,101106210  
524881,531139  
47469946,47469947  
8421091,8421092  
128611281,128611282  
22471822,22471823  
113648526,113743501  
45339200,45339208  
111039356,111134778  
63824364,63885704  
71505659,71505660  
38467437,38467458  
76862024,76862025  
41042717,41230552  
19573547,19654863  
9449975,9449983  
11759159,11771786  
3428523,3434261  
122527475,122687143  
2522391  
130874245  
3621933  
44770845  
78067456  
48426798  
177808674  
57986974  
201953292  
4622638  
21288836  
22479988  
64904550  
209785204  
15690181  
3533273  
210841736

180638489  
95088562  
62301969  
138831135  
153311755  
135863142  
16624957  
149190403  
73032162  
218802990  
128619357  
6365738  
12156554  
119126778  
188219351  
41804694  
68514554  
20816424  
39983305  
46711447  
175269483  
118844761  
154150241  
1244986  
204219848  
3451152  
102277334  
30646215  
28877304  
85932799  
18384675  
2522391  
12225207  
7593382  
25551130  
74509345  
35084200  
25248474  
111114534  
77513463  
55464790  
53000104  
110343617  
219186591  
138136474  
8088757

41570301  
14661018  
46607884  
234663653  
77943467  
98504130  
52573842  
54671495  
119206373  
59938978  
110600567  
139251480  
26899124  
45068112  
109717108  
9386027  
81802933  
1255252  
152276670  
61340967  
151291266  
8505453  
37035922  
79135938  
77155930  
1987279  
78114653  
139091549  
90776152  
18183527  
61670036  
46674458  
131077590  
19606632  
99206152  
2495420  
127255455  
15584827  
135393863  
55521935  
107677481  
126225822  
42910374  
74574323  
11988839  
14663376

95375286  
5847195  
84030844  
2261683  
41200425  
85593453  
46712803  
145252482  
10278677  
21474934  
1590616  
163501131  
12052231  
158062337  
40391964  
6132067  
1956361  
111926896  
64908195  
19259429  
234663653  
50288630  
152770461  
62541379  
41217203  
76160100  
31502766  
124902355  
142341584  
640726  
114436081  
75639854  
128375623  
935299  
168992803  
33679850  
116011925  
1046952  
6208011  
241350118  
17686898  
93432444  
137005022  
9311701  
4512512  
18459859



944190  
139365  
61609749  
239059723  
11809894  
128853053  
119533732  
37646283  
234663653  
8798585  
33269800  
58914418  
51749946  
11804002  
16843835  
118169150  
75240909  
18006002  
39071020  
26495150  
28296877  
101380947  
28882096  
160829889  
184631918  
105170221  
99715564  
45041118  
32980924  
134162865  
79596274  
18531432  
195877923  
91887876  
123926393  
30250321  
16561939  
39450360  
9733598  
67883998  
77161486  
135991193  
10247268  
73958867  
45671321  
197403563

139164569  
3396490  
83977812  
44340903  
31826929  
1271429  
77918010  
24516752  
130532879  
140625879  
79744327  
17313341  
56621183  
19041180  
167011860  
117491923  
20065618  
74444360  
105584366  
55874093  
38868219  
59803822  
35556122  
66354791  
235600208  
55363590  
71797711  
16679913  
54933103  
101894221  
64479342  
76507053  
154795208  
15779999  
37463048  
70570289  
7920582  
6073246  
29409676  
53769479  
176982491  
132862851  
908413  
35846606  
148595111  
170738824

4887813  
145693366  
243651458  
8053059  
170105268  
143608582  
132514863  
35094602  
143579725  
101393295  
1576635  
44198397  
236679058  
19583733  
202420997  
79701971  
118143818  
21543403  
19222060  
17283402  
2886201  
10828178  
40043664  
234663653  
194063152  
33354403  
76382861  
120012170  
62278385  
88953887  
45923465  
34400580  
29942708  
121634009  
43054466  
104255284  
38462094  
7147974  
179657  
140963179  
45092954  
85681867  
233770144  
19289673  
17032374  
234375976

1845361  
71951803  
125754229  
1053495  
109637186  
20704570  
752407  
1044953  
186697926  
13987404  
29544164  
134912150  
120833072  
72542960  
34060801  
132905627  
32906450  
1316894  
90241316  
125593092  
36893856  
6410580  
14982  
93568151  
65358898  
25638407  
128828168  
230552128  
4811178  
34646987  
72396988  
144890967  
2928995  
31133655  
139196702  
5167650  
6417884  
12771409  
101944107  
44831287  
45122722  
46069034  
45406290  
35556122  
35302603  
1331692

122527475  
124955295  
40171283  
37705562  
21196897  
27138950  
3838571  
72999772  
8631151  
7668224  
741746  
19596138  
138597287  
1435516  
15081665  
156448424  
170060146  
124590414  
45731671  
58406749  
2938265  
17239947  
17600984  
27867867  
124204400  
57312685  
43744893  
69662907  
134914208  
43529312  
45970330  
13695712  
47044588  
1655489  
70910031  
127215342  
24306494  
24301369  
1839022  
101924539  
115928020  
43944909  
9670833  
133118219  
56245312  
75525880

109933638  
133169726  
16162480  
19077804  
71957050  
36321330  
194077617  
129743452  
179395326  
19460424  
1739976  
4857396  
2726162  
197237872  
34711337  
66289040  
649876  
48145152  
36810010  
3648757  
234663653  
31318743  
6094700  
172265745  
134024284  
30119568  
121407725  
17952196  
15497829  
100439409  
138438940  
144615192  
835298  
22896102  
62301969  
83552044  
12861606  
1590616  
432779  
172901511  
45281775  
179390381  
137225217  
191150856  
101397085  
68531801

152187892  
1681482  
112505108  
1708771  
40502160  
7977280  
13367405  
76960225  
29780291  
73001596  
47973422  
234663653  
143593366  
47828187  
45233666  
28756657  
95960469  
180565555  
101891915  
143312216  
123787320  
55235380  
31502766  
32516377  
75528578  
77315620  
176011887  
11579853  
105249322  
65775060  
234663653  
100043086  
128478103  
392482  
43599793  
70738075  
77714227  
18238325  
11739486  
182008236  
112417008  
170698346  
99414823  
15501131  
1213197  
132869536

2686745  
176522651  
58060536  
111565937  
83896149  
743982  
21501749  
72784649  
47086345  
11875366  
7503844  
178331204  
42127570  
73477261  
12584996  
197887473  
64203245  
2214430  
34188708  
100402814  
140160085  
109996343  
24245237  
41521834  
8053059  
67438801  
140080581  
19957998  
20394006  
56142049  
100617711  
223900800  
134230643  
87773917  
29274749  
185449846  
132558689  
38504041  
140589218  
50752566  
34854425  
190675884  
145577616  
39406440  
151087988  
14293718



47546772  
15756328  
42326258  
61774056  
56926792  
114880842  
18706287  
17592756  
152613111  
96798784  
27598105  
3821214  
140605205  
41987787  
43548216  
5089389  
10132822  
1917127  
134341896  
2829476  
132340053  
92923996  
86995793  
241674447  
10910862  
16692260  
118659488  
118168565  
84695352  
145555123  
46138998  
36018946  
30119568  
6624973  
106481008  
79914920  
6971604  
91609532  
68445055  
222704637  
114511548  
81071332  
70189666  
7660583  
19617335  
178294555

117768693  
92857051  
96149356  
43963879  
1421739  
99112078  
101349763  
678430  
134598558  
19882060  
75279846  
1832316  
117465712  
5338900  
12176256  
13371413  
8053059  
187246888  
43274720  
120987390  
2042550  
174136997  
69832026  
143106261  
64285783  
106402969  
234663653  
841965  
46674458  
1370842  
106500939  
47871727  
139262145  
67021945  
8959545  
132222754  
76533216  
6365738  
122543129  
65110530  
27501505  
87871580  
66479905  
65040435  
49947050  
101363172

45970330  
168208448  
128828168  
5683649  
976737  
37265145  
71156732  
94524476  
159045292  
60688991  
449985  
136632902  
77241391  
151390749  
175075817  
85597733  
162554591  
76198457  
116322930  
128750410  
53537264  
39449294  
228491315  
101397198  
118215070  
1103036  
111207612  
17899267  
32297484  
113743501  
131863236  
25448652  
13252806  
98758840  
44283537  
38627237  
79088889  
61876049  
31132332  
149846961  
133812284  
242149071  
44196828  
75778309  
54198305  
126715435

128671100  
233938242  
1151618  
2448661  
161834256  
29896389  
2580913  
159180009  
152343843  
9855868  
1262966  
53885310  
176889359  
49629845  
49540020  
54333582  
242754586  
112525024  
3404316  
68931611  
737791  
100937114  
51728550  
114654852  
45826878  
9414430  
20248390  
122675333  
7812672  
23773445  
172313210  
136575019  
3234979  
69089846  
25228296  
31533965  
90608557  
111903460  
178383952  
110867863  
509519  
8541630  
45421742  
123857691  
63904583  
44540398

142561892  
19964097  
145004544  
125455371  
101608210  
147560155  
29310431  
960712  
63885704  
73958867  
35391786  
844034  
7969900  
134627284  
47778710  
18594073  
26031806  
113906308  
28720328  
52666865  
76496231  
139101706  
8124738  
27899780  
19289673  
130937931  
204907738  
121301386  
77918010  
21883429  
10081200  
55494626  
26604021  
90143574  
57677894  
94620569  
18778690  
85417969  
29190137  
97912126  
21582213  
122249255  
37606303  
234663653  
12722281  
4444163

4314529  
2666007  
70218705  
5232871  
19958667  
10787582  
55558596  
61471745  
48589244  
108099312  
48007096  
84903207  
92923996  
6468440  
120538685  
3656067  
115594262  
179005079  
1887243  
94955326  
166938187  
78164070  
103398554  
169424570  
49458652  
6331427  
36680376  
178750202  
62624261  
58220445  
23254214  
29110581

i953,80885978,80885979,80885980,80885981,80885982,80885983,80885994,808859  
32,101118235,101118240,101118243,101118246,101118248,101118250  
32,158281485,158349807

04

















































395,80885996,80885997,80885999,80886002,80886004,80886023,80886035,808860:

















































38,80886059,80886063,80886070,80886077,80886088,80886098,80886100,8088610

















































12,80886112,80886114,80886126,80886130,80886131,80886142,80886143,80886146















































3,80886147,80886227

| <b>Gene name</b> | <b>number of high covariance sites</b> | <b>chromosome</b> |
|------------------|----------------------------------------|-------------------|
| SORCS2           | 4                                      | chr4              |
| PRKAG2           | 1                                      | chr7              |
| SNTG2            | 1                                      | chr2              |
| SLC6A5           | 1                                      | chr11             |
| PHOSPHO2-KLHL23  | 1                                      | chr2              |
| DPP6             | 1                                      | chr7              |
| GOLGA8A          | 2                                      | chr15             |
| CCDC113          | 4                                      | chr16             |
| RPS6KB1          | 1                                      | chr17             |
| TMEM201          | 1                                      | chr1              |
| NAGPA            | 1                                      | chr16             |
| PEX14            | 2                                      | chr1              |
| PLCL1            | 1                                      | chr2              |
| WDR31            | 2                                      | chr9              |
| MLXIP            | 2                                      | chr12             |
| TMCO3            | 1                                      | chr13             |
| ZFR2             | 1                                      | chr19             |
| WARS2            | 1                                      | chr1              |
| GSTM3            | 1                                      | chr1              |
| FUT10            | 1                                      | chr8              |
| FAM19A5          | 3                                      | chr22             |
| SMURF1           | 1                                      | chr7              |
| NCKAP5           | 1                                      | chr2              |
| SLC25A37         | 1                                      | chr8              |
| CAMK1D           | 1                                      | chr10             |
| SPNS2            | 1                                      | chr17             |
| DLEU7            | 1                                      | chr13             |
| RBM25            | 1                                      | chr14             |
| GPR123           | 1                                      | chr10             |
| NEBL             | 1                                      | chr10             |
| DAPK1            | 1                                      | chr9              |
| USH2A            | 1                                      | chr1              |
| GNB1L            | 2                                      | chr22             |
| LAMC3            | 1                                      | chr9              |
| ZNF236           | 1                                      | chr18             |
| SOLH             | 1                                      | chr16             |
| FES              | 1                                      | chr15             |
| PAPLN            | 2                                      | chr14             |
| TRAF3IP2         | 1                                      | chr6              |
| NEK6             | 1                                      | chr9              |
| LAPTM4B          | 1                                      | chr8              |
| CLIP2            | 1                                      | chr7              |



|             |   |       |
|-------------|---|-------|
| ERLEC1      | 2 | chr2  |
| PPAT        | 1 | chr4  |
| TMC6        | 1 | chr17 |
| SIRT1       | 1 | chr10 |
| LDB3        | 1 | chr10 |
| PCSK2       | 1 | chr20 |
| HID1        | 1 | chr17 |
| CCDC146     | 1 | chr7  |
| PARD3       | 1 | chr10 |
| KIF26B      | 1 | chr1  |
| MINK1       | 1 | chr17 |
| FAM58A      | 1 | chrX  |
| VIPR1       | 1 | chr3  |
| SPI1        | 1 | chr11 |
| SFMBT1      | 1 | chr3  |
| APCDD1L-AS1 | 3 | chr20 |
| FRMD5       | 1 | chr15 |
| LARGE       | 2 | chr22 |
| OCLN        | 1 | chr5  |
| MACROD1     | 2 | chr11 |
| LEPREL1     | 1 | chr3  |
| CRISPLD2    | 2 | chr16 |
| C18orf25    | 1 | chr18 |
| LOXL2       | 1 | chr8  |
| SHB         | 1 | chr9  |
| TBC1D16     | 1 | chr17 |
| KATNB1      | 1 | chr16 |
| AMZ1        | 2 | chr7  |
| LOC642846   | 1 | chr12 |
| CACNA1H     | 1 | chr16 |
| FGGY        | 1 | chr1  |
| RPS6KA1     | 1 | chr1  |
| CAMK2B      | 1 | chr7  |
| CCM2        | 1 | chr7  |
| ZBTB46      | 2 | chr20 |
| ZNF385B     | 1 | chr2  |
| SMAD3       | 1 | chr15 |
| BCAR3       | 1 | chr1  |
| C9orf135    | 1 | chr9  |
| TTLL1       | 1 | chr22 |
| ZNF529      | 1 | chr19 |
| DUSP13      | 1 | chr10 |
| CACNA1I     | 2 | chr22 |

|          |   |       |
|----------|---|-------|
| SNX25    | 1 | chr4  |
| ENTPD6   | 2 | chr20 |
| NNT      | 1 | chr5  |
| B4GALT1  | 2 | chr9  |
| MAN2A2   | 1 | chr15 |
| ACSF3    | 1 | chr16 |
| SLC22A11 | 1 | chr11 |
| MSI2     | 1 | chr17 |
| GPR107   | 1 | chr9  |
| ZDHHC14  | 1 | chr6  |
| LHPP     | 1 | chr10 |
| RRP7A    | 1 | chr22 |
| TGFBR2   | 1 | chr3  |
| RASL12   | 1 | chr15 |
| PDE6C    | 1 | chr10 |
| FILIP1   | 1 | chr6  |
| WNT4     | 1 | chr1  |
| PTK7     | 1 | chr6  |
| RPTOR    | 2 | chr17 |
| FLG      | 2 | chr1  |
| MSRA     | 1 | chr8  |
| KSR2     | 1 | chr12 |
| SOX5     | 1 | chr12 |
| FAN1     | 1 | chr15 |
| COL5A3   | 1 | chr19 |
| FAM213B  | 1 | chr1  |
| ACACB    | 1 | chr12 |
| MRPS35   | 1 | chr12 |
| KAZN     | 1 | chr1  |
| SEZ6L2   | 1 | chr16 |
| TMED10   | 1 | chr14 |
| PKD1L2   | 1 | chr16 |
| MOB2     | 1 | chr11 |
| BDP1     | 1 | chr5  |
| SRCAP    | 1 | chr16 |
| MTMR14   | 1 | chr3  |
| RBL1     | 2 | chr20 |
| WSB2     | 1 | chr12 |
| ITPKB    | 1 | chr1  |
| TP73     | 1 | chr1  |
| TBL1X    | 1 | chrX  |
| TONSL    | 3 | chr8  |
| DNAH8    | 2 | chr6  |

|            |   |       |
|------------|---|-------|
| CDH12      | 1 | chr5  |
| ZMYM5      | 1 | chr13 |
| DNMT1      | 1 | chr19 |
| KIAA0586   | 1 | chr14 |
| PPP1R26    | 1 | chr9  |
| SMARCC1    | 1 | chr3  |
| PIK3C2B    | 1 | chr1  |
| SLC7A9     | 1 | chr19 |
| AXDND1     | 1 | chr1  |
| GRAMD1A    | 1 | chr19 |
| CUEDC1     | 1 | chr17 |
| RBFOX1     | 1 | chr16 |
| SIPA1L3    | 1 | chr19 |
| ZNF467     | 4 | chr7  |
| NGEF       | 1 | chr2  |
| MMEL1      | 1 | chr1  |
| GLB1L3     | 1 | chr11 |
| PACRG-AS1  | 1 | chr6  |
| FIBCD1     | 4 | chr9  |
| LRPAP1     | 1 | chr4  |
| CHD9       | 1 | chr16 |
| ST3GAL3    | 1 | chr1  |
| TBC1D20    | 1 | chr20 |
| SBNO1      | 1 | chr12 |
| RBFOX1     | 3 | chr16 |
| SLC6A12    | 2 | chr12 |
| TSHZ2      | 1 | chr20 |
| C14orf166B | 1 | chr14 |
| COPS4      | 1 | chr4  |
| GALNT9     | 1 | chr12 |
| TRAF3      | 1 | chr14 |
| PTN        | 1 | chr7  |
| ERMAP      | 1 | chr1  |
| TBC1D22A   | 3 | chr22 |
| LRRTM4     | 1 | chr2  |
| CHID1      | 1 | chr11 |
| KIF16B     | 1 | chr20 |
| IL17RE     | 1 | chr3  |
| SAFB2      | 1 | chr19 |
| PRDM6      | 1 | chr5  |
| ITSN1      | 2 | chr21 |
| AK5        | 1 | chr1  |
| GALM       | 1 | chr2  |

|                        |   |       |
|------------------------|---|-------|
| AGPAT4                 | 1 | chr6  |
| ATG14                  | 1 | chr14 |
| PACRG                  | 1 | chr6  |
| DPYS                   | 1 | chr8  |
| SLC25A25               | 2 | chr9  |
| ZBBX                   | 1 | chr3  |
| CYP4Z2P                | 1 | chr1  |
| ATP9B                  | 1 | chr18 |
| LIN54                  | 2 | chr4  |
| C6orf118               | 1 | chr6  |
| FAM86B3P               | 1 | chr8  |
| COL23A1                | 1 | chr5  |
| DTX2P1-UPK3BP1-PMS2P11 | 1 | chr7  |
| FBLN1                  | 3 | chr22 |
| TACC3                  | 2 | chr4  |
| SF3B3                  | 1 | chr16 |
| AFAP1L2                | 1 | chr10 |
| NTNG1                  | 1 | chr1  |
| CUL2                   | 1 | chr10 |
| HSPG2                  | 1 | chr1  |
| YPEL1                  | 1 | chr22 |
| CPQ                    | 1 | chr8  |
| GLTSCR1                | 1 | chr19 |
| DLGAP2                 | 2 | chr8  |
| MORN1                  | 1 | chr1  |
| PRKG1                  | 1 | chr10 |
| TEAD4                  | 1 | chr12 |
| ZNF77                  | 1 | chr19 |
| CACNA2D4               | 1 | chr12 |
| OSBPL5                 | 1 | chr11 |
| EFCAB12                | 1 | chr3  |
| LOC100130855           | 1 | chr15 |
| ATXN3                  | 1 | chr14 |
| AP3M1                  | 2 | chr10 |
| LRCOL1                 | 1 | chr12 |
| CDH6                   | 2 | chr5  |
| PHIP                   | 1 | chr6  |
| METTLL15               | 1 | chr11 |
| CSMD1                  | 1 | chr8  |
| AASDH                  | 2 | chr4  |
| GPHN                   | 2 | chr14 |
| PHF2                   | 1 | chr9  |
| CRELD2                 | 1 | chr22 |

|              |   |       |
|--------------|---|-------|
| ADARB2       | 1 | chr10 |
| MERTK        | 1 | chr2  |
| CEP170B      | 6 | chr14 |
| STEAP3       | 1 | chr2  |
| CDC42BPA     | 1 | chr1  |
| RNU6-66      | 1 | chr19 |
| LOC100873065 | 2 | chrX  |
| CTBP1        | 1 | chr4  |
| CNPY1        | 1 | chr7  |
| SMARCA4      | 1 | chr19 |
| GRK5         | 1 | chr10 |
| LMNA         | 1 | chr1  |
| PTPRN2       | 5 | chr7  |
| SURF6        | 3 | chr9  |
| TBCD         | 1 | chr17 |
| SLC44A1      | 1 | chr9  |
| MCTP1        | 1 | chr5  |
| RAB6B        | 1 | chr3  |
| NUP210       | 1 | chr3  |
| SORBS2       | 1 | chr4  |
| B4GALNT4     | 1 | chr11 |
| VPRBP        | 3 | chr3  |
| PDLIM2       | 3 | chr8  |
| MAEA         | 1 | chr4  |
| UTP6         | 1 | chr17 |
| CPXM2        | 1 | chr10 |
| ZFP82        | 1 | chr19 |
| IFT27        | 1 | chr22 |
| TUFT1        | 1 | chr1  |
| MURC         | 1 | chr9  |
| LINC00674    | 1 | chr17 |
| ARHGAP33     | 1 | chr19 |
| EEF1A2       | 1 | chr20 |
| KLHL29       | 1 | chr2  |
| RNF166       | 1 | chr16 |
| C14orf132    | 1 | chr14 |
| LAMA5        | 2 | chr20 |
| CELF4        | 1 | chr18 |
| CCDC40       | 1 | chr17 |
| RAB11FIP3    | 1 | chr16 |
| SUN1         | 2 | chr7  |
| ZNF284       | 1 | chr19 |
| MAGEE1       | 1 | chrX  |

|                |   |       |
|----------------|---|-------|
| TENM2          | 1 | chr5  |
| EPPK1          | 3 | chr8  |
| TM7SF3         | 1 | chr12 |
| HOTAIR         | 1 | chr12 |
| PFDN1          | 1 | chr5  |
| SYAP1          | 1 | chrX  |
| WDR27          | 1 | chr6  |
| ZNF664-FAM101A | 1 | chr12 |
| XYLT1          | 1 | chr16 |
| JAZF1          | 1 | chr7  |
| IFNL4          | 1 | chr19 |
| SEC16A         | 1 | chr9  |
| STRN4          | 1 | chr19 |
| AGAP1          | 3 | chr2  |
| GPR32          | 1 | chr19 |
| FAM19A5        | 1 | chr22 |
| LOC285577      | 1 | chr5  |
| PPM1L          | 2 | chr3  |
| MOK            | 1 | chr14 |
| LSAMP          | 1 | chr3  |
| FRY            | 1 | chr13 |
| FBXL18         | 1 | chr7  |
| VASH1          | 1 | chr14 |
| GRIN2A         | 1 | chr16 |
| TRAF3IP2-AS1   | 1 | chr6  |
| PHF17          | 1 | chr4  |
| DOCK1          | 2 | chr10 |
| FAM182B        | 1 | chr20 |
| PCDHB19P       | 1 | chr5  |
| CCDC85C        | 3 | chr14 |
| FER1L6         | 1 | chr8  |
| PPP2R5E        | 1 | chr14 |
| MYO9B          | 2 | chr19 |
| RECK           | 1 | chr9  |
| MARK2          | 1 | chr11 |
| RHBDL2         | 1 | chr1  |
| SNX14          | 1 | chr6  |
| ARHGEF4        | 1 | chr2  |
| MYOM2          | 1 | chr8  |
| PCNT           | 1 | chr21 |
| ARSG           | 1 | chr17 |
| RAB43          | 1 | chr3  |
| BNC2           | 1 | chr9  |

|         |   |       |
|---------|---|-------|
| CHP1    | 1 | chr15 |
| CDH4    | 2 | chr20 |
| UBE2U   | 1 | chr1  |
| LIG1    | 1 | chr19 |
| BIRC7   | 1 | chr20 |
| RBFOX3  | 1 | chr17 |
| FLT4    | 1 | chr5  |
| SSTR5   | 3 | chr16 |
| RTEL1   | 1 | chr20 |
| NIPA2   | 1 | chr15 |
| COL11A1 | 1 | chr1  |
| TSNARE1 | 1 | chr8  |
| PDXK    | 3 | chr21 |
| SUMF1   | 1 | chr3  |
| NCOR2   | 2 | chr12 |
| SRGAP1  | 1 | chr12 |
| DLGAP1  | 1 | chr18 |
| ZNF423  | 2 | chr16 |
| COBLL1  | 1 | chr2  |
| FYCO1   | 1 | chr3  |
| SLC27A1 | 2 | chr19 |
| PRELP   | 1 | chr1  |
| RC3H1   | 3 | chr1  |
| SLC1A7  | 1 | chr1  |
| MACF1   | 1 | chr1  |
| POC1B   | 1 | chr12 |
| PDE9A   | 1 | chr21 |
| MECOM   | 1 | chr3  |
| SEMA3D  | 1 | chr7  |
| GPR98   | 1 | chr5  |
| DDX31   | 2 | chr9  |
| SNN     | 1 | chr16 |
| ZMAT5   | 1 | chr22 |
| CDHR2   | 1 | chr5  |
| COL26A1 | 1 | chr7  |
| HPS3    | 1 | chr3  |
| PIGG    | 1 | chr4  |
| RYR1    | 1 | chr19 |
| DOCK8   | 1 | chr9  |
| OTUD7A  | 2 | chr15 |
| ERCC6   | 1 | chr10 |
| ZNF208  | 2 | chr19 |
| CCL25   | 1 | chr19 |

|            |   |       |
|------------|---|-------|
| SCAI       | 1 | chr9  |
| SH3RF3     | 1 | chr2  |
| RGN        | 1 | chrX  |
| HIVEP3     | 2 | chr1  |
| ARAP1      | 1 | chr11 |
| GREM1      | 2 | chr15 |
| ACOX2      | 1 | chr3  |
| LAMA3      | 1 | chr18 |
| ZNF550     | 1 | chr19 |
| ATP11A     | 1 | chr13 |
| EGFR       | 1 | chr7  |
| TMEM104    | 1 | chr17 |
| ASTN2      | 1 | chr9  |
| CDK16      | 1 | chrX  |
| MIR548G    | 2 | chr3  |
| VMP1       | 1 | chr17 |
| TBC1D8     | 1 | chr2  |
| ERMP1      | 1 | chr9  |
| CEP120     | 1 | chr5  |
| CNKSR3     | 1 | chr6  |
| SLC12A3    | 1 | chr16 |
| NELFB      | 1 | chr9  |
| PNPLA1     | 1 | chr6  |
| FZR1       | 2 | chr19 |
| LOC338651  | 1 | chr11 |
| KDM4B      | 3 | chr19 |
| PPP6R3     | 1 | chr11 |
| FLJ22447   | 1 | chr14 |
| CABLES2    | 1 | chr20 |
| EXD3       | 2 | chr9  |
| PI4KAP1    | 1 | chr22 |
| TBL1XR1    | 1 | chr3  |
| UVSSA      | 1 | chr4  |
| USP49      | 1 | chr6  |
| DPYD       | 1 | chr1  |
| DNAL1      | 2 | chr14 |
| POU4F1-AS1 | 1 | chr13 |
| KIAA2022   | 1 | chrX  |
| EPN2       | 1 | chr17 |
| PLEKHH1    | 2 | chr14 |
| SLC16A6    | 1 | chr17 |
| RCOR2      | 1 | chr11 |
| TMEM255B   | 1 | chr13 |



|                |   |       |
|----------------|---|-------|
| TTLL6          | 1 | chr17 |
| DDX1           | 1 | chr2  |
| SPIRE1         | 1 | chr18 |
| KDM6A          | 1 | chrX  |
| RNPEP          | 1 | chr1  |
| TMC2           | 1 | chr20 |
| RTEL1-TNFRSF6B | 1 | chr20 |
| RAB11FIP1      | 1 | chr8  |
| ZNF275         | 1 | chrX  |
| NHSL1          | 1 | chr6  |
| RIN1           | 1 | chr11 |
| SCN5A          | 1 | chr3  |
| MRPL45P2       | 2 | chr17 |
| LOC729732      | 1 | chr8  |
| VAV2           | 1 | chr9  |
| LAMC1          | 1 | chr1  |
| EFCAB6         | 1 | chr22 |
| SCAMP4         | 1 | chr19 |
| PRMT10         | 1 | chr4  |
| GABBR2         | 1 | chr9  |
| KIF1A          | 1 | chr2  |
| TTI2           | 2 | chr8  |
| CDH4           | 6 | chr20 |
| NDUFS4         | 1 | chr5  |
| CTBP2          | 2 | chr10 |
| FAM196A        | 2 | chr10 |
| AGAP1          | 2 | chr2  |
| PPP2R5C        | 1 | chr14 |
| INTS8          | 1 | chr8  |
| GAS7           | 2 | chr17 |
| CHMP6          | 1 | chr17 |
| HHIPL2         | 1 | chr1  |
| KPNA1          | 1 | chr3  |
| RASA3          | 1 | chr13 |
| MCF2L          | 1 | chr13 |
| FAM21A         | 1 | chr10 |
| ITSN1          | 1 | chr21 |
| FGF1           | 1 | chr5  |
| GRIN3A         | 1 | chr9  |
| TPP2           | 1 | chr13 |
| CNN2           | 1 | chr19 |
| MYO7A          | 3 | chr11 |
| FAM86HP        | 2 | chr3  |

|           |   |       |
|-----------|---|-------|
| SDK2      | 2 | chr17 |
| APOBEC3H  | 1 | chr22 |
| CSNK1A1L  | 1 | chr13 |
| CAMTA1    | 1 | chr1  |
| TLL2      | 1 | chr10 |
| ANKRD29   | 1 | chr18 |
| LRP1      | 1 | chr12 |
| EVC2      | 2 | chr4  |
| GAS6      | 1 | chr13 |
| ZFPM2     | 1 | chr8  |
| WBSCR17   | 1 | chr7  |
| ITPK1     | 1 | chr14 |
| CCDC109B  | 1 | chr4  |
| PRKXP1    | 1 | chr15 |
| CUX1      | 1 | chr7  |
| MCOLN1    | 1 | chr19 |
| CUX2      | 1 | chr12 |
| ERCC2     | 1 | chr19 |
| ZFP30     | 1 | chr19 |
| ARHGAP22  | 1 | chr10 |
| CD3G      | 1 | chr11 |
| RTN4      | 1 | chr2  |
| HPD       | 1 | chr12 |
| UBP1      | 1 | chr3  |
| C14orf159 | 1 | chr14 |
| TBX5      | 1 | chr12 |
| KIAA1671  | 2 | chr22 |
| SIK3      | 1 | chr11 |
| ZC3H6     | 1 | chr2  |
| EBF2      | 1 | chr8  |
| SYNM      | 1 | chr15 |
| GYPC      | 1 | chr2  |
| UHRF2     | 1 | chr9  |
| PDSS2     | 1 | chr6  |
| RXRA      | 2 | chr9  |
| FLJ46300  | 1 | chr10 |
| GPR56     | 1 | chr16 |
| ZNF362    | 1 | chr1  |
| PRTG      | 1 | chr15 |
| LONP1     | 1 | chr19 |
| RGS6      | 1 | chr14 |
| TXNRD1    | 2 | chr12 |
| PREX1     | 1 | chr20 |

|            |   |       |
|------------|---|-------|
| GPR75-ASB3 | 2 | chr2  |
| STARD4-AS1 | 1 | chr5  |
| RORA       | 1 | chr15 |
| TRAPPC9    | 1 | chr8  |
| GRWD1      | 1 | chr19 |
| ATP2A3     | 1 | chr17 |
| KATNBL1    | 1 | chr15 |
| SUGP1      | 1 | chr19 |
| PRDM16     | 1 | chr1  |
| SGTA       | 1 | chr19 |
| C1orf86    | 1 | chr1  |
| SCFD2      | 1 | chr4  |
| SYMPK      | 1 | chr19 |
| SHROOM2    | 1 | chrX  |
| ANP32E     | 2 | chr1  |
| CD82       | 1 | chr11 |
| R3HDM4     | 1 | chr19 |
| LAMA1      | 1 | chr18 |
| PXDN       | 2 | chr2  |
| MYO18A     | 1 | chr17 |
| GLTPD1     | 1 | chr1  |
| PIBF1      | 1 | chr13 |
| TNS3       | 2 | chr7  |
| JARID2     | 1 | chr6  |
| PGS1       | 3 | chr17 |
| PPP2R2C    | 1 | chr4  |
| USP15      | 1 | chr12 |
| TPGS1      | 1 | chr19 |
| GCC2       | 1 | chr2  |
| PPCS       | 1 | chr1  |
| MYCBPAP    | 2 | chr17 |
| EPHA3      | 2 | chr3  |
| ARR3       | 2 | chrX  |
| TPPP       | 1 | chr5  |
| AUTS2      | 1 | chr7  |
| AJAP1      | 1 | chr1  |
| SLC35D2    | 1 | chr9  |
| COL8A1     | 2 | chr3  |
| AGT        | 1 | chr1  |
| PIZO1      | 1 | chr16 |
| CRY2       | 1 | chr11 |
| DLGAP1     | 2 | chr18 |
| SYBU       | 1 | chr8  |

|            |   |       |
|------------|---|-------|
| SETBP1     | 1 | chr18 |
| DGKQ       | 1 | chr4  |
| FLRT1      | 1 | chr11 |
| PPARD      | 1 | chr6  |
| CCDC94     | 1 | chr19 |
| SPATA2L    | 1 | chr16 |
| ST6GAL2    | 1 | chr2  |
| SNAPC4     | 1 | chr9  |
| ROBO1      | 1 | chr3  |
| KCNAB1-AS2 | 1 | chr3  |
| COL18A1    | 2 | chr21 |
| DHRS4L1    | 1 | chr14 |
| ZC3HAV1    | 2 | chr7  |
| SCTR       | 1 | chr2  |
| VSX2       | 1 | chr14 |
| KDM2B      | 1 | chr12 |
| NFATC1     | 2 | chr18 |
| PNPLA7     | 2 | chr9  |
| DENND6A    | 1 | chr3  |
| PDZRN3     | 1 | chr3  |
| PEMT       | 1 | chr17 |
| TRPC2      | 1 | chr11 |
| SLC47A1    | 2 | chr17 |
| KIAA1551   | 1 | chr12 |
| UBR1       | 1 | chr15 |
| NXN        | 4 | chr17 |
| CABP7      | 1 | chr22 |
| ISY1-RAB43 | 1 | chr3  |
| C7orf50    | 1 | chr7  |
| ANKMY1     | 6 | chr2  |
| PYGB       | 2 | chr20 |
| TRIO       | 1 | chr5  |
| PODXL      | 1 | chr7  |
| TRAPPC10   | 1 | chr21 |
| OCEL1      | 1 | chr19 |
| CORIN      | 1 | chr4  |
| GPC5       | 2 | chr13 |
| FBXL22     | 1 | chr15 |
| LRIT1      | 1 | chr10 |
| TMEM175    | 1 | chr4  |
| KCNAB1     | 1 | chr3  |
| MEGF6      | 1 | chr1  |
| TMEM51-AS1 | 1 | chr1  |

|        |   |       |
|--------|---|-------|
| RPRD2  | 4 | chr1  |
| TPO    | 1 | chr2  |
| MLLT1  | 2 | chr19 |
| PCNXL2 | 1 | chr1  |

**site locations**

7218745,7218749,7428386,7484966  
151518005  
952271  
20672356  
170580614  
154149462  
34728930,34728972  
58299811,58299812,58299910,58300770  
57986974  
9672089  
5079239  
10620238,10640437  
198820472  
116086817,116086818  
122626379,122626380  
114200379  
3841541  
119594662  
110282391  
33323126  
48958730,48958739,49146358  
98650049  
133541575  
23403376  
12599343  
4419898  
51336091  
73580257  
134942004  
21337794  
90229685  
215867783  
19787307,19796766  
133906248  
74657603  
602593  
91428778  
73720684,73720685  
111901451  
127041643  
98832214  
73752970

54036817,54036818  
57283261  
76118451  
69656328  
88443652  
17461532  
72956122  
76762264  
35084200  
245393901  
4795306  
152859642  
42568439  
47399600  
53000104  
57155391,57155397,57171961  
44305058  
34225416,34285345  
68831858  
63836680,63885704  
189763772  
84903207,84872049  
43766753  
23155335  
37935946  
77943467  
57777008  
2742449,2742484  
9447487  
1254368  
59938978  
26899124  
44277261  
45068112  
62432152,62432177  
180540908  
67409909  
94032576  
72472674  
43457167  
37035922  
76859102  
40082534,40082538

186208714  
25195018,25202891  
43620580  
33132490,33132491  
91459474  
89203992  
64331566  
55521935  
132884828  
157913475  
126225822  
42910374  
30649907  
65347404  
95375286  
76160100  
22456323  
43101270  
78597523,78683458  
152276614,152276670  
10278677  
118311097  
24678571  
31217110  
10090322  
2522390  
109644356  
27867706  
15127628  
29882489  
75639854  
81192339  
1605075  
70793980  
30747191  
9722333  
35661806,35661836  
118477650  
226900342  
3607518  
9480685  
145658369,145658525,145658526  
38803489,38803490



22641335  
20408076  
10258158  
58914418  
138377899  
47813211  
204417023  
33355891  
179336995  
35509160  
56015672  
7013945  
38440492  
149463193,149463218,149463220,149463242  
233770144  
2522390  
134162865  
163731500  
133787347,133794455,133800092,133800093  
3508341  
53350837  
44299780  
432779  
123784929  
6799428,6799461,7013945  
313285,313304  
51602748  
77329076  
83977812  
132898445  
103354182  
136968948  
43296117  
47508572,47320509,47557636  
77714245  
888631  
16534807  
9956277  
5618072  
122430537  
35043780,35246558  
77927325  
38935856

161624564  
55874093  
163731500  
105439493  
130842141,130845150  
166962928  
47311929  
76910759  
83856659,83896149  
165715903  
8094724  
177968359  
76617529  
45978046,45981384,45981447  
1731696,1737403  
70570289  
116080559  
108011588  
35310696  
22168216  
22079226  
97903605  
48192159  
1478277,1496555  
2257490  
53649062  
3147079  
2942171  
1955747  
3140627  
129145448  
63892510  
92562824  
75893632,75893633  
133186770  
31317785,31317788  
79701971  
28301339  
3113336  
57248956,57249091  
67139912,67142112  
96362048  
50318505

1438422  
112770132  
105335048,105337802,105344316,105344603,105344761,105359658  
120012170  
227463696  
46784615  
22527641,22527642  
1222300  
155302486  
11166825  
121213135  
156105927  
157496434,157579942,157818754,158240257,158281485  
136199464,136199465,136199502  
80829706  
108135012  
94580212  
133608347  
13448093  
186697926  
373029  
51531473,51531495,51531517  
22441821,22441851,22441924  
1316894  
30215667  
125593092  
36893856  
37159436  
151550229  
103346178  
66130534  
36276085  
62125889  
23673127  
88763956  
96517838  
60926221,60930091  
34941955  
78032915  
536685  
893295,902764  
44585591  
75649357

166866088  
144941419,144946817,144946818  
27138950  
54362455  
139652104  
16746656  
170060146  
124590414  
17228366  
27895885  
39737861  
139361082  
47225789  
236613477,236944858,236724860  
51274704  
49146358  
3491070  
160672427,160609898  
102733210  
115928020  
32696485  
5544317  
77241355  
10205325  
111901451  
129743452  
128944079,128944080  
25755379  
140621746  
100019739,100020623,100026843  
124922447  
63907397  
17283402,17298891  
36062862  
63627263  
39400107  
86280873  
131749076  
2048994  
47753493  
66282150  
128838228  
16787669

41570301  
60175237,60450432  
64680773  
48645334  
61869501  
77333576  
180043387  
1129461,1129485,1129502  
62301969  
23018551  
103417023  
143373004  
45152879,45157126,45157127  
4480981  
124986517,125032798  
64281902  
3544294  
49544818,49724869  
165567324  
46008789  
17597619,17597680  
203457476  
173944474,173944478,173944511  
53579582  
39803565  
89897387  
44152788  
169362200  
84687730  
89896790  
135488850,135488851  
11764920  
30161133  
176011887  
101120187  
148866434  
531139  
38956838  
274107  
31847859,31877801  
50700334  
22160708,22160709  
8120507

127794978  
110021005  
46948159  
42193273,42193276  
72411996  
33021466,33021467  
58516382  
21526087  
58060536  
113432010  
55136397  
72784649  
119617173  
47086345  
99514627,99376747  
57823683  
101761168  
5817337  
122737256  
154805692  
56947979  
140160085  
36260913  
3526496,3533273  
1605075  
5055995,5081230,5127897  
68231843  
62106264  
60969884  
140262339,140296614  
20394006  
176830177  
1354210  
41817493  
98251544  
74136351,74145938  
78969375  
74102054  
19239431  
68038697,68045840  
66282150  
63680719  
114496429

46872414  
15756328  
12617688  
44770845  
201953292  
2581250  
62301969  
37737033  
152613111  
138745176  
66099987  
38590138  
45565093,45565384  
12507917  
136690328  
183101302  
44039859  
1917127  
148591549  
101226215  
241663687  
33366032,33366043  
59897399,59971800,60055607,60175237,59875598,60450432  
52947803  
126741727,126840272  
128944079,128944080  
236613477,236724860  
102247767  
95845082  
9820694,9820695  
78971536  
222704637  
122181796  
114888534  
113641483  
51834536  
35043780  
141995076  
104481466  
103269465  
1036442  
76862024,76862025,76840405  
129822490,129822550

71387221,71524887  
39496901  
37679533  
7765495  
98131430  
21233958  
57593100  
5570219,5570220  
114555065  
106500939  
71178224  
93413384  
110600567  
101094460  
101464829  
7594158  
111758395  
45858245  
38135045  
49801057  
118219848  
55220020  
122282514  
33474740  
91666017  
114834256  
25426949,25448652  
116730736  
113066405  
25793412  
99656046  
127439661  
6451750  
107759664  
137288499,137308241  
133618368  
57697568  
33743120  
55917965  
5696960  
72796787  
104670845,104670846  
47242311



54036817,54036818  
110867863  
61489619  
140930848  
48950880  
3839683  
34444494  
19390747  
3286078  
2776981  
2128343  
54198305  
46350446  
9880690  
150194484,150202102  
44639920  
902246  
7023986  
1663742,1664033  
27423226  
1262966  
73406357  
47469946,47469947  
15263009  
76386449,76386524,76386538  
6550037  
62782795  
509895  
109066797  
42923485  
48597192,48589244  
89180075,89180077  
69493317,69493318  
664322  
69205759  
4817150  
99094068  
99514627,99376747  
230848701  
88797567  
45878121  
4106009,3544294  
110685597

42296341  
960712  
63885704  
35391786  
4255008  
89764547  
107459431  
139273402  
79444248  
155939304  
46909514,46912946  
24507010  
138731842,138731967  
120251508  
74723439  
121881847  
77246977,77249039  
140414409,140414410  
57677894  
73669104  
17474143  
3649499  
19440536,19440537  
32134240  
43368571  
725432,741559,763518,743920  
30122278  
128838228  
1100693  
241497322,241497366,241497368,241497379,241497398,241497404  
25262289,25274317  
14454982  
131195162  
45443289  
17339225  
47611546  
92638597,93503882  
63892510  
85997810  
943538  
155939304  
3457896  
15445059

150375271,150410977,150423966,150423967  
1482680  
6224779,6224826  
233151171

| <b>Gene name</b> | <b>number of high covariance sites</b> | <b>chromosome</b> |
|------------------|----------------------------------------|-------------------|
| KDM1B            | 1                                      | chr6              |
| GRAMD1A          | 1                                      | chr19             |
| SPTBN4           | 1                                      | chr19             |
| CSNK1G2          | 1                                      | chr19             |
| TMC6             | 1                                      | chr17             |
| CAMTA1           | 1                                      | chr1              |
| ARRB2            | 1                                      | chr17             |
| CCNG1            | 1                                      | chr5              |
| LAMA5            | 1                                      | chr20             |
| BCL2             | 1                                      | chr18             |
| DYSF             | 1                                      | chr2              |
| GNAZ             | 2                                      | chr22             |
| STIM1            | 1                                      | chr11             |
| UBAC1            | 1                                      | chr9              |
| MTRF1L           | 1                                      | chr6              |
| FUT10            | 1                                      | chr8              |
| ARHGAP19-SLIT1   | 2                                      | chr10             |
| MMP25            | 1                                      | chr16             |
| KIAA1609         | 1                                      | chr16             |
| CD97             | 1                                      | chr19             |
| LINC00620        | 1                                      | chr3              |
| TPST2            | 1                                      | chr22             |
| DHTKD1           | 1                                      | chr10             |
| MCF2L            | 2                                      | chr13             |
| KCNJ15           | 1                                      | chr21             |
| TRPM7            | 1                                      | chr15             |
| CCDC85C          | 1                                      | chr14             |
| ZNF812           | 1                                      | chr19             |
| CCDC154          | 1                                      | chr16             |
| DRAM1            | 1                                      | chr12             |
| PCSK6            | 2                                      | chr15             |
| STOX2            | 1                                      | chr4              |
| WDSUB1           | 2                                      | chr2              |
| ZNF213           | 1                                      | chr16             |
| GABRD            | 1                                      | chr1              |
| ELOVL6           | 1                                      | chr4              |
| TSNARE1          | 1                                      | chr8              |
| PRKCZ            | 3                                      | chr1              |
| MLL3             | 1                                      | chr7              |
| PNKD             | 1                                      | chr2              |
| ALPL             | 1                                      | chr1              |
| TUB              | 1                                      | chr11             |

|                |   |       |
|----------------|---|-------|
| CACNA1I        | 1 | chr22 |
| DHX38          | 1 | chr16 |
| UGT1A6         | 1 | chr2  |
| SEC14L5        | 1 | chr16 |
| COL6A1         | 1 | chr21 |
| RAB11B         | 1 | chr19 |
| PRKX           | 2 | chrX  |
| CDK16          | 1 | chrX  |
| FTSJ1          | 1 | chrX  |
| ST3GAL1        | 1 | chr8  |
| TSHZ1          | 1 | chr18 |
| GFRA1          | 1 | chr10 |
| RTDR1          | 2 | chr22 |
| C20orf85       | 2 | chr20 |
| HTRA3          | 1 | chr4  |
| IL12RB1        | 1 | chr19 |
| ZDHHC19        | 1 | chr3  |
| RAB11FIP4      | 1 | chr17 |
| SLITRK2        | 1 | chrX  |
| KCNQ1          | 1 | chr11 |
| RCOR1          | 1 | chr14 |
| PLXNA4         | 1 | chr7  |
| RAB1A          | 1 | chr2  |
| SNX8           | 2 | chr7  |
| SEC14L4        | 1 | chr22 |
| DIP2C          | 1 | chr10 |
| NTN1           | 1 | chr17 |
| CARD11         | 1 | chr7  |
| AP3D1          | 2 | chr19 |
| HRAS           | 1 | chr11 |
| FRRS1L         | 1 | chr9  |
| UGT1A5         | 1 | chr2  |
| NTM            | 1 | chr11 |
| CANX           | 1 | chr5  |
| MAGIX          | 2 | chrX  |
| N4BP3          | 1 | chr5  |
| PPP4R1L        | 1 | chr20 |
| SYNPR          | 3 | chr3  |
| HSPB2-C11orf52 | 1 | chr11 |
| RNGTT          | 1 | chr6  |
| ZFR2           | 1 | chr19 |
| DLEU7          | 1 | chr13 |
| MFSD12         | 1 | chr19 |

|           |   |       |
|-----------|---|-------|
| LOC653712 | 1 | chr3  |
| CDC7      | 1 | chr1  |
| PEAR1     | 1 | chr1  |
| PIP5K1B   | 1 | chr9  |
| MAGI1     | 1 | chr3  |
| CACNA1H   | 3 | chr16 |
| PPIL4     | 1 | chr6  |
| PIK3C2B   | 1 | chr1  |
| NCOR2     | 2 | chr12 |
| POP1      | 1 | chr8  |
| CMC1      | 1 | chr3  |
| AKIRIN1   | 1 | chr1  |
| CTBP1     | 1 | chr4  |
| ACAP3     | 1 | chr1  |
| JRK       | 1 | chr8  |
| LINC00616 | 1 | chr4  |
| KDM4C     | 1 | chr9  |
| KLF11     | 1 | chr2  |
| IL1RAP    | 2 | chr3  |
| FHDC1     | 1 | chr4  |
| CACNA1G   | 1 | chr17 |
| MUC5B     | 1 | chr11 |
| NRXN3     | 1 | chr14 |
| DCUN1D5   | 1 | chr11 |
| SLC36A1   | 2 | chr5  |
| WDR65     | 1 | chr1  |
| PIGN      | 1 | chr18 |
| CNOT1     | 3 | chr16 |
| DNAJB13   | 1 | chr11 |
| CDH4      | 1 | chr20 |
| RNF149    | 1 | chr2  |
| LHPP      | 1 | chr10 |
| EIF4G3    | 2 | chr1  |
| MIR548AI  | 1 | chr14 |
| PRKAG2    | 3 | chr7  |
| TLR8-AS1  | 1 | chrX  |
| PPM1G     | 1 | chr2  |
| ONECUT1   | 1 | chr15 |
| CACNA1D   | 1 | chr3  |
| CLASP1    | 3 | chr2  |
| PRKAR1B   | 2 | chr7  |
| SLC29A1   | 1 | chr6  |
| MRTO4     | 1 | chr1  |

|                |   |       |
|----------------|---|-------|
| CEP68          | 2 | chr2  |
| ANTXR2         | 2 | chr4  |
| PDZD4          | 1 | chrX  |
| ITGA9          | 1 | chr3  |
| COTL1          | 2 | chr16 |
| MAFK           | 1 | chr7  |
| SYNGR1         | 1 | chr22 |
| CRELD2         | 1 | chr22 |
| CCT6P3         | 1 | chr7  |
| CSMD1          | 1 | chr8  |
| CTSD           | 2 | chr11 |
| C1orf106       | 1 | chr1  |
| BAIAP2         | 3 | chr17 |
| FAM219A        | 1 | chr9  |
| CUL1           | 1 | chr7  |
| CYFIP1         | 1 | chr15 |
| DLGAP2         | 1 | chr8  |
| SNX29          | 1 | chr16 |
| ZFP57          | 1 | chr6  |
| UCK1           | 1 | chr9  |
| FAM189A2       | 1 | chr9  |
| ZNF280C        | 1 | chrX  |
| IL1RAPL1       | 1 | chrX  |
| CUX1           | 4 | chr7  |
| RASA3          | 2 | chr13 |
| ARFGEF1        | 1 | chr8  |
| LARGE          | 1 | chr22 |
| DAG1           | 1 | chr3  |
| MCM3AP         | 1 | chr21 |
| LCLAT1         | 1 | chr2  |
| ZFP82          | 1 | chr19 |
| GNG7           | 1 | chr19 |
| PCNXL2         | 2 | chr1  |
| ABCC5          | 1 | chr3  |
| ATP10A         | 1 | chr15 |
| DAPK3          | 1 | chr19 |
| TFDP2          | 1 | chr3  |
| PIEZO1         | 2 | chr16 |
| TAF4           | 1 | chr20 |
| KIF17          | 1 | chr1  |
| LINC00174      | 1 | chr7  |
| BRSK2          | 1 | chr11 |
| ZNF664-FAM101A | 1 | chr12 |

|              |   |       |
|--------------|---|-------|
| ANO2         | 4 | chr12 |
| NRF1         | 1 | chr7  |
| CRISPLD2     | 1 | chr16 |
| RBM47        | 1 | chr4  |
| TRAPPC8      | 1 | chr18 |
| FAR1         | 1 | chr11 |
| PHKA2        | 1 | chrX  |
| TMED10       | 1 | chr14 |
| SPATA2       | 1 | chr20 |
| COL25A1      | 1 | chr4  |
| AKAP14       | 1 | chrX  |
| RBKS         | 1 | chr2  |
| TNFAIP2      | 1 | chr14 |
| LRRC15       | 1 | chr3  |
| LONRF3       | 1 | chrX  |
| DENND2C      | 1 | chr1  |
| C2orf83      | 1 | chr2  |
| LOC732275    | 1 | chr16 |
| PEBP4        | 1 | chr8  |
| STK40        | 1 | chr1  |
| CCDC113      | 1 | chr16 |
| RAB40B       | 1 | chr17 |
| C1QTNF6      | 1 | chr22 |
| COLEC11      | 1 | chr2  |
| UGT1A3       | 1 | chr2  |
| ANKRD24      | 1 | chr19 |
| CDX2         | 1 | chr13 |
| ZNF282       | 2 | chr7  |
| DBF4B        | 1 | chr17 |
| TOM1L1       | 1 | chr17 |
| FRMD1        | 1 | chr6  |
| SUV420H2     | 1 | chr19 |
| LRCOL1       | 1 | chr12 |
| TMPRSS15     | 1 | chr21 |
| NEBL         | 1 | chr10 |
| KANSL1       | 1 | chr17 |
| SVIL         | 1 | chr10 |
| LOC100286922 | 1 | chr2  |
| FBXL18       | 1 | chr7  |
| UGT1A8       | 1 | chr2  |
| STX2         | 1 | chr12 |
| PHACTR4      | 1 | chr1  |
| POC1B        | 1 | chr12 |



|            |   |       |
|------------|---|-------|
| ADAMTS17   | 2 | chr15 |
| CNOT1      | 2 | chr16 |
| SPEN       | 1 | chr1  |
| AHRR       | 1 | chr5  |
| BOC        | 1 | chr3  |
| MUC17      | 1 | chr7  |
| MLF1       | 1 | chr3  |
| MRC2       | 1 | chr17 |
| RNF128     | 1 | chrX  |
| UBE2H      | 1 | chr7  |
| AKT1       | 1 | chr14 |
| VPS52      | 1 | chr6  |
| COL5A3     | 1 | chr19 |
| UGT1A4     | 1 | chr2  |
| MIR548AN   | 1 | chr13 |
| ADNP2      | 1 | chr18 |
| ATF7IP     | 1 | chr12 |
| TTLL6      | 1 | chr17 |
| PDE9A      | 1 | chr21 |
| FAM19A5    | 2 | chr22 |
| MAEA       | 1 | chr4  |
| RGN        | 1 | chrX  |
| PVRL1      | 1 | chr11 |
| IQSEC1     | 1 | chr3  |
| FAM86HP    | 1 | chr3  |
| NXN        | 1 | chr17 |
| MED24      | 1 | chr17 |
| VGLL4      | 1 | chr3  |
| MICAL3     | 1 | chr22 |
| TMEM184A   | 1 | chr7  |
| CDH23      | 1 | chr10 |
| WNT3A      | 1 | chr1  |
| TNNI3K     | 1 | chr1  |
| EML1       | 1 | chr14 |
| MIPEP      | 1 | chr13 |
| ERICH1-AS1 | 2 | chr8  |
| ASAP1      | 2 | chr8  |
| AGPAT2     | 1 | chr9  |
| HAUS7      | 2 | chrX  |
| ABCG2      | 1 | chr4  |
| USP8       | 1 | chr15 |
| PGS1       | 3 | chr17 |
| MLLT1      | 1 | chr19 |

|             |   |       |
|-------------|---|-------|
| KCNK17      | 2 | chr6  |
| EPHA2       | 1 | chr1  |
| HIBCH       | 1 | chr2  |
| SLC7A5      | 1 | chr16 |
| GSG1L       | 1 | chr16 |
| FAM160B1    | 1 | chr10 |
| C9orf96     | 1 | chr9  |
| DAGLA       | 3 | chr11 |
| MEI1        | 1 | chr22 |
| MYO9B       | 1 | chr19 |
| MRPL45P2    | 2 | chr17 |
| SMAD6       | 1 | chr15 |
| EPB41L2     | 1 | chr6  |
| THBS3       | 1 | chr1  |
| ATG4B       | 2 | chr2  |
| GRM5        | 1 | chr11 |
| MACROD2     | 1 | chr20 |
| POLR2A      | 1 | chr17 |
| C19orf71    | 1 | chr19 |
| TMCO3       | 1 | chr13 |
| COL23A1     | 2 | chr5  |
| INPP5A      | 2 | chr10 |
| GAS7        | 2 | chr17 |
| CHMP6       | 1 | chr17 |
| MGA         | 1 | chr15 |
| CABP1       | 1 | chr12 |
| HOMER3      | 1 | chr19 |
| B4GALNT4    | 1 | chr11 |
| MOB2        | 2 | chr11 |
| RTL1        | 1 | chr14 |
| SERPINH1    | 1 | chr11 |
| JAG2        | 1 | chr14 |
| EED         | 1 | chr11 |
| HMMR        | 1 | chr5  |
| UGT1A9      | 1 | chr2  |
| PIK3R5      | 1 | chr17 |
| DLEU7-AS1   | 1 | chr13 |
| ZNF7        | 1 | chr8  |
| FPGT-TNNI3K | 1 | chr1  |
| ASCL3       | 1 | chr11 |
| ANGPT2      | 1 | chr8  |
| GAK         | 1 | chr4  |
| SEPSECS     | 1 | chr4  |

|             |   |       |
|-------------|---|-------|
| NDP         | 1 | chrX  |
| PTPRN2      | 1 | chr7  |
| SEC14L1     | 1 | chr17 |
| ARMC2       | 1 | chr6  |
| CSNK1G2-AS1 | 1 | chr19 |
| TSPEAR      | 1 | chr21 |
| UHRF1BP1L   | 1 | chr12 |
| IL32        | 1 | chr16 |
| GOLGA8A     | 1 | chr15 |
| SLC39A11    | 1 | chr17 |
| GPR133      | 2 | chr12 |
| NOV         | 1 | chr8  |
| FHIT        | 1 | chr3  |
| PLEKHA6     | 2 | chr1  |
| BSN         | 1 | chr3  |
| AFMID       | 1 | chr17 |
| NFAT5       | 1 | chr16 |
| PCSK6       | 1 | chr15 |
| NLRP2       | 1 | chr19 |
| CLCN7       | 2 | chr16 |
| C10orf54    | 1 | chr10 |
| C4orf45     | 1 | chr4  |
| ITPR2       | 1 | chr12 |
| FGD4        | 1 | chr12 |
| FCHO1       | 1 | chr19 |
| BIN1        | 2 | chr2  |
| PARD6G      | 2 | chr18 |
| ECE1        | 1 | chr1  |
| SIPA1L3     | 1 | chr19 |
| TUFT1       | 1 | chr1  |
| ANP32E      | 2 | chr1  |
| DOK6        | 1 | chr18 |
| PDE1A       | 1 | chr2  |
| PLGRKT      | 1 | chr9  |
| SHANK2      | 2 | chr11 |
| CACNA1B     | 1 | chr9  |
| PCCA        | 1 | chr13 |
| C15orf27    | 1 | chr15 |
| LEMD2       | 1 | chr6  |
| CHMP5       | 1 | chr9  |
| EPB41L4A    | 2 | chr5  |
| ISM1        | 1 | chr20 |
| UGT1A7      | 1 | chr2  |

|            |   |       |
|------------|---|-------|
| ATP11A     | 1 | chr13 |
| RPF2       | 1 | chr6  |
| VAV2       | 5 | chr9  |
| WDR24      | 1 | chr16 |
| FRMD1      | 2 | chr6  |
| PACSIN1    | 1 | chr6  |
| FLI1       | 2 | chr11 |
| HTT        | 1 | chr4  |
| ACSL6      | 1 | chr5  |
| PLA2G3     | 1 | chr22 |
| MAPT       | 1 | chr17 |
| ZCCHC14    | 1 | chr16 |
| TRAPPC9    | 1 | chr8  |
| HPS5       | 1 | chr11 |
| C1orf65    | 2 | chr1  |
| GABRB3     | 1 | chr15 |
| KCND3      | 1 | chr1  |
| DGKQ       | 1 | chr4  |
| MAP2K2     | 1 | chr19 |
| YWHAE      | 2 | chr17 |
| TAF1C      | 1 | chr16 |
| HDGFRP2    | 1 | chr19 |
| WDR4       | 2 | chr21 |
| ARHGAP19   | 2 | chr10 |
| EIF4A3     | 1 | chr17 |
| PCP4       | 1 | chr21 |
| UGT1A10    | 1 | chr2  |
| FGF13      | 3 | chrX  |
| C7orf50    | 1 | chr7  |
| PDK3       | 1 | chrX  |
| IL6R       | 1 | chr1  |
| PARD6G-AS1 | 2 | chr18 |
| MCPH1      | 1 | chr8  |
| EPG5       | 1 | chr18 |
| VDR        | 2 | chr12 |
| ABCC6      | 1 | chr16 |
| TNFRSF8    | 1 | chr1  |
| RPRD2      | 1 | chr1  |
| ALDH1L1    | 1 | chr3  |
| MMRN2      | 1 | chr10 |

**site locations**

18158286  
35502532  
41050290  
1954126  
76118451  
7633798  
4622638  
162870234  
60926221  
60816889  
71692546  
23438616,23441116  
3982840  
138831135  
153311755  
33323126  
99047710,99047711  
3102462  
84514963  
14506631  
13694628  
26982357  
12156554  
113693327,113705141  
39631463  
50935283  
100026843  
9804096  
1493030  
102277334  
101903335,101915394  
184848069  
160101991,160102738  
3192535  
1956361  
111114534  
143313650  
2041154,2048727,2063148  
151998404  
219186591  
21892980  
8088757

40082534  
72137560  
234663653  
5047168  
47421793  
8468337  
3570186,3621933  
47086345  
48339985  
134494941  
72949954  
117883900  
23438616,23441116  
56732799,56733571  
8278123  
18183527  
195925355  
29834071  
144902969  
2495420  
103128775  
132187312  
65345703  
2291790,2293508  
30899353  
444996  
8993970  
3062322  
2131565,2131578  
533036  
111926896  
234663653  
132058408  
179145862  
49022855,49022886  
177546160  
56845938  
63269640,63269641,63328784  
111784923  
89498970  
3819891  
51417534  
3543396

128587817  
91983472  
156883491  
71477604  
65412778  
1211221,1214678,1235322  
149846961  
204417023  
124826676,124860830  
99137831  
28296877  
39468217  
1224647  
1229850  
143747271  
138973585  
7147974  
10191713  
190352746,190352783  
153896358  
48689799  
1271429  
79562574  
102958119  
150834304,150834312  
43702360  
59803822  
58560322,58610256,58610257  
73681089  
60450242  
101894221  
126208561  
21134595,21134596  
29968344  
151393353,151398709,151406005  
12924035  
27605982  
53081116  
53534199  
122106474,122350965,122350966  
752407,752449  
44198397  
19583733

65289622,65289948  
80885978,80885996  
153073318  
37572577  
84608934,84615224  
1574811  
39746803  
50318505  
64516736  
3828373  
1777815,1778321  
200863771  
79042974,79063592,79068407  
34400580  
148480233  
22896102  
1455439  
12174662  
29644039  
134405414  
71951803  
129385813  
29547567  
101694275,101858142,101892327,101771662  
114802859,114880846  
68223105  
34060801  
49517215  
47691729  
30822053  
36893856  
2601809  
233399443,233399444  
183713816  
25978503  
3966518  
141846292  
88797567,88799286  
60598912  
21043852  
65852199  
1435516  
124590414



5998344,5998328,5998366,5998367

129265545

84872049

40599002

29457371

13695712

18934350

75621019

48526703

109933638

119046195

28063222

103595564

194077617

118143818

115174199

228491298

86369306

22770137

36810010

58300770

80617214

37578578

3648757

234663653

4190586

28541503

148904623,148909758

42827672

53013356

168474308

55856850

133186812

19693947

21183608

44286196

29780291

234663653

5541655

234663653

131276761

28756657

89897387

100514524,100667714  
58610256,58610257  
16184131  
355048  
112991312  
100684925  
158319418  
60728953  
106007285  
129534618  
105249322  
33223425  
10102490  
234663653  
100043086  
77879657  
14594740  
46879962  
44152788  
49146297,49146298  
1310925  
46948159  
119574608  
12946689  
129822550  
743982  
38179288  
11611732  
18281728  
1587041  
73521730  
228206934  
74712951  
100402814  
24341072  
872324,1042396  
131069818,131427223  
139578879  
152746484,152746485  
89021640  
50752566  
76400505,76400506,76414300  
6213321

39271537,39271538  
16455051  
191150856  
87871580  
27802755  
116636620  
136247289  
61456424,61458594,61494325  
42143536  
17188322  
45565093,45565384  
66998856  
131245620  
155174105  
242584161,242610500  
88619806  
14423493  
7405073  
3543396  
114166775  
177741111,177808674  
134372679,134372680  
9820694,9820695  
78971536  
42024577  
121088884  
19041551  
372156  
1777815,1778321  
101349763  
75279846  
105622272  
85964886  
162896152  
234663653  
8789358  
51417534  
146068321  
74712951  
8959545  
6365738  
878078  
25158222

43829064  
157606110  
75170673  
109276551  
1954126  
46101348  
100518917  
3117519  
34702884  
71031784  
131519660,131521885  
120433500  
60004440  
204219848,204219849  
49701981  
76198457  
69662907  
101915394  
55495378  
1497136,1505429  
73521730  
159893282  
26924516  
32677157  
17899267  
127860879,127861446  
77918010,77918012  
21630582  
38627237  
151527035  
150194484,150202102  
67361019  
183363989  
5433404  
70425842,70425843  
141002309  
101106210  
76448776  
33742193  
33269800  
111696502,111696538  
13213728  
234663653

113362104  
111313236  
136778878,136789528,136809115,136809118,136816939  
737791  
168474308,168479602  
34466126  
128611281,128611282  
3234979  
131327896  
31533965  
44022067  
87496161  
141269708  
18338734  
223566800,223567075  
26915677  
112525031  
960712  
4094774  
1252535,1252536  
84212777  
4490302  
44280703,44290375  
99047710,99047711  
78114653  
41297673  
234663653  
138085209,138136474,138192626  
1100693  
24556724  
154416933  
77918010,77918012  
6365738  
43522083  
48257325,48257326  
16280872  
12188481  
150423967  
125834605  
88703316

| <b>Gene name</b> | <b>number of high covariance sites</b> | <b>chromosome</b> |
|------------------|----------------------------------------|-------------------|
| PKD1L2           | 1                                      | chr16             |
| WDR72            | 11                                     | chr15             |
| PRKX             | 1                                      | chrX              |
| SPTBN4           | 1                                      | chr19             |
| DLGAP2           | 2                                      | chr8              |
| COL23A1          | 1                                      | chr5              |
| ZNF517           | 1                                      | chr8              |
| TRIM6-TRIM34     | 1                                      | chr11             |
| ARRB2            | 1                                      | chr17             |
| MAP3K4           | 1                                      | chr6              |
| FANCA            | 2                                      | chr16             |
| BIN3             | 1                                      | chr8              |
| PRL              | 1                                      | chr6              |
| FBRSL1           | 1                                      | chr12             |
| ANKRD24          | 1                                      | chr19             |
| SOX13            | 2                                      | chr1              |
| RHOBTB3          | 1                                      | chr5              |
| RAB36            | 2                                      | chr22             |
| LDB2             | 1                                      | chr4              |
| SYNPR            | 1                                      | chr3              |
| HSH2D            | 2                                      | chr19             |
| KIAA1217         | 2                                      | chr10             |
| LPP              | 1                                      | chr3              |
| USH2A            | 1                                      | chr1              |
| ZFHX3            | 2                                      | chr16             |
| CELF5            | 1                                      | chr19             |
| MRTO4            | 1                                      | chr1              |
| EPHA3            | 1                                      | chr3              |
| GPCPD1           | 1                                      | chr20             |
| TAF3             | 1                                      | chr10             |
| TAF2             | 1                                      | chr8              |
| LRP5             | 1                                      | chr11             |
| LINC00461        | 1                                      | chr5              |
| HSPG2            | 1                                      | chr1              |
| GAS6             | 1                                      | chr13             |
| HEATR2           | 1                                      | chr7              |
| ERLEC1           | 2                                      | chr2              |
| CEP70            | 1                                      | chr3              |
| ESR1             | 1                                      | chr6              |
| TUSC5            | 1                                      | chr17             |
| KRT72            | 1                                      | chr12             |
| ZDHHC14          | 3                                      | chr6              |

|               |   |       |
|---------------|---|-------|
| STOX2         | 1 | chr4  |
| GLYR1         | 1 | chr16 |
| DENND2A       | 1 | chr7  |
| CYP2E1        | 1 | chr10 |
| ATF7          | 1 | chr12 |
| ZFYVE21       | 1 | chr14 |
| FAM58A        | 1 | chrX  |
| AFMID         | 2 | chr17 |
| PRSS21        | 1 | chr16 |
| SPI1          | 1 | chr11 |
| FLG           | 2 | chr1  |
| INTS1         | 1 | chr7  |
| NUDCD1        | 1 | chr8  |
| ROBO1         | 5 | chr3  |
| C6orf147      | 1 | chr6  |
| TGIF1         | 1 | chr18 |
| C1orf159      | 1 | chr1  |
| FAM108C1      | 1 | chr15 |
| CIT           | 1 | chr12 |
| LOC100507373  | 1 | chr19 |
| ZFYVE28       | 1 | chr4  |
| DKFZp686K1684 | 1 | chr11 |
| DIP2C         | 1 | chr10 |
| DHDH          | 1 | chr19 |
| RNF26         | 1 | chr11 |
| FGGY          | 1 | chr1  |
| SEMA4B        | 1 | chr15 |
| WDR86         | 6 | chr7  |
| PMF1-BGLAP    | 1 | chr1  |
| SLC2A5        | 1 | chr1  |
| TYW1          | 2 | chr7  |
| CCM2          | 1 | chr7  |
| PEAR1         | 2 | chr1  |
| LOC441601     | 3 | chr11 |
| EPHA8         | 1 | chr1  |
| ANO2          | 2 | chr12 |
| SCAMP4        | 1 | chr19 |
| C20orf85      | 2 | chr20 |
| TTLL1         | 1 | chr22 |
| SEC1P         | 1 | chr19 |
| DTYMK         | 1 | chr2  |
| RBMS3         | 2 | chr3  |
| C17orf107     | 1 | chr17 |

|                |   |       |
|----------------|---|-------|
| CCDC65         | 1 | chr12 |
| NNT            | 1 | chr5  |
| PHF13          | 1 | chr1  |
| NFIC           | 2 | chr19 |
| EPHA1-AS1      | 1 | chr7  |
| SCRIB          | 1 | chr8  |
| KCNQ1          | 1 | chr11 |
| TPCN2          | 2 | chr11 |
| TNPO3          | 1 | chr7  |
| WDR4           | 2 | chr21 |
| ADK            | 1 | chr10 |
| RINL           | 1 | chr19 |
| ATP10A         | 1 | chr15 |
| SBNO2          | 2 | chr19 |
| PHF21B         | 3 | chr22 |
| DKK3           | 1 | chr11 |
| PGP            | 1 | chr16 |
| PTK7           | 1 | chr6  |
| SH3BP2         | 1 | chr4  |
| MROH1          | 1 | chr8  |
| BLOC1S5-TXNDC5 | 2 | chr6  |
| KCNQ2          | 1 | chr20 |
| ZNF444         | 1 | chr19 |
| CHRNE          | 1 | chr17 |
| MORN1          | 1 | chr1  |
| PMF1           | 1 | chr1  |
| RAB35          | 1 | chr12 |
| RWDD4          | 1 | chr4  |
| SLC15A4        | 1 | chr12 |
| BAZ1A          | 2 | chr14 |
| FAM53A         | 2 | chr4  |
| POLDIP3        | 1 | chr22 |
| CANX           | 1 | chr5  |
| DHX8           | 1 | chr17 |
| CEP72          | 1 | chr5  |
| ARID4B         | 2 | chr1  |
| TMED10         | 1 | chr14 |
| KCNT1          | 1 | chr9  |
| TMPRSS15       | 1 | chr21 |
| EIF4G3         | 3 | chr1  |
| BANF2          | 1 | chr20 |
| FKBP9          | 1 | chr7  |
| PLEKHO2        | 1 | chr15 |



|               |   |       |
|---------------|---|-------|
| PLIN4         | 1 | chr19 |
| ZC3H12D       | 1 | chr6  |
| URGCP         | 1 | chr7  |
| ENOSF1        | 2 | chr18 |
| 9-Sep         | 1 | chr17 |
| FADS2         | 1 | chr11 |
| STON1-GTF2A1L | 1 | chr2  |
| NR1I2         | 1 | chr3  |
| PRKCZ         | 1 | chr1  |
| PRR5          | 1 | chr22 |
| RPL23AP53     | 5 | chr8  |
| LLGL2         | 1 | chr17 |
| POP1          | 1 | chr8  |
| CMC1          | 1 | chr3  |
| MGAT3         | 1 | chr22 |
| GRAMD1A       | 1 | chr19 |
| EFCAB2        | 1 | chr1  |
| RBFOX1        | 1 | chr16 |
| GRM2          | 1 | chr3  |
| ANKRD13C      | 1 | chr1  |
| CHFR          | 3 | chr12 |
| PIGG          | 2 | chr4  |
| NGEF          | 1 | chr2  |
| ABCC1         | 1 | chr16 |
| SCG5          | 1 | chr15 |
| CNTRL         | 1 | chr9  |
| TSHZ3         | 1 | chr19 |
| PARP9         | 1 | chr3  |
| LDLRAD4       | 1 | chr18 |
| PPP2R2B       | 1 | chr5  |
| PTER          | 1 | chr10 |
| SPTB          | 1 | chr14 |
| MMP25         | 2 | chr16 |
| INF2          | 2 | chr14 |
| PKNOX1        | 1 | chr21 |
| SEC14L5       | 1 | chr16 |
| RAB30         | 1 | chr11 |
| RHBDL2        | 1 | chr1  |
| DNMT1         | 1 | chr19 |
| PTBP1         | 1 | chr19 |
| ATG4B         | 1 | chr2  |
| EFR3B         | 1 | chr2  |
| AGAP1         | 1 | chr2  |

|             |   |       |
|-------------|---|-------|
| PRKAG2      | 2 | chr7  |
| LOC285627   | 1 | chr5  |
| ATRNL1      | 1 | chr10 |
| THSD7A      | 1 | chr7  |
| MDGA2       | 1 | chr14 |
| WWOX        | 2 | chr16 |
| NUBPL       | 1 | chr14 |
| ERCC8       | 1 | chr5  |
| DCDC2       | 2 | chr6  |
| CNTNAP2     | 1 | chr7  |
| AK8         | 1 | chr9  |
| ATG14       | 1 | chr14 |
| PIGN        | 1 | chr18 |
| CNOT1       | 3 | chr16 |
| RPF2        | 1 | chr6  |
| MYO7A       | 1 | chr11 |
| HOPX        | 1 | chr4  |
| TBCE        | 1 | chr1  |
| DYSF        | 1 | chr2  |
| KHDC1       | 1 | chr6  |
| LRRC27      | 1 | chr10 |
| CATSPERD    | 1 | chr19 |
| RASA3       | 1 | chr13 |
| ARNT2       | 1 | chr15 |
| WWOX        | 1 | chr16 |
| NTM         | 1 | chr11 |
| CDH4        | 1 | chr20 |
| PXDN        | 1 | chr2  |
| SF3B3       | 1 | chr16 |
| UGT1A9      | 1 | chr2  |
| TMX2-CTNND1 | 1 | chr11 |
| TRIM62      | 1 | chr1  |
| ADAMTS17    | 1 | chr15 |
| ZMAT4       | 1 | chr8  |
| SH3TC1      | 1 | chr4  |
| IL1RL2      | 1 | chr2  |
| CPSF3L      | 1 | chr1  |
| UGT1A6      | 1 | chr2  |
| CUX1        | 3 | chr7  |
| IL1RAPL1    | 3 | chrX  |
| PTCHD2      | 1 | chr1  |
| CHD1        | 1 | chr5  |
| ANK1        | 1 | chr8  |

|            |   |       |
|------------|---|-------|
| ZNF578     | 1 | chr19 |
| RBFOX1     | 2 | chr16 |
| FBXL20     | 1 | chr17 |
| AIG1       | 1 | chr6  |
| CTNND1     | 1 | chr11 |
| ROS1       | 1 | chr6  |
| BANP       | 1 | chr16 |
| ERICH1-AS1 | 1 | chr8  |
| PHGDH      | 1 | chr1  |
| CXCL13     | 1 | chr4  |
| LYRM4      | 1 | chr6  |
| NAGPA      | 1 | chr16 |
| BCAP29     | 1 | chr7  |
| MIR5095    | 1 | chr20 |
| NPEPL1     | 2 | chr20 |
| UGT1A8     | 1 | chr2  |
| UGT1A10    | 1 | chr2  |
| CTSD       | 2 | chr11 |
| ADCY3      | 1 | chr2  |
| GLTSCR1L   | 1 | chr6  |
| MGAT4C     | 1 | chr12 |
| AIDA       | 1 | chr1  |
| NLRP5      | 1 | chr19 |
| DSCAML1    | 1 | chr11 |
| MAGIX      | 1 | chrX  |
| KCNB2      | 1 | chr8  |
| SYT2       | 2 | chr1  |
| CDH4       | 2 | chr20 |
| BCYRN1     | 1 | chrX  |
| SIK1       | 1 | chr21 |
| SENP5      | 2 | chr3  |
| SNX27      | 1 | chr1  |
| SURF6      | 3 | chr9  |
| WBSCR17    | 1 | chr7  |
| MYRF       | 2 | chr11 |
| ZBTB11     | 1 | chr3  |
| AGMO       | 1 | chr7  |
| HELZ2      | 1 | chr20 |
| CEP112     | 1 | chr17 |
| TSC22D1    | 1 | chr13 |
| VEGFC      | 1 | chr4  |
| XKR6       | 1 | chr8  |
| MACROD2    | 3 | chr20 |

|           |   |       |
|-----------|---|-------|
| LARGE     | 1 | chr22 |
| DAG1      | 1 | chr3  |
| GRID2     | 1 | chr4  |
| PQLC1     | 2 | chr18 |
| MAEA      | 1 | chr4  |
| LINGO2    | 2 | chr9  |
| ASB18     | 1 | chr2  |
| PRMT8     | 1 | chr12 |
| LOC389634 | 1 | chr12 |
| ZFP82     | 1 | chr19 |
| ZNF57     | 2 | chr19 |
| BYSL      | 1 | chr6  |
| P2RX4     | 1 | chr12 |
| BLOC1S5   | 2 | chr6  |
| INF2      | 1 | chr14 |
| DTNB      | 1 | chr2  |
| TNFRSF1B  | 1 | chr1  |
| SERPINH1  | 1 | chr11 |
| FAM213B   | 2 | chr1  |
| RPS6KA2   | 3 | chr6  |
| ACTL9     | 1 | chr19 |
| CYFIP1    | 1 | chr15 |
| ABCC5     | 1 | chr3  |
| NDUFS7    | 1 | chr19 |
| HELB      | 2 | chr12 |
| TSPAN11   | 1 | chr12 |
| MPP7      | 1 | chr10 |
| CDH23     | 1 | chr10 |
| MAP2K2    | 2 | chr19 |
| OR7E156P  | 1 | chr13 |
| VAC14     | 1 | chr16 |
| DGKE      | 1 | chr17 |
| TEAD4     | 2 | chr12 |
| TAF4      | 1 | chr20 |
| FLJ16171  | 1 | chr5  |
| TENM2     | 1 | chr5  |
| TM7SF3    | 1 | chr12 |
| PSME3     | 1 | chr17 |
| CLIP2     | 1 | chr7  |
| UBE2K     | 1 | chr4  |
| HMGA1P7   | 1 | chr6  |
| MYEOV     | 1 | chr11 |
| SYAP1     | 1 | chrX  |

|              |   |       |
|--------------|---|-------|
| B3GNTL1      | 2 | chr17 |
| LINC00200    | 2 | chr10 |
| CLYBL        | 2 | chr13 |
| WDR27        | 1 | chr6  |
| SRSF4        | 1 | chr1  |
| ABCC4        | 1 | chr13 |
| SPATA2       | 1 | chr20 |
| SSTR5        | 2 | chr16 |
| FAM184A      | 2 | chr6  |
| KAT2B        | 2 | chr3  |
| FOXN3        | 1 | chr14 |
| DTNBP1       | 1 | chr6  |
| GTF3C1       | 1 | chr16 |
| PIP5K1C      | 1 | chr19 |
| CCDC171      | 1 | chr9  |
| CTBP2        | 1 | chr10 |
| FAT3         | 1 | chr11 |
| FAR1         | 1 | chr11 |
| CACNA1I      | 2 | chr22 |
| AP3D1        | 1 | chr19 |
| STX16-NPEPL1 | 2 | chr20 |
| SLC17A1      | 1 | chr6  |
| BFSP2        | 1 | chr3  |
| EP400        | 2 | chr12 |
| AKR1C3       | 1 | chr10 |
| EEF1E1-MUTED | 2 | chr6  |
| LRRC4C       | 1 | chr11 |
| SORCS2       | 3 | chr4  |
| LRRC15       | 1 | chr3  |
| PHF17        | 1 | chr4  |
| NDE1         | 2 | chr16 |
| EPC1         | 1 | chr10 |
| LAPTM4B      | 4 | chr8  |
| ADAMTS13     | 2 | chr9  |
| SH3GL1       | 1 | chr19 |
| CAGE1        | 1 | chr6  |
| FGFR3        | 5 | chr4  |
| UNC79        | 1 | chr14 |
| YAE1D1       | 1 | chr7  |
| IFNAR1       | 1 | chr21 |
| LOC442459    | 1 | chrX  |
| ATP2B3       | 1 | chrX  |
| KDM2B        | 3 | chr12 |

|                |   |       |
|----------------|---|-------|
| MSI2           | 1 | chr17 |
| COL14A1        | 2 | chr8  |
| STAG1          | 1 | chr3  |
| KLHL30         | 1 | chr2  |
| TPPP           | 1 | chr5  |
| C2CD2          | 1 | chr21 |
| ARSG           | 1 | chr17 |
| ABCA2          | 1 | chr9  |
| STK32B         | 1 | chr4  |
| PRR5-ARHGAP8   | 1 | chr22 |
| L3MBTL4        | 1 | chr18 |
| TMEM240        | 5 | chr1  |
| MMP17          | 1 | chr12 |
| TNRC18         | 3 | chr7  |
| RIMS2          | 1 | chr8  |
| DIDO1          | 2 | chr20 |
| HDAC4          | 3 | chr2  |
| C15orf38-AP3S2 | 1 | chr15 |
| C6orf99        | 1 | chr6  |
| BCAS3          | 1 | chr17 |
| KLHDC10        | 1 | chr7  |
| RILPL1         | 1 | chr12 |
| YWHAE          | 1 | chr17 |
| HCN1           | 1 | chr5  |
| XRN2           | 2 | chr20 |
| NEBL           | 1 | chr10 |
| GLT25D2        | 1 | chr1  |
| LAMA4          | 1 | chr6  |
| GMDS           | 1 | chr6  |
| KIR3DX1        | 2 | chr19 |
| SVIL           | 1 | chr10 |
| LIMA1          | 1 | chr12 |
| ATP8A1         | 1 | chr4  |
| CADPS          | 1 | chr3  |
| PPFIA3         | 2 | chr19 |
| SLC16A10       | 1 | chr6  |
| CNOT1          | 2 | chr16 |
| COLEC11        | 2 | chr2  |
| B3GALT6        | 1 | chr1  |
| ACYP1          | 1 | chr14 |
| MUC17          | 1 | chr7  |
| DUSP13         | 1 | chr10 |
| MRC2           | 1 | chr17 |

|              |   |       |
|--------------|---|-------|
| RBMS1        | 1 | chr2  |
| SORCS1       | 1 | chr10 |
| FAT1         | 1 | chr4  |
| EHMT1        | 1 | chr9  |
| DMD          | 3 | chrX  |
| MORC2-AS1    | 1 | chr22 |
| TOM1         | 1 | chr22 |
| ADNP2        | 1 | chr18 |
| GPC5         | 1 | chr13 |
| PDE9A        | 1 | chr21 |
| TMEM132D     | 1 | chr12 |
| AP3S2        | 1 | chr15 |
| LINC00624    | 1 | chr1  |
| BPTF         | 1 | chr17 |
| CDRT1        | 1 | chr17 |
| PCNT         | 1 | chr21 |
| GREM1        | 2 | chr15 |
| GATA4        | 1 | chr8  |
| GPSM1        | 1 | chr9  |
| CCNY         | 1 | chr10 |
| POR          | 2 | chr7  |
| LOC100506207 | 1 | chr6  |
| ZNF77        | 1 | chr19 |
| TMEM72-AS1   | 1 | chr10 |
| AGPS         | 1 | chr2  |
| CEP120       | 1 | chr5  |
| LOC653160    | 1 | chr1  |
| EMC1         | 1 | chr1  |
| SKI          | 1 | chr1  |
| LAMA5        | 5 | chr20 |
| FZR1         | 2 | chr19 |
| SYNM         | 1 | chr15 |
| DCTN2        | 1 | chr12 |
| SLC47A2      | 1 | chr17 |
| MIPEP        | 1 | chr13 |
| COL19A1      | 1 | chr6  |
| FRMD1        | 4 | chr6  |
| SHANK2       | 3 | chr11 |
| LTBP1        | 1 | chr2  |
| HDAC9        | 1 | chr7  |
| SGMS1        | 1 | chr10 |
| RAB11FIP4    | 1 | chr17 |
| SPON1        | 1 | chr11 |

|            |   |       |
|------------|---|-------|
| WISP1      | 1 | chr8  |
| CNTN4      | 1 | chr3  |
| EPN2       | 1 | chr17 |
| FLRT1      | 1 | chr11 |
| ANKRD20A9P | 1 | chr13 |
| SLC16A6    | 1 | chr17 |
| KCNK17     | 2 | chr6  |
| WDR19      | 1 | chr4  |
| PLA2G4E    | 1 | chr15 |
| RASGRF1    | 1 | chr15 |
| GRK5       | 2 | chr10 |
| TBC1D22A   | 4 | chr22 |
| DOT1L      | 1 | chr19 |
| CFDP1      | 2 | chr16 |
| MRPL54     | 1 | chr19 |
| NPY        | 1 | chr7  |
| AP3M1      | 1 | chr10 |
| EBF4       | 1 | chr20 |
| ENPP6      | 1 | chr4  |
| TSNARE1    | 2 | chr8  |
| COL4A5     | 2 | chrX  |
| ARRDC5     | 2 | chr19 |
| RAPGEF3    | 1 | chr12 |
| DMD        | 2 | chrX  |
| JMJD1C     | 1 | chr10 |
| GRM5       | 1 | chr11 |
| TSPAN9     | 2 | chr12 |
| PDXDC2P    | 1 | chr16 |
| NRXN1      | 1 | chr2  |
| ARIH1      | 1 | chr15 |
| WDR85      | 1 | chr9  |
| LOC441666  | 6 | chr10 |
| FGD3       | 1 | chr9  |
| INTS8      | 1 | chr8  |
| EPS8L1     | 1 | chr19 |
| KPNA1      | 1 | chr3  |
| DLEU7      | 3 | chr13 |
| FGFBP2     | 1 | chr4  |
| CABP1      | 1 | chr12 |
| LINGO2     | 1 | chr9  |
| ABO        | 2 | chr9  |
| MYBPC2     | 1 | chr19 |
| CSMD1      | 1 | chr8  |



|            |   |       |
|------------|---|-------|
| MIR5694    | 1 | chr10 |
| IFT27      | 2 | chr22 |
| SFRP1      | 1 | chr8  |
| CLN6       | 2 | chr15 |
| EPPK1      | 1 | chr8  |
| RMND1      | 1 | chr6  |
| MOB2       | 2 | chr11 |
| C7orf50    | 1 | chr7  |
| EIF2AK4    | 1 | chr15 |
| KLF12      | 1 | chr13 |
| ZNF815P    | 1 | chr7  |
| TMEM51-AS1 | 1 | chr1  |
| PRKXP1     | 1 | chr15 |
| SLC29A4    | 1 | chr7  |
| RAB11FIP3  | 1 | chr16 |
| ATPBD4-AS1 | 1 | chr15 |
| S1PR2      | 1 | chr19 |
| NFATC1     | 2 | chr18 |
| KIF26B     | 3 | chr1  |
| COA1       | 1 | chr7  |
| PCSK6      | 1 | chr15 |
| MCPH1      | 1 | chr8  |
| CAMSAP3    | 1 | chr19 |
| BEND2      | 1 | chrX  |
| ITGBL1     | 1 | chr13 |
| UGT1A3     | 1 | chr2  |
| SAMD12     | 1 | chr8  |
| PCDH9      | 1 | chr13 |
| PLEKHH2    | 1 | chr2  |
| ADAMTSL1   | 1 | chr9  |
| KLHL29     | 1 | chr2  |
| PTPRN2     | 3 | chr7  |
| RNU6-81    | 1 | chr2  |
| LRRTM4     | 1 | chr2  |
| MCOLN1     | 1 | chr19 |
| KANK1      | 2 | chr9  |
| LINC00693  | 1 | chr3  |
| UGT1A7     | 1 | chr2  |
| FAM189A1   | 1 | chr15 |
| MYH14      | 1 | chr19 |
| LPHN1      | 1 | chr19 |
| OTX2-AS1   | 1 | chr14 |
| ADAMTSL3   | 1 | chr15 |

|            |    |       |
|------------|----|-------|
| EYA4       | 2  | chr6  |
| ZDHHC8P1   | 1  | chr22 |
| SHISA6     | 1  | chr17 |
| KLHL15     | 1  | chrX  |
| AFMID      | 3  | chr17 |
| ZDHHC19    | 2  | chr3  |
| HAAO       | 1  | chr2  |
| ANTXR2     | 13 | chr4  |
| LOC286094  | 1  | chr8  |
| HRNR       | 2  | chr1  |
| MPND       | 1  | chr19 |
| ADAMTS2    | 3  | chr5  |
| ASB13      | 1  | chr10 |
| CACNA1H    | 1  | chr16 |
| TRIM6      | 1  | chr11 |
| MLLT1      | 1  | chr19 |
| AASDH      | 1  | chr4  |
| NPRL3      | 1  | chr16 |
| MYH3       | 1  | chr17 |
| ELFN1      | 1  | chr7  |
| QRICH2     | 1  | chr17 |
| UGT1A5     | 1  | chr2  |
| CNTN6      | 1  | chr3  |
| AK5        | 1  | chr1  |
| ERBB4      | 1  | chr2  |
| DNAH5      | 1  | chr5  |
| BSN        | 1  | chr3  |
| PTPRT      | 1  | chr20 |
| SOD3       | 1  | chr4  |
| ZNF208     | 1  | chr19 |
| UGT1A4     | 1  | chr2  |
| PODN       | 1  | chr1  |
| TP73       | 1  | chr1  |
| AES        | 1  | chr19 |
| NLRP2      | 1  | chr19 |
| TAF1C      | 1  | chr16 |
| GPR75-ASB3 | 2  | chr2  |
| SHANK2     | 4  | chr11 |
| C2orf83    | 1  | chr2  |
| RIPK4      | 1  | chr21 |
| PNPT1      | 1  | chr2  |
| ARSF       | 1  | chrX  |
| TAZ        | 1  | chrX  |

|              |   |       |
|--------------|---|-------|
| CABLES2      | 1 | chr20 |
| NTN1         | 2 | chr17 |
| LOC100130691 | 1 | chr2  |
| OTOA         | 1 | chr16 |
| RYR1         | 1 | chr19 |
| PKD1L2       | 2 | chr16 |
| GRWD1        | 1 | chr19 |
| FRMD1        | 3 | chr6  |
| MMEL1        | 2 | chr1  |
| FLJ12825     | 1 | chr12 |
| SIPA1L3      | 1 | chr19 |
| PDE11A       | 1 | chr2  |
| ANP32E       | 2 | chr1  |
| MIR181C      | 1 | chr19 |
| CHRM3        | 1 | chr1  |
| LINC00673    | 2 | chr17 |
| URGCP-MRPS24 | 1 | chr7  |
| ITPR2        | 1 | chr12 |
| DYDC2        | 1 | chr10 |
| FAM20C       | 1 | chr7  |
| KIF26A       | 1 | chr14 |
| SCFD2        | 1 | chr4  |
| KAZN         | 1 | chr1  |
| PCCA         | 1 | chr13 |
| WDR37        | 1 | chr10 |
| C11orf65     | 1 | chr11 |
| RGS12        | 1 | chr4  |
| HADHA        | 1 | chr2  |
| KIAA1751     | 1 | chr1  |
| KIF19        | 1 | chr17 |
| LINC00294    | 1 | chr11 |
| SLC35E2      | 1 | chr1  |
| PSD3         | 5 | chr8  |
| NAV1         | 1 | chr1  |
| MAP3K12      | 1 | chr12 |
| PIBF1        | 1 | chr13 |
| KLHL6        | 1 | chr3  |
| STK11        | 1 | chr19 |
| MAD2L2       | 1 | chr1  |
| ABCA7        | 2 | chr19 |
| KCND3        | 1 | chr1  |
| DNAJB13      | 1 | chr11 |
| CACNA1G      | 1 | chr17 |

|           |   |       |
|-----------|---|-------|
| NTNG1     | 1 | chr1  |
| LOC286238 | 2 | chr9  |
| SIRT1     | 2 | chr10 |
| FARP1     | 1 | chr13 |
| TIMD4     | 1 | chr5  |
| ECT2L     | 1 | chr6  |
| FLI1      | 2 | chr11 |
| CCDC61    | 1 | chr19 |
| ADAMTS12  | 1 | chr5  |
| TRPM8     | 1 | chr2  |
| HTT       | 1 | chr4  |
| MACROD1   | 1 | chr11 |
| SUN1      | 1 | chr7  |
| PIEZO1    | 2 | chr16 |
| ADARB2    | 1 | chr10 |
| STON1     | 1 | chr2  |
| C1QTNF2   | 1 | chr5  |
| SLC2A6    | 1 | chr9  |
| DYDC1     | 1 | chr10 |
| DNAH7     | 1 | chr2  |
| AGT       | 1 | chr1  |
| EIF4G3    | 1 | chr1  |
| BCR       | 1 | chr22 |
| GSX1      | 1 | chr13 |
| KIAA1967  | 2 | chr8  |
| ACSM1     | 2 | chr16 |
| EPB41     | 1 | chr1  |
| OCA2      | 1 | chr15 |
| ACOT7     | 4 | chr1  |
| CAPN10    | 3 | chr2  |
| CUL3      | 1 | chr2  |
| CXCR3     | 1 | chrX  |
| DHX37     | 3 | chr12 |
| EHMT1     | 2 | chr9  |
| UBN1      | 1 | chr16 |
| DAGLA     | 2 | chr11 |
| OCEL1     | 1 | chr19 |
| KDM4B     | 2 | chr19 |
| CNPY1     | 1 | chr7  |
| TNC       | 2 | chr9  |
| RYR3      | 1 | chr15 |
| MLLT10    | 1 | chr10 |
| ATP8B4    | 3 | chr15 |

|           |   |       |
|-----------|---|-------|
| ME1       | 3 | chr6  |
| KSR1      | 1 | chr17 |
| C11orf44  | 2 | chr11 |
| PLXNC1    | 1 | chr12 |
| FANCC     | 2 | chr9  |
| OPRD1     | 1 | chr1  |
| MND1      | 1 | chr4  |
| SLC47A1   | 2 | chr17 |
| LINC00616 | 1 | chr4  |
| DLEU7-AS1 | 3 | chr13 |
| CDH4      | 4 | chr20 |
| IQGAP1    | 1 | chr15 |
| FERMT1    | 1 | chr20 |
| LAMC3     | 1 | chr9  |
| DLG2      | 1 | chr11 |
| SDK2      | 1 | chr17 |
| GALNTL6   | 1 | chr4  |
| DPP10     | 1 | chr2  |
| THEG      | 2 | chr19 |
| CAMK1D    | 2 | chr10 |
| ZBTB43    | 1 | chr9  |
| TMEM201   | 1 | chr1  |
| NMU       | 1 | chr4  |
| ATP9A     | 1 | chr20 |
| GALK2     | 1 | chr15 |
| RPRD2     | 4 | chr1  |
| ZNF565    | 1 | chr19 |
| PARK2     | 2 | chr6  |
| RADIL     | 1 | chr7  |
| PDE4B     | 1 | chr1  |

**site locations**

81232273  
53832854,53832864,53833078,53833082,53833127,53833131,53833132,53833143,5383314  
3621933  
41050290  
1493528,1511725  
177761376  
146030084  
5620733  
4622638  
161500455  
89832847,89858525  
22479988  
22290785  
133072766  
4211076  
204048147,204048221  
95088562  
23505467,23505575  
16624957  
63328784  
16269140,16269141  
24516752,24832885  
188219351  
215867783  
72836951,72837000  
3281296  
19583733  
89180081  
5587837  
7907571  
120798926  
68169686  
87974503  
22168216  
114555024  
770493  
54036817,54036818  
138268233  
152077845  
1196184  
52995043  
157876915,157913475,157932677

184848069  
4887677  
140219998  
135341357  
53922182  
104194278  
152859642  
76185796,76186886  
2871451  
47399600  
152276148,152276670  
1534387  
110343617  
79494991,79495020,79495022,79495036,79495047  
74009153  
3434261  
1023891  
81013035  
120150195  
14260075  
2418071  
31841757  
418675  
49440896  
119206373  
59938978  
90771703  
151078769,151078775,151078793,151078803,151078848,151078852  
156189625  
9126976  
66479904,66479905  
45068112  
156878421,156883491  
50256539,50256869,50257378  
22923992  
5998328,5998366  
1917127  
56732799,56733571  
43457167  
49183703  
242615470  
29456667,29503557  
4804152

49307524  
43620580  
6681743  
3439415,3464711  
143208214  
144877833  
2798848  
68821860,68853503  
128671100  
44280703,44290375  
76054960  
39366036  
25978582  
1164139,1169021  
45339200,45339208,45344326  
11988839  
2261683  
43101270  
2829476  
145252482  
8042079,8053059  
62049177  
56656775  
4804152  
2310576  
156189625  
120538685  
184564197  
129280064  
35302603,35332660  
1649416,1663210  
42990074  
179145862  
41597379  
640726  
235333172,235333173  
75639854  
138656229  
19693869  
21134595,21134596,21361300  
17686898  
33036695  
65155426



4512512  
149795690  
43923161  
696500,696502  
75372848  
61609749  
48803931  
119533732  
1999678  
45117629  
179581,179623,179642,179644,179653  
73569776  
99137831  
28296877  
39854307  
35509160  
245227092  
7013945  
51744256  
70775172  
133420273,133452074,133453540  
524881,531139  
233770144  
16161030  
32980924  
123926393  
31826545  
122248709  
13571929  
146273193  
16505604  
65220461  
3101637,3101817  
105170221,105171845  
44421872  
5047192  
82732688  
39400107  
10247268  
804612  
242584161  
25347469  
236613477

151390749,151393353  
158879966  
116999307  
11803928  
47975939  
78357293,78261500  
32180470  
60192106  
24301369,24301380  
146050135  
135716507  
55874093  
59803822  
58560322,58610256,58610257  
111342297  
76862024  
57521544  
235600208  
71797711  
74009153  
134188872  
5744912  
114821703  
80728061  
78261500  
131855536  
60372869  
1712978  
70570289  
234664070  
57552264  
33626235  
100667714  
40518778  
8233264  
102804691  
1249185  
234664070  
101694275,101858142,101892327  
29202024,29827515,29880980  
11591802  
98259396  
41585571

52985695  
6459396,7013945  
37552988  
143608582  
57552264  
117698417  
88074459  
1042396  
120270180  
78492204  
5152786  
5075224  
107243558  
55965167  
57290845,57274149  
234664070  
234664070  
1777815,1778321  
25064191  
42805236  
87119397  
222873966  
56511221  
117316047  
49022886  
73480218  
202638788,202638789  
60166217,60372869  
70837080  
44838660  
196634118,196634119  
151615685  
136199464,136199465,136199502  
70886007  
61547236,61547237  
101393295  
15568514  
62199258  
63859699  
45041118  
177686896  
10798255  
14423492,14423493,14759025

34060801  
49517215  
93364910  
77674633,77683125  
1316894  
28149330,29110581  
237123475  
3523747  
8541630  
36893856  
2903751,2903798  
41893322  
121661688  
8042079,8053059  
105170221  
25638407  
12249019  
75279846  
2522390,2522391  
167182469,167182470,167196063  
8808057  
22896102  
183713816  
1391234  
66733266,66733338  
31133655  
28550653  
73319512  
4094774,4102448  
64314779  
70736751  
54933103  
3148019,3147079  
60598912  
174410846  
166866088  
27138950  
40992931  
73723166  
39774944  
134436761  
69063476  
16746656

80988416,80988417  
1206496,1206503  
100260559,100260560  
170060146  
29485475  
95741647  
48526703  
1129439,1129485  
119315721,119363071  
20111266,20111267  
89719633  
15576600  
27491291  
3694380  
15699077  
126715435  
92622010  
13695712  
40082538,40060205  
2131565  
57290845,57274149  
25820890  
133169726  
132558689,132558761  
5101814  
8042079,8053059  
40459032  
7351443,7443240,7738401  
194077617  
129743452  
15770642,15770643  
32661824  
98812969,98827209,98862375,98862392  
136308542,136300712  
4399114  
7344728  
1804894,1804901,1804910,1804916,1804959  
94003834  
39609804  
34711337  
99058795  
152807424  
121881846,121881847,121891696

55521935  
121164388,121206075  
136119354  
239048965  
677899  
43318993  
66282150  
139904754  
5389713  
45117629  
6099086  
1475063,1475087,1475107,1475129,1475161  
132329206  
5355940,5361230,5427848  
105167535  
61519232,61520723  
239997710,240295801,240295802  
90425672  
159324406  
59368387  
129718127  
124011285  
1252535  
45281775  
21301178,21330991  
21183608  
183906828  
112505108  
1708771  
55054206,55054211  
29780291  
50624821  
42589916  
62417145  
49629845,49636805  
111527986  
58610256,58610257  
3644890,3648757  
1168540  
75528578  
100684925  
76859102  
60728953

161251918  
108566049  
187581092  
140653360  
31538956,31693693,32603677  
31318743  
35698489  
77879657  
92577340  
44152788  
130157394  
90425672  
146929217  
65867128  
15501131  
47853840  
33021466,33021467  
11566772  
139251480  
35558831  
75611354,75614294  
8449258  
2942171  
45406290  
178331204  
122737256  
35442519  
19573205  
2214430  
60898505,60907895,60926221,60930091,60938308  
3526496,3533273  
99656046  
57925285  
19617234  
24341072  
70617317  
168458072,168458073,168474308,168479602  
70425842,70425843,70437604  
33466306  
18977943  
52077715  
29839695  
14099081

134230643  
2876748  
19239431  
63885704  
19412346  
66282150  
39271537,39271538  
39233975  
42326258  
79268260  
121191208,121213135  
47508572,47185263,47552521,47557636  
2187851  
75438233,75444572  
3767265  
24324808  
75893633  
2717620  
185037323  
143373004,143382143  
107701980,107745702  
4894110,4894170  
48131308  
31538956,31693693  
65063262  
88619806  
3227502,3277484  
70054057  
50311412  
72801122  
140466814  
42837883,42837904,42862811,42863013,42863209,42863215  
95737647  
95845082  
55593164  
122181796  
51417503,51417508,51417534  
15963671  
121088884  
28149330  
136131436,136133712  
50960192  
2904202



122687143  
37159441,37159532  
41122515  
68514554,68514586  
144941419  
151731479  
1777815,1778321  
1044953  
40314967  
74509345  
5864583  
15467777  
101098047  
5338900  
536685  
35970527  
10338746  
77202644,77202645  
245381025,245393901,245715801  
43744893  
101924539  
6465694  
7663229  
18236885  
102277204  
234664070  
119571087  
67347339  
43985515  
18671899  
23780424  
157818754,157799746,158109457  
132222754  
77714227  
7594158  
736017,736018  
28668377  
234664070  
29499634  
50781389  
14260075  
57283974  
84560741

133601687,133601824  
23739315  
11353695  
24014551  
76185796,76186886,76198457  
195925355,195933370  
43010738  
80885897,80885901,80885910,80885924,80885930,80885933,80885952,80885978,8088598  
136271554  
152192113,152192631  
4351596  
178701724,178583157,178736617  
5683649  
1227719  
5620733  
6224779  
57249091  
178051  
10554358  
1786266  
74294757  
234664070  
1429396  
77749093  
212842332  
13810619  
49701981  
41813055  
24801314  
22160709  
234664070  
53537264  
3615047  
3053685  
55495378  
84212710  
54036817,54036818  
70528243,70425842,70425843,70437604  
228491315  
43165015  
55869568  
3018925  
153648928

60969884  
9130196,9132751  
178192902  
21727748  
39070929  
81192339,81232273  
48950880  
168458072,168458073,168474308  
2522390,2522391  
54500140  
38627237  
178906215  
150194484,150202102  
13985586  
239929360  
70526843,70585373  
43923161  
26511115  
82108898  
214822  
104621144  
54198305  
15258423  
101106210  
1151618  
108298305  
3423441  
26440941  
1898937  
72350966  
33097876  
1666807  
18699964,18699968,18699970,18699999,18700008  
201708421  
53885310  
73406357  
183260073  
1219701  
11737881  
1042295,1064333  
112525024  
73669043  
48689799

108011588  
91265664,91265665  
69656327,69656328  
99003603  
156367299  
139132985  
128611281,128611282  
46511616  
33724902  
234897813  
3234979  
63885704  
893295  
88793810,88793842  
1643950  
48803931  
159789608  
136340458  
82108898  
196659961  
230848701  
21361300  
23532031  
28367369  
22471822,22471823  
20641659,20641660  
29310431  
28256783  
6425758,6442198,6442210,6442238  
241528926,241537047,241531172  
225394812  
70837080  
125448959,125455371,125455372  
140653360,140687120  
4916935  
61490244,61458594  
17339225  
5055995,5127897  
155323907  
117846079,117846080  
33652116  
21883429  
50239356,50239403,50239404

84140719,84140723,84140777  
25803230  
130561262,130561278  
94620569  
97979532,97979533  
29190137  
154302293  
19440536,19440537  
138973585  
51417503,51417508,51417534  
59897399,59876123,60166217,60372869  
90964322  
6062988  
133906248  
83553637  
71478052  
173103159  
115594262  
370596,370641  
12412836,12412837  
129579823  
9672089  
56469894  
50288630  
49458652  
150375271,150410977,150423966,150423967  
36680376  
162539208,162539213  
4857396  
66630076

6,53833166,53833177



























0,80885982,80885994,80886143,80886147

| <b>Gene name</b> | <b>number of high covariance sites</b> | <b>chromosome</b> |
|------------------|----------------------------------------|-------------------|
| USP37            | 2                                      | chr2              |
| MARS             | 1                                      | chr12             |
| PARVB            | 1                                      | chr22             |
| WARS2            | 1                                      | chr1              |
| GRAMD1A          | 1                                      | chr19             |
| SPTBN4           | 1                                      | chr19             |
| HSPG2            | 1                                      | chr1              |
| ZNF517           | 1                                      | chr8              |
| ARRB2            | 1                                      | chr17             |
| MAP3K4           | 1                                      | chr6              |
| INTS2            | 1                                      | chr17             |
| SEMA7A           | 1                                      | chr15             |
| GALNS            | 1                                      | chr16             |
| BCL2             | 1                                      | chr18             |
| GORASP2          | 1                                      | chr2              |
| FZR1             | 1                                      | chr19             |
| SIPA1L3          | 3                                      | chr19             |
| LOC100288637     | 1                                      | chr15             |
| HCN2             | 1                                      | chr19             |
| PEAR1            | 3                                      | chr1              |
| ABCB10           | 1                                      | chr1              |
| KIAA1609         | 1                                      | chr16             |
| CD97             | 1                                      | chr19             |
| OSBP2            | 1                                      | chr22             |
| PKNOX2           | 2                                      | chr11             |
| PPP4R1L          | 1                                      | chr20             |
| PIK3C2B          | 2                                      | chr1              |
| ATP11A           | 1                                      | chr13             |
| KCNAB2           | 1                                      | chr1              |
| LINC00661        | 1                                      | chr19             |
| RECQL5           | 1                                      | chr17             |
| ABCC5            | 2                                      | chr3              |
| ERBB4            | 1                                      | chr2              |
| ELOVL2           | 1                                      | chr6              |
| TMEM184A         | 2                                      | chr7              |
| GTPBP3           | 1                                      | chr19             |
| TAF2             | 1                                      | chr8              |
| TRPM7            | 1                                      | chr15             |
| ANKRD20A9P       | 1                                      | chr13             |
| DNAH2            | 1                                      | chr17             |
| ZNF611           | 1                                      | chr19             |
| AATK             | 1                                      | chr17             |

|              |   |       |
|--------------|---|-------|
| CDH12        | 1 | chr5  |
| C9orf171     | 1 | chr9  |
| ENTPD6       | 1 | chr20 |
| AK8          | 1 | chr9  |
| CLOCK        | 1 | chr4  |
| C14orf159    | 1 | chr14 |
| RHPN1        | 1 | chr8  |
| ONECUT2      | 1 | chr18 |
| MSANTD1      | 2 | chr4  |
| FO XK2       | 1 | chr17 |
| MYRF         | 2 | chr11 |
| PCSK6        | 2 | chr15 |
| UGGT2        | 1 | chr13 |
| LINC00616    | 2 | chr4  |
| IQCG         | 1 | chr3  |
| USP40        | 1 | chr2  |
| INPP5A       | 2 | chr10 |
| DOCK8        | 1 | chr9  |
| CCDC146      | 1 | chr7  |
| DIS3L2       | 1 | chr2  |
| CMTM5        | 1 | chr14 |
| VIPR1        | 1 | chr3  |
| TPCN1        | 1 | chr12 |
| MLL3         | 1 | chr7  |
| RGMA         | 2 | chr15 |
| SH3PXD2A     | 1 | chr10 |
| PNKD         | 1 | chr2  |
| BUB1B        | 2 | chr15 |
| OCLN         | 1 | chr5  |
| ALPL         | 1 | chr1  |
| CLEC17A      | 2 | chr19 |
| CIT          | 1 | chr12 |
| LOC100507373 | 1 | chr19 |
| CHST3        | 1 | chr10 |
| EPHA1-AS1    | 3 | chr7  |
| TNNT3        | 1 | chr11 |
| STX16-NPEPL1 | 1 | chr20 |
| KCND3        | 2 | chr1  |
| IGSF23       | 1 | chr19 |
| PRKCZ        | 1 | chr1  |
| ADCY9        | 1 | chr16 |
| CDH4         | 5 | chr20 |
| UGT1A4       | 1 | chr2  |

|               |   |       |
|---------------|---|-------|
| ZNF516        | 1 | chr18 |
| PMF1-BGLAP    | 1 | chr1  |
| GIGYF2        | 1 | chr2  |
| ZIC3          | 1 | chrX  |
| GRAMD4        | 1 | chr22 |
| DTNBP1        | 1 | chr6  |
| HDAC9         | 1 | chr7  |
| ZNF385B       | 1 | chr2  |
| TSHZ1         | 1 | chr18 |
| NOD1          | 1 | chr7  |
| GFRA1         | 1 | chr10 |
| KBTBD2        | 1 | chr7  |
| C20orf85      | 2 | chr20 |
| THOP1         | 1 | chr19 |
| FOXN3         | 1 | chr14 |
| SV2B          | 1 | chr15 |
| HTRA3         | 1 | chr4  |
| CCP110        | 1 | chr16 |
| C8orf74       | 1 | chr8  |
| ZDHHC19       | 1 | chr3  |
| DKFZp686O1327 | 1 | chr2  |
| ZNF282        | 3 | chr7  |
| KCNQ1         | 1 | chr11 |
| TPCN2         | 2 | chr11 |
| PRKAG3        | 2 | chr2  |
| AVPR1A        | 1 | chr12 |
| MYO15B        | 1 | chr17 |
| WDR4          | 2 | chr21 |
| DNAJC15       | 1 | chr13 |
| FAM20C        | 2 | chr7  |
| SLC43A2       | 1 | chr17 |
| SNX8          | 2 | chr7  |
| LINC00617     | 1 | chr14 |
| UBXN6         | 1 | chr19 |
| SORBS2        | 1 | chr4  |
| CYP2E1        | 2 | chr10 |
| TLL10         | 1 | chr1  |
| CMTM6         | 1 | chr3  |
| UGT1A7        | 1 | chr2  |
| NTN1          | 1 | chr17 |
| MYO1F         | 2 | chr19 |
| AP3D1         | 2 | chr19 |
| MIR548AO      | 1 | chr5  |

|              |   |       |
|--------------|---|-------|
| AOX1         | 1 | chr2  |
| SPAG16       | 1 | chr2  |
| HAGHL        | 1 | chr16 |
| TCEAL2       | 1 | chrX  |
| TRAPPC9      | 2 | chr8  |
| CBFB         | 1 | chr16 |
| CBFA2T3      | 1 | chr16 |
| TLN2         | 2 | chr15 |
| KIAA1211     | 1 | chr4  |
| MICAL3       | 3 | chr22 |
| CDH4         | 3 | chr20 |
| POLDIP3      | 1 | chr22 |
| FAM109B      | 1 | chr22 |
| GRIK1        | 1 | chr21 |
| GUSBP11      | 1 | chr22 |
| CANX         | 1 | chr5  |
| FAM189A1     | 2 | chr15 |
| RGS9BP       | 1 | chr19 |
| SMIM14       | 1 | chr4  |
| NUGGC        | 1 | chr8  |
| RBFOX1       | 2 | chr16 |
| ADRA1D       | 1 | chr20 |
| LOC100132273 | 2 | chr22 |
| SELM         | 1 | chr22 |
| SBNO2        | 1 | chr19 |
| RNGTT        | 1 | chr6  |
| VAV2         | 2 | chr9  |
| MYO10        | 1 | chr5  |
| LOXL2        | 1 | chr8  |
| RPN1         | 1 | chr3  |
| SYNPO2       | 2 | chr4  |
| UHRF1        | 1 | chr19 |
| CDON         | 1 | chr11 |
| TTC40        | 1 | chr10 |
| TMEM220-AS1  | 1 | chr17 |
| ANKRD33B     | 1 | chr5  |
| LOC653712    | 1 | chr3  |
| SRCAP        | 1 | chr16 |
| MGMT         | 4 | chr10 |
| PHF13        | 1 | chr1  |
| MDGA2        | 1 | chr14 |
| NLRP3        | 1 | chr1  |
| HSH2D        | 2 | chr19 |

|               |   |       |
|---------------|---|-------|
| ABCA2         | 1 | chr9  |
| CACNA1G       | 2 | chr17 |
| C1orf151-NBL1 | 1 | chr1  |
| URGCP         | 1 | chr7  |
| TMTC2         | 1 | chr12 |
| LAMC3         | 3 | chr9  |
| SFTA3         | 1 | chr14 |
| NR1I2         | 1 | chr3  |
| TBL1X         | 1 | chrX  |
| ABL1          | 1 | chr9  |
| MAGI1         | 1 | chr3  |
| GABRA5        | 1 | chr15 |
| FRMD1         | 1 | chr6  |
| PKP4          | 1 | chr2  |
| BRSK2         | 1 | chr11 |
| LRP1B         | 2 | chr2  |
| MPPED2        | 1 | chr11 |
| PDE1C         | 1 | chr7  |
| ALX4          | 1 | chr11 |
| CELSR1        | 1 | chr22 |
| HNF4A         | 1 | chr20 |
| CTNNA3        | 1 | chr10 |
| CEP85         | 1 | chr1  |
| ZFP42         | 1 | chr4  |
| TSPEAR        | 1 | chr21 |
| DLEU7-AS1     | 2 | chr13 |
| GZMM          | 1 | chr19 |
| ZNF346        | 1 | chr5  |
| LINC00478     | 1 | chr21 |
| LIN52         | 1 | chr14 |
| IL1RAPL1      | 2 | chrX  |
| GLTSCR1       | 1 | chr19 |
| SKIV2L2       | 1 | chr5  |
| JRK           | 1 | chr8  |
| DIP2C         | 2 | chr10 |
| SLC4A7        | 1 | chr3  |
| TCERG1L       | 1 | chr10 |
| ULK4          | 2 | chr3  |
| PTPRT         | 2 | chr20 |
| C1orf94       | 1 | chr1  |
| RYR3          | 2 | chr15 |
| MMEL1         | 2 | chr1  |
| GRK1          | 1 | chr13 |

|              |   |       |
|--------------|---|-------|
| CORO7-PAM16  | 1 | chr16 |
| DAGLA        | 4 | chr11 |
| CNPY1        | 1 | chr7  |
| ZSCAN1       | 2 | chr19 |
| PLEKHG1      | 1 | chr6  |
| MICAL3       | 2 | chr22 |
| RYR2         | 2 | chr1  |
| ATG4B        | 1 | chr2  |
| CAMTA1       | 4 | chr1  |
| TNIP2        | 1 | chr4  |
| SH3RF3       | 1 | chr2  |
| UGT1A6       | 1 | chr2  |
| KCNJ15       | 1 | chr21 |
| COPS4        | 1 | chr4  |
| FUT8         | 1 | chr14 |
| SYS1-DBNDD2  | 1 | chr20 |
| B3GALT6      | 1 | chr1  |
| CLPTM1       | 2 | chr19 |
| ASPSCR1      | 1 | chr17 |
| PDSS1        | 2 | chr10 |
| CDC42SE2     | 1 | chr5  |
| SEL1L3       | 1 | chr4  |
| NRXN3        | 1 | chr14 |
| ERCC8        | 1 | chr5  |
| AP1M1        | 2 | chr19 |
| PTPRG        | 1 | chr3  |
| CHID1        | 1 | chr11 |
| USP48        | 2 | chr1  |
| RBM25        | 2 | chr14 |
| TNFRSF19     | 1 | chr13 |
| GGT1         | 1 | chr22 |
| NTNG1        | 1 | chr1  |
| FAM83E       | 1 | chr19 |
| CMTM2        | 1 | chr16 |
| PIGN         | 1 | chr18 |
| DOK6         | 2 | chr18 |
| KCTD8        | 1 | chr4  |
| INTS1        | 3 | chr7  |
| PDGFRL       | 1 | chr8  |
| SLC45A1      | 1 | chr1  |
| BIN1         | 1 | chr2  |
| LOC100286922 | 1 | chr2  |
| KHDC1        | 1 | chr6  |



|              |   |       |
|--------------|---|-------|
| CYGB         | 1 | chr17 |
| ITIH3        | 2 | chr3  |
| CCDC85C      | 1 | chr14 |
| PLEKHG4B     | 1 | chr5  |
| LINC00693    | 1 | chr3  |
| STX8         | 1 | chr17 |
| METTL8       | 1 | chr2  |
| WVOX         | 1 | chr16 |
| EIF4G3       | 2 | chr1  |
| TRPM4        | 1 | chr19 |
| ADAMTS17     | 1 | chr15 |
| TIMD4        | 1 | chr5  |
| LOC100133669 | 1 | chr8  |
| DENND1A      | 1 | chr9  |
| PARVG        | 1 | chr22 |
| MIR548AI     | 1 | chr14 |
| PRDM16       | 1 | chr1  |
| GIPC2        | 1 | chr1  |
| XKR4         | 1 | chr8  |
| AP2A2        | 2 | chr11 |
| MIR143HG     | 1 | chr5  |
| CHD1         | 1 | chr5  |
| LRRC4B       | 1 | chr19 |
| AGAP1        | 1 | chr2  |
| DDX12P       | 1 | chr12 |
| ZNF578       | 1 | chr19 |
| LRRC20       | 1 | chr10 |
| TMPRSS11F    | 1 | chr4  |
| USP35        | 1 | chr11 |
| SFMBT1       | 2 | chr3  |
| CTNND1       | 1 | chr11 |
| CLYBL        | 3 | chr13 |
| PRCD         | 1 | chr17 |
| ADAMTS2      | 3 | chr5  |
| CNTLN        | 1 | chr9  |
| PDZD4        | 1 | chrX  |
| PHIP         | 1 | chr6  |
| RTN4RL1      | 2 | chr17 |
| NAGPA        | 1 | chr16 |
| MMP17        | 4 | chr12 |
| DET1         | 1 | chr15 |
| COTL1        | 2 | chr16 |
| MAFK         | 1 | chr7  |

|           |   |       |
|-----------|---|-------|
| KRT72     | 2 | chr12 |
| MIR5095   | 1 | chr20 |
| ANKRD30BL | 2 | chr2  |
| EFHA1     | 1 | chr13 |
| PRTG      | 1 | chr15 |
| CRELD2    | 1 | chr22 |
| MGAT4C    | 1 | chr12 |
| RGS6      | 1 | chr14 |
| SLC25A25  | 3 | chr9  |
| N4BP3     | 3 | chr5  |
| CTSD      | 2 | chr11 |
| ADCY3     | 1 | chr2  |
| GLTSCR1L  | 1 | chr6  |
| YEATS2    | 1 | chr3  |
| TTC7B     | 1 | chr14 |
| CDH18     | 2 | chr5  |
| CUL1      | 1 | chr7  |
| AGAP1     | 2 | chr2  |
| FAM71E1   | 1 | chr19 |
| LINGO2    | 3 | chr9  |
| SYNPR     | 1 | chr3  |
| PEBP4     | 1 | chr8  |
| MADCAM1   | 1 | chr19 |
| TGS1      | 1 | chr8  |
| COL26A1   | 1 | chr7  |
| LINC00840 | 1 | chr10 |
| SNX27     | 1 | chr1  |
| LOC286059 | 1 | chr8  |
| CPA6      | 1 | chr8  |
| ZNF280C   | 1 | chrX  |
| NFASC     | 1 | chr1  |
| MOK       | 1 | chr14 |
| PPFIA1    | 1 | chr11 |
| SYT2      | 2 | chr1  |
| BCYRN1    | 1 | chrX  |
| DAG1      | 1 | chr3  |
| KIAA1217  | 1 | chr10 |
| LPHN1     | 2 | chr19 |
| PQLC1     | 2 | chr18 |
| GRM4      | 1 | chr6  |
| CACNA1A   | 1 | chr19 |
| TRAPPC8   | 1 | chr18 |
| UGT1A8    | 1 | chr2  |

|                |   |       |
|----------------|---|-------|
| P2RX4          | 1 | chr12 |
| LINC00674      | 1 | chr17 |
| ITGAL          | 1 | chr16 |
| GNG7           | 1 | chr19 |
| ISY1-RAB43     | 1 | chr3  |
| CDT1           | 1 | chr16 |
| LOXL3          | 1 | chr2  |
| MBOAT1         | 1 | chr6  |
| CTPS2          | 1 | chrX  |
| PATZ1          | 1 | chr22 |
| C15orf38-AP3S2 | 1 | chr15 |
| WDR72          | 2 | chr15 |
| C16orf45       | 2 | chr16 |
| LOC283692      | 1 | chr15 |
| MYO7B          | 1 | chr2  |
| KIAA1614       | 1 | chr1  |
| GNB1L          | 1 | chr22 |
| MSRA           | 1 | chr8  |
| AQP1           | 1 | chr7  |
| FAM83A         | 2 | chr8  |
| AGBL1          | 1 | chr15 |
| AKAP13         | 1 | chr15 |
| CACNA1C        | 1 | chr12 |
| PLEKHH1        | 1 | chr14 |
| ZNF284         | 1 | chr19 |
| FAM53B         | 1 | chr10 |
| CDK14          | 2 | chr7  |
| SLC9A9         | 1 | chr3  |
| TAF4           | 1 | chr20 |
| MACROD1        | 1 | chr11 |
| CPNE7          | 1 | chr16 |
| NEK1           | 1 | chr4  |
| HSPA7          | 1 | chr1  |
| BTBD16         | 1 | chr10 |
| BRD1           | 1 | chr22 |
| CTBP1          | 5 | chr4  |
| FAM53A         | 1 | chr4  |
| LOC729852      | 1 | chr7  |
| GPR125         | 1 | chr4  |
| KIF1A          | 1 | chr2  |
| TMEM8A         | 1 | chr16 |
| TMEM44         | 1 | chr3  |
| TSNARE1        | 2 | chr8  |

|                |   |       |
|----------------|---|-------|
| SRSF4          | 1 | chr1  |
| DNAH17         | 1 | chr17 |
| PCDH9          | 2 | chr13 |
| RBMS3          | 1 | chr3  |
| C22orf34       | 1 | chr22 |
| ESR2           | 1 | chr14 |
| MECOM          | 1 | chr3  |
| TRIM25         | 1 | chr17 |
| SLC39A6        | 1 | chr18 |
| KALRN          | 1 | chr3  |
| FAR1           | 1 | chr11 |
| ZNF664-FAM101A | 1 | chr12 |
| JAK1           | 1 | chr1  |
| TCF7L1         | 1 | chr2  |
| TMED10         | 1 | chr14 |
| CCNG1          | 1 | chr5  |
| FRMD5          | 1 | chr15 |
| CHEK2          | 1 | chr22 |
| COLEC11        | 3 | chr2  |
| LRRTM4         | 1 | chr2  |
| ZNF890P        | 1 | chr7  |
| COL25A1        | 1 | chr4  |
| UBE2H          | 1 | chr7  |
| LRRC4C         | 1 | chr11 |
| LRRC15         | 1 | chr3  |
| CCDC88C        | 1 | chr14 |
| IRF2           | 1 | chr4  |
| CORO7          | 1 | chr16 |
| GFOD1          | 1 | chr6  |
| PLIN3          | 1 | chr19 |
| GLB1           | 1 | chr3  |
| KIAA2026       | 1 | chr9  |
| C16orf62       | 1 | chr16 |
| RPF2           | 2 | chr6  |
| C2orf83        | 1 | chr2  |
| LOC100873065   | 1 | chrX  |
| LINC00673      | 1 | chr17 |
| IFNAR1         | 1 | chr21 |
| RPS6KA2        | 1 | chr6  |
| SAMD1          | 1 | chr19 |
| SNX14          | 1 | chr6  |
| CCDC113        | 1 | chr16 |
| AHRR           | 1 | chr5  |

|              |    |       |
|--------------|----|-------|
| CUL3         | 1  | chr2  |
| C2CD2        | 1  | chr21 |
| H6PD         | 1  | chr1  |
| ANKRD24      | 1  | chr19 |
| RIN1         | 1  | chr11 |
| UGT1A5       | 1  | chr2  |
| D2HGDH       | 1  | chr2  |
| PMF1         | 1  | chr1  |
| LINC00162    | 1  | chr21 |
| ADNP2        | 1  | chr18 |
| TOM1L1       | 1  | chr17 |
| FLT4         | 1  | chr5  |
| EFR3B        | 1  | chr2  |
| ANKFY1       | 1  | chr17 |
| R3HCC1L      | 1  | chr10 |
| GABBR2       | 2  | chr9  |
| ABLIM2       | 1  | chr4  |
| TUBB3        | 1  | chr16 |
| GLT1D1       | 2  | chr12 |
| ZNF169       | 1  | chr9  |
| C9orf114     | 1  | chr9  |
| TMEM63A      | 1  | chr1  |
| ABCB5        | 1  | chr7  |
| NEBL         | 1  | chr10 |
| LAMA4        | 1  | chr6  |
| GPATCH8      | 1  | chr17 |
| MACROD2      | 2  | chr20 |
| SYT1         | 3  | chr12 |
| SVIL         | 1  | chr10 |
| FGF13        | 13 | chrX  |
| FBXL20       | 2  | chr17 |
| C1orf106     | 1  | chr1  |
| CMPK1        | 1  | chr1  |
| KIRREL3      | 1  | chr11 |
| MSH2         | 1  | chr2  |
| FAM211B      | 1  | chr22 |
| POC1B        | 1  | chr12 |
| CDH1         | 1  | chr16 |
| CTNND2       | 1  | chr5  |
| CNOT1        | 2  | chr16 |
| GPR98        | 1  | chr5  |
| LOC100128946 | 1  | chr22 |
| BOC          | 1  | chr3  |

|          |   |       |
|----------|---|-------|
| MUC17    | 1 | chr7  |
| MLF1     | 1 | chr3  |
| MRC2     | 1 | chr17 |
| BTBD2    | 1 | chr19 |
| BICD1    | 1 | chr12 |
| GAS6     | 4 | chr13 |
| ASCL3    | 1 | chr11 |
| RPTOR    | 3 | chr17 |
| ZBTB46   | 1 | chr20 |
| MACROD2  | 4 | chr20 |
| DNAL4    | 1 | chr22 |
| CDH3     | 1 | chr16 |
| ADCK3    | 1 | chr1  |
| SUV420H2 | 1 | chr19 |
| PLD5     | 1 | chr1  |
| STK25    | 1 | chr2  |
| MIR548AN | 1 | chr13 |
| AP3S2    | 1 | chr15 |
| CHODL    | 1 | chr21 |
| BPTF     | 1 | chr17 |
| COL14A1  | 1 | chr8  |
| FLJ33534 | 1 | chr2  |
| PVRL1    | 1 | chr11 |
| SORCS2   | 1 | chr4  |
| CACNA1H  | 5 | chr16 |
| LIN54    | 1 | chr4  |
| LDLRAD4  | 2 | chr18 |
| SEC14L1  | 1 | chr17 |
| PCNXL2   | 1 | chr1  |
| TCF20    | 1 | chr22 |
| VGLL4    | 1 | chr3  |
| LYPD6B   | 1 | chr2  |
| AGPS     | 1 | chr2  |
| B4GALT1  | 2 | chr9  |
| KIAA1755 | 3 | chr20 |
| PTPRS    | 1 | chr19 |
| IFNL4    | 1 | chr19 |
| NUBPL    | 1 | chr14 |
| NUDCD1   | 1 | chr8  |
| RTFDC1   | 1 | chr20 |
| SLC12A3  | 1 | chr16 |
| EML1     | 1 | chr14 |
| NELFB    | 1 | chr9  |

|            |   |       |
|------------|---|-------|
| DCTN2      | 1 | chr12 |
| FBLN1      | 2 | chr22 |
| ERMAP      | 1 | chr1  |
| SEC14L5    | 2 | chr16 |
| MIPEP      | 1 | chr13 |
| SYNGR3     | 1 | chr16 |
| SMC1B      | 1 | chr22 |
| PDZD2      | 1 | chr5  |
| ASAP1      | 2 | chr8  |
| NPEPL1     | 1 | chr20 |
| NMT1       | 1 | chr17 |
| RREB1      | 1 | chr6  |
| STK3       | 2 | chr8  |
| GPHN       | 3 | chr14 |
| SPON1      | 1 | chr11 |
| ASIC4      | 1 | chr2  |
| HAUS7      | 2 | chrX  |
| ADARB2-AS1 | 1 | chr10 |
| POU4F1-AS1 | 1 | chr13 |
| KIAA2022   | 1 | chrX  |
| MICALL2    | 1 | chr7  |
| RAB40C     | 1 | chr16 |
| VSX2       | 1 | chr14 |
| MYO9B      | 1 | chr19 |
| LOC550113  | 1 | chr4  |
| LYRM4      | 1 | chr6  |
| PARK2      | 2 | chr6  |
| KCNK17     | 2 | chr6  |
| EPHA2      | 1 | chr1  |
| SMOX       | 1 | chr20 |
| HIBCH      | 1 | chr2  |
| ZNF804A    | 1 | chr2  |
| TBC1D30    | 1 | chr12 |
| KLHL21     | 1 | chr1  |
| PTPRE      | 1 | chr10 |
| MTMR6      | 1 | chr13 |
| UGT1A10    | 1 | chr2  |
| ANO1       | 2 | chr11 |
| ACAP3      | 2 | chr1  |
| C6orf147   | 1 | chr6  |
| TSPAN9     | 1 | chr12 |
| CLSTN2     | 2 | chr3  |
| MRPL45P2   | 2 | chr17 |

|            |   |       |
|------------|---|-------|
| UVSSA      | 2 | chr4  |
| SMAD6      | 1 | chr15 |
| ST3GAL1    | 1 | chr8  |
| EPB41L2    | 1 | chr6  |
| SLCO2B1    | 1 | chr11 |
| C1QTNF2    | 1 | chr5  |
| GRM5       | 1 | chr11 |
| SDK1       | 2 | chr7  |
| MAP2K2     | 1 | chr19 |
| EHMT1      | 2 | chr9  |
| KIAA1432   | 1 | chr9  |
| PIAS4      | 1 | chr19 |
| TMCO3      | 1 | chr13 |
| SLC36A1    | 3 | chr5  |
| COL23A1    | 6 | chr5  |
| DMD        | 1 | chrX  |
| PRKAR1B    | 1 | chr7  |
| ARL2-SNX15 | 1 | chr11 |
| TMPRSS15   | 1 | chr21 |
| CHMP6      | 1 | chr17 |
| TNRC18     | 1 | chr7  |
| PTPRN2     | 8 | chr7  |
| AASDH      | 1 | chr4  |
| MAD1L1     | 6 | chr7  |
| CABP1      | 1 | chr12 |
| CCT3       | 1 | chr1  |
| EYA2       | 1 | chr20 |
| VPS33A     | 1 | chr12 |
| NINL       | 2 | chr20 |
| ANP32B     | 1 | chr9  |
| PRR12      | 1 | chr19 |
| MKLN1      | 1 | chr7  |
| B4GALNT4   | 1 | chr11 |
| ARHGEF10   | 1 | chr8  |
| MOB2       | 2 | chr11 |
| RAB43      | 1 | chr3  |
| PIEZO1     | 2 | chr16 |
| EIF2AK4    | 1 | chr15 |
| DLGAP3     | 1 | chr1  |
| RSPH9      | 1 | chr6  |
| FAM19A5    | 1 | chr22 |
| UMODL1     | 1 | chr21 |
| DLEU7      | 2 | chr13 |



|            |    |       |
|------------|----|-------|
| GTF2IRD1   | 1  | chr7  |
| HMMR       | 1  | chr5  |
| TNFAIP2    | 1  | chr14 |
| SLCO5A1    | 1  | chr8  |
| CAMSAP3    | 1  | chr19 |
| TLL2       | 1  | chr10 |
| BEND2      | 1  | chrX  |
| ITGBL1     | 1  | chr13 |
| AP3B2      | 1  | chr15 |
| PIK3R5     | 1  | chr17 |
| DLGAP2     | 1  | chr8  |
| ERICH1-AS1 | 3  | chr8  |
| JAG2       | 11 | chr14 |
| MORN1      | 5  | chr1  |
| STK17B     | 1  | chr2  |
| NT5C3      | 1  | chr7  |
| SSU72      | 1  | chr1  |
| ZNF7       | 1  | chr8  |
| KCNA2      | 1  | chr1  |
| ATP9B      | 1  | chr18 |
| SEC14L1    | 2  | chr17 |
| INF2       | 1  | chr14 |
| CSMD1      | 2  | chr8  |
| DYSF       | 1  | chr2  |
| PCSK5      | 1  | chr9  |
| SEPSECS    | 1  | chr4  |
| DNAH8      | 3  | chr6  |
| EHD1       | 1  | chr11 |
| SKI        | 1  | chr1  |
| KAZN       | 2  | chr1  |
| UGT1A3     | 1  | chr2  |
| HDAC4      | 2  | chr2  |
| CIITA      | 1  | chr16 |
| RHPN1-AS1  | 1  | chr8  |
| NR5A2      | 1  | chr1  |
| C7orf50    | 1  | chr7  |
| BCL7A      | 1  | chr12 |
| APAF1      | 1  | chr12 |
| MEGF6      | 3  | chr1  |
| UHRF1BP1L  | 1  | chr12 |
| YIF1B      | 2  | chr19 |
| MTOR       | 1  | chr1  |
| CRISPLD2   | 1  | chr16 |

|          |   |       |
|----------|---|-------|
| MASP2    | 1 | chr1  |
| FLG      | 2 | chr1  |
| MCF2L    | 1 | chr13 |
| CHMP2A   | 1 | chr19 |
| HK1      | 1 | chr10 |
| MAEA     | 1 | chr4  |
| APBA3    | 1 | chr19 |
| TRA2A    | 1 | chr7  |
| FAM213B  | 2 | chr1  |
| IL20RA   | 1 | chr6  |
| CPT1A    | 1 | chr11 |
| SOGA3    | 1 | chr6  |
| MIR548F5 | 3 | chr13 |
| NPR3     | 2 | chr5  |
| NEURL4   | 1 | chr17 |
| FHIT     | 1 | chr3  |
| XRCC4    | 1 | chr5  |
| PITPNC1  | 1 | chr17 |
| LSP1     | 1 | chr11 |
| SNAPC5   | 1 | chr15 |
| BSN      | 1 | chr3  |
| QSOX2    | 1 | chr9  |
| GPR68    | 1 | chr14 |
| AFMID    | 1 | chr17 |
| CDAN1    | 1 | chr15 |
| GAPVD1   | 1 | chr9  |
| POR      | 1 | chr7  |
| PCSK6    | 1 | chr15 |
| DKK4     | 1 | chr8  |
| C3orf20  | 1 | chr3  |
| NAALADL2 | 2 | chr3  |
| ANO2     | 4 | chr12 |
| ITPR2    | 1 | chr12 |
| MKL2     | 1 | chr16 |
| TERT     | 1 | chr5  |
| TAZ      | 1 | chrX  |
| GPR133   | 3 | chr12 |
| SORCS1   | 2 | chr10 |
| TGFBRAP1 | 1 | chr2  |
| FCHO1    | 1 | chr19 |
| KIF26B   | 2 | chr1  |
| NCAM2    | 2 | chr21 |
| RXRA     | 2 | chr9  |

|              |   |       |
|--------------|---|-------|
| TUFT1        | 1 | chr1  |
| ANP32E       | 2 | chr1  |
| EXD3         | 1 | chr9  |
| PDE1A        | 1 | chr2  |
| CEP112       | 2 | chr17 |
| BNC2         | 2 | chr9  |
| ZNF175       | 1 | chr19 |
| URGCP-MRPS24 | 1 | chr7  |
| SHANK2       | 2 | chr11 |
| ESPL1        | 1 | chr12 |
| GABRB1       | 1 | chr4  |
| C1orf65      | 1 | chr1  |
| COLEC11      | 1 | chr2  |
| KAZN         | 1 | chr1  |
| CACNA1B      | 1 | chr9  |
| PCCA         | 1 | chr13 |
| NXN          | 1 | chr17 |
| GALNTL6      | 2 | chr4  |
| RGS12        | 1 | chr4  |
| HIVEP3       | 1 | chr1  |
| KIAA1751     | 1 | chr1  |
| KIF19        | 1 | chr17 |
| NRG3         | 1 | chr10 |
| TMEM45B      | 1 | chr11 |
| COL17A1      | 1 | chr10 |
| DNMT3B       | 2 | chr20 |
| PCDHB8       | 1 | chr5  |
| KCNG2        | 1 | chr18 |
| AGO2         | 1 | chr8  |
| KLHL6        | 1 | chr3  |
| SLC51A       | 1 | chr3  |
| STK11        | 1 | chr19 |
| MAD2L2       | 1 | chr1  |
| JARID2       | 1 | chr6  |
| TMX2-CTNND1  | 1 | chr11 |
| DNAJB13      | 1 | chr11 |
| KCNG4        | 1 | chr16 |
| KIF17        | 1 | chr1  |
| TBCD         | 2 | chr17 |
| FRMD1        | 2 | chr6  |
| HEPHL1       | 1 | chr11 |
| FAM32A       | 2 | chr19 |
| VGLL4        | 2 | chr3  |

|                |   |       |
|----------------|---|-------|
| PACSIN1        | 1 | chr6  |
| LINC00351      | 1 | chr13 |
| NFATC1         | 1 | chr18 |
| FAM101A        | 1 | chr12 |
| HTT            | 1 | chr4  |
| ACSL6          | 1 | chr5  |
| RERE           | 1 | chr1  |
| ABO            | 1 | chr9  |
| PLA2G3         | 1 | chr22 |
| AIDA           | 1 | chr1  |
| CPNE5          | 1 | chr6  |
| MAN2B2         | 1 | chr4  |
| SMOC1          | 1 | chr14 |
| C14orf178      | 1 | chr14 |
| APOC1          | 1 | chr19 |
| SLC2A6         | 1 | chr9  |
| NCS1           | 1 | chr9  |
| LOC285577      | 1 | chr5  |
| TXNRD2         | 1 | chr22 |
| IDO2           | 1 | chr8  |
| ARHGAP19-SLIT1 | 1 | chr10 |
| SOHLH1         | 1 | chr9  |
| CHST15         | 1 | chr10 |
| WDR19          | 2 | chr4  |
| TSPAN2         | 1 | chr1  |
| ADARB2         | 4 | chr10 |
| ARHGAP19       | 1 | chr10 |
| C20orf196      | 1 | chr20 |
| RAB36          | 3 | chr22 |
| RNF165         | 1 | chr18 |
| DOK2           | 1 | chr8  |
| RABL6          | 1 | chr9  |
| CXCR3          | 1 | chrX  |
| ST6GAL2        | 1 | chr2  |
| YWHAE          | 2 | chr17 |
| DPP6           | 1 | chr7  |
| SMOC2          | 2 | chr6  |
| CSE1L          | 1 | chr20 |
| SMIM5          | 1 | chr17 |
| NBEA           | 3 | chr13 |
| LOC339166      | 1 | chr17 |
| CDH6           | 1 | chr5  |
| ARVCF          | 1 | chr22 |

|           |   |       |
|-----------|---|-------|
| TNC       | 2 | chr9  |
| NRP2      | 1 | chr2  |
| CDH13     | 1 | chr16 |
| DHRS4L1   | 1 | chr14 |
| GRK5      | 1 | chr10 |
| UGT1A9    | 1 | chr2  |
| LARGE     | 2 | chr22 |
| ENGASE    | 1 | chr17 |
| CDKAL1    | 1 | chr6  |
| EPB41L4B  | 2 | chr9  |
| SLC12A7   | 1 | chr5  |
| TLR8-AS1  | 1 | chrX  |
| BCKDK     | 1 | chr16 |
| NBL1      | 1 | chr1  |
| TXLNA     | 1 | chr1  |
| DOT1L     | 2 | chr19 |
| CAMK1D    | 3 | chr10 |
| TNXB      | 1 | chr6  |
| DIRAS1    | 1 | chr19 |
| TJP2      | 1 | chr9  |
| ADAMTS2   | 2 | chr5  |
| PXDNL     | 2 | chr8  |
| MND1      | 1 | chr4  |
| RBFOX1    | 1 | chr16 |
| CPPED1    | 1 | chr16 |
| SAMD3     | 1 | chr6  |
| FAM129C   | 1 | chr19 |
| MIR17HG   | 1 | chr13 |
| GRIK1-AS1 | 1 | chr21 |
| ANKRD13C  | 2 | chr1  |
| LHPP      | 1 | chr10 |
| GAK       | 2 | chr4  |
| TFCP2     | 1 | chr12 |
| HSF1      | 1 | chr8  |
| FERMT1    | 1 | chr20 |
| ITPK1     | 1 | chr14 |
| EPS15L1   | 1 | chr19 |
| RIMBP2    | 2 | chr12 |
| DHX37     | 2 | chr12 |
| CACNA1D   | 1 | chr3  |
| DYSF      | 2 | chr2  |
| ADAMTS20  | 1 | chr12 |
| DPH1      | 1 | chr17 |

|         |   |       |
|---------|---|-------|
| PLAUR   | 1 | chr19 |
| ATP8A2  | 1 | chr13 |
| COL6A2  | 1 | chr21 |
| MLLT1   | 2 | chr19 |
| ARHGAP9 | 1 | chr12 |
| SLC15A4 | 1 | chr12 |
| SBF1    | 1 | chr22 |
| KCNN3   | 1 | chr1  |
| DGCR2   | 1 | chr22 |
| TNFRSF8 | 1 | chr1  |
| RPRD2   | 1 | chr1  |
| FIBCD1  | 4 | chr9  |
| MECOM   | 2 | chr3  |
| ALPK2   | 1 | chr18 |
| TMEM198 | 1 | chr2  |
| PIEZO2  | 1 | chr18 |
| CUX1    | 5 | chr7  |
| FRMPD4  | 1 | chrX  |

**site locations**

219328681,219404207  
57889227  
44515804  
119594662  
35502532  
41050290  
22204506  
146030084  
4622638  
161500455  
59992426  
74711409  
88920677  
60816889  
171793585  
3533273  
38554304,38697052,38697053  
31059156  
607040  
156878419,156878421,156883491  
229683263  
84514963  
14506631  
31261857  
125287393,125287394  
56845938  
204417023,204436065  
113398928  
6143145  
16126820  
73635178  
183713815,183713816  
212566718  
10995039  
1584078,1587041  
17449381  
120798926  
50935283  
19411480  
7671606  
53218181  
79134665

22345991  
135389134  
25202891  
135679280  
56372979  
91609462  
144461039  
55105191  
3255736,3255741  
80508538  
61547236,61547237  
101903335,101915394  
96580857  
138973585,138974330  
197665044  
234394486  
134423349,134550099  
274107  
76762264  
232933589  
23848310  
42568439  
113702376  
151998404  
93598438,93602036  
105480533  
219186591  
40501478,40507830  
68831858  
21892980  
14712665,14712697  
120150195  
14260075  
73767858  
143165992,143111464,143208214  
1943118  
57274149  
112525024,112525031  
45123944  
2041154  
4043240  
60283593,59832996,59866519,60454333,60454374  
234663626



74097118  
156189625  
233566677  
136648854  
47074257  
15576600  
18517936  
180540908  
72949954  
30510532  
117883900  
32909180  
56732799,56733571  
2810246  
89968426  
91762260  
8278123  
19558246  
10543484  
195925355  
145687183  
148904623,148904794,148909758  
2798848  
68821860,68853503  
219691685,219691758  
63543646  
73595712  
44280703,44290375  
43598340  
214822,226491  
1492198  
2291790,2293508  
96379614  
4453998  
186536056  
135341790,135341794  
1114171  
32527610  
234663626  
8993970  
8595660,8595688  
2131565,2131578  
92934607

201475722  
214490660  
779687  
101380931  
140930848,140968750  
67089494  
88991154  
62955265,62990409  
57080660  
18281728,18398207,18459859  
60283593,60454333,60454374  
42990074  
42473603  
31128568  
23995795  
179145862  
29516485,29452378  
33168604  
39624043  
27886902  
6384299,6869494  
4223453  
42492062,42492104  
31503149  
1148048  
89498970  
136778878,136665987  
16794914  
23155335  
128357764  
119898276,119898281  
4945917  
125854390  
134681693  
10660427  
10572060  
128587817  
30747191  
131323099,131323100,131316315,131320233  
6681743  
47768048  
247582755  
16269140,16269141

139905818  
48689798,48689799  
19978899  
43923161  
83246130  
133906248,133906955,133906956  
36975759  
119533732  
9480685  
133593565  
65412778  
27128732  
168474308  
159519451  
1464589  
141337137,142022616  
30470360  
31991266  
44330555  
46839894  
43044775  
67854284  
26578979  
188918166  
45941327  
51417503,51417534  
547559  
176484225  
17725744  
74646222  
29784212,28765650  
48205286  
54671147  
143747271  
444996,670243  
27421654  
132976407  
41962818,41882537  
41159390,41249375  
34642383  
33609541,33993318  
2522201,2522203  
114432861

4435161  
61490244,61456424,61458594,61494325  
155323907  
58545712,58545730  
151085415  
18398207,18459859  
237382689,237263846  
242584161  
7633798,7114720,7639870,7742833  
2743980  
109973837  
234663626  
39631463  
83977812  
65979455  
44023437  
1168532  
45488093,45490426  
79959659  
27015760,27015761  
130638028  
25853367  
79562574  
60192106  
16335739,16339715  
61615095  
888631  
22100962,22100963  
73526987,73580257  
2415527  
24983263  
108011590  
49106994  
66613524  
59803822  
67361031,67355844  
44421784  
1532399,1534145,1534146  
17453738  
8392394  
127861446  
234663626  
74009153

74529576  
52837554,52837614  
100026843  
163768  
28668377  
9465495  
172265745  
78357293  
21134595,21134596  
49669421  
100667714  
156367299  
144081249  
126682467  
44596205  
29968344  
3279800  
78516538  
56295504  
1001560,1002229  
148807225  
98259396  
51051276  
236754256  
9588490  
52985695  
72083976  
68932568  
77903267  
53000108,53000115  
57552264  
100545379,100260559,100260560  
74529576  
178701724,178576680,178689460  
17290868  
153073318  
79701971  
1841741,1921953  
5075224  
132329206,132326291,132334754,132334766  
89067474  
84608934,84615224  
1574811

52995043,52995070  
55965167  
133014095,133014097  
22069818  
55917965  
50318505  
86995791  
72793575  
130845150,130841923,130842141  
177548186,177548195,177548237  
1777815,1778321  
25064191  
42805236  
183493990  
91024464  
19573547,19573576  
148480233  
236754256,237021344  
50974035  
28476494,28476508,28476562  
63269641  
22749343  
502552  
56736652  
101119953  
44373190  
151615685  
22927142  
68454160  
129385813  
204828056  
102733210  
70194623  
202638788,202638789  
70837080  
49517215  
24832885  
14260075,14310797  
77674633,77683125  
34101235  
13397703  
29457371  
234663626

121661688  
66130534  
30503727  
2601809  
128828168  
88871361  
74774061  
20116177  
16698090  
31724358  
90425672  
53833078,53833132  
15636141,15636155  
83338891  
128367090  
180897569  
19796766  
10280165  
30955122  
124219472,124219538  
87267293  
86184442  
2206970  
68045840  
44585591  
126320737  
90808839,90808842  
143207127  
60598912  
63836680  
89656043  
170435428  
161575910  
124089034  
50209854  
1222300,1222301,1224540,1224647,1227951  
1649416  
7836123  
22499723  
241686408  
427782  
194324731  
143333487,143358298

29485475  
76565604  
67197164,67197166  
29503557  
50044252  
64774314  
168839060  
54972399  
33697759  
123982970  
13695712  
124799642  
65415951  
85517291  
75621019  
162870234  
44305058  
29101828  
3645428,3648757,3660867  
77379705  
5175313  
109933638  
129534618  
40459032  
194077617  
91775504  
185311568  
4435161  
13430489  
4854735  
33128890  
5952240  
19656650  
111342297,111313236  
228491298  
22527642  
70526843  
34711337  
167196063  
14200242  
86280873  
58300770  
435782



225394812  
43318993  
9323909  
4190586  
66099987  
234663626  
242707659  
156189625  
46424361  
77879657  
53013356  
180043387  
25347469  
4165347  
99912060  
101226215,101226340  
8019279  
90001561  
129417210,129452098  
97036140  
131590069  
226057689  
20749914  
21183608  
112505108  
42552831  
15984559,15984564  
79368458,79368495,79368511  
29780291  
138136474,138277060,138277067,138277085,138277122,138277128,138277131,138277151  
37549199,37552988  
200863771  
47828187  
126453648  
47653645  
24983263  
89897387  
68787529  
11139358  
58610256,58610257  
89896790  
49277055  
112991312

100684925  
158319418  
60728953  
2000129  
32528150  
114555024,114555065,114558565,114558566  
8959545  
78597523,78683458,78793474  
62432152  
14423492,14423493,15984559,15984564  
39178374  
68696638  
227146132  
55856850  
242252838  
242436237  
100043086  
90425672  
19636791  
65867128  
121164388  
11264485  
119574608  
7498481  
1211221,1235312,1235322,1252217,1252243  
83896149  
13491894,13571929  
75185899  
233399444  
42574830  
11611732  
149980430  
178331204  
33132490,33132491  
36849007,36849086,36849087  
5238770  
39737866  
32180470  
110343617  
55062871  
56947979  
100402814  
140160085

57925285  
45978046,45981447  
43296117  
5038242,5047168  
24341072  
2041493  
45807905  
31884043  
131069818,131427223  
57274149  
43185498  
7223662  
99627094,99751599  
67139912,67142112,67142113  
14099081  
220401322  
152746484,152746485  
1590438  
78969375  
74102054  
1474475  
651516  
74723439  
17188322  
68932568  
5154846  
162254655,162947410  
39271537,39271538  
16455051  
4154830  
191150856  
185528075  
65269045  
6658769  
129827032  
25825573  
234663626  
69971133,69979164  
1229850,1229860  
74009153  
3227545  
139715360,140060540  
45565093,45565384

1354210,1362912  
66998856  
134474148  
131245620  
74879862  
159789608  
88619806  
3389435,3918065  
4094774  
140653360,140652571  
5683494  
4028690  
114166775  
150834304,150834312,150834359  
177741111,177808674,177808675,177968358,177968359,177987647  
32603677  
655047  
64790137  
19660981  
78971536  
5427651  
157413204,157455195,157700218,157933157,158109457,158240238,158240243,158240257  
57249091  
2020993,2020994,2141237,2237198,2190451,2190452  
121088884  
156293490  
45543675  
122725870  
25441432,25441935  
100750835  
50105239  
130918981  
372156  
1790861  
1777815,1778321  
128828168  
88793822,88797567  
40314967  
35369244  
43620020  
49146962  
43493133  
51417503,51417534

73982269  
162896152  
103595564  
70604210  
7663229  
98131430  
18236885  
102277204  
83338891  
8789358  
1496555  
748829,872324,1061073  
105622189,105622204,105622207,105622212,105622216,105622218,105622238,10562224:  
2310576,2258323,2267385,2267568,2267637  
197034009  
33096643  
1487836  
146068321  
111144026  
76910759  
75170673,75185899  
105162256  
3823354,3828373  
71797711  
78820926  
25158222  
38849546,38865411,38865415  
64621469  
2214430  
15127614,15258423  
234663626  
239997710,240270095  
11006702  
144449706  
200083183  
1100693  
122471367  
99112078  
3413504,3450637,3493818  
100518917  
38794450,38794465  
11179484  
84872049

11094202  
152276148,152286107  
113705141  
59064635  
71156732  
1320118  
3750867  
23546609  
2522201,2522203  
137337215  
68565904  
127827913  
36120888,36101742,36227031  
32770312,32770392  
7222875  
60004440  
82429891  
65659467  
1887530  
66789157  
49701981  
139101770  
91717962  
76198457  
43017917  
128073095  
75611354  
101915394  
42232916  
14808428  
174850766,174850843  
5998344,5998328,5998366,5998367  
26924516  
14327296  
1264941  
153648928  
131519660,131521885,131549814  
108554540,108715748  
105923990  
17899267  
245328353,245381025  
22385757,22385820  
137288499,137308241

151527035  
150194484,150202102  
140278361  
183363989  
63859606,63859699  
16787669,16787670  
52086350  
43923161  
70425842,70425843  
53665648  
47380657  
223566798  
3660867  
15258423  
141002309  
101106210  
846798  
173103159,173030020  
3423441  
41984584  
1898937  
72350966  
84442915  
129702080  
105815572  
31353414,31353415  
140559639  
77629328  
141569176  
183260073  
195955761  
1219701  
11737881  
15263009  
57552264  
73669043  
84256410  
21035108  
80829706,80895531  
168474308,168479602  
93833054  
16298268,16298269  
11687184,11611732

34466126  
85965696  
77240602  
124799642  
3234979  
131327896  
8421091  
136131436  
31533965  
222873966  
36755667  
6592474  
70397475  
78233344  
45421742  
136340458  
132947536  
3491082  
19916706  
39835886  
99047711  
138586239  
125836294  
39186109,39233975  
115604657  
1382459,1590438,1643950,1476732  
99047711  
5741195  
23505467,23505575,23505616  
43969528  
21770371  
139715786  
70837080  
107459731  
1252535,1252536  
154585884  
168918740,168928224  
47678291  
73635178  
36120888,36101742,36227031  
5802998  
31302287  
19959365



117846079,117846080  
206551978  
83679983  
24507010  
121191208  
234663626  
33729283,34060801  
77084652  
20832165  
112049875,112021706  
1104733  
12924035  
31121792  
19978899  
32647982  
2198844,2226675  
12412836,12412837,12739548  
32046943  
2716530  
71779902  
178701724,178689460  
52317473,52317474  
154302293  
6869494  
12777971  
130608855  
17656840  
92005136  
31128568  
70775172,70815636  
126290561  
878078,889943  
51513353  
145525404  
6062988  
93567990  
16475386  
130989049,130935954  
125448959,125455371  
53534199  
71797711,71692546  
43864935  
1942860

44166374  
26087655  
47546166  
6213311,6213321  
57872957  
129280064  
50894847  
154694024  
19025380  
12188481  
150423967  
133785745,133787347,133789012,133794455  
168839060,169039199  
56155967  
220411703  
11023984  
101649441,101694275,101848789,101858142,101892327  
12602043























6,138277167,138277332,138277338,138285521,138285529









3,105622249,105622272,105622280

| <b>Gene name</b> | <b>number of high covariance sites</b> | <b>chromosome</b> |
|------------------|----------------------------------------|-------------------|
| MARS             | 1                                      | chr12             |
| POLDIP3          | 1                                      | chr22             |
| ADAMTS2          | 1                                      | chr5              |
| GRAMD1A          | 1                                      | chr19             |
| SPTBN4           | 1                                      | chr19             |
| SNRPN            | 1                                      | chr15             |
| TBC1D30          | 1                                      | chr12             |
| TACC2            | 1                                      | chr10             |
| PSME3            | 1                                      | chr17             |
| RPS6KB1          | 1                                      | chr17             |
| PRKAG3           | 1                                      | chr2              |
| ARRB2            | 1                                      | chr17             |
| MAP3K4           | 1                                      | chr6              |
| PRKX             | 1                                      | chrX              |
| BCL2             | 1                                      | chr18             |
| DIP2C            | 2                                      | chr10             |
| GLT1D1           | 1                                      | chr12             |
| UGT1A8           | 3                                      | chr2              |
| STIM1            | 1                                      | chr11             |
| CCT5             | 1                                      | chr5              |
| UBAC1            | 1                                      | chr9              |
| MTRF1L           | 1                                      | chr6              |
| C20orf196        | 1                                      | chr20             |
| KIAA1609         | 1                                      | chr16             |
| CD97             | 1                                      | chr19             |
| PIK3C2B          | 2                                      | chr1              |
| SLC22A18         | 1                                      | chr11             |
| KCNAB2           | 1                                      | chr1              |
| UNC79            | 1                                      | chr14             |
| ABCC5            | 2                                      | chr3              |
| TPST2            | 1                                      | chr22             |
| TAF2             | 1                                      | chr8              |
| MYH7             | 1                                      | chr14             |
| RPS6KA2          | 1                                      | chr6              |
| C14orf159        | 1                                      | chr14             |
| HSPB2-C11orf52   | 1                                      | chr11             |
| RGS12            | 2                                      | chr4              |
| FGF13            | 6                                      | chrX              |
| LRP12            | 1                                      | chr8              |
| UGT1A4           | 3                                      | chr2              |
| RTDR1            | 1                                      | chr22             |
| KRT72            | 1                                      | chr12             |

|              |   |       |
|--------------|---|-------|
| MYO7B        | 1 | chr2  |
| LINC00616    | 2 | chr4  |
| IQCG         | 1 | chr3  |
| STOX2        | 1 | chr4  |
| PRKAR1B      | 1 | chr7  |
| DIS3L2       | 1 | chr2  |
| ZNF213       | 1 | chr16 |
| PI4K2B       | 1 | chr4  |
| LDLRAD3      | 1 | chr11 |
| PRSS21       | 1 | chr16 |
| MIR548F5     | 2 | chr13 |
| RAP1GAP2     | 1 | chr17 |
| FAM178B      | 1 | chr2  |
| BCOR         | 1 | chrX  |
| MACROD2      | 5 | chr20 |
| FLVCR1       | 1 | chr1  |
| OCLN         | 1 | chr5  |
| ALPL         | 1 | chr1  |
| TUB          | 1 | chr11 |
| C1orf159     | 1 | chr1  |
| LOC100507373 | 1 | chr19 |
| STX16-NPEPL1 | 1 | chr20 |
| UGT1A6       | 3 | chr2  |
| BOC          | 1 | chr3  |
| GALK2        | 1 | chr15 |
| RNF26        | 1 | chr11 |
| FGGY         | 1 | chr1  |
| TTL10        | 1 | chr1  |
| ZNF516       | 1 | chr18 |
| PMF1-BGLAP   | 1 | chr1  |
| PRR5         | 1 | chr22 |
| CDK16        | 1 | chrX  |
| MLLT1        | 3 | chr19 |
| GIGYF2       | 1 | chr2  |
| GRAMD4       | 1 | chr22 |
| PEAR1        | 2 | chr1  |
| ST3GAL1      | 1 | chr8  |
| TSHZ1        | 1 | chr18 |
| PKD1L2       | 1 | chr16 |
| KBTBD2       | 1 | chr7  |
| C20orf85     | 2 | chr20 |
| NCAM2        | 1 | chr21 |
| MICAL3       | 1 | chr22 |

|              |   |       |
|--------------|---|-------|
| TLL2         | 1 | chr10 |
| IL12RB1      | 1 | chr19 |
| FBXL17       | 1 | chr5  |
| SERHL2       | 1 | chr22 |
| KAZN         | 1 | chr1  |
| LOC728431    | 1 | chr1  |
| ZDHHC19      | 1 | chr3  |
| B4GALT1      | 2 | chr9  |
| DMD          | 2 | chrX  |
| ASIC2        | 1 | chr17 |
| TPCN2        | 2 | chr11 |
| RPTOR        | 3 | chr17 |
| MYO15B       | 1 | chr17 |
| WDR4         | 2 | chr21 |
| NAALADL2     | 2 | chr3  |
| FAM20C       | 2 | chr7  |
| SNX8         | 2 | chr7  |
| DKK3         | 1 | chr11 |
| RAB36        | 2 | chr22 |
| GAD1         | 1 | chr2  |
| NTN1         | 1 | chr17 |
| AP3D1        | 2 | chr19 |
| AOX1         | 1 | chr2  |
| WDSUB1       | 2 | chr2  |
| ATP11A       | 2 | chr13 |
| HAGHL        | 1 | chr16 |
| MORN1        | 1 | chr1  |
| RAB35        | 1 | chr12 |
| DMD          | 3 | chrX  |
| INTS1        | 1 | chr7  |
| ATP9A        | 1 | chr20 |
| POLR2A       | 1 | chr17 |
| COLEC11      | 3 | chr2  |
| FAM109B      | 1 | chr22 |
| CTBP1-AS1    | 1 | chr4  |
| CANX         | 1 | chr5  |
| SENP5        | 1 | chr3  |
| PPP4R1L      | 1 | chr20 |
| TTC40        | 2 | chr10 |
| KCNQ1        | 2 | chr11 |
| PLXNB3       | 1 | chrX  |
| TMBIM1       | 1 | chr2  |
| LOC100132273 | 2 | chr22 |

|           |   |       |
|-----------|---|-------|
| SELM      | 1 | chr22 |
| RNGTT     | 1 | chr6  |
| CLEC17A   | 2 | chr19 |
| KCND3     | 2 | chr1  |
| DLEU7     | 1 | chr13 |
| UHRF1     | 1 | chr19 |
| C1QL3     | 2 | chr10 |
| LOC653712 | 1 | chr3  |
| SRCAP     | 1 | chr16 |
| HSH2D     | 2 | chr19 |
| WDR5      | 1 | chr9  |
| URGCP     | 1 | chr7  |
| PCDHB8    | 1 | chr5  |
| FADS2     | 1 | chr11 |
| GAS6      | 1 | chr13 |
| BRD1      | 1 | chr22 |
| NR1I2     | 1 | chr3  |
| ABL1      | 1 | chr9  |
| MAGI1     | 1 | chr3  |
| FRMD1     | 1 | chr6  |
| MGMT      | 1 | chr10 |
| SYNGR1    | 1 | chr22 |
| ALX4      | 1 | chr11 |
| HNF4A     | 1 | chr20 |
| RYR1      | 1 | chr19 |
| CMC1      | 1 | chr3  |
| CTNNA3    | 1 | chr10 |
| TSPEAR    | 1 | chr21 |
| CRISPLD2  | 1 | chr16 |
| ABCC1     | 1 | chr16 |
| LIN52     | 1 | chr14 |
| PDZRN3    | 1 | chr3  |
| MRPL28    | 1 | chr16 |
| ULK4      | 2 | chr3  |
| NCOR2     | 1 | chr12 |
| PCDH19    | 2 | chrX  |
| SPTB      | 1 | chr14 |
| SRSF4     | 1 | chr1  |
| MMP25     | 1 | chr16 |
| TMED10    | 2 | chr14 |
| CNPY1     | 1 | chr7  |
| CAMTA1    | 3 | chr1  |
| ABCA13    | 1 | chr7  |

|              |   |       |
|--------------|---|-------|
| DNMT1        | 1 | chr19 |
| PTPRN2       | 6 | chr7  |
| LAMC3        | 1 | chr9  |
| BAZ1A        | 1 | chr14 |
| AGAP1        | 1 | chr2  |
| ARMCX4       | 1 | chrX  |
| LYRM7        | 1 | chr5  |
| PLD5         | 1 | chr1  |
| PDSS1        | 2 | chr10 |
| SH2D4B       | 2 | chr10 |
| CDC42SE2     | 1 | chr5  |
| NUBPL        | 1 | chr14 |
| ERCC8        | 1 | chr5  |
| FIBCD1       | 2 | chr9  |
| NBEA         | 2 | chr13 |
| CNTNAP2      | 1 | chr7  |
| SLC36A1      | 2 | chr5  |
| TNFRSF19     | 1 | chr13 |
| LOC440970    | 1 | chr3  |
| 9-Sep        | 2 | chr17 |
| SIPA1L3      | 2 | chr19 |
| PIGN         | 1 | chr18 |
| CNOT1        | 3 | chr16 |
| RPF2         | 1 | chr6  |
| ZNF282       | 2 | chr7  |
| CDH4         | 2 | chr20 |
| SNX27        | 1 | chr1  |
| DYSF         | 1 | chr2  |
| LARGE        | 2 | chr22 |
| KHDC1        | 1 | chr6  |
| PIK3R4       | 1 | chr3  |
| USP37        | 1 | chr2  |
| PNKD         | 2 | chr2  |
| ATAD3C       | 1 | chr1  |
| C6orf147     | 1 | chr6  |
| WWOX         | 1 | chr16 |
| PCSK6        | 2 | chr15 |
| EIF4G3       | 2 | chr1  |
| TMX2-CTNND1  | 1 | chr11 |
| AHRR         | 2 | chr5  |
| ZMAT4        | 1 | chr8  |
| PLOD1        | 1 | chr1  |
| LOC100133669 | 1 | chr8  |

|            |   |       |
|------------|---|-------|
| MIR548AI   | 1 | chr14 |
| RTN4RL1    | 1 | chr17 |
| NFATC1     | 3 | chr18 |
| RGS10      | 1 | chr10 |
| SLC45A1    | 1 | chr1  |
| DDX12P     | 1 | chr12 |
| COL6A2     | 2 | chr21 |
| FAM83A     | 1 | chr8  |
| ZNF578     | 1 | chr19 |
| LRRC20     | 1 | chr10 |
| FBXL20     | 1 | chr17 |
| DGCR2      | 1 | chr22 |
| CTNND1     | 1 | chr11 |
| CLYBL      | 3 | chr13 |
| ZNF280C    | 1 | chrX  |
| CDK11B     | 1 | chr1  |
| ERICH1-AS1 | 1 | chr8  |
| KDM4B      | 1 | chr19 |
| MRTO4      | 1 | chr1  |
| LAMA5      | 3 | chr20 |
| KANK1      | 1 | chr9  |
| NLRP2      | 2 | chr19 |
| NAGPA      | 1 | chr16 |
| DET1       | 1 | chr15 |
| COTL1      | 2 | chr16 |
| MAFK       | 1 | chr7  |
| DSCAML1    | 2 | chr11 |
| EFHA1      | 1 | chr13 |
| CPN2       | 1 | chr3  |
| SLC7A9     | 1 | chr19 |
| GABRD      | 1 | chr1  |
| CRELD2     | 1 | chr22 |
| MGAT4C     | 1 | chr12 |
| CTSD       | 2 | chr11 |
| ADCY3      | 1 | chr2  |
| YEATS2     | 1 | chr3  |
| 9-Sep      | 1 | chr17 |
| CUL1       | 1 | chr7  |
| DRAM1      | 1 | chr12 |
| BAIAP2     | 2 | chr17 |
| ROR2       | 1 | chr9  |
| SYT2       | 2 | chr1  |
| KDM4C      | 1 | chr9  |

|           |   |       |
|-----------|---|-------|
| TGS1      | 1 | chr8  |
| LDLRAD4   | 1 | chr18 |
| GCH1      | 1 | chr14 |
| C7orf10   | 1 | chr7  |
| WBSCR17   | 1 | chr7  |
| TBCD      | 1 | chr17 |
| FAM189A2  | 1 | chr9  |
| MYRF      | 2 | chr11 |
| TMEM184A  | 2 | chr7  |
| GPC1      | 1 | chr2  |
| ZBTB11    | 1 | chr3  |
| HELZ2     | 1 | chr20 |
| C1orf94   | 2 | chr1  |
| LINC00478 | 1 | chr21 |
| ATP8B4    | 2 | chr15 |
| GRM3      | 1 | chr7  |
| RTL1      | 1 | chr14 |
| XKR6      | 1 | chr8  |
| BCYRN1    | 1 | chrX  |
| DAG1      | 1 | chr3  |
| KIAA1217  | 1 | chr10 |
| PQLC1     | 2 | chr18 |
| ZFP82     | 1 | chr19 |
| P2RX4     | 1 | chr12 |
| JRK       | 1 | chr8  |
| CSMD1     | 2 | chr8  |
| DTNB      | 1 | chr2  |
| FOXP1     | 1 | chr3  |
| ZNF517    | 1 | chr8  |
| CYFIP1    | 1 | chr15 |
| FAM187B   | 1 | chr19 |
| LHX6      | 1 | chr9  |
| UGT1A10   | 3 | chr2  |
| TAF1C     | 2 | chr16 |
| MSRA      | 1 | chr8  |
| AQP1      | 1 | chr7  |
| ARHGAP8   | 1 | chr22 |
| PTPRS     | 2 | chr19 |
| AKAP13    | 1 | chr15 |
| ZNF284    | 1 | chr19 |
| MED29     | 1 | chr19 |
| LINC00523 | 1 | chr14 |
| R3HDM4    | 1 | chr19 |



|          |   |       |
|----------|---|-------|
| TRDN     | 1 | chr6  |
| TAF4     | 1 | chr20 |
| ART3     | 1 | chr4  |
| CPNE7    | 1 | chr16 |
| SBNO2    | 2 | chr19 |
| SHD      | 1 | chr19 |
| MAGIX    | 4 | chrX  |
| VPS26A   | 2 | chr10 |
| TMEM8A   | 1 | chr16 |
| JOSD2    | 1 | chr19 |
| ABCC4    | 1 | chr13 |
| MMP17    | 1 | chr12 |
| DNAH17   | 1 | chr17 |
| PCDH9    | 2 | chr13 |
| ACTRT2   | 1 | chr1  |
| NRF1     | 1 | chr7  |
| RBMS3    | 1 | chr3  |
| MCF2L    | 1 | chr13 |
| BTBD2    | 1 | chr19 |
| NSMCE1   | 1 | chr16 |
| DKK4     | 1 | chr8  |
| FAT3     | 1 | chr11 |
| FAR1     | 1 | chr11 |
| TCF7L1   | 1 | chr2  |
| MACROD2  | 2 | chr20 |
| MAP3K12  | 1 | chr12 |
| NUDCD1   | 1 | chr8  |
| GTF2A1L  | 1 | chr2  |
| ZNF890P  | 1 | chr7  |
| CCDC102B | 1 | chr18 |
| OBSCN    | 1 | chr1  |
| ZNF565   | 1 | chr19 |
| COL25A1  | 1 | chr4  |
| EHMT1    | 1 | chr9  |
| C2orf83  | 2 | chr2  |
| TFDP2    | 1 | chr3  |
| LRRC4C   | 1 | chr11 |
| LRRC15   | 1 | chr3  |
| CCDC88C  | 1 | chr14 |
| PCSK6    | 4 | chr15 |
| VDR      | 2 | chr12 |
| CTBP2    | 3 | chr10 |
| GFOD1    | 1 | chr6  |

|                |   |       |
|----------------|---|-------|
| GLB1           | 1 | chr3  |
| RADIL          | 1 | chr7  |
| DNAJB13        | 2 | chr11 |
| STON1-GTF2A1L  | 1 | chr2  |
| LINC00673      | 1 | chr17 |
| IFNAR1         | 1 | chr21 |
| SNX14          | 1 | chr6  |
| PTPRM          | 1 | chr18 |
| CCDC113        | 1 | chr16 |
| MLL3           | 1 | chr7  |
| C1QTNF6        | 1 | chr22 |
| ANKRD24        | 1 | chr19 |
| RIN1           | 1 | chr11 |
| TCEAL2         | 1 | chrX  |
| PMF1           | 1 | chr1  |
| GOLGB1         | 1 | chr3  |
| SLITRK4        | 1 | chrX  |
| LRP1B          | 1 | chr2  |
| PTER           | 1 | chr10 |
| LOC100286922   | 2 | chr2  |
| ANKFY1         | 1 | chr17 |
| DOK6           | 2 | chr18 |
| C15orf38-AP3S2 | 1 | chr15 |
| VIPR2          | 1 | chr7  |
| ENPP7          | 1 | chr17 |
| ABLIM2         | 1 | chr4  |
| CHD4           | 1 | chr12 |
| CLPSL1         | 1 | chr6  |
| DAGLA          | 5 | chr11 |
| GAS7           | 1 | chr17 |
| CDH12          | 1 | chr5  |
| HMHA1          | 1 | chr19 |
| ABCB5          | 1 | chr7  |
| ATG4B          | 1 | chr2  |
| ESR1           | 1 | chr6  |
| NOTCH1         | 1 | chr9  |
| FOXK2          | 2 | chr17 |
| NEBL           | 1 | chr10 |
| LAMA4          | 1 | chr6  |
| FAM69C         | 1 | chr18 |
| STK40          | 2 | chr1  |
| SVIL           | 1 | chr10 |
| SNX29          | 1 | chr16 |

|           |   |       |
|-----------|---|-------|
| LINC00840 | 1 | chr10 |
| POC1B     | 1 | chr12 |
| STK11     | 1 | chr19 |
| ZNF7      | 1 | chr8  |
| CNOT1     | 2 | chr16 |
| GPR98     | 1 | chr5  |
| B3GALT6   | 1 | chr1  |
| ACYP1     | 1 | chr14 |
| BTBD16    | 1 | chr10 |
| MUC17     | 1 | chr7  |
| MLF1      | 1 | chr3  |
| MRC2      | 1 | chr17 |
| GTF3C1    | 1 | chr16 |
| LRRTM4    | 1 | chr2  |
| UBE2H     | 1 | chr7  |
| COL5A3    | 1 | chr19 |
| CHFR      | 1 | chr12 |
| ABCA2     | 1 | chr9  |
| ADNP2     | 1 | chr18 |
| IFT140    | 1 | chr16 |
| GPC5      | 1 | chr13 |
| SUV420H2  | 1 | chr19 |
| IL1RAP    | 2 | chr3  |
| KIRREL3   | 1 | chr11 |
| PDE9A     | 1 | chr21 |
| JAG2      | 5 | chr14 |
| RER1      | 1 | chr1  |
| MIR548AN  | 1 | chr13 |
| AP3S2     | 1 | chr15 |
| SULF2     | 1 | chr20 |
| BPTF      | 1 | chr17 |
| COL14A1   | 1 | chr8  |
| PRKCZ     | 3 | chr1  |
| PVRL1     | 1 | chr11 |
| IQSEC1    | 1 | chr3  |
| GATA4     | 1 | chr8  |
| CEP112    | 2 | chr17 |
| GEMIN7    | 1 | chr19 |
| KCNQ2     | 2 | chr20 |
| NRCAM     | 1 | chr7  |
| POR       | 2 | chr7  |
| PCNXL2    | 1 | chr1  |
| PCSK2     | 1 | chr20 |

|           |   |       |
|-----------|---|-------|
| VGLL4     | 1 | chr3  |
| SLC2A5    | 1 | chr1  |
| PDE12     | 1 | chr3  |
| IFNL4     | 1 | chr19 |
| NT5C3     | 1 | chr7  |
| MEGF6     | 1 | chr1  |
| LOC653160 | 1 | chr1  |
| EMC1      | 1 | chr1  |
| RHOH      | 1 | chr4  |
| SKI       | 1 | chr1  |
| CHST8     | 1 | chr19 |
| EML1      | 1 | chr14 |
| WDR90     | 1 | chr16 |
| DCTN2     | 1 | chr12 |
| MIPEP     | 1 | chr13 |
| STK3      | 1 | chr8  |
| SHANK2    | 3 | chr11 |
| TXN2      | 1 | chr22 |
| ASAP1     | 2 | chr8  |
| RALYL     | 1 | chr8  |
| GALNTL6   | 2 | chr4  |
| PKP4      | 3 | chr2  |
| SPON1     | 1 | chr11 |
| UGT1A9    | 3 | chr2  |
| HAUS7     | 2 | chrX  |
| SMOC1     | 1 | chr14 |
| TBC1D22A  | 1 | chr22 |
| PGS1      | 2 | chr17 |
| RAB40C    | 1 | chr16 |
| USP8      | 1 | chr15 |
| CAMK1D    | 1 | chr10 |
| LYRM4     | 1 | chr6  |
| CTBP1     | 3 | chr4  |
| RAB5B     | 1 | chr12 |
| AP1M1     | 1 | chr19 |
| KCNK17    | 2 | chr6  |
| MAGEA4    | 1 | chrX  |
| WDR19     | 1 | chr4  |
| DDX1      | 1 | chr2  |
| HIBCH     | 1 | chr2  |
| PARVB     | 1 | chr22 |
| SLC7A5    | 1 | chr16 |
| EPHA1-AS1 | 1 | chr7  |

|                |   |       |
|----------------|---|-------|
| CUX1           | 5 | chr7  |
| ARHGAP19-SLIT1 | 2 | chr10 |
| UGT1A3         | 2 | chr2  |
| NPY            | 1 | chr7  |
| ANO1           | 2 | chr11 |
| C6orf123       | 1 | chr6  |
| MYH7B          | 1 | chr20 |
| ENPP6          | 1 | chr4  |
| MYO9B          | 1 | chr19 |
| ZNF483         | 2 | chr9  |
| MRPL45P2       | 2 | chr17 |
| SMAD6          | 1 | chr15 |
| ANKRD13C       | 1 | chr1  |
| EPB41L2        | 1 | chr6  |
| PLEKHG4B       | 1 | chr5  |
| RPL23AP53      | 6 | chr8  |
| C1QTNF2        | 1 | chr5  |
| GRM5           | 1 | chr11 |
| SH3BP2         | 1 | chr4  |
| TSPAN9         | 3 | chr12 |
| MAP2K2         | 1 | chr19 |
| KIF1A          | 1 | chr2  |
| CLCN7          | 1 | chr16 |
| ATXN1          | 1 | chr6  |
| KIAA1432       | 1 | chr9  |
| TMCO3          | 1 | chr13 |
| GNAZ           | 1 | chr22 |
| DOT1L          | 2 | chr19 |
| INPP5A         | 2 | chr10 |
| FAM19A5        | 1 | chr22 |
| EIF4A3         | 1 | chr17 |
| TMPRSS15       | 1 | chr21 |
| CHMP6          | 1 | chr17 |
| AP3M1          | 3 | chr10 |
| DIAPH2         | 2 | chrX  |
| COL23A1        | 5 | chr5  |
| UGT1A5         | 3 | chr2  |
| AP2A2          | 1 | chr11 |
| CABP1          | 1 | chr12 |
| ARHGEF9        | 1 | chrX  |
| CCT3           | 1 | chr1  |
| PARK2          | 2 | chr6  |
| PRR5-ARHGAP8   | 2 | chr22 |

|             |    |       |
|-------------|----|-------|
| DIAPH2      | 1  | chrX  |
| RYR3        | 3  | chr15 |
| ZFP42       | 2  | chr4  |
| SFRP1       | 1  | chr8  |
| MKLN1       | 1  | chr7  |
| B4GALNT4    | 1  | chr11 |
| ARHGEF10    | 1  | chr8  |
| AGPS        | 1  | chr2  |
| ERC1        | 1  | chr12 |
| MOB2        | 2  | chr11 |
| PIEZO1      | 2  | chr16 |
| EIF2AK4     | 1  | chr15 |
| DLGAP3      | 1  | chr1  |
| SERPINH1    | 1  | chr11 |
| SLC29A4     | 1  | chr7  |
| GTF2IRD1    | 1  | chr7  |
| EED         | 1  | chr11 |
| FLJ12825    | 1  | chr12 |
| CELSR1      | 2  | chr22 |
| CTBP2       | 1  | chr10 |
| FZR1        | 3  | chr19 |
| TNFAIP2     | 1  | chr14 |
| CAMSAP3     | 1  | chr19 |
| BEND2       | 1  | chrX  |
| ITGBL1      | 1  | chr13 |
| DLEU7-AS1   | 1  | chr13 |
| TSNARE1     | 1  | chr8  |
| FGF2        | 1  | chr4  |
| FPGT-TNNI3K | 1  | chr1  |
| ASCL3       | 1  | chr11 |
| FLG         | 2  | chr1  |
| LINC00200   | 1  | chr10 |
| GAK         | 1  | chr4  |
| FAM189A1    | 1  | chr15 |
| SEPSECS     | 1  | chr4  |
| LPHN1       | 1  | chr19 |
| NDP         | 1  | chrX  |
| ANTXR2      | 12 | chr4  |
| EHD1        | 1  | chr11 |
| SEC14L1     | 1  | chr17 |
| CBFA2T3     | 3  | chr16 |
| GSK3B       | 1  | chr3  |
| TNNI3K      | 1  | chr1  |

|                |   |       |
|----------------|---|-------|
| FAM129C        | 1 | chr19 |
| TYW1           | 1 | chr7  |
| TIAM1          | 1 | chr21 |
| PIGU           | 1 | chr20 |
| TNRC18         | 1 | chr7  |
| RHPN1-AS1      | 1 | chr8  |
| C7orf50        | 1 | chr7  |
| UHRF1BP1L      | 1 | chr12 |
| YIF1B          | 2 | chr19 |
| PCSK4          | 1 | chr19 |
| ZNF99          | 1 | chr19 |
| VAV2           | 1 | chr9  |
| NINL           | 1 | chr20 |
| AASDH          | 1 | chr4  |
| ZNF664-FAM101A | 2 | chr12 |
| TRPM7          | 2 | chr15 |
| SEC14L5        | 3 | chr16 |
| IL32           | 1 | chr16 |
| AES            | 1 | chr19 |
| NPEPL1         | 1 | chr20 |
| ZIC1           | 1 | chr3  |
| IGF1R          | 1 | chr15 |
| NOV            | 1 | chr8  |
| NPR3           | 2 | chr5  |
| FHIT           | 1 | chr3  |
| HADHA          | 1 | chr2  |
| DGKE           | 1 | chr17 |
| CTPS2          | 1 | chrX  |
| BSN            | 1 | chr3  |
| AFMID          | 1 | chr17 |
| FAM227A        | 1 | chr22 |
| C10orf68       | 1 | chr10 |
| PODN           | 1 | chr1  |
| TRAPPC8        | 1 | chr18 |
| FRRS1L         | 1 | chr9  |
| IDO2           | 1 | chr8  |
| RIPK4          | 1 | chr21 |
| TBC1D8         | 1 | chr2  |
| ITPR2          | 1 | chr12 |
| TAZ            | 1 | chrX  |
| ARHGAP23       | 1 | chr17 |
| RAB20          | 1 | chr13 |
| GNG7           | 1 | chr19 |

|              |   |       |
|--------------|---|-------|
| GPR133       | 3 | chr12 |
| SORCS1       | 2 | chr10 |
| TGFBRAP1     | 1 | chr2  |
| FCHO1        | 1 | chr19 |
| SLC37A1      | 1 | chr21 |
| ZIC3         | 1 | chrX  |
| KAT2B        | 1 | chr3  |
| PAR6B        | 1 | chr20 |
| TUFT1        | 1 | chr1  |
| ANP32E       | 2 | chr1  |
| PDE1A        | 1 | chr2  |
| URGCP-MRPS24 | 1 | chr7  |
| ESPL1        | 1 | chr12 |
| TNPO3        | 1 | chr7  |
| CACNA1B      | 1 | chr9  |
| PCCA         | 1 | chr13 |
| NXN          | 1 | chr17 |
| PRDM16       | 1 | chr1  |
| FTSJ1        | 2 | chrX  |
| KIAA1211     | 1 | chr4  |
| KIAA1751     | 1 | chr1  |
| KIF19        | 1 | chr17 |
| RBFOX1       | 2 | chr16 |
| COL17A1      | 1 | chr10 |
| CHMP5        | 1 | chr9  |
| CORO2B       | 1 | chr15 |
| DLGAP2       | 2 | chr8  |
| KLHL6        | 1 | chr3  |
| SLC51A       | 1 | chr3  |
| TPT1-AS1     | 1 | chr13 |
| MAD2L2       | 1 | chr1  |
| PPFIA3       | 1 | chr19 |
| HTRA3        | 1 | chr4  |
| FAM19A4      | 1 | chr3  |
| KIF17        | 1 | chr1  |
| CACNA1G      | 1 | chr17 |
| WDR24        | 1 | chr16 |
| FRMD1        | 2 | chr6  |
| HEPHL1       | 1 | chr11 |
| ADAMTS17     | 1 | chr15 |
| HDAC4        | 1 | chr2  |
| PCSK6        | 3 | chr15 |
| PACSIN1      | 1 | chr6  |



|           |   |       |
|-----------|---|-------|
| FLI1      | 2 | chr11 |
| FAM101A   | 1 | chr12 |
| ANO2      | 3 | chr12 |
| HTT       | 1 | chr4  |
| ACSL6     | 1 | chr5  |
| TMF1      | 1 | chr3  |
| SGSM1     | 1 | chr22 |
| PLA2G3    | 1 | chr22 |
| BCL11B    | 1 | chr14 |
| FAM53A    | 3 | chr4  |
| ADARB2    | 1 | chr10 |
| LOC441666 | 8 | chr10 |
| HPS5      | 1 | chr11 |
| UGT1A7    | 3 | chr2  |
| APOC1     | 1 | chr19 |
| SLC2A6    | 1 | chr9  |
| TSPAN11   | 1 | chr12 |
| QRICH2    | 1 | chr17 |
| ATP9B     | 1 | chr18 |
| TSPAN2    | 1 | chr1  |
| CLPTM1    | 1 | chr19 |
| OCA2      | 1 | chr15 |
| PTCHD2    | 2 | chr1  |
| CUL3      | 1 | chr2  |
| SLC12A5   | 1 | chr20 |
| CXCR3     | 1 | chrX  |
| ST6GAL2   | 1 | chr2  |
| YWHAE     | 2 | chr17 |
| SYNPR     | 2 | chr3  |
| SMOC2     | 2 | chr6  |
| SH3PXD2A  | 2 | chr10 |
| LOC339166 | 1 | chr17 |
| TMEM240   | 1 | chr1  |
| LOC286059 | 1 | chr8  |
| MAML2     | 1 | chr11 |
| TNC       | 2 | chr9  |
| NRP2      | 1 | chr2  |
| ABO       | 1 | chr9  |
| ASF1B     | 1 | chr19 |
| GBF1      | 1 | chr10 |
| ENGASE    | 1 | chr17 |
| RYR2      | 1 | chr1  |
| CHD1      | 1 | chr5  |

|           |   |       |
|-----------|---|-------|
| ARHGAP19  | 2 | chr10 |
| CACNA1H   | 2 | chr16 |
| FANCC     | 2 | chr9  |
| TJP2      | 1 | chr9  |
| EYA2      | 1 | chr20 |
| CYP11B1   | 1 | chr8  |
| OPRD1     | 1 | chr1  |
| MND1      | 1 | chr4  |
| RBFOX1    | 1 | chr16 |
| CPPED1    | 1 | chr16 |
| SAMD3     | 1 | chr6  |
| LONRF3    | 1 | chrX  |
| HSF1      | 1 | chr8  |
| FERMT1    | 1 | chr20 |
| ZSCAN1    | 2 | chr19 |
| IL6R      | 1 | chr1  |
| DHX37     | 2 | chr12 |
| CBFA2T3   | 2 | chr16 |
| MYO15A    | 1 | chr17 |
| CACNA1D   | 1 | chr3  |
| N4BP3     | 2 | chr5  |
| EPHA2     | 1 | chr1  |
| DYSF      | 2 | chr2  |
| ADAMTS20  | 1 | chr12 |
| LOC286467 | 4 | chrX  |
| PLAUR     | 1 | chr19 |
| KIF26B    | 4 | chr1  |
| PLEKHG1   | 3 | chr6  |
| TNFRSF8   | 1 | chr1  |
| PXDNL     | 1 | chr8  |
| RPRD2     | 4 | chr1  |
| ACSM1     | 1 | chr16 |
| ALDH1L1   | 1 | chr3  |
| RASA3     | 1 | chr13 |
| UGGT2     | 1 | chr13 |

**site locations**

57889227  
42990074  
178701724  
35502532  
41050290  
25196084  
65269045  
123817855  
40992887  
57986974  
219691758  
4622638  
161500455  
3621933  
60816889  
367482,444996  
129417210  
234633332,234663626,234663653  
3982840  
10253162  
138831135  
153311755  
5741195  
84514963  
14506631  
204417023,204436065  
2937629  
6143145  
93805879  
183713815,183713816  
26971735  
120798926  
23896981  
167182470  
91609462  
111784923  
3423441,3374161  
138136408,138136474,138277128,138277131,138277156,138277167  
105540724  
234633332,234663626,234663653  
23441116  
52995043

128367090  
138973585,138974330  
197665044  
184848069  
752449  
232933589  
3192535  
25248474  
36135842  
2871451  
36101742,36227031  
2824332  
97543776  
39933047  
14423492,14423493,14759025,15966163,15984559  
213048256  
68831858  
21892980  
8088757  
1023891  
14260075  
57274149  
234633332,234663626,234663653  
112991312  
49458652  
119206373  
59938978  
1109849  
74097118  
156189625  
45113150  
47086345  
6213284,6213311,6213321  
233566677  
47074257  
156878421,156883491  
134494941  
72949954  
81166557  
32909180  
56732799,56733571  
22385757  
18398207

98132016  
18183527  
107417280  
42969129  
15127614  
37923004  
195925355  
33132490,33132491  
31912609,32094716  
31372187  
68821860,68853503  
78597523,78683458,78847067  
73595712  
44280703,44290375  
175269482,174850766  
214822,226491  
2291790,2293508  
11988839  
23505467,23505575  
171675123  
8993970  
2131565,2131578  
201475722  
160102724,160102738  
113362104,113398928  
779687  
2310576  
120538685  
31912609,32094716,32603677  
1532399  
50288630  
7405073  
3644890,3645428,3648757  
42473603  
1244109  
179145862  
196634119  
56845938  
134681693,134727535  
2495420,2798848  
153033730  
219146078  
42492062,42492104

31503149  
89498970  
14712665,14712697  
112525024,112525031  
51417534  
4945917  
16561923,16561939  
128587817  
30747191  
16269140,16269141  
137005022  
43923161  
140559639  
61609749  
114555024  
50191970  
119533732  
133593565  
65412778  
168474308  
131316315  
39754031  
44330555  
43044775  
39071020  
28296877  
67854284  
45941327  
84872049  
16161030  
74646222  
73669147  
419921  
41962818,41882537  
124826676  
99662864,99662866  
65220461  
29485475  
3101637  
75621019,75639854  
155323907  
7633798,7639870,7742833  
48244355

10247268  
157606110,157793222,157799746,158109457,158240238,158240257  
133906248  
35332660  
236613477  
100713754  
130529475  
242252838  
27015760,27015761  
82360631,82360632  
130638028  
32180470  
60192106  
133787347,133789012  
36101742,36227031  
146050135  
150834304,150834312  
24155527  
84695352  
75348109,75372848  
38554304,38697053  
59803822  
58560322,58610256,58610257  
111342297  
148904623,148904794  
60450242,60452249  
151615685  
71797711  
33911677,34060801  
74009153  
130434201  
219328681  
219186591,219146078  
1387347  
74009153  
78357293  
101924537,101924539  
21134595,21134596  
57552264  
355048,435782  
40518778  
12015766  
144081249

29968344  
1841741  
77202644,77202645,77220878  
121301386  
8392394  
9588490  
47546079,47546166  
124219472  
52985695  
72083976  
37552988  
19025380  
57552264  
100545379,100260559,100260560  
129385813  
1576635  
872324  
5095792  
19583733  
60926221,60930091,60938308  
655106  
55494187,55495378  
5075224  
89067474  
84608934,84615224  
1574811  
117544836,117566161  
22069818  
194063152  
33354403  
1956361  
50318505  
86995791  
1777815,1778321  
25064191  
183493990  
75372848  
148480233  
102277334  
79042974,79063592  
94516767  
202638788,202638789  
7147974



56736652  
13571929  
55363590  
40287102  
70886007  
80829706  
71951803  
61547236,61547237  
1587041,1587042  
241387018  
101393295  
62199258  
34642382,34642490  
17725744  
50239403,50239404  
86457243  
101349763  
10798255  
70837080  
49517215  
24832885  
77674633,77683125  
36893856  
121661688  
143747271  
3828373,4256138  
25638407  
71290557  
146030084  
22896102  
35718191  
124987769  
234633332,234663626,234663653  
84212709,84212710  
10280165  
30955122  
45187308  
5238770,5263766  
86184442  
44585591  
39883987  
101138965  
897518

123681139  
60598912  
76990688  
89656043  
1148048,1164139  
4287197  
49022855,49022886,49022891,49022902  
70910031,70910888  
427782  
51012814  
95741647  
132329206  
76565604  
67197164,67197166  
2938265  
129265545  
29503557  
113705141  
2000129  
27244129  
42232916  
92622010  
13695712  
85517291  
15966163,15984559  
53885310  
110343617  
48844977  
5175313  
66602320  
228472980  
36680376  
109933638  
140653360  
228491298,228491315  
141846292  
40459032  
194077617  
91775504  
101903335,101915394,101924537,101924539  
48257325,48257326  
126715435,126719831,126719832  
13430489

33128890  
4857396  
73669043,73681089  
48844977  
70526843  
34711337  
86280873  
8219261  
58300770  
151998404  
37578578  
4190586  
66099987  
101380931  
156189625  
121407725  
142721761  
142022616  
16504929  
234663626,234663653  
4165347  
67361019,67361031  
90425672  
158896515  
77708969  
8019279  
6715084  
35753205  
61490244,61511261,61456424,61458594,61494325  
9820694  
22116020  
1071946  
20749914  
242610500  
152077845  
139424016  
80491066,80508538  
21183608  
112505108  
72110160  
36807480,36810010  
29780291  
12174662

44373190  
89897387  
1219701  
146068321  
58610256,58610257  
89896790  
1168540  
75528578  
124089034  
100684925  
158319418  
60728953  
27491291  
77379705  
129534618  
10102490  
133420273  
139904754  
77879657  
1641550  
92577340  
55856850  
190352746,190352783  
126453648  
44152788  
105622204,105622207,105622243,105622249,105622272  
2334259  
100043086  
90425672  
46344569  
65867128  
121164388  
2040776,2041154,2048727  
119574608  
12946689  
11566772  
63904583,63859606  
45587004  
62049177,62056325  
107811682  
75611354,75614294  
233399444  
17411845

11611732  
9126976  
57544713  
39737866  
33096643  
3450637  
35442519  
19573205  
40238931  
2214430  
34188708  
100402814  
711711  
57925285  
24341072  
99751599  
70425842,70425843,70437604  
36869013  
131069818,131427223  
85812638  
173103159,173030020  
159519410,159519451,159519478  
14099081  
234633332,234663626,234663653  
152746484,152746485  
70397475  
47508572  
76400505,76400506  
651516  
50752566  
12412836  
5154846  
1222301,1224540,1224647  
56385579  
16339715  
39271537,39271538  
151087988  
39233975  
15756328  
191150856  
44515804  
87871580  
143111464

101694275,101848789,101858142,101892327,101842576  
99047710,99047711  
234663626,234663653  
24324808  
69971133,69979164  
168185593  
33583715  
185037323  
17188322  
114294417,114294418  
45565093,45565384  
66998856  
70815636  
131245620  
163768  
179588,179616,179623,179642,179644,179653  
159789608  
88619806  
2829476  
3227502,3277484,3386339  
4094774  
241674447  
1497136  
16692260  
5683494  
114166775  
23441116  
2198844,2226675  
134372679,134372680  
49057291  
78114653  
19660981  
78971536  
75880423,75893632,75893633  
96508663,96798784  
177741111,177808674,177808675,177968358,177968359  
234633332,234663626,234663653  
1001560  
121088884  
63005076  
156293490  
162850908,162254655  
45113150,45187308

96508663  
33609541,33652116,33993318  
188918159,188918166  
41122515  
130918981  
372156  
1790861  
178331204  
1421739  
1777815,1778321  
88793822,88797567  
40314967  
35369244  
75279846  
5338900  
73982269  
85964886  
54500162  
46908054,46839894  
126715435  
3526496,3526784,3533273  
103595564  
7663229  
18236885  
102277204  
51417534  
143313650  
123787320  
74712951  
8959545  
152276148,152286107  
1206496  
878078  
29499634  
25158222  
14260075  
43829064  
80885897,80885901,80885910,80885924,80885930,80885933,80885952,80885978,8088598  
64621469  
75170673  
89038729,88953882,88991154  
119689587  
74712951

17656840  
66479905  
32831129  
33212945  
5427651  
144449706  
1100693  
100518917  
38794450,38794465  
1485478  
22943371  
136778878  
25441432  
57249091  
124799642,124545513  
50935282,50935283  
5029979,5038242,5047168  
3117519  
3053682  
57274149  
147128594  
99504127  
120433500  
32770312,32770392  
60004440  
26440941  
54933103  
16727277  
49701981  
76198457  
39013521  
33161834  
53537264  
29457371  
111926896  
39835886  
43165015  
101654460  
26924516  
153648928  
36590622  
111207612  
2601809



131519660,131521885,131549814  
108554540,108715748  
105923990  
17899267  
43946639  
136648374  
20111266  
49365211  
151527035  
150194484,150202102  
183363989  
43923161  
53665648  
128671100  
141002309  
101106210  
846798  
3228639  
48339984,48339985  
57080660  
1898937  
72350966  
6384299,6869494  
105815572  
33269800  
69011119  
1496555,1493528  
183260073  
195955761  
45919499  
11737881  
49629845  
8278123  
68931611  
21035108  
48689799  
737791  
168474308,168479602  
93833054  
100667714  
239997710  
101915394,101924537,101924539  
34466126

128611281,128611282  
124799642  
5998344,5998328,5998366  
3234979  
131327896  
69089846  
25228296  
31533965  
99679700  
1645478,1649416,1663210  
1643950  
42837883,42837904,42854040,42854072,42854116,42863173,42863209,42863215  
18338734  
234633332,234663626,234663653  
45421742  
136340458  
31133655  
74294757  
76910759  
115604657  
45490426  
28256783  
11591735,11591802  
225394812  
44686590  
70837080  
107459731  
1252535,1252536  
63269640,63269641  
168918740,168928224  
105584366,105480533  
5802998  
1475095  
22927142  
95965927  
117846079,117846080  
206551978  
136131436  
14231242  
104089420  
77084652  
237382689  
98259396

99047710,99047711  
1211221,1235322  
97979532,97979533  
71779902  
45543675  
143957579  
29190137  
154302293  
6869494  
12777971  
130608855  
118143818  
145525404  
6062988  
58552731,58545712  
154416933  
125448959,125455371  
88953882,88991154  
18054691  
53534199  
177546160,177548237  
16455051  
71797711,71692546  
43864935  
130863889,130863893,130863905,130863933  
44166374  
245381025,245393901,245681000,245715801  
151083585,151085415,151102302  
12188481  
52317474  
150375271,150410977,150423966,150423967  
20641660  
125834605  
114880846  
96580857



























!0,80885982,80885995,80885996



| <b>Gene name</b> | <b>number of high covariance sites</b> | <b>chromosome</b> |
|------------------|----------------------------------------|-------------------|
| LOC100289019     | 1                                      | chr9              |
| PRKX             | 1                                      | chrX              |
| CCDC40           | 1                                      | chr17             |
| BCL2L14          | 1                                      | chr12             |
| PTPRN2           | 3                                      | chr7              |
| TPPP             | 2                                      | chr5              |
| ARRB2            | 1                                      | chr17             |
| KCNJ12           | 1                                      | chr17             |
| BIN3             | 1                                      | chr8              |
| SORCS3           | 1                                      | chr10             |
| WDR31            | 2                                      | chr9              |
| TBC1D8           | 2                                      | chr2              |
| CRLF1            | 1                                      | chr19             |
| UBAC1            | 1                                      | chr9              |
| RGS22            | 9                                      | chr8              |
| LDB2             | 1                                      | chr4              |
| OSBPL5           | 1                                      | chr11             |
| TNS1             | 1                                      | chr2              |
| MRPL28           | 2                                      | chr16             |
| CARD11           | 2                                      | chr7              |
| PRKCA            | 1                                      | chr17             |
| LCP1             | 1                                      | chr13             |
| EEF1E1-MUTED     | 1                                      | chr6              |
| IGSF11           | 1                                      | chr3              |
| ITPR3            | 1                                      | chr6              |
| DPP6             | 1                                      | chr7              |
| TRPV3            | 1                                      | chr17             |
| DRAM1            | 1                                      | chr12             |
| DZANK1           | 1                                      | chr20             |
| MYRF             | 2                                      | chr11             |
| RPS6KB1          | 1                                      | chr17             |
| MAB21L1          | 2                                      | chr13             |
| DNMT3A           | 1                                      | chr2              |
| PARD3            | 1                                      | chr10             |
| KIF26B           | 1                                      | chr1              |
| PI4K2B           | 1                                      | chr4              |
| ELOVL6           | 1                                      | chr4              |
| BSND             | 1                                      | chr1              |
| BCOR             | 1                                      | chrX              |
| TUB              | 1                                      | chr11             |
| CSMD1            | 3                                      | chr8              |
| NCOR2            | 2                                      | chr12             |

|          |   |       |
|----------|---|-------|
| UGT1A6   | 1 | chr2  |
| TBC1D16  | 1 | chr17 |
| RNF26    | 1 | chr11 |
| FGGY     | 1 | chr1  |
| RPS6KA1  | 1 | chr1  |
| CCM2     | 1 | chr7  |
| PPIL6    | 1 | chr6  |
| NFATC1   | 3 | chr18 |
| SCAMP4   | 1 | chr19 |
| NTSR1    | 1 | chr20 |
| MYH10    | 1 | chr17 |
| LHX3     | 1 | chr9  |
| IL12RB1  | 1 | chr19 |
| FAM19A5  | 2 | chr22 |
| SHANK2   | 1 | chr11 |
| PHF21B   | 1 | chr22 |
| SERPINF2 | 1 | chr17 |
| IQSEC1   | 1 | chr3  |
| RRP7A    | 1 | chr22 |
| ZNF236   | 1 | chr18 |
| DKK3     | 1 | chr11 |
| TBL1XR1  | 1 | chr3  |
| PDE6C    | 1 | chr10 |
| FUT3     | 1 | chr19 |
| FILIP1   | 1 | chr6  |
| PGP      | 1 | chr16 |
| DDX3X    | 1 | chrX  |
| MROH1    | 1 | chr8  |
| MSRA     | 1 | chr8  |
| ZNF708   | 1 | chr19 |
| KCNQ2    | 1 | chr20 |
| PACRG    | 1 | chr6  |
| KIRREL   | 1 | chr1  |
| BMF      | 1 | chr15 |
| DEAF1    | 1 | chr11 |
| KCNAB2   | 1 | chr1  |
| GABRD    | 1 | chr1  |
| UGT1A5   | 1 | chr2  |
| ATP9A    | 1 | chr20 |
| FAM53A   | 2 | chr4  |
| FOXO1    | 1 | chr13 |
| CUX1     | 1 | chr7  |
| TEX2     | 2 | chr17 |

|          |   |       |
|----------|---|-------|
| CEP72    | 1 | chr5  |
| TMED10   | 1 | chr14 |
| CDH4     | 1 | chr20 |
| MACF1    | 3 | chr1  |
| CCT5     | 2 | chr5  |
| KCTD13   | 2 | chr16 |
| BANF2    | 1 | chr20 |
| TMEM41B  | 1 | chr11 |
| PLIN4    | 1 | chr19 |
| ENOSF1   | 2 | chr18 |
| CDH4     | 2 | chr20 |
| FADS2    | 1 | chr11 |
| KSR2     | 1 | chr12 |
| NTSR2    | 1 | chr2  |
| NR1I2    | 1 | chr3  |
| PEX14    | 3 | chr1  |
| PPIL4    | 1 | chr6  |
| VIPR2    | 1 | chr7  |
| KIAA0586 | 1 | chr14 |
| PPP1R26  | 1 | chr9  |
| NWD1     | 1 | chr19 |
| ANO9     | 1 | chr11 |
| CMC1     | 1 | chr3  |
| TRIM27   | 1 | chr6  |
| TRAPPC11 | 1 | chr4  |
| INF2     | 1 | chr14 |
| NGEF     | 1 | chr2  |
| NACC2    | 1 | chr9  |
| GPR123   | 1 | chr10 |
| GLB1L3   | 1 | chr11 |
| HDAC9    | 1 | chr7  |
| CTBP2    | 2 | chr10 |
| CNTRL    | 1 | chr9  |
| MAGEB3   | 1 | chrX  |
| RPSA     | 1 | chr3  |
| INF2     | 2 | chr14 |
| KDM4C    | 1 | chr9  |
| MAP2K5   | 1 | chr15 |
| PDE9A    | 2 | chr21 |
| RIMBP2   | 1 | chr12 |
| TSNARE1  | 1 | chr8  |
| COL4A2   | 1 | chr13 |
| IL1RAP   | 2 | chr3  |

|            |   |       |
|------------|---|-------|
| MUC5B      | 1 | chr11 |
| KIAA1217   | 1 | chr10 |
| FAM19A2    | 1 | chr12 |
| SYT1       | 1 | chr12 |
| ATP13A2    | 1 | chr1  |
| ZNF787     | 1 | chr19 |
| TENM2      | 1 | chr5  |
| SPECC1     | 1 | chr17 |
| LOC440970  | 1 | chr3  |
| ATG14      | 1 | chr14 |
| CNOT1      | 3 | chr16 |
| SLC25A25   | 2 | chr9  |
| ARSG       | 1 | chr17 |
| TBCE       | 1 | chr1  |
| DYSF       | 1 | chr2  |
| LRP8       | 1 | chr1  |
| PRKCI      | 1 | chr3  |
| RNF149     | 1 | chr2  |
| CRAT       | 1 | chr9  |
| HDAC4      | 1 | chr2  |
| CD38       | 1 | chr4  |
| ELMO1      | 1 | chr7  |
| SF3B3      | 1 | chr16 |
| KDM4B      | 1 | chr19 |
| JAKMIP1    | 1 | chr4  |
| MIR548F5   | 2 | chr13 |
| APBA2      | 1 | chr15 |
| CACNA1D    | 1 | chr3  |
| HOXD10     | 1 | chr2  |
| HS3ST4     | 1 | chr16 |
| TMEM8B     | 1 | chr9  |
| RGS10      | 1 | chr10 |
| SDCCAG8    | 1 | chr1  |
| LARP1B     | 6 | chr4  |
| ERICH1-AS1 | 1 | chr8  |
| AGAP1      | 1 | chr2  |
| MRTO4      | 1 | chr1  |
| LAMA5      | 3 | chr20 |
| PHIP       | 1 | chr6  |
| ZNF738     | 1 | chr19 |
| MYO9B      | 1 | chr19 |
| CASZ1      | 1 | chr1  |
| ZFHX3      | 1 | chr16 |

|              |   |       |
|--------------|---|-------|
| CPN2         | 1 | chr3  |
| SLC7A9       | 1 | chr19 |
| SENP6        | 1 | chr6  |
| CACNB2       | 2 | chr10 |
| STEAP3       | 1 | chr2  |
| FLJ37505     | 1 | chr12 |
| TMEM249      | 1 | chr8  |
| MAPK8IP1     | 1 | chr11 |
| FAM219A      | 1 | chr9  |
| GLI2         | 1 | chr2  |
| TNRC18       | 2 | chr7  |
| GOLGA3       | 3 | chr12 |
| KIAA0226     | 1 | chr3  |
| INO80D       | 2 | chr2  |
| GCH1         | 1 | chr14 |
| LOC100133050 | 1 | chr5  |
| SURF6        | 3 | chr9  |
| MEF2BNB      | 1 | chr19 |
| DGKD         | 1 | chr2  |
| FAM189A2     | 1 | chr9  |
| ACACB        | 1 | chr12 |
| SORBS2       | 1 | chr4  |
| LARGE        | 1 | chr22 |
| ERGIC1       | 1 | chr5  |
| ZFP82        | 1 | chr19 |
| DTNB         | 1 | chr2  |
| ZNF500       | 1 | chr16 |
| CYFIP1       | 1 | chr15 |
| PDZD8        | 1 | chr10 |
| KHSRP        | 1 | chr19 |
| CREBL2       | 1 | chr12 |
| MEF2D        | 1 | chr1  |
| OPA3         | 1 | chr19 |
| BAZ1A        | 1 | chr14 |
| NBPF9        | 1 | chr1  |
| EPPK1        | 3 | chr8  |
| TM7SF3       | 1 | chr12 |
| C20orf85     | 1 | chr20 |
| PLEC         | 1 | chr8  |
| AKR7L        | 1 | chr1  |
| KCNT1        | 1 | chr9  |
| KANK1        | 4 | chr9  |
| CACNA1A      | 1 | chr19 |

|            |   |       |
|------------|---|-------|
| PFKL       | 1 | chr21 |
| TRDMT1     | 1 | chr10 |
| MACROD2    | 1 | chr20 |
| NFAT5      | 1 | chr16 |
| NLRP2      | 3 | chr19 |
| MCAT       | 1 | chr22 |
| FAR1       | 1 | chr11 |
| VPS26A     | 1 | chr10 |
| DCDC2      | 1 | chr6  |
| MAP3K12    | 1 | chr12 |
| FBRSL1     | 1 | chr12 |
| PMEPA1     | 1 | chr20 |
| BFSP2      | 1 | chr3  |
| MRGPRX2    | 1 | chr11 |
| WDR1       | 1 | chr4  |
| LRRC15     | 1 | chr3  |
| PHF17      | 1 | chr4  |
| VDR        | 2 | chr12 |
| TMC5       | 1 | chr16 |
| TACC3      | 1 | chr4  |
| LINGO2     | 1 | chr9  |
| PDXK       | 2 | chr21 |
| APBB2      | 2 | chr4  |
| ZNF454     | 1 | chr5  |
| ESR1       | 2 | chr6  |
| GTF2IRD1P1 | 1 | chr7  |
| MSI2       | 1 | chr17 |
| STK40      | 1 | chr1  |
| MAEA       | 1 | chr4  |
| MUC4       | 2 | chr3  |
| COLEC11    | 1 | chr2  |
| UGT1A3     | 1 | chr2  |
| STIM1      | 1 | chr11 |
| GOLGB1     | 1 | chr3  |
| TPCN2      | 1 | chr11 |
| JARID2     | 1 | chr6  |
| PRDM15     | 1 | chr21 |
| OSBPL3     | 1 | chr7  |
| GPC1       | 1 | chr2  |
| RTEL1      | 1 | chr20 |
| MRPL54     | 2 | chr19 |
| TBC1D20    | 1 | chr20 |
| METAP1D    | 1 | chr2  |

|              |   |       |
|--------------|---|-------|
| XRN2         | 2 | chr20 |
| LOC100009676 | 1 | chr3  |
| FLI1         | 1 | chr11 |
| ATG4B        | 1 | chr2  |
| HRNR         | 1 | chr1  |
| LAMA4        | 1 | chr6  |
| GMDS         | 1 | chr6  |
| NUP210       | 1 | chr3  |
| CACNA1H      | 1 | chr16 |
| SVIL         | 1 | chr10 |
| LOC100286922 | 1 | chr2  |
| UGT1A8       | 1 | chr2  |
| CMPK1        | 1 | chr1  |
| SIX2         | 1 | chr2  |
| PHACTR4      | 1 | chr1  |
| WNK2         | 1 | chr9  |
| GRIK2        | 1 | chr6  |
| CNOT1        | 2 | chr16 |
| YIPF4        | 1 | chr2  |
| ACYP1        | 1 | chr14 |
| GTF3C1       | 1 | chr16 |
| CDHR2        | 1 | chr5  |
| AKT1         | 1 | chr14 |
| UGT1A4       | 1 | chr2  |
| MORC2-AS1    | 1 | chr22 |
| SLC39A11     | 1 | chr17 |
| LINC00290    | 1 | chr4  |
| KIAA1211L    | 1 | chr2  |
| GREM1        | 2 | chr15 |
| NRG1         | 2 | chr8  |
| ZNF550       | 1 | chr19 |
| LIN54        | 1 | chr4  |
| NXN          | 1 | chr17 |
| TMEM104      | 1 | chr17 |
| CDK16        | 1 | chrX  |
| LPIN1        | 1 | chr2  |
| AGPS         | 1 | chr2  |
| VPS53        | 1 | chr17 |
| VPS54        | 1 | chr2  |
| KREMEN1      | 1 | chr22 |
| NELFB        | 1 | chr9  |
| MMAB         | 1 | chr12 |
| THRB         | 1 | chr3  |

|                |   |       |
|----------------|---|-------|
| LMF1           | 1 | chr16 |
| BLOC1S5-TXNDC5 | 1 | chr6  |
| AES            | 1 | chr19 |
| ANAPC2         | 1 | chr9  |
| PI4KAP1        | 1 | chr22 |
| DOC2B          | 1 | chr17 |
| WISP1          | 1 | chr8  |
| KLHDC4         | 1 | chr16 |
| DNMT3B         | 1 | chr20 |
| EP400          | 1 | chr12 |
| EHMT1          | 1 | chr9  |
| PGS1           | 3 | chr17 |
| LOC440704      | 1 | chr1  |
| KCNK17         | 2 | chr6  |
| COL9A3         | 1 | chr20 |
| SCML4          | 1 | chr6  |
| STMN3          | 1 | chr20 |
| GEMIN7         | 2 | chr19 |
| PPP5D1         | 1 | chr19 |
| PLA2G4E        | 1 | chr15 |
| SLC24A3        | 1 | chr20 |
| TWSG1          | 1 | chr18 |
| RTEL1-TNFRSF6B | 1 | chr20 |
| PDE3A          | 1 | chr12 |
| ZNF275         | 1 | chrX  |
| AP3M1          | 1 | chr10 |
| BAIAP2         | 1 | chr17 |
| CCND3          | 1 | chr6  |
| DLGAP2         | 1 | chr8  |
| CLCN4          | 1 | chrX  |
| MACROD1        | 1 | chr11 |
| SH3BP2         | 1 | chr4  |
| KIF1A          | 1 | chr2  |
| ATXN1          | 1 | chr6  |
| DDX6           | 1 | chr11 |
| FAM46C         | 1 | chr1  |
| EML2           | 1 | chr19 |
| SBSN           | 1 | chr19 |
| GLDC           | 1 | chr9  |
| NECAB1         | 1 | chr8  |
| SORCS2         | 4 | chr4  |
| TBC1D14        | 1 | chr4  |
| C14orf159      | 1 | chr14 |



|          |   |       |
|----------|---|-------|
| MGMT     | 2 | chr10 |
| PNPLA3   | 1 | chr22 |
| HHIPL2   | 1 | chr1  |
| TRIM36   | 1 | chr5  |
| HSPA7    | 1 | chr1  |
| CABP1    | 1 | chr12 |
| RBFOX1   | 1 | chr16 |
| ERC1     | 1 | chr12 |
| C7orf50  | 1 | chr7  |
| NAV2     | 1 | chr11 |
| KLF12    | 1 | chr13 |
| REXO1    | 1 | chr19 |
| FBXW8    | 1 | chr12 |
| SLC29A4  | 1 | chr7  |
| INO80    | 2 | chr15 |
| CLPTM1L  | 1 | chr5  |
| TSSC1    | 1 | chr2  |
| BLOC1S5  | 1 | chr6  |
| RNF10    | 1 | chr12 |
| BAI3     | 1 | chr6  |
| ZNF493   | 1 | chr19 |
| UGT1A9   | 1 | chr2  |
| PTPRG    | 2 | chr3  |
| ZFPM2    | 1 | chr8  |
| NBEA     | 2 | chr13 |
| CCDC109B | 1 | chr4  |
| FGF2     | 1 | chr4  |
| CTSD     | 1 | chr11 |
| KANK1    | 2 | chr9  |
| ANGPT2   | 1 | chr8  |
| MICAL3   | 2 | chr22 |
| SLC7A5   | 1 | chr16 |
| EYA4     | 2 | chr6  |
| PRKCZ    | 2 | chr1  |
| CAB39L   | 1 | chr13 |
| FBXL18   | 2 | chr7  |
| APAF1    | 1 | chr12 |
| KCNQ1    | 1 | chr11 |
| CHMP2A   | 1 | chr19 |
| ROR2     | 1 | chr9  |
| RBFOX1   | 4 | chr16 |
| ANKMY1   | 4 | chr2  |
| SENP5    | 2 | chr3  |

|              |   |       |
|--------------|---|-------|
| PRKAG2       | 1 | chr7  |
| TNN          | 1 | chr1  |
| AGBL4        | 1 | chr1  |
| PODN         | 1 | chr1  |
| UVSSA        | 1 | chr4  |
| C2orf83      | 1 | chr2  |
| LOC100130992 | 1 | chr10 |
| MYBBP1A      | 1 | chr17 |
| MMP25        | 2 | chr16 |
| SIPA1L3      | 1 | chr19 |
| ANP32E       | 2 | chr1  |
| KCNMA1       | 1 | chr10 |
| DOK6         | 1 | chr18 |
| QSOX2        | 1 | chr9  |
| ANHX         | 1 | chr12 |
| ENPP6        | 2 | chr4  |
| KANSL1       | 1 | chr17 |
| KLRD1        | 2 | chr12 |
| PTPN9        | 1 | chr15 |
| GAS7         | 1 | chr17 |
| SCFD2        | 1 | chr4  |
| TNPO3        | 1 | chr7  |
| WDR37        | 1 | chr10 |
| TBC1D22A     | 2 | chr22 |
| LMNB2        | 1 | chr19 |
| FLJ12825     | 1 | chr12 |
| CHMP5        | 1 | chr9  |
| SYTL3        | 1 | chr6  |
| ESR1         | 1 | chr6  |
| UGT1A7       | 1 | chr2  |
| PIGG         | 2 | chr4  |
| TNS3         | 2 | chr7  |
| CAPG         | 3 | chr2  |
| PPFIA3       | 1 | chr19 |
| WDR7         | 1 | chr18 |
| NFIC         | 1 | chr19 |
| WDR24        | 1 | chr16 |
| LONRF2       | 1 | chr2  |
| RERE         | 2 | chr1  |
| SYT6         | 1 | chr1  |
| LOC441601    | 1 | chr11 |
| IL32         | 1 | chr16 |
| AFAP1        | 1 | chr4  |

|               |    |       |
|---------------|----|-------|
| LONP1         | 1  | chr19 |
| HTT           | 1  | chr4  |
| TMF1          | 1  | chr3  |
| SGSM1         | 1  | chr22 |
| SLC9C1        | 1  | chr3  |
| DMRT2         | 1  | chr9  |
| STARD4-AS1    | 1  | chr5  |
| LOC389634     | 1  | chr12 |
| USP48         | 2  | chr1  |
| PGBD5         | 1  | chr1  |
| TSPAN11       | 1  | chr12 |
| C1orf151-NBL1 | 1  | chr1  |
| ITIH5         | 1  | chr10 |
| POU4F2        | 1  | chr4  |
| KIAA1967      | 2  | chr8  |
| CARD14        | 1  | chr17 |
| PPARD         | 1  | chr6  |
| MAP2K7        | 1  | chr19 |
| PRR24         | 1  | chr19 |
| ZDHHC14       | 1  | chr6  |
| CUL4A         | 1  | chr13 |
| PBRM1         | 1  | chr3  |
| CCL25         | 1  | chr19 |
| MEF2BNB-MEF2B | 1  | chr19 |
| NFASC         | 1  | chr1  |
| MLLT10        | 1  | chr10 |
| ATP8B4        | 3  | chr15 |
| APOBEC3H      | 2  | chr22 |
| ANTXR2        | 17 | chr4  |
| DAPK1         | 1  | chr9  |
| GALNT7        | 1  | chr4  |
| MYO7A         | 2  | chr11 |
| WDSUB1        | 2  | chr2  |
| SMAP1         | 1  | chr6  |
| MDGA1         | 1  | chr6  |
| UGT1A10       | 1  | chr2  |
| MOB2          | 1  | chr11 |
| CHFR          | 5  | chr12 |
| GNG7          | 1  | chr19 |
| CDH18         | 2  | chr5  |
| SYNPR         | 2  | chr3  |
| SGK1          | 1  | chr6  |
| RDH13         | 1  | chr19 |

|           |   |       |
|-----------|---|-------|
| MYCBPAP   | 1 | chr17 |
| IFT27     | 3 | chr22 |
| NAPA      | 1 | chr19 |
| LY86-AS1  | 1 | chr6  |
| MCPH1     | 1 | chr8  |
| DPP10     | 1 | chr2  |
| PRDM16    | 1 | chr1  |
| MIR5009   | 1 | chr21 |
| MEGF6     | 1 | chr1  |
| RPRD2     | 4 | chr1  |
| ZMAT3     | 1 | chr3  |
| NALCN-AS1 | 1 | chr13 |
| RIBC2     | 1 | chr22 |
| TGIF1     | 2 | chr18 |
| NFATC1    | 4 | chr18 |
| UGGT2     | 1 | chr13 |

**site locations**

130874245

3621933

78067456

12225207

157454478,157606110,158349807

674370,664082

4622638

21288836

22479988

106402969

116086817,116086818

101654460,101761168

18706287

138831135

101118167,101118178,101118180,101118216,101118232,101118235,101118246,101118248

16624957

3172913

218802990

419921,419974

3000633,3062322

64479342

46711447

8053059

118844761

33601000

154150241

3451152

102277334

18384675

61547236,61547237

57986974

36049594,36049601

25551130

35084200

245393901

25248474

111114534

55464790

39933047

8088757

3350740,3620826,4656635

124826676,124995813

234663653  
77943467  
119206373  
59938978  
26899124  
45068112  
109717108  
77202645,77220878,77221799  
1917127  
61340967  
8505453  
139091549  
18183527  
49062539,49062544  
70425843  
45339208  
1655489  
12956530  
42910374  
74574323  
11988839  
176889359  
95375286  
5847195  
76160100  
2261683  
41200425  
145252482  
10278677  
21474934  
62049177  
163501131  
158062337  
40391964  
658048  
6132067  
1956361  
234663653  
50288630  
1645478,1663210  
41217203  
101771662  
62233645,62243646

640726  
75639854  
60432232  
39577117,39577199,39683297  
10253162,10253312  
29921210,29921211  
17686898  
9311701  
4512512  
696500,696502  
59897399,60432232  
61609749  
118169150  
11809894  
119533732  
10612073,10631814,10640437  
149846961  
158896515  
58914418  
138377899  
16843835  
433904  
28296877  
28882096  
184631918  
105170221  
233770144  
138905214  
134912150  
134162865  
18531432  
126719831,126719832  
123926393  
30250321  
39450360  
105170221,105171845  
7147974  
67883998  
44152788,44152488  
130935502  
143382143  
111134778  
190352746,190352783

1271429  
24516752  
62541379  
79744327  
17313341  
56621183  
167011860  
20065618  
84695352  
55874093  
58560322,58610256,58610257  
130842141,130845150  
66354791  
235600208  
71797711  
53742736  
169971406  
101894221  
131863236  
240156784  
15779999  
37463048  
70570289  
4977744  
6073246  
36049594,36049601  
29409676  
53769479  
176982491  
26031806  
35846606  
121301386  
243651458  
128987146,128987362,128987417,128987424,128987921,129018407  
1042396  
236679058  
19583733  
60926221,60930091,60938308  
79701971  
21543403  
17283402  
10828178  
73001596



194063152  
33354403  
76382861  
18565703,18565704  
120012170  
128375623  
145577616  
45923465  
34400580  
121634009  
5355940,5361230  
133366240,133373503,133365918  
197403563  
206904061,206911227  
55363590  
99715564  
136199464,136199465,136199502  
19289673  
234375976  
71951803  
109637186  
186697926  
34060801  
172313210  
36893856  
25638407  
4811178  
22896102  
119126778  
6417884  
12771409  
156448424  
46069034  
35302603  
144615192  
144941419,144946817,144946818  
27138950  
56733571  
145004544  
19596138  
138597287  
655106,580997,736017,736018  
13371413

45731671  
17239947  
14827364  
69662907  
55494187,55495378,55484293  
43529312  
13695712  
70910031  
24301369  
53885310  
133118219  
56245312  
133169726  
19077804  
10081200  
194077617  
129743452  
48257325,48257326  
19460424  
1739976  
29110581  
45142779,45160245  
41051019,41087062  
178383952  
152077845,152343843  
66289040  
55521935  
36810010  
1316894  
195535322,195535323  
3648757  
234663653  
3936650  
121407725  
68821860  
15497829  
43240355  
24964485  
241403232  
62301969  
3767264,3767265  
432779  
172901511

21301178,21330991  
101397085  
128611282  
242610500  
152187892  
112505108  
1708771  
13367405  
1270066  
29780291  
234663653  
234663653  
47828187  
45233666  
28756657  
95960469  
101891915  
58610256,58610257  
32516377  
75528578  
27491291  
176011887  
105249322  
234663653  
31318743  
70738075  
182008236  
99414823  
33021466,33021467  
31505899,32315683  
58060536  
83896149  
743982  
72784649  
47086345  
11875366  
178331204  
509519  
64203245  
29544164  
140160085  
109996343  
24245237

1012567  
8053059  
3053685  
140080581  
20394006  
14982  
134230643  
87773917  
31353415  
132558689  
140589218  
76400505,76400506,76414300  
190675884  
39271537,39271538  
61471745  
108099312  
62278385  
45584540,45587004  
47044588  
42326258  
19222060  
9386027  
62301969  
20704570  
152613111  
75893633  
79063592  
41987787  
1498403  
10132822  
63824364  
2829476  
241674447  
16692260  
118659488  
118168565  
46138998  
36018946  
6624973  
91887876  
7306844,7351443,7430418,7738401  
6971604  
91609532

131323099,131323100  
44340903  
222704637  
114511548  
161575967  
121088884  
7660583  
1421739  
1044953  
19882060  
74509345  
1832316  
117465712  
5338900  
41400561,41400562  
1331692  
3216288  
8053059  
120987390  
69832026  
21582213  
234663653  
61615095,61712593  
106500939  
36049594,36049601  
110600567  
123787320  
1777815  
736017,736018  
6365738  
18271709,18273461  
87871580  
133601687,133601824  
2041154,2048727  
49947050  
5541655,5544317  
99112078  
2495420  
59064635  
94524476  
6070771,6507637,6769736,7660583  
241497366,241497368,241497379,241497404  
196596234,196634118

151390749  
175075817  
49540020  
53537264  
1374695  
228491315  
22541914  
4444163  
3101637,3102462  
38627237  
150194484,150202102  
79088889  
67361019  
139101706  
133812284  
185037248,185037323  
44196828  
10465362,10465363  
75778309  
9944081  
54198305  
128671100  
1151618  
47508572,47557636  
2448661  
54500278  
33269800  
159180009  
152343843  
234663653  
524881,531139  
47469946,47469947  
85640626,85640697,85640725  
49629845  
54333582  
3404316  
737791  
100937114  
8421091,8421092  
114654852  
50256869  
3116369  
7812672

5696960  
3234979  
69089846  
25228296  
111903460  
1053495  
110867863  
8541630  
22100962,22100963  
230552128  
31133655  
19964097  
7668224  
147560155  
22471822,22471823  
78164070  
35391786  
7969900  
47778710  
157932677  
113906308  
52666865  
8124738  
19289673  
204907738  
21883429  
50239356,50239403,50239404  
39496742,39496901  
80885897,80885901,80885910,80885930,80885952,80885978,80885979,80885980,8088598  
90143574  
174136997  
76862024,76862025  
160102680,160102724  
71505659  
37606303  
234663653  
1777815  
133428241,133456221,133420273,133452074,133453540  
2666007  
19573547,19654863  
63269641,63328784  
134627284  
55558596

48589244  
37159436,37159441,37159532  
48007096  
6468440  
6365738  
115594262  
3239848  
28720328  
3457896  
150375271,150410977,150423966,150423967  
178750202  
101608210  
45826878  
3428523,3434261  
77202645,77220878,77221799,77246977  
96580854



8,101118250
