# Supplementary material
Source: PubMed Central journal article supplement (PMC6348426)
Supplement: methylationSupplementaryFile3.pdf [file methylationSupplementaryFile3.pdf]

### Supplementary File 3: qRT-PCR specifications

| Gene           | Annealing temperature | Forward primer          | Reverse primer          | Probe                      |
|----------------|-----------------------|-------------------------|-------------------------|----------------------------|
| <i>SLC36A1</i> | 60 ° C                | 5' AAGGCAGCATAACCCTCAAC | 5'-GAACTGGAGTGCGTAGGTGA | 5'-TGCCCAACTGCTGGTTGTACCAG |
| <i>PTPRN2</i>  | 58 ° C                | 5'-TACGTCCTGATCGACATGGT | 5'-TCAAAGTCTCCTTCGTCTG  | 5'-CGGGTCTCCGGTCCCTCAAG    |
| <i>CASZ1</i>   | 60 ° C                | 5'-CGACTGCAGCGTCTACTACC | 5'-GACGTGCTCGTGTACACCTT | 5'-CAGCCCACCTGCATGCAGTG    |
| <i>IL10</i>    | 56 ° C                | 5'-TGAGAACCAAGACCCAGACA | 5'-AAAGGCATTCTTCACCTGCT | 5'-TCGATGACAGCGCCGTAGCC    |
