# Supplementary material
Source: PubMed Central journal article supplement (PMC6348426)
Supplement: methylationSupplementaryFile4.pdf [file methylationSupplementaryFile4.pdf]

**Supplementary File 4.**

**A.**

| <b>Group</b> | <b>Autosomes</b> | <b>chrX</b>       | <b>chrY</b>       | <b>ALL</b>        |
|--------------|------------------|-------------------|-------------------|-------------------|
| AGA          | 50.672 (0.957)   | 49.790<br>(2.474) | 51.793<br>(3.926) | 50.603<br>(0.950) |
| LGA          | 50.560 (1.468)   | 50.268<br>(3.204) | 52.877<br>(1.335) | 50.520<br>(1.526) |
| IUGR         | 51.122 (0.964)   | 50.757<br>(2.581) | 52.413<br>(0.694) | 51.068<br>(1.016) |

**B.**

| <b>T-test <i>P</i> value</b> | <b>LGA vs. AGA</b> | <b>IUGR vs. AGA</b> | <b>LGA vs. IUGR</b> |
|------------------------------|--------------------|---------------------|---------------------|
| Autosomes                    | 0.882              | 0.436               | 0.464               |
| chrX                         | 0.786              | 0.523               | 0.785               |
| chrY                         | 0.674              | 0.801               | 0.622               |
| ALL                          | 0.614              | 0.432               | 0.493               |
