# Supplementary material
Source: PubMed Central journal article supplement (PMC6348426)
Supplement: methylationSupplementaryFile7.pdf [file methylationSupplementaryFile7.pdf]

**Supplementary File 7: Average CG methylation level (%) of 3 groups in male and female samples by birthweight cohort**

| <b>Gender</b> | <b>Group</b> | <b>Autosomes</b>  | <b>chrX</b>       | <b>chrY</b>       | <b>ALL</b>        |
|---------------|--------------|-------------------|-------------------|-------------------|-------------------|
| Male          | AGA          | 50.503<br>(1.089) | 51.733<br>(1.376) | 51.793<br>(3.926) | 50.540<br>(1.100) |
|               | LGA          | 51.173<br>(0.892) | 52.493<br>(0.631) | 52.877<br>(1.335) | 51.213<br>(0.885) |
|               | IUGR         | 51.500<br>(0.552) | 52.850<br>(0.239) | 52.413<br>(0.694) | 51.540<br>(0.542) |
| Female        | AGA          | 50.840<br>(1.009) | 47.847<br>(1.443) |                   | 50.667<br>(1.017) |
|               | LGA          | 49.640<br>(2.051) | 46.930<br>(1.768) |                   | 49.480<br>(2.036) |
|               | IUGR         | 50.743<br>(1.261) | 48.663<br>(1.856) |                   | 50.597<br>(1.272) |

Brackets indicate Standard Deviation
