# Supplementary material
Source: PubMed Central journal article supplement (PMC6348426)
Supplement: methylationSupplementaryFile9.pdf [file methylationSupplementaryFile9.pdf]

| <b>DMR_coordinate</b>     | <b>DMR size</b> | <b>z-score</b> | <b>Δ methylation<br/>(IUGR-AGA)</b> |       |
|---------------------------|-----------------|----------------|-------------------------------------|-------|
| chr20:60950552-60950644   |                 | 92             | 9.76                                | 0.616 |
| chr7:39872970-39873071    |                 | 101            | 12.75                               | 0.562 |
| chr18:73766095-73766169   |                 | 74             | 6.16                                | 0.56  |
| chr19:18111601-18111624   |                 | 23             | 4.29                                | 0.515 |
| chr4:132683695-132683768  |                 | 73             | 8.19                                | 0.508 |
| chr16:85620235-85620254   |                 | 19             | 7.98                                | 0.508 |
| chr10:10493533-10493590   |                 | 57             | 5.87                                | 0.5   |
| chr19:12480152-12480245   |                 | 93             | 8.89                                | 0.495 |
| chr10:133923015-133923061 |                 | 46             | 7.35                                | 0.492 |
| chr22:41634641-41634708   |                 | 67             | 5.21                                | 0.486 |
| chr2:204592301-204592358  |                 | 57             | 4.02                                | 0.477 |
| chr21:29170494-29170584   |                 | 90             | 5.24                                | 0.473 |
| chr20:49078681-49078762   |                 | 81             | 6.38                                | 0.465 |
| chr2:222388858-222388939  |                 | 81             | 7.34                                | 0.438 |
| chr12:124877140-124877197 |                 | 57             | 4.7                                 | 0.435 |
| chr8:143437093-143437183  |                 | 90             | 4.78                                | 0.432 |
| chr15:40894318-40894381   |                 | 63             | 6.16                                | 0.42  |
| chr15:45021622-45021671   |                 | 49             | 4.72                                | 0.415 |
| chr1:2797592-2797661      |                 | 69             | 6.88                                | 0.415 |
| chr10:12376347-12376414   |                 | 67             | 6.31                                | 0.408 |
| chr1:28118046-28118108    |                 | 62             | 4.61                                | 0.408 |
| chr1:245337245-245337305  |                 | 60             | 6.05                                | 0.407 |
| chr22:19620031-19620099   |                 | 68             | 5.93                                | 0.407 |
| chr19:12671669-12671715   |                 | 46             | 5.77                                | 0.407 |
| chr6:125286439-125286509  |                 | 70             | 5.25                                | 0.405 |
| chr1:216909713-216909776  |                 | 63             | 4.99                                | 0.403 |
| chrY:4822710-4822750      |                 | 40             | 5.44                                | 0.403 |
| chr10:63669122-63669171   |                 | 49             | 4.69                                | 0.398 |
| chr19:12882618-12882650   |                 | 32             | 4.44                                | 0.397 |
| chr2:154823159-154823177  |                 | 18             | 4.98                                | 0.395 |
| chr19:831145-831184       |                 | 39             | 4.9                                 | 0.395 |
| chr21:44829483-44829557   |                 | 74             | 4.86                                | 0.395 |
| chr13:104109559-104109599 |                 | 40             | 4.65                                | 0.394 |
| chr8:112074877-112074911  |                 | 34             | 4.25                                | 0.393 |
| chr19:12852361-12852443   |                 | 82             | 6.81                                | 0.39  |
| chr4:147271271-147271342  |                 | 71             | 6.9                                 | 0.384 |
| chr1:94261930-94262006    |                 | 76             | 7.02                                | 0.383 |
| chr14:104751257-104751291 |                 | 34             | 4.73                                | 0.375 |
| chr1:228771891-228771949  |                 | 58             | 5.23                                | 0.371 |
| chr6:8041964-8042130      |                 | 166            | 7.15                                | 0.37  |
| chrX:48698000-48698018    |                 | 18             | 4.79                                | 0.37  |
| chr11:116371571-116371591 |                 | 20             | 6.66                                | 0.369 |

|                           |     |       |       |
|---------------------------|-----|-------|-------|
| chr2:207069312-207069376  | 64  | 6.05  | 0.367 |
| chr14:24458195-24458233   | 38  | 6.38  | 0.367 |
| chr15:32696981-32697047   | 66  | 5.53  | 0.367 |
| chr1:6099124-6099157      | 33  | 5.16  | 0.365 |
| chr16:89523397-89523437   | 40  | 4.58  | 0.365 |
| chr8:144454655-144454725  | 70  | 6.22  | 0.364 |
| chr6:142290823-142290863  | 40  | 5.46  | 0.363 |
| chr5:102028776-102028858  | 82  | 5.93  | 0.362 |
| chrY:1433003-1433037      | 34  | 5.16  | 0.362 |
| chr4:165022241-165022333  | 92  | 4.45  | 0.361 |
| chr11:2828162-2828249     | 87  | 4.57  | 0.36  |
| chr16:29693270-29693345   | 75  | 5.31  | 0.357 |
| chrY:13310708-13310722    | 14  | 4.97  | 0.357 |
| chr10:61642483-61642575   | 92  | 5.61  | 0.356 |
| chr7:1392101-1392154      | 53  | 5.64  | 0.355 |
| chr1:87260637-87260721    | 84  | 6.88  | 0.353 |
| chr10:83683239-83683257   | 18  | 4.92  | 0.348 |
| chr19:30704000-30704049   | 49  | 4.24  | 0.348 |
| chr2:237814044-237814133  | 89  | 6.2   | 0.347 |
| chr18:77219587-77219673   | 86  | 5.78  | 0.347 |
| chr17:48585421-48585486   | 65  | 5.76  | 0.347 |
| chrX:134532748-134532784  | 36  | 4.25  | 0.346 |
| chr19:7722381-7722479     | 98  | 4.14  | 0.346 |
| chr16:1224971-1225066     | 95  | 5.56  | 0.345 |
| chr11:98112927-98113005   | 78  | 5.01  | 0.345 |
| chr1:206941320-206941367  | 47  | 5.48  | 0.344 |
| chr20:29571910-29571966   | 56  | 4.5   | 0.343 |
| chr17:56085810-56085899   | 89  | 6.12  | 0.34  |
| chrX:67458975-67459069    | 94  | 5.48  | 0.34  |
| chr10:134293880-134293965 | 85  | 6.01  | 0.338 |
| chr15:52264741-52264876   | 135 | 6.42  | 0.337 |
| chrX:118528291-118528309  | 18  | 4.53  | 0.336 |
| chr7:57089012-57089054    | 42  | 4.48  | 0.335 |
| chr3:81218952-81219024    | 72  | 4.28  | 0.335 |
| chr2:225906662-225906751  | 89  | 4.43  | 0.335 |
| chr4:43553249-43553331    | 82  | 5.68  | 0.334 |
| chr2:97215928-97216029    | 101 | 12.66 | 0.333 |
| chr6:38101249-38101327    | 78  | 5.95  | 0.333 |
| chr10:35858323-35858410   | 87  | 4.41  | 0.333 |
| chr21:44764673-44764713   | 40  | 4.07  | 0.333 |
| chr20:62026243-62026321   | 78  | 5.81  | 0.332 |
| chr3:6109823-6109895      | 72  | 6.19  | 0.331 |
| chr8:52094031-52094140    | 109 | 4.94  | 0.33  |
| chrY:18958981-18958999    | 18  | 5.74  | 0.33  |

|                           |     |       |       |
|---------------------------|-----|-------|-------|
| chr19:33918820-33918869   | 49  | 4.14  | 0.33  |
| chr1:1912712-1912811      | 99  | 5.3   | 0.329 |
| chr10:27267871-27267917   | 46  | 5.62  | 0.328 |
| chr1:3038591-3038678      | 87  | 5.29  | 0.327 |
| chrY:13478030-13478105    | 75  | 5.8   | 0.325 |
| chr7:148677970-148678030  | 60  | 5.86  | 0.324 |
| chr16:1797290-1797383     | 93  | 4.38  | 0.323 |
| chr10:133949951-133950019 | 68  | 4.29  | 0.323 |
| chrX:103277229-103277254  | 25  | 5.53  | 0.322 |
| chr13:47039931-47040082   | 151 | 5.97  | 0.321 |
| chr6:167837078-167837158  | 80  | 6.27  | 0.32  |
| chr4:37821661-37821714    | 53  | 4.95  | 0.32  |
| chr2:225229444-225229543  | 99  | 4.36  | 0.32  |
| chr8:116049919-116050018  | 99  | 4.69  | 0.318 |
| chr7:98287154-98287196    | 42  | 4.36  | 0.318 |
| chr13:64403541-64403617   | 76  | 5.5   | 0.318 |
| chr5:81731049-81731140    | 91  | 9     | 0.318 |
| chr6:9399392-9399487      | 95  | 5.16  | 0.316 |
| chr21:41356546-41356638   | 92  | 6.06  | 0.315 |
| chr17:39975485-39975602   | 117 | 6.4   | 0.314 |
| chr8:34951917-34951924    | 7   | 4.31  | 0.314 |
| chrX:24041077-24041148    | 71  | 4.43  | 0.313 |
| chr8:2904130-2904239      | 109 | 5.09  | 0.312 |
| chr5:135123847-135123906  | 59  | 5.53  | 0.31  |
| chr19:6779842-6779938     | 96  | 5.48  | 0.31  |
| chr2:64203122-64203160    | 38  | 4.72  | 0.31  |
| chr8:1910891-1910915      | 24  | 4.57  | 0.31  |
| chr2:131913165-131913251  | 86  | 5.2   | 0.309 |
| chrY:5479875-5479935      | 60  | 4.16  | 0.307 |
| chrX:48826005-48826048    | 43  | 5.76  | 0.305 |
| chr1:939038-939129        | 91  | 6.91  | 0.302 |
| chr18:77157487-77157520   | 33  | 5.29  | 0.302 |
| chr2:148927666-148927762  | 96  | 8.15  | 0.301 |
| chrX:136509398-136509493  | 95  | 4.87  | 0.301 |
| chr17:19633634-19633696   | 62  | 5.73  | 0.3   |
| chr9:137298389-137298483  | 94  | 4.96  | 0.3   |
| chr7:72896087-72896163    | 76  | 4.38  | 0.3   |
| chr9:139154078-139154159  | 81  | 4.18  | 0.3   |
| chr4:75648489-75648565    | 76  | 5.77  | 0.299 |
| chr6:15222942-15222999    | 57  | 5.63  | 0.298 |
| chr14:95254585-95254649   | 64  | 4.47  | 0.298 |
| chr10:50649667-50649757   | 90  | 5.76  | 0.297 |
| chr17:48224832-48224890   | 58  | 5.18  | 0.297 |
| chr11:6206677-6206848     | 171 | 11.38 | 0.297 |

|                           |     |      |       |
|---------------------------|-----|------|-------|
| chr4:5807907-5807953      | 46  | 4.03 | 0.297 |
| chrY:18745835-18745978    | 143 | 5.89 | 0.297 |
| chr16:79729506-79729563   | 57  | 4.38 | 0.295 |
| chr1:223936360-223936442  | 82  | 7.74 | 0.295 |
| chr6:17728998-17729091    | 93  | 7.34 | 0.294 |
| chr16:1267893-1267994     | 101 | 7.15 | 0.293 |
| chr17:17592483-17592569   | 86  | 5.41 | 0.292 |
| chr16:85555499-85555538   | 39  | 4.68 | 0.292 |
| chr5:31302252-31302333    | 81  | 4.19 | 0.292 |
| chr9:38042043-38042098    | 55  | 4.33 | 0.292 |
| chr2:138266193-138266236  | 43  | 4.84 | 0.29  |
| chr10:50966567-50966615   | 48  | 6.01 | 0.29  |
| chr6:27107000-27107099    | 99  | 5.63 | 0.29  |
| chr13:20966048-20966133   | 85  | 5.3  | 0.29  |
| chr15:71466625-71466634   | 9   | 4.56 | 0.29  |
| chr3:145909700-145909786  | 86  | 6.87 | 0.289 |
| chr1:6217838-6217930      | 92  | 4.48 | 0.288 |
| chr22:49464807-49464840   | 33  | 6.85 | 0.288 |
| chrX:17722652-17722710    | 58  | 5.2  | 0.288 |
| chr3:87737838-87737856    | 18  | 5.25 | 0.288 |
| chrX:133650399-133650450  | 51  | 5.01 | 0.287 |
| chr2:73430550-73430703    | 153 | 8.15 | 0.287 |
| chr9:140069339-140069424  | 85  | 6.4  | 0.287 |
| chr10:134292468-134292572 | 104 | 5.32 | 0.286 |
| chr16:435686-435770       | 84  | 4.82 | 0.286 |
| chr19:47127190-47127273   | 83  | 10.4 | 0.285 |
| chr22:17363339-17363357   | 18  | 5.19 | 0.285 |
| chr5:104854679-104854719  | 40  | 4.78 | 0.285 |
| chr9:92058146-92058175    | 29  | 4.78 | 0.284 |
| chr8:22458181-22458210    | 29  | 4.39 | 0.283 |
| chr3:151912005-151912148  | 143 | 8.03 | 0.282 |
| chr22:50305326-50305334   | 8   | 5.12 | 0.28  |
| chr19:55707925-55707979   | 54  | 4.73 | 0.28  |
| chr7:66964710-66964770    | 60  | 4.61 | 0.28  |
| chr22:49042254-49042289   | 35  | 5.94 | 0.28  |
| chr9:136994689-136994759  | 70  | 6.96 | 0.279 |
| chr12:131493229-131493313 | 84  | 4.63 | 0.278 |
| chr5:1905794-1905833      | 39  | 4.17 | 0.278 |
| chrX:18893074-18893162    | 88  | 8.65 | 0.277 |
| chr10:8062158-8062221     | 63  | 4.49 | 0.277 |
| chr9:136451014-136451086  | 72  | 7.41 | 0.276 |
| chr1:149719435-149719532  | 97  | 6.55 | 0.276 |
| chr18:76682855-76682951   | 96  | 4.83 | 0.276 |
| chr3:125447970-125448023  | 53  | 5.42 | 0.274 |

|                           |     |       |       |
|---------------------------|-----|-------|-------|
| chr13:84145366-84145450   | 84  | 4.87  | 0.273 |
| chr1:27668482-27668569    | 87  | 4.68  | 0.273 |
| chr8:9383902-9383968      | 66  | 4.65  | 0.273 |
| chr22:29706834-29706916   | 82  | 4.48  | 0.273 |
| chr6:130678469-130678565  | 96  | 5.26  | 0.272 |
| chr12:33059929-33060007   | 78  | 4.39  | 0.272 |
| chr13:21519921-21519955   | 34  | 8.68  | 0.27  |
| chr22:44987350-44987474   | 124 | 6.22  | 0.27  |
| chrY:10008738-10008767    | 29  | 5.87  | 0.27  |
| chr19:17264078-17264173   | 95  | 5.7   | 0.27  |
| chr7:154690187-154690209  | 22  | 4.19  | 0.27  |
| chr12:31951633-31951706   | 73  | 4.07  | 0.27  |
| chr19:2276455-2276542     | 87  | 4.26  | 0.269 |
| chr3:190158577-190158673  | 96  | 7.73  | 0.268 |
| chr20:61337036-61337086   | 50  | 6.89  | 0.268 |
| chr10:14652099-14652158   | 59  | 5.56  | 0.268 |
| chr7:1600390-1600429      | 39  | 5.98  | 0.268 |
| chr20:36759745-36759814   | 69  | 5.07  | 0.268 |
| chr21:38070283-38070395   | 112 | 5.49  | 0.267 |
| chr19:47592385-47592456   | 71  | 4.28  | 0.267 |
| chrX:5847227-5847365      | 138 | 6.21  | 0.267 |
| chr14:101158158-101158252 | 94  | 5.68  | 0.267 |
| chr7:96655723-96655817    | 94  | 5.28  | 0.267 |
| chr9:112935137-112935213  | 76  | 6.71  | 0.266 |
| chr1:201618320-201618399  | 79  | 5.88  | 0.266 |
| chr11:1156458-1156510     | 52  | 5.56  | 0.266 |
| chr2:27350344-27350408    | 64  | 4.58  | 0.265 |
| chr4:102683051-102683139  | 88  | 4.44  | 0.265 |
| chr5:156198337-156198432  | 95  | 5.57  | 0.264 |
| chr15:90191761-90191856   | 95  | 6.79  | 0.264 |
| chr7:63882880-63882931    | 51  | 4.5   | 0.264 |
| chr12:128613838-128613882 | 44  | 4.03  | 0.264 |
| chr8:138323698-138323765  | 67  | 5.48  | 0.264 |
| chr8:11408825-11408882    | 57  | 4.18  | 0.264 |
| chr15:55618829-55618922   | 93  | 10.36 | 0.263 |
| chrX:52897219-52897304    | 85  | 6.6   | 0.263 |
| chr17:77113173-77113249   | 76  | 4.89  | 0.263 |
| chr7:157696689-157696779  | 90  | 4.79  | 0.263 |
| chr10:57946169-57946270   | 101 | 4.7   | 0.263 |
| chr1:1294111-1294205      | 94  | 6.73  | 0.262 |
| chr10:37052567-37052659   | 92  | 6.11  | 0.26  |
| chr21:40760020-40760080   | 60  | 5.55  | 0.26  |
| chr4:132273644-132273725  | 81  | 5.15  | 0.26  |
| chr7:35294461-35294523    | 62  | 4.98  | 0.26  |

|                           |     |       |       |
|---------------------------|-----|-------|-------|
| chr7:101694274-101694399  | 125 | 4.77  | 0.26  |
| chr2:70118973-70119053    | 80  | 4.51  | 0.26  |
| chr9:26604945-26604983    | 38  | 4.29  | 0.26  |
| chr3:13246368-13246430    | 62  | 4.19  | 0.26  |
| chr2:241662006-241662042  | 36  | 4.12  | 0.26  |
| chr2:170105362-170105417  | 55  | 4.09  | 0.26  |
| chr6:28799969-28800093    | 124 | 4.91  | 0.26  |
| chr1:43534118-43534216    | 98  | 10.06 | 0.259 |
| chr17:13018934-13019010   | 76  | 6.91  | 0.259 |
| chr1:12566799-12566897    | 98  | 5.39  | 0.258 |
| chr13:20504999-20505075   | 76  | 4.03  | 0.258 |
| chrX:49368586-49368652    | 66  | 4.72  | 0.258 |
| chr4:151501296-151501379  | 83  | 4.83  | 0.258 |
| chr9:135114362-135114393  | 31  | 4.65  | 0.258 |
| chr12:132164886-132165005 | 119 | 7.36  | 0.257 |
| chr12:131929237-131929353 | 116 | 4.49  | 0.257 |
| chr1:22301168-22301186    | 18  | 5.4   | 0.256 |
| chr2:241405481-241405532  | 51  | 5.34  | 0.256 |
| chr5:65163838-65163892    | 54  | 5.5   | 0.255 |
| chr2:19750689-19750762    | 73  | 4.7   | 0.255 |
| chr2:122496310-122496363  | 53  | 4.22  | 0.255 |
| chr12:130493006-130493078 | 72  | 4.25  | 0.254 |
| chr20:56443396-56443435   | 39  | 4.09  | 0.254 |
| chr21:47407230-47407318   | 88  | 4.53  | 0.253 |
| chr11:22404913-22404989   | 76  | 4.15  | 0.253 |
| chr8:136261831-136261903  | 72  | 4.98  | 0.253 |
| chr15:95399528-95399625   | 97  | 4.51  | 0.253 |
| chr5:151587092-151587168  | 76  | 4.17  | 0.253 |
| chr3:66116551-66116692    | 141 | 6.81  | 0.253 |
| chr3:153224397-153224463  | 66  | 6.02  | 0.253 |
| chr9:135432019-135432058  | 39  | 4.11  | 0.252 |
| chr9:82591894-82591984    | 90  | 4.09  | 0.252 |
| chr7:23065640-23065704    | 64  | 4.1   | 0.252 |
| chr7:128441352-128441527  | 175 | 6.02  | 0.252 |
| chr1:86622240-86622331    | 91  | 6.96  | 0.251 |
| chr11:17627607-17627656   | 49  | 6.22  | 0.251 |
| chr9:8481027-8481110      | 83  | 5.41  | 0.25  |
| chr5:2207882-2207955      | 73  | 6.05  | 0.25  |
| chr8:144963112-144963212  | 100 | 5.25  | 0.25  |
| chr3:170038090-170038146  | 56  | 5.15  | 0.25  |
| chr5:32098080-32098125    | 45  | 4.83  | 0.25  |
| chr11:73480817-73480893   | 76  | 4.37  | 0.25  |
| chr16:2344215-2344273     | 58  | 4.34  | 0.25  |
| chr4:190943147-190943172  | 25  | 4.28  | 0.25  |

|                           |     |      |       |
|---------------------------|-----|------|-------|
| chr4:140693117-140693209  | 92  | 4.19 | 0.25  |
| chr22:25673833-25673880   | 47  | 4.19 | 0.25  |
| chr21:46745329-46745383   | 54  | 4.03 | 0.25  |
| chr8:2933427-2933527      | 100 | 4.55 | 0.249 |
| chr15:98634899-98634962   | 63  | 4.73 | 0.248 |
| chr1:45259906-45259997    | 91  | 5.02 | 0.248 |
| chr7:6166259-6166365      | 106 | 6.71 | 0.247 |
| chr2:39372073-39372152    | 79  | 4.51 | 0.247 |
| chr5:118656667-118656687  | 20  | 4.09 | 0.246 |
| chr22:43829578-43829643   | 65  | 5.33 | 0.246 |
| chr9:33766185-33766219    | 34  | 4.67 | 0.245 |
| chr19:37792521-37792568   | 47  | 6.07 | 0.245 |
| chr7:4352591-4352677      | 86  | 5.01 | 0.245 |
| chr9:44990566-44990627    | 61  | 4.98 | 0.245 |
| chr9:140762178-140762249  | 71  | 4.73 | 0.245 |
| chr10:70511872-70511965   | 93  | 4.62 | 0.245 |
| chr6:5836262-5836326      | 64  | 4.41 | 0.245 |
| chr2:225293088-225293160  | 72  | 7.22 | 0.243 |
| chr20:61897984-61898085   | 101 | 4.75 | 0.243 |
| chr11:1027068-1027095     | 27  | 4.43 | 0.242 |
| chr1:53558445-53558512    | 67  | 4.24 | 0.242 |
| chr8:99371459-99371501    | 42  | 5.07 | 0.242 |
| chr6:393318-393342        | 24  | 4.64 | 0.242 |
| chr7:644301-644368        | 67  | 6.19 | 0.242 |
| chr22:24646897-24646933   | 36  | 4.95 | 0.242 |
| chr11:94609497-94609587   | 90  | 5.45 | 0.242 |
| chr18:20226268-20226296   | 28  | 4.72 | 0.242 |
| chr11:314073-314113       | 40  | 4.16 | 0.242 |
| chr2:201980507-201980583  | 76  | 5.64 | 0.241 |
| chrX:30716675-30716775    | 100 | 5.46 | 0.241 |
| chrX:15286731-15286837    | 106 | 6.18 | 0.24  |
| chr5:483037-483104        | 67  | 4.65 | 0.24  |
| chr11:8887747-8887796     | 49  | 4.39 | 0.24  |
| chr6:26779194-26779266    | 72  | 4.38 | 0.24  |
| chr9:96503672-96503730    | 58  | 6.1  | 0.24  |
| chr11:65374482-65374563   | 81  | 5.87 | 0.24  |
| chr4:29049426-29049496    | 70  | 5.17 | 0.24  |
| chr15:31059076-31059159   | 83  | 4.45 | 0.24  |
| chr11:2907625-2907672     | 47  | 4.35 | 0.24  |
| chr19:3116306-3116384     | 78  | 5.66 | 0.239 |
| chr7:18977938-18978000    | 62  | 5.36 | 0.239 |
| chr6:125965813-125965951  | 138 | 11.3 | 0.239 |
| chr2:121016388-121016475  | 87  | 4.46 | 0.238 |
| chr11:124881292-124881378 | 86  | 4.29 | 0.238 |

|                           |     |       |       |
|---------------------------|-----|-------|-------|
| chr19:3215558-3215604     | 46  | 4.15  | 0.238 |
| chrX:43513182-43513269    | 87  | 6.3   | 0.238 |
| chr18:76266025-76266094   | 69  | 4.48  | 0.238 |
| chr2:78829699-78829788    | 89  | 4.34  | 0.238 |
| chr8:142984451-142984473  | 22  | 4.71  | 0.238 |
| chrX:54409186-54409234    | 48  | 4.12  | 0.238 |
| chr19:55598103-55598182   | 79  | 8.7   | 0.238 |
| chr11:125271699-125271742 | 43  | 4.7   | 0.238 |
| chr7:17377618-17377680    | 62  | 5.46  | 0.237 |
| chr7:1258544-1258581      | 37  | 4.98  | 0.237 |
| chr10:105630607-105630647 | 40  | 4.4   | 0.237 |
| chr22:29704266-29704315   | 49  | 4.33  | 0.237 |
| chr19:3388046-3388140     | 94  | 5.97  | 0.236 |
| chr1:208111424-208111462  | 38  | 5.69  | 0.235 |
| chr1:161992284-161992335  | 51  | 5.16  | 0.235 |
| chr16:78472639-78472725   | 86  | 5.15  | 0.235 |
| chr19:55476638-55476721   | 83  | 8.64  | 0.235 |
| chr2:200329018-200329030  | 12  | 5.01  | 0.235 |
| chr2:159724877-159724922  | 45  | 4.8   | 0.235 |
| chr7:4780511-4780549      | 38  | 4.78  | 0.235 |
| chr12:71770965-71771382   | 417 | 13.07 | 0.235 |
| chr14:83088937-83088960   | 23  | 4.83  | 0.234 |
| chr5:134735636-134735702  | 66  | 4.4   | 0.234 |
| chr6:27729907-27730003    | 96  | 4.59  | 0.233 |
| chr22:22611653-22611749   | 96  | 5.67  | 0.233 |
| chr4:188426754-188426821  | 67  | 4.82  | 0.233 |
| chr11:123193484-123193622 | 138 | 4.6   | 0.233 |
| chr14:44877919-44878015   | 96  | 6.76  | 0.233 |
| chr1:44473759-44473791    | 32  | 4.51  | 0.233 |
| chr12:34402396-34402409   | 13  | 4.31  | 0.233 |
| chr3:44677517-44677578    | 61  | 4.78  | 0.232 |
| chr7:1292064-1292125      | 61  | 5.71  | 0.232 |
| chr12:82339758-82339863   | 105 | 4.39  | 0.232 |
| chr5:140089831-140089965  | 134 | 7.59  | 0.232 |
| chr17:4389757-4389851     | 94  | 4.51  | 0.232 |
| chr7:12051688-12051764    | 76  | 6.57  | 0.231 |
| chrX:153208327-153208443  | 116 | 7.82  | 0.231 |
| chr11:73480654-73480730   | 76  | 5.15  | 0.23  |
| chr2:209242438-209242499  | 61  | 4.72  | 0.23  |
| chr1:190377273-190377364  | 91  | 6.16  | 0.23  |
| chr4:141146052-141146116  | 64  | 6.1   | 0.23  |
| chrX:18229758-18229828    | 70  | 5.56  | 0.23  |
| chr22:39497387-39497487   | 100 | 4.75  | 0.23  |
| chr11:71347030-71347081   | 51  | 4.55  | 0.23  |



|                           |     |       |       |
|---------------------------|-----|-------|-------|
| chr17:76572668-76572723   | 55  | 4.53  | 0.23  |
| chr5:495101-495150        | 49  | 4.21  | 0.23  |
| chr9:136527775-136527868  | 93  | 4.2   | 0.23  |
| chr12:133045471-133045489 | 18  | 4.03  | 0.23  |
| chr5:161049177-161049268  | 91  | 5.4   | 0.229 |
| chr9:124414704-124414782  | 78  | 4.42  | 0.228 |
| chr3:129317964-129318003  | 39  | 6.9   | 0.228 |
| chr11:22811166-22811213   | 47  | 5.31  | 0.228 |
| chrY:7027878-7027942      | 64  | 4.26  | 0.228 |
| chrX:40111212-40111290    | 78  | 5.28  | 0.228 |
| chr15:97814454-97814473   | 19  | 4.45  | 0.228 |
| chr8:74361348-74361368    | 20  | 4.12  | 0.228 |
| chr9:136001916-136002007  | 91  | 4.02  | 0.227 |
| chr5:31317769-31317868    | 99  | 4.36  | 0.227 |
| chr14:103739630-103739765 | 135 | 12.06 | 0.227 |
| chr20:12090253-12090345   | 92  | 10.22 | 0.227 |
| chr12:132918303-132918474 | 171 | 6.48  | 0.226 |
| chr17:14962937-14963013   | 76  | 5.07  | 0.226 |
| chr5:13017807-13017883    | 76  | 5     | 0.226 |
| chr14:104639822-104639890 | 68  | 5.45  | 0.226 |
| chr10:134578028-134578085 | 57  | 5.31  | 0.226 |
| chr19:5238767-5238784     | 17  | 4.64  | 0.226 |
| chr4:182269454-182269502  | 48  | 4.43  | 0.226 |
| chr16:1587319-1587392     | 73  | 4.03  | 0.226 |
| chr1:145464355-145464491  | 136 | 4.55  | 0.225 |
| chr6:33640725-33640774    | 49  | 5.79  | 0.225 |
| chr15:78556977-78557049   | 72  | 5.06  | 0.225 |
| chr16:86547335-86547379   | 44  | 4.65  | 0.225 |
| chr17:7553230-7553306     | 76  | 4.38  | 0.225 |
| chr2:11517266-11517425    | 159 | 7.69  | 0.225 |
| chr4:41397478-41397550    | 72  | 7.58  | 0.224 |
| chr11:23674068-23674101   | 33  | 4.5   | 0.224 |
| chr12:42066665-42066731   | 66  | 4.92  | 0.224 |
| chr1:3041726-3041804      | 78  | 4.2   | 0.224 |
| chr2:52632799-52632857    | 58  | 4.74  | 0.223 |
| chr16:57679686-57679776   | 90  | 4.44  | 0.223 |
| chr14:54413929-54413983   | 54  | 4.79  | 0.223 |
| chr18:33078516-33078608   | 92  | 6.1   | 0.222 |
| chr8:138860765-138860837  | 72  | 5.41  | 0.222 |
| chr16:28892044-28892109   | 65  | 5.21  | 0.222 |
| chr2:107459378-107459432  | 54  | 4.8   | 0.222 |
| chr5:180030621-180030720  | 99  | 5.73  | 0.221 |
| chr15:76632342-76632400   | 58  | 7.35  | 0.221 |
| chr1:2803301-2803461      | 160 | 7.7   | 0.221 |

|                           |     |       |       |
|---------------------------|-----|-------|-------|
| chr4:4871913-4872018      | 105 | 7.62  | 0.221 |
| chr19:42515627-42515699   | 72  | 7.5   | 0.22  |
| chrX:40879406-40879536    | 130 | 5.58  | 0.22  |
| chr11:67748555-67748624   | 69  | 4.69  | 0.22  |
| chr5:148802146-148802234  | 88  | 4.59  | 0.22  |
| chr21:43524016-43524089   | 73  | 4.36  | 0.22  |
| chr12:127574366-127574418 | 52  | 4.05  | 0.22  |
| chr14:93412797-93412820   | 23  | 5.03  | 0.22  |
| chr11:61511240-61511406   | 166 | 4.62  | 0.22  |
| chr18:12494643-12494695   | 52  | 4.49  | 0.22  |
| chr6:65257853-65257903    | 50  | 4.32  | 0.22  |
| chrX:145124034-145124130  | 96  | 5.01  | 0.219 |
| chr10:7472772-7472836     | 64  | 4.68  | 0.219 |
| chr16:3206838-3206901     | 63  | 4.82  | 0.218 |
| chr12:131562055-131562148 | 93  | 4.73  | 0.218 |
| chr18:77254090-77254235   | 145 | 5.95  | 0.218 |
| chr13:90529338-90529356   | 18  | 4.24  | 0.218 |
| chr7:1066633-1066708      | 75  | 4.22  | 0.218 |
| chr7:157868188-157868268  | 80  | 4.11  | 0.218 |
| chr13:68745078-68745203   | 125 | 8.32  | 0.218 |
| chr13:87012876-87012900   | 24  | 4.67  | 0.218 |
| chr1:17092247-17092316    | 69  | 4.63  | 0.217 |
| chr11:1033798-1033875     | 77  | 5.54  | 0.217 |
| chr7:157985784-157985819  | 35  | 5.82  | 0.217 |
| chr17:40125251-40125326   | 75  | 4.66  | 0.217 |
| chrX:99663132-99663180    | 48  | 4.15  | 0.217 |
| chr8:99952869-99952969    | 100 | 7.01  | 0.217 |
| chr13:59187558-59187620   | 62  | 5.03  | 0.216 |
| chr17:73719829-73719932   | 103 | 4.11  | 0.216 |
| chr1:228757953-228757985  | 32  | 4.28  | 0.216 |
| chr17:66961158-66961238   | 80  | 6.49  | 0.216 |
| chr16:1813712-1813809     | 97  | 11.07 | 0.215 |
| chr6:20239411-20239673    | 262 | 6.69  | 0.215 |
| chr1:17811677-17811749    | 72  | 5.12  | 0.215 |
| chr8:2830683-2830794      | 111 | 4.51  | 0.215 |
| chr17:40441393-40441412   | 19  | 4.22  | 0.215 |
| chr17:17625519-17625612   | 93  | 4.19  | 0.215 |
| chr12:110818523-110818575 | 52  | 5.23  | 0.214 |
| chr21:26734382-26734436   | 54  | 4.76  | 0.214 |
| chr4:9523633-9523653      | 20  | 4.55  | 0.214 |
| chr10:22542042-22542121   | 79  | 5.14  | 0.214 |
| chr17:66410099-66410145   | 46  | 4.76  | 0.214 |
| chrX:15167004-15167066    | 62  | 4.74  | 0.214 |
| chr12:22488165-22488230   | 65  | 4.87  | 0.213 |

|                           |     |      |       |
|---------------------------|-----|------|-------|
| chr1:1850129-1850208      | 79  | 4.73 | 0.213 |
| chr9:67927032-67927094    | 62  | 4.31 | 0.213 |
| chr13:114434327-114434394 | 67  | 4.19 | 0.213 |
| chrX:6323634-6323724      | 90  | 4.46 | 0.213 |
| chr3:89113723-89113781    | 58  | 5.39 | 0.213 |
| chr19:40324108-40324224   | 116 | 5.4  | 0.213 |
| chr1:37150355-37150373    | 18  | 5.1  | 0.213 |
| chr12:131707990-131708089 | 99  | 5.86 | 0.212 |
| chr1:36184861-36184894    | 33  | 4.65 | 0.212 |
| chr17:71312305-71312412   | 107 | 6.28 | 0.212 |
| chr10:1506541-1506548     | 7   | 4.39 | 0.212 |
| chrX:145090160-145090248  | 88  | 4.27 | 0.211 |
| chr8:145578247-145578325  | 78  | 4.58 | 0.211 |
| chr5:95515460-95515556    | 96  | 5.47 | 0.211 |
| chr18:11108378-11108442   | 64  | 5.49 | 0.21  |
| chr9:66173517-66173579    | 62  | 4.28 | 0.21  |
| chr4:38228240-38228282    | 42  | 4.27 | 0.21  |
| chr6:170597427-170597494  | 67  | 4.27 | 0.21  |
| chr7:91426866-91426917    | 51  | 4.19 | 0.21  |
| chr5:132324572-132324608  | 36  | 4.14 | 0.21  |
| chr9:140175890-140175984  | 94  | 7.3  | 0.21  |
| chr2:36856390-36856487    | 97  | 6.15 | 0.21  |
| chr16:31053725-31053788   | 63  | 4.83 | 0.21  |
| chr13:102473497-102473550 | 53  | 4.43 | 0.21  |
| chr1:31382930-31383043    | 113 | 9.08 | 0.209 |
| chr2:81421701-81421785    | 84  | 4.98 | 0.209 |
| chr11:61544843-61544927   | 84  | 7.35 | 0.209 |
| chr6:149080749-149080841  | 92  | 5.93 | 0.209 |
| chr10:130255427-130255511 | 84  | 4.81 | 0.209 |
| chr7:70671811-70671887    | 76  | 5.65 | 0.208 |
| chr7:52196418-52196454    | 36  | 4.74 | 0.208 |
| chr7:158766598-158766642  | 44  | 5.95 | 0.208 |
| chr17:47612908-47612970   | 62  | 5.47 | 0.208 |
| chrX:29696618-29696732    | 114 | 4.62 | 0.208 |
| chr14:25899700-25899755   | 55  | 4.16 | 0.208 |
| chr2:69598693-69598765    | 72  | 4.11 | 0.208 |
| chr10:74080850-74080965   | 115 | 4.75 | 0.208 |
| chrX:13796317-13796467    | 150 | 6.61 | 0.208 |
| chrX:47107395-47107492    | 97  | 5.42 | 0.208 |
| chrX:97567639-97567691    | 52  | 4.13 | 0.208 |
| chr19:37774634-37774702   | 68  | 4.13 | 0.208 |
| chr12:99288997-99289032   | 35  | 4.24 | 0.207 |
| chr17:60313796-60313860   | 64  | 4.68 | 0.207 |
| chr7:149112488-149112527  | 39  | 4.16 | 0.207 |

|                           |     |      |       |
|---------------------------|-----|------|-------|
| chr19:17439909-17440001   | 92  | 6.18 | 0.207 |
| chr1:65513345-65513377    | 32  | 4.25 | 0.207 |
| chr4:9073514-9073602      | 88  | 6.83 | 0.207 |
| chr1:92427479-92427559    | 80  | 4.21 | 0.207 |
| chr20:57463946-57464039   | 93  | 6.35 | 0.206 |
| chr11:74594325-74594481   | 156 | 4.91 | 0.206 |
| chr19:554432-554527       | 95  | 6.4  | 0.206 |
| chrY:2649522-2649577      | 55  | 5.11 | 0.206 |
| chr11:2035281-2035355     | 74  | 6.02 | 0.206 |
| chr15:30352072-30352138   | 66  | 4.5  | 0.205 |
| chr1:3028249-3028338      | 89  | 5.11 | 0.205 |
| chr4:187877052-187877147  | 95  | 4.37 | 0.205 |
| chr16:1340835-1340861     | 26  | 4.85 | 0.204 |
| chr4:182208005-182208082  | 77  | 4.81 | 0.204 |
| chr11:2828445-2828474     | 29  | 4.5  | 0.204 |
| chrX:117477028-117477120  | 92  | 6.58 | 0.204 |
| chr14:85819297-85819389   | 92  | 5.08 | 0.204 |
| chr7:23695171-23695347    | 176 | 8.4  | 0.204 |
| chrX:64955208-64955217    | 9   | 6.59 | 0.203 |
| chr6:84521449-84521569    | 120 | 6.09 | 0.203 |
| chr8:23583574-23583625    | 51  | 5.64 | 0.203 |
| chr6:28743691-28743778    | 87  | 5.29 | 0.203 |
| chr6:170598475-170598541  | 66  | 6.64 | 0.203 |
| chrX:28590710-28590806    | 96  | 5.87 | 0.203 |
| chr13:57860712-57860804   | 92  | 5.94 | 0.203 |
| chrX:96568857-96568935    | 78  | 4.63 | 0.203 |
| chr11:9480839-9480921     | 82  | 4.2  | 0.203 |
| chr10:1712844-1712926     | 82  | 6.76 | 0.202 |
| chr16:2533258-2533317     | 59  | 4.45 | 0.202 |
| chr14:104852295-104852383 | 88  | 5.57 | 0.202 |
| chr2:65797307-65797358    | 51  | 5.54 | 0.202 |
| chr9:136101839-136101923  | 84  | 4.69 | 0.202 |
| chr8:120491927-120491967  | 40  | 5.43 | 0.202 |
| chr18:26028085-26028177   | 92  | 7.86 | 0.202 |
| chrX:5965307-5965444      | 137 | 5.97 | 0.202 |
| chr19:684775-684865       | 90  | 4.81 | 0.202 |
| chr16:29244914-29245003   | 89  | 4.69 | 0.202 |
| chr19:16437425-16437594   | 169 | 8.13 | 0.202 |
| chr11:2598680-2598757     | 77  | 5.23 | 0.201 |
| chr15:96884288-96884424   | 136 | 5.58 | 0.201 |
| chr16:29198112-29198253   | 141 | 6.07 | 0.201 |
| chrX:39967641-39967738    | 97  | 5.03 | 0.201 |
| chr19:51189823-51189918   | 95  | 9.16 | 0.2   |
| chrY:10006694-10006786    | 92  | 4.68 | 0.2   |

|                           |     |        |        |
|---------------------------|-----|--------|--------|
| chr5:78417362-78417445    | 83  | 4.54   | 0.2    |
| chr17:78294228-78294246   | 18  | 4.16   | 0.2    |
| chr5:154235830-154235906  | 76  | 5.96   | 0.2    |
| chr1:181287557-181287643  | 86  | 5.18   | 0.2    |
| chr17:87892777-8789366    | 89  | 4.76   | 0.2    |
| chr2:198029067-198029119  | 52  | 4.76   | 0.2    |
| chr5:30139517-30139566    | 49  | 4.27   | 0.2    |
| chr4:8620241-8620264      | 23  | 4.2    | 0.2    |
| chr16:5459875-5459918     | 43  | 4.19   | 0.2    |
| chr19:19253207-19253292   | 85  | 4.02   | 0.2    |
| chr2:861422-861475        | 53  | -4.13  | -0.2   |
| chr1:41284751-41284848    | 97  | -4.17  | -0.2   |
| chr4:1107148-1107171      | 23  | -4.41  | -0.2   |
| chr1:41303972-41304040    | 68  | -4.53  | -0.2   |
| chr16:1601118-1601213     | 95  | -5.26  | -0.2   |
| chr10:127105552-127105579 | 27  | -5.65  | -0.2   |
| chrX:63005039-63005080    | 41  | -6.22  | -0.2   |
| chr6:32029355-32029449    | 94  | -6.87  | -0.2   |
| chr16:15528314-15528364   | 50  | -6.92  | -0.2   |
| chr13:46219491-46219543   | 52  | -7.04  | -0.2   |
| chr10:31989394-31989454   | 60  | -5.85  | -0.2   |
| chr13:98182866-98182952   | 86  | -5.87  | -0.2   |
| chr19:54268584-54268768   | 184 | -10.51 | -0.201 |
| chr15:94218912-94218980   | 68  | -5.83  | -0.201 |
| chr13:33924442-33924575   | 133 | -6.21  | -0.202 |
| chr5:132313454-132313550  | 96  | -4.36  | -0.202 |
| chr1:165495963-165496051  | 88  | -4.78  | -0.202 |
| chr10:37543702-37543826   | 124 | -5.28  | -0.202 |
| chr22:50022155-50022252   | 97  | -5.86  | -0.202 |
| chr7:55811575-55811635    | 60  | -6.04  | -0.202 |
| chr9:98535017-98535168    | 151 | -4.32  | -0.202 |
| chrX:124337874-124337921  | 47  | -6.03  | -0.202 |
| chr19:46156235-46156314   | 79  | -4.56  | -0.202 |
| chr2:220977430-220977523  | 93  | -5.11  | -0.202 |
| chr9:132412323-132412345  | 22  | -4.19  | -0.203 |
| chr1:22377780-22377831    | 51  | -4.3   | -0.203 |
| chr5:2135413-2135494      | 81  | -4.47  | -0.203 |
| chr8:142528623-142528671  | 48  | -5.2   | -0.203 |
| chr14:24641075-24641155   | 80  | -4.08  | -0.203 |
| chr8:91411409-91411503    | 94  | -4.06  | -0.203 |
| chr14:101005199-101005329 | 130 | -5     | -0.204 |
| chr12:124854572-124854653 | 81  | -4.22  | -0.204 |
| chr11:1014972-1015021     | 49  | -4.25  | -0.204 |
| chr20:60781370-60781580   | 210 | -7.86  | -0.204 |

|                           |     |        |        |
|---------------------------|-----|--------|--------|
| chrX:9733705-9733804      | 99  | -4.84  | -0.205 |
| chr11:34405077-34405149   | 72  | -4.43  | -0.205 |
| chr17:61559039-61559136   | 97  | -4.6   | -0.205 |
| chr5:60039636-60039677    | 41  | -4.83  | -0.205 |
| chr22:50702646-50702738   | 92  | -5.02  | -0.205 |
| chr10:72315216-72315237   | 21  | -5.29  | -0.205 |
| chr19:38886529-38886750   | 221 | -12.89 | -0.205 |
| chr10:11207632-11207710   | 78  | -6.97  | -0.205 |
| chr5:175969381-175969447  | 66  | -6.24  | -0.207 |
| chr5:58335590-58335684    | 94  | -4.46  | -0.207 |
| chr16:73100401-73100507   | 106 | -5.2   | -0.207 |
| chr20:31148761-31148849   | 88  | -4.53  | -0.207 |
| chr16:3058107-3058183     | 76  | -5.3   | -0.207 |
| chr12:133480516-133480582 | 66  | -5.64  | -0.207 |
| chr4:63674892-63674950    | 58  | -5.42  | -0.208 |
| chr8:11719452-11719641    | 189 | -6.2   | -0.208 |
| chr12:123754350-123754431 | 81  | -6.89  | -0.208 |
| chr14:86861487-86861553   | 66  | -4.33  | -0.208 |
| chr4:3681902-3682000      | 98  | -4.47  | -0.208 |
| chr8:1693043-1693117      | 74  | -5.03  | -0.208 |
| chr21:46521101-46521157   | 56  | -5.06  | -0.209 |
| chr14:72374990-72375125   | 135 | -5.07  | -0.209 |
| chr16:31226126-31226186   | 60  | -6.15  | -0.209 |
| chr19:57351923-57352012   | 89  | -4.95  | -0.21  |
| chr12:111389282-111389344 | 62  | -5.91  | -0.21  |
| chr9:70645553-70645638    | 85  | -5.43  | -0.21  |
| chr12:133548187-133548236 | 49  | -5.14  | -0.21  |
| chr18:71828962-71829050   | 88  | -5.24  | -0.21  |
| chr11:624177-624202       | 25  | -5.26  | -0.21  |
| chr5:25467186-25467249    | 63  | -5.26  | -0.21  |
| chr2:185560110-185560186  | 76  | -6.78  | -0.211 |
| chr17:33701379-33701476   | 97  | -7.99  | -0.211 |
| chr11:129801553-129801769 | 216 | -8.29  | -0.211 |
| chrX:153037159-153037224  | 65  | -4.3   | -0.212 |
| chr7:149809178-149809261  | 83  | -7.78  | -0.212 |
| chr11:62166120-62166172   | 52  | -9.09  | -0.212 |
| chr21:45930741-45930767   | 26  | -6.61  | -0.212 |
| chr4:63151845-63151904    | 59  | -4.25  | -0.212 |
| chr22:49944536-49944628   | 92  | -4.39  | -0.212 |
| chr9:100690507-100690559  | 52  | -4.63  | -0.212 |
| chr7:4855803-4855892      | 89  | -5.14  | -0.212 |
| chr10:132099227-132099327 | 100 | -6.38  | -0.212 |
| chr5:153858684-153858921  | 237 | -9.62  | -0.212 |
| chr4:8859938-8860023      | 85  | -7.01  | -0.212 |

|                           |     |        |        |
|---------------------------|-----|--------|--------|
| chr1:232760958-232761044  | 86  | -4.64  | -0.212 |
| chr9:116889160-116889171  | 11  | -5.59  | -0.212 |
| chr16:15528767-15528779   | 12  | -4.62  | -0.213 |
| chr19:1806747-1806812     | 65  | -5.34  | -0.213 |
| chr13:113529575-113529666 | 91  | -4.09  | -0.213 |
| chrY:15863080-15863135    | 55  | -8.31  | -0.213 |
| chr12:30976188-30976350   | 162 | -11.48 | -0.214 |
| chr21:27449127-27449195   | 68  | -4.45  | -0.214 |
| chrX:135528387-135528424  | 37  | -4.52  | -0.214 |
| chr11:68452593-68452622   | 29  | -9.43  | -0.214 |
| chr5:140871676-140871757  | 81  | -4.04  | -0.215 |
| chr5:2053011-2053049      | 38  | -4.23  | -0.215 |
| chr2:1603195-1603242      | 47  | -4.28  | -0.215 |
| chr14:27104337-27104361   | 24  | -5.96  | -0.215 |
| chr4:147560391-147560490  | 99  | -7.98  | -0.215 |
| chr7:100235685-100235712  | 27  | -4.93  | -0.216 |
| chr16:86734133-86734224   | 91  | -6.73  | -0.216 |
| chr1:192875107-192875160  | 53  | -5.03  | -0.216 |
| chr7:76760074-76760149    | 75  | -5.11  | -0.216 |
| chr6:138276953-138277009  | 56  | -8.41  | -0.216 |
| chr2:58484404-58484476    | 72  | -7.82  | -0.216 |
| chr1:200983312-200983361  | 49  | -4.3   | -0.217 |
| chrX:51075401-51075545    | 144 | -7.17  | -0.217 |
| chr19:55908809-55908841   | 32  | -4.27  | -0.217 |
| chr19:281381-281445       | 64  | -4.92  | -0.217 |
| chr7:155247520-155247553  | 33  | -5.28  | -0.217 |
| chr22:49270939-49271019   | 80  | -4.12  | -0.218 |
| chr5:180486420-180486597  | 177 | -10.42 | -0.218 |
| chr11:850763-850833       | 70  | -4.88  | -0.218 |
| chr1:228103683-228103782  | 99  | -4.34  | -0.218 |
| chr10:77165442-77165512   | 70  | -4.42  | -0.218 |
| chr19:33557541-33557728   | 187 | -6.59  | -0.219 |
| chrX:138774238-138774307  | 69  | -5.35  | -0.219 |
| chr12:3181005-3181126     | 121 | -7.88  | -0.219 |
| chr20:3052738-3052864     | 126 | -10.32 | -0.22  |
| chr6:19734653-19734711    | 58  | -4.07  | -0.22  |
| chr1:106431886-106431953  | 67  | -5.14  | -0.22  |
| chr22:18961795-18961811   | 16  | -4.45  | -0.22  |
| chr10:99108945-99109105   | 160 | -5.46  | -0.22  |
| chr7:157234762-157234783  | 21  | -4.06  | -0.22  |
| chrY:28614200-28614279    | 79  | -4.24  | -0.22  |
| chr16:85179448-85179478   | 30  | -4.28  | -0.22  |
| chr9:92989603-92989619    | 16  | -4.67  | -0.22  |
| chr14:101923129-101923181 | 52  | -4.71  | -0.22  |

|                           |     |        |        |
|---------------------------|-----|--------|--------|
| chr17:7758220-7758291     | 71  | -4.8   | -0.22  |
| chr12:2113365-2113453     | 88  | -7.07  | -0.22  |
| chr6:77586619-77586690    | 71  | -6.18  | -0.22  |
| chr3:197282714-197282828  | 114 | -4.73  | -0.221 |
| chr11:60620383-60620478   | 95  | -7.75  | -0.221 |
| chr7:27032204-27032301    | 97  | -5.84  | -0.221 |
| chr3:175505155-175505320  | 165 | -11.09 | -0.221 |
| chr20:3052975-3053039     | 64  | -4.58  | -0.221 |
| chr1:188727208-188727289  | 81  | -5.41  | -0.221 |
| chr2:16348012-16348092    | 80  | -4.93  | -0.222 |
| chr4:14016802-14016878    | 76  | -7.24  | -0.222 |
| chr1:17198591-17198677    | 86  | -6.38  | -0.222 |
| chr1:248335584-248335789  | 205 | -6.35  | -0.222 |
| chr7:612692-612782        | 90  | -6.21  | -0.222 |
| chr19:33004238-33004290   | 52  | -4.04  | -0.223 |
| chr10:125804007-125804108 | 101 | -5.7   | -0.223 |
| chr4:491392-491459        | 67  | -6.25  | -0.223 |
| chr4:1396541-1396588      | 47  | -6.05  | -0.223 |
| chr1:45279458-45279550    | 92  | -8.25  | -0.224 |
| chr16:54318143-54318275   | 132 | -4.67  | -0.224 |
| chrX:37291580-37291619    | 39  | -4.05  | -0.224 |
| chr8:143499565-143499639  | 74  | -5.12  | -0.224 |
| chr8:143240188-143240201  | 13  | -5.02  | -0.225 |
| chr1:20512874-20512987    | 113 | -6.54  | -0.225 |
| chr11:119562653-119562681 | 28  | -4.65  | -0.225 |
| chr6:127796586-127796680  | 94  | -4.89  | -0.226 |
| chr12:30975738-30976085   | 347 | -12.93 | -0.226 |
| chr6:41438536-41438593    | 57  | -5.21  | -0.226 |
| chr4:72198369-72198445    | 76  | -5.51  | -0.227 |
| chr6:87923068-87923116    | 48  | -4.06  | -0.227 |
| chrY:23838533-23838669    | 136 | -4.58  | -0.227 |
| chr2:203737271-203737298  | 27  | -4.64  | -0.227 |
| chr2:142022588-142022624  | 36  | -4.2   | -0.228 |
| chr1:109629182-109629232  | 50  | -4.59  | -0.228 |
| chr4:77723332-77723406    | 74  | -4.66  | -0.228 |
| chrY:21729484-21729540    | 56  | -5.07  | -0.228 |
| chr1:228751649-228751696  | 47  | -5.68  | -0.229 |
| chr15:69325347-69325430   | 83  | -5.05  | -0.229 |
| chr11:117059390-117059456 | 66  | -4.29  | -0.23  |
| chr4:41749646-41749684    | 38  | -4.61  | -0.23  |
| chr5:1431486-1431556      | 70  | -4.7   | -0.23  |
| chr16:84065042-84065100   | 58  | -4.73  | -0.23  |
| chr1:6143144-6143199      | 55  | -6.06  | -0.23  |
| chr13:28491523-28491623   | 100 | -4.03  | -0.23  |



|                           |     |        |        |
|---------------------------|-----|--------|--------|
| chr3:39335470-39335558    | 88  | -4.3   | -0.23  |
| chr8:4248194-4248359      | 165 | -6.85  | -0.23  |
| chr4:66137324-66137397    | 73  | -9.01  | -0.231 |
| chr19:391741-391955       | 214 | -5.05  | -0.231 |
| chr1:154274950-154275027  | 77  | -6.02  | -0.231 |
| chr5:169660529-169660591  | 62  | -4.83  | -0.232 |
| chr14:23276342-23276403   | 61  | -7     | -0.232 |
| chr12:121960240-121960312 | 72  | -6.47  | -0.232 |
| chr21:43743269-43743321   | 52  | -5.58  | -0.232 |
| chr1:8148828-8148875      | 47  | -4.46  | -0.232 |
| chr1:163662359-163662364  | 5   | -4.02  | -0.233 |
| chrX:107681452-107681477  | 25  | -5.11  | -0.233 |
| chr5:179172893-179172975  | 82  | -5.84  | -0.233 |
| chr22:46002085-46002177   | 92  | -4.15  | -0.233 |
| chr1:91183993-91184027    | 34  | -4.45  | -0.233 |
| chr7:39649452-39649531    | 79  | -8.01  | -0.234 |
| chr3:29524357-29524418    | 61  | -7.08  | -0.234 |
| chr11:109293118-109293216 | 98  | -6.56  | -0.234 |
| chr5:111093473-111093564  | 91  | -8.87  | -0.234 |
| chr14:75447598-75447650   | 52  | -5.2   | -0.234 |
| chr11:28920428-28920469   | 41  | -4.27  | -0.235 |
| chr16:882434-882507       | 73  | -4.35  | -0.235 |
| chr3:126135026-126135111  | 85  | -4.92  | -0.236 |
| chr10:55458781-55458824   | 43  | -4.51  | -0.237 |
| chr22:20480487-20480571   | 84  | -4.78  | -0.237 |
| chr9:139659037-139659080  | 43  | -6.15  | -0.237 |
| chr14:43051061-43051108   | 47  | -4.48  | -0.238 |
| chr19:13030772-13030855   | 83  | -4.55  | -0.238 |
| chr17:81048428-81048510   | 82  | -4.91  | -0.238 |
| chr21:46976248-46976311   | 63  | -4.89  | -0.238 |
| chr9:74774939-74775011    | 72  | -4.28  | -0.238 |
| chr7:24324964-24325060    | 96  | -4.95  | -0.239 |
| chr3:5372838-5372982      | 144 | -4.87  | -0.24  |
| chr8:6117759-6117851      | 92  | -4.22  | -0.24  |
| chr9:133815471-133815543  | 72  | -4.66  | -0.24  |
| chrX:89367675-89367745    | 70  | -4.27  | -0.24  |
| chr7:45604270-45604384    | 114 | -6.42  | -0.24  |
| chr5:150284398-150284448  | 50  | -5.46  | -0.241 |
| chr21:46975624-46975926   | 302 | -10.63 | -0.241 |
| chr2:242491493-242491580  | 87  | -7.55  | -0.241 |
| chr12:117593384-117593469 | 85  | -5.46  | -0.242 |
| chr5:17141111-17141210    | 99  | -5.7   | -0.242 |
| chr7:1689011-1689094      | 83  | -5.3   | -0.242 |
| chr8:4256117-4256213      | 96  | -5.31  | -0.242 |

|                           |     |        |        |
|---------------------------|-----|--------|--------|
| chr19:717729-717808       | 79  | -4.37  | -0.242 |
| chr6:99279482-99279539    | 57  | -4.48  | -0.242 |
| chrY:23111560-23111693    | 133 | -5.62  | -0.243 |
| chr10:38645319-38645379   | 60  | -4.24  | -0.243 |
| chr22:46326629-46327322   | 693 | -13.14 | -0.243 |
| chr11:2466887-2466928     | 41  | -4.72  | -0.243 |
| chr19:1192542-1192615     | 73  | -5.45  | -0.243 |
| chr1:228746086-228746172  | 86  | -5.24  | -0.243 |
| chr10:17774366-17774422   | 56  | -5.08  | -0.244 |
| chr14:30833046-30833120   | 74  | -4.5   | -0.244 |
| chr3:195916387-195916427  | 40  | -4.79  | -0.245 |
| chr17:79889176-79889213   | 37  | -4.89  | -0.245 |
| chr6:36635067-36635099    | 32  | -5.01  | -0.245 |
| chr22:43582212-43582291   | 79  | -5.26  | -0.245 |
| chr12:123932661-123932733 | 72  | -6.52  | -0.245 |
| chrX:77034078-77034132    | 54  | -4.19  | -0.245 |
| chr6:1245153-1245248      | 95  | -5.97  | -0.246 |
| chr5:139693982-139694062  | 80  | -4.06  | -0.246 |
| chr1:228633828-228633921  | 93  | -6     | -0.246 |
| chr16:779309-779388       | 79  | -7.81  | -0.246 |
| chr9:72425288-72425424    | 136 | -8.15  | -0.247 |
| chr3:145726253-145726470  | 217 | -6.35  | -0.247 |
| chr2:3750859-3750952      | 93  | -4.1   | -0.247 |
| chr5:1269363-1269443      | 80  | -4.35  | -0.247 |
| chr17:81049156-81049242   | 86  | -4.79  | -0.247 |
| chr4:151504163-151504262  | 99  | -5.94  | -0.247 |
| chr16:79381220-79381308   | 88  | -4.06  | -0.248 |
| chr4:8930450-8930537      | 87  | -4.73  | -0.248 |
| chr2:20869290-20869366    | 76  | -4.79  | -0.248 |
| chr7:155260316-155260352  | 36  | -4.66  | -0.248 |
| chr8:145024948-145025047  | 99  | -5.53  | -0.249 |
| chr11:116450951-116451008 | 57  | -4.84  | -0.249 |
| chr15:93616378-93616519   | 141 | -10.19 | -0.249 |
| chrX:66765349-66765409    | 60  | -6     | -0.25  |
| chrY:13462859-13462941    | 82  | -4.05  | -0.25  |
| chr12:55561294-55561364   | 70  | -4.23  | -0.25  |
| chr15:78497027-78497086   | 59  | -5.89  | -0.25  |
| chr1:228778604-228778640  | 36  | -6.54  | -0.25  |
| chr18:76496425-76496510   | 85  | -4.76  | -0.251 |
| chr7:150706001-150706066  | 65  | -5.43  | -0.251 |
| chr7:15587159-15587230    | 71  | -4.56  | -0.252 |
| chr17:48546288-48546386   | 98  | -7.64  | -0.252 |
| chr6:16220517-16220617    | 100 | -4.48  | -0.252 |
| chr14:101924351-101924420 | 69  | -7.46  | -0.252 |

|                           |     |       |        |
|---------------------------|-----|-------|--------|
| chr7:582875-582976        | 101 | -4.65 | -0.253 |
| chr5:126070165-126070224  | 59  | -7.33 | -0.253 |
| chr7:156798174-156798258  | 84  | -6.08 | -0.254 |
| chr21:33449249-33449339   | 90  | -6.17 | -0.254 |
| chr19:10519952-10520044   | 92  | -4.14 | -0.254 |
| chr7:149463166-149463263  | 97  | -6.58 | -0.254 |
| chr11:92870054-92870110   | 56  | -4.25 | -0.255 |
| chr17:3491821-3491873     | 52  | -4.33 | -0.255 |
| chr14:77160619-77160680   | 61  | -4.54 | -0.255 |
| chr10:1994551-1994581     | 30  | -4.81 | -0.255 |
| chrX:96567901-96567959    | 58  | -4.83 | -0.255 |
| chr2:125398095-125398134  | 39  | -5.41 | -0.255 |
| chr3:185912389-185912478  | 89  | -5.61 | -0.255 |
| chr6:169192593-169192649  | 56  | -6.12 | -0.255 |
| chr9:136595200-136595252  | 52  | -4.08 | -0.256 |
| chr19:1254103-1254152     | 49  | -5.16 | -0.256 |
| chr17:77142184-77142218   | 34  | -4.3  | -0.256 |
| chr13:50266163-50266422   | 259 | -8.01 | -0.256 |
| chr18:55020698-55020833   | 135 | -8.22 | -0.257 |
| chr16:58787854-58787932   | 78  | -4.17 | -0.257 |
| chr3:2526825-2526898      | 73  | -4.98 | -0.258 |
| chr9:75456665-75456706    | 41  | -5.85 | -0.258 |
| chr19:18854194-18854291   | 97  | -6.85 | -0.258 |
| chr4:48908539-48908627    | 88  | -7.76 | -0.258 |
| chr3:183535072-183535161  | 89  | -4.58 | -0.258 |
| chr14:42748710-42748785   | 75  | -4.54 | -0.26  |
| chrX:79470409-79470455    | 46  | -4.35 | -0.26  |
| chr14:93398926-93398976   | 50  | -4.37 | -0.26  |
| chr6:168613155-168613232  | 77  | -4.5  | -0.26  |
| chr5:38729614-38729648    | 34  | -4.76 | -0.26  |
| chr5:139537280-139537317  | 37  | -4.86 | -0.26  |
| chr7:644981-645070        | 89  | -4.92 | -0.26  |
| chr20:61838743-61838775   | 32  | -7.04 | -0.26  |
| chr7:705717-705805        | 88  | -7.49 | -0.26  |
| chr1:245628348-245628575  | 227 | -9.32 | -0.262 |
| chr13:100649599-100649673 | 74  | -5.4  | -0.262 |
| chr4:940910-940983        | 73  | -4.59 | -0.262 |
| chr4:112816206-112816250  | 44  | -4.76 | -0.263 |
| chr3:75174661-75174705    | 44  | -5.27 | -0.263 |
| chr5:134366917-134367001  | 84  | -6.36 | -0.263 |
| chr9:108896823-108896882  | 59  | -4.7  | -0.263 |
| chr15:40893948-40894020   | 72  | -5.14 | -0.263 |
| chrX:14017635-14017691    | 56  | -4.59 | -0.263 |
| chr16:84911700-84911746   | 46  | -4.48 | -0.265 |

|                           |     |       |        |
|---------------------------|-----|-------|--------|
| chr2:56420169-56420277    | 108 | -5.96 | -0.266 |
| chr17:161425-161487       | 62  | -5.39 | -0.267 |
| chr19:17579484-17579505   | 21  | -4.17 | -0.268 |
| chr7:66961051-66961091    | 40  | -4.92 | -0.268 |
| chr13:114805144-114805227 | 83  | -5.06 | -0.268 |
| chr19:33168586-33168644   | 58  | -5.59 | -0.268 |
| chr3:139104079-139104175  | 96  | -5.79 | -0.269 |
| chr4:7710135-7710204      | 69  | -4.55 | -0.27  |
| chr4:8867541-8867604      | 63  | -4.03 | -0.27  |
| chr17:2747288-2747383     | 95  | -4.7  | -0.27  |
| chr19:37778388-37778483   | 95  | -7.44 | -0.27  |
| chr15:41794830-41795002   | 172 | -5.07 | -0.271 |
| chr2:73520378-73520454    | 76  | -5.94 | -0.271 |
| chr1:2224240-2224324      | 84  | -4.79 | -0.272 |
| chr4:5894126-5894208      | 82  | -6.41 | -0.272 |
| chr5:114937981-114938092  | 111 | -8.24 | -0.272 |
| chr15:25161254-25161311   | 57  | -5.18 | -0.273 |
| chr20:44686421-44686428   | 7   | -4.12 | -0.274 |
| chr4:1757205-1757253      | 48  | -5.48 | -0.274 |
| chr5:154070593-154070679  | 86  | -7.78 | -0.275 |
| chr3:195450951-195451006  | 55  | -4.01 | -0.275 |
| chr8:145638224-145638254  | 30  | -4.22 | -0.275 |
| chr12:3112800-3112821     | 21  | -4.36 | -0.275 |
| chr18:77659257-77659329   | 72  | -5.15 | -0.275 |
| chr19:52206289-52206369   | 80  | -6.04 | -0.276 |
| chr7:101632519-101632618  | 99  | -9.1  | -0.276 |
| chr13:55216462-55216493   | 31  | -7.05 | -0.277 |
| chr18:12247403-12247456   | 53  | -7.06 | -0.277 |
| chr18:27755745-27755789   | 44  | -4.98 | -0.278 |
| chr1:181287339-181287407  | 68  | -7.32 | -0.279 |
| chr16:1266490-1266552     | 62  | -4.34 | -0.28  |
| chr11:78615259-78615336   | 77  | -5.12 | -0.28  |
| chr16:89881910-89882056   | 146 | -4.27 | -0.28  |
| chr18:55289962-55290063   | 101 | -5.35 | -0.28  |
| chr21:44076426-44076556   | 130 | -4.35 | -0.281 |
| chr13:112685907-112685953 | 46  | -4.09 | -0.282 |
| chr1:6311474-6311563      | 89  | -4.74 | -0.282 |
| chrY:24513255-24513485    | 230 | -7.84 | -0.282 |
| chr2:1480965-1481013      | 48  | -5.04 | -0.283 |
| chr10:45923270-45923369   | 99  | -5.39 | -0.284 |
| chrX:97635479-97635521    | 42  | -7.43 | -0.285 |
| chr17:58087490-58087527   | 37  | -4.07 | -0.285 |
| chr14:105944277-105944310 | 33  | -4.12 | -0.285 |
| chr1:117170223-117170280  | 57  | -5.96 | -0.285 |

|                           |     |       |        |
|---------------------------|-----|-------|--------|
| chr11:133799539-133799648 | 109 | -6.02 | -0.285 |
| chr6:147809185-147809236  | 51  | -4.67 | -0.286 |
| chr12:30948635-30948664   | 29  | -4.84 | -0.286 |
| chr20:23589052-23589096   | 44  | -4.07 | -0.287 |
| chr19:835517-835599       | 82  | -4.22 | -0.288 |
| chr13:112758835-112758897 | 62  | -8    | -0.288 |
| chr17:76305103-76305186   | 83  | -5    | -0.288 |
| chrY:7428178-7428241      | 63  | -6.77 | -0.288 |
| chr5:63013027-63013089    | 62  | -4.22 | -0.288 |
| chr7:158937634-158937696  | 62  | -4.8  | -0.288 |
| chr22:49136339-49136392   | 53  | -5.21 | -0.288 |
| chr5:103073974-103074036  | 62  | -5.31 | -0.291 |
| chr13:100227397-100227475 | 78  | -5.31 | -0.292 |
| chr4:1512874-1512902      | 28  | -6.03 | -0.292 |
| chr18:60263380-60263463   | 83  | -5.69 | -0.293 |
| chr1:1962485-1962535      | 50  | -4.77 | -0.295 |
| chr17:29239085-29239164   | 79  | -7.52 | -0.296 |
| chr14:32096704-32096780   | 76  | -5.07 | -0.296 |
| chr17:74823878-74823941   | 63  | -4.32 | -0.297 |
| chr7:71203401-71203434    | 33  | -4.48 | -0.297 |
| chr13:76869309-76869321   | 12  | -4.34 | -0.297 |
| chr6:28983065-28983078    | 13  | -4.62 | -0.3   |
| chr4:380169-380221        | 52  | -4.74 | -0.3   |
| chr10:29773469-29773567   | 98  | -4.74 | -0.3   |
| chr8:10456561-10456598    | 37  | -6.02 | -0.302 |
| chr22:50002508-50002592   | 84  | -5.76 | -0.303 |
| chr6:42695165-42695256    | 91  | -5.24 | -0.303 |
| chr7:4873680-4873776      | 96  | -6.07 | -0.304 |
| chr2:2871380-2871441      | 61  | -4.25 | -0.305 |
| chr18:77905350-77905449   | 99  | -8.77 | -0.305 |
| chr2:26951299-26951378    | 79  | -7.12 | -0.306 |
| chr8:16527728-16527860    | 132 | -7.41 | -0.308 |
| chr1:228778428-228778506  | 78  | -7.63 | -0.309 |
| chr3:127634117-127634202  | 85  | -8.22 | -0.309 |
| chr2:142042751-142042818  | 67  | -4.13 | -0.31  |
| chr2:203941854-203941953  | 99  | -4.38 | -0.31  |
| chr18:11533100-11533195   | 95  | -6.44 | -0.31  |
| chr22:32602890-32602936   | 46  | -4.77 | -0.312 |
| chr10:134811814-134811889 | 75  | -5.79 | -0.312 |
| chr4:15843438-15843476    | 38  | -4.07 | -0.312 |
| chr3:155818293-155818354  | 61  | -4.66 | -0.312 |
| chr9:95546743-95546877    | 134 | -6.63 | -0.313 |
| chrX:128978174-128978208  | 34  | -8.95 | -0.313 |
| chr16:67851090-67851139   | 49  | -5.37 | -0.314 |

|                           |     |        |        |
|---------------------------|-----|--------|--------|
| chr18:73168163-73168198   | 35  | -4.64  | -0.314 |
| chr22:24255888-24256353   | 465 | -11.76 | -0.314 |
| chr1:228747128-228747201  | 73  | -4.68  | -0.317 |
| chr7:139004713-139004776  | 63  | -4.2   | -0.318 |
| chr2:14112581-14112633    | 52  | -4.52  | -0.318 |
| chr1:63787046-63787095    | 49  | -5.48  | -0.319 |
| chr16:2229009-2229109     | 100 | -8.99  | -0.319 |
| chr2:107084596-107084610  | 14  | -4.06  | -0.32  |
| chr4:9260194-9260249      | 55  | -4.07  | -0.32  |
| chr19:7747070-7747158     | 88  | -5.94  | -0.322 |
| chr18:76583074-76583159   | 85  | -5.07  | -0.323 |
| chr10:35928870-35928941   | 71  | -5.74  | -0.324 |
| chr11:122277859-122277908 | 49  | -4.59  | -0.325 |
| chr10:670813-670876       | 63  | -7.03  | -0.326 |
| chr10:115860524-115860607 | 83  | -5.19  | -0.328 |
| chr1:957845-957924        | 79  | -5.3   | -0.33  |
| chr10:55064010-55064171   | 161 | -5.14  | -0.334 |
| chr7:16256153-16256217    | 64  | -4.95  | -0.336 |
| chrX:3234284-3234350      | 66  | -5.39  | -0.336 |
| chr11:2929471-2929544     | 73  | -4.45  | -0.338 |
| chr21:45903366-45903463   | 97  | -5.41  | -0.339 |
| chr11:15095459-15095530   | 71  | -6.02  | -0.342 |
| chr4:6010142-6010234      | 92  | -7.42  | -0.343 |
| chr11:68622202-68622275   | 73  | -5.93  | -0.344 |
| chr5:38466908-38467001    | 93  | -5.33  | -0.345 |
| chr17:19250049-19250148   | 99  | -5.51  | -0.345 |
| chr2:102247438-102247511  | 73  | -5.21  | -0.346 |
| chr5:2169981-2170036      | 55  | -4.84  | -0.346 |
| chr6:45608689-45608794    | 105 | -4.06  | -0.347 |
| chr22:24655123-24655186   | 63  | -5.67  | -0.348 |
| chr12:38551155-38551219   | 64  | -5.47  | -0.349 |
| chr1:48058984-48059020    | 36  | -5.98  | -0.352 |
| chr4:3776913-3776933      | 20  | -5.9   | -0.353 |
| chr19:49878080-49878142   | 62  | -4.11  | -0.354 |
| chr5:133818283-133818420  | 137 | -8.49  | -0.355 |
| chr5:124700420-124700512  | 92  | -7.17  | -0.357 |
| chr2:239013314-239013402  | 88  | -4.78  | -0.358 |
| chr12:111618923-111618938 | 15  | -5.3   | -0.358 |
| chrX:100914569-100914642  | 73  | -4.13  | -0.36  |
| chr17:56582885-56582981   | 96  | -4.41  | -0.36  |
| chr16:25717460-25717524   | 64  | -5.66  | -0.36  |
| chr9:73283406-73283474    | 68  | -6.41  | -0.361 |
| chr8:50482399-50482459    | 60  | -4.89  | -0.362 |
| chr10:18587220-18587255   | 35  | -5.16  | -0.363 |

|                           |     |        |        |
|---------------------------|-----|--------|--------|
| chr2:130189230-130189311  | 81  | -5.47  | -0.364 |
| chr20:44513159-44513252   | 93  | -6.2   | -0.367 |
| chr11:11054422-11054449   | 27  | -4.42  | -0.368 |
| chr8:53852566-53852638    | 72  | -5.43  | -0.369 |
| chr4:127121663-127121685  | 22  | -4.57  | -0.37  |
| chr4:190905498-190905531  | 33  | -4.95  | -0.37  |
| chr10:112527533-112527585 | 52  | -4.89  | -0.372 |
| chr19:37775646-37775736   | 90  | -5.22  | -0.373 |
| chr20:62406572-62406668   | 96  | -5.27  | -0.373 |
| chr17:79400998-79401032   | 34  | -4.43  | -0.374 |
| chr17:5019501-5019563     | 62  | -6.92  | -0.375 |
| chr13:50914873-50914973   | 100 | -4.4   | -0.376 |
| chr6:160582506-160582548  | 42  | -4.88  | -0.377 |
| chr17:59532041-59532204   | 163 | -9.7   | -0.381 |
| chr22:21200265-21200316   | 51  | -4.87  | -0.382 |
| chr9:137830921-137830980  | 59  | -4.8   | -0.383 |
| chr19:5891226-5891234     | 8   | -4.19  | -0.385 |
| chr19:39899218-39899299   | 81  | -5.79  | -0.388 |
| chr17:65332320-65332390   | 70  | -4.3   | -0.39  |
| chr5:55931871-55931913    | 42  | -4.8   | -0.39  |
| chr22:24641653-24641778   | 125 | -5.1   | -0.39  |
| chr22:41056546-41056579   | 33  | -5.24  | -0.395 |
| chr5:155107503-155107538  | 35  | -7.15  | -0.396 |
| chr2:227926814-227926860  | 46  | -4.58  | -0.4   |
| chr3:142666211-142666362  | 151 | -10.02 | -0.405 |
| chr1:10700012-10700097    | 85  | -10.91 | -0.407 |
| chr17:72246229-72246294   | 65  | -5.09  | -0.407 |
| chr1:110230044-110230103  | 59  | -4.06  | -0.408 |
| chr1:106926074-106926108  | 34  | -5.26  | -0.415 |
| chr4:7647755-7647793      | 38  | -4.21  | -0.417 |
| chrX:33619994-33620072    | 78  | -4.02  | -0.418 |
| chr4:58038971-58039049    | 78  | -5.86  | -0.42  |
| chr13:47734954-47735053   | 99  | -5.31  | -0.425 |
| chr6:170055223-170055317  | 94  | -8.66  | -0.426 |
| chr4:157288520-157288601  | 81  | -8.72  | -0.426 |
| chr4:187884196-187884290  | 94  | -4.78  | -0.429 |
| chr7:104988939-104989031  | 92  | -6.59  | -0.432 |
| chr17:12358955-12359019   | 64  | -5.45  | -0.433 |
| chr20:36050097-36050140   | 43  | -4.19  | -0.436 |
| chr12:53302031-53302096   | 65  | -4.01  | -0.438 |
| chr11:68811737-68811759   | 22  | -6.29  | -0.443 |
| chr2:114859659-114859725  | 66  | -5.69  | -0.444 |
| chr8:143020765-143020830  | 65  | -5.12  | -0.45  |
| chr9:135998620-135998721  | 101 | -7.01  | -0.47  |

|                           |    |        |        |
|---------------------------|----|--------|--------|
| chr3:192127390-192127480  | 90 | -14.37 | -0.481 |
| chr4:184430838-184430935  | 97 | -6.9   | -0.49  |
| chr7:4872426-4872507      | 81 | -9.74  | -0.53  |
| chr14:104556868-104556890 | 22 | -4.89  | -0.557 |
| chr6:76261957-76261991    | 34 | -7.39  | -0.676 |



## Associated\_gene(s)

ARRDC2(pmt,NM\_001025604),

ZNF442(pmt,NM\_030824),  
JAKMIP3(NM\_001105521),  
CHADL(NM\_138481),  
CD28(NM\_001243078),CD28(NM\_006139),CD28(NM\_001243077),  
MIR5009(NR\_049807),

EPHA4(NM\_004438),  
NCOR2(NM\_001077261),NCOR2(NM\_001206654),NCOR2(NM\_006312),  
TSNARE1(NM\_145003),  
CASC5(NM\_144508),CASC5(NM\_170589),

STX12(NM\_177424),  
KIF26B(NM\_018012),

RNF217(NM\_001286398),STL(pmt,NR\_026876),  
ESRRG(NM\_001134285),ESRRG(NM\_001243509),ESRRG(NM\_206595),ESRRG(NM\_001243506),I

ARID5B(NM\_032199),  
HOOK2(NM\_001100176),HOOK2(NM\_013312),  
GALNT13(NM\_052917),  
AZU1(NM\_001700),

ASNA1(NM\_004317),  
SLC10A7(NM\_001029998),  
BCAR3(NM\_001261408),

BLOC1S5-TXNDC5(NR\_037616),BLOC1S5(NM\_201280),EEF1E1-BLOC1S5(NR\_037618),BLOC1S5(I  
PCSK1N(pmt,NM\_013271),

GPR1-AS(NR\_104359),GPR1(NM\_001261452),GPR1(NM\_001098199),GPR1(NM\_001261453),GF  
DHRS4L2(NM\_198083),DHRS4L2(NM\_001193636),DHRS4L2(NM\_001193637),DHRS4L2(NM\_001  
GOLGA8K(pmt,NM\_001282493),  
KCNAB2(NM\_001199860),KCNAB2(NM\_003636),KCNAB2(NM\_172130),KCNAB2(NM\_00119986  
ANKRD11(NR\_045839),ANKRD11(NM\_013275),ANKRD11(NM\_001256183),ANKRD11(NM\_0012  
RHPN1(NM\_052924),RHPN1-AS1(pmt,NR\_026785),

IL3RA(NM\_002183),IL3RA(NM\_001267713),  
MARCH1(NM\_001166373),  
KCNQ1(NM\_181798),KCNQ1(NM\_000218),  
QPRT(NM\_014298),

CCDC6(NM\_005436),

NRG3(NM\_001165973),NRG3(NM\_001165972),NRG3(NM\_001010848),

NFATC1(NM\_172388),NFATC1(NM\_172390),NFATC1(NM\_006162),NFATC1(NM\_172389),NFATC  
MYCBPAP(pmt,NM\_032133),

CACNA1H(NM\_021098),CACNA1H(NM\_001005407),

IL10(NM\_000572),

SRSF1(pmt,NR\_034041),SRSF1(pmt,NM\_006924),SRSF1(pmt,NM\_001078166),  
OPHN1(NM\_002547),

LEO1(pmt,NM\_138792),LEO1(pmt,NM\_001286430),  
SLC25A43(pmt,NM\_145305),

DOCK10(NM\_014689),

ARID5A(NM\_212481),  
ZFAND3(NM\_021943),  
CCNY(NM\_001282852),CCNY(NM\_145012),CCNY(NM\_001282853),CCNY(NM\_181698),CCNY(NM

PEPD(NM\_001166056),PEPD(NM\_001166057),PEPD(NM\_000285),  
KIAA1751(NM\_001080484),

PRDM16(NM\_022114),PRDM16(NM\_199454),

MAPK8IP3(NM\_001040439),MAPK8IP3(NM\_015133),  
JAKMIP3(NM\_001105521),  
MIR1256(NR\_031657),

FKBP10(NM\_021939),

KLHL15(NM\_030624),  
CSMD1(NM\_033225),

VAV1(NM\_001258207),VAV1(NM\_001258206),VAV1(NM\_005428),  
VPS54(NM\_001005739),VPS54(NM\_016516),

PCDH11Y(NM\_032973),  
KCND1(NM\_004979),  
HES4(pmt,NM\_001142467),HES4(pmt,NM\_021170),  
NFATC1(NM\_172388),NFATC1(NM\_172390),NFATC1(NM\_006162),NFATC1(pmt,NM\_00127867  
MBD5(NM\_018328),

RXRA(NM\_002957),  
BAZ1B(NM\_032408),

PPP1R9B(NM\_032595),

EVC(NM\_153717),

CAPN2(NM\_001146068),CAPN2(NM\_001748),

CACNA1H(NM\_021098),CACNA1H(NM\_001005407),  
RAI1(NM\_030665),

CDH6(NM\_004932),  
SHB(NM\_003028),  
THSD7B(NM\_001080427),  
OGDHL(NM\_001143997),OGDHL(NM\_018245),OGDHL(NM\_001143996),  
HIST1H4I(pmt,NM\_003495),HIST1H2BK(NM\_080593),

LOC101929196(NR\_120350),LOC101929196(NR\_120351),THSD4(NM\_024817),LOC101929196(N

CHD5(NM\_015557),

NHS(NM\_001136024),NHS(NM\_198270),

NOTO(NM\_001134462),  
TMEM210(pmt,NM\_001282477),ANAPC2(NM\_013366),LRRC26(pmt,NM\_001013653),

TMEM8A(pmt,NM\_021259),LOC100134368(NR\_024453),  
PTGIR(NM\_000960),

SEMA4D(NM\_006378),SEMA4D(NM\_001142287),  
CCAR2(pmt,NM\_021174),CCAR2(pmt,NR\_033902),C8orf58(NM\_001198827),C8orf58(NM\_0010

ALG12(NM\_024105),  
PTPRH(NM\_002842),PTPRH(NM\_001161440),

FAM19A5(NM\_001082967),FAM19A5(NM\_015381),

GPR133(NM\_198827),

SYTL1(NM\_001193308),SYTL1(NM\_032872),

GAS2L1(NM\_006478),GAS2L1(NM\_001278730),GAS2L1(NM\_152236),  
SAMMD3(NM\_001258275),

LINC00367(NR\_104058),

MYO9B(NM\_004145),MYO9B(NM\_001130065),

C19orf35(NM\_198532),  
TMEM207(NM\_207316),  
NTSR1(pmt,NM\_002531),  
FAM107B(NM\_001282695),FAM107B(NM\_031453),  
TMEM184A(pmt,NM\_001097620),  
TGM2(NM\_004613),  
SIM2(pmt,NM\_009586),SIM2(pmt,NM\_005069),  
ZC3H4(NM\_015168),  
NLGN4X(NM\_020742),NLGN4X(NM\_181332),NLGN4X(NM\_001282146),NLGN4X(NM\_00128214

DLX5(pmt,NM\_005221),

NAV1(NM\_020443),

ABHD1(NM\_032604),

KIF7(NM\_198525),

BLK(NM\_001715),  
PIGB(NM\_004855),  
XAGE3(pmt,NM\_133179),XAGE3(pmt,NM\_130776),  
RBF3X(NM\_001082575),  
PTPRN2(NM\_130842),PTPRN2(NM\_130843),PTPRN2(NM\_002847),

MXRA8(pmt,NM\_001282585),MXRA8(pmt,NM\_032348),MXRA8(NM\_001282583),MXRA8(NM\_

WRB(NM\_004627),WRB(NM\_001146218),

TBX20(pmt,NM\_001166220),TBX20(pmt,NM\_001077653),

CUX1(NM\_001202546),CUX1(NM\_001913),CUX1(NM\_181500),CUX1(NM\_001202545),CUX1(NM\_001202545),SNRNP27(pmt,NR\_037862),SNRNP27(pmt,NM\_006857),

KIF1A(NM\_004321),KIF1A(NM\_001244008),  
LRP2(NM\_004525),

VPS13D(NM\_018156),SNORA59A(pmt,NR\_003025),SNORA59B(pmt,NR\_003022),VPS13D(NM\_018156),

GAGE1(NR\_102272),GAGE1(NM\_001040663),  
LRBA(NM\_001199282),LRBA(NM\_006726),MAB21L2(pmt,NM\_006439),  
NTNG2(NM\_032536),

CELA3B(pmt,NM\_007352),  
GPC1(NM\_002081),

NIFK(pmt,NM\_032390),

COL6A1(NM\_001848),

LOC286094(NR\_026706),  
LOC440311(NR\_077061),  
CTB-12O2.1(NR\_109876),  
SLC25A26(pmt,NM\_173471),

C9orf171(NM\_207417),C9orf171(NM\_001282957),

CCDC136(NM\_022742),CCDC136(NM\_001201372),  
COL24A1(pmt,NM\_152890),  
OTOG(NM\_001277269),  
PTPRD(NM\_130393),PTPRD(NM\_001040712),PTPRD(NM\_002839),PTPRD(NM\_001171025),PTPRD(NM\_001171025),

PDZD2(NM\_178140),

ABCA3(NM\_001089),

MAML3(NM\_018717),

CSMD1(NM\_033225),  
LOC101927332(pmt,NR\_120325),

USP42(NM\_032172),

TNFAIP8(NM\_001077654),TNFAIP8(NM\_001286815),TNFAIP8(NM\_001286817),  
MPPED1(NM\_001044370),  
PRSS3(NM\_001197098),PRSS3(NM\_001197097),PRSS3(NM\_007343),

FAM27A(NR\_024060),FAM27C(NR\_027421),

CCAR1(NM\_018237),CCAR1(NM\_001282959),CCAR1(NR\_104262),SNORD98(pmt,NR\_003076),C

MUC6(NM\_005961),  
SLC1A7(NM\_006671),SLC1A7(NM\_001287597),SLC1A7(NM\_001287595),SLC1A7(NR\_109858),

IRF4(NR\_046000),IRF4(NM\_002460),IRF4(NM\_001195286),  
PRKAR1B(NM\_002735),PRKAR1B(NM\_001164759),PRKAR1B(NM\_001164762),PRKAR1B(NM\_OC  
POM121L9P(pmt,NR\_003714),  
AMOTL1(NM\_130847),

IFITM1(NM\_003641),  
CFLAR(pmt,NM\_001202517),CFLAR(pmt,NM\_001202516),CFLAR(pmt,NM\_001202519),CFLAR(p  
GK(NM\_001128127),GK(NM\_203391),GK(NM\_001205019),GK(NM\_000167),  
ASB9(NM\_001168531),ASB9(NM\_024087),ASB9(NM\_001031739),ASB9(NM\_001168530),  
SLC9A3(NM\_001284351),SLC9A3(NM\_004174),  
ST5(NM\_005418),

MAP3K11(NM\_002419),

LOC100288637(NR\_038253),LOC100288637(NR\_038255),LOC100288637(NR\_038254),  
CDKN1C(pmt,NM\_000076),CDKN1C(pmt,NM\_001122630),CDKN1C(pmt,NM\_001122631),  
GNA11(NM\_002067),  
HDAC9(NM\_058176),HDAC9(NM\_178425),HDAC9(NM\_178423),

RALB(NM\_002881),  
CCDC15(NM\_025004),

MAOA(pmt,NM\_000240),MAOA(pmt,NM\_001270458),

EPS8L1(NM\_133180),EPS8L1(NM\_017729),  
PKNOX2(NM\_022062),  
AHR(NM\_001621),

GAS2L1(NM\_006478),GAS2L1(NM\_001278730),GAS2L1(NM\_152236),  
NFIC(NM\_005597),NFIC(NM\_001245005),NFIC(NM\_001245004),NFIC(NM\_205843),NFIC(NM\_0

OLFML2B(NM\_015441),  
WVOX(NM\_016373),  
NLRP2(pmt,NM\_001174081),NLRP2(pmt,NM\_001174083),NLRP2(pmt,NM\_001174082),NLRP2(  
SATB2(NM\_001172517),SATB2-AS1(pmt,NR\_026830),SATB2(NM\_015265),

FOXK1(NM\_001037165),

H2AFY(pmt,NM\_138610),H2AFY(pmt,NM\_001040158),H2AFY(pmt,NM\_004893),H2AFY(pmt,NM  
LOC100131289(NR\_038929),

LOC339975(pmt,NR\_038931),

SLC6A9(NM\_201649),SLC6A9(NM\_001024845),SLC6A9(NM\_001261380),SLC6A9(NR\_048548),S

ZNF197(NM\_001024855),ZNF197(NM\_006991),

VTRNA1-1(pmt,NR\_026703),  
SPNS3(NM\_182538),

RENBP(NM\_002910),

PTH2R(NR\_073601),  
BRINP3(NM\_199051),

BEND2(NM\_001184767),BEND2(NM\_153346),  
APOBEC3H(NM\_181773),APOBEC3H(NM\_001166004),APOBEC3H(NM\_001166002),APOBEC3H(



DNAH17(NM\_173628),  
SLC9A3(NM\_001284351),SLC9A3(NM\_004174),

DAB2IP(NM\_032552),  
PLXND1(NM\_015103),  
GAS2(NM\_177553),GAS2(NM\_001143830),GAS2(NM\_005256),

STAU2(NM\_001164381),STAU2(NM\_001164380),STAU2(NM\_001164383),STAU2(NM\_001164384),  
RALGDS(NM\_001042368),RALGDS(NM\_001271774),RALGDS(NM\_001271775),  
CDH6(NM\_004932),

KIF26A(NM\_015656),  
INPP5A(NM\_005539),  
PTPRS(NM\_130853),PTPRS(NM\_002850),PTPRS(NM\_130854),PTPRS(NM\_130855),

TMEM204(NM\_024600),TMEM204(NM\_001256541),IFT140(NM\_014714),  
NBPF20(NM\_001278267),NBPF10(NM\_001039703),POLR3GL(NM\_032305),  
ITPR3(NM\_002224),  
DNAJA4(pmt,NM\_001130183),DNAJA4(pmt,NM\_001130182),DNAJA4(NM\_018602),  
FENDRR(pmt,NR\_036444),FOXF1(NM\_001451),FENDRR(pmt,NR\_033925),  
ATP1B2(pmt,NM\_001678),

LIMCH1(NM\_001112718),LIMCH1(NM\_001289122),LIMCH1(NM\_001112717),LIMCH1(NM\_001112716),

PRDM16(NM\_022114),MIR4251(pmt,NR\_036215),PRDM16(NM\_199454),

GPR56(NM\_001290143),GPR56(NM\_001145770),GPR56(NM\_001145771),GPR56(NM\_201524),

INO80C(pmt,NM\_194281),INO80C(pmt,NM\_001098817),

ATP2A1(NM\_004320),ATP2A1(NM\_173201),LOC100289092(pmt,NR\_046287),ATP2A1(NM\_001142352),  
ST6GAL2(NM\_032528),ST6GAL2(NM\_001142352),ST6GAL2(NM\_001142351),  
FLT4(NM\_182925),  
ISL2(NM\_145805),

GRIK5(NM\_002088),

MIR143HG(NR\_105060),MIR143HG(NR\_105059),  
UMODL1(NM\_001199528),UMODL1(NM\_001004416),UMODL1(NM\_173568),UMODL1(NM\_00

ITPK1(NM\_001142593),ITPK1(NM\_014216),ITPK1(NM\_001142594),  
DAGLA(NM\_006133),  
SPIRE1(NM\_001128627),SPIRE1(NM\_020148),SPIRE1(NM\_001128626),  
EYS(NM\_001142800),

GPR133(NM\_198827),  
NFATC1(NM\_172388),NFATC1(NM\_006162),NFATC1(NM\_172389),NFATC1(NM\_001278673),NF

C7orf50(NM\_001134395),C7orf50(NM\_001134396),MIR339(pmt,NR\_029898),C7orf50(NM\_032  
PTPRN2(NM\_130842),PTPRN2(NM\_130843),PTPRN2(NM\_002847),

MST1L(pmt,NM\_001271733),  
MUC6(NM\_005961),  
PTPRN2(NM\_130842),PTPRN2(NM\_130843),PTPRN2(NM\_002847),  
CNP(NM\_033133),  
PCDH19(NM\_001184880),PCDH19(NM\_020766),PCDH19(NM\_001105243),  
STK3(NM\_001256312),OSR2(pmt,NM\_001286841),OSR2(pmt,NM\_053001),OSR2(pmt,NM\_001:

ITGB4(NM\_000213),ITGB4(NM\_001005731),ITGB4(pmt,NM\_001005619),

MAPK8IP3(NM\_001040439),MAPK8IP3(NM\_015133),

CSMD1(NM\_033225),  
STAT5A(NM\_003152),STAT5A(NM\_001288719),STAT5A(NM\_001288718),STAT5A(NM\_0012887  
RAI1(NM\_030665),  
ANAPC7(NM\_016238),ANAPC7(NM\_001137664),

LOC100130992(NR\_038921),  
ARSG(NM\_001267727),ARSG(NM\_014960),PRKAR1A(NM\_001278433),

ST8SIA1(pmt,NM\_003034),

TMEM52(NM\_178545),  
ANKRD20A3(NM\_001012419),ANKRD20A1(NM\_032250),  
GRK1(NM\_002929),

MIR6719(pmt,NR\_106777),DYRK1B(NM\_004714),DYRK1B(NM\_006483),DYRK1B(NM\_006484),

C1orf216(pmt,NM\_152374),  
CDC42EP4(pmt,NM\_012121),  
ADARB2(NM\_018702),

SLC52A2(pmt,NR\_045600),TMEM249(NR\_047684),TMEM249(NM\_001252402),SLC52A2(pmt,N

PIEZO2(NM\_022068),

DLL1(NM\_005618),FAM120B(pmt,NM\_001286379),

TOR4A(NM\_017723),

FGF14(NM\_004115),FGF14(NM\_175929),  
SDC3(pmt,NM\_014654),

MYRF(NM\_013279),MYRF(NM\_001127392),  
UST(NM\_005715),

WBSCR17(NM\_022479),

LOC100288866(NR\_103773),  
IL1RAPL1(NM\_014271),

GFPT1(NM\_001244710),GFPT1(NM\_002056),

GPM6B(NM\_001001996),GPM6B(NM\_001001995),GPM6B(NM\_001001994),GPM6B(NM\_0052  
USP11(NM\_004651),

ANKS1B(NM\_001204066),ANKS1B(NM\_152788),ANKS1B(NM\_001204067),ANKS1B(pmt,NM\_OC

ANO8(NM\_020959),

BRDT(NM\_001726),BRDT(NM\_001242808),BRDT(NM\_001242810),BRDT(NM\_001242806),BRD1  
GNAS(pmt,NM\_080426),GNAS(NM\_001077490),GNAS(pmt,NM\_000516),GNAS(pmt,NM\_00107  
XRR1(NM\_001270381),XRR1(NM\_182969),XRR1(NM\_001270380),

PRDM16(NM\_022114),PRDM16(NM\_199454),

KCNQ1(NM\_181798),KCNQ1(NM\_000218),  
WDR44(pmt,NM\_001184965),WDR44(pmt,NM\_001184966),WDR44(pmt,NM\_019045),

MSN(NM\_002444),

DLL1(NM\_005618),FAM120B(pmt,NM\_001286379),

DIAPH2(NM\_007309),DIAPH2(NM\_006729),  
ZNF143(pmt,NM\_003442),ZNF143(pmt,NM\_001282657),ZNF143(pmt,NM\_001282656),  
ADARB2(NM\_018702),  
TBC1D24(NM\_001199107),TBC1D24(NM\_020705),

NLGN4X(NM\_020742),NLGN4X(NM\_181332),NLGN4X(NM\_001282146),NLGN4X(NM\_00128214

KLF2(NM\_016270),  
KCNQ1(NM\_181798),KCNQ1(NM\_000218),

BCOR(NM\_001123383),BCOR(NM\_001123384),  
SHANK1(NM\_016148),

BHMT(NM\_001713),  
RNF213(NM\_020954),RNF213(NM\_001256071),  
CNOT8(pmt,NM\_004779),

PIK3R5(NM\_001251855),PIK3R5(NM\_001251853),PIK3R5(NM\_001251852),PIK3R5(NM\_001251851),  
ANKRD44(NM\_153697),ANKRD44(NM\_001195144),

CPZ(NM\_001014447),CPZ(NM\_001014448),CPZ(NM\_003652),

TMEM161A(pmt,NM\_017814),TMEM161A(pmt,NM\_001256766),  
LINC01115(NR\_033880),LINC01115(NR\_111963),  
KCNQ4(NM\_004700),KCNQ4(NM\_172163),  
RNF212(NM\_194439),RNF212(NM\_001193318),RNF212(NM\_001131034),  
KCNQ4(NM\_004700),KCNQ4(NM\_172163),  
TMEM204(NM\_024600),TMEM204(NM\_001256541),IFT140(NM\_014714),

ARHGEF9(NM\_001173479),  
TNXB(NM\_019105),  
C16orf45(pmt,NM\_033201),

STARD13(NM\_001243476),

LOC400794(NR\_026744),

C22orf34(NR\_110522),C22orf34(NR\_110523),C22orf34(NM\_001289922),

CDC42(pmt,NM\_001039802),CDC42(pmt,NM\_044472),CDC42(pmt,NM\_001791),

REC8(pmt,NM\_005132),REC8(pmt,NM\_001048205),

BEGAIN(NM\_001159531),BEGAIN(NM\_020836),  
NCOR2(NM\_001077261),NCOR2(NM\_001206654),NCOR2(NM\_006312),  
MUC6(NM\_005961),

GPR143(NM\_000273),

ACE(NM\_000789),ACE(pmt,NM\_152830),ACE(pmt,NM\_001178057),

MAPK12(pmt,NM\_002969),MAPK11(NM\_002751),MAPK11(NR\_110887),

PALD1(NM\_014431),

SPRED3(NM\_001042522),SPRED3(NR\_073032),

CELF2(NM\_001025076),CELF2(NM\_001025077),CELF2(NM\_001083591),CELF2(NM\_006561),

CDHR2(pmt,NM\_001171976),RNF44(pmt,NM\_014901),

PDE4D(pmt,NM\_001197221),PDE4D(pmt,NM\_001197222),PDE4D(NM\_001197219),PDE4D(NM\_

C20orf112(NM\_001256798),

CLDN9(pmt,NM\_020982),

CTSB(NM\_001908),CTSB(NM\_147783),CTSB(NM\_147780),CTSB(NM\_147781),CTSB(NM\_147782),

CDK2AP1(NR\_073007),CDK2AP1(NM\_004642),CDK2AP1(pmt,NM\_001270434),CDK2AP1(NR\_07

LOC100133461(pmt,NR\_034136),

ADARB1(NR\_073200),ADARB1(NM\_015834),ADARB1(NR\_027674),ADARB1(NM\_001112),ADARB1

TRIM72(NM\_001008274),

ZIM2(NM\_001146327),ZIM2(NM\_015363),PEG3(NM\_006210),PEG3(NM\_001146185),MIMT1(p

CDHR5(NM\_021924),CDHR5(NM\_031264),CDHR5(NM\_001171968),

ZNF804A(NM\_194250),

SLFN11(pmt,NM\_001104589),SLFN11(pmt,NM\_001104588),SLFN11(pmt,NM\_001104587),SLFN

PRDM10(NM\_199438),PRDM10(NM\_199437),PRDM10(NM\_020228),PRDM10(NM\_199439),

PLXNB3(NM\_005393),PLXNB3(NM\_001163257),

TSPEAR-AS1(NR\_103707),TSPEAR(NM\_144991),TSPEAR(NM\_001272037),

C22orf34(NR\_110522),C22orf34(NR\_110523),

HEMGN(NM\_197978),HEMGN(NM\_018437),

RADIL(NM\_018059),

HAND1(pmt,NM\_004821),

C16orf45(NM\_033201),  
ATP8B3(NM\_138813),ATP8B3(NR\_047593),ATP8B3(NM\_001178002),  
ATP11A(NM\_015205),ATP11A(NM\_032189),

APP(NM\_201413),APP(NM\_000484),APP(NM\_001136016),APP(NM\_201414),APP(NM\_0012043

GAL(NM\_015973),  
PCDHGB1(NM\_018922),PCDHGA11(NM\_032092),PCDHGC4(NM\_018928),PCDHGA3(NM\_01891

POU4F2(NM\_004575),  
TFR2(NM\_003227),TFR2(pmt,NM\_001206855),

CCDC146(NM\_020879),

KIF21B(NM\_001252103),KIF21B(NM\_001252100),KIF21B(NM\_017596),KIF21B(NM\_001252102),  
NUDT10(NM\_153183),

PPAP2C(NM\_177526),PPAP2C(NM\_177543),PPAP2C(NM\_003712),  
EN2(pmt,NM\_001427),  
WI2-81516E3.1(NR\_038944),  
BTNL9(NM\_152547),  
TSPAN4(NM\_001025239),TSPAN4(NM\_001025238),TSPAN4(NM\_003271),TSPAN4(NM\_001025

LOC101929234(pmt,NR\_110304),ZNF503-AS2(NR\_024421),ZNF503-AS2(NR\_110299),ZNF503-AS2(NR\_110299),  
RHPN2(pmt,NM\_033103),  
MCF2(NM\_001099855),MCF2(NM\_001171876),

OXT(NM\_000915),

DGCR5(NR\_045121),DGCR5(NR\_110533),DGCR5(NR\_002733),

LOC400548(NR\_033984),

TMEM88(pmt,NM\_203411),CYB5D1(pmt,NM\_144607),  
DCP1B(NM\_152640),

BDH1(NM\_203315),BDH1(NM\_004051),BDH1(NM\_203314),  
PTGDR2(NM\_004778),

NAALADL2(NM\_207015),  
OXT(NM\_000915),

PRKAR1B(NM\_002735),PRKAR1B(NM\_001164760),PRKAR1B(NM\_001164762),PRKAR1B(NM\_OC

CHST15(NM\_015892),CHST15(NM\_001270764),CHST15(NM\_014863),CHST15(NM\_001270765)  
PIGG(pmt,NM\_001289052),PIGG(pmt,NR\_110293),PIGG(pmt,NM\_001289053),PIGG(pmt,NM\_0

BTBD19(NM\_001136537),  
IRX3(NM\_024336),  
PRRG1(NM\_001173490),PRRG1(NM\_001173489),PRRG1(NM\_000950),PRRG1(NM\_001173486),

UBXN10(NM\_152376),UBXN10-AS1(pmt,NR\_110078),  
PVRL1(NM\_002855),PVRL1(NM\_203285),PVRL1(NM\_203286),  
SOGA3(NM\_001012279),

SLC4A4(NM\_001098484),SLC4A4(NM\_001134742),  
ZNF292(NM\_015021),

ICA1L(pmt,NM\_138468),ICA1L(pmt,NM\_001288623),ICA1L(pmt,NM\_001288622),  
LRP1B(NM\_018557),  
TMEM167B(pmt,NM\_020141),

TXLNG2P(NR\_045129),TXLNG2P(NR\_045128),

MIR548H4(NR\_031680),NOX5(NR\_033672),NOX5(NM\_024505),NOX5(NR\_033671),NOX5(NM\_C  
SIDT2(NM\_001040455),  
PHOX2B(NM\_003924),  
SLC6A3(NM\_001044),  
SLC38A8(NM\_001080442),  
KCNAB2(NM\_001199863),KCNAB2(NM\_001199860),KCNAB2(NM\_001199861),KCNAB2(NM\_00  
PDX1-AS1(NR\_047484),PDX1(pmt,NM\_000209),



CSMD1(NM\_033225),

C5orf58(NM\_001102609),  
SLC7A7(NR\_040448),SLC7A7(NM\_001126106),SLC7A7(NM\_001126105),  
KDM2B(NM\_001005366),KDM2B(NM\_032590),

COL4A6(NM\_033641),COL4A5(pmt,NM\_000495),COL4A6(NM\_001287759),COL4A6(NM\_001287759),  
MAML1(NM\_014757),

BARHL2(pmt,NM\_020063),  
YAE1D1(NM\_001282446),  
RBMS3(NM\_014483),RBMS3(NM\_001003792),RBMS3(NM\_001003793),RBMS3(NM\_00117771),  
C11orf87(NM\_207645),  
NREP(NM\_001142474),NREP(pmt,NM\_001142478),NREP(NM\_001142475),NREP(NM\_001142475),

CCDC37(NM\_182628),

LCN15(pmt,NM\_203347),

SYCE2(pmt,NM\_001105578),  
METRNL(NM\_001004431),

GDA(NM\_001242507),GDA(NM\_001242505),GDA(NM\_004293),GDA(NM\_001242506),  
NPY(NM\_000905),

FIBCD1(pmt,NM\_032843),FIBCD1(pmt,NM\_001145106),

ZNF300(NM\_052860),ZNF300(NM\_001172831),ZNF300(NM\_001172832),

BOK-AS1(NR\_033346),  
FBXO21(NM\_033624),FBXO21(NM\_015002),  
LOC285696(NR\_027253),

CSMD1(NM\_033225),

PALM(NM\_002579),PALM(NM\_001040134),  
POU3F2(pmt,NM\_005604),

HSD17B7P2(NR\_003086),  
WNT7B(NM\_058238),  
KCNQ1(NM\_000218),

MAFG(pmt,NM\_002359),

TLL12(NM\_015140),

ATRX(NM\_138270),ATRX(NM\_000489),

CCDC78(pmt,NM\_001031737),HAGHL(NM\_001290137),HAGHL(NM\_001290139),HAGHL(NM\_0

DCDC2C(pmt,NM\_001287444),  
TERT(NM\_001193376),TERT(NM\_198253),  
METRNL(NM\_001004431),  
LRBA(NM\_001199282),LRBA(NM\_006726),MAB21L2(NM\_006439),

GDF7(NM\_182828),

PLEC(NM\_000445),PLEC(NM\_201378),PLEC(NM\_201379),PLEC(pmt,NM\_201380),

RGMA(NM\_001166287),RGMA(pmt,NM\_001166286),RGMA(NM\_001166289),RGMA(NM\_0011  
AR(NM\_000044),

ACSBG1(NM\_015162),ACSBG1(NM\_001199377),  
RHO(pmt,NR\_037962),DUSP5P1(pmt,NR\_002834),

NOS3(NM\_000603),  
AGMO(NM\_001004320),  
ACSF2(NM\_001288969),CHAD(pmt,NM\_001267),ACSF2(NM\_025149),ACSF2(NM\_001288970),/

MNX1(NM\_001165255),MNX1(NM\_005515),

ZNF467(NM\_207336),

TRPV1(NM\_080706),TRPV1(NM\_018727),TRPV1(NM\_080705),TRPV1(NM\_080704),

DIAPH2(NM\_007309),DIAPH2(NM\_006729),  
CNTNAP5(NM\_130773),  
DGKG(NM\_001346),DGKG(NM\_001080744),DGKG(NM\_001080745),

SARDH(NM\_001134707),SARDH(NM\_007101),  
MIDN(NM\_177401),  
RBF3X3(NM\_001082575),  
EBPL(pmt,NM\_001278636),EBPL(pmt,NR\_103802),EBPL(pmt,NR\_103803),EBPL(pmt,NM\_03256  
ST8SIA3(NM\_015879),

CNTN4(NM\_175607),CNTN4(NM\_001206955),

CRTC1(NM\_015321),CRTC1(NM\_001098482),  
OCIAD2(NM\_001286774),OCIAD2(NM\_152398),OCIAD2(NR\_104589),OCIAD2(NM\_001014446),  
MAP6D1(NM\_024871),

CHGA(NM\_001275),

OSMR-AS1(NR\_109951),

PRKAR1B(NM\_002735),PRKAR1B(NM\_001164759),PRKAR1B(NM\_001164762),PRKAR1B(NM\_OC  
YTHDF1(NM\_017798),  
PRKAR1B(NM\_002735),PRKAR1B(NM\_001164760),PRKAR1B(NM\_001164762),PRKAR1B(NM\_OC  
KIF26B(NM\_018012),  
LINC00554(NR\_047483),  
TMEM175(NM\_032326),

C5orf66(pmt,NM\_001277348),PITX1(NM\_002653),

CASC5(NM\_144508),CASC5(NM\_170589),

CRISPLD2(NM\_031476),

CCDC85A(NM\_001080433),  
RPH3AL(NM\_006987),RPH3AL(NM\_001190412),RPH3AL(NM\_001190413),RPH3AL(NM\_001190414),  
SLC27A1(pmt,NM\_198580),

RASA3(NM\_007368),  
ANKRD27(pmt,NM\_032139),RGS9BP(NM\_207391),  
COPB2(NM\_004766),COPB2(NR\_023350),  
SORCS2(NM\_020777),

RAP1GAP2(NM\_015085),RAP1GAP2(NM\_001100398),

ITPKA(NM\_002220),  
EGR4(NM\_001965),  
SKI(NM\_003036),  
CRMP1(pmt,NM\_001288661),CRMP1(pmt,NM\_001288662),CRMP1(NM\_001014809),CRMP1(pmt,NM\_001014809),  
TMED7-TICAM2(NM\_001164469),TICAM2(NM\_021649),LOC101927100(NR\_109874),LOC101927100(NR\_109874),  
SNRPN(NM\_022807),SNRPN(NM\_022806),SNRPN(NM\_022808),SNRPN(NM\_022805),  
SLC12A5(NM\_001134771),SLC12A5(NM\_020708),

MUC20(NM\_020790),MUC20(NM\_001291833),MUC20(NM\_001282506),MUC20(NM\_152673),  
CPSF1(pmt,NM\_013291),SLC39A4(NM\_130849),SLC39A4(NM\_001280557),SLC39A4(NM\_01776),  
TEAD4(NM\_201443),TEAD4(NM\_003213),TEAD4(NM\_201441),  
KCNG2(NM\_012283),  
SPACA6P(NR\_024330),  
CUX1(NM\_001202546),CUX1(NM\_001913),CUX1(NM\_181500),CUX1(NM\_001202545),CUX1(NM\_001202545),

CACNA1H(NM\_021098),CACNA1H(NM\_001005407),  
TENM4(NM\_001098816),  
FANCA(NM\_001286167),FANCA(NM\_000135),FANCA(NM\_001018112),  
NARS(pmt,NM\_004539),  
PDE9A(NM\_001001578),PDE9A(NM\_001001579),PDE9A(NM\_001001585),PDE9A(NM\_001001585),

GPR153(NM\_207370),  
RBMY1F(NM\_152585),  
TPO(NM\_000547),TPO(NM\_175719),TPO(NM\_001206745),TPO(NM\_001206744),TPO(NM\_175719),  
ALOX5(NM\_000698),ALOX5(NM\_001256153),ALOX5(NM\_001256154),

TBC1D3P1-DHX40P1(NR\_002924),  
CRIP2(NR\_073081),CRIP2(NM\_001312),CRIP2(NR\_073084),CRIP2(NR\_073083),CRIP2(NR\_073083),  
IGSF3(NM\_001007237),IGSF3(NM\_001542),

IGSF9B(NM\_001277285),

LINC00941(NR\_040245),  
CST9(pmt,NM\_001008693),

VIPR2(pmt,NM\_003382),  
FAM19A5(NM\_001082967),FAM19A5(NM\_015381),

NUBPL(NM\_001201573),NUBPL(NM\_025152),

LOC102724316(NR\_110922),SVIL(NM\_021738),LOC102724316(NR\_110927),SVIL(NM\_003174),I

C22orf34(NR\_110522),C22orf34(NR\_110523),  
ATP6V0CP3(pmt,NR\_037141),PRPH2(pmt,NM\_000322),  
RADIL(NM\_018059),

PARD6G-AS1(pmt,NR\_028339),PARD6G-AS1(pmt,NR\_028340),  
KCNK3(NM\_002246),

RHOU(pmt,NR\_037962),DUSP5P1(pmt,NR\_002834),

LRP1B(NM\_018557),  
NBEAL1(NM\_001114132),

RFPL2(pmt,NM\_001098527),RFPL2(pmt,NM\_001159546),RFPL2(pmt,NM\_001159545),

CD38(NM\_001775),

ZDHHC9(pmt,NM\_001008222),ZDHHC9(pmt,NM\_016032),  
TSNAXIP1(NM\_018430),TSNAXIP1(NM\_001288990),TSNAXIP1(NM\_001288991),TSNAXIP1(NM\_

LINC00466(pmt,NR\_038252),FOXD3(pmt,NM\_012183),  
CASKIN1(NM\_020764),  
RGP3(NM\_001144013),  
USP17L21(pmt,NM\_001256862),USP17L11(NM\_001256854),USP17L12(pmt,NM\_001256853),U  
TRAPPC5(NM\_001042462),TRAPPC5(NM\_001042461),TRAPPC5(NM\_174894),

FZD8(NM\_031866),

DIP2C(NM\_014974),

AGRN(NM\_198576),

ISPD-AS1(NR\_038946),ISPD-AS1(NR\_038947),ISPD(NM\_001101417),ISPD(NM\_001101426),  
MXRA5(NM\_015419),  
SLC22A18(NM\_183233),SLC22A18(NM\_002555),SLC22A18AS(pmt,NM\_007105),

CALCB(NM\_000728),

B9D1(NM\_001243475),B9D1(NM\_001243473),MIR1180(pmt,NR\_031591),B9D1(NM\_015681),

POM121L9P(NR\_003714),

DKKL1(NM\_001197302),DKKL1(NM\_001197301),LOC101928295(NR\_110729),DKKL1(NM\_01441

LOC101927421(NR\_109882),

ESPNL(NM\_194312),

CUX2(NM\_015267),

ARMCX2(NM\_177949),ARMCX2(NM\_014782),ARMCX2(NM\_001282231),

MTMR4(NM\_004687),

HS3ST4(NM\_006040),

TRPM3(NM\_206946),TRPM3(NM\_001007471),TRPM3(NM\_024971),TRPM3(NM\_020952),TRPM

CACNB2(NM\_000724),CACNB2(NM\_201571),CACNB2(NM\_201596),CACNB2(NM\_201597),CACI

ZSWIM1(NM\_080603),

NPBWR1(NM\_005285),

RBM20(NM\_001134363),

ZBTB46(NM\_025224),

BAHCC1(NM\_001291324),BAHCC1(NM\_001080519),

ZNF232(NM\_014519),

DLEU1(NR\_109974),

TBX4(pmt,NM\_018488),

PI4KA(NM\_058004),

ZFP36(NM\_003407),PLEKHG2(pmt,NM\_022835),

GGT5(pmt,NM\_004121),GGT5(pmt,NM\_001099781),GGT5(pmt,NM\_001099782),

COL4A4(NM\_000092),

CASZ1(NM\_001079843),

TTYH2(NM\_032646),TTYH2(NM\_052869),

GSTM1(pmt,NM\_000561),GSTM1(pmt,NM\_146421),

SORCS2(NM\_020777),

IGFBP7-AS1(NR\_034081),

WDR27(NM\_182552),WDR27(NM\_001202550),

SRPK2(NM\_182692),

KRT8(NR\_045962),KRT8(NM\_001256282),KRT8(NM\_001256293),KRT8(pmt,NM\_002273),

TPCN2(pmt,NM\_139075),

RALGDS(pmt,NM\_001271776),RALGDS(NM\_001271774),RALGDS(NM\_001271775),RALGDS(pmt

FGF12(NM\_004113),FGF12(pmt,NM\_021032),  
ING2(NM\_001564),  
RADIL(NM\_018059),  
ASPG(NM\_001080464),



ESRRG(NM\_001243507),ESRRG(NM\_001243510),ESRRG(NM\_001243505),ESRRG(NM\_206594),E

NM\_001199322),BLOC1S5(NM\_001199323),

PR1(NM\_001261454),GPR1(NM\_001261455),GPR1(NM\_005279),  
1193635),

1),  
56182),

31(NM\_001278673),NFATC1(NM\_172387),NFATC1(NM\_001278672),NFATC1(NM\_001278670),N

VI\_001282854),

3),NFATC1(pmt,NM\_001278672),NFATC1(NM\_001278670),NFATC1(pmt,NM\_172387),NFATC1(I

NR\_120348),LOC101929196(NR\_120349),

13842),C8orf58(NM\_173686),

15),

001282582),MXRA8(pmt,NM\_001282584),

v\_001202543),CUX1(NM\_001202544),CUX1(NM\_181552),

15378),

RD(NM\_130391),PTPRD(NM\_130392),

:CAR1(NM\_001282960),

)1164760),PRKAR1B(NM\_001164761),LOC101926963(NR\_110054),LOC101926963(NR\_110055),

pmt,NM\_003879),CFLAR(pmt,NM\_001127183),CFLAR(pmt,NM\_001127184),

01245002),

pmt,NM\_017852),

A\_138609),

LC6A9(NR\_048549),SLC6A9(NM\_006934),

NM\_001166003),



82),

289124),LIMCH1(NM\_014988),

GPR56(NM\_201525),GPR56(NM\_005682),GPR56(NM\_001145774),GPR56(NM\_001145773),GPF

286075),LOC100289092(pmt,NR\_046289),LOC100289092(pmt,NR\_046290),LOC100289092(pmt

1199527),C21orf128(NR\_027243),

NFATC1(NM\_172387),NFATC1(NM\_001278672),NFATC1(NM\_001278670),NFATC1(NM\_00127866  
1350),

142462),

120),

M\_024531),SLC52A2(pmt,NM\_001253816),TMEM249(NM\_001252404),SLC52A2(pmt,NM\_0012

78),

)1204079),ANKS1B(NM\_020140),ANKS1B(NM\_001204068),ANKS1B(NM\_001204069),ANKS1B(N

Γ(NM\_207189),BRDT(NM\_001242807),BRDT(NM\_001242805),  
7489),GNAS(pmt,NR\_003259),GNAS(pmt,NM\_001077488),GNAS(NM\_080425),GNAS(NM\_0165

15),

851),PIK3R5(NM\_014308),PIK3R5(NM\_001142633),

\_006203),PDE4D(NM\_001197218),PDE4D(NM\_001165899),PDE4D(NM\_001197220),PDE4D(NM

2),  
3008),CDK2AP1(NM\_001270433),

B1(NM\_001160230),ADARB1(NR\_027672),ADARB1(NR\_027673),ADARB1(NM\_015833),

mt,NR\_024059),PEG3(NM\_001146187),ZIM2(NM\_001146326),PEG3(NM\_001146184),

l11(pmt,NM\_001104590),SLFN11(pmt,NM\_152270),

01),APP(NM\_001204303),APP(NM\_001136131),APP(NM\_001136129),APP(NM\_001136130),AP

.6),PCDHGB3(NM\_018924),PCDHGB2(NM\_018923),PCDHGC3(NM\_002588),PCDHGA9(NM\_0189

),

236),TSPAN4(NM\_001025237),TSPAN4(NM\_001025235),TSPAN4(NM\_001025234),

S2(NR\_110301),ZNF503-AS2(NR\_024422),ZNF503-AS2(NR\_110302),ZNF503(pmt,NM\_032772),Z

)1164759),PRKAR1B(NM\_001164758),PRKAR1B(NM\_001164761),

,  
01289051),ZNF721(NM\_133474),PIGG(pmt,NM\_001289057),PIGG(pmt,NM\_001289055),PIGG(t

,PRRG1(NM\_001142395),

)01184780),NOX5(NM\_001184779),

3636),KCNAB2(NM\_001199862),KCNAB2(NM\_172130),



7758),COL4A6(NM\_001287760),COL4A5(pmt,NM\_033380),COL4A6(NM\_001847),

2),RBMS3(NM\_001177711),

77),NREP(NM\_001142476),NREP(pmt,NM\_004772),NREP(pmt,NM\_001142481),NREP(pmt,NM\_

32304),

66288),RGMA(NM\_020211),RGMA(NM\_001166283),

\ACSF2(NM\_001288968),ACSF2(NR\_110232),ACSF2(NM\_001288972),ACSF2(NM\_001288971),

5),

OCIAD2(NM\_001286773),

)1164760),PRKAR1B(NM\_001164761),LOC101926963(NR\_110054),LOC101926963(NR\_110055),

)1164759),PRKAR1B(NM\_001164758),PRKAR1B(NM\_001164761),

411),

mt,NM\_001313),  
7100(NR\_109875),TMED7-TICAM2(NM\_001164468),

i7),

v\_001202543),CUX1(NM\_001202544),CUX1(NM\_181552),

77),PDE9A(NM\_001001584),PDE9A(NM\_001001576),PDE9A(NM\_001001582),PDE9A(NM\_0010

722),TPO(NM\_175721),

2),CRIP2(NM\_001270837),CRIP2(NR\_073085),CRIP2(NM\_001270841),

LOC102724316(NR\_110921),LOC102724316(NR\_110920),

.001288992),TSNAXIP1(NM\_001288993),TSNAXIP1(NM\_001288994),

SP17L22(NM\_001256863),USP17L20(NM\_001256861),

L9),

13(NM\_206945),TRPM3(NM\_206944),TRPM3(NM\_206947),

NB2(NM\_201593),CACNB2(NM\_201572),CACNB2(NM\_001167945),

t,NM\_006266),RALGDS(NM\_001042368),





ESRRG(NM\_001243512),ESRRG(NM\_001243513),ESRRG(NM\_001243514),ESRRG(NM\_00124351

√FATC1(NM\_001278669),NFATC1(NM\_001278675),

pmt,NM\_001278675),NFATC1(NM\_001278669),NFATC1(pmt,NM\_172389),







PRKAR1B(NM\_001164758),





56(NM\_001290142),GPR56(NM\_001290144),GPR56(NM\_001145772),

;NR\_046288),

i9),

!53815),TMEM249(NM\_001280561),

M\_181670),ANKS1B(pmt,NM\_001204065),ANKS1B(pmt,NM\_001204080),ANKS1B(pmt,NM\_001

i92),



|\_001104631),

P(NM\_001204302),

921),PCDHGB5(NM\_018925),PCDHGB6(NM\_018926),PCDHGA1(NM\_018912),PCDHGA5(NM\_018

NF503-AS2(NR\_110300),

omt,NM\_017733),PIGG(pmt,NM\_001127178),



.001142480),NREP(pmt,NM\_001142479),NREP(pmt,NM\_001142483),NREP(pmt,NM\_001142482



PRKAR1B(NM\_001164758),

01567),PDE9A(NM\_001001572),PDE9A(NM\_002606),PDE9A(NM\_001001574),PDE9A(NM\_0010











1),





















1204081),ANKS1B(NM\_001204070),







8918),PCDHGB4(NM\_003736),PCDHGC5(NM\_018929),PCDHGA10(NM\_018913),PCDHGA12(NM





2),





01575),PDE9A(NM\_001001583),PDE9A(NM\_001001568),PDE9A(NM\_001001570),PDE9A(NM\_C









































\_003735),PCDHGA8(NM\_032088),PCDHGA2(NM\_018915),PCDHGA6(NM\_018919),PCDHGC3(NI











)01001571),PDE9A(NM\_001001573),PDE9A(NM\_001001581),PDE9A(NM\_001001580),PDE9A(NI









































M\_032403),PCDHGA7(NM\_018920),PCDHGA11(NM\_018914),PCDHGA4(NM\_018917),PCDHGB7











M\_001001569),









































'(NM\_018927),

| <b>DMR_coordinate</b>     | <b>DMR size</b> | <b>z-score</b> | <b>Δ methylation<br/>(LGA-AGA)</b> |       |
|---------------------------|-----------------|----------------|------------------------------------|-------|
| chr20:49078681-49078762   |                 | 81             | 7.81                               | 0.615 |
| chr19:10923392-10923449   |                 | 57             | 7.03                               | 0.52  |
| chr7:2958176-2958274      |                 | 98             | 7.43                               | 0.5   |
| chr16:4999854-4999888     |                 | 34             | 5.74                               | 0.487 |
| chr2:2476829-2476838      |                 | 9              | 5                                  | 0.477 |
| chr8:92209891-92209958    |                 | 67             | 10.09                              | 0.468 |
| chr22:19527146-19527220   |                 | 74             | 5.21                               | 0.465 |
| chr2:65527599-65527652    |                 | 53             | 5.57                               | 0.461 |
| chr20:50268651-50268740   |                 | 89             | 6.16                               | 0.453 |
| chr17:77011912-77011963   |                 | 51             | 5.09                               | 0.452 |
| chrX:108674697-108674724  |                 | 27             | 4.91                               | 0.452 |
| chr18:73766095-73766169   |                 | 74             | 6.03                               | 0.445 |
| chr18:77609956-77610031   |                 | 75             | 9.28                               | 0.443 |
| chr2:204592293-204592358  |                 | 65             | 5.19                               | 0.442 |
| chr12:6638149-6638218     |                 | 69             | 6.34                               | 0.435 |
| chr16:73864022-73864098   |                 | 76             | 4.57                               | 0.434 |
| chr2:126570011-126570057  |                 | 46             | 6.17                               | 0.432 |
| chr14:19552727-19552828   |                 | 101            | 12.24                              | 0.432 |
| chr5:178898870-178898916  |                 | 46             | 4.61                               | 0.425 |
| chr7:135013892-135013955  |                 | 63             | 4.73                               | 0.422 |
| chr2:194445117-194445150  |                 | 33             | 4.55                               | 0.418 |
| chr6:38101245-38101327    |                 | 82             | 8.61                               | 0.417 |
| chr5:102028776-102028858  |                 | 82             | 5.3                                | 0.413 |
| chr10:134908989-134909025 |                 | 36             | 4.59                               | 0.408 |
| chr7:502321-502350        |                 | 29             | 8.72                               | 0.408 |
| chr9:137126619-137126668  |                 | 49             | 5.52                               | 0.403 |
| chrX:10697844-10697895    |                 | 51             | 4.81                               | 0.4   |
| chr11:128694463-128694537 |                 | 74             | 8.04                               | 0.399 |
| chr21:44163639-44163717   |                 | 78             | 5.54                               | 0.396 |
| chr17:54936608-54936680   |                 | 72             | 6.94                               | 0.395 |
| chr8:101766235-101766286  |                 | 51             | 4.19                               | 0.395 |
| chr11:71511987-71512075   |                 | 88             | 7.51                               | 0.394 |
| chr16:1265184-1265231     |                 | 47             | 4.25                               | 0.388 |
| chr18:21911390-21911454   |                 | 64             | 4.76                               | 0.388 |
| chr20:47002073-47002162   |                 | 89             | 7.25                               | 0.388 |
| chr10:50649667-50649757   |                 | 90             | 5.39                               | 0.386 |
| chrX:119035737-119035913  |                 | 176            | 6.47                               | 0.385 |
| chr1:236206818-236206894  |                 | 76             | 4.08                               | 0.382 |
| chr15:40894318-40894381   |                 | 63             | 8.92                               | 0.382 |



|                           |     |      |       |
|---------------------------|-----|------|-------|
| chr20:60950552-60950644   | 92  | 7.13 | 0.378 |
| chr1:206189477-206189542  | 65  | 7.07 | 0.378 |
| chr8:101117947-101118030  | 83  | 6.01 | 0.377 |
| chr10:74304021-74304057   | 36  | 5.5  | 0.375 |
| chrX:64628392-64628449    | 57  | 5.18 | 0.375 |
| chr1:206941320-206941367  | 47  | 4.64 | 0.374 |
| chrX:27416589-27416688    | 99  | 7.13 | 0.373 |
| chr13:112910306-112910394 | 88  | 7.39 | 0.372 |
| chr19:50731746-50731837   | 91  | 7.15 | 0.37  |
| chr4:173350135-173350224  | 89  | 5.1  | 0.37  |
| chr10:46970274-46970295   | 21  | 5.31 | 0.367 |
| chr6:104937437-104937519  | 82  | 4.55 | 0.367 |
| chr9:74578571-74578656    | 85  | 4.28 | 0.367 |
| chrX:118867851-118867941  | 90  | 4.22 | 0.367 |
| chr4:27383045-27383089    | 44  | 4.9  | 0.366 |
| chr10:94834832-94834918   | 86  | 6.69 | 0.364 |
| chr15:83866554-83866644   | 90  | 4.17 | 0.364 |
| chr12:109049468-109049497 | 29  | 6.42 | 0.363 |
| chr12:131258125-131258176 | 51  | 4.01 | 0.357 |
| chr18:54995081-54995108   | 27  | 4.69 | 0.355 |
| chr18:11817745-11817834   | 89  | 5.02 | 0.354 |
| chr2:220180349-220180383  | 34  | 7.18 | 0.353 |
| chr2:70118973-70119053    | 80  | 6.41 | 0.351 |
| chr6:8041964-8042130      | 166 | 6.19 | 0.35  |
| chr5:180641381-180641419  | 38  | 4.86 | 0.35  |
| chr1:43534061-43534216    | 155 | 8.99 | 0.348 |
| chr19:5215290-5215364     | 74  | 4.16 | 0.348 |
| chr4:177475783-177475835  | 52  | 4.7  | 0.345 |
| chr1:17367984-17368028    | 44  | 4.47 | 0.345 |
| chr21:38042410-38042430   | 20  | 5.02 | 0.345 |
| chr4:177613470-177613542  | 72  | 5.96 | 0.343 |
| chr19:42515627-42515699   | 72  | 8.32 | 0.341 |
| chr6:164506665-164506692  | 27  | 4.95 | 0.34  |
| chr11:65236074-65236168   | 94  | 5.92 | 0.34  |
| chr7:96655723-96655817    | 94  | 5.66 | 0.339 |
| chr19:10615299-10615390   | 91  | 5.39 | 0.337 |
| chr19:38346613-38346669   | 56  | 5.39 | 0.336 |
| chr19:47910804-47910890   | 86  | 7.38 | 0.336 |
| chr6:5269463-5269560      | 97  | 4.28 | 0.336 |
| chr19:6319976-6320068     | 92  | 6.39 | 0.335 |
| chr9:94766860-94766892    | 32  | 5.12 | 0.333 |

|                           |     |      |       |
|---------------------------|-----|------|-------|
| chr16:25928144-25928162   | 18  | 5.05 | 0.333 |
| chr16:18214434-18214496   | 62  | 5.26 | 0.332 |
| chr1:45259906-45259997    | 91  | 6.27 | 0.331 |
| chr8:9383902-9383968      | 66  | 5.71 | 0.33  |
| chr12:111450197-111450214 | 17  | 6.99 | 0.33  |
| chr20:46391525-46391613   | 88  | 6.54 | 0.33  |
| chr13:113009134-113009193 | 59  | 4.85 | 0.329 |
| chr12:132692530-132692613 | 83  | 4.42 | 0.328 |
| chr2:33572139-33572179    | 40  | 4.08 | 0.328 |
| chr2:130174667-130174719  | 52  | 4.54 | 0.327 |
| chr7:158166660-158166747  | 87  | 5.19 | 0.326 |
| chr5:180085444-180085533  | 89  | 4.03 | 0.326 |
| chr4:1497765-1497827      | 62  | 4.01 | 0.324 |
| chr15:62516369-62516413   | 44  | 4.81 | 0.323 |
| chr9:137483793-137483891  | 98  | 5.8  | 0.321 |
| chrX:134532692-134532800  | 108 | 5.14 | 0.32  |
| chr14:101542251-101542306 | 55  | 5.87 | 0.32  |
| chr16:572814-572853       | 39  | 5.59 | 0.32  |
| chr14:101017568-101017686 | 118 | 4.84 | 0.319 |
| chr4:655960-656011        | 51  | 4.52 | 0.318 |
| chr5:81731049-81731140    | 91  | 4.02 | 0.318 |
| chr10:8062129-8062221     | 92  | 4.87 | 0.317 |
| chr1:154188343-154188407  | 64  | 4.3  | 0.316 |
| chr15:51715136-51715212   | 76  | 4.59 | 0.316 |
| chr16:29693270-29693345   | 75  | 5.09 | 0.315 |
| chr15:73573657-73573756   | 99  | 5.27 | 0.314 |
| chr18:77543101-77543164   | 63  | 5.73 | 0.314 |
| chr19:10398701-10398777   | 76  | 4.79 | 0.312 |
| chr19:418286-418334       | 48  | 4.67 | 0.312 |
| chr2:97505414-97505464    | 50  | 4.65 | 0.312 |
| chr20:45999342-45999380   | 38  | 4.12 | 0.312 |
| chr1:3432001-3432077      | 76  | 6.66 | 0.312 |
| chr2:92031304-92031398    | 94  | 4.63 | 0.31  |
| chr16:14404717-14404830   | 113 | 4.1  | 0.308 |
| chr7:102223316-102223381  | 65  | 5.32 | 0.308 |
| chr3:139023931-139023958  | 27  | 4.19 | 0.307 |
| chr4:42348276-42348317    | 41  | 4.18 | 0.307 |
| chr11:6291910-6291993     | 83  | 5.62 | 0.306 |
| chr2:240597327-240597441  | 114 | 5.25 | 0.304 |
| chr18:13981582-13981658   | 76  | 4.25 | 0.304 |
| chr1:92406746-92406802    | 56  | 5.19 | 0.303 |

|                           |     |      |       |
|---------------------------|-----|------|-------|
| chr20:61898026-61898085   | 59  | 4.58 | 0.303 |
| chr8:141429251-141429265  | 14  | 4.48 | 0.3   |
| chr8:62033885-62033962    | 77  | 4.16 | 0.3   |
| chr3:55085976-55086021    | 45  | 5.17 | 0.298 |
| chr2:232113242-232113292  | 50  | 4.78 | 0.298 |
| chrX:118528220-118528304  | 84  | 6.83 | 0.297 |
| chr10:1284186-1284243     | 57  | 4.9  | 0.296 |
| chr9:139403687-139403769  | 82  | 7.27 | 0.295 |
| chr8:116049919-116050018  | 99  | 4.97 | 0.293 |
| chr10:1206495-1206556     | 61  | 6.29 | 0.292 |
| chr5:171007376-171007438  | 62  | 4.98 | 0.292 |
| chr6:72596564-72596634    | 70  | 5.59 | 0.291 |
| chr7:4368221-4368273      | 52  | 5.02 | 0.29  |
| chr6:43251562-43251641    | 79  | 4.54 | 0.29  |
| chr12:73683140-73683178   | 38  | 4.51 | 0.29  |
| chr8:8328528-8328746      | 218 | 4.93 | 0.289 |
| chr8:102690433-102690479  | 46  | 4.78 | 0.288 |
| chr16:5459789-5459974     | 185 | 8.24 | 0.288 |
| chr16:88939068-88939081   | 13  | 5.02 | 0.288 |
| chr10:133075050-133075082 | 32  | 4.36 | 0.287 |
| chr18:76978923-76978984   | 61  | 6.34 | 0.285 |
| chr4:138940696-138940772  | 76  | 7    | 0.284 |
| chr1:4045023-4045071      | 48  | 5.82 | 0.284 |
| chr5:134048651-134048715  | 64  | 6.08 | 0.283 |
| chr19:903396-903483       | 87  | 7.74 | 0.282 |
| chr21:43524016-43524071   | 55  | 4.58 | 0.282 |
| chr22:49387225-49387284   | 59  | 4.58 | 0.282 |
| chr3:75656072-75656134    | 62  | 4.16 | 0.282 |
| chr5:19161675-19161751    | 76  | 5.38 | 0.281 |
| chr16:31053695-31053788   | 93  | 7.65 | 0.281 |
| chr17:48585396-48585486   | 90  | 6.14 | 0.281 |
| chr18:12287555-12287624   | 69  | 8.14 | 0.28  |
| chr10:134050444-134050543 | 99  | 7.52 | 0.28  |
| chr12:32325946-32326021   | 75  | 4.04 | 0.28  |
| chr22:37460210-37460318   | 108 | 5.98 | 0.28  |
| chr11:124881292-124881428 | 136 | 5.7  | 0.279 |
| chr17:74524803-74524866   | 63  | 4.8  | 0.279 |
| chr17:76582488-76582585   | 97  | 4.37 | 0.278 |
| chr12:8830955-8831020     | 65  | 4.82 | 0.277 |
| chr2:64870861-64870925    | 64  | 4.21 | 0.277 |
| chr14:105518211-105518301 | 90  | 4.5  | 0.277 |

|                           |     |       |       |
|---------------------------|-----|-------|-------|
| chr7:157959009-157959065  | 56  | 4.16  | 0.276 |
| chr10:37004753-37004792   | 39  | 6.68  | 0.275 |
| chr12:131624147-131624160 | 13  | 6.28  | 0.275 |
| chr2:43216868-43216908    | 40  | 4.29  | 0.275 |
| chr13:112547998-112548072 | 74  | 6.89  | 0.275 |
| chr2:95658953-95659122    | 169 | 6.58  | 0.275 |
| chr3:70236747-70236833    | 86  | 5.69  | 0.274 |
| chrY:7536075-7536146      | 71  | 5.13  | 0.274 |
| chr2:211815699-211815718  | 19  | 5.03  | 0.274 |
| chr15:83890690-83890768   | 78  | 4.98  | 0.274 |
| chr5:3417841-3417906      | 65  | 4.81  | 0.274 |
| chr12:55182455-55182536   | 81  | 4.26  | 0.274 |
| chr4:140693117-140693209  | 92  | 4.41  | 0.273 |
| chr1:2361877-2361968      | 91  | 4.15  | 0.273 |
| chr10:26565558-26565597   | 39  | 5.35  | 0.272 |
| chr8:145925442-145925524  | 82  | 7.32  | 0.271 |
| chr10:133606107-133606129 | 22  | 4.6   | 0.27  |
| chr13:20496711-20496800   | 89  | 4.16  | 0.27  |
| chr16:102720-102760       | 40  | 5.6   | 0.27  |
| chr19:47127190-47127273   | 83  | 8.54  | 0.269 |
| chr21:35303748-35303779   | 31  | 4.41  | 0.268 |
| chr13:31876766-31876828   | 62  | 4.46  | 0.268 |
| chr19:3116280-3116384     | 104 | 7.23  | 0.268 |
| chr7:36232722-36232764    | 42  | 4.32  | 0.268 |
| chrX:92267514-92267610    | 96  | 4.36  | 0.267 |
| chr1:91192434-91192460    | 26  | 4.96  | 0.265 |
| chr22:33577878-33577903   | 25  | 4.35  | 0.265 |
| chr1:6442193-6442389      | 196 | 12.97 | 0.264 |
| chr1:176283361-176283407  | 46  | 4.12  | 0.264 |
| chr10:132576222-132576294 | 72  | 4.94  | 0.263 |
| chrX:48698000-48698018    | 18  | 4.72  | 0.263 |
| chr1:228464099-228464167  | 68  | 7.42  | 0.262 |
| chr16:4640073-4640142     | 69  | 5.93  | 0.262 |
| chr19:46466047-46466094   | 47  | 4.38  | 0.262 |
| chr2:159723858-159723940  | 82  | 4.54  | 0.262 |
| chr11:2113757-2113931     | 174 | 6.18  | 0.262 |
| chr22:21051499-21051581   | 82  | 5.53  | 0.262 |
| chr17:34814900-34814972   | 72  | 4.58  | 0.262 |
| chr1:152285811-152285870  | 59  | 4.13  | 0.261 |
| chr17:39975485-39975678   | 193 | 6.68  | 0.26  |
| chr3:65534583-65534601    | 18  | 6.34  | 0.258 |

|                           |     |      |       |
|---------------------------|-----|------|-------|
| chr18:43173211-43173276   | 65  | 4.44 | 0.258 |
| chr17:26173635-26173698   | 63  | 4.72 | 0.258 |
| chr1:10828176-10828262    | 86  | 4.12 | 0.258 |
| chr17:41402012-41402204   | 192 | 8.41 | 0.258 |
| chr9:871674-871774        | 100 | 4.62 | 0.258 |
| chrX:5147646-5147697      | 51  | 7.11 | 0.257 |
| chr16:64091859-64091899   | 40  | 4.5  | 0.257 |
| chr4:132651420-132651493  | 73  | 4.58 | 0.257 |
| chr8:34951917-34951924    | 7   | 4.35 | 0.256 |
| chr16:87695887-87695926   | 39  | 6.11 | 0.256 |
| chr19:17439909-17440001   | 92  | 8.91 | 0.256 |
| chr4:60924561-60924627    | 66  | 4.44 | 0.255 |
| chrX:136509415-136509493  | 78  | 5.37 | 0.255 |
| chr2:131608690-131608714  | 24  | 4.77 | 0.255 |
| chr3:87737838-87737856    | 18  | 4.51 | 0.255 |
| chr17:72937857-72937902   | 45  | 6.45 | 0.254 |
| chr19:39722203-39722258   | 55  | 4.72 | 0.254 |
| chr1:221320633-221320688  | 55  | 4.29 | 0.254 |
| chrX:136671791-136671809  | 18  | 4.47 | 0.253 |
| chr6:142136206-142136293  | 87  | 5.83 | 0.252 |
| chr5:175617832-175617933  | 101 | 6.58 | 0.252 |
| chr17:33166963-33167056   | 93  | 5    | 0.252 |
| chr14:101158158-101158252 | 94  | 5.75 | 0.252 |
| chr19:15580592-15580649   | 57  | 5.74 | 0.252 |
| chr1:6464493-6464564      | 71  | 7.95 | 0.251 |
| chr6:209787-209857        | 70  | 4.2  | 0.251 |
| chr14:74273503-74273581   | 78  | 4.17 | 0.251 |
| chr10:46186774-46186822   | 48  | 5.75 | 0.25  |
| chr16:75360888-75360982   | 94  | 4.38 | 0.25  |
| chr22:48578967-48579013   | 46  | 4.56 | 0.25  |
| chr5:167023723-167023749  | 26  | 4.32 | 0.25  |
| chr4:7210967-7210986      | 19  | 4.15 | 0.25  |
| chr11:1216365-1216443     | 78  | 4.09 | 0.25  |
| chr8:59313850-59313912    | 62  | 4.96 | 0.249 |
| chr11:2103058-2103112     | 54  | 5.19 | 0.249 |
| chr4:141146052-141146116  | 64  | 6.51 | 0.248 |
| chr4:132671642-132671716  | 74  | 4.88 | 0.248 |
| chr9:112935137-112935213  | 76  | 5.77 | 0.248 |
| chr17:75038124-75038186   | 62  | 4.89 | 0.247 |
| chr18:48255763-48255843   | 80  | 4.4  | 0.247 |
| chr22:49134225-49134280   | 55  | 4.53 | 0.246 |

|                           |     |      |       |
|---------------------------|-----|------|-------|
| chr17:925752-925781       | 29  | 4.28 | 0.246 |
| chrX:153127524-153127609  | 85  | 4.56 | 0.245 |
| chr7:157466910-157466959  | 49  | 4.33 | 0.245 |
| chr1:158205108-158205166  | 58  | 4.1  | 0.245 |
| chr20:43096336-43096397   | 61  | 5.46 | 0.244 |
| chr15:97814454-97814513   | 59  | 5.25 | 0.244 |
| chr17:63859605-63859734   | 129 | 9.69 | 0.244 |
| chr8:143361312-143361400  | 88  | 5.96 | 0.244 |
| chr22:45327146-45327212   | 66  | 4.7  | 0.243 |
| chr12:131929237-131929353 | 116 | 4.09 | 0.243 |
| chr19:56864858-56864909   | 51  | 4.4  | 0.243 |
| chr11:44324978-44325040   | 62  | 4.57 | 0.243 |
| chr12:131614060-131614123 | 63  | 4.05 | 0.242 |
| chr8:120491927-120491967  | 40  | 5.46 | 0.242 |
| chr9:82591894-82591984    | 90  | 4.8  | 0.242 |
| chr3:20353474-20353573    | 99  | 4.49 | 0.242 |
| chr7:18977938-18978000    | 62  | 5.36 | 0.241 |
| chr19:47600931-47601029   | 98  | 5.77 | 0.24  |
| chr11:67496106-67496163   | 57  | 5.58 | 0.24  |
| chr15:65462161-65462260   | 99  | 5.19 | 0.24  |
| chr21:10522554-10522600   | 46  | 4.77 | 0.24  |
| chr12:14861170-14861204   | 34  | 4.26 | 0.24  |
| chr16:10968916-10968971   | 55  | 4.23 | 0.24  |
| chr10:133915784-133915881 | 97  | 4.18 | 0.24  |
| chr16:1270455-1270476     | 21  | 4.1  | 0.24  |
| chr20:47100863-47100918   | 55  | 4.03 | 0.24  |
| chr1:161122762-161122834  | 72  | 6.64 | 0.238 |
| chr11:70676583-70676669   | 86  | 5.07 | 0.238 |
| chr17:7116206-7116300     | 94  | 4.98 | 0.238 |
| chr19:6414448-6414522     | 74  | 4.28 | 0.238 |
| chr21:46072279-46072312   | 33  | 5.01 | 0.237 |
| chr8:145647642-145647674  | 32  | 4.02 | 0.237 |
| chr7:36007074-36007310    | 236 | 4.83 | 0.237 |
| chr8:120177320-120177379  | 59  | 4.33 | 0.237 |
| chrY:16737981-16738038    | 57  | 4.69 | 0.237 |
| chr7:128837502-128837558  | 56  | 4.13 | 0.237 |
| chr19:17346462-17346567   | 105 | 5.93 | 0.236 |
| chr12:101373628-101373754 | 126 | 5.71 | 0.236 |
| chr12:739931-739954       | 23  | 4.7  | 0.236 |
| chr4:165780128-165780179  | 51  | 4.9  | 0.236 |
| chr1:152191065-152191133  | 68  | 5.33 | 0.235 |

|                           |     |      |       |
|---------------------------|-----|------|-------|
| chr22:29704266-29704337   | 71  | 5.07 | 0.235 |
| chr8:15439536-15439612    | 76  | 4.97 | 0.235 |
| chr7:140767534-140767586  | 52  | 4.92 | 0.234 |
| chr3:102152393-102152458  | 65  | 4.57 | 0.234 |
| chr18:49267101-49267181   | 80  | 4.82 | 0.234 |
| chr12:39227480-39227576   | 96  | 4.74 | 0.233 |
| chr9:140762178-140762249  | 71  | 4.84 | 0.232 |
| chr9:79482706-79482730    | 24  | 4.4  | 0.232 |
| chr10:43133977-43134077   | 100 | 4.15 | 0.232 |
| chr1:164079017-164079172  | 155 | 4.83 | 0.232 |
| chr7:68947851-68947899    | 48  | 4.31 | 0.232 |
| chr16:1038281-1038318     | 37  | 6.17 | 0.232 |
| chr7:157778564-157778633  | 69  | 4.3  | 0.231 |
| chr22:43685716-43685804   | 88  | 4.83 | 0.231 |
| chr12:31951316-31951394   | 78  | 4.69 | 0.231 |
| chr11:23675034-23675057   | 23  | 4.73 | 0.23  |
| chr16:67709820-67709903   | 83  | 6.36 | 0.23  |
| chr6:27665001-27665029    | 28  | 4.31 | 0.23  |
| chr22:48845852-48845870   | 18  | 4.29 | 0.23  |
| chr1:158006408-158006456  | 48  | 4.02 | 0.23  |
| chr10:105630607-105630647 | 40  | 5.96 | 0.23  |
| chr1:227982842-227982936  | 94  | 5.63 | 0.23  |
| chr12:1627916-1628021     | 105 | 4.87 | 0.23  |
| chr3:140812858-140812943  | 85  | 4.52 | 0.23  |
| chr6:52156860-52156920    | 60  | 4.07 | 0.23  |
| chr2:213697125-213697223  | 98  | 7.47 | 0.229 |
| chr8:42863824-42863896    | 72  | 5.42 | 0.228 |
| chr5:67113703-67113865    | 162 | 9.06 | 0.228 |
| chr11:69527078-69527166   | 88  | 5.01 | 0.228 |
| chr6:166944381-166944460  | 79  | 4    | 0.228 |
| chr18:27058488-27058585   | 97  | 5.94 | 0.228 |
| chr20:16511156-16511198   | 42  | 4.86 | 0.228 |
| chr19:56679118-56679164   | 46  | 5.48 | 0.227 |
| chr1:145385456-145385640  | 184 | 7.13 | 0.227 |
| chr4:3716947-3717060      | 113 | 5.63 | 0.227 |
| chr9:45449720-45449778    | 58  | 5.51 | 0.227 |
| chr18:12893533-12893626   | 93  | 4.07 | 0.227 |
| chr3:125632701-125632757  | 56  | 5.2  | 0.226 |
| chr14:61527683-61527706   | 23  | 4.03 | 0.226 |
| chr4:180733413-180733460  | 47  | 5.45 | 0.226 |
| chr16:65134495-65134598   | 103 | 4.48 | 0.226 |

|                           |     |      |       |
|---------------------------|-----|------|-------|
| chr1:3275097-3275213      | 116 | 4.7  | 0.226 |
| chr7:44069070-44069130    | 60  | 4.21 | 0.225 |
| chrX:22380759-22380860    | 101 | 4.64 | 0.225 |
| chr10:123353348-123353418 | 70  | 4.25 | 0.225 |
| chr12:132295821-132295902 | 81  | 4.27 | 0.225 |
| chr2:195938094-195938130  | 36  | 4.57 | 0.224 |
| chr9:124414704-124414782  | 78  | 5.52 | 0.223 |
| chr9:140416776-140416843  | 67  | 4.36 | 0.223 |
| chr6:56689074-56689172    | 98  | 4.94 | 0.223 |
| chrY:6134965-6135074      | 109 | 4.62 | 0.223 |
| chr22:25673805-25673880   | 75  | 4.58 | 0.223 |
| chr5:17924717-17924784    | 67  | 4.58 | 0.223 |
| chr21:44602508-44602587   | 79  | 4.59 | 0.223 |
| chrX:147064182-147064229  | 47  | 4.12 | 0.223 |
| chr19:48047944-48048040   | 96  | 5.1  | 0.223 |
| chr2:239931413-239931446  | 33  | 4.3  | 0.223 |
| chr16:28892044-28892109   | 65  | 5.31 | 0.222 |
| chr19:1983313-1983346     | 33  | 4.41 | 0.222 |
| chr12:9410858-9410910     | 52  | 4.29 | 0.222 |
| chr8:125640235-125640386  | 151 | 5.35 | 0.221 |
| chr4:1046931-1047026      | 95  | 4.93 | 0.221 |
| chr1:3350064-3350155      | 91  | 5.48 | 0.22  |
| chr8:20482239-20482313    | 74  | 4.06 | 0.22  |
| chr7:157937049-157937104  | 55  | 5.39 | 0.22  |
| chr12:12566522-12566555   | 33  | 4.61 | 0.22  |
| chr22:20995013-20995069   | 56  | 4.13 | 0.22  |
| chr7:73616404-73616496    | 92  | 4.03 | 0.22  |
| chr15:32314136-32314146   | 10  | 4.17 | 0.22  |
| chr18:70329381-70329472   | 91  | 4.1  | 0.22  |
| chr8:138860765-138860893  | 128 | 5.36 | 0.22  |
| chr1:236269543-236269620  | 77  | 4.22 | 0.219 |
| chr4:5177963-5178011      | 48  | 4.64 | 0.219 |
| chrX:138285520-138285669  | 149 | 6.77 | 0.219 |
| chr1:12566799-12566897    | 98  | 4.82 | 0.218 |
| chr20:60540842-60540919   | 77  | 4.55 | 0.218 |
| chr1:1020685-1020714      | 29  | 4.05 | 0.218 |
| chr16:59566873-59566924   | 51  | 6.34 | 0.217 |
| chr22:38706384-38706473   | 89  | 6.15 | 0.217 |
| chrY:13328685-13328766    | 81  | 5.54 | 0.217 |
| chr15:77925333-77925411   | 78  | 9.18 | 0.217 |
| chr9:77620547-77620625    | 78  | 8.13 | 0.217 |



|                           |     |      |       |
|---------------------------|-----|------|-------|
| chr7:97281238-97281286    | 48  | 4.21 | 0.217 |
| chr15:84560619-84560810   | 191 | 7.64 | 0.216 |
| chr1:196194224-196194300  | 76  | 4.55 | 0.216 |
| chr2:128453128-128453303  | 175 | 8.25 | 0.216 |
| chr14:105531139-105531167 | 28  | 6.25 | 0.216 |
| chrX:73012764-73012840    | 76  | 4.93 | 0.216 |
| chr22:44987350-44987539   | 189 | 4.66 | 0.216 |
| chr14:104394851-104394930 | 79  | 5.11 | 0.216 |
| chr7:111749958-111750050  | 92  | 6.2  | 0.216 |
| chrX:112890205-112890349  | 144 | 4.64 | 0.215 |
| chr19:46966251-46966446   | 195 | 7.14 | 0.215 |
| chr22:20257992-20258058   | 66  | 4.48 | 0.215 |
| chr14:76082086-76082137   | 51  | 4.21 | 0.215 |
| chr8:92562784-92562839    | 55  | 7.1  | 0.215 |
| chr6:30605894-30605950    | 56  | 6.07 | 0.215 |
| chr16:83766980-83767022   | 42  | 5.14 | 0.215 |
| chr16:820830-820913       | 83  | 4.01 | 0.215 |
| chr19:7926857-7926914     | 57  | 5.74 | 0.215 |
| chr19:13617128-13617219   | 91  | 6.93 | 0.215 |
| chr19:58862070-58862118   | 48  | 4.73 | 0.214 |
| chr2:127643777-127643833  | 56  | 5.12 | 0.214 |
| chr3:52837553-52837634    | 81  | 4.39 | 0.214 |
| chr19:4839217-4839316     | 99  | 4.2  | 0.214 |
| chr18:77336437-77336522   | 85  | 5.81 | 0.214 |
| chr16:78472632-78472725   | 93  | 4.9  | 0.214 |
| chr9:33766154-33766219    | 65  | 4.39 | 0.213 |
| chr22:29846274-29846391   | 117 | 4.24 | 0.213 |
| chr13:48893442-48893529   | 87  | 4.58 | 0.213 |
| chr19:17952506-17952592   | 86  | 4.04 | 0.213 |
| chr2:39372073-39372152    | 79  | 4.2  | 0.213 |
| chr8:144963112-144963212  | 100 | 5.48 | 0.213 |
| chr14:72220828-72220941   | 113 | 6.86 | 0.213 |
| chr18:75361106-75361144   | 38  | 5.88 | 0.213 |
| chrX:32603676-32603742    | 66  | 4.14 | 0.213 |
| chr22:33724210-33724305   | 95  | 4.52 | 0.212 |
| chr21:46925769-46925863   | 94  | 5.02 | 0.212 |
| chr2:121119745-121119817  | 72  | 4.64 | 0.212 |
| chrY:9438331-9438404      | 73  | 4.35 | 0.212 |
| chr3:140795794-140795874  | 80  | 4.28 | 0.212 |
| chr17:81039654-81039728   | 74  | 4.26 | 0.212 |
| chr8:15742702-15742766    | 64  | 4.24 | 0.212 |

|                           |     |      |       |
|---------------------------|-----|------|-------|
| chr16:86069740-86069839   | 99  | 4.4  | 0.212 |
| chr3:185094184-185094271  | 87  | 4.4  | 0.212 |
| chr12:57636337-57636376   | 39  | 4.22 | 0.211 |
| chr12:131836957-131837110 | 153 | 5.61 | 0.211 |
| chr5:1594909-1594996      | 87  | 5.04 | 0.211 |
| chr15:98586520-98586598   | 78  | 5.18 | 0.21  |
| chr13:87012876-87012943   | 67  | 4.48 | 0.21  |
| chr16:966361-966401       | 40  | 4.3  | 0.21  |
| chr10:134976631-134976672 | 41  | 5.47 | 0.21  |
| chr17:42461883-42461946   | 63  | 4.62 | 0.21  |
| chr2:126569019-126569067  | 48  | 4.56 | 0.21  |
| chr17:26173367-26173438   | 71  | 4.15 | 0.21  |
| chr8:3097607-3097690      | 83  | 4.01 | 0.21  |
| chr22:43829578-43829667   | 89  | 4.86 | 0.209 |
| chr19:16437495-16437594   | 99  | 4.23 | 0.209 |
| chr3:186530024-186530092  | 68  | 5.04 | 0.209 |
| chr21:43819907-43820023   | 116 | 4.19 | 0.208 |
| chr7:710812-710867        | 55  | 4.54 | 0.208 |
| chr4:64215183-64215246    | 63  | 4.36 | 0.208 |
| chr5:77147541-77147584    | 43  | 4.59 | 0.208 |
| chr5:1522529-1522603      | 74  | 4.26 | 0.208 |
| chr4:683441-683528        | 87  | 4.59 | 0.207 |
| chr2:202370816-202370883  | 67  | 4.42 | 0.207 |
| chr22:17363339-17363435   | 96  | 6.47 | 0.207 |
| chr10:61691752-61691844   | 92  | 4.95 | 0.207 |
| chrX:73756095-73756193    | 98  | 6.06 | 0.206 |
| chr20:62072074-62072173   | 99  | 4.4  | 0.206 |
| chr1:182921849-182921938  | 89  | 7.58 | 0.206 |
| chr10:133058495-133058540 | 45  | 4.93 | 0.205 |
| chr17:40275232-40275318   | 86  | 5.25 | 0.205 |
| chrX:64955212-64955217    | 5   | 5.05 | 0.205 |
| chrX:134570173-134570209  | 36  | 4.66 | 0.205 |
| chr10:104409148-104409213 | 65  | 4.66 | 0.205 |
| chr14:102069926-102069975 | 49  | 4.35 | 0.205 |
| chr1:1874608-1874663      | 55  | 4.11 | 0.205 |
| chr9:116327876-116327936  | 60  | 6.7  | 0.205 |
| chr13:47038028-47038121   | 93  | 4.98 | 0.205 |
| chr7:2158660-2158715      | 55  | 4.72 | 0.205 |
| chr16:87878073-87878167   | 94  | 4.6  | 0.205 |
| chr19:1042226-1042296     | 70  | 4.52 | 0.205 |
| chr7:157224016-157224063  | 47  | 4.11 | 0.205 |

|                           |     |        |        |
|---------------------------|-----|--------|--------|
| chr16:88947745-88947910   | 165 | 6.36   | 0.204  |
| chr9:37007513-37007559    | 46  | 5.24   | 0.204  |
| chr1:176206475-176206527  | 52  | 4.54   | 0.204  |
| chr2:72356139-72356240    | 101 | 4.52   | 0.204  |
| chr13:102712072-102712187 | 115 | 4.4    | 0.204  |
| chrX:53748525-53748568    | 43  | 4.18   | 0.203  |
| chr4:2059051-2059110      | 59  | 5.27   | 0.203  |
| chrX:30716675-30716775    | 100 | 5.23   | 0.203  |
| chr19:16443746-16443841   | 95  | 4.26   | 0.203  |
| chr11:110016870-110016959 | 89  | 5.55   | 0.203  |
| chr17:9088442-9088504     | 62  | 4.34   | 0.203  |
| chr6:98864658-98864726    | 68  | 8.17   | 0.202  |
| chr9:91691813-91691889    | 76  | 5.53   | 0.202  |
| chr17:8601943-8602014     | 71  | 4.95   | 0.202  |
| chr11:1140394-1140469     | 75  | 4.41   | 0.201  |
| chr4:29049426-29049500    | 74  | 4.79   | 0.201  |
| chrX:122964804-122964883  | 79  | 5.64   | 0.2    |
| chr2:241586138-241586192  | 54  | 5.26   | 0.2    |
| chr2:1880366-1880401      | 35  | 4.84   | 0.2    |
| chr18:26979118-26979153   | 35  | 4.6    | 0.2    |
| chr10:46050425-46050480   | 55  | 4.41   | 0.2    |
| chr4:7488051-7488139      | 88  | 4.03   | 0.2    |
| chr6:32313882-32313948    | 66  | -4.36  | -0.2   |
| chr17:74912326-74912354   | 28  | -4.39  | -0.2   |
| chr16:354915-354974       | 59  | -4.64  | -0.2   |
| chr2:237082628-237082707  | 79  | -4.91  | -0.2   |
| chr1:11105721-11105782    | 61  | -5.26  | -0.2   |
| chr19:30020290-30020312   | 22  | -6.28  | -0.2   |
| chr1:228766208-228766294  | 86  | -7.82  | -0.2   |
| chr19:33726654-33726741   | 87  | -5.78  | -0.201 |
| chr18:76766026-76766197   | 171 | -6.33  | -0.201 |
| chr2:176952761-176952836  | 75  | -6.76  | -0.201 |
| chr14:74101032-74101124   | 92  | -8.36  | -0.201 |
| chr6:159360103-159360149  | 46  | -4.37  | -0.202 |
| chr18:76298153-76298247   | 94  | -4.63  | -0.202 |
| chr12:2903462-2903593     | 131 | -5.4   | -0.202 |
| chrX:119445007-119445095  | 88  | -8.76  | -0.202 |
| chr19:38886517-38886750   | 233 | -13.57 | -0.202 |
| chr1:2762625-2762696      | 71  | -4.7   | -0.202 |
| chr5:170516618-170516695  | 77  | -7.4   | -0.202 |
| chr11:797203-797244       | 41  | -4.26  | -0.202 |

|                           |     |       |        |
|---------------------------|-----|-------|--------|
| chr12:2030316-2030331     | 15  | -4.39 | -0.203 |
| chr17:68590991-68591143   | 152 | -5.54 | -0.203 |
| chr12:110207149-110207248 | 99  | -7.49 | -0.203 |
| chr6:126091613-126091759  | 146 | -8.29 | -0.203 |
| chr22:18099743-18099808   | 65  | -4.28 | -0.203 |
| chr8:53610825-53610960    | 135 | -7.5  | -0.203 |
| chr1:41849021-41849106    | 85  | -4.62 | -0.204 |
| chr6:99279482-99279506    | 24  | -4.48 | -0.205 |
| chr7:149411016-149411094  | 78  | -4.75 | -0.205 |
| chr2:10615764-10615834    | 70  | -5.07 | -0.205 |
| chr18:12420081-12420158   | 77  | -5.47 | -0.205 |
| chr2:156981567-156981620  | 53  | -4.05 | -0.205 |
| chr22:38811830-38811904   | 74  | -4.66 | -0.205 |
| chr5:180397403-180397470  | 67  | -5.06 | -0.206 |
| chr3:24136674-24136750    | 76  | -6.53 | -0.206 |
| chr12:74635677-74635772   | 95  | -5.09 | -0.206 |
| chr12:751458-751558       | 100 | -6.37 | -0.206 |
| chr4:66159674-66159750    | 76  | -4.51 | -0.206 |
| chr19:33143312-33143406   | 94  | -4.65 | -0.207 |
| chr19:37797776-37797926   | 150 | -6.3  | -0.207 |
| chr19:16437694-16437763   | 69  | -6.5  | -0.207 |
| chr10:71626578-71626668   | 90  | -4.06 | -0.207 |
| chr13:114785743-114785818 | 75  | -4.51 | -0.207 |
| chr2:240668459-240668515  | 56  | -4.09 | -0.208 |
| chr11:70281192-70281209   | 17  | -4.9  | -0.208 |
| chr7:16542006-16542130    | 124 | -6.68 | -0.208 |
| chr17:171328-171339       | 11  | -4.18 | -0.208 |
| chr7:27252809-27252842    | 33  | -4.62 | -0.208 |
| chr1:157165203-157165304  | 101 | -5.63 | -0.209 |
| chr1:113774581-113774687  | 106 | -4.19 | -0.21  |
| chr2:159519409-159519479  | 70  | -4.03 | -0.21  |
| chr8:11567809-11567891    | 82  | -5.73 | -0.21  |
| chr19:3106131-3106223     | 92  | -5.33 | -0.21  |
| chr16:4377589-4377767     | 178 | -6.1  | -0.21  |
| chr8:179558-179691        | 133 | -8.09 | -0.21  |
| chr7:148636094-148636190  | 96  | -4.69 | -0.211 |
| chr7:57710956-57711041    | 85  | -6.46 | -0.211 |
| chr14:100745121-100745142 | 21  | -4.32 | -0.211 |
| chr1:3056149-3056208      | 59  | -4.73 | -0.211 |
| chr5:153858720-153858925  | 205 | -11.3 | -0.212 |
| chr22:25043024-25043119   | 95  | -4.41 | -0.212 |

|                           |     |       |        |
|---------------------------|-----|-------|--------|
| chr17:42015993-42016069   | 76  | -5.14 | -0.212 |
| chrX:128978174-128978208  | 34  | -5.42 | -0.212 |
| chr20:58508048-58508119   | 71  | -4.19 | -0.212 |
| chr22:46367846-46367901   | 55  | -4.21 | -0.212 |
| chr21:47423079-47423163   | 84  | -4.41 | -0.212 |
| chr20:62049170-62049229   | 59  | -4.76 | -0.212 |
| chr9:126154352-126154442  | 90  | -6.23 | -0.212 |
| chr17:29239095-29239191   | 96  | -7.18 | -0.213 |
| chr4:491392-491452        | 60  | -4.49 | -0.213 |
| chr10:5715840-5715906     | 66  | -4.58 | -0.213 |
| chr2:242004531-242004602  | 71  | -4.61 | -0.213 |
| chr3:142805793-142805827  | 34  | -4.86 | -0.214 |
| chr5:95826959-95827052    | 93  | -4.32 | -0.214 |
| chr3:5372838-5372991      | 153 | -6.24 | -0.214 |
| chr20:61366068-61366173   | 105 | -5.44 | -0.214 |
| chr4:132666938-132667037  | 99  | -5.73 | -0.214 |
| chrX:39987626-39987724    | 98  | -4.02 | -0.215 |
| chr20:44686589-44686644   | 55  | -7.75 | -0.215 |
| chr3:27504843-27504915    | 72  | -4.56 | -0.215 |
| chr5:126070165-126070224  | 59  | -5.94 | -0.216 |
| chr4:2378989-2379041      | 52  | -6.19 | -0.216 |
| chr4:1542408-1542463      | 55  | -4.39 | -0.216 |
| chr9:95546759-95546836    | 77  | -5.26 | -0.216 |
| chr13:48894381-48894475   | 94  | -9.67 | -0.217 |
| chr22:32014109-32014161   | 52  | -4.37 | -0.217 |
| chr2:47313246-47313332    | 86  | -4.75 | -0.217 |
| chr4:7363508-7363515      | 7   | -4.1  | -0.217 |
| chr8:145104261-145104348  | 87  | -9.72 | -0.218 |
| chr20:42218551-42218650   | 99  | -5.02 | -0.218 |
| chr13:71789627-71789681   | 54  | -4.18 | -0.218 |
| chrY:7428197-7428220      | 23  | -4.14 | -0.218 |
| chr12:111618852-111618938 | 86  | -4.49 | -0.219 |
| chr4:74735121-74735228    | 107 | -5.27 | -0.219 |
| chr5:16989622-16989692    | 70  | -4.08 | -0.22  |
| chr17:78322979-78323027   | 48  | -5.35 | -0.22  |
| chr9:95882653-95882716    | 63  | -4.52 | -0.22  |
| chr13:60376900-60376977   | 77  | -4.9  | -0.22  |
| chr8:55016747-55016846    | 99  | -7.56 | -0.22  |
| chr11:134156819-134156912 | 93  | -8.12 | -0.22  |
| chr16:58983996-58984106   | 110 | -6.65 | -0.221 |
| chr14:104179094-104179160 | 66  | -7.88 | -0.221 |

|                           |     |        |        |
|---------------------------|-----|--------|--------|
| chr6:136389590-136389655  | 65  | -4.93  | -0.222 |
| chr12:2113349-2113453     | 104 | -10.23 | -0.222 |
| chr4:31998259-31998425    | 166 | -10.83 | -0.222 |
| chr11:63531207-63531376   | 169 | -6.52  | -0.222 |
| chr6:3428126-3428166      | 40  | -4.19  | -0.222 |
| chr3:125437908-125437964  | 56  | -6.55  | -0.222 |
| chr19:46156234-46156314   | 80  | -6.93  | -0.223 |
| chr18:77659862-77659900   | 38  | -4.12  | -0.224 |
| chr5:172106373-172106426  | 53  | -4.49  | -0.224 |
| chr15:25161255-25161318   | 63  | -4.99  | -0.224 |
| chr11:111169764-111169808 | 44  | -8.5   | -0.224 |
| chr8:10555406-10555488    | 82  | -4.45  | -0.224 |
| chr6:26145894-26146031    | 137 | -5.4   | -0.224 |
| chr4:132647036-132647094  | 58  | -4     | -0.225 |
| chr14:99573968-99574027   | 59  | -4.24  | -0.225 |
| chr10:88703270-88703290   | 20  | -4.78  | -0.225 |
| chr9:138613081-138613182  | 101 | -4.79  | -0.225 |
| chr12:118706667-118706727 | 60  | -5.3   | -0.225 |
| chr21:10597416-10597471   | 55  | -7.74  | -0.226 |
| chr5:111093473-111093564  | 91  | -6.79  | -0.226 |
| chr15:69325339-69325544   | 205 | -6.62  | -0.226 |
| chr11:100322820-100322896 | 76  | -5.48  | -0.227 |
| chr22:50058352-50058437   | 85  | -4.69  | -0.227 |
| chr7:132262340-132262418  | 78  | -7.45  | -0.227 |
| chr3:195916387-195916451  | 64  | -5.46  | -0.227 |
| chr4:83376653-83376708    | 55  | -4.63  | -0.227 |
| chr18:12873566-12873655   | 89  | -5.27  | -0.228 |
| chr2:242710856-242710926  | 70  | -6.95  | -0.228 |
| chr9:133710562-133710609  | 47  | -4.26  | -0.228 |
| chr13:21562306-21562363   | 57  | -4.27  | -0.228 |
| chr8:141108288-141108342  | 54  | -4.3   | -0.228 |
| chrX:9603004-9603111      | 107 | -5.5   | -0.228 |
| chr13:20990209-20990290   | 81  | -5.56  | -0.228 |
| chr12:52676240-52676316   | 76  | -4.16  | -0.229 |
| chrX:49007144-49007202    | 58  | -7.5   | -0.229 |
| chr1:24229143-24229252    | 109 | -4.9   | -0.229 |
| chr2:185490686-185490744  | 58  | -4.19  | -0.23  |
| chr2:241872618-241872674  | 56  | -4.85  | -0.23  |
| chr1:226037742-226037851  | 109 | -4.01  | -0.23  |
| chr7:127233632-127233681  | 49  | -6.1   | -0.23  |
| chr16:9684071-9684123     | 52  | -6.22  | -0.23  |

|                           |     |        |        |
|---------------------------|-----|--------|--------|
| chr11:15095435-15095506   | 71  | -4.6   | -0.23  |
| chr15:22026481-22026509   | 28  | -4.72  | -0.23  |
| chrX:66765349-66765447    | 98  | -6.36  | -0.231 |
| chr19:7923124-7923198     | 74  | -7.63  | -0.231 |
| chr11:363322-363352       | 30  | -4.23  | -0.232 |
| chr9:122132021-122132054  | 33  | -5.04  | -0.232 |
| chr19:15581699-15581835   | 136 | -6.04  | -0.232 |
| chr12:130877510-130877528 | 18  | -4.19  | -0.232 |
| chr12:53660757-53660829   | 72  | -4.53  | -0.234 |
| chr7:101632519-101632618  | 99  | -11.09 | -0.234 |
| chr1:1234491-1234571      | 80  | -4.66  | -0.234 |
| chr6:33500359-33500431    | 72  | -5.5   | -0.234 |
| chr1:201619080-201619121  | 41  | -5.4   | -0.234 |
| chrX:17673436-17673493    | 57  | -5.73  | -0.234 |
| chr11:16996397-16996458   | 61  | -4.55  | -0.235 |
| chr10:2978382-2978422     | 40  | -4.62  | -0.235 |
| chr10:125803652-125803880 | 228 | -6.14  | -0.235 |
| chr18:77659295-77659322   | 27  | -4.55  | -0.236 |
| chr12:122356142-122356456 | 314 | -6.05  | -0.237 |
| chrX:72289646-72289700    | 54  | -4.14  | -0.237 |
| chrY:13585592-13585624    | 32  | -6.72  | -0.237 |
| chr13:98182856-98182952   | 96  | -7.56  | -0.237 |
| chr8:10573937-10574027    | 90  | -4.08  | -0.237 |
| chr6:36635067-36635099    | 32  | -6.84  | -0.237 |
| chr1:228757265-228757351  | 86  | -4.63  | -0.238 |
| chr19:37768302-37768319   | 17  | -5.71  | -0.238 |
| chr8:91411435-91411503    | 68  | -4.52  | -0.238 |
| chr11:2104949-2105001     | 52  | -5.01  | -0.238 |
| chr16:27491241-27491337   | 96  | -6.49  | -0.238 |
| chr22:20709501-20709582   | 81  | -5.95  | -0.238 |
| chr1:2224243-2224339      | 96  | -4.21  | -0.238 |
| chr18:77918009-77918102   | 93  | -5.37  | -0.239 |
| chr4:3287719-3287777      | 58  | -4.19  | -0.24  |
| chrX:135528356-135528424  | 68  | -4.36  | -0.24  |
| chr8:145162956-145163045  | 89  | -5.41  | -0.24  |
| chr14:37048930-37048982   | 52  | -5.54  | -0.24  |
| chr19:56645104-56645231   | 127 | -5.57  | -0.24  |
| chr5:122422342-122422422  | 80  | -4.1   | -0.24  |
| chr1:26651768-26651819    | 51  | -4.19  | -0.24  |
| chr15:37172588-37172679   | 91  | -4.81  | -0.241 |
| chr13:48894733-48894796   | 63  | -4.71  | -0.241 |

|                           |     |       |        |
|---------------------------|-----|-------|--------|
| chr7:157919057-157919107  | 50  | -5.66 | -0.242 |
| chr16:1037383-1037439     | 56  | -4.12 | -0.242 |
| chr1:79825988-79826027    | 39  | -6.13 | -0.242 |
| chr1:180910334-180910403  | 69  | -5.06 | -0.242 |
| chr2:107083717-107083763  | 46  | -4.64 | -0.242 |
| chr11:82044080-82044177   | 97  | -5.41 | -0.242 |
| chr20:55200408-55200506   | 98  | -7.04 | -0.243 |
| chr3:128710429-128710530  | 101 | -6.03 | -0.243 |
| chr22:37171984-37172101   | 117 | -7.62 | -0.244 |
| chr6:1245188-1245248      | 60  | -4.04 | -0.244 |
| chr5:401043-401127        | 84  | -5.42 | -0.244 |
| chr10:134811814-134811889 | 75  | -5.63 | -0.244 |
| chr3:9906503-9906579      | 76  | -5.78 | -0.245 |
| chr4:48059695-48059747    | 52  | -4.53 | -0.245 |
| chr2:73519144-73519155    | 11  | -6.81 | -0.245 |
| chr22:41331906-41332028   | 122 | -4.43 | -0.246 |
| chr13:113640299-113640352 | 53  | -4.03 | -0.246 |
| chr2:233279374-233279446  | 72  | -4.05 | -0.246 |
| chr14:101292535-101292608 | 73  | -4.08 | -0.247 |
| chr13:100310659-100310726 | 67  | -4.69 | -0.247 |
| chr1:6338077-6338173      | 96  | -6.6  | -0.247 |
| chr16:88905057-88905106   | 49  | -4.27 | -0.247 |
| chr13:73673034-73673082   | 48  | -4.95 | -0.248 |
| chr7:592472-592564        | 92  | -4.14 | -0.248 |
| chr13:113763574-113763664 | 90  | -5.23 | -0.248 |
| chr19:16182790-16182889   | 99  | -4.97 | -0.249 |
| chr7:99729303-99729322    | 19  | -6.6  | -0.249 |
| chr8:12654118-12654201    | 83  | -5.86 | -0.249 |
| chr5:66084568-66084642    | 74  | -6.55 | -0.25  |
| chr18:61693372-61693418   | 46  | -4.35 | -0.25  |
| chrY:16636505-16636560    | 55  | -4.8  | -0.25  |
| chr7:158963976-158964000  | 24  | -4.85 | -0.25  |
| chr14:105531179-105531237 | 58  | -5.01 | -0.25  |
| chr6:170055103-170055317  | 214 | -5.37 | -0.25  |
| chr11:124628852-124628906 | 54  | -5.44 | -0.25  |
| chr18:14998207-14998241   | 34  | -4.47 | -0.25  |
| chr2:242491493-242491580  | 87  | -9.35 | -0.25  |
| chr2:11724899-11724998    | 99  | -5.69 | -0.251 |
| chr16:88706290-88706368   | 78  | -7.25 | -0.252 |
| chr10:102974210-102974264 | 54  | -4.34 | -0.252 |
| chr11:96240837-96240932   | 95  | -5.87 | -0.252 |



|                           |     |       |        |
|---------------------------|-----|-------|--------|
| chr9:139265882-139265953  | 71  | -5.99 | -0.252 |
| chr12:120320600-120320647 | 47  | -4.01 | -0.253 |
| chr8:146042932-146042978  | 46  | -4.95 | -0.253 |
| chr8:84606308-84606324    | 16  | -5.24 | -0.253 |
| chr12:70172913-70172989   | 76  | -7.86 | -0.254 |
| chr1:228760703-228760753  | 50  | -4.12 | -0.254 |
| chr8:21647681-21647765    | 84  | -4.63 | -0.254 |
| chr19:39482098-39482188   | 90  | -4.12 | -0.255 |
| chr4:190017589-190017650  | 61  | -4.98 | -0.255 |
| chr17:74524685-74524779   | 94  | -4.68 | -0.256 |
| chr19:55768789-55768848   | 59  | -4.04 | -0.256 |
| chr17:19786572-19786621   | 49  | -5.17 | -0.256 |
| chr5:30346068-30346085    | 17  | -4.15 | -0.257 |
| chr17:80805798-80805872   | 74  | -4.02 | -0.257 |
| chr11:2225362-2225452     | 90  | -4.42 | -0.258 |
| chr17:46663734-46663773   | 39  | -4.7  | -0.258 |
| chr3:191337537-191337611  | 74  | -6.25 | -0.258 |
| chr1:228767426-228767462  | 36  | -4.68 | -0.258 |
| chr7:152440202-152440251  | 49  | -4.95 | -0.258 |
| chr17:161425-161474       | 49  | -5    | -0.258 |
| chr4:185205120-185205186  | 66  | -5.93 | -0.258 |
| chr7:155260316-155260358  | 42  | -5.77 | -0.259 |
| chr5:56275978-56276057    | 79  | -6.41 | -0.259 |
| chr4:49277388-49277451    | 63  | -6.74 | -0.259 |
| chr15:85876171-85876267   | 96  | -6.03 | -0.259 |
| chr7:157918847-157918895  | 48  | -4.48 | -0.26  |
| chr2:75944434-75944533    | 99  | -4.72 | -0.26  |
| chr14:101831657-101831722 | 65  | -6.33 | -0.26  |
| chr14:101640958-101641037 | 79  | -4.12 | -0.26  |
| chr2:135264627-135264697  | 70  | -4.93 | -0.26  |
| chr10:134562112-134562167 | 55  | -5.32 | -0.26  |
| chr8:144629146-144629258  | 112 | -4.56 | -0.26  |
| chr5:177792412-177792511  | 99  | -7.8  | -0.261 |
| chr18:55020698-55020782   | 84  | -5.52 | -0.262 |
| chr22:50002511-50002564   | 53  | -4.71 | -0.262 |
| chr6:147809185-147809203  | 18  | -4.18 | -0.263 |
| chr11:132760611-132760677 | 66  | -4.56 | -0.263 |
| chr10:134186856-134186906 | 50  | -4.6  | -0.263 |
| chr1:10996923-10996995    | 72  | -4.69 | -0.264 |
| chr11:624177-624202       | 25  | -4.32 | -0.265 |
| chr4:8860466-8860516      | 50  | -4.36 | -0.265 |

|                          |     |        |        |
|--------------------------|-----|--------|--------|
| chr9:136595200-136595269 | 69  | -4.55  | -0.265 |
| chr19:56160420-56160489  | 69  | -4.57  | -0.266 |
| chr16:33278075-33278165  | 90  | -7.14  | -0.266 |
| chr17:16355328-16355346  | 18  | -7.94  | -0.266 |
| chr6:50817733-50817804   | 71  | -6.69  | -0.266 |
| chr19:10024593-10024745  | 152 | -7.36  | -0.267 |
| chr16:2974145-2974248    | 103 | -6.28  | -0.267 |
| chr15:68119374-68119402  | 28  | -4.23  | -0.268 |
| chr6:150311604-150311623 | 19  | -7.68  | -0.268 |
| chr10:2037075-2037142    | 67  | -4.15  | -0.268 |
| chr9:115841164-115841222 | 58  | -4.88  | -0.268 |
| chr1:181382489-181382510 | 21  | -4.94  | -0.268 |
| chr4:174427944-174428018 | 74  | -4.49  | -0.268 |
| chr9:72425288-72425506   | 218 | -11.07 | -0.27  |
| chr17:75207237-75207302  | 65  | -5.01  | -0.27  |
| chrX:99664110-99664159   | 49  | -4.02  | -0.271 |
| chrX:150863906-150863976 | 70  | -4.52  | -0.272 |
| chr2:233274507-233274524 | 17  | -4.77  | -0.272 |
| chr8:11317998-11318046   | 48  | -4.63  | -0.272 |
| chr16:88307643-88307699  | 56  | -5.37  | -0.272 |
| chr4:3311068-3311140     | 72  | -7.01  | -0.272 |
| chr7:7504862-7505029     | 167 | -7.37  | -0.274 |
| chrX:50172410-50172510   | 100 | -6.51  | -0.274 |
| chrX:49013728-49013814   | 86  | -6.92  | -0.274 |
| chr18:61772414-61772470  | 56  | -7.85  | -0.276 |
| chr13:43540198-43540276  | 78  | -4.41  | -0.277 |
| chr9:101570657-101570735 | 78  | -4.05  | -0.277 |
| chr19:609067-609128      | 61  | -6.12  | -0.278 |
| chr14:30833046-30833120  | 74  | -6.36  | -0.279 |
| chr9:21970961-21971053   | 92  | -6.82  | -0.279 |
| chr19:39210089-39210190  | 101 | -6.11  | -0.28  |
| chr4:132959700-132959746 | 46  | -4.02  | -0.28  |
| chr12:7303227-7303279    | 52  | -4.16  | -0.28  |
| chr17:56410603-56410661  | 58  | -5.27  | -0.28  |
| chr6:20024251-20024320   | 69  | -6.68  | -0.28  |
| chrX:105960152-105960220 | 68  | -4.72  | -0.282 |
| chr8:115896592-115896654 | 62  | -5.15  | -0.282 |
| chr7:4901698-4901799     | 101 | -5.54  | -0.282 |
| chr6:45608689-45608781   | 92  | -4.89  | -0.283 |
| chr19:22234651-22234697  | 46  | -4.37  | -0.284 |
| chr2:148927686-148927756 | 70  | -5.29  | -0.285 |

|                           |     |       |        |
|---------------------------|-----|-------|--------|
| chr7:203936-203965        | 29  | -4.06 | -0.285 |
| chr17:17713758-17713839   | 81  | -4.26 | -0.286 |
| chr19:1806747-1806788     | 41  | -5.31 | -0.286 |
| chr20:31148748-31148849   | 101 | -7.06 | -0.287 |
| chr11:131243493-131243549 | 56  | -4.88 | -0.287 |
| chr2:1480990-1481015      | 25  | -4.16 | -0.288 |
| chrX:71307774-71307851    | 77  | -4.88 | -0.288 |
| chr4:26806178-26806232    | 54  | -5.44 | -0.288 |
| chr11:875835-875915       | 80  | -5.26 | -0.29  |
| chr10:77165442-77165465   | 23  | -4.48 | -0.29  |
| chr1:10700023-10700097    | 74  | -8.57 | -0.29  |
| chr17:5019466-5019563     | 97  | -5.24 | -0.291 |
| chrX:70712253-70712349    | 96  | -6.44 | -0.291 |
| chr4:132673816-132673858  | 42  | -5.21 | -0.292 |
| chr2:113246054-113246132  | 78  | -6.58 | -0.292 |
| chr20:60781198-60781289   | 91  | -4.06 | -0.294 |
| chr16:57789121-57789169   | 48  | -4.72 | -0.295 |
| chr12:133160089-133160241 | 152 | -9.55 | -0.296 |
| chr9:125677191-125677271  | 80  | -4.16 | -0.296 |
| chr1:15925497-15925554    | 57  | -8.16 | -0.297 |
| chr18:12777511-12777592   | 81  | -4.79 | -0.298 |
| chr13:66418762-66418830   | 68  | -4.98 | -0.298 |
| chr14:96362463-96362532   | 69  | -4.95 | -0.3   |
| chr9:136522302-136522344  | 42  | -6.36 | -0.3   |
| chr3:197282714-197282828  | 114 | -6.37 | -0.301 |
| chr4:184430838-184430935  | 97  | -4.21 | -0.302 |
| chr12:132865349-132865370 | 21  | -4.26 | -0.302 |
| chr11:48875103-48875174   | 71  | -5.61 | -0.302 |
| chrX:117666507-117666539  | 32  | -4.22 | -0.302 |
| chr3:75174661-75174705    | 44  | -6    | -0.302 |
| chr3:127634117-127634202  | 85  | -7.79 | -0.303 |
| chr11:2109591-2109665     | 74  | -5.26 | -0.304 |
| chr22:46913295-46913360   | 65  | -4.11 | -0.305 |
| chr15:77311989-77312096   | 107 | -5.8  | -0.307 |
| chr8:1444440-1444481      | 41  | -4.98 | -0.308 |
| chr11:95169609-95169685   | 76  | -6.07 | -0.309 |
| chr20:62406579-62406668   | 89  | -5    | -0.309 |
| chr4:72223751-72223813    | 62  | -4.06 | -0.312 |
| chr18:60263389-60263463   | 74  | -6.6  | -0.312 |
| chr5:124700420-124700476  | 56  | -5.61 | -0.313 |
| chr6:39271536-39271541    | 5   | -5.19 | -0.318 |

|                           |     |        |        |
|---------------------------|-----|--------|--------|
| chr1:16440823-16440920    | 97  | -5.47  | -0.318 |
| chr10:6254147-6254245     | 98  | -6.33  | -0.319 |
| chr19:3097121-3097172     | 51  | -4.82  | -0.32  |
| chr7:1066895-1066990      | 95  | -5.05  | -0.325 |
| chr17:79026172-79026262   | 90  | -7.22  | -0.325 |
| chr14:37052377-37052552   | 175 | -4.87  | -0.326 |
| chrY:9745309-9745436      | 127 | -5.69  | -0.326 |
| chr10:134041441-134041506 | 65  | -7.18  | -0.328 |
| chrX:72601049-72601113    | 64  | -4.4   | -0.328 |
| chr4:48908539-48908647    | 108 | -13.29 | -0.328 |
| chr5:154318168-154318224  | 56  | -4.95  | -0.33  |
| chr10:131766125-131766191 | 66  | -4.06  | -0.33  |
| chr20:36050097-36050169   | 72  | -4.9   | -0.33  |
| chrY:8008215-8008286      | 71  | -6.93  | -0.33  |
| chr20:44686407-44686494   | 87  | -10.39 | -0.33  |
| chr12:113059229-113059305 | 76  | -5.8   | -0.331 |
| chr13:97600059-97600142   | 83  | -5.28  | -0.332 |
| chr17:79400998-79401097   | 99  | -4.7   | -0.333 |
| chrX:100872284-100872340  | 56  | -4.26  | -0.333 |
| chr19:44278301-44278399   | 98  | -10.06 | -0.334 |
| chr15:66792851-66792902   | 51  | -5.69  | -0.335 |
| chr1:53762187-53762199    | 12  | -4.33  | -0.338 |
| chr13:46219420-46219472   | 52  | -4.37  | -0.34  |
| chrX:47662568-47662605    | 37  | -4.58  | -0.34  |
| chrY:13370804-13370822    | 18  | -5.24  | -0.34  |
| chr18:11614354-11614375   | 21  | -5.64  | -0.34  |
| chr10:123922715-123922789 | 74  | -7.84  | -0.34  |
| chr15:49184252-49184348   | 96  | -6.02  | -0.343 |
| chrX:96567901-96567959    | 58  | -4.38  | -0.345 |
| chr4:1580071-1580141      | 70  | -4.61  | -0.347 |
| chr7:156798169-156798265  | 96  | -11.05 | -0.347 |
| chr5:220791-220828        | 37  | -5.96  | -0.347 |
| chr20:62173600-62173678   | 78  | -5.74  | -0.349 |
| chrY:23838502-23838602    | 100 | -7.53  | -0.349 |
| chr9:139659037-139659080  | 43  | -5.51  | -0.35  |
| chr16:981326-981382       | 56  | -5.93  | -0.35  |
| chr19:15343610-15343683   | 73  | -6     | -0.352 |
| chr5:155107503-155107529  | 26  | -4.98  | -0.355 |
| chr22:45412758-45412763   | 5   | -6.43  | -0.355 |
| chr19:1254122-1254191     | 69  | -6.99  | -0.358 |
| chr9:133794200-133794260  | 60  | -4.74  | -0.36  |

|                           |     |        |        |
|---------------------------|-----|--------|--------|
| chr1:228581252-228581337  | 85  | -5     | -0.36  |
| chr1:66016483-66016551    | 68  | -6     | -0.366 |
| chr6:27107313-27107373    | 60  | -7.21  | -0.366 |
| chr16:2229009-2229109     | 100 | -14.43 | -0.367 |
| chr7:1328889-1329000      | 111 | -6.52  | -0.371 |
| chr10:83635647-83635721   | 74  | -5.33  | -0.371 |
| chr3:144867219-144867285  | 66  | -5.74  | -0.372 |
| chr1:154958714-154958786  | 72  | -4.41  | -0.376 |
| chr14:32031831-32031903   | 72  | -6.83  | -0.38  |
| chr2:11515107-11515206    | 99  | -7.9   | -0.381 |
| chr1:228756258-228756316  | 58  | -8.56  | -0.384 |
| chr17:19795116-19795167   | 51  | -4.55  | -0.39  |
| chr7:906869-906968        | 99  | -4.59  | -0.39  |
| chr16:1262543-1262618     | 75  | -6.77  | -0.39  |
| chr21:29535282-29535294   | 12  | -5.03  | -0.39  |
| chr5:126244765-126244866  | 101 | -5.86  | -0.39  |
| chr12:125783403-125783437 | 34  | -6     | -0.398 |
| chr11:116976110-116976182 | 72  | -4.14  | -0.4   |
| chr4:190905498-190905531  | 33  | -5.55  | -0.4   |
| chr12:125313008-125313082 | 74  | -8.5   | -0.4   |
| chr19:46526224-46526367   | 143 | -6.51  | -0.401 |
| chr1:1479142-1479193      | 51  | -6.22  | -0.402 |
| chr4:112543373-112543435  | 62  | -4.03  | -0.402 |
| chr17:59532041-59532149   | 108 | -9.3   | -0.411 |
| chr6:64170948-64171016    | 68  | -7.7   | -0.42  |
| chrX:43431782-43431959    | 177 | -9.63  | -0.424 |
| chr2:83995677-83995721    | 44  | -5.31  | -0.426 |
| chr6:160582506-160582603  | 97  | -5.57  | -0.428 |
| chr9:101366333-101366417  | 84  | -6.7   | -0.432 |
| chr17:12358943-12359019   | 76  | -5.31  | -0.434 |
| chr1:150693283-150693303  | 20  | -5.31  | -0.44  |
| chr11:109294665-109294748 | 83  | -9.13  | -0.443 |
| chr18:12777267-12777335   | 68  | -7.37  | -0.444 |
| chr3:69061828-69061864    | 36  | -4.03  | -0.455 |
| chr1:175941759-175941853  | 94  | -5.23  | -0.455 |
| chr8:876823-876900        | 77  | -5.16  | -0.457 |
| chr3:192127390-192127480  | 90  | -12.12 | -0.481 |
| chrX:100914569-100914642  | 73  | -5.86  | -0.484 |
| chr8:143262198-143262233  | 35  | -5.23  | -0.497 |
| chr13:52849509-52849544   | 35  | -7.35  | -0.497 |
| chr8:99960164-99960244    | 80  | -9.02  | -0.505 |

|                         |    |        |        |
|-------------------------|----|--------|--------|
| chr21:24401702-24401753 | 51 | -5.47  | -0.518 |
| chr19:34304072-34304145 | 73 | -6     | -0.52  |
| chr13:42999117-42999198 | 81 | -4.34  | -0.53  |
| chr3:65534684-65534778  | 94 | -13.53 | -0.558 |
| chr12:53302031-53302096 | 65 | -7.34  | -0.568 |
| chr17:8868667-8868688   | 21 | -7.17  | -0.595 |

**associated\_gene(s)**

DNM2(NM\_001005361),DNM2(NM\_001190716),DNM2(NM\_001005360),DNM2(NM\_001005360),  
CARD11(NM\_032415),

LRRC69(NM\_001129890),

ATP9A(NM\_006045),

GUCY2F(NM\_001522),

CD28(NM\_001243078),CD28(NM\_006139),CD28(NM\_001243077),  
NCAPD2(NM\_014865),

POTEG(pmt,NM\_001005356),POTEG(pmt,NR\_027480),

ZFAND3(NM\_021943),

GPR123(NM\_001083909),

MID1(NM\_033290),

PDE9A(NM\_001001578),PDE9A(NM\_001001579),PDE9A(NM\_001001585),PDE9A(NM\_001001585),  
DGKE(NM\_003647),

ALG1L9P(NR\_073386),FAM86C1(NM\_001099653),ALG1L9P(NR\_073388),FAM86C1(NM\_15256),  
CACNA1H(NM\_021098),CACNA1H(NM\_001005407),  
OSBPL1A(NM\_080597),

AKAP14(NM\_001008534),AKAP14(NM\_178813),AKAP14(NM\_001008535),  
NID1(NM\_002508),  
CASC5(NM\_144508),CASC5(NM\_170589),

RGS22(NM\_001286692),RGS22(pmt,NM\_001286693),RGS22(NM\_015668),  
MIR1256(NR\_031657),MICU1(NM\_001195518),MICU1(NM\_006077),

IL10(NM\_000572),

MYH14(NM\_024729),MYH14(NM\_001077186),MYH14(NM\_001145809),  
GALNTL6(NM\_001034845),  
SYT15(NM\_031912),SYT15(NM\_181519),

C9orf85(NM\_182505),

CYP26A1(NM\_057157),CYP26A1(NM\_000783),  
HDGFRP3(NM\_016073),  
CORO1C(NM\_014325),CORO1C(NM\_001276471),CORO1C(NM\_001105237),

GNAL(NM\_001142339),GNAL(NM\_001261443),GNAL(NM\_182978),

SNRNP27(pmt,NR\_037862),SNRNP27(pmt,NM\_006857),  
BLOC1S5-TXNDC5(NR\_037616),BLOC1S5(NM\_201280),EEF1E1-BLOC1S5(NR\_037618),BLOC1S5

PTPRS(NM\_130853),PTPRS(NM\_002850),PTPRS(NM\_130854),PTPRS(NM\_130855),

SDHB(NM\_003000),

VEGFC(NM\_005429),  
GRIK5(NM\_002088),

DLX5(pmt,NM\_005221),  
KEAP1(pmt,NM\_012289),KEAP1(pmt,NM\_203500),  
LOC100631378(pmt,NR\_040015),  
MEIS3(NM\_020160),MEIS3(NM\_001009813),  
FARS2(NM\_006567),  
ACER1(NM\_133492),



HS3ST4(NM\_006040),

SULF2(NM\_198596),SULF2(NM\_018837),SULF2(NM\_001161841),

GALNT9(pmt,NM\_021808),GALNT9(NM\_001122636),  
LTBP1(NM\_206943),LTBP1(NM\_001166266),LTBP1(NM\_001166264),LTBP1(NM\_001166265),I

PTPRN2(NM\_130842),PTPRN2(NM\_130843),PTPRN2(NM\_002847),

BEGAIN(NM\_001159531),BEGAIN(NM\_020836),  
PDE6B(NM\_001145292),PDE6B(NM\_001145291),PDE6B(NM\_000283),

UBAP2L(pmt,NM\_001127320),C1orf43(NM\_015449),UBAP2L(pmt,NM\_001287815),C1orf43(N

QPRT(NM\_014298),  
NEO1(NM\_001172623),NEO1(NM\_002499),NEO1(NM\_001172624),

ICAM5(pmt,NM\_003259),ICAM4(NM\_022377),ICAM4(NM\_001544),ICAM4(NM\_001039132),  
SHC2(NM\_012435),  
ANKRD23(NM\_144994),

MEGF6(NM\_001409),

RASA4B(NM\_001277335),RASA4(NM\_001079877),RASA4(NM\_006989),

CCKBR(NM\_176875),

TRAPPC9(NM\_031466),TRAPPC9(NM\_001160372),

CACNA2D3(NM\_018398),  
ARMC9(NM\_001291656),ARMC9(NM\_025139),ARMC9(NM\_001271466),  
SLC25A43(pmt,NM\_145305),  
ADARB2(NM\_018702),  
NOTCH1(NM\_017617),

LINC00200(NR\_015376),

RIMS1(NM\_014989),

TTBK1(NM\_032538),

TCERG1L(NM\_174937),  
ATP9B(NM\_198531),

SEC24A(NM\_021982),  
R3HDM4(NM\_138774),  
UMODL1(NM\_001199528),UMODL1(NM\_001004416),UMODL1(NM\_173568),UMODL1(NM\_0

MYCBPAP(pmt,NM\_032133),

STK32C(NM\_173575),  
BICD1(NM\_001714),BICD1(NM\_001003398),

CCDC15(NM\_025004),  
PRCD(NR\_033357),CYGB(NM\_134268),

SERTAD2(NM\_014755),  
GPR132(NM\_001278694),GPR132(NM\_001278695),GPR132(NM\_013345),GPR132(NM\_00127

PTPRN2(NM\_130842),PTPRN2(NM\_130843),PTPRN2(NM\_002847),

GPR133(NM\_198827),

LINC01019(NR\_033898),

MAML3(NM\_018717),

GAD2(NM\_000818),GAD2(NM\_001134366),

LINC01164(NR\_038365),

POLR3K(NM\_016310),SNRNP25(pmt,NM\_024571),

PTGIR(NM\_000960),

LINC00649(NR\_038883),

B3GALTL(NM\_194318),

GNA11(NM\_002067),

EEPD1(NM\_030636),

ACOT7(NM\_181864),ACOT7(NM\_007274),

PCSK1N(pmt,NM\_013271),

OBSCN(NM\_001098623),OBSCN(NM\_001271223),OBSCN(NM\_052843),

C16orf96(NM\_001145011),

NOVA2(NM\_002516),

TMEM191A(pmt,NR\_026815),

FLG-AS1(pmt,NR\_103778),FLG(NM\_002016),

FKBP10(NM\_021939),

MAGI1(NM\_001033057),MAGI1(NM\_015520),MAGI1(NM\_004742),

SLC14A2(NM\_001242692),

CASZ1(NM\_017766),CASZ1(NM\_001079843),

DMRT1(NM\_021951),

JPH3(NM\_020655),JPH3(NR\_073379),

ANO8(NM\_020959),

OTOP3(NM\_001272005),OTOP3(NM\_178233),

LOC643201(NR\_036494),

PGLYRP2(NM\_052890),

CFDP1(NM\_006324),

TENM2(NM\_001122679),

SORCS2(NM\_020777),

MAPK4(NM\_002747),

FAM19A5(NM\_001082967),FAM19A5(NM\_015381),

ABR(NM\_001159746),ABR(NM\_021962),ABR(NM\_001092),ABR(NM\_001256847),ABR(NM\_001278116),L1CAM(NM\_000425),L1CAM(NM\_024003),L1CAM(NM\_001143963),L1CAM(NM\_001278116),PTPRN2(NM\_130842),PTPRN2(NM\_130843),PTPRN2(NM\_002847),

C20orf62(pmt,NM\_001287807),

CEP112(NM\_145036),CEP112(NM\_001199165),TSNARE1(NM\_145003),PHF21B(NM\_001135862),PHF21B(NM\_001242450),PHF21B(NM\_001284296),PHF21B(NM\_130842),

ALX4(NM\_021926),GPR133(NM\_198827),

HDAC9(NM\_058176),HDAC9(NM\_178425),HDAC9(NM\_178423),ZC3H4(NM\_015168),

CLPX(NM\_006660),

CIITA(pmt,NR\_104444),CIITA(pmt,NM\_001286402),CIITA(pmt,NM\_000246),CIITA(pmt,NM\_001286402),JAKMIP3(pmt,NM\_001105521),CACNA1H(NM\_021098),CACNA1H(NM\_001005407),

UFC1(pmt,NM\_016406),SHANK2(NM\_012309),ACADVL(pmt,NM\_001270447),DLG4(NM\_001365),DLG4(NM\_001128827),KHSRP(NM\_003685),TSPEAR(NM\_144991),TSPEAR(NM\_001272037),

NLGN4Y(NM\_014893),NLGN4Y(NR\_028319),NLGN4Y(NR\_046355),NLGN4Y(NM\_001206850),NTRK3(NM\_005631),NR2F6(NM\_005234),ANO4(NM\_001286615),ANO4(NM\_001286616),ANO4(NM\_178826),NINJ2(NM\_016533),

HRNR(NM\_001009931),

GAS2L1(NM\_006478),GAS2L1(NM\_001278730),GAS2L1(NM\_152236),  
TUSC3(NM\_178234),TUSC3(NM\_006765),

ZPLD1(pmt,NM\_175056),

CPNE8(NM\_153634),

PRUNE2(NM\_015225),  
ZNF33B(pmt,NM\_006955),

PTPRN2(NM\_130842),PTPRN2(NM\_130843),PTPRN2(NM\_002847),  
SCUBE1(NM\_173050),

GFOD2(NR\_027398),GFOD2(NM\_030819),  
LINC01012(NR\_038293),LINC01012(NR\_038292),LINC01012(NR\_038294),

KIRREL(NM\_001286349),KIRREL(NM\_018240),

SPSB4(NM\_080862),

HOOK3(NM\_032410),

RPS6KA2(NM\_001006932),RPS6KA2(NM\_021135),

KIF16B(NM\_024704),KIF16B(NM\_001199866),KIF16B(NM\_001199865),

NBPF20(NM\_001278267),NBPF10(NM\_001039703),

FAM86JP(pmt,NR\_024251),FAM86JP(pmt,NR\_024250),  
SLC38A6(NM\_001172702),SLC38A6(NR\_033344),

CDH11(NM\_001797),

PRDM16(NM\_022114),PRDM16(NM\_199454),  
RASA4CP(NR\_024116),  
PTCHD1-AS(NR\_073010),  
FGFR2(NM\_001144917),FGFR2(NM\_001144913),FGFR2(NR\_073009),FGFR2(NM\_023029),FGF

DAB2IP(NM\_032552),  
PNPLA7(NM\_001098537),PNPLA7(NM\_152286),  
DST(NM\_001144769),DST(NM\_183380),DST(NM\_001144770),

FMR1NB(NM\_152578),  
ZNF541(NM\_001277075),

ATP2A1(NM\_004320),ATP2A1(NM\_173201),LOC100289092(pmt,NR\_046287),ATP2A1(NM\_00

MTSS1(NM\_001282974),MTSS1(NM\_001282971),MTSS1(NM\_014751),

PRDM16(NM\_022114),PRDM16(NM\_199454),

PTPRN2(NM\_130842),PTPRN2(NM\_130843),PTPRN2(NM\_002847),  
LOH12CR1(NM\_058169),

STK32B(NM\_018401),  
FGF13(NM\_001139500),FGF13(NM\_001139498),FGF13(NM\_001139501),  
VPS13D(NM\_018156),SNORA59A(pmt,NR\_003025),SNORA59B(pmt,NR\_003022),VPS13D(NM\_

C1orf159(NM\_017891),

CSNK1E(NM\_152221),CSNK1E(NM\_001894),CSNK1E(NM\_001289912),

LINGO1(pmt,NM\_032808),  
C9orf41(NM\_152420),

ADAMTSL3(NM\_207517),

GPR132(NM\_001278694),GPR132(NM\_001278695),GPR132(NM\_013345),GPR132(NM\_001278695),  
TSIX(NR\_003255),

TDRD9(NM\_153046),  
DOCK4(NM\_014705),

RTN4R(pmt,NM\_023004),  
FLVCR2(NM\_017791),FLVCR2(NM\_001195283),

ATAT1(NM\_024909),ATAT1(NM\_001254952),ATAT1(NM\_001031722),  
CDH13(NM\_001220488),CDH13(NM\_001220490),CDH13(NM\_001257),CDH13(NM\_001220488)

EVI5L(NM\_145245),EVI5L(NM\_001159944),  
CACNA1A(NM\_001174080),CACNA1A(NM\_001127221),CACNA1A(NM\_000068),CACNA1A(NM\_001174080),  
A1BG-AS1(pmt,NR\_015380),A1BG(NM\_130786),

ITIH3(NM\_002217),  
PLIN3(NM\_001164189),PLIN3(NM\_001164194),PLIN3(NM\_005817),

WWOX(NM\_016373),  
PRSS3(NM\_001197098),PRSS3(NM\_001197097),PRSS3(NM\_007343),

RB1(NM\_000321),  
JAK3(NM\_000215),

DMD(NM\_000109),DMD(NM\_004006),DMD(NM\_004010),DMD(NM\_004009),  
LARGE(NM\_004737),LARGE(NM\_133642),  
COL18A1(NM\_030582),COL18A1(NM\_130445),

SPSB4(NM\_080862),  
METRNL(NM\_001004431),



MAP3K13(NM\_004721),MAP3K13(NM\_001242317),MAP3K13(NM\_001242314),  
NDUFA4L2(pmt,NM\_020142),  
LOC338797(NR\_103736),  
SDHAP3(pmt,NR\_003263),

LOC101929387(pmt,NR\_110946),LOC101929387(pmt,NR\_110945),LMF1(NM\_022773),LMF1(NM\_022773),  
KNDC1(NM\_152643),  
ITGA2B(NM\_000419),

CSMD1(NM\_033225),  
MPPED1(NM\_001044370),  
KLF2(NM\_016270),

UBASH3A(pmt,NM\_001001895),TMPRSS3(pmt,NM\_024022),TMPRSS3(pmt,NR\_046020),TMPI  
PRKAR1B(NM\_002735),PRKAR1B(NM\_001164760),PRKAR1B(NM\_001164762),PRKAR1B(NM\_001164762),

LPCAT1(NM\_024830),  
MFSD7(pmt,NM\_032219),  
ALS2CR11(NM\_001168216),ALS2CR11(NM\_152525),ALS2CR11(NM\_001168221),

KCNQ2(NM\_172108),KCNQ2(NM\_004518),KCNQ2(NM\_172106),KCNQ2(NM\_172107),KCNQ2(NM\_172107),  
SHCBP1L(NM\_030933),  
TCERG1L(NM\_174937),  
HSPB9(NM\_033194),KAT2A(pmt,NM\_021078),  
MSN(NM\_002444),

TRIM8(NM\_030912),

RGS3(NM\_130795),RGS3(NM\_144488),RGS3(NM\_001282923),RGS3(NM\_134427),RGS3(NM\_134427),

MAD1L1(NM\_001013837),MAD1L1(NM\_003550),MAD1L1(NM\_001013836),  
SLC7A5(NM\_003486),  
ABCA7(NM\_019112),

CBFA2T3(NM\_005187),CBFA2T3(NM\_175931),  
PAX5(NM\_001280549),PAX5(NM\_001280548),PAX5(NM\_001280555),PAX5(NM\_001280547),

FGF14(NM\_175929),

NAT8L(pmt,NM\_178557),  
GK(NM\_001128127),GK(NM\_203391),GK(NM\_001205019),GK(NM\_000167),

ZC3H12C(NM\_033390),  
NTN1(NM\_004822),

SHC3(NM\_016848),

MYT1L(NM\_015025),

MARCH8(NM\_145021),  
SORCS2(NM\_020777),  
C6orf10(NM\_006781),C6orf10(NM\_001286475),C6orf10(NM\_001286474),  
MGAT5B(NM\_144677),MGAT5B(NM\_198955),MGAT5B(NM\_001199172),  
AXIN1(NM\_003502),AXIN1(NM\_181050),

MASP2(NM\_139208),MASP2(NM\_006610),  
VSTM2B(NM\_001146339),LOC284395(pmt,NR\_040029),

HOXD13(pmt,NM\_000523),EVX2(pmt,NM\_001080458),

FKBP4(pmt,NM\_002014),  
TMEM255A(NM\_001104544),TMEM255A(NM\_001104545),TMEM255A(NM\_017938),  
SPRED3(NM\_001042522),SPRED3(NR\_073032),

RANBP17(NM\_022897),  
SLC25A22(pmt,NM\_024698),SLC25A22(NM\_001191061),SLC25A22(NM\_001191060),

CACNA2D4(pmt,NM\_172364),

FAM222A-AS1(NR\_026661),FAM222A-AS1(NR\_026662),FAM222A(NM\_032829),

ATP6V1E1(NM\_001039367),ATP6V1E1(NM\_001039366),ATP6V1E1(NM\_001696),

RB1CC1(NM\_001083617),RB1CC1(NM\_014781),

FOXO6(NM\_001291281),

POU3F2(pmt,NM\_005604),

KRBA1(pmt,NM\_032534),KRBA1(pmt,NM\_001290187),

SLMO1(NM\_001142405),SLMO1(NM\_006553),

AC093375.1(NR\_110249),AC093375.1(NR\_110250),

LOC100507377(NR\_038300),

NINJ2(NM\_016533),

ANKRD27(NM\_032139),

KLF2(NM\_016270),

COL13A1(NM\_080800),COL13A1(NM\_080801),COL13A1(NM\_001130103),COL13A1(NM\_0808

RASA3(NM\_007368),

CTTN(NM\_001184740),CTTN(NM\_005231),CTTN(NM\_138565),

RPH3AL(NM\_006987),RPH3AL(NM\_001190412),RPH3AL(NM\_001190413),RPH3AL(NM\_00119

PKP4(NM\_003628),PKP4(NM\_001005476),

GATA4(NM\_002052),

GNA11(NM\_002067),

GLIS2(pmt,NM\_032575),LOC101926896(NR\_110901),

ZNF596(pmt,NM\_001287254),ZNF596(pmt,NM\_001287255),ZNF596(pmt,NM\_001042415),ZN

YY1(NM\_003403),

PRDM16(NM\_022114),PRDM16(NM\_199454),

HAND1(pmt,NM\_004821),

POM121L10P(NR\_024593),BCRP3(NR\_024494),

ZDHHC9(pmt,NM\_001008222),ZDHHC9(pmt,NM\_016032),  
FAM217B(pmt,NM\_001190826),SYCP2(pmt,NM\_014258),  
WNT7B(NM\_058238),  
COL6A1(NM\_001848),  
KCNQ2(NM\_172108),KCNQ2(NM\_004518),KCNQ2(NM\_172106),KCNQ2(NM\_172107),  
DENND1A(NM\_020946),

PIGG(pmt,NM\_001289052),PIGG(pmt,NR\_110293),PIGG(pmt,NM\_001289053),PIGG(pmt,NM\_  
SNED1(NM\_001080437),

NTSR1(NM\_002531),

BCOR(NM\_001123383),BCOR(NM\_001123384),  
SLC12A5(NM\_001134771),SLC12A5(NM\_020708),  
SLC4A7(NM\_001258379),

ZFYVE28(NM\_001172658),ZFYVE28(NM\_001172656),ZFYVE28(NM\_020972),ZFYVE28(NM\_001

RB1(NM\_000321),  
SFI1(NM\_001258327),SFI1(NM\_001258325),SFI1(NM\_001007467),SFI1(NM\_001258326),SFI1(

SORCS2(NM\_020777),

IFT52(pmt,NM\_016004),

CUX2(NM\_015267),  
CXCL1(NM\_001511),CXCL1(NR\_046035),

RNF213(NM\_001256071),

DIAPH3(NM\_001258369),DIAPH3(NM\_030932),DIAPH3(NM\_001258368),DIAPH3(NM\_001258  
LYPLA1(pmt,NM\_001279359),LYPLA1(pmt,NM\_001279358),LYPLA1(pmt,NM\_001279357),LYP  
GLB1L3(NM\_001080407),

ZFYVE21(pmt,NM\_001198953),XRCC3(NM\_001100118),XRCC3(NM\_001100119),ZFYVE21(pmt

PDE7B(NM\_018945),  
DCP1B(NM\_152640),

C11orf95(NM\_001144936),  
SLC22A23(NM\_001286455),SLC22A23(NR\_104448),SLC22A23(NM\_021945),SLC22A23(NM\_01

NEURL1B(NM\_001142651),  
SNRPN(NM\_022807),SNRPN(NM\_022806),SNRPN(NM\_022808),SNRPN(NM\_022805),  
COLCA2(pmt,NM\_001136105),COLCA1(NR\_034154),COLCA2(NM\_001271457),COLCA2(NM\_001136105),  
C8orf74(NM\_001040032),

MMRN2(NM\_024756),  
KCNT1(NM\_001272003),KCNT1(NM\_020822),  
TAOK3(NM\_016281),

NREP(NM\_001142474),NREP(pmt,NM\_001142478),NREP(NM\_001142475),NREP(NM\_001142474),  
MIR548H4(NR\_031680),NOX5(NR\_033672),NOX5(NM\_024505),NOX5(NR\_033671),NOX5(NM\_024505)

PLXNA4(pmt,NM\_001105543),PLXNA4(NM\_181775),PLXNA4(pmt,NM\_020911),

ENOPH1(NM\_021204),  
PTPN2(NM\_002828),PTPN2(NM\_080422),PTPN2(NM\_080423),PTPN2(NM\_001207013),

ABL1(NM\_007313),ABL1(pmt,NM\_005157),  
LATS2(NM\_014572),  
TRAPPC9(NM\_031466),TRAPPC9(NM\_001160372),  
TBL1X(NM\_001139466),TBL1X(NM\_001139467),TBL1X(NM\_001139468),TBL1X(NM\_005647),  
CRYL1(NM\_015974),

CNR2(NM\_001841),  
ZNF804A(NM\_194250),

TMEM63A(NM\_014698),  
FSCN3(pmt,NM\_020369),



PTPRN2(NM\_130842),PTPRN2(NM\_130843),PTPRN2(NM\_002847),

KIAA1614(NM\_020950),  
RGPD3(NM\_001144013),

TFAP2C(pmt,NM\_003222),  
KIAA1257(NM\_020741),  
IFT27(NM\_006860),IFT27(NR\_033531),IFT27(NM\_001177701),

AHRR(NM\_020731),AHRR(NM\_001242412),

EGR4(NM\_001965),

MCF2L(NM\_001112732),

MEG3(NR\_046465),MEG3(NR\_002766),MEG3(NR\_046466),MEG3(NR\_046467),MEG3(NR\_046  
CLYBL(NR\_104592),CLYBL(NM\_206808),  
ACOT7(NM\_181864),ACOT7(NM\_181865),ACOT7(NM\_007274),ACOT7(NM\_181866),  
GALNS(NM\_000512),

PRKAR1B(NM\_002735),PRKAR1B(NM\_001164760),PRKAR1B(NM\_001164762),PRKAR1B(NM\_(  
F7(NM\_001267554),F7(NR\_051961),F7(NM\_019616),F7(NM\_000131),  
TPM4(NM\_001145160),TPM4(pmt,NM\_003290),

LOC340357(NR\_015383),LINC00681(NR\_102423),  
MAST4(NM\_001164664),MAST4(NM\_001290228),MAST4(NM\_198828),

NLGN4Y(NM\_014893),NLGN4Y(NR\_028319),NLGN4Y(NR\_046355),NLGN4Y(NM\_001206850),

GPR132(NM\_001278694),GPR132(NM\_001278695),GPR132(NM\_013345),GPR132(NM\_00127  
WDR27(NM\_182552),WDR27(NM\_001202550),  
ESAM(NM\_138961),

BOK-AS1(NR\_033346),  
GREB1(NM\_033090),GREB1(NM\_014668),GREB1(NM\_148903),  
IL17C(NM\_013278),

JRKL-AS1(pmt,NR\_047481),

CARD9(NM\_052814),CARD9(NM\_052813),

RAB3IP(NR\_103520),RAB3IP(NR\_103519),RAB3IP(NM\_022456),RAB3IP(NM\_175624),RAB3IP(N

GFRA2(pmt,NM\_001165038),GFRA2(pmt,NM\_001165039),GFRA2(pmt,NM\_001495),

PRCD(NR\_033357),CYGB(NM\_134268),

PPP6R1(NM\_014931),

TBCD(NM\_005993),

HOXB-AS3(pmt,NR\_033201),HOXB-AS3(pmt,NR\_110331),HOXB-AS3(pmt,NR\_033202),

RPH3AL(NM\_006987),RPH3AL(NM\_001190412),RPH3AL(NM\_001190413),RPH3AL(NM\_00119

PTPRN2(NM\_130842),PTPRN2(NM\_130843),PTPRN2(NM\_002847),

TMEM163(NM\_030923),

INPP5A(NM\_005539),

COL23A1(NM\_173465),

ST8SIA3(NM\_015879),

C22orf34(NR\_110522),C22orf34(NR\_110523),

OPCML(NM\_002545),OPCML(NM\_001012393),

LRRC27(NM\_030626),LRRC27(NM\_001143757),

CDHR5(NM\_021924),CDHR5(NM\_031264),CDHR5(NM\_001171968),



SARDH(NM\_001134707),SARDH(NM\_007101),  
U2AF2(pmt,NM\_007279),U2AF2(pmt,NM\_001012478),CCDC106(NM\_013301),

LRRC75A-AS1(NR\_027177),LRRC75A(NM\_001113567),LRRC75A-AS1(NR\_027176),LRRC75A-AS:

OLFM2(NM\_058164),  
FLYWCH1(NM\_032296),FLYWCH1(NM\_020912),  
SKOR1(NM\_001258024),

SEC14L1(NM\_003003),SEC14L1(NM\_001204410),SEC14L1(NM\_001144001),SEC14L1(NM\_001  
PCDH19(NM\_001184880),PCDH19(NM\_020766),PCDH19(NM\_001105243),  
PRRG3(NM\_024082),PRRG3(pmt,NR\_033262),  
ALPPL2(NM\_031313),  
FAM167A(NM\_053279),

RGS12(pmt,NM\_002926),RGS12(pmt,NM\_198229),  
COL28A1(NM\_001037763),  
DGKK(NM\_001013742),

LINC00305(NR\_027245),LOC284294(NR\_033881),  
EPSTI1(NM\_001002264),EPSTI1(NM\_033255),  
GALNT12(NM\_024642),  
HCN2(NM\_001194),

CDKN2A(NM\_058197),CDKN2A(NM\_058195),CDKN2A(NM\_001195132),CDKN2A(NM\_000077),  
ACTN4(NM\_004924),

CLSTN3(NM\_014718),  
BZRAP1-AS1(NR\_038411),BZRAP1-AS1(NR\_038413),BZRAP1-AS1(NR\_038412),MIR142(pmt,NR

RNF128(NM\_024539),

RADIL(NM\_018059),PAPOLB(pmt,NM\_020144),

ZNF257(pmt,NM\_033468),  
MBD5(NM\_018328),

FAM20C(NM\_020223),  
RAI1(NM\_030665),  
ATP8B3(NM\_138813),ATP8B3(NR\_047593),ATP8B3(NM\_001178002),  
C20orf112(NM\_001256798),  
NTM(NM\_001048209),  
TPO(NM\_000547),TPO(NM\_175719),TPO(NM\_001206745),TPO(NM\_001206744),TPO(NM\_17  
NHSL2(NM\_001013627),

CHID1(NM\_023947),CHID1(NM\_001142674),CHID1(NM\_001142677),CHID1(NM\_001142676),  
LOC101929234(pmt,NR\_110304),ZNF503-AS2(NR\_024421),ZNF503-AS2(NR\_110299),ZNF503-  
CASZ1(NM\_001079843),  
ZNF232(NM\_014519),  
TAF1(NR\_104396),TAF1(NR\_104391),TAF1(NR\_104388),TAF1(NR\_104389),TAF1(NR\_104395),

TTL(NM\_153712),

KATNB1(NM\_005886),  
FBRSL1(NM\_001142641),  
ZBTB6(pmt,NM\_006626),

TUNAR(NR\_038861),  
DBH-AS1(NR\_102735),DBH(NM\_000787),  
BDH1(NM\_203315),BDH1(NM\_004051),BDH1(NM\_203314),  
ING2(NM\_001564),  
GALNT9(NM\_001122636),

DOCK11(NM\_144658),

CELSR1(NM\_014246),  
PSTPIP1(NM\_003978),

ZBTB46(NM\_025224),  
SLC4A4(NM\_001098484),SLC4A4(NM\_001134742),SLC4A4(NM\_003759),

LOC101927421(NR\_109882),  
KCNK17(NM\_031460),KCNK17(NM\_001135111),

PFKFB3(NM\_001282630),PFKFB3(NM\_001145443),PFKFB3(NM\_004566),  
GNA11(NM\_002067),  
C7orf50(NM\_001134395),C7orf50(NM\_001134396),MIR339(pmt,NR\_029898),C7orf50(NM\_001134395),  
BAIAP2(NM\_017450),BAIAP2(NM\_006340),BAIAP2(NM\_017451),BAIAP2(NM\_001144888),  
NKX2-8(pmt,NM\_014360),  
TTY23B(pmt,NR\_003593),TTY23(pmt,NR\_001540),  
STK32C(NM\_173575),

OCIAD2(NM\_001286774),OCIAD2(NM\_152398),OCIAD2(NR\_104589),OCIAD2(NM\_001014446),  
GEMIN5(pmt,NM\_001252156),MRPL22(pmt,NM\_001014990),GEMIN5(pmt,NM\_015465),MRPL22(pmt,NM\_001014990),  
EBF3(pmt,NM\_001005463),

SLC12A5(NM\_001134771),SLC12A5(NM\_020708),

LINC00359(NR\_051966),  
BAHCC1(NM\_001291324),BAHCC1(NM\_001080519),  
ARMCX6(NM\_019007),ARMCX6(NR\_033669),ARMCX6(NR\_033670),ARMCX6(NM\_001009584),  
KCNN4(NM\_002250),  
ZWILCH(pmt,NM\_017975),ZWILCH(pmt,NM\_001287822),ZWILCH(pmt,NM\_001287823),ZWILCH(pmt,NM\_001287823),  
LRP8(NM\_033300),LRP8(NM\_001018054),LRP8(NM\_004631),LRP8(NM\_017522),

TACC2(pmt,NM\_206860),TACC2(NM\_206861),TACC2(pmt,NM\_006997),TACC2(NM\_206862),  
SHC4(NM\_203349),  
DIAPH2(NM\_007309),DIAPH2(NM\_006729),

MNX1(NM\_001165255),MNX1(NM\_005515),  
SDHA(NM\_004168),CCDC127(pmt,NM\_145265),  
SRMS(NM\_080823),PTK6(pmt,NM\_001256358),PTK6(pmt,NM\_005975),

LCN15(pmt,NM\_203347),  
LOC101929387(NR\_110946),LMF1(NR\_033646),LOC101929387(NR\_110945),LMF1(NR\_033646),  
EPHX3(NM\_001142886),EPHX3(pmt,NM\_024794),

MIDN(NM\_177401),  
FIBCD1(NM\_032843),FIBCD1(NM\_001145106),

LEPR(NM\_001003680),LEPR(NM\_001198689),LEPR(NM\_001198687),LEPR(NM\_001198688),LE  
HIST1H4I(NM\_003495),HIST1H2BK(NM\_080593),  
CASKIN1(NM\_020764),

NRG3(pmt,NM\_001165973),NRG3(NM\_001165972),NRG3(NM\_001010848),

FLAD1(NM\_201398),FLAD1(NM\_025207),FLAD1(NM\_001184891),FLAD1(NM\_001184892),  
NUBPL(NM\_025152),

SUN1(NM\_001130965),SUN1(NM\_001171944),SUN1(NM\_025154),  
CACNA1H(NM\_021098),CACNA1H(NM\_001005407),

MARCH3(NM\_178450),

SCARB1(NM\_005505),SCARB1(NM\_001082959),  
PGLYRP1(NM\_005091),  
TMEM240(pmt,NM\_001114748),SSU72(NM\_014188),

TBX4(pmt,NM\_018488),

GABBR2(NM\_005458),

HORMAD1(NM\_032132),HORMAD1(NM\_001199829),  
C11orf87(NM\_207645),

EOGT(NR\_103826),EOGT(NM\_001278689),EOGT(NM\_173654),  
RFWD2(NM\_001286644),RFWD2(NM\_022457),RFWD2(NM\_001001740),SCARNA3(pmt,NR\_00  
ERICH1-AS1(NR\_073397),  
FGF12(NM\_004113),FGF12(pmt,NM\_021032),  
ARMCX2(NM\_177949),ARMCX2(NM\_014782),ARMCX2(NM\_001282231),

OSR2(NM\_001286841),OSR2(NM\_053001),OSR2(NM\_001142462),

KCTD15(NM\_001129994),KCTD15(NM\_024076),KCTD15(NM\_001129995),

MAGI1(NM\_001033057),MAGI1(NM\_015520),MAGI1(NM\_004742),

KRT8(NR\_045962),KRT8(NM\_001256282),KRT8(NM\_001256293),KRT8(pmt,NM\_002273),

PIK3R5(NM\_001251855),PIK3R5(NM\_001251852),PIK3R5(NM\_001251853),PIK3R5(NM\_001251854)

362),DNM2(NM\_004945),

1577),PDE9A(NM\_001001584),PDE9A(NM\_001001576),PDE9A(NM\_001001582),PDE9A(NM\_001

53),FAM86C1(NM\_018172),

i(NM\_001199322),BLOC1S5(NM\_001199323),

.TBP1(NM\_000627),

IM\_138740),UBAP2L(pmt,NM\_014847),UBAP2L(pmt,NM\_001287816),C1orf43(NM\_001098616),



01199527),C21orf128(NR\_027243),

'8696),





1282149),MIR3183(NR\_036148),

8415),

1286403),

ILGN4Y(NM\_001164238),



R2(NM\_000141),FGFR2(NM\_001144916),FGFR2(NM\_001144918),FGFR2(NM\_001144919),FGFR:

1286075),LOC100289092(pmt,NR\_046289),LOC100289092(pmt,NR\_046290),LOC100289092(pr

\_015378),

'8696),

9),

|\_023035),CACNA1A(NM\_001127222),

NR\_033645),LMF1(NR\_033646),

RSS3(pmt,NM\_001256317),UBASH3A(pmt,NM\_018961),TMPRSS3(pmt,NM\_032405),UBASH3A(p  
01164759),PRKAR1B(NM\_001164758),PRKAR1B(NM\_001164761),

NM\_172109),

001276260),RGS3(NM\_001276261),



PAX5(NR\_103999),PAX5(NM\_001280550),PAX5(NM\_016734),PAX5(NM\_001280556),PAX5(NM\_

05),COL13A1(NM\_080802),COL13A1(NM\_080798),

0411),

IF596(pmt,NM\_001287256),ZNF596(pmt,NM\_173539),ZNF596(pmt,NM\_001287399),ZNF596(pn

\_001289051),ZNF721(NM\_133474),PIGG(pmt,NM\_001289057),PIGG(pmt,NM\_001289055),PIGG

L172657),

{NM\_014775),

{366),DIAPH3(NM\_001258367),DIAPH3(NM\_001042517),  
LA1(pmt,NM\_001279356),LYPLA1(pmt,NM\_001279360),LYPLA1(pmt,NM\_006330),

;NM\_024071),XRCC3(NM\_005432),

5482),SLC22A23(NM\_001286456),

)1271458),

477),NREP(NM\_001142476),NREP(pmt,NM\_004772),NREP(pmt,NM\_001142481),NREP(pmt,NM\_001184780),NOX5(NM\_001184779),

NM\_001202543),CUX1(NM\_001202544),CUX1(NM\_181552),

5),

471),MEG3(NR\_046470),MEG3(NR\_046468),MEG3(NR\_046469),MEG3(NR\_046464),MEG3(NR\_C

01164759),PRKAR1B(NM\_001164758),PRKAR1B(NM\_001164761),

'8696),

NM\_175625),RAB3IP(NM\_001278402),RAB3IP(NM\_001024647),RAB3IP(NM\_175623),

0411),

1(NR\_027171),LRRC75A-AS1(NR\_027173),LRRC75A-AS1(NR\_027172),LRRC75A(NM\_207387),LRR

204408),SEC14L1(NM\_001143998),SEC14L1(NM\_001039573),SEC14L1(NM\_001143999),

),

\_029683),BZRAP1(pmt,NM\_004758),BZRAP1-AS1(pmt,NR\_038417),BZRAP1-AS1(pmt,NR\_03841



5722),TPO(NM\_175721),

CHID1(NM\_001142675),

AS2(NR\_110301),ZNF503-AS2(NR\_024422),ZNF503-AS2(NR\_110302),ZNF503(pmt,NM\_032772),;

TAF1(NR\_104394),BCYRN1(NR\_001568),TAF1(NR\_104390),INGX(pmt,NR\_002226),TAF1(NR\_1043

32350),

i),OCIAD2(NM\_001286773),  
pL22(pmt,NM\_014180),

l),ARMCX6(NM\_001184768),

CH(pmt,NM\_001287821),SNAPC5(pmt,NM\_006049),RPL4(NM\_000968),

5),LMF1(NM\_022773),

PR(NM\_001003679),LEPR(NM\_002303),

2998),

51851),PIK3R5(NM\_001142633),

.001567),PDE9A(NM\_001001572),PDE9A(NM\_002606),PDE9A(NM\_001001574),PDE9A(NM\_001

















2(NM\_022970),FGFR2(NM\_001144914),FGFR2(NM\_001144915),

it,NR\_046288),



mt,NM\_001243467),

.001280554),PAX5(NM\_001280552),PAX5(NR\_104000),PAX5(NM\_001280553),PAX5(NM\_001280



nt,NM\_001042416),RPL23AP53(NR\_003572),

(pmt,NM\_017733),PIGG(pmt,NM\_001127178),

\_001142480),NREP(pmt,NM\_001142479),NREP(pmt,NM\_001142483),NREP(pmt,NM\_00114248



103530),MEG3(NR\_046473),MEG3(NR\_046472),MEG3(NR\_033358),MEG3(NR\_033359),MEG3(NF



C75A-AS1(NR\_027178),LRRC75A-AS1(NR\_045025),LRRC75A-AS1(NR\_027175),LRRC75A-AS1(NR\_0

8),BZRAP1(pmt,NM\_024418),BZRAP1-AS1(pmt,NR\_038414),BZRAP1-AS1(pmt,NR\_038415),BZRA

ZNF503-AS2(NR\_110300),

387),TAF1(NR\_104393),TAF1(NR\_104392),

































0551),







2),



3\_033360),MEG3(NR\_003531),



027174),LRRC75A-AS1(NR\_045023),

P1-AS1(pmt,NR\_038416),BZRAP1(pmt,NM\_001261835),BZRAP1-AS1(NR\_038410),











001001571),PDE9A(NM\_001001573),PDE9A(NM\_001001581),PDE9A(NM\_001001580),PDE9A(NI



















































M\_001001569),

| <b>DMR_coordinate</b>     | <b>DMR size</b> | <b>z-score</b> | <b><math>\Delta</math> methylation<br/>(LGA-IUGR)</b> |       |
|---------------------------|-----------------|----------------|-------------------------------------------------------|-------|
| chr16:967919-967972       |                 | 53             | 7.75                                                  | 0.612 |
| chrY:13656095-13656161    |                 | 66             | 5.61                                                  | 0.568 |
| chr22:41331906-41331962   |                 | 56             | 7.02                                                  | 0.562 |
| chr2:148927666-148927762  |                 | 96             | 8.5                                                   | 0.543 |
| chr7:158584014-158584106  |                 | 92             | 5.68                                                  | 0.515 |
| chr22:41634621-41634708   |                 | 87             | 10.06                                                 | 0.49  |
| chr8:138323698-138323795  |                 | 97             | 6.36                                                  | 0.488 |
| chr21:24401706-24401753   |                 | 47             | 4.61                                                  | 0.473 |
| chr9:46115342-46115411    |                 | 69             | 7.92                                                  | 0.47  |
| chr4:93103550-93103628    |                 | 78             | 6.43                                                  | 0.468 |
| chr3:138656627-138656685  |                 | 58             | 7.2                                                   | 0.462 |
| chr12:132918303-132918372 |                 | 69             | 7.43                                                  | 0.46  |
| chr18:77291033-77291117   |                 | 84             | 8.93                                                  | 0.447 |
| chr3:28100833-28100914    |                 | 81             | 6.16                                                  | 0.442 |
| chr19:4058767-4058815     |                 | 48             | 6.12                                                  | 0.44  |
| chr8:99960164-99960244    |                 | 80             | 8.9                                                   | 0.44  |
| chrY:20835437-20835477    |                 | 40             | 6.54                                                  | 0.438 |
| chr1:245337245-245337305  |                 | 60             | 5.66                                                  | 0.435 |
| chr6:27107287-27107373    |                 | 86             | 13                                                    | 0.431 |
| chr1:228771891-228771949  |                 | 58             | 6.02                                                  | 0.429 |
| chr2:132585387-132585411  |                 | 24             | 5.52                                                  | 0.427 |
| chr16:21770086-21770180   |                 | 94             | 4.91                                                  | 0.427 |
| chr22:47018284-47018392   |                 | 108            | 5.93                                                  | 0.425 |
| chr1:229721521-229721585  |                 | 64             | 4.74                                                  | 0.425 |
| chr8:107789104-107789175  |                 | 71             | 4.89                                                  | 0.422 |
| chr14:103569638-103569670 |                 | 32             | 4.47                                                  | 0.42  |
| chr4:35834335-35834364    |                 | 29             | 5.62                                                  | 0.416 |
| chr11:1077726-1077814     |                 | 88             | 4.67                                                  | 0.415 |
| chr19:44278301-44278399   |                 | 98             | 9.55                                                  | 0.411 |
| chr15:49184286-49184348   |                 | 62             | 6.01                                                  | 0.409 |
| chr19:12671669-12671715   |                 | 46             | 6.63                                                  | 0.407 |
| chrX:100309354-100309416  |                 | 62             | 5.94                                                  | 0.405 |
| chr8:10261943-10262021    |                 | 78             | 5.07                                                  | 0.405 |
| chr10:134940287-134940373 |                 | 86             | 5.2                                                   | 0.403 |
| chr6:17728998-17729051    |                 | 53             | 8.17                                                  | 0.399 |
| chr12:121190083-121190138 |                 | 55             | 6.77                                                  | 0.398 |
| chr9:47288065-47288098    |                 | 33             | 4.21                                                  | 0.397 |
| chr1:8913580-8913630      |                 | 50             | 6.41                                                  | 0.397 |
| chr5:177792412-177792511  |                 | 99             | 10.28                                                 | 0.39  |

|                           |     |       |       |
|---------------------------|-----|-------|-------|
| chr16:981326-981382       | 56  | 6.95  | 0.386 |
| chr10:134639455-134639531 | 76  | 5.41  | 0.386 |
| chr13:88997786-88997850   | 64  | 5.98  | 0.385 |
| chr2:174569830-174569906  | 76  | 4.69  | 0.384 |
| chr12:113059229-113059305 | 76  | 6.68  | 0.381 |
| chr10:1233066-1233132     | 66  | 6.74  | 0.38  |
| chr4:149747834-149747934  | 100 | 4.7   | 0.379 |
| chr4:24503100-24503160    | 60  | 5.26  | 0.375 |
| chr22:46913295-46913360   | 65  | 5.57  | 0.372 |
| chr4:31998259-31998425    | 166 | 18.15 | 0.37  |
| chr20:2801235-2801292     | 57  | 5.18  | 0.37  |
| chr17:212292-212335       | 43  | 6.65  | 0.367 |
| chr16:33421602-33421684   | 82  | 5.54  | 0.366 |
| chr21:34998722-34998768   | 46  | 4.21  | 0.365 |
| chr10:6254147-6254238     | 91  | 4.89  | 0.363 |
| chr5:165469580-165469614  | 34  | 6.8   | 0.363 |
| chr8:146042932-146042978  | 46  | 7.17  | 0.36  |
| chr8:11871079-11871134    | 55  | 5.14  | 0.36  |
| chr14:99482361-99482413   | 52  | 6.1   | 0.36  |
| chr4:33252967-33253034    | 67  | 6.85  | 0.359 |
| chr11:2828445-2828484     | 39  | 6.55  | 0.359 |
| chr6:20024309-20024357    | 48  | 6.98  | 0.358 |
| chr16:21533530-21533593   | 63  | 4.78  | 0.358 |
| chrX:3867973-3868013      | 40  | 5.95  | 0.357 |
| chr16:2834634-2834709     | 75  | 5.13  | 0.357 |
| chr5:171591768-171591845  | 77  | 4.98  | 0.357 |
| chr6:63962974-63963069    | 95  | 5.75  | 0.356 |
| chr7:3319955-3319995      | 40  | 6.13  | 0.355 |
| chr18:45662358-45662427   | 69  | 4.78  | 0.355 |
| chr13:20966048-20966133   | 85  | 6.45  | 0.354 |
| chr21:44167127-44167192   | 65  | 4.1   | 0.353 |
| chrX:43431782-43431904    | 122 | 6.08  | 0.351 |
| chrY:9386236-9386310      | 74  | 6.47  | 0.35  |
| chr3:65534684-65534778    | 94  | 10.81 | 0.349 |
| chr8:145806459-145806554  | 95  | 5.35  | 0.349 |
| chr16:1147435-1147530     | 95  | 4.18  | 0.347 |
| chr12:111265818-111265856 | 38  | 4.57  | 0.345 |
| chr13:53452233-53452289   | 56  | 4.1   | 0.345 |
| chr7:5435725-5435756      | 31  | 5.57  | 0.345 |
| chrX:50172410-50172449    | 39  | 4.84  | 0.345 |
| chr7:63882880-63882931    | 51  | 7.47  | 0.344 |

|                           |     |      |       |
|---------------------------|-----|------|-------|
| chrX:44420418-44420492    | 74  | 4.87 | 0.344 |
| chr19:33143312-33143406   | 94  | 6.06 | 0.343 |
| chr7:12151528-12151622    | 94  | 6.12 | 0.343 |
| chr11:2946949-2947003     | 54  | 5.12 | 0.342 |
| chr5:150614448-150614543  | 95  | 5.14 | 0.342 |
| chr8:143262198-143262233  | 35  | 4.15 | 0.338 |
| chr9:89517722-89517809    | 87  | 4.29 | 0.337 |
| chr9:138664682-138664765  | 83  | 4.22 | 0.335 |
| chr14:76446159-76446250   | 91  | 7.88 | 0.334 |
| chr1:242017041-242017124  | 83  | 4.71 | 0.333 |
| chr10:32039062-32039157   | 95  | 6    | 0.33  |
| chr15:26884002-26884054   | 52  | 4.51 | 0.33  |
| chr17:21477417-21477517   | 100 | 6.05 | 0.329 |
| chr2:204483105-204483175  | 70  | 4.57 | 0.328 |
| chr1:204056270-204056340  | 70  | 4.46 | 0.328 |
| chr13:20802823-20802919   | 96  | 5.5  | 0.325 |
| chr7:27197205-27197262    | 57  | 5.14 | 0.325 |
| chr7:101694274-101694344  | 70  | 5.51 | 0.325 |
| chr11:17627607-17627656   | 49  | 7.74 | 0.325 |
| chr17:74321210-74321306   | 96  | 8.21 | 0.324 |
| chr11:96240883-96240976   | 93  | 6.4  | 0.324 |
| chr17:5019250-5019301     | 51  | 4.01 | 0.324 |
| chr11:73480654-73480730   | 76  | 7.24 | 0.323 |
| chr2:23657018-23657061    | 43  | 5.66 | 0.323 |
| chr11:46388927-46389011   | 84  | 4.44 | 0.323 |
| chrX:128655113-128655155  | 42  | 4.31 | 0.322 |
| chr17:46674834-46674889   | 55  | 5.45 | 0.32  |
| chr9:29213421-29213464    | 43  | 5.04 | 0.32  |
| chr12:52243299-52243330   | 31  | 4.08 | 0.32  |
| chr2:54378098-54378174    | 76  | 4.46 | 0.319 |
| chr2:207069312-207069376  | 64  | 5.21 | 0.318 |
| chr3:129317983-129318057  | 74  | 5.54 | 0.316 |
| chr17:42082468-42082576   | 108 | 7.58 | 0.316 |
| chrX:40879406-40879536    | 130 | 8.01 | 0.315 |
| chr17:39685080-39685115   | 35  | 4.67 | 0.315 |
| chr12:131956968-131957062 | 94  | 5.29 | 0.314 |
| chrX:92567811-92567873    | 62  | 5.65 | 0.314 |
| chr18:9434218-9434273     | 55  | 4.16 | 0.314 |
| chr1:158169402-158169582  | 180 | 6.6  | 0.313 |
| chr2:177053813-177053848  | 35  | 4.77 | 0.312 |
| chr15:90191761-90191841   | 80  | 7.66 | 0.311 |

|                           |     |       |       |
|---------------------------|-----|-------|-------|
| chrX:39730953-39731021    | 68  | 5.48  | 0.31  |
| chrY:420668-420731        | 63  | 5.4   | 0.31  |
| chr2:113246054-113246132  | 78  | 5.87  | 0.31  |
| chr2:145180114-145180195  | 81  | 7.53  | 0.309 |
| chr21:29170494-29170584   | 90  | 5.31  | 0.307 |
| chr2:132585599-132585659  | 60  | 7.09  | 0.305 |
| chr10:83635647-83635710   | 63  | 6.41  | 0.305 |
| chr20:62173600-62173678   | 78  | 4.85  | 0.304 |
| chr13:88213615-88213693   | 78  | 6.77  | 0.304 |
| chr9:132160810-132160911  | 101 | 5.41  | 0.304 |
| chr16:29193279-29193359   | 80  | 5.43  | 0.303 |
| chrY:9745306-9745415      | 109 | 4.77  | 0.303 |
| chr17:47174205-47174248   | 43  | 6.85  | 0.302 |
| chr2:234389694-234389764  | 70  | 5.13  | 0.302 |
| chr19:3964967-3964988     | 21  | 4.74  | 0.302 |
| chr8:179560-179691        | 131 | 12.12 | 0.302 |
| chrX:46934930-46935024    | 94  | 4.01  | 0.302 |
| chr8:4607770-4607824      | 54  | 4.42  | 0.3   |
| chr19:5915241-5915342     | 101 | 5.01  | 0.3   |
| chr14:59097009-59097055   | 46  | 4.43  | 0.3   |
| chrX:96589275-96589354    | 79  | 4.43  | 0.3   |
| chr10:77158971-77159048   | 77  | 5.9   | 0.299 |
| chr10:70376805-70376872   | 67  | 4.4   | 0.298 |
| chrY:10032612-10032670    | 58  | 5.46  | 0.298 |
| chr18:76189810-76189845   | 35  | 4.27  | 0.298 |
| chr3:190842943-190842981  | 38  | 5.07  | 0.297 |
| chr4:1519837-1519865      | 28  | 4.49  | 0.297 |
| chr10:48156178-48156226   | 48  | 4.14  | 0.297 |
| chr19:643435-643496       | 61  | 5.26  | 0.297 |
| chr11:48875103-48875174   | 71  | 5.19  | 0.296 |
| chr18:75509314-75509354   | 40  | 4.48  | 0.296 |
| chr15:65708763-65708771   | 8   | 4.72  | 0.295 |
| chr1:159255839-159255851  | 12  | 6.89  | 0.294 |
| chr19:40421602-40421700   | 98  | 5.61  | 0.293 |
| chr12:113643741-113643817 | 76  | 5.57  | 0.293 |
| chrY:9747779-9747910      | 131 | 4.45  | 0.293 |
| chr10:42854039-42854117   | 78  | 5.27  | 0.293 |
| chr4:8948181-8948215      | 34  | 5.36  | 0.292 |
| chrY:13926207-13926225    | 18  | 4.84  | 0.292 |
| chr6:6002293-6002331      | 38  | 4.64  | 0.292 |
| chr3:147129812-147129887  | 75  | 4.09  | 0.292 |

|                           |     |      |       |
|---------------------------|-----|------|-------|
| chr5:99696422-99696473    | 51  | 5.72 | 0.292 |
| chr7:2802247-2802394      | 147 | 4.85 | 0.292 |
| chr18:31423483-31423538   | 55  | 4.08 | 0.292 |
| chr22:29075729-29075771   | 42  | 5.45 | 0.291 |
| chr9:132221620-132221700  | 80  | 4.27 | 0.291 |
| chr6:115496643-115496695  | 52  | 4.73 | 0.29  |
| chrX:131623657-131623744  | 87  | 7.83 | 0.29  |
| chr19:37792521-37792568   | 47  | 6.5  | 0.29  |
| chr17:56085810-56085899   | 89  | 5.85 | 0.29  |
| chr8:90105816-90105871    | 55  | 4.44 | 0.288 |
| chr1:79825964-79826004    | 40  | 6.57 | 0.288 |
| chr16:1035691-1035775     | 84  | 4.04 | 0.287 |
| chr18:9470271-9470358     | 87  | 4.84 | 0.287 |
| chr1:105392179-105392255  | 76  | 5.99 | 0.286 |
| chr20:62688389-62688452   | 63  | 6.44 | 0.286 |
| chr8:9487433-9487488      | 55  | 4.57 | 0.286 |
| chr12:81467210-81467280   | 70  | 4.11 | 0.286 |
| chr14:107100786-107100858 | 72  | 6.44 | 0.286 |
| chr6:170598485-170598541  | 56  | 7.58 | 0.286 |
| chr6:121484124-121484162  | 38  | 4.07 | 0.285 |
| chr7:2958282-2958325      | 43  | 4.48 | 0.283 |
| chr1:3352882-3352947      | 65  | 4.33 | 0.283 |
| chr3:75653550-75653638    | 88  | 4.6  | 0.283 |
| chr2:133426659-133426682  | 23  | 4.74 | 0.282 |
| chr13:113763574-113763657 | 83  | 4.4  | 0.282 |
| chr2:170105362-170105417  | 55  | 4.33 | 0.282 |
| chr1:191254439-191254515  | 76  | 4.15 | 0.282 |
| chr4:129627676-129627776  | 100 | 5    | 0.281 |
| chr13:79675294-79675431   | 137 | 6.44 | 0.281 |
| chr7:30972920-30973019    | 99  | 9.56 | 0.28  |
| chr14:75419817-75419893   | 76  | 9.08 | 0.28  |
| chr12:64910321-64910393   | 72  | 7.54 | 0.28  |
| chrX:138136375-138136475  | 100 | 5.3  | 0.28  |
| chr7:43484954-43485015    | 61  | 4.86 | 0.279 |
| chr10:134672822-134672882 | 60  | 6.09 | 0.279 |
| chr21:29535269-29535294   | 25  | 4.03 | 0.278 |
| chr1:228075487-228075572  | 85  | 6.55 | 0.278 |
| chr10:99481812-99481891   | 79  | 4.3  | 0.278 |
| chr5:220791-220828        | 37  | 4.2  | 0.278 |
| chr16:89900138-89900195   | 57  | 5.84 | 0.277 |
| chr19:1881077-1881169     | 92  | 4.8  | 0.277 |

|                           |     |       |       |
|---------------------------|-----|-------|-------|
| chr3:24136674-24136750    | 76  | 7.17  | 0.276 |
| chr8:8559990-8560085      | 95  | 6.48  | 0.276 |
| chrX:48870137-48870233    | 96  | 7.29  | 0.276 |
| chr15:66274675-66274726   | 51  | 10.05 | 0.276 |
| chr1:2256363-2256421      | 58  | 4.5   | 0.275 |
| chr20:61391049-61391121   | 72  | 6.15  | 0.275 |
| chr19:3097121-3097182     | 61  | 4.79  | 0.274 |
| chr6:140268489-140268571  | 82  | 5.12  | 0.274 |
| chr12:132834397-132834467 | 70  | 5.12  | 0.274 |
| chr1:3346154-3346274      | 120 | 5.93  | 0.273 |
| chr1:216909713-216909776  | 63  | 4.43  | 0.273 |
| chr19:554432-554531       | 99  | 9.16  | 0.273 |
| chr13:26761323-26761378   | 55  | 4.8   | 0.273 |
| chr2:151261811-151261883  | 72  | 5.34  | 0.272 |
| chr9:137710259-137710318  | 59  | 6.93  | 0.271 |
| chr12:108523648-108523849 | 201 | 8.3   | 0.27  |
| chr2:201980507-201980553  | 46  | 5.95  | 0.27  |
| chr1:2771863-2771914      | 51  | 5.4   | 0.27  |
| chrY:18745876-18745978    | 102 | 5     | 0.27  |
| chr7:148735907-148735955  | 48  | 4.43  | 0.27  |
| chr13:99760800-99760847   | 47  | 4.23  | 0.27  |
| chr11:2014748-2014824     | 76  | 4.1   | 0.27  |
| chr18:14748107-14748198   | 91  | 8.51  | 0.269 |
| chr10:17874608-17874680   | 72  | 6.79  | 0.269 |
| chr17:26711968-26712047   | 79  | 6.04  | 0.268 |
| chrX:69677662-69677717    | 55  | 4.6   | 0.268 |
| chr12:109246226-109246296 | 70  | 4.24  | 0.267 |
| chrY:9706564-9706648      | 84  | 5.52  | 0.266 |
| chr19:17264078-17264173   | 95  | 5.49  | 0.266 |
| chr9:136454723-136454767  | 44  | 4.13  | 0.266 |
| chr22:39753946-39754032   | 86  | 11.21 | 0.266 |
| chr7:157744916-157744938  | 22  | 5.31  | 0.265 |
| chr16:1210308-1210390     | 82  | 4.5   | 0.265 |
| chr5:145562986-145563049  | 63  | 6.52  | 0.264 |
| chr6:50817733-50817804    | 71  | 6.13  | 0.264 |
| chr15:22026481-22026534   | 53  | 4.32  | 0.263 |
| chr5:40681874-40681973    | 99  | 6.41  | 0.263 |
| chr12:131707989-131708089 | 100 | 6.97  | 0.262 |
| chr19:52206905-52207005   | 100 | 5.55  | 0.262 |
| chr10:98537361-98537417   | 56  | 4.35  | 0.262 |
| chr1:175048759-175048874  | 115 | 6.25  | 0.261 |



|                           |     |      |       |
|---------------------------|-----|------|-------|
| chr3:151912005-151912148  | 143 | 7.55 | 0.26  |
| chr16:2753710-2753769     | 59  | 5.85 | 0.26  |
| chr22:37622729-37622772   | 43  | 4.66 | 0.26  |
| chr18:67361018-67361090   | 72  | 6.42 | 0.258 |
| chr4:185205120-185205186  | 66  | 6.98 | 0.258 |
| chr6:20239411-20239673    | 262 | 6.65 | 0.258 |
| chr7:809042-809110        | 68  | 4.03 | 0.258 |
| chr12:57177788-57177822   | 34  | 6.03 | 0.258 |
| chr11:1027438-1027464     | 26  | 5.43 | 0.258 |
| chr12:3329914-3329967     | 53  | 4.84 | 0.258 |
| chr11:67746323-67746369   | 46  | 4.53 | 0.258 |
| chr8:144390914-144390970  | 56  | 4.45 | 0.258 |
| chr5:108586448-108586538  | 90  | 4.36 | 0.257 |
| chr19:36757763-36757923   | 160 | 7.71 | 0.257 |
| chr5:177209373-177209445  | 72  | 7.9  | 0.257 |
| chr22:45412748-45412770   | 22  | 4.68 | 0.256 |
| chr10:2978330-2978422     | 92  | 7.63 | 0.256 |
| chr4:184278124-184278193  | 69  | 7.57 | 0.255 |
| chr17:47295480-47295547   | 67  | 4.27 | 0.255 |
| chr9:139166269-139166361  | 92  | 5.32 | 0.254 |
| chr9:138603616-138603639  | 23  | 4.86 | 0.254 |
| chr4:25326795-25326858    | 63  | 4.1  | 0.254 |
| chr20:277040-277095       | 55  | 5.08 | 0.253 |
| chr8:62186404-62186424    | 20  | 4.53 | 0.253 |
| chrX:130863888-130864026  | 138 | 8.01 | 0.253 |
| chr10:78579005-78579111   | 106 | 4.65 | 0.253 |
| chr3:147138916-147138951  | 35  | 5.06 | 0.253 |
| chr2:159519409-159519479  | 70  | 4.91 | 0.253 |
| chr13:113648881-113648930 | 49  | 4.3  | 0.253 |
| chrX:99151541-99151568    | 27  | 4.29 | 0.253 |
| chr19:18761387-18761480   | 93  | 4.87 | 0.25  |
| chr1:145573478-145573562  | 84  | 4.91 | 0.25  |
| chr16:10934645-10934656   | 11  | 4.18 | 0.25  |
| chr12:114846694-114846788 | 94  | 4.89 | 0.249 |
| chr19:7923124-7923198     | 74  | 7.6  | 0.249 |
| chr21:46786484-46786563   | 79  | 4.1  | 0.248 |
| chr7:989199-989229        | 30  | 5.43 | 0.248 |
| chr10:45923598-45923618   | 20  | 4.84 | 0.248 |
| chr3:193894513-193894591  | 78  | 5.83 | 0.248 |
| chr12:70172913-70173015   | 102 | 8.65 | 0.247 |
| chr1:17051581-17051627    | 46  | 4.3  | 0.247 |

|                           |     |      |       |
|---------------------------|-----|------|-------|
| chr11:48922049-48922117   | 68  | 7    | 0.247 |
| chr7:158937826-158937837  | 11  | 4.61 | 0.246 |
| chrX:103287158-103287234  | 76  | 5.16 | 0.246 |
| chr1:214846486-214846656  | 170 | 9.22 | 0.245 |
| chr11:2454559-2454675     | 116 | 4.56 | 0.245 |
| chr10:89120046-89120098   | 52  | 5.29 | 0.245 |
| chr2:170826293-170826355  | 62  | 4.23 | 0.245 |
| chr2:208632215-208632303  | 88  | 6.19 | 0.244 |
| chr17:8073739-8073839     | 100 | 5.52 | 0.244 |
| chr4:96573524-96573575    | 51  | 4.82 | 0.244 |
| chr1:106122844-106122953  | 109 | 5.31 | 0.244 |
| chr3:109787410-109787458  | 48  | 5.3  | 0.244 |
| chr7:150706058-150706100  | 42  | 4.89 | 0.244 |
| chr7:148677960-148678024  | 64  | 4.16 | 0.244 |
| chr9:136994689-136994789  | 100 | 8.27 | 0.243 |
| chr20:61337036-61337101   | 65  | 6.61 | 0.243 |
| chr12:15496725-15496808   | 83  | 5.48 | 0.243 |
| chr4:132670447-132670498  | 51  | 4.25 | 0.243 |
| chr1:146375060-146375071  | 11  | 5.61 | 0.242 |
| chr20:36012782-36012806   | 24  | 4.67 | 0.242 |
| chr7:53761604-53761684    | 80  | 4.03 | 0.242 |
| chr11:1891883-1891952     | 69  | 4.49 | 0.242 |
| chr10:106390430-106390510 | 80  | 4.54 | 0.241 |
| chr2:11515107-11515206    | 99  | 4.16 | 0.241 |
| chr5:140810501-140810583  | 82  | 6.58 | 0.241 |
| chr10:23293869-23293958   | 89  | 5.48 | 0.24  |
| chr1:227793866-227793948  | 82  | 4.71 | 0.24  |
| chr1:17186261-17186331    | 70  | 7.21 | 0.24  |
| chr19:56160420-56160485   | 65  | 5    | 0.24  |
| chr5:13017807-13017869    | 62  | 4.61 | 0.24  |
| chr6:27408502-27408599    | 97  | 4.41 | 0.239 |
| chr19:58908082-58908128   | 46  | 6.56 | 0.238 |
| chr14:104569027-104569116 | 89  | 4.48 | 0.238 |
| chr2:236397274-236397408  | 134 | 9.37 | 0.238 |
| chr10:4572582-4572652     | 70  | 4.75 | 0.238 |
| chrY:8121318-8121333      | 15  | 4.37 | 0.238 |
| chr5:178657416-178657500  | 84  | 4.22 | 0.238 |
| chrX:84627123-84627177    | 54  | 4.1  | 0.238 |
| chr13:88629136-88629200   | 64  | 6.12 | 0.237 |
| chr3:197606838-197606886  | 48  | 5.03 | 0.237 |
| chr12:131172747-131172788 | 41  | 5.19 | 0.236 |

|                           |     |       |       |
|---------------------------|-----|-------|-------|
| chr6:33500359-33500431    | 72  | 4.97  | 0.236 |
| chr19:307875-307933       | 58  | 4.38  | 0.235 |
| chr6:960812-960869        | 57  | 5.44  | 0.235 |
| chr22:40526709-40526765   | 56  | 5.2   | 0.235 |
| chr16:68390395-68390485   | 90  | 5.09  | 0.235 |
| chr10:83683249-83683303   | 54  | 4.34  | 0.235 |
| chr1:204329003-204329091  | 88  | 4.31  | 0.235 |
| chr3:121902480-121902510  | 30  | 4.21  | 0.235 |
| chr21:47546053-47546211   | 158 | 11.57 | 0.235 |
| chr17:46796018-46796171   | 153 | 6.22  | 0.235 |
| chr13:113636050-113636134 | 84  | 4.76  | 0.234 |
| chrX:39607393-39607468    | 75  | 5.11  | 0.234 |
| chr4:132647036-132647106  | 70  | 5.22  | 0.234 |
| chr11:132951898-132951984 | 86  | 4.6   | 0.234 |
| chr8:60787901-60788035    | 134 | 5.2   | 0.233 |
| chr10:42837821-42837906   | 85  | 5.79  | 0.233 |
| chrY:16897369-16897501    | 132 | 5.58  | 0.233 |
| chr2:232266056-232266118  | 62  | 4.36  | 0.233 |
| chr16:31363804-31363854   | 50  | 4.52  | 0.233 |
| chrX:106394980-106395026  | 46  | 4.54  | 0.232 |
| chr21:21552336-21552443   | 107 | 4.66  | 0.232 |
| chr11:2014545-2014645     | 100 | 5.8   | 0.232 |
| chr7:151385425-151385494  | 69  | 4.87  | 0.232 |
| chr20:2775904-2775985     | 81  | 4.24  | 0.232 |
| chr1:154474799-154474862  | 63  | 4.33  | 0.231 |
| chr19:1227926-1227940     | 14  | 8.99  | 0.23  |
| chr5:95826954-95827052    | 98  | 4.73  | 0.23  |
| chr2:98340852-98340909    | 57  | 4.16  | 0.23  |
| chr6:31163625-31163667    | 42  | 4.46  | 0.23  |
| chr22:40041383-40041420   | 37  | 4.12  | 0.23  |
| chr17:15849356-15849454   | 98  | 4.76  | 0.229 |
| chr11:129686297-129686456 | 159 | 5.03  | 0.229 |
| chr22:26149086-26149187   | 101 | 4.93  | 0.229 |
| chr1:39980539-39980584    | 45  | 4.84  | 0.229 |
| chr10:124908191-124908244 | 53  | 7     | 0.229 |
| chr8:99371459-99371510    | 51  | 4.5   | 0.229 |
| chr10:110967868-110967930 | 62  | 5.48  | 0.229 |
| chr2:83390856-83390903    | 47  | 4.79  | 0.228 |
| chr16:26495622-26495673   | 51  | 4.32  | 0.228 |
| chr4:779400-779481        | 81  | 5.27  | 0.228 |
| chr21:41135452-41135566   | 114 | 4.2   | 0.228 |

|                           |     |       |       |
|---------------------------|-----|-------|-------|
| chr19:4544457-4544548     | 91  | 5.29  | 0.227 |
| chr1:145464419-145464495  | 76  | 6.04  | 0.227 |
| chr7:67423866-67423928    | 62  | 5.33  | 0.227 |
| chr10:1156718-1156750     | 32  | 4.52  | 0.227 |
| chrY:3311820-3311884      | 64  | 5.52  | 0.227 |
| chr21:47476579-47476638   | 59  | 5.99  | 0.226 |
| chr17:44972034-44972051   | 17  | 4.85  | 0.226 |
| chr7:52181323-52181367    | 44  | 4.53  | 0.226 |
| chr18:54240712-54240732   | 20  | 4.43  | 0.226 |
| chr22:44546406-44546465   | 59  | 4.41  | 0.226 |
| chr2:75944472-75944634    | 162 | 8.31  | 0.226 |
| chr4:80885808-80886228    | 420 | 11.96 | 0.225 |
| chr18:13491623-13491712   | 89  | 5.2   | 0.225 |
| chr1:957621-957664        | 43  | 4.13  | 0.225 |
| chr10:126136260-126136384 | 124 | 10.91 | 0.224 |
| chr2:172945010-172945228  | 218 | 7.9   | 0.224 |
| chr12:122356207-122356456 | 249 | 7.17  | 0.224 |
| chr18:77240733-77240812   | 79  | 4.66  | 0.224 |
| chr10:133961946-133962003 | 57  | 4.75  | 0.224 |
| chr5:3213375-3213437      | 62  | 4.99  | 0.224 |
| chr19:54277641-54277772   | 131 | 8.57  | 0.224 |
| chr6:10881846-10881926    | 80  | 6.22  | 0.223 |
| chr7:7504862-7505029      | 167 | 6.73  | 0.223 |
| chr7:55683001-55683081    | 80  | 5.2   | 0.223 |
| chr21:47545481-47545538   | 57  | 5.53  | 0.223 |
| chr14:103576325-103576395 | 70  | 4.76  | 0.223 |
| chr1:163363441-163363484  | 43  | 4.03  | 0.222 |
| chr15:96889072-96889270   | 198 | 12.4  | 0.222 |
| chr12:131622488-131622585 | 97  | 4.72  | 0.222 |
| chr11:61511260-61511341   | 81  | 4.57  | 0.222 |
| chr13:59808732-59808803   | 71  | 4.63  | 0.221 |
| chr7:66086878-66086942    | 64  | 4     | 0.221 |
| chr1:67550222-67550296    | 74  | 5.63  | 0.221 |
| chr6:50787477-50787737    | 260 | 13.59 | 0.221 |
| chr18:26028069-26028177   | 108 | 4.86  | 0.22  |
| chr1:223566734-223566855  | 121 | 5.68  | 0.22  |
| chr4:9499876-9499937      | 61  | 5.17  | 0.22  |
| chr7:148736109-148736160  | 51  | 4.61  | 0.22  |
| chr5:177280622-177280673  | 51  | 5.82  | 0.22  |
| chr10:3805336-3805415     | 79  | 5.71  | 0.22  |
| chr9:137107741-137107807  | 66  | 5.58  | 0.22  |

|                           |     |      |       |
|---------------------------|-----|------|-------|
| chr7:136878782-136878848  | 66  | 4.69 | 0.22  |
| chr2:220312993-220313069  | 76  | 5.4  | 0.219 |
| chr1:1353652-1353732      | 80  | 5.38 | 0.219 |
| chr12:130342962-130343054 | 92  | 5.16 | 0.218 |
| chr12:34261578-34261650   | 72  | 4.55 | 0.218 |
| chr4:151501296-151501379  | 83  | 5.63 | 0.218 |
| chr20:35886478-35886538   | 60  | 4.35 | 0.218 |
| chr19:50312549-50312647   | 98  | 7.83 | 0.217 |
| chr4:132463802-132463874  | 72  | 4.5  | 0.217 |
| chr19:40324102-40324224   | 122 | 6.95 | 0.217 |
| chr6:20239028-20239259    | 231 | 9.14 | 0.217 |
| chr19:5192313-5192401     | 88  | 4.32 | 0.217 |
| chr5:155108262-155108357  | 95  | 9.74 | 0.216 |
| chr1:86622240-86622310    | 70  | 5.26 | 0.216 |
| chr7:1553564-1553608      | 44  | 4.84 | 0.216 |
| chr16:86547305-86547375   | 70  | 4.89 | 0.216 |
| chr17:4479057-4479158     | 101 | 5.28 | 0.215 |
| chr5:179859204-179859209  | 5   | 4.86 | 0.215 |
| chr19:419851-419975       | 124 | 4.19 | 0.215 |
| chr11:1156425-1156510     | 85  | 5.02 | 0.215 |
| chr14:54413929-54413983   | 54  | 5    | 0.215 |
| chr18:60278531-60278591   | 60  | 4.7  | 0.215 |
| chrX:49368586-49368610    | 24  | 4.22 | 0.215 |
| chr14:39012422-39012532   | 110 | 4.56 | 0.215 |
| chr12:126345728-126345924 | 196 | 6.55 | 0.214 |
| chr1:2390327-2390412      | 85  | 5.57 | 0.214 |
| chr4:174427949-174428061  | 112 | 4.37 | 0.214 |
| chr13:53174187-53174407   | 220 | 7.11 | 0.214 |
| chrX:13309320-13309417    | 97  | 5.01 | 0.213 |
| chr5:66084564-66084635    | 71  | 4.04 | 0.213 |
| chr11:1464581-1464621     | 40  | 5.3  | 0.213 |
| chr17:17597176-17597233   | 57  | 6.52 | 0.213 |
| chr11:59810617-59810669   | 52  | 6.4  | 0.212 |
| chr4:9534636-9534655      | 19  | 4.31 | 0.212 |
| chr7:5342325-5342389      | 64  | 8.17 | 0.212 |
| chr4:132657972-132658058  | 86  | 5.54 | 0.212 |
| chr6:447469-447575        | 106 | 5.17 | 0.212 |
| chrX:145177909-145177988  | 79  | 4.73 | 0.212 |
| chr8:12654115-12654201    | 86  | 6.72 | 0.212 |
| chr19:5229509-5229571     | 62  | 5.34 | 0.211 |
| chr4:169798952-169799011  | 59  | 5.59 | 0.211 |

|                           |     |      |       |
|---------------------------|-----|------|-------|
| chr4:132648018-132648104  | 86  | 6.85 | 0.21  |
| chrX:39938003-39938102    | 99  | 5.7  | 0.21  |
| chr8:10573937-10574027    | 90  | 5    | 0.21  |
| chrX:129378475-129378547  | 72  | 4.39 | 0.21  |
| chr1:1912754-1912800      | 46  | 4.33 | 0.21  |
| chr17:35007383-35007401   | 18  | 4.15 | 0.21  |
| chr8:105439401-105439500  | 99  | 4.13 | 0.21  |
| chr1:52072440-52072536    | 96  | 5.41 | 0.21  |
| chr8:137806001-137806097  | 96  | 5.39 | 0.21  |
| chr7:750312-750376        | 64  | 4.84 | 0.21  |
| chr20:26232234-26232329   | 95  | 4.75 | 0.21  |
| chr1:7191104-7191162      | 58  | 4.2  | 0.21  |
| chr19:3539061-3539159     | 98  | 4.06 | 0.21  |
| chr20:62439900-62439962   | 62  | 4.02 | 0.21  |
| chr12:9892160-9892247     | 87  | 6.91 | 0.209 |
| chr7:82143636-82143720    | 84  | 6.45 | 0.209 |
| chr18:77171124-77171171   | 47  | 5.58 | 0.209 |
| chr10:123001880-123002084 | 204 | 5.65 | 0.209 |
| chr19:12880686-12880776   | 90  | 6.18 | 0.209 |
| chr1:149719435-149719493  | 58  | 4.34 | 0.209 |
| chr19:1170411-1170512     | 101 | 6.24 | 0.208 |
| chr13:112338149-112338219 | 70  | 4.1  | 0.208 |
| chr10:15471953-15472017   | 64  | 4.02 | 0.208 |
| chr4:146654445-146654531  | 86  | 4.35 | 0.208 |
| chr20:42143379-42143466   | 87  | 8.3  | 0.208 |
| chr19:838980-839036       | 56  | 8.61 | 0.208 |
| chr11:2602931-2603011     | 80  | 4.32 | 0.208 |
| chr4:9523587-9523678      | 91  | 4.27 | 0.208 |
| chr20:44686589-44686644   | 55  | 6.62 | 0.207 |
| chr15:59158695-59158782   | 87  | 5.12 | 0.207 |
| chr6:10882800-10882850    | 50  | 5.11 | 0.207 |
| chr14:99793933-99793992   | 59  | 5.09 | 0.207 |
| chr4:179337164-179337262  | 98  | 4.82 | 0.207 |
| chr8:144788612-144788674  | 62  | 4.21 | 0.207 |
| chr20:1874525-1874567     | 42  | 4.05 | 0.207 |
| chr7:71965303-71965359    | 56  | 7.27 | 0.207 |
| chr6:10883022-10883115    | 93  | 5.68 | 0.207 |
| chr10:71626579-71626668   | 89  | 4.28 | 0.207 |
| chr4:132679463-132679524  | 61  | 4.03 | 0.206 |
| chr1:62624369-62624478    | 109 | 4.02 | 0.206 |
| chr4:132680310-132680438  | 128 | 7.41 | 0.206 |

|                           |     |       |        |
|---------------------------|-----|-------|--------|
| chr6:64630989-64631084    | 95  | 5.26  | 0.206  |
| chr13:80929895-80930063   | 168 | 5.85  | 0.206  |
| chr5:113077139-113077204  | 65  | 4.17  | 0.205  |
| chr19:55586011-55586104   | 93  | 6.68  | 0.205  |
| chr6:39271536-39271591    | 55  | 4.46  | 0.205  |
| chr19:52207159-52207213   | 54  | 8.18  | 0.205  |
| chr6:130588971-130589047  | 76  | 4.28  | 0.205  |
| chr2:119592703-119592756  | 53  | 5.93  | 0.204  |
| chr5:131281289-131281363  | 74  | 4.59  | 0.204  |
| chr14:57278958-57279032   | 74  | 4.79  | 0.204  |
| chr2:97215928-97216026    | 98  | 7.64  | 0.204  |
| chr6:150311604-150311639  | 35  | 6.24  | 0.204  |
| chrX:39764864-39764977    | 113 | 6.13  | 0.203  |
| chr17:684406-684456       | 50  | 4.43  | 0.203  |
| chr1:92946708-92946788    | 80  | 5.8   | 0.203  |
| chr13:53174535-53174674   | 139 | 9.91  | 0.203  |
| chr7:101944128-101944551  | 423 | 18.62 | 0.203  |
| chr15:73592796-73592836   | 40  | 4.43  | 0.203  |
| chr15:101924512-101924577 | 65  | 4.73  | 0.202  |
| chr16:28635279-28635295   | 16  | 4.38  | 0.202  |
| chr2:236401819-236401899  | 80  | 4.58  | 0.202  |
| chr10:131694777-131694868 | 91  | 4.29  | 0.202  |
| chr13:114825686-114825786 | 100 | 4.11  | 0.202  |
| chr16:10972790-10972889   | 99  | 7.09  | 0.202  |
| chr12:131433149-131433209 | 60  | 6.85  | 0.202  |
| chr16:64984895-64984977   | 82  | 4.91  | 0.201  |
| chr12:3310069-3310151     | 82  | 4.75  | 0.201  |
| chr2:11724899-11725011    | 112 | 6.51  | 0.201  |
| chr9:137594789-137594882  | 93  | 4.54  | 0.2    |
| chr1:174321187-174321242  | 55  | 5.27  | 0.2    |
| chr3:27754663-27754713    | 50  | 4.07  | 0.2    |
| chr11:118505568-118505630 | 62  | 4.05  | 0.2    |
| chr2:763520-763588        | 68  | -4.38 | -0.2   |
| chr11:68883599-68883637   | 38  | -4.64 | -0.2   |
| chr9:92112254-92112307    | 53  | -4.21 | -0.2   |
| chr15:72736345-72736417   | 72  | -4.94 | -0.201 |
| chr6:32116892-32116964    | 72  | -4.07 | -0.202 |
| chr13:112710252-112710333 | 81  | -4.1  | -0.202 |
| chr15:53087304-53087359   | 55  | -4.14 | -0.202 |
| chr7:55541062-55541162    | 100 | -4.36 | -0.202 |
| chr19:14729388-14729467   | 79  | -4.71 | -0.202 |

|                           |     |       |        |
|---------------------------|-----|-------|--------|
| chr22:43701140-43701229   | 89  | -5.69 | -0.202 |
| chr17:78500005-78500111   | 106 | -8.08 | -0.202 |
| chr17:15197509-15197566   | 57  | -4.12 | -0.202 |
| chr4:1649415-1649495      | 80  | -4.5  | -0.202 |
| chr4:151504163-151504262  | 99  | -6.1  | -0.202 |
| chr17:28088204-28088302   | 98  | -4.15 | -0.203 |
| chr7:6116001-6116055      | 54  | -4.72 | -0.203 |
| chr2:3118674-3118719      | 45  | -4.79 | -0.203 |
| chr7:145123607-145123706  | 99  | -5.17 | -0.203 |
| chr7:1475464-1475560      | 96  | -5.2  | -0.203 |
| chr10:70014234-70014280   | 46  | -5.33 | -0.203 |
| chr1:194252765-194252889  | 124 | -7.48 | -0.203 |
| chr11:23673926-23673970   | 44  | -5.45 | -0.203 |
| chr13:105607917-105608033 | 116 | -4.06 | -0.203 |
| chr7:3221329-3221397      | 68  | -7.31 | -0.203 |
| chr5:176077109-176077228  | 119 | -5.54 | -0.204 |
| chr9:139403218-139403294  | 76  | -4.19 | -0.204 |
| chr16:83679934-83680027   | 93  | -4.42 | -0.204 |
| chr8:73065372-73065495    | 123 | -5.28 | -0.205 |
| chr7:5338884-5338901      | 17  | -4.3  | -0.205 |
| chr5:87911779-87911826    | 47  | -6.52 | -0.205 |
| chr1:89568920-89568982    | 62  | -4.06 | -0.205 |
| chr22:33502063-33502127   | 64  | -4.29 | -0.205 |
| chr6:21702370-21702495    | 125 | -4.43 | -0.205 |
| chr8:34308894-34308921    | 27  | -4.67 | -0.205 |
| chr13:29105372-29105576   | 204 | -6.28 | -0.205 |
| chr3:153036166-153036305  | 139 | -7.59 | -0.205 |
| chr3:125417321-125417386  | 65  | -4.85 | -0.206 |
| chr1:1369156-1369257      | 101 | -4.07 | -0.206 |
| chr7:157937049-157937104  | 55  | -4.12 | -0.206 |
| chrY:28614200-28614279    | 79  | -4.3  | -0.206 |
| chr19:4071087-4071127     | 40  | -5.87 | -0.206 |
| chr5:488373-488521        | 148 | -7.04 | -0.206 |
| chr1:11947264-11947298    | 34  | -4.54 | -0.206 |
| chr15:42174330-42174428   | 98  | -5.02 | -0.207 |
| chr22:51043856-51043954   | 98  | -4.09 | -0.208 |
| chr2:226077814-226077912  | 98  | -4.53 | -0.208 |
| chr10:132576130-132576275 | 145 | -5.6  | -0.208 |
| chr3:145726253-145726616  | 363 | -8.78 | -0.208 |
| chr2:231575777-231575833  | 56  | -4.6  | -0.209 |
| chr14:44067372-44067444   | 72  | -4.51 | -0.209 |



|                           |     |        |        |
|---------------------------|-----|--------|--------|
| chr1:164078965-164079128  | 163 | -4.97  | -0.209 |
| chr4:189191175-189191306  | 131 | -5.14  | -0.209 |
| chr2:26951289-26951369    | 80  | -6.21  | -0.209 |
| chr13:112814082-112814156 | 74  | -5.39  | -0.21  |
| chr3:70236775-70236838    | 63  | -4.17  | -0.21  |
| chr19:13995545-13995606   | 61  | -4.4   | -0.21  |
| chr17:73554238-73554293   | 55  | -5.24  | -0.21  |
| chr2:127936001-127936006  | 5   | -5.73  | -0.21  |
| chr1:235517174-235517208  | 34  | -4.15  | -0.21  |
| chr1:239138790-239138824  | 34  | -4.25  | -0.21  |
| chr11:6435283-6435333     | 50  | -4.62  | -0.21  |
| chr11:1368339-1368391     | 52  | -4.71  | -0.21  |
| chr6:169192581-169192649  | 68  | -5.06  | -0.21  |
| chr14:22230010-22230025   | 15  | -5.54  | -0.21  |
| chr4:177613209-177613262  | 53  | -5.82  | -0.211 |
| chr6:5038790-5038860      | 70  | -6.68  | -0.211 |
| chr17:79131879-79131975   | 96  | -4.74  | -0.211 |
| chr19:38876349-38876392   | 43  | -4.17  | -0.212 |
| chr14:104927011-104927120 | 109 | -4.27  | -0.212 |
| chr1:1957289-1957374      | 85  | -5.1   | -0.212 |
| chr22:49295394-49295444   | 50  | -5.79  | -0.212 |
| chr22:50008764-50008858   | 94  | -5.35  | -0.212 |
| chr5:67113703-67113865    | 162 | -8.24  | -0.212 |
| chr20:15966162-15966386   | 224 | -6.62  | -0.212 |
| chr5:112737817-112737864  | 47  | -4.18  | -0.212 |
| chr3:129290099-129290175  | 76  | -4.36  | -0.213 |
| chr4:28118089-28118158    | 69  | -4.49  | -0.213 |
| chr8:44647-44781          | 134 | -5.06  | -0.213 |
| chrX:139847059-139847133  | 74  | -4.46  | -0.213 |
| chr14:23276342-23276403   | 61  | -5.7   | -0.213 |
| chr5:89369204-89369352    | 148 | -7.26  | -0.214 |
| chr22:49579791-49579852   | 61  | -10.29 | -0.214 |
| chr8:77767073-77767133    | 60  | -9.6   | -0.214 |
| chr5:55334913-55334983    | 70  | -4.17  | -0.214 |
| chr5:153967847-153967905  | 58  | -4.19  | -0.214 |
| chr4:619583-619656        | 73  | -4.36  | -0.214 |
| chr3:6126855-6126907      | 52  | -4.93  | -0.214 |
| chr7:137943382-137943446  | 64  | -5.31  | -0.214 |
| chr18:77659275-77659313   | 38  | -4.17  | -0.214 |
| chr16:941451-941520       | 69  | -4.65  | -0.214 |
| chr6:27988671-27988721    | 50  | -5.51  | -0.214 |

|                           |     |       |        |
|---------------------------|-----|-------|--------|
| chr19:42928385-42928444   | 59  | -5.35 | -0.214 |
| chr9:139233107-139233189  | 82  | -5.2  | -0.215 |
| chr12:90930631-90930687   | 56  | -4.54 | -0.215 |
| chr7:633050-633101        | 51  | -4.54 | -0.215 |
| chr14:76334380-76334455   | 75  | -4.88 | -0.215 |
| chr16:85410001-85410042   | 41  | -5.1  | -0.215 |
| chr16:83640778-83640820   | 42  | -4.02 | -0.215 |
| chr9:45449686-45449764    | 78  | -5.05 | -0.215 |
| chr4:113600630-113600686  | 56  | -5.77 | -0.215 |
| chr18:77306995-77307094   | 99  | -5.64 | -0.215 |
| chr16:10346287-10346358   | 71  | -5.19 | -0.216 |
| chr20:19764618-19764719   | 101 | -4.42 | -0.216 |
| chr1:3080725-3080780      | 55  | -4.34 | -0.216 |
| chrX:125594123-125594254  | 131 | -5.35 | -0.216 |
| chr5:60152823-60152855    | 32  | -4.1  | -0.217 |
| chrX:124748782-124748863  | 81  | -4.16 | -0.217 |
| chr1:1475062-1475189      | 127 | -7.4  | -0.217 |
| chr8:4248194-4248359      | 165 | -7.91 | -0.217 |
| chr11:92819310-92819370   | 60  | -6.11 | -0.217 |
| chr22:31120925-31120957   | 32  | -4.48 | -0.217 |
| chr15:40396019-40396066   | 47  | -4.7  | -0.217 |
| chr4:95762740-95762834    | 94  | -6.17 | -0.217 |
| chr19:8176937-8177005     | 68  | -4.23 | -0.218 |
| chr1:6159645-6159677      | 32  | -5.05 | -0.218 |
| chr17:1085691-1085755     | 64  | -4.05 | -0.218 |
| chr12:57183772-57183795   | 23  | -4.2  | -0.218 |
| chr6:52156860-52157009    | 149 | -6.44 | -0.218 |
| chr16:89040343-89040406   | 63  | -4.63 | -0.218 |
| chr10:131583737-131583779 | 42  | -4.85 | -0.218 |
| chr6:170472110-170472140  | 30  | -4.16 | -0.22  |
| chr20:55389779-55389859   | 80  | -4.31 | -0.22  |
| chrX:40005389-40005398    | 9   | -4.53 | -0.22  |
| chr12:131077156-131077191 | 35  | -4.69 | -0.22  |
| chr19:10615299-10615398   | 99  | -5.58 | -0.22  |
| chr2:136905035-136905081  | 46  | -4.96 | -0.22  |
| chr1:6442193-6442389      | 196 | -9.55 | -0.221 |
| chrX:153584447-153584626  | 179 | -4.28 | -0.221 |
| chr8:142537429-142537527  | 98  | -4.44 | -0.222 |
| chr7:147179760-147179770  | 10  | -4.43 | -0.222 |
| chr18:77336437-77336485   | 48  | -4.35 | -0.222 |
| chr17:8629421-8629445     | 24  | -4.38 | -0.222 |

|                           |     |        |        |
|---------------------------|-----|--------|--------|
| chr11:3536763-3536848     | 85  | -5.85  | -0.222 |
| chrX:40936042-40936162    | 120 | -7.85  | -0.222 |
| chr16:31230634-31230740   | 106 | -6.34  | -0.222 |
| chr18:25691214-25691268   | 54  | -4.33  | -0.222 |
| chr22:33724210-33724305   | 95  | -4.08  | -0.223 |
| chr15:101096298-101096349 | 51  | -4.21  | -0.223 |
| chr18:27058488-27058585   | 97  | -5.64  | -0.223 |
| chr1:19146693-19146712    | 19  | -4.61  | -0.223 |
| chr16:84911684-84911784   | 100 | -6.07  | -0.223 |
| chr8:89448837-89448889    | 52  | -4.22  | -0.224 |
| chr20:31565612-31565670   | 58  | -4.37  | -0.224 |
| chr2:128453128-128453319  | 191 | -15.15 | -0.224 |
| chr7:4133309-4133391      | 82  | -5.09  | -0.225 |
| chr21:33449587-33449646   | 59  | -4.71  | -0.225 |
| chr16:1079315-1079373     | 58  | -5.08  | -0.225 |
| chr5:179172893-179172975  | 82  | -4.65  | -0.225 |
| chr5:19573575-19573622    | 47  | -4.27  | -0.226 |
| chr1:248335584-248335754  | 170 | -5.57  | -0.227 |
| chr10:83068817-83068862   | 45  | -4     | -0.227 |
| chr16:5047167-5047193     | 26  | -4.4   | -0.227 |
| chr10:135390548-135390800 | 252 | -6.24  | -0.227 |
| chr1:11773709-11773763    | 54  | -4.02  | -0.228 |
| chr22:40405797-40405858   | 61  | -4.11  | -0.228 |
| chr1:46005208-46005282    | 74  | -6.01  | -0.228 |
| chr16:52836364-52836438   | 74  | -4.56  | -0.228 |
| chr19:36002187-36002255   | 68  | -4.39  | -0.228 |
| chr1:2038376-2038454      | 78  | -4.42  | -0.229 |
| chr22:23776027-23776238   | 211 | -6.72  | -0.229 |
| chr10:25871969-25872057   | 88  | -5.03  | -0.23  |
| chr1:19408049-19408118    | 69  | -5.5   | -0.23  |
| chr21:46521101-46521146   | 45  | -4.21  | -0.23  |
| chrX:140705651-140705751  | 100 | -4.55  | -0.23  |
| chr7:73306080-73306092    | 12  | -4.65  | -0.23  |
| chr3:155028911-155028986  | 75  | -5.13  | -0.23  |
| chr17:704715-704779       | 64  | -5.28  | -0.23  |
| chr20:10348883-10348935   | 52  | -5.38  | -0.23  |
| chr2:233210792-233210949  | 157 | -6.49  | -0.23  |
| chr9:124987723-124987813  | 90  | -9.31  | -0.23  |
| chr10:43133977-43134077   | 100 | -4.08  | -0.23  |
| chr16:11072863-11072947   | 84  | -4.5   | -0.23  |
| chr6:98864475-98864744    | 269 | -12.33 | -0.231 |

|                           |     |       |        |
|---------------------------|-----|-------|--------|
| chr17:41402012-41402204   | 192 | -6.35 | -0.231 |
| chr10:134942296-134942373 | 77  | -4.75 | -0.232 |
| chr16:78063972-78064036   | 64  | -4.34 | -0.232 |
| chr22:33729164-33729304   | 140 | -4.85 | -0.232 |
| chr1:2747459-2747492      | 33  | -4.04 | -0.232 |
| chr17:77011912-77011963   | 51  | -4.61 | -0.232 |
| chr4:58306229-58306317    | 88  | -4.02 | -0.232 |
| chr11:133796460-133796500 | 40  | -4.54 | -0.232 |
| chr7:44801335-44801389    | 54  | -4.76 | -0.232 |
| chr2:45303114-45303190    | 76  | -4.39 | -0.233 |
| chr19:49934430-49934486   | 56  | -4.44 | -0.233 |
| chr18:77340766-77340862   | 96  | -4.56 | -0.233 |
| chr18:14377619-14377759   | 140 | -4.58 | -0.233 |
| chr4:7758476-7758517      | 41  | -4.68 | -0.233 |
| chr3:136688257-136688394  | 137 | -5.22 | -0.234 |
| chr13:46894376-46894434   | 58  | -4.3  | -0.234 |
| chr1:8148828-8148879      | 51  | -6.25 | -0.234 |
| chr14:80890375-80890513   | 138 | -5.48 | -0.234 |
| chr8:8328637-8328746      | 109 | -4.75 | -0.235 |
| chr22:24256199-24256353   | 154 | -6.83 | -0.235 |
| chr15:73806515-73806559   | 44  | -4.09 | -0.236 |
| chr4:8006899-8006962      | 63  | -5.1  | -0.237 |
| chr16:81224835-81224882   | 47  | -6.53 | -0.237 |
| chr3:20276348-20276409    | 61  | -4.09 | -0.238 |
| chr8:3027971-3028020      | 49  | -4.56 | -0.238 |
| chr13:50266288-50266384   | 96  | -6.1  | -0.238 |
| chr12:116008212-116008282 | 70  | -6.34 | -0.238 |
| chr12:4223495-4223550     | 55  | -4.72 | -0.238 |
| chr1:115568990-115569056  | 66  | -4.08 | -0.24  |
| chr9:132954639-132954731  | 92  | -4.26 | -0.24  |
| chr20:35187689-35187711   | 22  | -4.35 | -0.24  |
| chr19:688400-688427       | 27  | -6.6  | -0.24  |
| chr22:20480487-20480571   | 84  | -5.78 | -0.24  |
| chr9:137714735-137714788  | 53  | -4.88 | -0.24  |
| chr17:42420319-42420380   | 61  | -5.02 | -0.24  |
| chr5:1074968-1075046      | 78  | -4.17 | -0.241 |
| chr10:19430865-19430958   | 93  | -6.13 | -0.241 |
| chr10:31700415-31700510   | 95  | -4.54 | -0.242 |
| chr1:175097861-175097892  | 31  | -4.14 | -0.242 |
| chr9:87162112-87162190    | 78  | -4.36 | -0.242 |
| chr9:139913458-139913558  | 100 | -4.94 | -0.242 |

|                           |     |       |        |
|---------------------------|-----|-------|--------|
| chr22:36975991-36976043   | 52  | -4.25 | -0.242 |
| chr1:54729004-54729029    | 25  | -4.43 | -0.242 |
| chr1:240907966-240908006  | 40  | -4.67 | -0.242 |
| chr9:75456665-75456706    | 41  | -5.1  | -0.242 |
| chr10:1284153-1284243     | 90  | -5.12 | -0.242 |
| chr7:149809178-149809261  | 83  | -7.75 | -0.243 |
| chr9:76918011-76918109    | 98  | -4.79 | -0.244 |
| chrX:34961656-34961692    | 36  | -6.11 | -0.244 |
| chrX:33620014-33620072    | 58  | -4.37 | -0.244 |
| chr11:2017781-2017859     | 78  | -7.24 | -0.244 |
| chr9:117762484-117762585  | 101 | -4.89 | -0.245 |
| chrX:3746101-3746147      | 46  | -5.73 | -0.245 |
| chr2:239023705-239023764  | 59  | -4.55 | -0.245 |
| chr14:105518005-105518092 | 87  | -8.62 | -0.245 |
| chrY:28507815-28507880    | 65  | -4.85 | -0.246 |
| chr9:15139643-15139744    | 101 | -4.69 | -0.247 |
| chr13:48654360-48654458   | 98  | -5    | -0.247 |
| chr22:48112286-48112330   | 44  | -4.15 | -0.247 |
| chr5:6575888-6575948      | 60  | -4.3  | -0.247 |
| chrX:89367675-89367745    | 70  | -5.33 | -0.247 |
| chr6:64042808-64042819    | 11  | -5.51 | -0.247 |
| chr16:14879610-14879710   | 100 | -4.17 | -0.248 |
| chr5:178744620-178744719  | 99  | -5.29 | -0.248 |
| chr21:35303743-35303779   | 36  | -4.59 | -0.249 |
| chr10:133953880-133954056 | 176 | -6.41 | -0.249 |
| chr16:50300426-50300512   | 86  | -4.47 | -0.249 |
| chr6:104143646-104143701  | 55  | -4.03 | -0.25  |
| chr8:92540044-92540096    | 52  | -4.2  | -0.25  |
| chr1:15127613-15127629    | 16  | -4.49 | -0.25  |
| chr1:1962485-1962538      | 53  | -4.6  | -0.25  |
| chr1:41303941-41304040    | 99  | -5.51 | -0.25  |
| chr3:140795794-140795874  | 80  | -6.09 | -0.25  |
| chr9:70638601-70638697    | 96  | -8    | -0.25  |
| chrY:9930147-9930241      | 94  | -6.54 | -0.251 |
| chr20:59934298-59934404   | 106 | -6.18 | -0.251 |
| chr5:140480793-140480941  | 148 | -4.45 | -0.251 |
| chr3:119689488-119689591  | 103 | -4.72 | -0.252 |
| chr1:106926066-106926108  | 42  | -5.26 | -0.252 |
| chr16:29141844-29141916   | 72  | -5.51 | -0.252 |
| chr16:936981-936994       | 13  | -4.36 | -0.253 |
| chr4:1661932-1662028      | 96  | -4.41 | -0.253 |

|                           |     |       |        |
|---------------------------|-----|-------|--------|
| chr1:7496256-7496365      | 109 | -4.47 | -0.253 |
| chr17:72443154-72443226   | 72  | -5.33 | -0.253 |
| chr14:105622188-105622281 | 93  | -8.1  | -0.253 |
| chr17:63859605-63859734   | 129 | -8.62 | -0.254 |
| chr10:134908989-134909025 | 36  | -4.96 | -0.254 |
| chr8:4256117-4256213      | 96  | -5.3  | -0.254 |
| chr3:177687266-177687330  | 64  | -5    | -0.254 |
| chr1:200983236-200983361  | 125 | -5.37 | -0.255 |
| chr18:77219013-77219065   | 52  | -4.43 | -0.255 |
| chr6:28983065-28983145    | 80  | -6.27 | -0.256 |
| chr3:75655039-75655096    | 57  | -6.94 | -0.256 |
| chr22:34060780-34060830   | 50  | -5.19 | -0.256 |
| chr20:58062070-58062146   | 76  | -4.45 | -0.257 |
| chr18:76695274-76695360   | 86  | -4.59 | -0.257 |
| chr13:67197103-67197167   | 64  | -4.12 | -0.258 |
| chr1:155075632-155075728  | 96  | -4.34 | -0.258 |
| chr8:4449397-4449533      | 136 | -4.78 | -0.258 |
| chr19:4767032-4767099     | 67  | -5.02 | -0.258 |
| chr22:49387233-49387284   | 51  | -5.98 | -0.258 |
| chr5:150834295-150834367  | 72  | -6.67 | -0.258 |
| chr18:77543073-77543164   | 91  | -5.55 | -0.258 |
| chr14:104675098-104675132 | 34  | -5.48 | -0.258 |
| chr9:72092274-72092318    | 44  | -5.55 | -0.258 |
| chr7:22398163-22398249    | 86  | -6.15 | -0.258 |
| chr15:62516340-62516426   | 86  | -6.64 | -0.26  |
| chr2:154870076-154870114  | 38  | -4.01 | -0.26  |
| chr4:46285822-46285862    | 40  | -4.14 | -0.26  |
| chr7:100887197-100887280  | 83  | -4.27 | -0.26  |
| chr22:40026448-40026532   | 84  | -4.63 | -0.26  |
| chr8:139833558-139833618  | 60  | -5.02 | -0.26  |
| chr15:84547091-84547150   | 59  | -5.05 | -0.26  |
| chr13:112758807-112758897 | 90  | -6.52 | -0.26  |
| chr10:132099227-132099372 | 145 | -7.16 | -0.261 |
| chr19:29931151-29931222   | 71  | -4.53 | -0.262 |
| chr13:107668933-107668989 | 56  | -5.14 | -0.262 |
| chr8:9006632-9006689      | 57  | -6.26 | -0.262 |
| chr13:112914805-112914895 | 90  | -6.35 | -0.262 |
| chr9:130498662-130498694  | 32  | -4.35 | -0.262 |
| chr1:165325237-165325258  | 21  | -4.46 | -0.263 |
| chr16:5459814-5459878     | 64  | -5.28 | -0.263 |
| chr10:134218212-134218301 | 89  | -4.75 | -0.263 |

|                           |     |       |        |
|---------------------------|-----|-------|--------|
| chr13:114805144-114805226 | 82  | -6.2  | -0.264 |
| chr12:101826285-101826337 | 52  | -4.05 | -0.264 |
| chrX:80699438-80699474    | 36  | -4.35 | -0.264 |
| chr20:56138380-56138432   | 52  | -4.04 | -0.265 |
| chr7:150094391-150094488  | 97  | -4.21 | -0.266 |
| chr11:68622202-68622275   | 73  | -4.88 | -0.266 |
| chr12:22488267-22488369   | 102 | -4.32 | -0.266 |
| chr5:17924748-17924781    | 33  | -4.28 | -0.267 |
| chr17:4439681-4439755     | 74  | -4.55 | -0.267 |
| chr11:16755338-16755390   | 52  | -4.83 | -0.267 |
| chr20:16618712-16618808   | 96  | -4.03 | -0.268 |
| chr22:20219134-20219210   | 76  | -4.14 | -0.268 |
| chr19:3793279-3793329     | 50  | -4.27 | -0.268 |
| chr1:2490086-2490148      | 62  | -4.43 | -0.268 |
| chr7:152419446-152419510  | 64  | -4.95 | -0.268 |
| chr12:114886100-114886177 | 77  | -4.08 | -0.268 |
| chr19:57351921-57352012   | 91  | -8.61 | -0.269 |
| chr16:78549043-78549099   | 56  | -4.51 | -0.27  |
| chrX:95318546-95318610    | 64  | -4.62 | -0.27  |
| chr5:71716018-71716094    | 76  | -4.73 | -0.27  |
| chr9:133072284-133072340  | 56  | -4.88 | -0.27  |
| chr11:126048090-126048144 | 54  | -5.01 | -0.27  |
| chrX:117597170-117597242  | 72  | -5.4  | -0.27  |
| chr4:39790059-39790173    | 114 | -5.68 | -0.271 |
| chr19:41354528-41354605   | 77  | -5.83 | -0.272 |
| chrX:37291580-37291619    | 39  | -4.75 | -0.272 |
| chr11:2050599-2050746     | 147 | -4.19 | -0.273 |
| chr8:145024948-145025047  | 99  | -7.05 | -0.273 |
| chrX:39864845-39864932    | 87  | -4.5  | -0.273 |
| chr10:3864275-3864344     | 69  | -4.22 | -0.274 |
| chr16:1261313-1261355     | 42  | -4.72 | -0.274 |
| chr20:43384033-43384106   | 73  | -4.3  | -0.275 |
| chr2:175198662-175198716  | 54  | -5.71 | -0.275 |
| chrX:12804860-12804908    | 48  | -4.1  | -0.276 |
| chr8:53852850-53852893    | 43  | -4.15 | -0.276 |
| chr18:10699012-10699097   | 85  | -5.01 | -0.276 |
| chr19:545597-545627       | 30  | -4.45 | -0.277 |
| chr4:30242485-30242494    | 9   | -4.02 | -0.278 |
| chr14:105944277-105944310 | 33  | -4.81 | -0.278 |
| chr1:143277220-143277269  | 49  | -7.43 | -0.278 |
| chr4:177613470-177613542  | 72  | -4.72 | -0.279 |

|                           |     |       |        |
|---------------------------|-----|-------|--------|
| chr7:1351474-1351616      | 142 | -6.08 | -0.279 |
| chr8:143441863-143441933  | 70  | -4.19 | -0.28  |
| chr10:36179010-36179151   | 141 | -6.25 | -0.282 |
| chr5:171756786-171756837  | 51  | -5.11 | -0.282 |
| chr14:74179570-74179661   | 91  | -5.63 | -0.282 |
| chr2:152961720-152961821  | 101 | -4.99 | -0.282 |
| chr4:3311613-3311629      | 16  | -4.85 | -0.283 |
| chrX:79470409-79470441    | 32  | -4.86 | -0.283 |
| chr20:45380395-45380441   | 46  | -5.09 | -0.283 |
| chr3:57306847-57306923    | 76  | -4.78 | -0.283 |
| chr4:987716-987799        | 83  | -4.26 | -0.284 |
| chr12:131930990-131931047 | 57  | -4.69 | -0.285 |
| chr1:228522449-228522542  | 93  | -5.37 | -0.285 |
| chr20:23589052-23589096   | 44  | -4.3  | -0.285 |
| chr22:21200265-21200311   | 46  | -4.36 | -0.287 |
| chr21:47374565-47374584   | 19  | -6.2  | -0.288 |
| chr18:66475914-66475957   | 43  | -4.39 | -0.288 |
| chr2:35620690-35620753    | 63  | -5.53 | -0.288 |
| chr17:239946-240026       | 80  | -4.48 | -0.288 |
| chr4:64215182-64215228    | 46  | -4.63 | -0.289 |
| chr10:97657162-97657232   | 70  | -5.36 | -0.289 |
| chrX:130518035-130518166  | 131 | -9.15 | -0.289 |
| chr22:26148176-26148224   | 48  | -5.07 | -0.29  |
| chr21:21272770-21272822   | 52  | -5.05 | -0.29  |
| chr6:168963374-168963449  | 75  | -5.66 | -0.29  |
| chrY:24513251-24513347    | 96  | -5.1  | -0.291 |
| chr13:76869303-76869359   | 56  | -5.42 | -0.292 |
| chr13:112910306-112910394 | 88  | -6.73 | -0.292 |
| chr19:2864472-2864519     | 47  | -5.31 | -0.292 |
| chr4:7210967-7210986      | 19  | -4.16 | -0.292 |
| chr20:56146504-56146536   | 32  | -6.05 | -0.293 |
| chr6:43251562-43251641    | 79  | -6.24 | -0.293 |
| chr1:32149708-32149737    | 29  | -4.5  | -0.295 |
| chr4:187850689-187850731  | 42  | -4.58 | -0.295 |
| chr19:1288314-1288406     | 92  | -5.23 | -0.295 |
| chr5:3417899-3417978      | 79  | -5.97 | -0.295 |
| chr5:77147541-77147584    | 43  | -5.14 | -0.296 |
| chr17:56582885-56582981   | 96  | -4.44 | -0.296 |
| chr12:46019713-46019814   | 101 | -6.07 | -0.297 |
| chr12:55877893-55877985   | 92  | -5.1  | -0.298 |
| chr12:30975777-30975867   | 90  | -7.85 | -0.299 |



|                           |     |       |        |
|---------------------------|-----|-------|--------|
| chr22:26385468-26385564   | 96  | -6.17 | -0.299 |
| chr9:137483793-137483883  | 90  | -5.41 | -0.3   |
| chr4:91602556-91602604    | 48  | -5.78 | -0.3   |
| chr1:1657004-1657076      | 72  | -6.07 | -0.3   |
| chr3:58828132-58828184    | 52  | -5.52 | -0.302 |
| chr8:143443158-143443220  | 62  | -4.24 | -0.302 |
| chr14:101017568-101017686 | 118 | -4.37 | -0.302 |
| chr14:101048245-101048330 | 85  | -4.45 | -0.304 |
| chr7:644981-645070        | 89  | -5.18 | -0.304 |
| chr11:132813039-132813074 | 35  | -4.63 | -0.304 |
| chr11:128694465-128694522 | 57  | -4.19 | -0.305 |
| chr11:613954-613991       | 37  | -4.23 | -0.305 |
| chr12:122107244-122107335 | 91  | -7.16 | -0.306 |
| chr18:77609973-77610028   | 55  | -5.73 | -0.306 |
| chr8:101117950-101118030  | 80  | -4.77 | -0.31  |
| chr17:77242960-77243037   | 77  | -4.04 | -0.31  |
| chr11:11054422-11054449   | 27  | -4.14 | -0.31  |
| chr14:72220828-72220864   | 36  | -8.02 | -0.31  |
| chr2:207036664-207036732  | 68  | -5.23 | -0.311 |
| chr2:71123889-71123943    | 54  | -5.24 | -0.312 |
| chr4:1538214-1538266      | 52  | -4.44 | -0.312 |
| chr14:106286035-106286084 | 49  | -4.85 | -0.312 |
| chrY:6134944-6135074      | 130 | -6.11 | -0.313 |
| chr18:27679771-27679789   | 18  | -4.89 | -0.315 |
| chr7:140039738-140039834  | 96  | -5.37 | -0.315 |
| chr10:55064010-55064097   | 87  | -4.77 | -0.316 |
| chr16:86527816-86527901   | 85  | -6.52 | -0.317 |
| chrX:69353825-69353870    | 45  | -5.71 | -0.32  |
| chr2:1554832-1554870      | 38  | -5.06 | -0.32  |
| chr4:127121663-127121716  | 53  | -6.68 | -0.32  |
| chr14:77960320-77960416   | 96  | -5.88 | -0.321 |
| chr1:245753601-245753635  | 34  | -5.5  | -0.322 |
| chr16:1580749-1580823     | 74  | -4.62 | -0.323 |
| chr19:39899218-39899299   | 81  | -4.23 | -0.323 |
| chr15:75987122-75987203   | 81  | -4.75 | -0.324 |
| chr16:1991283-1991327     | 44  | -7.05 | -0.324 |
| chr12:51965400-51965482   | 82  | -4.12 | -0.325 |
| chr9:71732632-71732704    | 72  | -4.82 | -0.326 |
| chr8:114389118-114389207  | 89  | -5.76 | -0.327 |
| chr1:4623422-4623508      | 86  | -4.73 | -0.33  |
| chr5:10533558-10533655    | 97  | -7.7  | -0.33  |

|                           |     |       |        |
|---------------------------|-----|-------|--------|
| chr14:105864119-105864204 | 85  | -4.93 | -0.332 |
| chr13:48892382-48892474   | 92  | -5.43 | -0.332 |
| chr11:2113757-2113931     | 174 | -7.9  | -0.332 |
| chr2:130444230-130444292  | 62  | -4.71 | -0.332 |
| chr22:49635103-49635124   | 21  | -4.94 | -0.332 |
| chr12:56628651-56628739   | 88  | -6.46 | -0.333 |
| chr19:47621448-47621537   | 89  | -6.6  | -0.333 |
| chr3:111718467-111718519  | 52  | -4.2  | -0.336 |
| chr13:107827269-107827301 | 32  | -4.68 | -0.336 |
| chr16:65732297-65732356   | 59  | -4.95 | -0.336 |
| chr6:19704589-19704661    | 72  | -5.19 | -0.338 |
| chr20:62173761-62173812   | 51  | -7.73 | -0.338 |
| chr13:100219304-100219397 | 93  | -4.91 | -0.34  |
| chr11:68811737-68811759   | 22  | -4.87 | -0.34  |
| chr12:87316718-87316764   | 46  | -5.12 | -0.343 |
| chr11:2103058-2103112     | 54  | -7.36 | -0.343 |
| chr19:407324-407400       | 76  | -5.57 | -0.344 |
| chr18:77905446-77905537   | 91  | -7.52 | -0.346 |
| chr5:1663996-1664036      | 40  | -5.81 | -0.348 |
| chr1:117170223-117170280  | 57  | -6.85 | -0.348 |
| chr1:17367984-17368072    | 88  | -5.54 | -0.348 |
| chr4:177433982-177434022  | 40  | -4.7  | -0.35  |
| chr1:3647830-3647887      | 57  | -5.03 | -0.35  |
| chr19:52206289-52206369   | 80  | -5.3  | -0.35  |
| chr19:1535177-1535205     | 28  | -4.5  | -0.352 |
| chr13:50914873-50914973   | 100 | -5.14 | -0.352 |
| chr19:7891714-7891752     | 38  | -4.07 | -0.355 |
| chr6:86714484-86714560    | 76  | -4.88 | -0.356 |
| chr5:134103829-134103893  | 64  | -4.1  | -0.358 |
| chr16:3641291-3641329     | 38  | -7.32 | -0.358 |
| chr8:16527728-16527809    | 81  | -7.87 | -0.359 |
| chr4:92899617-92899657    | 40  | -4.25 | -0.36  |
| chr6:55234084-55234114    | 30  | -8.42 | -0.362 |
| chr13:113009134-113009215 | 81  | -7.69 | -0.364 |
| chr19:15343867-15343946   | 79  | -4.4  | -0.365 |
| chr7:104988939-104989031  | 92  | -6.87 | -0.365 |
| chr21:10772504-10772580   | 76  | -4.69 | -0.367 |
| chr4:19085246-19085322    | 76  | -5.77 | -0.367 |
| chr19:9204246-9204257     | 11  | -4.39 | -0.367 |
| chr2:199467881-199467916  | 35  | -5.33 | -0.367 |
| chr5:38175326-38175379    | 53  | -4.36 | -0.368 |

|                           |     |        |        |
|---------------------------|-----|--------|--------|
| chr14:104556868-104556890 | 22  | -4.04  | -0.37  |
| chr2:106747579-106747634  | 55  | -4.94  | -0.37  |
| chr11:46542400-46542445   | 45  | -5.18  | -0.37  |
| chr3:10492476-10492553    | 77  | -5.37  | -0.378 |
| chrX:40908514-40908560    | 46  | -4.39  | -0.378 |
| chrX:27416589-27416688    | 99  | -7.05  | -0.378 |
| chr2:101221920-101221992  | 72  | -4.55  | -0.382 |
| chr10:1546732-1546762     | 30  | -4.52  | -0.383 |
| chr10:1230792-1230837     | 45  | -5.58  | -0.384 |
| chr22:43628339-43628410   | 71  | -4.21  | -0.385 |
| chrX:27872445-27872485    | 40  | -4.98  | -0.385 |
| chr3:54319125-54319170    | 45  | -6.37  | -0.387 |
| chr14:48656516-48656592   | 76  | -7.39  | -0.391 |
| chr16:67511722-67511793   | 71  | -4.07  | -0.393 |
| chr4:120036071-120036170  | 99  | -4.44  | -0.394 |
| chr5:1564437-1564483      | 46  | -4.09  | -0.395 |
| chr5:140812550-140812614  | 64  | -4.16  | -0.398 |
| chr7:87681744-87681809    | 65  | -6.14  | -0.4   |
| chr8:112550459-112550486  | 27  | -4.51  | -0.405 |
| chr11:1103789-1103847     | 58  | -4.93  | -0.405 |
| chr14:19552727-19552828   | 101 | -10.2  | -0.407 |
| chr8:50482399-50482459    | 60  | -4.93  | -0.407 |
| chr20:23733222-23733328   | 106 | -5.62  | -0.42  |
| chr3:192358993-192359105  | 112 | -9.23  | -0.424 |
| chr3:142666208-142666298  | 90  | -10.35 | -0.43  |
| chr21:42218928-42219029   | 101 | -10.01 | -0.436 |
| chr2:86888084-86888136    | 52  | -5.37  | -0.44  |
| chr8:142633422-142633489  | 67  | -5.94  | -0.446 |
| chr5:756251-756344        | 93  | -4.22  | -0.45  |
| chr9:137126619-137126636  | 17  | -4.94  | -0.45  |
| chr17:42392155-42392208   | 53  | -6.19  | -0.452 |
| chr12:13715925-13715942   | 17  | -4.36  | -0.463 |
| chr2:194445095-194445179  | 84  | -8.71  | -0.463 |
| chr8:54506795-54506873    | 78  | -5.07  | -0.466 |
| chr2:237214422-237214453  | 31  | -6.52  | -0.473 |
| chr10:74304021-74304057   | 36  | -4.25  | -0.488 |
| chr2:30216490-30216551    | 61  | -5.64  | -0.497 |
| chr6:3225061-3225127      | 66  | -6.38  | -0.505 |
| chr11:4258811-4258864     | 53  | -4.42  | -0.512 |
| chr2:171573980-171574053  | 73  | -5.2   | -0.518 |

**associated\_gene(s)**

LOC101929387(pmt,NR\_110946),LOC101929387(pmt,NR\_110945),LMF1(NM\_022773),LMF1(NR\_0336

MBD5(NM\_018328),  
ESYT2(NM\_020728),  
CHADL(NM\_138481),

FAM27E2(pmt,NR\_103714),

ZBTB7A(NM\_015898),  
OSR2(NM\_001286841),OSR2(NM\_053001),OSR2(NM\_001142462),

KIF26B(NM\_018012),  
HIST1H4I(NM\_003495),HIST1H2BK(NM\_080593),

OTOA(NM\_144672),OTOA(NM\_001161683),OTOA(NM\_170664),  
GRAMD4(pmt,NM\_015124),

EXOC3L4(NM\_001077594),

MUC2(NM\_002457),  
KCNN4(NM\_002250),  
SHC4(NM\_203349),

TRMT2B(pmt,NM\_024917),TRMT2B(pmt,NM\_001167972),TRMT2B(pmt,NM\_001167971),TRMT2B(pmt,NM\_001167970),  
MSRA(NM\_012331),MSRA(NM\_001135671),MSRA(NM\_001135670),MSRA(NM\_001199729),  
GPR123(NM\_001083909),GPR123(NM\_001291085),

COL23A1(NM\_173465),

LOC101929387(NR\_110946),LMF1(NR\_033646),LOC101929387(NR\_110945),LMF1(NR\_033645),LMF1(TTC40(NM\_001200049),

ADARB2(NM\_018702),

CELSR1(NM\_014246),

CRYZL1(NM\_145858),  
PFKFB3(NM\_001282630),PFKFB3(NM\_001145443),PFKFB3(NM\_004566),

KCNQ1(NM\_181798),KCNQ1(NM\_000218),

SLC7A5P2(pmt,NR\_002594),

PRSS33(NM\_152891),  
STK10(NM\_005990),

ZBTB7C(NM\_001039360),

PDE9A(NM\_001001578),PDE9A(NM\_001001579),PDE9A(NM\_001001585),PDE9A(NM\_001001577),PD

MAGI1(NM\_001033057),MAGI1(NM\_015520),MAGI1(NM\_004742),  
ARHGAP39(NM\_025251),  
C1QTNF8(pmt,NM\_207419),

TNRC18(NM\_001080495),  
DGKK(NM\_001013742),

ANKRD27(NM\_032139),

KCNT1(NM\_001272003),KCNT1(NM\_020822),  
TGFB3(NM\_003239),  
EXO1(NM\_130398),EXO1(NM\_003686),EXO1(NM\_006027),

GABRB3(NM\_001278631),GABRB3(NM\_021912),GABRB3(NM\_000814),GABRB3(NM\_001191320),

SOX13(NM\_005686),  
GJB6(NM\_001110221),GJB6(NM\_001110219),GJB6(NM\_001110220),GJB6(NM\_006783),  
HOXA7(pmt,NM\_006896),  
CUX1(NM\_001202546),CUX1(NM\_001913),CUX1(NM\_181500),CUX1(NM\_001202545),CUX1(NM\_0012  
OTOG(NM\_001277269),  
PRPSAP1(NM\_002766),  
JRKL-AS1(pmt,NR\_047481),  
ZNF232(NM\_014519),

KLHL29(NM\_052920),  
DGKZ(NM\_001105540),DGKZ(NM\_201532),DGKZ(NM\_201533),DGKZ(NM\_001199267),DGKZ(NM\_001  
SMARCA1(NM\_003069),SMARCA1(NM\_001282874),SMARCA1(NM\_001282875),  
HOXB-AS3(NR\_033201),HOXB6(NM\_018952),HOXB5(pmt,NM\_002147),HOXB-AS3(NR\_033203),HOXB-  
LINGO2(pmt,NM\_001258282),

ACYP2(NM\_138448),  
GPR1-AS(NR\_104359),GPR1(NM\_001261452),GPR1(NM\_001098199),GPR1(NM\_001261453),GPR1(NM  
PLXND1(NM\_015103),  
PYY(pmt,NM\_004160),NAGS(NM\_153006),

KRT19(pmt,NM\_002276),

HOXD-AS1(pmt,NR\_110460),HOXD-AS1(pmt,NR\_110461),HOXD-AS1(pmt,NR\_110466),HOXD1(NM\_02  
KIF7(NM\_198525),

TTL(NM\_153712),  
ZEB2(NM\_014795),ZEB2(NM\_001171653),  
MIR5009(NR\_049807),

NRG3(pmt,NM\_001165973),NRG3(NM\_001165972),NRG3(NM\_001010848),  
SRMS(NM\_080823),PTK6(pmt,NM\_001256358),PTK6(pmt,NM\_005975),  
MIR4500HG(NR\_033829),

TTY23B(pmt,NR\_003593),TTY23(pmt,NR\_001540),

USP40(NM\_018218),  
DAPK3(NM\_001348),MIR637(pmt,NR\_030367),  
ZNF596(pmt,NM\_001287254),ZNF596(pmt,NM\_001287255),ZNF596(pmt,NM\_001042415),ZNF596(pmt,NM\_001282849),RGN(pmt,NM\_004683),RGN(pmt,NM\_152869),RGN(pmt,NM\_001282848),  
CSMD1(NM\_033225),  
CAPS(NM\_080590),CAPS(NM\_004058),  
DACT1(pmt,NR\_046093),  
DIAPH2(NM\_007309),DIAPH2(NM\_006729),  
ZNF503-AS2(pmt,NR\_110300),ZNF503-AS2(pmt,NR\_110301),ZNF503-AS2(pmt,NR\_024421),ZNF503-AS  
TET1(NM\_030625),

CTSLP2(NR\_033407),  
FGF22(NM\_020637),

IGDCC4(NM\_020962),  
FCER1A(pmt,NM\_002001),  
FCGBP(NM\_003890),  
IQCD(NM\_138451),  
TTY23B(pmt,NR\_003593),TTY23(pmt,NR\_001540),  
LOC441666(NR\_024380),  
LOC650293(pmt,NM\_001040071),

NRN1(NM\_001278711),NRN1(NM\_016588),NRN1(NM\_001278710),  
ZIC1(NM\_003412),

GNA12(NM\_007353),GNA12(NM\_001282441),GNA12(NM\_001282440),

TTC28(NM\_001145418),

MBNL3(NM\_001170704),

SRSF1(pmt,NR\_034041),SRSF1(pmt,NM\_006924),SRSF1(pmt,NM\_001078166),

LMF1(pmt,NR\_036442),LMF1(pmt,NR\_033645),SOX8(NM\_014587),

TCEA2(pmt,NM\_198723),

TNKS(NM\_003747),

ACSS3(pmt,NM\_024560),

DLL1(NM\_005618),FAM120B(pmt,NM\_001286379),

TBC1D32(NM\_152730),TBC1D32(NR\_104452),

CARD11(NM\_032415),

PRDM16(NM\_022114),PRDM16(NM\_199454),

LYPD1(NM\_001077427),LYPD1(NM\_144586),

F7(NM\_001267554),F7(NR\_051961),F7(NM\_019616),F7(NM\_000131),

LRP2(NM\_004525),

PGF(NM\_001207012),PGF(NM\_002632),

FGF13(NM\_001139500),FGF13(NM\_001139498),FGF13(NM\_001139501),

HECW1(NM\_001287059),HECW1(NM\_015052),

TTC40(NM\_001200049),

SDHA(NM\_004168),CCDC127(pmt,NM\_145265),

SPIRE2(NM\_032451),

ABHD17A(NM\_031213),ABHD17A(NM\_001130111),



CLDN23(NM\_194284),

MEGF11(NM\_032445),

MORN1(NM\_024848),

NTSR1(NM\_002531),

GNA11(NM\_002067),

GALNT9(NM\_001122636),

PRDM16(NM\_022114),PRDM16(NM\_199454),

ESRRG(NM\_001134285),ESRRG(NM\_001243509),ESRRG(NM\_206595),ESRRG(NM\_001243506),ESRRG(

COL5A1(NM\_000093),COL5A1(NM\_001278074),

WSCD2(NM\_014653),

CFLAR(pmt,NM\_001202517),CFLAR(pmt,NM\_001202516),CFLAR(pmt,NM\_001202519),CFLAR(pmt,NM

MRPL23-AS1(pmt,NR\_024471),

ANKRD30B(pmt,NM\_001145029),

MRC1(NM\_002438),

SARM1(NM\_015077),

DLG3(NM\_021120),DLG3-AS1(pmt,NR\_046586),DLG3(NM\_020730),DLG3(NM\_001166278),DLG3-AS1(I

SSH1(NM\_018984),SSH1(NM\_001161330),

MYO9B(NM\_004145),MYO9B(NM\_001130065),

SYNGR1(NM\_145731),SYNGR1(NM\_004711),

PTPRN2(NM\_130842),PTPRN2(NM\_130843),PTPRN2(NM\_002847),

CACNA1H(NM\_021098),CACNA1H(NM\_001005407),

LARS(pmt,NM\_020117),

PTGER4(NM\_000958),

SPACA6P(NR\_024330),

TNN(NM\_022093),

KCTD5(NM\_018992),  
RAC2(NM\_002872),  
DOK6(NM\_152721),

HEATR2(NR\_075098),HEATR2(NM\_017802),  
HSD17B6(NM\_003725),  
MUC6(NM\_005961),  
TSPAN9(NM\_001168320),TSPAN9(NM\_006675),

FAM153A(pmt,NM\_173663),

ABI3(NM\_016428),ABI3(NM\_001135186),

KCNT1(NM\_001272003),KCNT1(NM\_020822),  
ZCCHC4(NM\_024936),  
ZCCHC3(pmt,NM\_033089),

FIRRE(NR\_026975),

PKP4(NM\_003628),PKP4(NM\_001005476),  
MCF2L(NM\_001112732),  
XRCC6P5(NR\_024608),  
KLHL26(NM\_018316),  
NBPF20(NM\_001278267),NBPF10(NM\_001039703),PIAS3(pmt,NM\_006099),

TBX5(pmt,NM\_000192),TBX5(pmt,NM\_080717),TBX5-AS1(NR\_038440),TBX5(pmt,NM\_181486),  
EVI5L(NM\_145245),EVI5L(NM\_001159944),

ADAP1(pmt,NM\_001284309),ADAP1(NM\_001284308),ADAP1(NM\_006869),  
ALOX5(NM\_000698),ALOX5(NM\_001256153),ALOX5(NM\_001256154),

RAB3IP(NR\_103520),RAB3IP(NR\_103519),RAB3IP(NM\_022456),RAB3IP(NM\_175624),RAB3IP(NM\_175624),  
ESPNNP(pmt,NR\_026567),

VIPR2(pmt,NM\_003382),  
MIR1256(NR\_031657),

NUTM2D(NR\_075100),  
UBR3(NM\_172070),  
FZD5(NM\_003468),

NOS3(NM\_000603),

NTSR1(pmt,NM\_002531),  
PTPRO(NM\_030667),PTPRO(NM\_002848),

NBPF25P(NR\_104217),NBPF12(NM\_001278141),NBPF20(NM\_001278267),NBPF10(NM\_001039703),  
SRC(NM\_198291),SRC(NM\_005417),  
FLJ45974(NR\_038371),  
LSP1(NM\_002339),LSP1(NM\_001013253),LSP1(pmt,NM\_001013254),LSP1(pmt,NM\_001013255),LSP1(

PCDHGA1(NM\_018912),PCDHGA11(NM\_032092),PCDHGB2(NM\_018923),PCDHGA6(NM\_018919),PCD  
ARMC3(NM\_001282745),ARMC3(NM\_001282747),ARMC3(NM\_001282746),ARMC3(NM\_173081),  
ZNF678(NM\_178549),ZNF678(NR\_102302),ZNF678(NR\_033184),  
MIR3675(pmt,NR\_037446),  
U2AF2(pmt,NM\_007279),U2AF2(pmt,NM\_001012478),CCDC106(NM\_013301),

LOC646862(NM\_001195135),  
ASPG(NM\_001080464),

ADAMTS2(NM\_021599),ADAMTS2(NM\_014244),  
POF1B(NM\_024921),

MIER2(NM\_017550),

TNRC6B(NM\_001024843),  
PRMT7(NM\_001184824),PRMT7(NM\_019023),PRMT7(NM\_001290018),  
NRG3(NM\_001165973),NRG3(NM\_001165972),NRG3(NM\_001010848),  
PLEKHA6(pmt,NM\_014935),  
CASR(pmt,NM\_001178065),CASR(pmt,NM\_000388),  
COL6A2(NM\_058175),COL6A2(NM\_058174),COL6A2(NM\_001849),  
PRAC2(pmt,NM\_001282275),PRAC2(pmt,NM\_001282276),  
MCF2L(NM\_001112732),

OPCML(NM\_001012393),

LOC441666(NR\_024380),  
NLGN4Y(NM\_014893),NLGN4Y(NR\_028319),NLGN4Y(NR\_046355),NLGN4Y(NM\_001206850),

ITGAX(pmt,NM\_000887),ITGAX(pmt,NM\_001286375),  
NUP62CL(NM\_017681),NUP62CL(NR\_033676),

MRPL23-AS1(pmt,NR\_024471),  
PRKAG2(NM\_001040633),PRKAG2(NM\_016203),  
CPXM1(NM\_019609),CPXM1(NM\_001184699),  
TDRD10(NM\_001098475),TDRD10(NM\_182499),SHE(pmt,NM\_001010846),  
STK11(NM\_000455),

ZAP70(NM\_001079),  
HCG27(pmt,NR\_026791),  
CACNA1I(NM\_001003406),CACNA1I(NM\_021096),  
ADORA2B(NM\_000676),  
TMEM45B(NM\_138788),  
MYO18B(NM\_032608),  
BMP8A(NM\_181809),  
HMX2(NM\_005519),

RNU6-53P(NR\_046928),

LOC100129917(pmt,NR\_036512),LOC100129917(pmt,NR\_036511),CPLX1(NM\_006651),  
IGSF5(NM\_001080444),

LRG1(pmt,NM\_052972),SEMA6B(NM\_032108),  
NBPF20(NM\_001278267),NBPF10(NM\_001039703),POLR3GL(NM\_032305),

WDR37(NM\_014023),

PARVB(NM\_001243385),PARVB(NM\_001003828),PARVB(NM\_001243386),PARVB(NM\_013327),

ANTXR2(NM\_058172),ANTXR2(NM\_001286780),ANTXR2(NM\_001286781),  
LDLRAD4(NM\_181482),LDLRAD4(NM\_181481),  
AGRN(NM\_198576),  
NKX1-2(NM\_001146340),  
DLX1(pmt,NM\_178120),METAP1D(NM\_199227),DLX1(pmt,NM\_001038493),  
WDR66(pmt,NM\_144668),WDR66(pmt,NM\_001178003),  
NFATC1(NM\_172388),NFATC1(NM\_006162),NFATC1(NM\_172389),NFATC1(NM\_001278673),NFATC1(NM\_001105521),

GCM2(NM\_004752),  
COL28A1(NM\_001037763),

COL6A2(NM\_058175),COL6A2(NM\_058174),COL6A2(NM\_001849),  
EXOC3L4(NM\_001077594),

GPR133(NM\_198827),  
DAGLA(NM\_006133),

TFAP2B(NM\_003221),

CCDC185(NM\_152610),

SPEG(NM\_005876),

TMEM132D(NM\_133448),

LRBA(NM\_001199282),LRBA(NM\_006726),MAB21L2(pmt,NM\_006439),  
GHRH(pmt,NM\_021081),GHRH(pmt,NM\_001184731),  
FUZ(NM\_025129),FUZ(NM\_001171937),FUZ(NR\_033269),

MIR6719(pmt,NR\_106777),DYRK1B(NM\_004714),DYRK1B(NM\_006483),DYRK1B(NM\_006484),

COL24A1(pmt,NM\_152890),

FENDRR(pmt,NR\_036444),FOXF1(NM\_001451),FENDRR(pmt,NR\_033925),

SHC2(NM\_012435),

GAGE1(NR\_102272),GAGE1(NM\_001040663),

MAST4(NM\_001164664),MAST4(NM\_001290228),MAST4(NM\_198828),  
BRISK2(NM\_001282218),BRISK2(NM\_001256627),BRISK2(NM\_001256629),BRISK2(NR\_046331),BRISK2(NI  
RAI1(NM\_030665),  
OOSP2(NM\_173801),

SLC29A4(NM\_001040661),SLC29A4(NM\_153247),

LOC340357(NR\_015383),LINC00681(NR\_102423),  
PTPRS(NM\_130853),PTPRS(NM\_002850),PTPRS(NM\_130854),PTPRS(NM\_130855),  
PALLD(NM\_001166109),PALLD(NM\_001166108),PALLD(NM\_001166110),PALLD(NM\_016081),

BCOR(NM\_001123383),BCOR(NM\_001123384),BCOR(NM\_017745),BCOR(NM\_001123385),

ZNF280C(NM\_017666),

KIAA1751(NM\_001080484),

DPYS(NM\_001385),

PRKAR1B(NM\_002735),PRKAR1B(NM\_001164760),PRKAR1B(NM\_001164762),PRKAR1B(NM\_001164764),

CAMTA1(NM\_015215),

C19orf71(pmt,NM\_001135580),

LOC101928604(NR\_110081),ZBTB46(pmt,NM\_025224),

NFATC1(NM\_172388),NFATC1(NM\_172390),NFATC1(NM\_006162),NFATC1(NM\_172389),NFATC1(NM\_172391),

HOOK2(NM\_001100176),HOOK2(NM\_013312),

SBNO2(NM\_014963),

L3MBTL1(NM\_032107),L3MBTL1(NM\_015478),

PRTN3(pmt,NM\_002777),

KCNQ1(NM\_181798),KCNQ1(NM\_000218),

SLC12A5(NM\_001134771),SLC12A5(NM\_020708),

SYCP2L(pmt,NM\_001040274),GCM2(pmt,NM\_004752),

SIRPA(pmt,NM\_080792),SIRPA(pmt,NM\_001040022),SIRPA(pmt,NM\_001040023),

SYCP2L(pmt,NM\_001040274),GCM2(pmt,NM\_004752),

COL13A1(NM\_080800),COL13A1(NM\_080801),COL13A1(NM\_001130103),COL13A1(NM\_080805),COL13A1(NM\_080806),

INADL(NM\_176877),

EYS(NM\_001142800),

EPS8L1(pmt,NM\_133180),  
KCNK17(NM\_031460),KCNK17(NM\_001135111),  
SPACA6P(NR\_024330),  
SAMD3(NM\_001258275),

LOC728637(NM\_001278059),  
OTX2(pmt,NM\_001270524),OTX2(pmt,NM\_001270523),OTX2(pmt,NR\_073034),OTX2-AS1(pmt,NR\_02!  
ARID5A(NM\_212481),

GLOD4(NM\_016080),RNMTL1(pmt,NM\_018146),  
GFI1(NM\_001127216),GFI1(NM\_001127215),GFI1(NM\_005263),

SH2B2(NM\_020979),  
NEO1(NM\_001172623),NEO1(NM\_002499),NEO1(NM\_001172624),  
PCSK6(NM\_138324),PCSK6(NM\_138325),PCSK6(NM\_138321),PCSK6(NM\_138322),PCSK6(NM\_138323),  
SULT1A1(pmt,NM\_177536),  
AGAP1(pmt,NM\_001037131),AGAP1(pmt,NM\_001244888),AGAP1(pmt,NM\_014914),  
EBF3(NM\_001005463),  
RASA3(NM\_007368),  
CIITA(NM\_001286402),CIITA(NM\_001286403),CIITA(NM\_000246),CIITA(NR\_104444),

CDH11(NM\_001797),  
TSPAN9(NM\_001168320),TSPAN9(NM\_006675),  
GREB1(NM\_033090),GREB1(NM\_014668),GREB1(NM\_148903),  
COL5A1(NM\_000093),COL5A1(NM\_001278074),  
RABGAP1L(NM\_014857),

PHLDB1(NM\_001144759),PHLDB1(NM\_015157),PHLDB1(NM\_001144758),

PRRT1(NM\_030651),PPT2(pmt,NM\_138717),PPT2(pmt,NM\_005155),PPT2-EGFL8(pmt,NR\_037861),PP

VOPP1(NM\_001284283),VOPP1(NM\_001284284),VOPP1(NM\_030796),VOPP1(NM\_001284282),



SCUBE1(NM\_173050),

FAM53A(NM\_001174070),FAM53A(NM\_001013622),  
LRBA(NM\_001199282),LRBA(NM\_006726),MAB21L2(NM\_006439),  
SSH2(NM\_033389),SSH2(NM\_001282129),SSH2(NM\_001282130),SSH2(NM\_001282131),

LINC01250(NR\_110228),

MICALL2(NM\_182924),

TSPAN17(NM\_001006616),TSPAN17(NM\_130465),TSPAN17(NM\_012171),  
NOTCH1(NM\_017617),  
CDH13(NM\_001220488),CDH13(NM\_001220490),CDH13(NM\_001257),CDH13(NM\_001220489),

SLC29A4(NM\_001040661),SLC29A4(NM\_153247),  
LINC00461(NR\_015436),

CASC15(NR\_015410),

VWA1(pmt,NM\_022834),VWA1(pmt,NM\_199121),  
PTPRN2(NM\_130842),PTPRN2(NM\_130843),PTPRN2(NM\_002847),

ZBTB7A(pmt,NM\_015898),  
SLC9A3(NM\_001284351),SLC9A3(NM\_004174),

SPTBN5(NM\_016642),  
MAPK8IP2(NM\_012324),

CAB39(pmt,NM\_001130849),CAB39(pmt,NM\_001130850),CAB39(pmt,NM\_016289),

KCNK3(NM\_002246),

C19orf57(NM\_024323),  
LLGL2(NM\_004524),LLGL2(NM\_001015002),LLGL2(NM\_001031803),

APBB1(NR\_047512),APBB1(NM\_145689),APBB1(NM\_001164),

VEGFC(NM\_005429),

AATK(NM\_001080395),  
SPRED3(pmt,NM\_001042522),SPRED3(pmt,NR\_073032),GGN(NM\_152657),

GABRD(NM\_000815),

C22orf34(NR\_110522),C22orf34(NR\_110523),

MACROD2(NM\_001033087),MACROD2(NM\_080676),  
MCC(NM\_001085377),  
PLXND1(NM\_015103),

LINC00632(NR\_104228),  
SLC7A7(NR\_040448),SLC7A7(NM\_001126106),SLC7A7(NM\_001126105),

ZFHX4(NM\_024721),

PDE6B(NM\_001145291),PDE6B(NM\_000283),

KCNG2(NM\_012283),  
LMF1(NM\_022773),LMF1(NR\_033645),LMF1(NR\_033646),

LIPE-AS1(NR\_073180),LIPE-AS1(NR\_073179),LIPE(NM\_005357),  
GPSM1(NM\_001145638),GPSM1(NM\_015597),

PRKAR1B(NM\_002735),PRKAR1B(NM\_001164760),PRKAR1B(NM\_001164762),PRKAR1B(NM\_001164764),  
TTLL5(NM\_015072),

CDH13(NM\_001220488),CDH13(NM\_001220490),CDH13(NM\_001257),CDH13(NM\_001220489),

PRDM16(NM\_022114),PRDM16(NM\_199454),

TMEM240(NM\_001114748),  
CSMD1(NM\_033225),

OSBP2(NM\_001282739),OSBP2(NM\_030758),OSBP2(NM\_001282738),  
BMF(NM\_033503),BMF(NM\_001003940),BMF(NM\_001003942),BMF(NM\_001003943),  
BMPR1B(NM\_001203),  
FBN3(NM\_032447),  
KCNAB2(NM\_001199863),KCNAB2(NM\_001199860),KCNAB2(NM\_001199861),KCNAB2(NM\_003636),  
ABR(NM\_001159746),ABR(pmt,NM\_021962),

CBFA2T3(NM\_005187),

BCOR(NM\_001123383),BCOR(NM\_001123384),

KEAP1(pmt,NM\_012289),KEAP1(pmt,NM\_203500),

ACOT7(NM\_181864),ACOT7(NM\_007274),  
FLNA(NM\_001110556),FLNA(NM\_001456),

MIR54814(NR\_031690),CNTNAP2(NM\_014141),

PYDC1(pmt,NM\_152901),TRIM72(NM\_001008274),  
CDH2(NM\_001792),  
LARGE(NM\_004737),LARGE(NM\_133642),  
PRKXP1(NR\_073405),

CRISPLD2(NM\_031476),

SDK1(NM\_152744),

MAML1(NM\_014757),  
CDH18(NM\_001167667),CDH18(NM\_004934),

SEC14L5(NM\_014692),

DRAXIN(NM\_198545),  
FAM83F(NM\_138435),

DMKN(NM\_033317),DMKN(NM\_001126058),DMKN(NM\_001190349),DMKN(pmt,NR\_033746),DMKN(  
PRKCZ(NM\_002744),PRKCZ(NM\_001033581),PRKCZ(NM\_001033582),PRKCZ(NM\_001242874),  
LOC101929374(NR\_110538),  
GPR158(NM\_020752),  
UBR4(NM\_020765),  
ADARB1(NR\_073200),ADARB1(NM\_015834),ADARB1(NR\_027674),ADARB1(NM\_001112),ADARB1(NM\_  
SPANXA2-OT1(NR\_037183),

NXN(NM\_001205319),NXN(NM\_022463),

LHX6(NM\_199160),LHX6(NM\_001242334),LHX6(NM\_014368),LHX6(pmt,NM\_001242335),LHX6(NM\_0  
ZNF33B(pmt,NM\_006955),  
CLEC16A(NM\_001243403),CLEC16A(NM\_015226),

GPR123(NM\_001083909),GPR123(NM\_001291085),  
CLEC3A(NM\_001244755),CLEC3A(NM\_005752),  
LARGE(NM\_004737),LARGE(NM\_133642),

IGSF9B(NM\_001277285),  
ZMIZ2(NM\_031449),ZMIZ2(NM\_174929),

SLC17A7(NM\_020309),

AFAP1-AS1(NR\_026892),  
IL2ORB(NM\_144717),

DIO2-AS1(NR\_038355),

C15orf60(NM\_001042367),  
ABLIM2(NM\_001130086),ABLIM2(NM\_001130084),ABLIM2(NM\_001130085),ABLIM2(NM\_001286688  
PKD1L2(NM\_052892),PKD1L2(NM\_001076780),

CSMD1(NM\_033225),  
EBPL(pmt,NM\_001278636),EBPL(pmt,NR\_103802),EBPL(pmt,NR\_103803),EBPL(pmt,NM\_032565),

TSHB(pmt,NM\_000549),  
NCS1(NM\_014286),  
LOC101926987(NR\_109939),  
PRSS57(NM\_214710),

COL5A1(NM\_000093),COL5A1(NM\_001278074),LOC101448202(NR\_103451),  
GRN(pmt,NM\_002087),  
SLC12A7(NM\_006598),  
MALRD1(NM\_001142308),  
ZEB1(NM\_001128128),ZEB1(NM\_030751),ZEB1(NM\_001174093),ZEB1(NM\_001174095),ZEB1(NM\_001  
TNN(NM\_022093),

ABCA2(NM\_212533),ABCA2(NM\_001606),

CACNG2(NM\_006078),  
SSBP3(NM\_145716),SSBP3(NM\_018070),SSBP3(NM\_001009955),

ADARB2(NM\_018702),

MIR6130(NR\_106746),  
FAM47B(NM\_152631),

H19(NR\_002196),

LOC389906(NR\_034031),  
ESPNL(NM\_194312),  
GPR132(NM\_001278694),GPR132(NM\_001278695),GPR132(NM\_013345),GPR132(NM\_001278696),

MED4(NM\_001270629),MED4(NM\_014166),

ADAMTS2(NM\_021599),ADAMTS2(NM\_014244),  
LINC00649(NR\_038883),  
JAKMIP3(NM\_001105521),  
ADCY7(pmt,NM\_001286057),

KAZN(NM\_015209),KAZN(NM\_201628),

KCNQ4(NM\_004700),KCNQ4(NM\_172163),  
SPSB4(NM\_080862),

CDH4(NM\_001794),  
PCDHB3(NM\_018937),  
GSK3B(NM\_001146156),GSK3B(NM\_002093),

LMF1(NM\_022773),LMF1(NR\_033645),LMF1(NR\_033646),  
FAM53A(NM\_001174070),FAM53A(NM\_001013622),

CAMTA1(NM\_015215),  
GPRC5C(NM\_018653),GPRC5C(NM\_022036),  
JAG2(NM\_002226),MIR6765(pmt,NR\_106823),JAG2(NM\_145159),  
CEP112(NM\_145036),CEP112(NM\_001199165),  
GPR123(NM\_001083909),  
CSMD1(NM\_033225),

KIF21B(NM\_001252103),KIF21B(NM\_001252100),KIF21B(NM\_017596),KIF21B(NM\_001252102),  
NFATC1(NM\_172388),NFATC1(NM\_172390),NFATC1(NM\_006162),NFATC1(NM\_172389),NFATC1(NM\_

LARGE(NM\_004737),LARGE(NM\_133642),

PCDH9(NM\_020403),PCDH9(NM\_203487),

CSMD1(NM\_033225),  
MIR7-3(pmt,NR\_029607),MIR7-3HG(pmt,NR\_027148),

SLC36A1(NM\_078483),

APBA1(NM\_001163),  
RAPGEF5(pmt,NM\_012294),

GALNT13(NM\_052917),  
GABRA2(NM\_001114175),GABRA2(NM\_000807),GABRA2(NM\_001286827),  
FIS1(NM\_016068),  
CACNA1I(NM\_001003406),CACNA1I(NM\_021096),  
COL22A1(NM\_152888),  
ADAMTSL3(NM\_207517),

LOC284395(NR\_040029),

PPP1R3B(NM\_001201329),PPP1R3B(NM\_024607),

TOR2A(pmt,NM\_001252021),TOR2A(pmt,NM\_001085347),TOR2A(pmt,NM\_001134430),TOR2A(pmt,N  
LMX1A(NM\_177398),LMX1A(NM\_001174069),

PWWP2B(NM\_001098637),PWWP2B(NM\_138499),

RASA3(NM\_007368),

PCK1(NM\_002591),  
ZNF775(NM\_173680),

ST8SIA1(pmt,NM\_003034),

SPNS2(NM\_001124758),  
C11orf58(pmt,NM\_014267),

MATK(NM\_002378),  
LOC100133445(pmt,NR\_037844),TNFRSF14(NM\_003820),

ZIM2(NM\_001146327),ZIM2(NM\_015363),PEG3(NM\_006210),PEG3(NM\_001146185),MIMT1(pmt,NR\_001146327),WWOX(NM\_016373),

HMCN2(NM\_001291815),

CYP2A6(NM\_000762),  
PRRG1(NM\_001173490),PRRG1(NM\_001173489),PRRG1(NM\_000950),PRRG1(NM\_001173486),PRRG1

PLEC(NM\_000445),PLEC(NM\_201378),PLEC(NM\_201379),PLEC(pmt,NM\_201380),

CACNA1H(NM\_021098),CACNA1H(NM\_001005407),  
RIMS4(NM\_001205317),RIMS4(NM\_182970),  
SP9(pmt,NM\_001145250),  
PRPS2(pmt,NM\_001039091),PRPS2(pmt,NM\_002765),  
NPBWR1(NM\_005285),  
PIEZO2(NM\_022068),  
GZMM(NM\_001258351),GZMM(NM\_005317),

CRIP2(NR\_073081),CRIP2(NM\_001312),CRIP2(NR\_073084),CRIP2(NR\_073083),CRIP2(NR\_073082),CRIP

VEGFC(NM\_005429),



TSNARE1(NM\_145003),

PNMA1(NM\_006029),

RGS12(pmt,NM\_002926),RGS12(pmt,NM\_198229),

ASB14(NM\_130387),ASB14(NM\_001142733),APPL1(NM\_012096),  
SLC26A1(pmt,NM\_134425),SLC26A1(pmt,NM\_022042),SLC26A1(pmt,NM\_213613),IDUA(NR\_110313),I

OBSCN(NM\_001098623),OBSCN(NM\_001271223),OBSCN(NM\_052843),  
CST9(pmt,NM\_001008693),  
PI4KA(NM\_058004),

CCDC102B(NM\_024781),CCDC102B(NM\_001093729),

ENTPD1-AS1(NR\_038444),

MYO18B(NM\_032608),

SMOC2(NM\_001166412),SMOC2(NM\_022138),  
RBM1Y1F(NM\_152585),

ZNF556(pmt,NM\_024967),  
SORCS2(NM\_020777),

TTBK1(NM\_032538),  
COL16A1(NM\_001856),

EFNA2(NM\_001405),  
LINC01019(NR\_033898),

MTMR4(NM\_004687),

MYO18B(NM\_032608),

CCSER1(NM\_001145065),CCSER1(NM\_207491),  
CDK11B(pmt,NM\_033493),CDK11A(pmt,NM\_033529),CDK11B(pmt,NM\_033492),CDK11B(pmt,NM\_03:  
C3orf67-AS1(NR\_110820),C3orf67(NM\_198463),  
TSNARE1(NM\_145003),  
BEGAIN(NM\_001159531),BEGAIN(NM\_020836),

PRKAR1B(NM\_002735),PRKAR1B(NM\_001164759),PRKAR1B(NM\_001164762),PRKAR1B(NM\_00116476:  
OPCML(NM\_001012393),OPCML(pmt,NM\_002545),

IRF7(NM\_004031),IRF7(NM\_001572),IRF7(NM\_004029),  
MORN3(NM\_173855),

RGS22(NM\_001286692),RGS22(pmt,NM\_001286693),RGS22(NM\_015668),  
RBF3X3(NM\_001082575),

VAX2(pmt,NM\_012476),

SLC37A3(NM\_032295),SLC37A3(NM\_207113),SLC37A3(NM\_001287498),

FENDRR(NR\_036444),FENDRR(NR\_033925),  
IGBP1(NM\_001551),

ISM2(NM\_182509),ISM2(NM\_199296),  
KIF26B(NM\_018012),  
TMEM204(NM\_001256541),TMEM204(pmt,NM\_024600),IFT140(NM\_014714),  
ZFP36(NM\_003407),PLEKHG2(pmt,NM\_022835),  
CSPG4(NM\_001897),  
MSRB1(NM\_016332),

TJP2(pmt,NM\_001170414),  
CSMD3(NM\_052900),CSMD3(NM\_198124),CSMD3(NM\_198123),

PACS2(NM\_001243127),PACS2(NM\_015197),TEX22(pmt,NM\_001195082),PACS2(NM\_001100913),  
RB1(NM\_000321),

SLC39A5(NM\_173596),SLC39A5(NM\_001135195),  
ZC3H4(pmt,NM\_015168),  
TAGLN3(NM\_013259),TAGLN3(NM\_001008272),TAGLN3(NM\_001008273),  
FAM155A(NM\_001080396),

SRMS(NM\_080823),

TPCN2(pmt,NM\_139075),

C2CD4C(NM\_001136263),  
PARD6G-AS1(pmt,NR\_028339),PARD6G-AS1(pmt,NR\_028340),

IGSF3(NM\_001007237),IGSF3(NM\_001542),  
SDHB(NM\_003000),

TP73(NM\_001126242),TP73(NM\_001204188),TP73(NM\_005427),TP73(NM\_001204184),TP73(NM\_001204184),  
SPACA6P(NR\_024330),  
PLK5(NM\_001243079),  
DLEU1(NR\_109974),  
EVI5L(pmt,NM\_145245),

DDX46(NM\_014829),  
SLX4(NM\_032444),

GFRAL(NM\_207410),

EPHX3(pmt,NM\_024794),EPHX3(pmt,NM\_001142886),  
SRPK2(NM\_182692),

OR1M1(NM\_001004456),

ASPG(NM\_001080464),  
UXS1(NR\_045607),UXS1(NM\_001253876),UXS1(NM\_001253875),UXS1(NM\_025076),  
AMBRA1(NM\_001267782),AMBRA1(NM\_001267783),AMBRA1(NM\_017749),  
ATP2B2(NM\_001001331),ATP2B2(NM\_001683),

ADARB2(NM\_018702),  
ADARB2(NM\_018702),  
SCUBE1(NM\_173050),

CACNA2D3(NM\_018398),

ATP6V0D1(NM\_004691),

PCDHGA1(NM\_018912),PCDHGA11(NM\_032092),PCDHGB2(NM\_018923),PCDHGA6(NM\_018919),PCD  
ADAM22(NM\_016351),ADAM22(NM\_021721),ADAM22(NM\_004194),ADAM22(NM\_021723),ADAM22

MUC2(NM\_002457),  
POTEG(pmt,NM\_001005356),POTEG(pmt,NR\_027480),

CST1(pmt,NM\_001898),  
FGF12(NM\_004113),

DSCAM(NM\_001389),DSCAM(NM\_001271534),DSCAM(NR\_073202),  
RNF103-CHMP3(NM\_001198954),

RUNDC3A(NM\_001144826),RUNDC3A(NM\_001144825),RUNDC3A(NM\_006695),  
GRIN2B(NM\_000834),

MIR1256(NR\_031657),MICU1(NM\_001195518),MICU1(NM\_006077),

TUBB2B(NM\_178012),

LOC101926913(NR\_110185),SP5(NM\_001003845),LINC01124(pmt,NR\_027433),

45),LMF1(NR\_033646),

t,NM\_001167970),

NM\_022773),

E9A(NM\_001001584),PDE9A(NM\_001001576),PDE9A(NM\_001001582),PDE9A(NM\_001001567).

102543),CUX1(NM\_001202544),CUX1(NM\_181552),

199266),DGKZ(NM\_001199268),DGKZ(NM\_003646),

AS3(NR\_033202),HOXB-AS3(NR\_110331),HOXB-AS3(NR\_033204),HOXB-AS3(NR\_110330),HOXB-AS3(NR\_033203),

1\_001261454),GPR1(NM\_001261455),GPR1(NM\_005279),

14501),HOXD-AS1(pmt,NR\_110465),HOXD-AS1(pmt,NR\_110459),HOXD-AS1(pmt,NR\_033979),

1t,NM\_001287256),ZNF596(pmt,NM\_173539),ZNF596(pmt,NM\_001287399),ZNF596(pmt,NM\_0

2(pmt,NR\_110299),ZNF503-AS2(pmt,NR\_110302),ZNF503-AS2(pmt,NR\_024422),ZNF503(NM\_03





NM\_001243507),ESRRG(NM\_001243510),ESRRG(NM\_001243505),ESRRG(NM\_206594),ESRRG(N

\_003879),CFLAR(pmt,NM\_001127183),CFLAR(pmt,NM\_001127184),

pmt,NR\_109801),

525),RAB3IP(NM\_001278402),RAB3IP(NM\_001024647),RAB3IP(NM\_175623),

NM\_001242932),LSP1(NM\_001289005),

HGA5(NM\_018918),PCDHGB3(NM\_018924),PCDHGA3(NM\_018916),PCDHGB1(NM\_018922),PCF



VM\_172387),NFATC1(NM\_001278672),NFATC1(NM\_001278670),NFATC1(NM\_001278669),

M\_001256630),BRSK2(NM\_003957),

59),PRKAR1B(NM\_001164758),PRKAR1B(NM\_001164761),

\_001278673),NFATC1(NM\_172387),NFATC1(NM\_001278672),NFATC1(NM\_001278670),NFATC1(

13A1(NM\_080802),COL13A1(NM\_080798),



9385),OTX2(pmt,NM\_021728),

),PCSK6(NM\_138319),PCSK6(NM\_001291309),PCSK6(NM\_002570),PCSK6(NM\_138320),

r2(pmt,NM\_001204103),





59),PRKAR1B(NM\_001164758),PRKAR1B(NM\_001164761),

⟨CNAB2(NM\_001199862),KCNAB2(NM\_172130),

NM\_001126056),DMKN(NM\_001190348),DMKN(pmt,NM\_001126059),DMKN(NM\_001126057),

\_001160230),ADARB1(NR\_027672),ADARB1(NR\_027673),ADARB1(NM\_015833),

01242333),

),ABLIM2(NM\_001130083),ABLIM2(NM\_032432),ABLIM2(NM\_001130087),

1174094),ZEB1(NM\_001174096),



\_001278673),NFATC1(NM\_172387),NFATC1(NM\_001278672),NFATC1(NM\_001278670),NFATC1(

IM\_001134431),TOR2A(pmt,NM\_001252018),TOR2A(pmt,NM\_130459),TOR2A(pmt,NM\_00125:



\_024059),PEG3(NM\_001146187),ZIM2(NM\_001146326),PEG3(NM\_001146184),

.(NM\_001142395),

2(NM\_001270837),CRIP2(NR\_073085),CRIP2(NM\_001270841),

IDUA(NM\_000203),

3490),CDK11A(pmt,NM\_024011),CDK11B(pmt,NM\_033487),CDK11B(pmt,NM\_001291345),CDK1

50),PRKAR1B(NM\_001164761),LOC101926963(NR\_110054),LOC101926963(NR\_110055),PRKAR1

1204191),TP73(NM\_001126241),TP73(NM\_001204185),TP73(NM\_001126240),TP73(NM\_00120

HGA5(NM\_018918),PCDHGB3(NM\_018924),PCDHGA3(NM\_018916),PCDHGB1(NM\_018922),PCDHGB2(NM\_021722),



,PDE9A(NM\_001001572),PDE9A(NM\_002606),PDE9A(NM\_001001574),PDE9A(NM\_001001575),

AS3(NR\_110329),HOXB-AS3(NR\_033205),



01042416),RPL23AP53(NR\_003572),

32772),



JM\_001243512),ESRRG(NM\_001243513),ESRRG(NM\_001243514),ESRRG(NM\_001243511),



PHGB4(NM\_003736),PCDHGA7(NM\_018920),PCDHGB7(NM\_018927),PCDHGA12(NM\_003735),P









.NM\_001278669),NFATC1(NM\_001278675),









.DMKN(NM\_001190347),







[NM\_001278669),NFATC1(NM\_001278675),

2023),





.1B(pmt,NM\_033486),CDK11B(pmt,NM\_033488),CDK11B(pmt,NM\_001787),SLC35E2(NM\_00119

.B(NM\_001164758),

4187),TP73(NM\_001204192),TP73(NM\_001204186),TP73(NM\_001204190),TP73(NM\_00120418

PHGB4(NM\_003736),PCDHGA7(NM\_018920),PCDHGB7(NM\_018927),PCDHGA12(NM\_003735),P



.PDE9A(NM\_001001583),PDE9A(NM\_001001568),PDE9A(NM\_001001570),PDE9A(NM\_0010015













CDHGA4(NM\_018917),PCDHGA10(NM\_018913),PCDHGA11(NM\_018914),PCDHGA9(NM\_01892

































19787),CDK11B(pmt,NM\_033489),

39),

'CDHGA4(NM\_018917),PCDHGA10(NM\_018913),PCDHGA11(NM\_018914),PCDHGA9(NM\_01892





71),PDE9A(NM\_001001573),PDE9A(NM\_001001581),PDE9A(NM\_001001580),PDE9A(NM\_001001580)











1),PCDHGA8(NM\_032088),PCDHGB5(NM\_018925),PCDHGA12(NM\_032094),PCDHGA2(NM\_018'





































1),PCDHGA8(NM\_032088),PCDHGB5(NM\_018925),PCDHGA12(NM\_032094),PCDHGA2(NM\_018:





01569),











915),PCDHGB6(NM\_018926),







































915),PCDHGB6(NM\_018926),
