# Supplementary material
Source: PubMed Central journal article supplement (PMC6348426)
Supplement: methylationSupplementaryFile10.pdf [file methylationSupplementaryFile10.pdf]

| <b>Chr</b> | <b>C/G</b> | <b>Pos</b> | <b>f_val</b> | <b>p_val</b> |
|------------|------------|------------|--------------|--------------|
| chr15      | C          | 34516886   | 14.0679933   | 0.000447017  |
| chr15      | C          | 84735281   | 14.07737906  | 0.000445626  |
| chr1       | G          | 34118858   | 14.07882581  | 0.000445411  |
| chr16      | G          | 801280     | 14.08483763  | 0.000444523  |
| chr11      | G          | 1036677    | 14.08653196  | 0.000444273  |
| chr11      | C          | 18735647   | 14.08782271  | 0.000444083  |
| chr4       | C          | 1557061    | 14.08807845  | 0.000444045  |
| chr2       | C          | 86574673   | 14.09345214  | 0.000443254  |
| chr22      | G          | 34060781   | 14.0962584   | 0.000442841  |
| chr6       | C          | 96699884   | 14.09765323  | 0.000442637  |
| chr15      | G          | 70094328   | 14.09771227  | 0.000442628  |
| chr22      | C          | 28700010   | 14.10437462  | 0.000441651  |
| chr8       | G          | 357378     | 14.11213308  | 0.000440516  |
| chr7       | G          | 158186238  | 14.11971229  | 0.00043941   |
| chr5       | G          | 140754810  | 14.12129894  | 0.000439179  |
| chr4       | G          | 183729461  | 14.12164109  | 0.00043913   |
| chr17      | C          | 76042509   | 14.12646686  | 0.000438428  |
| chr1       | G          | 119395384  | 14.12692149  | 0.000438362  |
| chr9       | C          | 136374840  | 14.12970726  | 0.000437957  |
| chr3       | G          | 174123207  | 14.1298419   | 0.000437938  |
| chr19      | C          | 50232422   | 14.13348208  | 0.00043741   |
| chr19      | G          | 56094053   | 14.13475893  | 0.000437225  |
| chrX       | G          | 117691583  | 14.13554122  | 0.000437112  |
| chr22      | G          | 21348950   | 14.13719162  | 0.000436873  |
| chr5       | C          | 178534998  | 14.13790148  | 0.00043677   |
| chr7       | C          | 55842607   | 14.13846529  | 0.000436689  |
| chr13      | C          | 53024771   | 14.13956466  | 0.00043653   |
| chr5       | G          | 14582549   | 14.14344046  | 0.00043597   |
| chr6       | C          | 131371205  | 14.14456313  | 0.000435808  |
| chr16      | C          | 4696553    | 14.15208213  | 0.000434725  |
| chr6       | C          | 92726809   | 14.15246535  | 0.00043467   |
| chr17      | G          | 72296942   | 14.15668699  | 0.000434063  |
| chr22      | G          | 46528848   | 14.15966818  | 0.000433635  |
| chr5       | G          | 1590327    | 14.15993609  | 0.000433597  |
| chr1       | C          | 2575090    | 14.16111899  | 0.000433427  |
| chr5       | C          | 165965106  | 14.162628    | 0.000433211  |
| chr1       | G          | 201113372  | 14.16562826  | 0.000432781  |
| chr22      | C          | 35801469   | 14.16782382  | 0.000432467  |
| chr1       | G          | 204972676  | 14.16955594  | 0.000432219  |
| chr13      | G          | 112521114  | 14.17081528  | 0.000432039  |
| chr12      | C          | 49615425   | 14.17085306  | 0.000432034  |
| chr14      | G          | 26853490   | 14.17452748  | 0.000431509  |

|       |   |           |             |             |
|-------|---|-----------|-------------|-------------|
| chr17 | G | 72281060  | 14.17617619 | 0.000431274 |
| chr15 | C | 22999172  | 14.17998205 | 0.000430732 |
| chr13 | G | 99241953  | 14.18142305 | 0.000430527 |
| chr1  | G | 28013382  | 14.18217964 | 0.000430419 |
| chr1  | G | 2011776   | 14.18910205 | 0.000429436 |
| chr19 | C | 409116    | 14.19042737 | 0.000429248 |
| chr21 | C | 46893292  | 14.19296255 | 0.000428889 |
| chr16 | C | 81741550  | 14.19414326 | 0.000428721 |
| chr21 | G | 37485787  | 14.19954525 | 0.000427957 |
| chr10 | C | 105992429 | 14.20061026 | 0.000427807 |
| chr19 | G | 50040361  | 14.20162217 | 0.000427664 |
| chr16 | G | 4228618   | 14.20231678 | 0.000427566 |
| chr19 | C | 2035445   | 14.20358284 | 0.000427387 |
| chr5  | G | 16787202  | 14.20563722 | 0.000427097 |
| chr9  | G | 97396234  | 14.21051805 | 0.00042641  |
| chr10 | G | 2978389   | 14.21271302 | 0.000426101 |
| chr19 | G | 6753570   | 14.21564964 | 0.000425689 |
| chr8  | G | 123928378 | 14.22103309 | 0.000424933 |
| chr10 | C | 30350010  | 14.22358234 | 0.000424576 |
| chr5  | C | 140207819 | 14.22942229 | 0.000423759 |
| chr10 | C | 45105836  | 14.23322453 | 0.000423228 |
| chr16 | G | 29273319  | 14.23741633 | 0.000422644 |
| chr14 | C | 100126762 | 14.23861907 | 0.000422476 |
| chr18 | G | 19929195  | 14.24284809 | 0.000421888 |
| chr7  | G | 152023822 | 14.24587849 | 0.000421467 |
| chr7  | C | 101632605 | 14.24718748 | 0.000421285 |
| chr12 | G | 49963268  | 14.24899152 | 0.000421035 |
| chr1  | G | 1201366   | 14.25131163 | 0.000420713 |
| chr18 | G | 2906281   | 14.25210225 | 0.000420604 |
| chr8  | C | 55367118  | 14.25404785 | 0.000420334 |
| chr9  | G | 100720175 | 14.25788891 | 0.000419803 |
| chr19 | G | 45413749  | 14.26241886 | 0.000419177 |
| chr2  | G | 167691504 | 14.26370363 | 0.000419    |
| chr11 | G | 129910706 | 14.26959109 | 0.000418189 |
| chr16 | C | 89070458  | 14.2717562  | 0.000417891 |
| chr14 | C | 105337812 | 14.27673262 | 0.000417207 |
| chr12 | G | 110128206 | 14.28442004 | 0.000416153 |
| chr9  | C | 23720115  | 14.28704003 | 0.000415795 |
| chr1  | G | 120906301 | 14.29513075 | 0.000414691 |
| chr16 | G | 88104917  | 14.30043627 | 0.000413968 |
| chr1  | C | 23865871  | 14.30343582 | 0.00041356  |
| chr13 | G | 27470230  | 14.30537364 | 0.000413297 |
| chr15 | G | 68663435  | 14.30610935 | 0.000413197 |

|       |   |           |             |             |
|-------|---|-----------|-------------|-------------|
| chr19 | C | 3555892   | 14.31187542 | 0.000412415 |
| chr1  | G | 23713504  | 14.316567   | 0.00041178  |
| chr1  | C | 73084228  | 14.31992212 | 0.000411327 |
| chr9  | G | 22626770  | 14.32406265 | 0.000410768 |
| chr7  | C | 6109026   | 14.32469278 | 0.000410683 |
| chr4  | C | 6595061   | 14.32553442 | 0.00041057  |
| chr1  | G | 23000335  | 14.33180982 | 0.000409725 |
| chr9  | G | 80262614  | 14.33343809 | 0.000409506 |
| chr9  | G | 132309983 | 14.33451437 | 0.000409361 |
| chr1  | G | 244895774 | 14.33551822 | 0.000409227 |
| chr15 | C | 76460966  | 14.33653531 | 0.00040909  |
| chr10 | C | 9976478   | 14.3370553  | 0.00040902  |
| chr17 | G | 2829520   | 14.33997079 | 0.000408629 |
| chr17 | G | 79479132  | 14.35944529 | 0.000406028 |
| chr7  | C | 100773857 | 14.36316855 | 0.000405533 |
| chr7  | C | 2388351   | 14.3652202  | 0.000405261 |
| chr11 | G | 792266    | 14.36536407 | 0.000405242 |
| chr9  | G | 110580477 | 14.37267972 | 0.000404272 |
| chr8  | C | 11538065  | 14.37362623 | 0.000404146 |
| chr11 | C | 134751718 | 14.37529692 | 0.000403925 |
| chr22 | C | 27084133  | 14.38248276 | 0.000402976 |
| chr18 | G | 147108    | 14.38817296 | 0.000402226 |
| chr17 | C | 73739644  | 14.38877458 | 0.000402147 |
| chr19 | C | 49377907  | 14.39039714 | 0.000401934 |
| chr6  | C | 41336980  | 14.40115072 | 0.000400522 |
| chr11 | C | 1013302   | 14.40292334 | 0.00040029  |
| chr19 | G | 32573209  | 14.4044378  | 0.000400092 |
| chr18 | C | 65358817  | 14.40662733 | 0.000399805 |
| chr8  | G | 76316957  | 14.41176471 | 0.000399134 |
| chr22 | C | 39635667  | 14.41547312 | 0.000398651 |
| chr9  | G | 131391004 | 14.41592142 | 0.000398592 |
| chr14 | C | 91790557  | 14.4170442  | 0.000398446 |
| chr3  | C | 49158449  | 14.42134316 | 0.000397887 |
| chr18 | C | 74138860  | 14.4224041  | 0.000397749 |
| chr11 | C | 128169004 | 14.42805122 | 0.000397016 |
| chrX  | G | 99656574  | 14.42913915 | 0.000396875 |
| chr16 | C | 31885097  | 14.43824944 | 0.000395695 |
| chr2  | G | 242628374 | 14.43999581 | 0.00039547  |
| chr11 | G | 69054695  | 14.44815058 | 0.000394419 |
| chr4  | C | 31998273  | 14.45070763 | 0.00039409  |
| chr10 | C | 16504929  | 14.4547988  | 0.000393564 |
| chr19 | C | 19371690  | 14.45815696 | 0.000393133 |
| chr11 | C | 110016954 | 14.45964223 | 0.000392942 |

|       |   |           |             |             |
|-------|---|-----------|-------------|-------------|
| chr1  | C | 200904318 | 14.46092571 | 0.000392778 |
| chr17 | G | 46802932  | 14.48215988 | 0.000390068 |
| chr6  | C | 43425044  | 14.48299776 | 0.000389962 |
| chr11 | G | 2942129   | 14.49417045 | 0.000388545 |
| chr8  | C | 95654569  | 14.51292923 | 0.00038618  |
| chr20 | G | 35724443  | 14.51703191 | 0.000385665 |
| chrX  | C | 48219703  | 14.52203678 | 0.000385037 |
| chr2  | G | 74629788  | 14.52821521 | 0.000384264 |
| chr2  | G | 3681019   | 14.52984578 | 0.000384061 |
| chr17 | G | 46802937  | 14.53016018 | 0.000384021 |
| chr12 | C | 49446733  | 14.53083419 | 0.000383937 |
| chr20 | G | 56368525  | 14.54383583 | 0.000382318 |
| chr17 | G | 36625160  | 14.55012618 | 0.000381538 |
| chr20 | C | 43992220  | 14.56169238 | 0.000380107 |
| chr20 | C | 17411845  | 14.56643899 | 0.000379522 |
| chr13 | C | 112628044 | 14.57141228 | 0.00037891  |
| chr8  | C | 144366522 | 14.57407346 | 0.000378583 |
| chr16 | C | 66891580  | 14.57522495 | 0.000378442 |
| chr22 | C | 38942203  | 14.57788079 | 0.000378116 |
| chr4  | C | 84252094  | 14.58341984 | 0.000377437 |
| chr1  | C | 24272153  | 14.58371492 | 0.000377401 |
| chr1  | C | 917547    | 14.59463554 | 0.000376067 |
| chr10 | C | 135179887 | 14.59549752 | 0.000375962 |
| chr2  | C | 38499635  | 14.60215908 | 0.000375151 |
| chr16 | C | 1496993   | 14.60605407 | 0.000374678 |
| chr22 | C | 46984371  | 14.60714611 | 0.000374545 |
| chr17 | G | 40125904  | 14.60762944 | 0.000374487 |
| chr6  | C | 150464050 | 14.61790731 | 0.000373242 |
| chr3  | G | 192232380 | 14.61831736 | 0.000373193 |
| chr19 | C | 42482257  | 14.61835902 | 0.000373188 |
| chr5  | G | 202974    | 14.61881207 | 0.000373133 |
| chr18 | G | 53257096  | 14.62544388 | 0.000372333 |
| chr2  | G | 236276312 | 14.62652751 | 0.000372202 |
| chr4  | G | 183161803 | 14.62712877 | 0.00037213  |
| chr2  | C | 8727142   | 14.62843482 | 0.000371972 |
| chr19 | G | 10394664  | 14.63142648 | 0.000371612 |
| chr4  | G | 187396187 | 14.63343732 | 0.000371371 |
| chr11 | C | 518982    | 14.63778712 | 0.000370848 |
| chr1  | G | 1159233   | 14.64025407 | 0.000370553 |
| chr7  | G | 67269026  | 14.64769669 | 0.000369662 |
| chr1  | G | 77486519  | 14.64981528 | 0.000369409 |
| chr22 | G | 46449331  | 14.65434343 | 0.000368868 |
| chr15 | C | 93163407  | 14.65570393 | 0.000368706 |

|       |   |           |             |             |
|-------|---|-----------|-------------|-------------|
| chr2  | G | 2716015   | 14.66203733 | 0.000367952 |
| chr10 | G | 94603504  | 14.66740668 | 0.000367314 |
| chr16 | G | 24615220  | 14.66750726 | 0.000367302 |
| chr16 | C | 1256167   | 14.66914291 | 0.000367108 |
| chr4  | C | 56469894  | 14.67239495 | 0.000366723 |
| chr3  | G | 172032995 | 14.67498398 | 0.000366416 |
| chr16 | G | 2796601   | 14.67839957 | 0.000366012 |
| chr2  | C | 139456293 | 14.67860416 | 0.000365988 |
| chr10 | G | 126296314 | 14.68087543 | 0.00036572  |
| chr13 | C | 21243750  | 14.69222296 | 0.000364383 |
| chr16 | G | 23755459  | 14.69523126 | 0.000364029 |
| chr5  | G | 777940    | 14.69561389 | 0.000363984 |
| chr11 | G | 73425563  | 14.70195558 | 0.00036324  |
| chr4  | G | 2826931   | 14.71050121 | 0.000362241 |
| chr17 | C | 18882717  | 14.7284536  | 0.000360151 |
| chr15 | C | 45716493  | 14.73148323 | 0.0003598   |
| chr14 | C | 104344772 | 14.73385826 | 0.000359524 |
| chr17 | G | 16887990  | 14.73401106 | 0.000359507 |
| chr7  | G | 139763025 | 14.73417247 | 0.000359488 |
| chr15 | C | 28494884  | 14.75152089 | 0.000357486 |
| chr19 | C | 5677466   | 14.75460576 | 0.000357131 |
| chr3  | G | 113160623 | 14.75462553 | 0.000357129 |
| chr22 | G | 43098436  | 14.75757653 | 0.00035679  |
| chr12 | G | 131530240 | 14.75781043 | 0.000356763 |
| chr3  | C | 50567990  | 14.76558783 | 0.000355872 |
| chr7  | C | 129202982 | 14.77637112 | 0.00035464  |
| chr6  | G | 98864680  | 14.7805678  | 0.000354162 |
| chr12 | G | 112605719 | 14.78456193 | 0.000353708 |
| chr1  | C | 22163875  | 14.78470757 | 0.000353691 |
| chr6  | C | 81925142  | 14.78573163 | 0.000353575 |
| chr6  | G | 139825556 | 14.78848989 | 0.000353262 |
| chr22 | G | 41932171  | 14.79354298 | 0.000352689 |
| chr11 | C | 540708    | 14.79513593 | 0.000352508 |
| chr1  | G | 245382672 | 14.79891996 | 0.00035208  |
| chr7  | C | 5691182   | 14.79988576 | 0.000351971 |
| chr6  | C | 98864725  | 14.8014179  | 0.000351798 |
| chr9  | G | 79293601  | 14.80621306 | 0.000351257 |
| chr18 | G | 74818415  | 14.81664704 | 0.000350082 |
| chr1  | G | 109584137 | 14.82224387 | 0.000349454 |
| chr10 | C | 123441569 | 14.83180559 | 0.000348384 |
| chr22 | C | 28193547  | 14.83260056 | 0.000348296 |
| chr7  | C | 5203446   | 14.83469437 | 0.000348062 |
| chr5  | C | 125898148 | 14.83559832 | 0.000347961 |

|       |   |           |             |             |
|-------|---|-----------|-------------|-------------|
| chr1  | G | 9791314   | 14.83567038 | 0.000347953 |
| chr19 | C | 49518329  | 14.83665744 | 0.000347843 |
| chr17 | G | 20988372  | 14.8407202  | 0.00034739  |
| chr8  | C | 65491969  | 14.84502386 | 0.000346911 |
| chr1  | C | 228296910 | 14.84531314 | 0.000346879 |
| chrX  | G | 114959280 | 14.84584369 | 0.00034682  |
| chr16 | G | 6385607   | 14.84933443 | 0.000346433 |
| chr21 | G | 45753891  | 14.84996984 | 0.000346362 |
| chr2  | C | 64607620  | 14.85967643 | 0.000345287 |
| chr17 | C | 74038357  | 14.86685266 | 0.000344495 |
| chr13 | C | 93748063  | 14.87013213 | 0.000344133 |
| chr1  | G | 27332754  | 14.87507883 | 0.000343589 |
| chr12 | C | 123986045 | 14.8781769  | 0.000343248 |
| chr17 | G | 19918998  | 14.90062108 | 0.000340793 |
| chr22 | C | 49787077  | 14.90433746 | 0.000340389 |
| chr2  | C | 170707119 | 14.90707984 | 0.000340091 |
| chr1  | C | 179788090 | 14.91151501 | 0.000339609 |
| chr5  | G | 111722954 | 14.91297935 | 0.00033945  |
| chr15 | C | 66127282  | 14.91963418 | 0.00033873  |
| chr1  | G | 184641310 | 14.92986542 | 0.000337625 |
| chr19 | G | 52548903  | 14.93146004 | 0.000337453 |
| chr11 | G | 68115318  | 14.93350785 | 0.000337233 |
| chr2  | G | 73440759  | 14.93915627 | 0.000336625 |
| chr16 | G | 4027611   | 14.93968842 | 0.000336568 |
| chr18 | C | 45765288  | 14.94560593 | 0.000335933 |
| chr9  | G | 135073769 | 14.9467804  | 0.000335808 |
| chr7  | C | 40293253  | 14.94954304 | 0.000335512 |
| chr22 | C | 30614403  | 14.95409618 | 0.000335025 |
| chr18 | G | 61772469  | 14.97220196 | 0.000333097 |
| chr16 | G | 2279300   | 14.97320529 | 0.000332991 |
| chr7  | G | 139016590 | 14.97954364 | 0.000332319 |
| chr17 | C | 66195778  | 14.98361223 | 0.000331889 |
| chr9  | G | 99251208  | 14.98418654 | 0.000331828 |
| chr8  | G | 102262494 | 14.98667026 | 0.000331566 |
| chr1  | G | 179388433 | 14.98768374 | 0.000331459 |
| chr2  | G | 129285394 | 14.99198199 | 0.000331006 |
| chr7  | G | 155251034 | 14.99442901 | 0.000330748 |
| chr2  | G | 8754939   | 14.99903669 | 0.000330264 |
| chr19 | G | 6688202   | 15.0020528  | 0.000329947 |
| chr9  | C | 130438695 | 15.00275509 | 0.000329873 |
| chr7  | C | 111750019 | 15.00887139 | 0.000329232 |
| chr1  | C | 150947740 | 15.01470311 | 0.000328622 |
| chr3  | G | 49694787  | 15.01579768 | 0.000328508 |

|       |   |           |             |             |
|-------|---|-----------|-------------|-------------|
| chr17 | G | 7308682   | 15.01744017 | 0.000328336 |
| chr9  | C | 89016435  | 15.02037235 | 0.00032803  |
| chr19 | G | 56091810  | 15.02092432 | 0.000327973 |
| chr3  | G | 37068108  | 15.02203473 | 0.000327857 |
| chr19 | G | 51022576  | 15.02328917 | 0.000327726 |
| chr8  | G | 24881662  | 15.02989225 | 0.000327039 |
| chr21 | C | 46892963  | 15.04735485 | 0.00032523  |
| chr2  | G | 10767628  | 15.05310696 | 0.000324637 |
| chr7  | G | 4919402   | 15.05688363 | 0.000324248 |
| chr6  | G | 30712058  | 15.05979315 | 0.000323949 |
| chr17 | G | 77789466  | 15.07541354 | 0.000322348 |
| chr19 | C | 36870436  | 15.07871914 | 0.00032201  |
| chr3  | G | 49433916  | 15.08533178 | 0.000321336 |
| chr7  | G | 129794578 | 15.09307191 | 0.000320548 |
| chr7  | G | 84816088  | 15.09460104 | 0.000320393 |
| chr8  | C | 139559203 | 15.11561949 | 0.000318268 |
| chr7  | C | 45157839  | 15.12346924 | 0.000317478 |
| chr21 | G | 43896916  | 15.12844673 | 0.000316978 |
| chr10 | G | 5657855   | 15.1286975  | 0.000316953 |
| chr19 | G | 47570596  | 15.13105695 | 0.000316717 |
| chr14 | C | 105440240 | 15.13617928 | 0.000316204 |
| chr9  | C | 109345    | 15.14655517 | 0.000315169 |
| chr11 | G | 34101721  | 15.1605921  | 0.000313774 |
| chr18 | G | 61477562  | 15.16334411 | 0.000313501 |
| chr15 | C | 83331645  | 15.16444848 | 0.000313392 |
| chr7  | C | 22909423  | 15.17208677 | 0.000312637 |
| chr17 | G | 79968737  | 15.17596909 | 0.000312254 |
| chr11 | G | 44642834  | 15.17930957 | 0.000311925 |
| chr1  | G | 52647483  | 15.18036316 | 0.000311821 |
| chr17 | C | 8103936   | 15.18291252 | 0.00031157  |
| chr2  | C | 70894842  | 15.18918856 | 0.000310954 |
| chr12 | G | 64238503  | 15.19137601 | 0.00031074  |
| chr12 | G | 114200473 | 15.19211419 | 0.000310667 |
| chr16 | C | 66746109  | 15.19505838 | 0.000310379 |
| chr14 | C | 22179209  | 15.19820887 | 0.000310071 |
| chr17 | G | 57814125  | 15.20635332 | 0.000309276 |
| chr5  | C | 72112799  | 15.20809471 | 0.000309106 |
| chr9  | G | 123117339 | 15.21232224 | 0.000308694 |
| chr12 | C | 41305237  | 15.21278677 | 0.000308649 |
| chr17 | G | 77230099  | 15.21878112 | 0.000308067 |
| chr12 | G | 99207719  | 15.2229861  | 0.000307659 |
| chr1  | G | 47752207  | 15.22505758 | 0.000307458 |
| chr10 | C | 74901925  | 15.24713413 | 0.000305329 |

|       |   |           |             |             |
|-------|---|-----------|-------------|-------------|
| chr5  | G | 146766753 | 15.24835532 | 0.000305212 |
| chr8  | G | 77767075  | 15.26901281 | 0.000303235 |
| chr9  | C | 113031339 | 15.26949191 | 0.000303189 |
| chr3  | G | 3170139   | 15.27775817 | 0.000302403 |
| chr9  | G | 33862102  | 15.28047877 | 0.000302144 |
| chr8  | G | 145182109 | 15.28103609 | 0.000302092 |
| chr9  | G | 98783523  | 15.29210808 | 0.000301043 |
| chr9  | C | 131508314 | 15.29580049 | 0.000300694 |
| chr3  | C | 196763340 | 15.30281821 | 0.000300032 |
| chr13 | C | 50219447  | 15.30907476 | 0.000299444 |
| chr12 | C | 110222138 | 15.30915025 | 0.000299437 |
| chr17 | C | 79423286  | 15.31082143 | 0.00029928  |
| chr19 | C | 37807517  | 15.3135771  | 0.000299021 |
| chr10 | G | 44815308  | 15.33117118 | 0.000297376 |
| chr14 | C | 104158552 | 15.3360694  | 0.00029692  |
| chr7  | G | 75051222  | 15.35468106 | 0.000295194 |
| chr2  | G | 33982058  | 15.35598613 | 0.000295073 |
| chr11 | G | 64855762  | 15.37196437 | 0.000293601 |
| chr7  | G | 100299788 | 15.37377619 | 0.000293435 |
| chr8  | C | 74659476  | 15.37650412 | 0.000293184 |
| chr3  | C | 33195811  | 15.38125172 | 0.000292749 |
| chr1  | G | 37990217  | 15.40307495 | 0.000290759 |
| chr17 | G | 80552043  | 15.41918477 | 0.000289299 |
| chr5  | C | 1618709   | 15.4346778  | 0.000287904 |
| chr17 | G | 9676033   | 15.44037728 | 0.000287392 |
| chr14 | G | 26934623  | 15.44204491 | 0.000287243 |
| chr17 | G | 19266381  | 15.46375093 | 0.000285306 |
| chr4  | G | 3049688   | 15.46469382 | 0.000285222 |
| chr8  | C | 142593701 | 15.4710221  | 0.00028466  |
| chr10 | C | 72057614  | 15.47756602 | 0.00028408  |
| chr10 | G | 122659209 | 15.47879244 | 0.000283972 |
| chr16 | C | 66512243  | 15.48079711 | 0.000283795 |
| chr1  | G | 245317291 | 15.49647287 | 0.000282413 |
| chr7  | C | 149411282 | 15.50213473 | 0.000281916 |
| chr19 | C | 52479145  | 15.502601   | 0.000281875 |
| chr18 | C | 73391317  | 15.50523106 | 0.000281645 |
| chr16 | G | 74377981  | 15.50530576 | 0.000281638 |
| chr18 | C | 21977868  | 15.5100741  | 0.000281221 |
| chr10 | G | 100150937 | 15.51414775 | 0.000280865 |
| chr10 | C | 127658733 | 15.51416516 | 0.000280864 |
| chr6  | C | 113543265 | 15.51644404 | 0.000280665 |
| chr6  | G | 125965889 | 15.52330233 | 0.000280067 |
| chr3  | C | 194930575 | 15.52603047 | 0.00027983  |



|       |   |           |             |             |
|-------|---|-----------|-------------|-------------|
| chr22 | C | 50125234  | 15.53085402 | 0.00027941  |
| chr2  | C | 85107460  | 15.5325615  | 0.000279262 |
| chr7  | G | 140773138 | 15.54414525 | 0.000278259 |
| chr4  | G | 152967331 | 15.54914623 | 0.000277828 |
| chr10 | G | 75549696  | 15.55476724 | 0.000277343 |
| chr16 | C | 1661275   | 15.59154745 | 0.000274198 |
| chr5  | C | 170969908 | 15.60720558 | 0.000272871 |
| chr11 | G | 60775212  | 15.61064578 | 0.000272581 |
| chr6  | G | 170574994 | 15.61541781 | 0.000272179 |
| chr12 | G | 114255398 | 15.61827953 | 0.000271938 |
| chr20 | C | 61996913  | 15.6257665  | 0.000271308 |
| chr17 | G | 9129315   | 15.62915027 | 0.000271025 |
| chr22 | G | 50994473  | 15.63129387 | 0.000270845 |
| chr8  | G | 12417252  | 15.6335076  | 0.000270659 |
| chr20 | C | 55500525  | 15.63670975 | 0.000270392 |
| chr17 | C | 77042829  | 15.63880368 | 0.000270217 |
| chr11 | G | 67095772  | 15.64418346 | 0.000269767 |
| chr10 | G | 102106958 | 15.6470837  | 0.000269526 |
| chr5  | C | 176543913 | 15.6472796  | 0.000269509 |
| chr19 | G | 6213321   | 15.65426166 | 0.000268929 |
| chr19 | C | 49000661  | 15.6563973  | 0.000268751 |
| chr4  | G | 1569468   | 15.65876237 | 0.000268555 |
| chrX  | G | 48834387  | 15.66554371 | 0.000267993 |
| chr7  | C | 45038994  | 15.68972332 | 0.000266    |
| chr10 | C | 1643950   | 15.69563423 | 0.000265516 |
| chr7  | G | 44911690  | 15.70000901 | 0.000265158 |
| chr17 | C | 4589377   | 15.70161047 | 0.000265027 |
| chr17 | G | 38335987  | 15.70674502 | 0.000264607 |
| chr1  | C | 230206375 | 15.70879464 | 0.00026444  |
| chr5  | C | 175874848 | 15.72699187 | 0.000262962 |
| chr5  | G | 2669031   | 15.73120676 | 0.000262621 |
| chr20 | C | 55556235  | 15.75223293 | 0.000260926 |
| chr20 | G | 60452249  | 15.75432172 | 0.000260759 |
| chr11 | C | 95215632  | 15.75775939 | 0.000260483 |
| chr11 | C | 47611494  | 15.76192312 | 0.00026015  |
| chr20 | G | 62748066  | 15.76287801 | 0.000260073 |
| chr6  | G | 74009153  | 15.77521566 | 0.000259089 |
| chr2  | G | 101643840 | 15.78292044 | 0.000258476 |
| chr22 | G | 47194658  | 15.78799147 | 0.000258074 |
| chr5  | C | 85522254  | 15.80305374 | 0.000256883 |
| chr19 | C | 46391687  | 15.8040867  | 0.000256801 |
| chr2  | G | 176949630 | 15.80520674 | 0.000256713 |
| chr22 | C | 41625671  | 15.8128243  | 0.000256114 |

|       |   |           |             |             |
|-------|---|-----------|-------------|-------------|
| chr14 | C | 88789493  | 15.82053002 | 0.000255509 |
| chr10 | G | 1353585   | 15.8242399  | 0.000255218 |
| chr2  | G | 9563255   | 15.82978171 | 0.000254785 |
| chr17 | C | 40913065  | 15.82997451 | 0.00025477  |
| chr8  | G | 144489881 | 15.83192714 | 0.000254618 |
| chr8  | C | 108509622 | 15.83203105 | 0.000254609 |
| chr4  | G | 8775084   | 15.85341591 | 0.000252946 |
| chr7  | G | 56606553  | 15.85593704 | 0.000252751 |
| chr1  | G | 1506408   | 15.85914866 | 0.000252503 |
| chr14 | C | 103141132 | 15.86807148 | 0.000251814 |
| chr22 | C | 40539661  | 15.87203281 | 0.000251509 |
| chr20 | G | 57185555  | 15.87839374 | 0.00025102  |
| chr18 | C | 11972618  | 15.87908411 | 0.000250967 |
| chr10 | G | 1206496   | 15.87913182 | 0.000250963 |
| chr7  | C | 4784457   | 15.88448984 | 0.000250552 |
| chr8  | G | 1105087   | 15.89078857 | 0.00025007  |
| chr4  | C | 154377966 | 15.89697224 | 0.000249597 |
| chr4  | C | 874449    | 15.90066003 | 0.000249316 |
| chr5  | C | 133365758 | 15.93212329 | 0.000246931 |
| chr1  | C | 20849385  | 15.94336613 | 0.000246086 |
| chr22 | G | 45671460  | 15.94482053 | 0.000245977 |
| chr17 | G | 21280853  | 15.94830011 | 0.000245716 |
| chr17 | C | 1116979   | 15.95098194 | 0.000245515 |
| chr7  | C | 1518672   | 15.95472251 | 0.000245235 |
| chr8  | G | 57508675  | 15.95715762 | 0.000245053 |
| chr19 | G | 58951343  | 15.96150386 | 0.000244728 |
| chr14 | G | 69791964  | 15.96541774 | 0.000244436 |
| chr17 | C | 74581128  | 15.97877545 | 0.000243443 |
| chr14 | C | 71655194  | 15.9788937  | 0.000243435 |
| chr7  | C | 99679976  | 15.9809968  | 0.000243279 |
| chr10 | G | 102531857 | 15.99091695 | 0.000242545 |
| chr16 | C | 63651496  | 15.995446   | 0.000242211 |
| chr19 | G | 8674889   | 15.9965447  | 0.00024213  |
| chr5  | C | 32617998  | 15.99859153 | 0.000241979 |
| chr12 | C | 32064328  | 16.01719961 | 0.000240613 |
| chr12 | G | 1973367   | 16.0275766  | 0.000239855 |
| chr12 | G | 103358802 | 16.03410942 | 0.000239379 |
| chr5  | C | 159143813 | 16.03654781 | 0.000239202 |
| chr4  | C | 31998338  | 16.04476602 | 0.000238605 |
| chr8  | C | 22548030  | 16.05454138 | 0.000237898 |
| chr17 | G | 27172275  | 16.05669349 | 0.000237743 |
| chr18 | G | 14177892  | 16.06709789 | 0.000236993 |
| chr3  | G | 118753880 | 16.10600952 | 0.000234213 |

|       |   |           |             |             |
|-------|---|-----------|-------------|-------------|
| chr1  | G | 29049741  | 16.10723471 | 0.000234126 |
| chr2  | G | 3690208   | 16.11432807 | 0.000233624 |
| chr9  | G | 42368597  | 16.11686729 | 0.000233444 |
| chr6  | C | 148673924 | 16.12280628 | 0.000233025 |
| chr21 | C | 45161749  | 16.12579459 | 0.000232814 |
| chr1  | C | 31250651  | 16.13211837 | 0.000232369 |
| chr7  | C | 73535230  | 16.14566181 | 0.000231419 |
| chr18 | C | 8784534   | 16.15159981 | 0.000231004 |
| chr13 | G | 69497320  | 16.15414459 | 0.000230826 |
| chr5  | C | 72599483  | 16.16762668 | 0.000229888 |
| chr6  | C | 106650598 | 16.16814695 | 0.000229851 |
| chr1  | G | 40071251  | 16.17770776 | 0.000229189 |
| chr6  | C | 30311712  | 16.18004958 | 0.000229027 |
| chr14 | C | 25518896  | 16.18356597 | 0.000228783 |
| chr16 | C | 68299937  | 16.19764344 | 0.000227813 |
| chr22 | C | 16904407  | 16.20213485 | 0.000227505 |
| chr7  | C | 46433263  | 16.20844421 | 0.000227072 |
| chr2  | G | 172971613 | 16.20917562 | 0.000227022 |
| chr7  | C | 5461078   | 16.21090254 | 0.000226904 |
| chr14 | C | 101543603 | 16.21885748 | 0.00022636  |
| chr11 | G | 134734561 | 16.23416066 | 0.000225319 |
| chr1  | C | 212782448 | 16.23617822 | 0.000225182 |
| chr11 | C | 71159899  | 16.23765497 | 0.000225082 |
| chr2  | G | 364326    | 16.25978918 | 0.000223587 |
| chr9  | G | 124976015 | 16.26405655 | 0.0002233   |
| chr5  | C | 54562     | 16.26932178 | 0.000222946 |
| chr5  | C | 180238066 | 16.27349989 | 0.000222666 |
| chr17 | C | 30724093  | 16.27811062 | 0.000222358 |
| chr17 | G | 76489219  | 16.28212095 | 0.00022209  |
| chr19 | G | 13843517  | 16.29072271 | 0.000221516 |
| chr12 | G | 56570627  | 16.30901802 | 0.000220302 |
| chr2  | G | 217234932 | 16.31067673 | 0.000220192 |
| chr1  | G | 232815004 | 16.31860834 | 0.000219669 |
| chr11 | G | 119294055 | 16.33226498 | 0.00021877  |
| chr16 | G | 55425388  | 16.33884232 | 0.000218339 |
| chr4  | C | 185316335 | 16.33967121 | 0.000218285 |
| chr11 | G | 62341901  | 16.34169285 | 0.000218152 |
| chr21 | G | 36249943  | 16.34880925 | 0.000217687 |
| chr14 | C | 91739510  | 16.35640535 | 0.000217192 |
| chr1  | C | 35980640  | 16.36217012 | 0.000216817 |
| chr2  | C | 86935708  | 16.36228012 | 0.00021681  |
| chr1  | G | 213082168 | 16.36822978 | 0.000216424 |
| chrX  | C | 5236551   | 16.37243677 | 0.000216152 |

|       |   |           |             |             |
|-------|---|-----------|-------------|-------------|
| chr19 | G | 11662912  | 16.37253411 | 0.000216145 |
| chr16 | C | 47991866  | 16.38879663 | 0.000215095 |
| chr6  | C | 150359543 | 16.40879768 | 0.000213812 |
| chr16 | C | 20418000  | 16.41001967 | 0.000213734 |
| chr6  | C | 169338081 | 16.43468989 | 0.000212164 |
| chr7  | G | 87105194  | 16.44074054 | 0.000211781 |
| chr22 | G | 50451245  | 16.46242176 | 0.000210415 |
| chr2  | G | 121570210 | 16.46281054 | 0.00021039  |
| chr11 | C | 121288873 | 16.48428611 | 0.000209047 |
| chr8  | G | 133204401 | 16.48604341 | 0.000208938 |
| chr2  | C | 131484570 | 16.50099245 | 0.000208009 |
| chr6  | G | 39397875  | 16.50209709 | 0.000207941 |
| chr9  | C | 140080318 | 16.51099499 | 0.000207391 |
| chr19 | C | 50110541  | 16.54219508 | 0.000205474 |
| chr16 | C | 27124422  | 16.54787578 | 0.000205128 |
| chr9  | C | 139150462 | 16.5620435  | 0.000204266 |
| chr17 | C | 79235738  | 16.56473103 | 0.000204103 |
| chr17 | C | 5263594   | 16.57827735 | 0.000203283 |
| chr16 | C | 71623010  | 16.58706851 | 0.000202754 |
| chr22 | G | 44033554  | 16.58859448 | 0.000202662 |
| chr4  | C | 16011191  | 16.58923278 | 0.000202623 |
| chr16 | G | 87988249  | 16.59501094 | 0.000202276 |
| chr7  | G | 100207619 | 16.60100857 | 0.000201917 |
| chr20 | C | 55982760  | 16.60362779 | 0.00020176  |
| chr1  | C | 249167921 | 16.60605529 | 0.000201615 |
| chr12 | G | 86909772  | 16.61916822 | 0.000200833 |
| chr2  | G | 224282222 | 16.62167128 | 0.000200684 |
| chr19 | C | 56666702  | 16.62202856 | 0.000200662 |
| chr14 | C | 102861857 | 16.62932187 | 0.000200229 |
| chr16 | G | 895442    | 16.63876592 | 0.00019967  |
| chr8  | G | 92562838  | 16.64051678 | 0.000199566 |
| chr22 | G | 37663054  | 16.64518873 | 0.000199291 |
| chr8  | G | 48030658  | 16.65771818 | 0.000198553 |
| chr5  | C | 1279429   | 16.65810584 | 0.00019853  |
| chr3  | G | 182896036 | 16.68135829 | 0.00019717  |
| chr7  | G | 75812359  | 16.68317248 | 0.000197064 |
| chr7  | G | 1511235   | 16.69213289 | 0.000196543 |
| chr5  | G | 140710444 | 16.70505417 | 0.000195794 |
| chr12 | G | 65220259  | 16.7083568  | 0.000195603 |
| chr20 | G | 34359674  | 16.71599686 | 0.000195163 |
| chr1  | G | 16858231  | 16.71676881 | 0.000195118 |
| chr8  | G | 144716160 | 16.71813196 | 0.00019504  |
| chr3  | G | 179526636 | 16.73173089 | 0.000194259 |

|       |   |           |             |             |
|-------|---|-----------|-------------|-------------|
| chr11 | C | 62454439  | 16.73194622 | 0.000194246 |
| chr19 | C | 5862201   | 16.74031322 | 0.000193768 |
| chr16 | C | 31374542  | 16.741266   | 0.000193713 |
| chr2  | C | 190920042 | 16.74998429 | 0.000193216 |
| chr8  | G | 143682782 | 16.78238151 | 0.000191381 |
| chr15 | C | 77925403  | 16.78378037 | 0.000191302 |
| chr9  | G | 100614417 | 16.79414261 | 0.00019072  |
| chr19 | G | 42791673  | 16.80059208 | 0.000190358 |
| chr16 | G | 89099450  | 16.80398198 | 0.000190169 |
| chr1  | G | 2771396   | 16.82289984 | 0.000189114 |
| chr17 | G | 25309197  | 16.83235199 | 0.00018859  |
| chr19 | G | 11005890  | 16.86444531 | 0.000186822 |
| chr12 | C | 121088884 | 16.86517307 | 0.000186782 |
| chr1  | C | 242687388 | 16.86903339 | 0.00018657  |
| chr20 | G | 32225692  | 16.86961123 | 0.000186539 |
| chr17 | G | 4675951   | 16.87395444 | 0.000186301 |
| chr12 | G | 131837058 | 16.87567393 | 0.000186207 |
| chr8  | G | 144342738 | 16.88231196 | 0.000185845 |
| chr10 | C | 72489666  | 16.88608699 | 0.00018564  |
| chr19 | C | 1173480   | 16.89150491 | 0.000185345 |
| chr5  | G | 143424430 | 16.89290056 | 0.00018527  |
| chr9  | G | 28713157  | 16.89580535 | 0.000185112 |
| chr13 | C | 95241802  | 16.89698781 | 0.000185048 |
| chr19 | C | 46145423  | 16.90217251 | 0.000184767 |
| chr9  | C | 116102309 | 16.90485107 | 0.000184622 |
| chr11 | G | 63432155  | 16.92253364 | 0.000183669 |
| chr11 | G | 39915366  | 16.93455232 | 0.000183024 |
| chr9  | C | 131576656 | 16.94210271 | 0.000182621 |
| chr11 | G | 71189473  | 16.94243769 | 0.000182603 |
| chr14 | G | 106746262 | 16.94761878 | 0.000182327 |
| chr20 | C | 55745594  | 16.9651888  | 0.000181393 |
| chr8  | G | 42721700  | 16.97831875 | 0.000180699 |
| chr12 | C | 123466608 | 16.98224502 | 0.000180492 |
| chr1  | C | 2238931   | 16.99662781 | 0.000179736 |
| chr19 | G | 14019112  | 16.99820196 | 0.000179653 |
| chr15 | C | 62702223  | 17.01522505 | 0.000178764 |
| chr3  | C | 48908446  | 17.04037921 | 0.000177459 |
| chr8  | C | 86376885  | 17.04220539 | 0.000177364 |
| chr7  | G | 6488238   | 17.04969736 | 0.000176978 |
| chr3  | C | 2454124   | 17.05241578 | 0.000176838 |
| chr13 | C | 46270493  | 17.05758303 | 0.000176572 |
| chr16 | G | 85648186  | 17.063381   | 0.000176275 |
| chr15 | G | 101938822 | 17.07078569 | 0.000175895 |

|       |   |           |             |             |
|-------|---|-----------|-------------|-------------|
| chr3  | G | 196052931 | 17.07250503 | 0.000175807 |
| chr12 | G | 49192030  | 17.10843369 | 0.000173982 |
| chr19 | C | 12807015  | 17.11079019 | 0.000173863 |
| chr3  | G | 11670016  | 17.11275783 | 0.000173763 |
| chr15 | C | 20788120  | 17.116095   | 0.000173595 |
| chr11 | G | 107143932 | 17.12312181 | 0.000173241 |
| chr11 | G | 114491206 | 17.12337312 | 0.000173229 |
| chr11 | G | 65746151  | 17.12649745 | 0.000173072 |
| chr12 | C | 56889467  | 17.13191694 | 0.0001728   |
| chr7  | C | 2663198   | 17.1372348  | 0.000172534 |
| chr19 | C | 2317894   | 17.13970458 | 0.00017241  |
| chr17 | C | 2659336   | 17.1419604  | 0.000172297 |
| chr22 | G | 40428856  | 17.14866992 | 0.000171963 |
| chr5  | G | 79865455  | 17.16879199 | 0.000170963 |
| chr14 | C | 103270087 | 17.16933971 | 0.000170936 |
| chr6  | C | 74105101  | 17.18486331 | 0.000170169 |
| chr14 | G | 102394974 | 17.1860861  | 0.000170109 |
| chr20 | C | 62418966  | 17.18647466 | 0.00017009  |
| chr20 | C | 60283593  | 17.18785564 | 0.000170022 |
| chr9  | C | 137925249 | 17.2104324  | 0.000168915 |
| chr12 | G | 48190498  | 17.22570521 | 0.000168171 |
| chr12 | G | 54699550  | 17.23401681 | 0.000167768 |
| chr10 | G | 31892769  | 17.23466545 | 0.000167736 |
| chr4  | G | 110616233 | 17.24422294 | 0.000167274 |
| chr3  | G | 43935939  | 17.25179722 | 0.000166909 |
| chr19 | C | 41150655  | 17.25924223 | 0.000166655 |
| chr3  | G | 49296408  | 17.26045464 | 0.000166492 |
| chr17 | C | 46796559  | 17.27139444 | 0.000165968 |
| chr8  | C | 10871397  | 17.27454909 | 0.000165817 |
| chr4  | C | 1002864   | 17.28057099 | 0.000165529 |
| chr21 | G | 46974935  | 17.30117758 | 0.000164549 |
| chr11 | G | 109401178 | 17.30325825 | 0.00016445  |
| chr13 | C | 53774423  | 17.3120838  | 0.000164033 |
| chr11 | G | 4355884   | 17.31347718 | 0.000163967 |
| chr1  | G | 92949337  | 17.32540531 | 0.000163405 |
| chr19 | G | 50436004  | 17.33058136 | 0.000163162 |
| chr7  | C | 75691767  | 17.33158504 | 0.000163115 |
| chr20 | G | 32952824  | 17.36171637 | 0.000161708 |
| chr2  | C | 219128166 | 17.36327883 | 0.000161635 |
| chr8  | G | 140668261 | 17.37463754 | 0.000161109 |
| chr16 | G | 7360075   | 17.37895831 | 0.000160909 |
| chr14 | G | 77041512  | 17.38726582 | 0.000160526 |
| chr22 | G | 18593772  | 17.3894882  | 0.000160423 |

|       |   |           |             |             |
|-------|---|-----------|-------------|-------------|
| chr2  | G | 65327403  | 17.40486033 | 0.000159717 |
| chr9  | C | 139565264 | 17.41025188 | 0.000159471 |
| chr5  | C | 172385134 | 17.41126795 | 0.000159424 |
| chr9  | C | 2866489   | 17.43466992 | 0.000158358 |
| chr2  | C | 125398468 | 17.43606804 | 0.000158295 |
| chr5  | C | 8415957   | 17.45298321 | 0.00015753  |
| chr7  | G | 63644917  | 17.4663131  | 0.00015693  |
| chr7  | C | 150097146 | 17.46769782 | 0.000156868 |
| chr16 | G | 88977026  | 17.47352688 | 0.000156607 |
| chr9  | C | 130374496 | 17.48878168 | 0.000155925 |
| chr2  | C | 47144150  | 17.53976944 | 0.000153671 |
| chr16 | C | 85675560  | 17.55154931 | 0.000153156 |
| chr17 | C | 48437422  | 17.55585693 | 0.000152968 |
| chr16 | G | 30366739  | 17.5649206  | 0.000152573 |
| chr10 | C | 112696815 | 17.58284626 | 0.000151796 |
| chr1  | C | 144703906 | 17.59084137 | 0.000151451 |
| chr4  | C | 39962457  | 17.59408889 | 0.000151311 |
| chr19 | G | 57133691  | 17.59926005 | 0.000151089 |
| chr10 | C | 73360419  | 17.60087572 | 0.000151019 |
| chr12 | G | 62823100  | 17.60100849 | 0.000151014 |
| chr2  | C | 144679981 | 17.60839417 | 0.000150697 |
| chr7  | G | 65526909  | 17.61430346 | 0.000150443 |
| chr14 | C | 77966134  | 17.61808826 | 0.000150282 |
| chr2  | C | 121817273 | 17.63512457 | 0.000149556 |
| chr14 | G | 95239566  | 17.6414539  | 0.000149287 |
| chr12 | G | 120780907 | 17.64476213 | 0.000149147 |
| chr20 | G | 31061757  | 17.64897233 | 0.000148969 |
| chr6  | G | 19627164  | 17.6594752  | 0.000148525 |
| chr14 | G | 104744114 | 17.66461568 | 0.000148308 |
| chr2  | C | 128487319 | 17.6663248  | 0.000148237 |
| chr17 | C | 75652215  | 17.70712844 | 0.000146531 |
| chr1  | C | 32469944  | 17.71558855 | 0.000146181 |
| chr21 | G | 46276126  | 17.72383896 | 0.000145839 |
| chr16 | C | 85635597  | 17.72493083 | 0.000145794 |
| chr9  | C | 7148944   | 17.73975267 | 0.000145184 |
| chr1  | C | 155251041 | 17.76431879 | 0.000144179 |
| chr3  | G | 140785335 | 17.76495539 | 0.000144153 |
| chr12 | G | 24551035  | 17.84656668 | 0.000140871 |
| chr18 | C | 49367030  | 17.85517263 | 0.00014053  |
| chr1  | G | 208111434 | 17.85725573 | 0.000140448 |
| chr2  | G | 38619549  | 17.85791949 | 0.000140421 |
| chr1  | G | 20760048  | 17.88475263 | 0.000139365 |
| chr19 | C | 49379630  | 17.89541101 | 0.000138948 |

|       |   |           |             |             |
|-------|---|-----------|-------------|-------------|
| chr12 | C | 25203229  | 17.89915296 | 0.000138802 |
| chr15 | C | 91228395  | 17.90048442 | 0.00013875  |
| chr6  | C | 161351917 | 17.90494839 | 0.000138576 |
| chr2  | G | 236109520 | 17.91056724 | 0.000138357 |
| chr19 | G | 40030704  | 17.93946439 | 0.000137239 |
| chr3  | G | 177427523 | 17.94125908 | 0.00013717  |
| chr12 | C | 58171356  | 17.96101623 | 0.000136411 |
| chr9  | G | 101498664 | 17.96365608 | 0.00013631  |
| chr3  | C | 41882537  | 17.99093455 | 0.000135272 |
| chr10 | G | 99072734  | 17.99681099 | 0.00013505  |
| chr19 | C | 2726033   | 18.07705832 | 0.000132054 |
| chr10 | G | 118032128 | 18.0775025  | 0.000132037 |
| chr17 | C | 43685699  | 18.08258023 | 0.00013185  |
| chr15 | C | 73337128  | 18.08385536 | 0.000131803 |
| chr17 | C | 76042477  | 18.08539832 | 0.000131747 |
| chr16 | G | 30409593  | 18.11907209 | 0.000130515 |
| chr12 | G | 27963300  | 18.12542098 | 0.000130285 |
| chr7  | C | 134897322 | 18.12885567 | 0.00013016  |
| chr1  | G | 203774052 | 18.14828396 | 0.000129458 |
| chr9  | G | 95761961  | 18.15021407 | 0.000129388 |
| chr8  | G | 142439259 | 18.1565188  | 0.000129161 |
| chr17 | G | 33027278  | 18.15823534 | 0.0001291   |
| chr13 | C | 22113671  | 18.19245293 | 0.000127877 |
| chr5  | G | 171850936 | 18.19545663 | 0.000127771 |
| chr1  | G | 171497665 | 18.20852132 | 0.000127308 |
| chr1  | C | 65267289  | 18.23610449 | 0.000126337 |
| chr15 | C | 45926882  | 18.24096234 | 0.000126167 |
| chr11 | G | 91431578  | 18.26715561 | 0.000125254 |
| chr3  | C | 184017247 | 18.27644579 | 0.000124932 |
| chr20 | C | 61653152  | 18.27661268 | 0.000124926 |
| chr19 | C | 3818252   | 18.2967245  | 0.000124233 |
| chr22 | C | 34795697  | 18.32411926 | 0.000123295 |
| chr2  | G | 86156360  | 18.33846458 | 0.000122807 |
| chr5  | C | 7850491   | 18.34257845 | 0.000122668 |
| chr5  | C | 31572256  | 18.34736978 | 0.000122506 |
| chr10 | C | 127105578 | 18.34994537 | 0.000122419 |
| chr1  | C | 165569564 | 18.35431654 | 0.000122271 |
| chr7  | G | 14729047  | 18.36048016 | 0.000122063 |
| chr9  | C | 95376150  | 18.36456453 | 0.000121925 |
| chr7  | G | 1507313   | 18.38757308 | 0.000121154 |
| chr14 | C | 50059209  | 18.40035034 | 0.000120728 |
| chr9  | G | 82800329  | 18.4166939  | 0.000120186 |
| chr14 | C | 66975681  | 18.42407948 | 0.000119942 |



|       |   |           |             |             |
|-------|---|-----------|-------------|-------------|
| chr13 | G | 26966705  | 18.45267305 | 0.000119002 |
| chr10 | C | 135205587 | 18.45911989 | 0.000118791 |
| chr7  | G | 145447176 | 18.48273953 | 0.000118022 |
| chr9  | G | 139706879 | 18.49350951 | 0.000117674 |
| chr5  | G | 175949132 | 18.50724553 | 0.000117231 |
| chr3  | G | 112996962 | 18.51324723 | 0.000117038 |
| chr4  | G | 184594548 | 18.51418635 | 0.000117008 |
| chr17 | C | 77771378  | 18.5153955  | 0.000116969 |
| chr13 | G | 49880445  | 18.52150359 | 0.000116773 |
| chr19 | C | 8064612   | 18.52255847 | 0.000116739 |
| chr11 | G | 3654490   | 18.52513646 | 0.000116657 |
| chr17 | G | 61673507  | 18.52849907 | 0.000116549 |
| chr21 | C | 43166463  | 18.54035647 | 0.000116171 |
| chr6  | C | 107879706 | 18.54985835 | 0.000115869 |
| chr3  | G | 170137764 | 18.55863472 | 0.000115591 |
| chr21 | C | 47546166  | 18.56036156 | 0.000115536 |
| chr4  | G | 28871650  | 18.5617064  | 0.000115493 |
| chr8  | G | 2019333   | 18.56240668 | 0.000115471 |
| chr19 | G | 8005966   | 18.57499053 | 0.000115074 |
| chr16 | G | 29701115  | 18.58942868 | 0.00011462  |
| chr17 | C | 8954737   | 18.5907937  | 0.000114578 |
| chr21 | C | 46892956  | 18.60265824 | 0.000114207 |
| chr2  | C | 199917384 | 18.60660765 | 0.000114083 |
| chr19 | G | 43115101  | 18.61676773 | 0.000113767 |
| chr3  | G | 195929576 | 18.62353847 | 0.000113557 |
| chr16 | G | 55102236  | 18.63833095 | 0.000113099 |
| chr19 | C | 12807018  | 18.68019469 | 0.000111814 |
| chr11 | C | 62511800  | 18.68745568 | 0.000111593 |
| chr8  | G | 117998729 | 18.68931283 | 0.000111537 |
| chr1  | C | 201083692 | 18.69235363 | 0.000111445 |
| chr2  | G | 232571708 | 18.70648203 | 0.000111017 |
| chr8  | G | 74277063  | 18.7433853  | 0.000109907 |
| chr22 | C | 27092400  | 18.75696344 | 0.000109502 |
| chr19 | G | 19747129  | 18.76385974 | 0.000109297 |
| chr16 | G | 3313431   | 18.84103078 | 0.000107033 |
| chr7  | G | 98467304  | 18.84201564 | 0.000107004 |
| chr14 | G | 55907287  | 18.85137825 | 0.000106733 |
| chr9  | C | 100000288 | 18.89400073 | 0.00010551  |
| chr22 | C | 39485211  | 18.95464127 | 0.000103796 |
| chr1  | C | 58989366  | 18.96422181 | 0.000103528 |
| chr5  | C | 109169238 | 18.96656319 | 0.000103463 |
| chr21 | G | 47706564  | 19.00445983 | 0.000102412 |
| chr13 | G | 25803510  | 19.0240434  | 0.000101874 |

|       |   |           |             |             |
|-------|---|-----------|-------------|-------------|
| chr1  | G | 205600506 | 19.03034368 | 0.000101701 |
| chr9  | C | 87064946  | 19.04220101 | 0.000101378 |
| chr3  | G | 119131006 | 19.05954264 | 0.000100906 |
| chr5  | C | 1483820   | 19.06597421 | 0.000100732 |
| chr2  | G | 232120776 | 19.08322169 | 0.000100267 |
| chr1  | C | 18029650  | 19.08762877 | 0.000100148 |
| chr1  | C | 861437    | 19.09807761 | 9.99E-05    |
| chr5  | C | 6209812   | 19.11287302 | 9.95E-05    |
| chr5  | G | 41320819  | 19.1468657  | 9.86E-05    |
| chr16 | G | 3014406   | 19.15819455 | 9.83E-05    |
| chr1  | G | 228783101 | 19.16734522 | 9.80E-05    |
| chr8  | G | 141644753 | 19.19584207 | 9.73E-05    |
| chr4  | G | 62067924  | 19.21382298 | 9.68E-05    |
| chr19 | G | 7999736   | 19.24970374 | 9.59E-05    |
| chr19 | C | 45389594  | 19.25859442 | 9.57E-05    |
| chr6  | C | 151586007 | 19.2659371  | 9.55E-05    |
| chr6  | C | 98864701  | 19.2753089  | 9.52E-05    |
| chr5  | C | 175984608 | 19.29427805 | 9.48E-05    |
| chr19 | G | 3633278   | 19.29672153 | 9.47E-05    |
| chr12 | C | 113531132 | 19.31603976 | 9.42E-05    |
| chr12 | C | 61373143  | 19.33056871 | 9.39E-05    |
| chr1  | C | 22191369  | 19.33522059 | 9.37E-05    |
| chr2  | G | 190623031 | 19.3413426  | 9.36E-05    |
| chr1  | C | 247536420 | 19.34721653 | 9.34E-05    |
| chr17 | C | 63859606  | 19.35931043 | 9.31E-05    |
| chr5  | C | 16713684  | 19.35948612 | 9.31E-05    |
| chr12 | C | 121838545 | 19.36608695 | 9.30E-05    |
| chr8  | G | 10571220  | 19.38587279 | 9.25E-05    |
| chr19 | G | 1663776   | 19.40029691 | 9.21E-05    |
| chr1  | C | 218729153 | 19.40416857 | 9.20E-05    |
| chr6  | C | 98864691  | 19.41327402 | 9.18E-05    |
| chr6  | G | 119861844 | 19.42671291 | 9.15E-05    |
| chr11 | G | 2912408   | 19.43050532 | 9.14E-05    |
| chr21 | C | 44742341  | 19.45046567 | 9.09E-05    |
| chr10 | C | 121485172 | 19.45653649 | 9.08E-05    |
| chr1  | C | 2517784   | 19.48632282 | 9.01E-05    |
| chr22 | G | 39627518  | 19.49297532 | 8.99E-05    |
| chr6  | C | 29606111  | 19.51619795 | 8.94E-05    |
| chr7  | G | 100952388 | 19.52251245 | 8.92E-05    |
| chr4  | G | 170004004 | 19.53307087 | 8.90E-05    |
| chr1  | C | 53110504  | 19.5410065  | 8.88E-05    |
| chr7  | G | 95802156  | 19.56723892 | 8.82E-05    |
| chr2  | C | 88686882  | 19.6060801  | 8.73E-05    |

|       |   |           |             |          |
|-------|---|-----------|-------------|----------|
| chr3  | C | 47620542  | 19.61432139 | 8.71E-05 |
| chr6  | C | 168482109 | 19.63617191 | 8.66E-05 |
| chr1  | G | 6240046   | 19.65890693 | 8.61E-05 |
| chr4  | C | 31998350  | 19.68034217 | 8.56E-05 |
| chr21 | G | 33365933  | 19.70688704 | 8.50E-05 |
| chr3  | G | 128560262 | 19.73482473 | 8.44E-05 |
| chr12 | C | 49879049  | 19.76057963 | 8.38E-05 |
| chr8  | C | 37552029  | 19.77478976 | 8.35E-05 |
| chr9  | C | 98783536  | 19.78455511 | 8.33E-05 |
| chr16 | C | 29179556  | 19.78802922 | 8.32E-05 |
| chr12 | C | 123472805 | 19.79452958 | 8.31E-05 |
| chr7  | C | 90070524  | 19.79769067 | 8.30E-05 |
| chr2  | G | 85251020  | 19.80403225 | 8.28E-05 |
| chr10 | G | 129105763 | 19.83134834 | 8.23E-05 |
| chr3  | C | 183471309 | 19.83820114 | 8.21E-05 |
| chr9  | G | 135398567 | 19.84080439 | 8.21E-05 |
| chr4  | C | 619822    | 19.8645915  | 8.16E-05 |
| chr6  | G | 35287669  | 19.87394148 | 8.14E-05 |
| chr1  | G | 28153498  | 19.8837396  | 8.11E-05 |
| chr5  | G | 177622499 | 19.88648299 | 8.11E-05 |
| chr16 | C | 85518385  | 19.89040075 | 8.10E-05 |
| chr6  | C | 42018338  | 19.90444217 | 8.07E-05 |
| chr12 | C | 57095437  | 19.92107959 | 8.04E-05 |
| chr19 | G | 42727456  | 19.92593076 | 8.03E-05 |
| chr6  | G | 43165368  | 19.9339893  | 8.01E-05 |
| chr7  | C | 155250839 | 19.9820955  | 7.91E-05 |
| chr2  | C | 207307731 | 20.00650604 | 7.86E-05 |
| chr16 | G | 23793508  | 20.01039958 | 7.85E-05 |
| chr19 | G | 2692355   | 20.10763805 | 7.66E-05 |
| chr19 | G | 643854    | 20.11449174 | 7.64E-05 |
| chr1  | G | 156106164 | 20.1160819  | 7.64E-05 |
| chr19 | C | 37795835  | 20.13309215 | 7.61E-05 |
| chr4  | C | 816653    | 20.15879741 | 7.56E-05 |
| chr5  | G | 177009140 | 20.18531463 | 7.50E-05 |
| chr12 | G | 2757160   | 20.21853593 | 7.44E-05 |
| chr8  | C | 60459751  | 20.31606314 | 7.26E-05 |
| chr2  | G | 134928944 | 20.33168612 | 7.23E-05 |
| chr15 | C | 33811650  | 20.3438315  | 7.21E-05 |
| chr1  | C | 17811702  | 20.40805576 | 7.09E-05 |
| chr11 | C | 125956952 | 20.40943636 | 7.09E-05 |
| chr19 | C | 16394535  | 20.43305799 | 7.04E-05 |
| chr9  | G | 120059427 | 20.45287074 | 7.01E-05 |
| chr6  | G | 125965903 | 20.49549984 | 6.93E-05 |

|       |   |           |             |          |
|-------|---|-----------|-------------|----------|
| chr16 | G | 87099247  | 20.50140055 | 6.92E-05 |
| chr5  | G | 175977381 | 20.50421886 | 6.92E-05 |
| chr20 | C | 13201224  | 20.53052419 | 6.87E-05 |
| chr10 | G | 93609952  | 20.53332672 | 6.87E-05 |
| chr21 | G | 38527291  | 20.54132473 | 6.85E-05 |
| chr16 | G | 4381557   | 20.54715825 | 6.84E-05 |
| chr8  | C | 8548788   | 20.59566615 | 6.76E-05 |
| chr18 | G | 74000625  | 20.6013643  | 6.75E-05 |
| chr1  | G | 25451823  | 20.60869357 | 6.74E-05 |
| chr19 | G | 1244449   | 20.68422096 | 6.61E-05 |
| chr6  | G | 81795852  | 20.70199707 | 6.58E-05 |
| chr16 | C | 28257318  | 20.72678947 | 6.54E-05 |
| chr4  | C | 109094517 | 20.72689275 | 6.54E-05 |
| chr15 | G | 27471602  | 20.72741407 | 6.54E-05 |
| chr21 | G | 38379036  | 20.76003597 | 6.48E-05 |
| chr2  | C | 65086988  | 20.77503898 | 6.46E-05 |
| chr16 | G | 15528324  | 20.77733265 | 6.45E-05 |
| chr19 | G | 55776686  | 20.81353753 | 6.40E-05 |
| chr7  | C | 73121444  | 20.84226919 | 6.35E-05 |
| chr5  | C | 476920    | 20.8431221  | 6.35E-05 |
| chr9  | G | 132426676 | 20.8556142  | 6.33E-05 |
| chr2  | C | 121636363 | 20.89242446 | 6.27E-05 |
| chr16 | G | 48093079  | 20.89620328 | 6.26E-05 |
| chr3  | C | 101359791 | 20.94403133 | 6.19E-05 |
| chr22 | C | 21054266  | 20.94851813 | 6.18E-05 |
| chr1  | G | 85463239  | 20.95221587 | 6.18E-05 |
| chr4  | G | 31998366  | 20.9617167  | 6.16E-05 |
| chr9  | C | 37514629  | 20.97361593 | 6.14E-05 |
| chr11 | C | 1014999   | 20.98168404 | 6.13E-05 |
| chr19 | G | 11097307  | 21.0583101  | 6.02E-05 |
| chr20 | G | 17486132  | 21.07155419 | 6.00E-05 |
| chr12 | C | 6973357   | 21.10657889 | 5.94E-05 |
| chr5  | C | 176291584 | 21.16195268 | 5.86E-05 |
| chr7  | C | 100323269 | 21.18709906 | 5.83E-05 |
| chr6  | C | 98864679  | 21.23221161 | 5.76E-05 |
| chr2  | G | 30413531  | 21.24924953 | 5.74E-05 |
| chr19 | G | 1763923   | 21.26904041 | 5.71E-05 |
| chr10 | C | 115834210 | 21.2867283  | 5.68E-05 |
| chr11 | C | 68219704  | 21.2882147  | 5.68E-05 |
| chr22 | C | 44320088  | 21.39557389 | 5.53E-05 |
| chr16 | C | 32005988  | 21.41455984 | 5.51E-05 |
| chr4  | G | 61339933  | 21.47958454 | 5.42E-05 |
| chr16 | C | 56703587  | 21.54044346 | 5.34E-05 |

|       |   |           |             |          |
|-------|---|-----------|-------------|----------|
| chr16 | G | 697529    | 21.56429865 | 5.31E-05 |
| chr10 | C | 13982687  | 21.59283568 | 5.27E-05 |
| chr11 | C | 128781479 | 21.64945538 | 5.20E-05 |
| chr9  | C | 139236633 | 21.65577214 | 5.19E-05 |
| chr4  | G | 1286565   | 21.66120976 | 5.18E-05 |
| chr1  | G | 45251963  | 21.68890246 | 5.15E-05 |
| chr12 | G | 65097253  | 21.76198555 | 5.06E-05 |
| chr1  | G | 226423243 | 21.77858273 | 5.04E-05 |
| chr19 | C | 16785335  | 21.86552483 | 4.93E-05 |
| chr10 | C | 43582823  | 21.88012505 | 4.91E-05 |
| chr7  | G | 56109382  | 21.91384257 | 4.87E-05 |
| chr16 | C | 4318286   | 21.9191775  | 4.87E-05 |
| chr12 | G | 4061592   | 21.94309791 | 4.84E-05 |
| chr17 | C | 78847067  | 21.96256885 | 4.82E-05 |
| chr22 | G | 24226429  | 21.98716227 | 4.79E-05 |
| chr22 | G | 24729012  | 22.00097143 | 4.77E-05 |
| chr5  | C | 138605458 | 22.14872993 | 4.61E-05 |
| chr17 | G | 46801379  | 22.16111826 | 4.59E-05 |
| chr6  | G | 167909958 | 22.17215639 | 4.58E-05 |
| chr16 | C | 75657942  | 22.21355544 | 4.54E-05 |
| chr19 | G | 19776408  | 22.25876443 | 4.49E-05 |
| chr7  | C | 73119006  | 22.29624889 | 4.45E-05 |
| chr3  | C | 107382744 | 22.29638981 | 4.45E-05 |
| chr1  | C | 33367400  | 22.31181203 | 4.43E-05 |
| chr3  | G | 50268996  | 22.37899334 | 4.36E-05 |
| chr7  | G | 14729001  | 22.38409296 | 4.35E-05 |
| chr16 | C | 24655551  | 22.5477481  | 4.19E-05 |
| chr19 | G | 55412653  | 22.71816736 | 4.02E-05 |
| chr11 | C | 6206715   | 22.7468434  | 4.00E-05 |
| chr2  | G | 130413868 | 22.755575   | 3.99E-05 |
| chr6  | C | 88488767  | 22.83670386 | 3.91E-05 |
| chr17 | G | 4981941   | 22.9318599  | 3.83E-05 |
| chrX  | G | 20073873  | 22.98675262 | 3.78E-05 |
| chr1  | G | 209921211 | 22.99297156 | 3.77E-05 |
| chr10 | G | 70782491  | 23.0145874  | 3.75E-05 |
| chr16 | C | 88748643  | 23.02453031 | 3.74E-05 |
| chr21 | G | 42531547  | 23.02747098 | 3.74E-05 |
| chr2  | C | 156822718 | 23.11075206 | 3.67E-05 |
| chr14 | G | 70014924  | 23.22906635 | 3.57E-05 |
| chr22 | C | 46793977  | 23.24644386 | 3.56E-05 |
| chr6  | G | 67776753  | 23.27047083 | 3.54E-05 |
| chr7  | G | 158063070 | 23.29099697 | 3.52E-05 |
| chr7  | C | 87105161  | 23.43802155 | 3.40E-05 |

|       |   |           |             |          |
|-------|---|-----------|-------------|----------|
| chr22 | C | 39783940  | 23.45841875 | 3.39E-05 |
| chr16 | C | 89138031  | 23.56988853 | 3.30E-05 |
| chr17 | G | 2712491   | 23.70860401 | 3.20E-05 |
| chr7  | G | 64160221  | 23.79249659 | 3.14E-05 |
| chr3  | G | 196730838 | 23.83675277 | 3.11E-05 |
| chr17 | G | 30613746  | 23.9667045  | 3.02E-05 |
| chr19 | G | 48983737  | 24.03161675 | 2.97E-05 |
| chr21 | G | 38042429  | 24.03718012 | 2.97E-05 |
| chr17 | C | 28015120  | 24.09031738 | 2.93E-05 |
| chr2  | G | 208635422 | 24.14197765 | 2.90E-05 |
| chr17 | G | 66205630  | 24.14651569 | 2.90E-05 |
| chr7  | G | 153339286 | 24.14984039 | 2.89E-05 |
| chr21 | G | 46714021  | 24.27627433 | 2.81E-05 |
| chr20 | G | 60029424  | 24.33618744 | 2.78E-05 |
| chr10 | C | 14624856  | 24.44178606 | 2.71E-05 |
| chr21 | C | 44823391  | 24.58929305 | 2.62E-05 |
| chr20 | C | 18478464  | 24.60305672 | 2.62E-05 |
| chr11 | G | 129910646 | 24.7847042  | 2.51E-05 |
| chr2  | G | 96010872  | 24.85003457 | 2.48E-05 |
| chr4  | C | 31998335  | 24.87978447 | 2.46E-05 |
| chr6  | G | 113996881 | 24.93955455 | 2.43E-05 |
| chr7  | C | 5419012   | 25.09046881 | 2.35E-05 |
| chr5  | C | 173132692 | 25.09256997 | 2.35E-05 |
| chr11 | C | 46427763  | 25.15057807 | 2.32E-05 |
| chr16 | G | 84378562  | 25.16879022 | 2.31E-05 |
| chr1  | C | 60280478  | 25.17954514 | 2.30E-05 |
| chr10 | G | 19430957  | 25.30188848 | 2.24E-05 |
| chr17 | C | 4609342   | 25.40303855 | 2.20E-05 |
| chr3  | C | 30578121  | 25.4110116  | 2.19E-05 |
| chr14 | C | 38384196  | 25.42386949 | 2.19E-05 |
| chr21 | G | 38065594  | 25.43351262 | 2.18E-05 |
| chr14 | C | 78233370  | 25.43812417 | 2.18E-05 |
| chr7  | G | 78443026  | 25.4594948  | 2.17E-05 |
| chr5  | G | 777936    | 25.51156991 | 2.14E-05 |
| chr9  | C | 131390306 | 25.51473943 | 2.14E-05 |
| chr13 | C | 43464675  | 25.59131306 | 2.11E-05 |
| chr3  | C | 61615069  | 25.92918373 | 1.96E-05 |
| chr17 | C | 79020754  | 25.98806384 | 1.94E-05 |
| chr4  | G | 39448767  | 26.04417029 | 1.91E-05 |
| chr11 | C | 46923518  | 26.47526219 | 1.75E-05 |
| chr9  | G | 133027146 | 26.52237347 | 1.73E-05 |
| chr1  | G | 151213456 | 26.77375723 | 1.64E-05 |
| chr2  | G | 237081688 | 26.78255244 | 1.64E-05 |

|       |   |           |             |          |
|-------|---|-----------|-------------|----------|
| chr9  | C | 98783493  | 27.02331811 | 1.56E-05 |
| chr11 | C | 102129780 | 27.06591163 | 1.55E-05 |
| chr16 | G | 69433092  | 27.49060511 | 1.42E-05 |
| chr1  | C | 210286515 | 27.59460966 | 1.39E-05 |
| chr16 | G | 9815602   | 27.76176124 | 1.34E-05 |
| chr6  | G | 125965884 | 27.77904222 | 1.34E-05 |
| chr7  | G | 69573805  | 28.05104861 | 1.27E-05 |
| chr5  | C | 45236417  | 28.14670716 | 1.24E-05 |
| chr19 | G | 57306702  | 28.5853105  | 1.14E-05 |
| chr1  | C | 211814235 | 29.09212685 | 1.03E-05 |
| chr19 | C | 1986962   | 29.19409176 | 1.01E-05 |
| chr1  | G | 87318151  | 29.28040502 | 9.95E-06 |
| chr9  | C | 73027767  | 29.35777765 | 9.81E-06 |
| chr16 | C | 20276177  | 29.3670994  | 9.79E-06 |
| chr19 | C | 34012056  | 29.48974074 | 9.56E-06 |
| chr12 | G | 54714521  | 29.61478272 | 9.33E-06 |
| chr10 | G | 133979026 | 29.74360768 | 9.11E-06 |
| chr7  | C | 1577752   | 29.87984678 | 8.87E-06 |
| chr10 | G | 892662    | 29.90630235 | 8.83E-06 |
| chr3  | G | 186802206 | 30.03629781 | 8.62E-06 |
| chr17 | C | 57623922  | 30.54213356 | 7.84E-06 |
| chr19 | C | 50404294  | 30.56923733 | 7.80E-06 |
| chr18 | C | 3224913   | 30.84523093 | 7.41E-06 |
| chr15 | C | 43819695  | 31.12078321 | 7.04E-06 |
| chr1  | C | 16906622  | 31.59612188 | 6.45E-06 |
| chr5  | C | 161791220 | 31.91351731 | 6.10E-06 |
| chr19 | G | 30272711  | 32.51121137 | 5.48E-06 |
| chr6  | G | 114024239 | 32.64586161 | 5.35E-06 |
| chr1  | G | 174890311 | 32.68674103 | 5.31E-06 |
| chr20 | G | 29612531  | 33.04352941 | 4.99E-06 |
| chr2  | C | 242531904 | 33.92830143 | 4.28E-06 |
| chr16 | C | 1172236   | 34.71567695 | 3.75E-06 |
| chr8  | C | 64259670  | 34.87792173 | 3.65E-06 |
| chr22 | C | 43781719  | 35.22067618 | 3.44E-06 |
| chr1  | C | 245468965 | 35.56838575 | 3.25E-06 |
| chr10 | G | 34292990  | 35.57691815 | 3.25E-06 |
| chr22 | G | 29417765  | 35.71506227 | 3.17E-06 |
| chr11 | G | 70438293  | 35.82746014 | 3.12E-06 |
| chr16 | C | 2299284   | 35.93171868 | 3.06E-06 |
| chr8  | C | 87450172  | 37.79281243 | 2.28E-06 |
| chr11 | C | 116704538 | 37.89475618 | 2.24E-06 |
| chr20 | G | 48994061  | 38.28345627 | 2.11E-06 |
| chr8  | C | 146032903 | 38.54235931 | 2.03E-06 |

|       |   |           |             |          |
|-------|---|-----------|-------------|----------|
| chr12 | G | 57484039  | 41.92119821 | 1.23E-06 |
| chr7  | C | 1534584   | 41.98317245 | 1.22E-06 |
| chr7  | G | 1710216   | 46.30482149 | 6.73E-07 |
| chr11 | C | 119020558 | 47.13443506 | 6.04E-07 |
| chr3  | G | 134496748 | 49.59765984 | 4.43E-07 |
| chr2  | G | 73613150  | 62.70241049 | 1.03E-07 |
| chr16 | G | 85645812  | 89.31731359 | 1.07E-08 |
| chr17 | C | 43209513  | 104.0748899 | 3.95E-09 |
| chr10 | C | 104775421 | 109.8227952 | 2.77E-09 |
| chr4  | C | 159803591 | 145.2075258 | 4.35E-10 |
| chr5  | C | 67178473  | 184.8716266 | 8.60E-11 |
| chr14 | G | 35072408  | 233.9057387 | 1.75E-11 |
