# Supplementary material
Source: PubMed Central journal article supplement (PMC6348426)
Supplement: methylationSupplementaryFile11.pdf [file methylationSupplementaryFile11.pdf]

### Supplementary File 11. Functional analysis of low and high methylation genes

|                       | <b>Low Methylation DMR (corrected <i>P</i> value)</b>                                                                                                                                                                                             | <b>High Methylation DMR (corrected <i>P</i> value)</b>                                                                                                        |
|-----------------------|---------------------------------------------------------------------------------------------------------------------------------------------------------------------------------------------------------------------------------------------------|---------------------------------------------------------------------------------------------------------------------------------------------------------------|
| GO Molecular Function | <ul style="list-style-type: none"> <li>• N-acetylmuramoyl-L-alanine amidase activity (0.0240)</li> <li>• peptidoglycan receptor activity (0.0159)</li> </ul>                                                                                      | <ul style="list-style-type: none"> <li>• Protein kinase A catalytic subunit binding (0.0097)</li> </ul>                                                       |
| InterPro              | <ul style="list-style-type: none"> <li>• Cytoskeleton-associated protein 2 family (0.0286)</li> <li>• Peptidoglycan recognition protein family domain, metazoa/bacteria (0.0307)</li> <li>• Peptidoglycan recognition protein (0.0307)</li> </ul> | <ul style="list-style-type: none"> <li>• Suppressor of white apricot N-terminal domain (0.0297)</li> <li>• GPCR, family 2-like (0.0163)</li> </ul>            |
| TreeFam               |                                                                                                                                                                                                                                                   | <ul style="list-style-type: none"> <li>• Splicing factor, arginine/serine-rich 8 (suppressor-of-white-apricot homolog, <i>Drosophila</i>) (0.0143)</li> </ul> |
