# Supplementary material
Source: PubMed Central journal article supplement (PMC6348426)

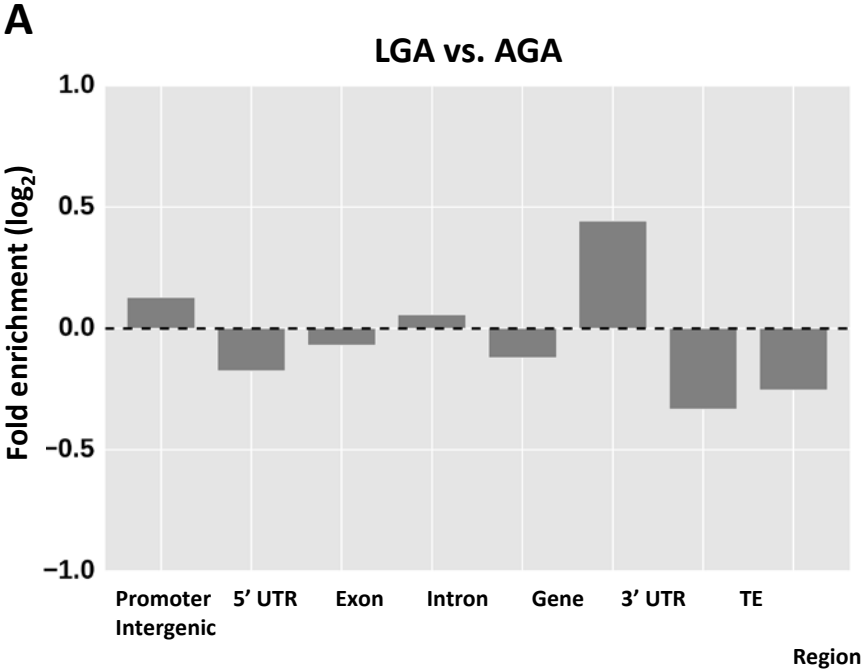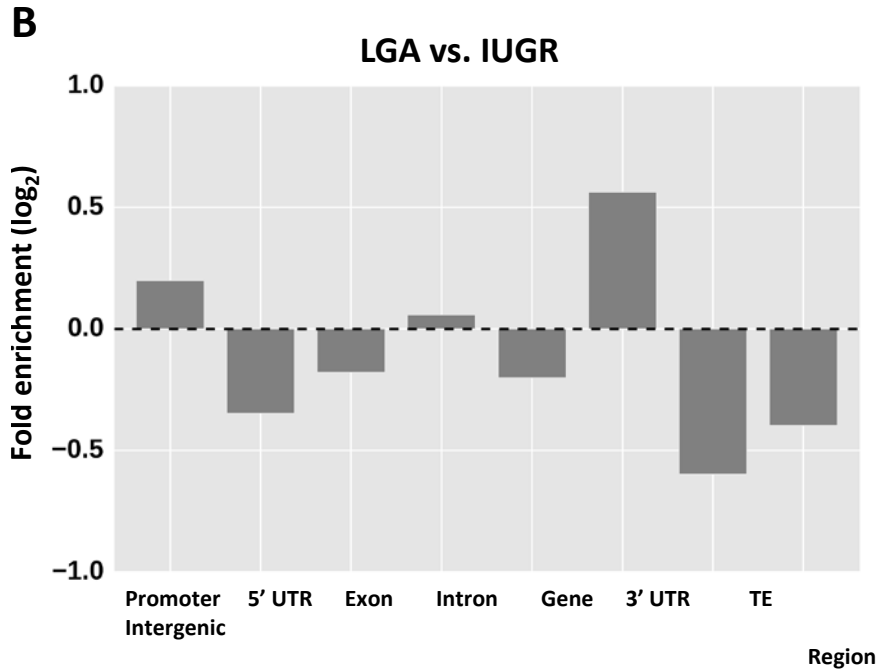

Supplement: methylationSupplementaryFile12.pdf [file methylationSupplementaryFile12.pdf]

A

| Group  | Autosomes      | chrX           | chrY           | ALL            |
|--------|----------------|----------------|----------------|----------------|
| ALL    | 50.798 (1.086) | 50.272 (2.595) | 52.361 (2.154) | 50.743 (1.118) |
| Male   | 51.059 (0.875) | 52.359 (0.912) | 52.361 (2.154) | 51.098 (0.876) |
| Female | 50.504 (1.278) | 47.924 (1.595) |                | 50.344 (1.279) |

B

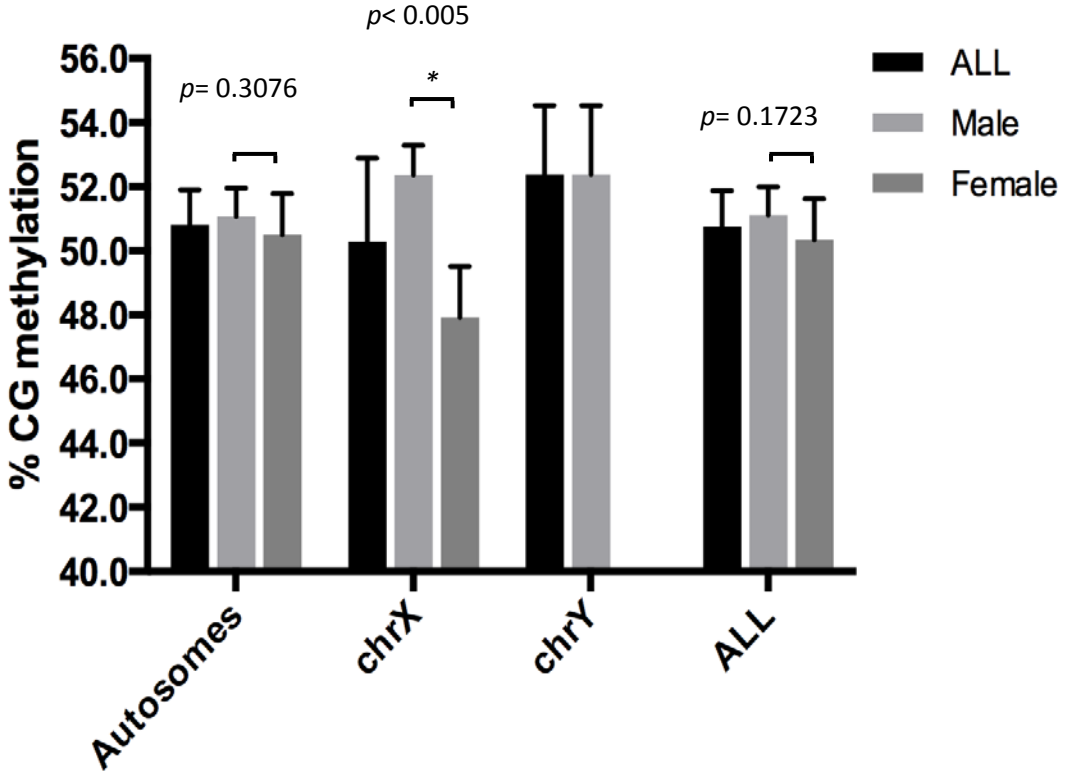

Supplement: methylationSupplementaryFile5.pdf [file methylationSupplementaryFile5.pdf]

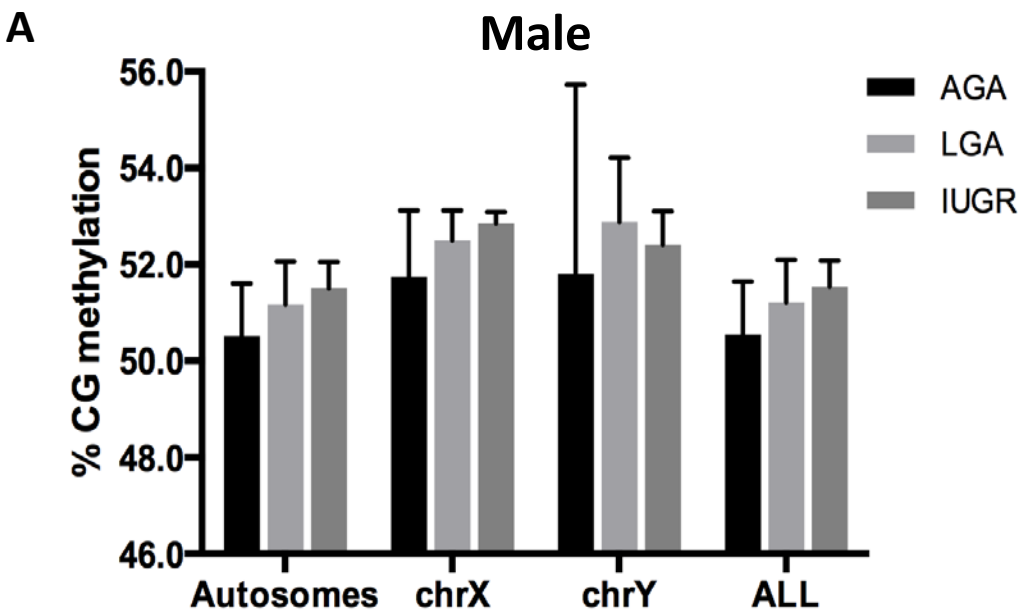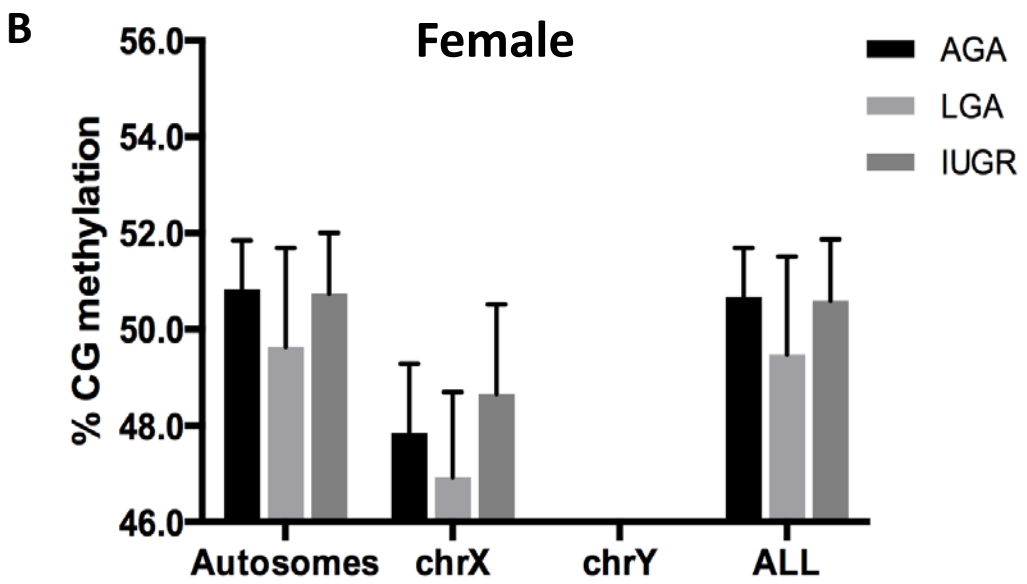

Supplement: methylationSupplementaryFile6.pdf [file methylationSupplementaryFile6.pdf]

# Supplementary A

## File 8

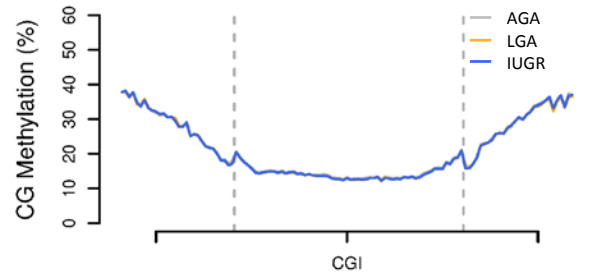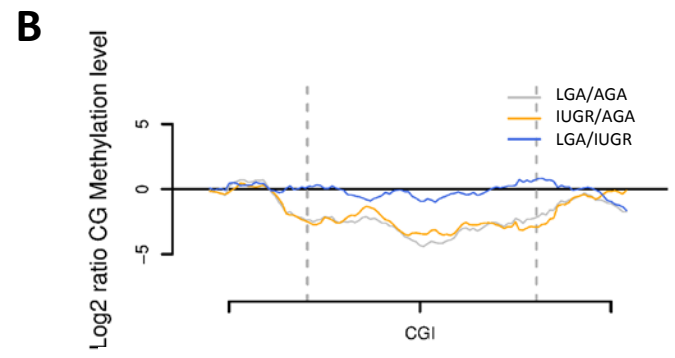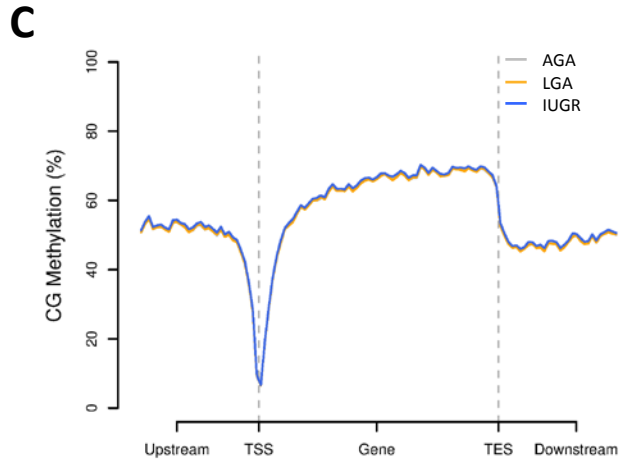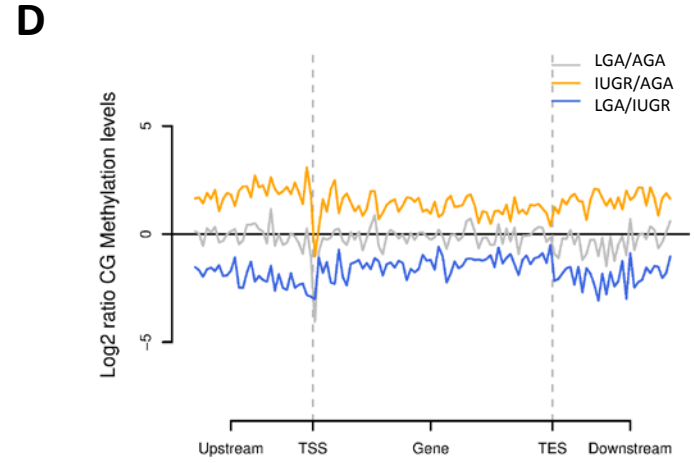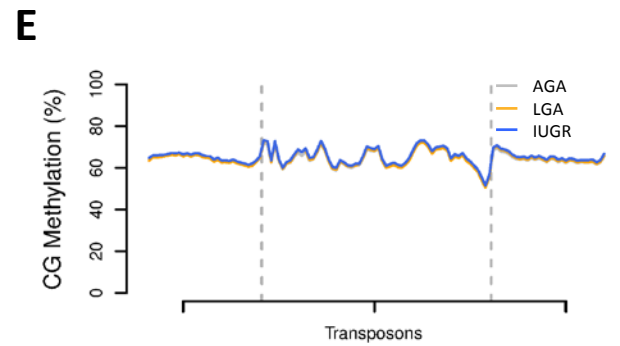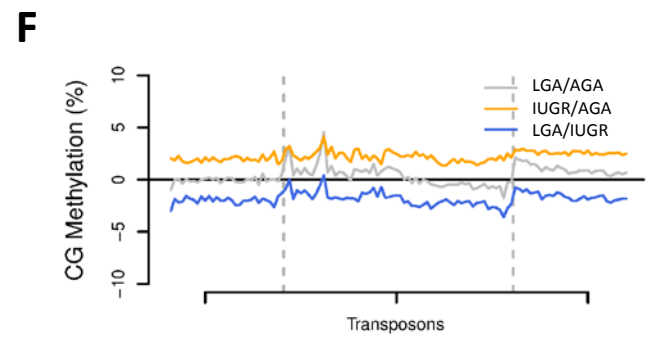

Supplement: methylationSupplementaryFile8.pdf [file methylationSupplementaryFile8.pdf]
